# Supplementary material for: DIALib: an automated ion library generator for data independent acquisition mass spectrometry analysis of peptides and glycopeptides
Source: bioRxiv preprint, doi:10.1101/696518, version 2 (2020-01-21)
Supplement: Supplementary Table S3 [file 696518_file03.xlsx]

## Sheet: Y ion
Q1	Q3	RT_detected	protein_name	isotype	relative_intensity	stripped_sequence	modification_sequence	prec_z	frg_type	frg_z	frg_nr	iRT	uniprot_id	score	decoy	prec_y	confidence	shared	N	rank	mods	nterm	cterm
412.5	1795.84	12	GAS1-N95TT		1	VYAINTTLDHSECMK	VYAIN[412]TTLDHSEC[PPa]MK	2	Y	1	1	12	GAS1-N95TT	0	FALSE	0	0.99	FALSE	1
437	1795.84	12	GAS1-N95TT		1	VYAINTTLDHSECMK	VYAIN[437]TTLDHSEC[PPa]MK	2	Y	1	1	12	GAS1-N95TT	0	FALSE	0	0.99	FALSE	1
462	1795.84	12	GAS1-N95TT		1	VYAINTTLDHSECMK	VYAIN[462]TTLDHSEC[PPa]MK	2	Y	1	1	12	GAS1-N95TT	0	FALSE	0	0.99	FALSE	1
487	1795.84	12	GAS1-N95TT		1	VYAINTTLDHSECMK	VYAIN[487]TTLDHSEC[PPa]MK	2	Y	1	1	12	GAS1-N95TT	0	FALSE	0	0.99	FALSE	1
512	1795.84	12	GAS1-N95TT		1	VYAINTTLDHSECMK	VYAIN[512]TTLDHSEC[PPa]MK	2	Y	1	1	12	GAS1-N95TT	0	FALSE	0	0.99	FALSE	1
537	1795.84	12	GAS1-N95TT		1	VYAINTTLDHSECMK	VYAIN[537]TTLDHSEC[PPa]MK	2	Y	1	1	12	GAS1-N95TT	0	FALSE	0	0.99	FALSE	1
562	1795.84	12	GAS1-N95TT		1	VYAINTTLDHSECMK	VYAIN[562]TTLDHSEC[PPa]MK	2	Y	1	1	12	GAS1-N95TT	0	FALSE	0	0.99	FALSE	1
587	1795.84	12	GAS1-N95TT		1	VYAINTTLDHSECMK	VYAIN[587]TTLDHSEC[PPa]MK	2	Y	1	1	12	GAS1-N95TT	0	FALSE	0	0.99	FALSE	1
612	1795.84	12	GAS1-N95TT		1	VYAINTTLDHSECMK	VYAIN[612]TTLDHSEC[PPa]MK	2	Y	1	1	12	GAS1-N95TT	0	FALSE	0	0.99	FALSE	1
637	1795.84	12	GAS1-N95TT		1	VYAINTTLDHSECMK	VYAIN[637]TTLDHSEC[PPa]MK	2	Y	1	1	12	GAS1-N95TT	0	FALSE	0	0.99	FALSE	1
662	1795.84	12	GAS1-N95TT		1	VYAINTTLDHSECMK	VYAIN[662]TTLDHSEC[PPa]MK	2	Y	1	1	12	GAS1-N95TT	0	FALSE	0	0.99	FALSE	1
687	1795.84	12	GAS1-N95TT		1	VYAINTTLDHSECMK	VYAIN[687]TTLDHSEC[PPa]MK	2	Y	1	1	12	GAS1-N95TT	0	FALSE	0	0.99	FALSE	1
712	1795.84	12	GAS1-N95TT		1	VYAINTTLDHSECMK	VYAIN[712]TTLDHSEC[PPa]MK	2	Y	1	1	12	GAS1-N95TT	0	FALSE	0	0.99	FALSE	1
737	1795.84	12	GAS1-N95TT		1	VYAINTTLDHSECMK	VYAIN[737]TTLDHSEC[PPa]MK	2	Y	1	1	12	GAS1-N95TT	0	FALSE	0	0.99	FALSE	1
762	1795.84	12	GAS1-N95TT		1	VYAINTTLDHSECMK	VYAIN[762]TTLDHSEC[PPa]MK	2	Y	1	1	12	GAS1-N95TT	0	FALSE	0	0.99	FALSE	1
787	1795.84	12	GAS1-N95TT		1	VYAINTTLDHSECMK	VYAIN[787]TTLDHSEC[PPa]MK	2	Y	1	1	12	GAS1-N95TT	0	FALSE	0	0.99	FALSE	1
812	1795.84	12	GAS1-N95TT		1	VYAINTTLDHSECMK	VYAIN[812]TTLDHSEC[PPa]MK	2	Y	1	1	12	GAS1-N95TT	0	FALSE	0	0.99	FALSE	1
837	1795.84	12	GAS1-N95TT		1	VYAINTTLDHSECMK	VYAIN[837]TTLDHSEC[PPa]MK	2	Y	1	1	12	GAS1-N95TT	0	FALSE	0	0.99	FALSE	1
862	1795.84	12	GAS1-N95TT		1	VYAINTTLDHSECMK	VYAIN[862]TTLDHSEC[PPa]MK	2	Y	1	1	12	GAS1-N95TT	0	FALSE	0	0.99	FALSE	1
887	1795.84	12	GAS1-N95TT		1	VYAINTTLDHSECMK	VYAIN[887]TTLDHSEC[PPa]MK	2	Y	1	1	12	GAS1-N95TT	0	FALSE	0	0.99	FALSE	1
912	1795.84	12	GAS1-N95TT		1	VYAINTTLDHSECMK	VYAIN[912]TTLDHSEC[PPa]MK	2	Y	1	1	12	GAS1-N95TT	0	FALSE	0	0.99	FALSE	1
937	1795.84	12	GAS1-N95TT		1	VYAINTTLDHSECMK	VYAIN[937]TTLDHSEC[PPa]MK	2	Y	1	1	12	GAS1-N95TT	0	FALSE	0	0.99	FALSE	1
962	1795.84	12	GAS1-N95TT		1	VYAINTTLDHSECMK	VYAIN[962]TTLDHSEC[PPa]MK	2	Y	1	1	12	GAS1-N95TT	0	FALSE	0	0.99	FALSE	1
987	1795.84	12	GAS1-N95TT		1	VYAINTTLDHSECMK	VYAIN[987]TTLDHSEC[PPa]MK	2	Y	1	1	12	GAS1-N95TT	0	FALSE	0	0.99	FALSE	1
1012	1795.84	12	GAS1-N95TT		1	VYAINTTLDHSECMK	VYAIN[1012]TTLDHSEC[PPa]MK	2	Y	1	1	12	GAS1-N95TT	0	FALSE	0	0.99	FALSE	1
1037	1795.84	12	GAS1-N95TT		1	VYAINTTLDHSECMK	VYAIN[1037]TTLDHSEC[PPa]MK	2	Y	1	1	12	GAS1-N95TT	0	FALSE	0	0.99	FALSE	1
1062	1795.84	12	GAS1-N95TT		1	VYAINTTLDHSECMK	VYAIN[1062]TTLDHSEC[PPa]MK	2	Y	1	1	12	GAS1-N95TT	0	FALSE	0	0.99	FALSE	1
1087	1795.84	12	GAS1-N95TT		1	VYAINTTLDHSECMK	VYAIN[1087]TTLDHSEC[PPa]MK	2	Y	1	1	12	GAS1-N95TT	0	FALSE	0	0.99	FALSE	1
1112	1795.84	12	GAS1-N95TT		1	VYAINTTLDHSECMK	VYAIN[1112]TTLDHSEC[PPa]MK	2	Y	1	1	12	GAS1-N95TT	0	FALSE	0	0.99	FALSE	1
1137	1795.84	12	GAS1-N95TT		1	VYAINTTLDHSECMK	VYAIN[1137]TTLDHSEC[PPa]MK	2	Y	1	1	12	GAS1-N95TT	0	FALSE	0	0.99	FALSE	1
1162	1795.84	12	GAS1-N95TT		1	VYAINTTLDHSECMK	VYAIN[1162]TTLDHSEC[PPa]MK	2	Y	1	1	12	GAS1-N95TT	0	FALSE	0	0.99	FALSE	1
1187	1795.84	12	GAS1-N95TT		1	VYAINTTLDHSECMK	VYAIN[1187]TTLDHSEC[PPa]MK	2	Y	1	1	12	GAS1-N95TT	0	FALSE	0	0.99	FALSE	1
1212	1795.84	12	GAS1-N95TT		1	VYAINTTLDHSECMK	VYAIN[1212]TTLDHSEC[PPa]MK	2	Y	1	1	12	GAS1-N95TT	0	FALSE	0	0.99	FALSE	1
1237	1795.84	12	GAS1-N95TT		1	VYAINTTLDHSECMK	VYAIN[1237]TTLDHSEC[PPa]MK	2	Y	1	1	12	GAS1-N95TT	0	FALSE	0	0.99	FALSE	1
412.5	898.421	12	GAS1-N95TT		1	VYAINTTLDHSECMK	VYAIN[412]TTLDHSEC[PPa]MK	2	Y	2	1	12	GAS1-N95TT	0	FALSE	0	0.99	FALSE	1
437	898.421	12	GAS1-N95TT		1	VYAINTTLDHSECMK	VYAIN[437]TTLDHSEC[PPa]MK	2	Y	2	1	12	GAS1-N95TT	0	FALSE	0	0.99	FALSE	1
462	898.421	12	GAS1-N95TT		1	VYAINTTLDHSECMK	VYAIN[462]TTLDHSEC[PPa]MK	2	Y	2	1	12	GAS1-N95TT	0	FALSE	0	0.99	FALSE	1
487	898.421	12	GAS1-N95TT		1	VYAINTTLDHSECMK	VYAIN[487]TTLDHSEC[PPa]MK	2	Y	2	1	12	GAS1-N95TT	0	FALSE	0	0.99	FALSE	1
512	898.421	12	GAS1-N95TT		1	VYAINTTLDHSECMK	VYAIN[512]TTLDHSEC[PPa]MK	2	Y	2	1	12	GAS1-N95TT	0	FALSE	0	0.99	FALSE	1
537	898.421	12	GAS1-N95TT		1	VYAINTTLDHSECMK	VYAIN[537]TTLDHSEC[PPa]MK	2	Y	2	1	12	GAS1-N95TT	0	FALSE	0	0.99	FALSE	1
562	898.421	12	GAS1-N95TT		1	VYAINTTLDHSECMK	VYAIN[562]TTLDHSEC[PPa]MK	2	Y	2	1	12	GAS1-N95TT	0	FALSE	0	0.99	FALSE	1
587	898.421	12	GAS1-N95TT		1	VYAINTTLDHSECMK	VYAIN[587]TTLDHSEC[PPa]MK	2	Y	2	1	12	GAS1-N95TT	0	FALSE	0	0.99	FALSE	1
612	898.421	12	GAS1-N95TT		1	VYAINTTLDHSECMK	VYAIN[612]TTLDHSEC[PPa]MK	2	Y	2	1	12	GAS1-N95TT	0	FALSE	0	0.99	FALSE	1
637	898.421	12	GAS1-N95TT		1	VYAINTTLDHSECMK	VYAIN[637]TTLDHSEC[PPa]MK	2	Y	2	1	12	GAS1-N95TT	0	FALSE	0	0.99	FALSE	1
662	898.421	12	GAS1-N95TT		1	VYAINTTLDHSECMK	VYAIN[662]TTLDHSEC[PPa]MK	2	Y	2	1	12	GAS1-N95TT	0	FALSE	0	0.99	FALSE	1
687	898.421	12	GAS1-N95TT		1	VYAINTTLDHSECMK	VYAIN[687]TTLDHSEC[PPa]MK	2	Y	2	1	12	GAS1-N95TT	0	FALSE	0	0.99	FALSE	1
712	898.421	12	GAS1-N95TT		1	VYAINTTLDHSECMK	VYAIN[712]TTLDHSEC[PPa]MK	2	Y	2	1	12	GAS1-N95TT	0	FALSE	0	0.99	FALSE	1
737	898.421	12	GAS1-N95TT		1	VYAINTTLDHSECMK	VYAIN[737]TTLDHSEC[PPa]MK	2	Y	2	1	12	GAS1-N95TT	0	FALSE	0	0.99	FALSE	1
762	898.421	12	GAS1-N95TT		1	VYAINTTLDHSECMK	VYAIN[762]TTLDHSEC[PPa]MK	2	Y	2	1	12	GAS1-N95TT	0	FALSE	0	0.99	FALSE	1
787	898.421	12	GAS1-N95TT		1	VYAINTTLDHSECMK	VYAIN[787]TTLDHSEC[PPa]MK	2	Y	2	1	12	GAS1-N95TT	0	FALSE	0	0.99	FALSE	1
812	898.421	12	GAS1-N95TT		1	VYAINTTLDHSECMK	VYAIN[812]TTLDHSEC[PPa]MK	2	Y	2	1	12	GAS1-N95TT	0	FALSE	0	0.99	FALSE	1
837	898.421	12	GAS1-N95TT		1	VYAINTTLDHSECMK	VYAIN[837]TTLDHSEC[PPa]MK	2	Y	2	1	12	GAS1-N95TT	0	FALSE	0	0.99	FALSE	1
862	898.421	12	GAS1-N95TT		1	VYAINTTLDHSECMK	VYAIN[862]TTLDHSEC[PPa]MK	2	Y	2	1	12	GAS1-N95TT	0	FALSE	0	0.99	FALSE	1
887	898.421	12	GAS1-N95TT		1	VYAINTTLDHSECMK	VYAIN[887]TTLDHSEC[PPa]MK	2	Y	2	1	12	GAS1-N95TT	0	FALSE	0	0.99	FALSE	1
912	898.421	12	GAS1-N95TT		1	VYAINTTLDHSECMK	VYAIN[912]TTLDHSEC[PPa]MK	2	Y	2	1	12	GAS1-N95TT	0	FALSE	0	0.99	FALSE	1
937	898.421	12	GAS1-N95TT		1	VYAINTTLDHSECMK	VYAIN[937]TTLDHSEC[PPa]MK	2	Y	2	1	12	GAS1-N95TT	0	FALSE	0	0.99	FALSE	1
962	898.421	12	GAS1-N95TT		1	VYAINTTLDHSECMK	VYAIN[962]TTLDHSEC[PPa]MK	2	Y	2	1	12	GAS1-N95TT	0	FALSE	0	0.99	FALSE	1
987	898.421	12	GAS1-N95TT		1	VYAINTTLDHSECMK	VYAIN[987]TTLDHSEC[PPa]MK	2	Y	2	1	12	GAS1-N95TT	0	FALSE	0	0.99	FALSE	1
1012	898.421	12	GAS1-N95TT		1	VYAINTTLDHSECMK	VYAIN[1012]TTLDHSEC[PPa]MK	2	Y	2	1	12	GAS1-N95TT	0	FALSE	0	0.99	FALSE	1
1037	898.421	12	GAS1-N95TT		1	VYAINTTLDHSECMK	VYAIN[1037]TTLDHSEC[PPa]MK	2	Y	2	1	12	GAS1-N95TT	0	FALSE	0	0.99	FALSE	1
1062	898.421	12	GAS1-N95TT		1	VYAINTTLDHSECMK	VYAIN[1062]TTLDHSEC[PPa]MK	2	Y	2	1	12	GAS1-N95TT	0	FALSE	0	0.99	FALSE	1
1087	898.421	12	GAS1-N95TT		1	VYAINTTLDHSECMK	VYAIN[1087]TTLDHSEC[PPa]MK	2	Y	2	1	12	GAS1-N95TT	0	FALSE	0	0.99	FALSE	1
1112	898.421	12	GAS1-N95TT		1	VYAINTTLDHSECMK	VYAIN[1112]TTLDHSEC[PPa]MK	2	Y	2	1	12	GAS1-N95TT	0	FALSE	0	0.99	FALSE	1
1137	898.421	12	GAS1-N95TT		1	VYAINTTLDHSECMK	VYAIN[1137]TTLDHSEC[PPa]MK	2	Y	2	1	12	GAS1-N95TT	0	FALSE	0	0.99	FALSE	1
1162	898.421	12	GAS1-N95TT		1	VYAINTTLDHSECMK	VYAIN[1162]TTLDHSEC[PPa]MK	2	Y	2	1	12	GAS1-N95TT	0	FALSE	0	0.99	FALSE	1
1187	898.421	12	GAS1-N95TT		1	VYAINTTLDHSECMK	VYAIN[1187]TTLDHSEC[PPa]MK	2	Y	2	1	12	GAS1-N95TT	0	FALSE	0	0.99	FALSE	1
1212	898.421	12	GAS1-N95TT		1	VYAINTTLDHSECMK	VYAIN[1212]TTLDHSEC[PPa]MK	2	Y	2	1	12	GAS1-N95TT	0	FALSE	0	0.99	FALSE	1
1237	898.421	12	GAS1-N95TT		1	VYAINTTLDHSECMK	VYAIN[1237]TTLDHSEC[PPa]MK	2	Y	2	1	12	GAS1-N95TT	0	FALSE	0	0.99	FALSE	1
412.5	999.961	12	GAS1-N95TT		1	VYAINTTLDHSECMK	VYAIN[412]TTLDHSEC[PPa]MK	2	Y	2	2	12	GAS1-N95TT	0	FALSE	0	0.99	FALSE	1
437	999.961	12	GAS1-N95TT		1	VYAINTTLDHSECMK	VYAIN[437]TTLDHSEC[PPa]MK	2	Y	2	2	12	GAS1-N95TT	0	FALSE	0	0.99	FALSE	1
462	999.961	12	GAS1-N95TT		1	VYAINTTLDHSECMK	VYAIN[462]TTLDHSEC[PPa]MK	2	Y	2	2	12	GAS1-N95TT	0	FALSE	0	0.99	FALSE	1
487	999.961	12	GAS1-N95TT		1	VYAINTTLDHSECMK	VYAIN[487]TTLDHSEC[PPa]MK	2	Y	2	2	12	GAS1-N95TT	0	FALSE	0	0.99	FALSE	1
512	999.961	12	GAS1-N95TT		1	VYAINTTLDHSECMK	VYAIN[512]TTLDHSEC[PPa]MK	2	Y	2	2	12	GAS1-N95TT	0	FALSE	0	0.99	FALSE	1
537	999.961	12	GAS1-N95TT		1	VYAINTTLDHSECMK	VYAIN[537]TTLDHSEC[PPa]MK	2	Y	2	2	12	GAS1-N95TT	0	FALSE	0	0.99	FALSE	1
562	999.961	12	GAS1-N95TT		1	VYAINTTLDHSECMK	VYAIN[562]TTLDHSEC[PPa]MK	2	Y	2	2	12	GAS1-N95TT	0	FALSE	0	0.99	FALSE	1
587	999.961	12	GAS1-N95TT		1	VYAINTTLDHSECMK	VYAIN[587]TTLDHSEC[PPa]MK	2	Y	2	2	12	GAS1-N95TT	0	FALSE	0	0.99	FALSE	1
612	999.961	12	GAS1-N95TT		1	VYAINTTLDHSECMK	VYAIN[612]TTLDHSEC[PPa]MK	2	Y	2	2	12	GAS1-N95TT	0	FALSE	0	0.99	FALSE	1
637	999.961	12	GAS1-N95TT		1	VYAINTTLDHSECMK	VYAIN[637]TTLDHSEC[PPa]MK	2	Y	2	2	12	GAS1-N95TT	0	FALSE	0	0.99	FALSE	1
662	999.961	12	GAS1-N95TT		1	VYAINTTLDHSECMK	VYAIN[662]TTLDHSEC[PPa]MK	2	Y	2	2	12	GAS1-N95TT	0	FALSE	0	0.99	FALSE	1
687	999.961	12	GAS1-N95TT		1	VYAINTTLDHSECMK	VYAIN[687]TTLDHSEC[PPa]MK	2	Y	2	2	12	GAS1-N95TT	0	FALSE	0	0.99	FALSE	1
712	999.961	12	GAS1-N95TT		1	VYAINTTLDHSECMK	VYAIN[712]TTLDHSEC[PPa]MK	2	Y	2	2	12	GAS1-N95TT	0	FALSE	0	0.99	FALSE	1
737	999.961	12	GAS1-N95TT		1	VYAINTTLDHSECMK	VYAIN[737]TTLDHSEC[PPa]MK	2	Y	2	2	12	GAS1-N95TT	0	FALSE	0	0.99	FALSE	1
762	999.961	12	GAS1-N95TT		1	VYAINTTLDHSECMK	VYAIN[762]TTLDHSEC[PPa]MK	2	Y	2	2	12	GAS1-N95TT	0	FALSE	0	0.99	FALSE	1
787	999.961	12	GAS1-N95TT		1	VYAINTTLDHSECMK	VYAIN[787]TTLDHSEC[PPa]MK	2	Y	2	2	12	GAS1-N95TT	0	FALSE	0	0.99	FALSE	1
812	999.961	12	GAS1-N95TT		1	VYAINTTLDHSECMK	VYAIN[812]TTLDHSEC[PPa]MK	2	Y	2	2	12	GAS1-N95TT	0	FALSE	0	0.99	FALSE	1
837	999.961	12	GAS1-N95TT		1	VYAINTTLDHSECMK	VYAIN[837]TTLDHSEC[PPa]MK	2	Y	2	2	12	GAS1-N95TT	0	FALSE	0	0.99	FALSE	1
862	999.961	12	GAS1-N95TT		1	VYAINTTLDHSECMK	VYAIN[862]TTLDHSEC[PPa]MK	2	Y	2	2	12	GAS1-N95TT	0	FALSE	0	0.99	FALSE	1
887	999.961	12	GAS1-N95TT		1	VYAINTTLDHSECMK	VYAIN[887]TTLDHSEC[PPa]MK	2	Y	2	2	12	GAS1-N95TT	0	FALSE	0	0.99	FALSE	1
912	999.961	12	GAS1-N95TT		1	VYAINTTLDHSECMK	VYAIN[912]TTLDHSEC[PPa]MK	2	Y	2	2	12	GAS1-N95TT	0	FALSE	0	0.99	FALSE	1
937	999.961	12	GAS1-N95TT		1	VYAINTTLDHSECMK	VYAIN[937]TTLDHSEC[PPa]MK	2	Y	2	2	12	GAS1-N95TT	0	FALSE	0	0.99	FALSE	1
962	999.961	12	GAS1-N95TT		1	VYAINTTLDHSECMK	VYAIN[962]TTLDHSEC[PPa]MK	2	Y	2	2	12	GAS1-N95TT	0	FALSE	0	0.99	FALSE	1
987	999.961	12	GAS1-N95TT		1	VYAINTTLDHSECMK	VYAIN[987]TTLDHSEC[PPa]MK	2	Y	2	2	12	GAS1-N95TT	0	FALSE	0	0.99	FALSE	1
1012	999.961	12	GAS1-N95TT		1	VYAINTTLDHSECMK	VYAIN[1012]TTLDHSEC[PPa]MK	2	Y	2	2	12	GAS1-N95TT	0	FALSE	0	0.99	FALSE	1
1037	999.961	12	GAS1-N95TT		1	VYAINTTLDHSECMK	VYAIN[1037]TTLDHSEC[PPa]MK	2	Y	2	2	12	GAS1-N95TT	0	FALSE	0	0.99	FALSE	1
1062	999.961	12	GAS1-N95TT		1	VYAINTTLDHSECMK	VYAIN[1062]TTLDHSEC[PPa]MK	2	Y	2	2	12	GAS1-N95TT	0	FALSE	0	0.99	FALSE	1
1087	999.961	12	GAS1-N95TT		1	VYAINTTLDHSECMK	VYAIN[1087]TTLDHSEC[PPa]MK	2	Y	2	2	12	GAS1-N95TT	0	FALSE	0	0.99	FALSE	1
1112	999.961	12	GAS1-N95TT		1	VYAINTTLDHSECMK	VYAIN[1112]TTLDHSEC[PPa]MK	2	Y	2	2	12	GAS1-N95TT	0	FALSE	0	0.99	FALSE	1
1137	999.961	12	GAS1-N95TT		1	VYAINTTLDHSECMK	VYAIN[1137]TTLDHSEC[PPa]MK	2	Y	2	2	12	GAS1-N95TT	0	FALSE	0	0.99	FALSE	1
1162	999.961	12	GAS1-N95TT		1	VYAINTTLDHSECMK	VYAIN[1162]TTLDHSEC[PPa]MK	2	Y	2	2	12	GAS1-N95TT	0	FALSE	0	0.99	FALSE	1
1187	999.961	12	GAS1-N95TT		1	VYAINTTLDHSECMK	VYAIN[1187]TTLDHSEC[PPa]MK	2	Y	2	2	12	GAS1-N95TT	0	FALSE	0	0.99	FALSE	1
1212	999.961	12	GAS1-N95TT		1	VYAINTTLDHSECMK	VYAIN[1212]TTLDHSEC[PPa]MK	2	Y	2	2	12	GAS1-N95TT	0	FALSE	0	0.99	FALSE	1
1237	999.961	12	GAS1-N95TT		1	VYAINTTLDHSECMK	VYAIN[1237]TTLDHSEC[PPa]MK	2	Y	2	2	12	GAS1-N95TT	0	FALSE	0	0.99	FALSE	1
412.5	1101.5	12	GAS1-N95TT		1	VYAINTTLDHSECMK	VYAIN[412]TTLDHSEC[PPa]MK	2	Y	2	3	12	GAS1-N95TT	0	FALSE	0	0.99	FALSE	1
437	1101.5	12	GAS1-N95TT		1	VYAINTTLDHSECMK	VYAIN[437]TTLDHSEC[PPa]MK	2	Y	2	3	12	GAS1-N95TT	0	FALSE	0	0.99	FALSE	1
462	1101.5	12	GAS1-N95TT		1	VYAINTTLDHSECMK	VYAIN[462]TTLDHSEC[PPa]MK	2	Y	2	3	12	GAS1-N95TT	0	FALSE	0	0.99	FALSE	1
487	1101.5	12	GAS1-N95TT		1	VYAINTTLDHSECMK	VYAIN[487]TTLDHSEC[PPa]MK	2	Y	2	3	12	GAS1-N95TT	0	FALSE	0	0.99	FALSE	1
512	1101.5	12	GAS1-N95TT		1	VYAINTTLDHSECMK	VYAIN[512]TTLDHSEC[PPa]MK	2	Y	2	3	12	GAS1-N95TT	0	FALSE	0	0.99	FALSE	1
537	1101.5	12	GAS1-N95TT		1	VYAINTTLDHSECMK	VYAIN[537]TTLDHSEC[PPa]MK	2	Y	2	3	12	GAS1-N95TT	0	FALSE	0	0.99	FALSE	1
562	1101.5	12	GAS1-N95TT		1	VYAINTTLDHSECMK	VYAIN[562]TTLDHSEC[PPa]MK	2	Y	2	3	12	GAS1-N95TT	0	FALSE	0	0.99	FALSE	1
587	1101.5	12	GAS1-N95TT		1	VYAINTTLDHSECMK	VYAIN[587]TTLDHSEC[PPa]MK	2	Y	2	3	12	GAS1-N95TT	0	FALSE	0	0.99	FALSE	1
612	1101.5	12	GAS1-N95TT		1	VYAINTTLDHSECMK	VYAIN[612]TTLDHSEC[PPa]MK	2	Y	2	3	12	GAS1-N95TT	0	FALSE	0	0.99	FALSE	1
637	1101.5	12	GAS1-N95TT		1	VYAINTTLDHSECMK	VYAIN[637]TTLDHSEC[PPa]MK	2	Y	2	3	12	GAS1-N95TT	0	FALSE	0	0.99	FALSE	1
662	1101.5	12	GAS1-N95TT		1	VYAINTTLDHSECMK	VYAIN[662]TTLDHSEC[PPa]MK	2	Y	2	3	12	GAS1-N95TT	0	FALSE	0	0.99	FALSE	1
687	1101.5	12	GAS1-N95TT		1	VYAINTTLDHSECMK	VYAIN[687]TTLDHSEC[PPa]MK	2	Y	2	3	12	GAS1-N95TT	0	FALSE	0	0.99	FALSE	1
712	1101.5	12	GAS1-N95TT		1	VYAINTTLDHSECMK	VYAIN[712]TTLDHSEC[PPa]MK	2	Y	2	3	12	GAS1-N95TT	0	FALSE	0	0.99	FALSE	1
737	1101.5	12	GAS1-N95TT		1	VYAINTTLDHSECMK	VYAIN[737]TTLDHSEC[PPa]MK	2	Y	2	3	12	GAS1-N95TT	0	FALSE	0	0.99	FALSE	1
762	1101.5	12	GAS1-N95TT		1	VYAINTTLDHSECMK	VYAIN[762]TTLDHSEC[PPa]MK	2	Y	2	3	12	GAS1-N95TT	0	FALSE	0	0.99	FALSE	1
787	1101.5	12	GAS1-N95TT		1	VYAINTTLDHSECMK	VYAIN[787]TTLDHSEC[PPa]MK	2	Y	2	3	12	GAS1-N95TT	0	FALSE	0	0.99	FALSE	1
812	1101.5	12	GAS1-N95TT		1	VYAINTTLDHSECMK	VYAIN[812]TTLDHSEC[PPa]MK	2	Y	2	3	12	GAS1-N95TT	0	FALSE	0	0.99	FALSE	1
837	1101.5	12	GAS1-N95TT		1	VYAINTTLDHSECMK	VYAIN[837]TTLDHSEC[PPa]MK	2	Y	2	3	12	GAS1-N95TT	0	FALSE	0	0.99	FALSE	1
862	1101.5	12	GAS1-N95TT		1	VYAINTTLDHSECMK	VYAIN[862]TTLDHSEC[PPa]MK	2	Y	2	3	12	GAS1-N95TT	0	FALSE	0	0.99	FALSE	1
887	1101.5	12	GAS1-N95TT		1	VYAINTTLDHSECMK	VYAIN[887]TTLDHSEC[PPa]MK	2	Y	2	3	12	GAS1-N95TT	0	FALSE	0	0.99	FALSE	1
912	1101.5	12	GAS1-N95TT		1	VYAINTTLDHSECMK	VYAIN[912]TTLDHSEC[PPa]MK	2	Y	2	3	12	GAS1-N95TT	0	FALSE	0	0.99	FALSE	1
937	1101.5	12	GAS1-N95TT		1	VYAINTTLDHSECMK	VYAIN[937]TTLDHSEC[PPa]MK	2	Y	2	3	12	GAS1-N95TT	0	FALSE	0	0.99	FALSE	1
962	1101.5	12	GAS1-N95TT		1	VYAINTTLDHSECMK	VYAIN[962]TTLDHSEC[PPa]MK	2	Y	2	3	12	GAS1-N95TT	0	FALSE	0	0.99	FALSE	1
987	1101.5	12	GAS1-N95TT		1	VYAINTTLDHSECMK	VYAIN[987]TTLDHSEC[PPa]MK	2	Y	2	3	12	GAS1-N95TT	0	FALSE	0	0.99	FALSE	1
1012	1101.5	12	GAS1-N95TT		1	VYAINTTLDHSECMK	VYAIN[1012]TTLDHSEC[PPa]MK	2	Y	2	3	12	GAS1-N95TT	0	FALSE	0	0.99	FALSE	1
1037	1101.5	12	GAS1-N95TT		1	VYAINTTLDHSECMK	VYAIN[1037]TTLDHSEC[PPa]MK	2	Y	2	3	12	GAS1-N95TT	0	FALSE	0	0.99	FALSE	1
1062	1101.5	12	GAS1-N95TT		1	VYAINTTLDHSECMK	VYAIN[1062]TTLDHSEC[PPa]MK	2	Y	2	3	12	GAS1-N95TT	0	FALSE	0	0.99	FALSE	1
1087	1101.5	12	GAS1-N95TT		1	VYAINTTLDHSECMK	VYAIN[1087]TTLDHSEC[PPa]MK	2	Y	2	3	12	GAS1-N95TT	0	FALSE	0	0.99	FALSE	1
1112	1101.5	12	GAS1-N95TT		1	VYAINTTLDHSECMK	VYAIN[1112]TTLDHSEC[PPa]MK	2	Y	2	3	12	GAS1-N95TT	0	FALSE	0	0.99	FALSE	1
1137	1101.5	12	GAS1-N95TT		1	VYAINTTLDHSECMK	VYAIN[1137]TTLDHSEC[PPa]MK	2	Y	2	3	12	GAS1-N95TT	0	FALSE	0	0.99	FALSE	1
1162	1101.5	12	GAS1-N95TT		1	VYAINTTLDHSECMK	VYAIN[1162]TTLDHSEC[PPa]MK	2	Y	2	3	12	GAS1-N95TT	0	FALSE	0	0.99	FALSE	1
1187	1101.5	12	GAS1-N95TT		1	VYAINTTLDHSECMK	VYAIN[1187]TTLDHSEC[PPa]MK	2	Y	2	3	12	GAS1-N95TT	0	FALSE	0	0.99	FALSE	1
1212	1101.5	12	GAS1-N95TT		1	VYAINTTLDHSECMK	VYAIN[1212]TTLDHSEC[PPa]MK	2	Y	2	3	12	GAS1-N95TT	0	FALSE	0	0.99	FALSE	1
1237	1101.5	12	GAS1-N95TT		1	VYAINTTLDHSECMK	VYAIN[1237]TTLDHSEC[PPa]MK	2	Y	2	3	12	GAS1-N95TT	0	FALSE	0	0.99	FALSE	1
412.5	1122.04	12	GAS1-N253LS		1	NLSIPVFFSEYGCNEVTPR	N[412]LSIPVFFSEYGC[PPa]NEVTPR	2	Y	2	1	12	GAS1-N253LS	0	FALSE	0	0.99	FALSE	1
437	1122.04	12	GAS1-N253LS		1	NLSIPVFFSEYGCNEVTPR	N[437]LSIPVFFSEYGC[PPa]NEVTPR	2	Y	2	1	12	GAS1-N253LS	0	FALSE	0	0.99	FALSE	1
462	1122.04	12	GAS1-N253LS		1	NLSIPVFFSEYGCNEVTPR	N[462]LSIPVFFSEYGC[PPa]NEVTPR	2	Y	2	1	12	GAS1-N253LS	0	FALSE	0	0.99	FALSE	1
487	1122.04	12	GAS1-N253LS		1	NLSIPVFFSEYGCNEVTPR	N[487]LSIPVFFSEYGC[PPa]NEVTPR	2	Y	2	1	12	GAS1-N253LS	0	FALSE	0	0.99	FALSE	1
512	1122.04	12	GAS1-N253LS		1	NLSIPVFFSEYGCNEVTPR	N[512]LSIPVFFSEYGC[PPa]NEVTPR	2	Y	2	1	12	GAS1-N253LS	0	FALSE	0	0.99	FALSE	1
537	1122.04	12	GAS1-N253LS		1	NLSIPVFFSEYGCNEVTPR	N[537]LSIPVFFSEYGC[PPa]NEVTPR	2	Y	2	1	12	GAS1-N253LS	0	FALSE	0	0.99	FALSE	1
562	1122.04	12	GAS1-N253LS		1	NLSIPVFFSEYGCNEVTPR	N[562]LSIPVFFSEYGC[PPa]NEVTPR	2	Y	2	1	12	GAS1-N253LS	0	FALSE	0	0.99	FALSE	1
587	1122.04	12	GAS1-N253LS		1	NLSIPVFFSEYGCNEVTPR	N[587]LSIPVFFSEYGC[PPa]NEVTPR	2	Y	2	1	12	GAS1-N253LS	0	FALSE	0	0.99	FALSE	1
612	1122.04	12	GAS1-N253LS		1	NLSIPVFFSEYGCNEVTPR	N[612]LSIPVFFSEYGC[PPa]NEVTPR	2	Y	2	1	12	GAS1-N253LS	0	FALSE	0	0.99	FALSE	1
637	1122.04	12	GAS1-N253LS		1	NLSIPVFFSEYGCNEVTPR	N[637]LSIPVFFSEYGC[PPa]NEVTPR	2	Y	2	1	12	GAS1-N253LS	0	FALSE	0	0.99	FALSE	1
662	1122.04	12	GAS1-N253LS		1	NLSIPVFFSEYGCNEVTPR	N[662]LSIPVFFSEYGC[PPa]NEVTPR	2	Y	2	1	12	GAS1-N253LS	0	FALSE	0	0.99	FALSE	1
687	1122.04	12	GAS1-N253LS		1	NLSIPVFFSEYGCNEVTPR	N[687]LSIPVFFSEYGC[PPa]NEVTPR	2	Y	2	1	12	GAS1-N253LS	0	FALSE	0	0.99	FALSE	1
712	1122.04	12	GAS1-N253LS		1	NLSIPVFFSEYGCNEVTPR	N[712]LSIPVFFSEYGC[PPa]NEVTPR	2	Y	2	1	12	GAS1-N253LS	0	FALSE	0	0.99	FALSE	1
737	1122.04	12	GAS1-N253LS		1	NLSIPVFFSEYGCNEVTPR	N[737]LSIPVFFSEYGC[PPa]NEVTPR	2	Y	2	1	12	GAS1-N253LS	0	FALSE	0	0.99	FALSE	1
762	1122.04	12	GAS1-N253LS		1	NLSIPVFFSEYGCNEVTPR	N[762]LSIPVFFSEYGC[PPa]NEVTPR	2	Y	2	1	12	GAS1-N253LS	0	FALSE	0	0.99	FALSE	1
787	1122.04	12	GAS1-N253LS		1	NLSIPVFFSEYGCNEVTPR	N[787]LSIPVFFSEYGC[PPa]NEVTPR	2	Y	2	1	12	GAS1-N253LS	0	FALSE	0	0.99	FALSE	1
812	1122.04	12	GAS1-N253LS		1	NLSIPVFFSEYGCNEVTPR	N[812]LSIPVFFSEYGC[PPa]NEVTPR	2	Y	2	1	12	GAS1-N253LS	0	FALSE	0	0.99	FALSE	1
837	1122.04	12	GAS1-N253LS		1	NLSIPVFFSEYGCNEVTPR	N[837]LSIPVFFSEYGC[PPa]NEVTPR	2	Y	2	1	12	GAS1-N253LS	0	FALSE	0	0.99	FALSE	1
862	1122.04	12	GAS1-N253LS		1	NLSIPVFFSEYGCNEVTPR	N[862]LSIPVFFSEYGC[PPa]NEVTPR	2	Y	2	1	12	GAS1-N253LS	0	FALSE	0	0.99	FALSE	1
887	1122.04	12	GAS1-N253LS		1	NLSIPVFFSEYGCNEVTPR	N[887]LSIPVFFSEYGC[PPa]NEVTPR	2	Y	2	1	12	GAS1-N253LS	0	FALSE	0	0.99	FALSE	1
912	1122.04	12	GAS1-N253LS		1	NLSIPVFFSEYGCNEVTPR	N[912]LSIPVFFSEYGC[PPa]NEVTPR	2	Y	2	1	12	GAS1-N253LS	0	FALSE	0	0.99	FALSE	1
937	1122.04	12	GAS1-N253LS		1	NLSIPVFFSEYGCNEVTPR	N[937]LSIPVFFSEYGC[PPa]NEVTPR	2	Y	2	1	12	GAS1-N253LS	0	FALSE	0	0.99	FALSE	1
962	1122.04	12	GAS1-N253LS		1	NLSIPVFFSEYGCNEVTPR	N[962]LSIPVFFSEYGC[PPa]NEVTPR	2	Y	2	1	12	GAS1-N253LS	0	FALSE	0	0.99	FALSE	1
987	1122.04	12	GAS1-N253LS		1	NLSIPVFFSEYGCNEVTPR	N[987]LSIPVFFSEYGC[PPa]NEVTPR	2	Y	2	1	12	GAS1-N253LS	0	FALSE	0	0.99	FALSE	1
1012	1122.04	12	GAS1-N253LS		1	NLSIPVFFSEYGCNEVTPR	N[1012]LSIPVFFSEYGC[PPa]NEVTPR	2	Y	2	1	12	GAS1-N253LS	0	FALSE	0	0.99	FALSE	1
1037	1122.04	12	GAS1-N253LS		1	NLSIPVFFSEYGCNEVTPR	N[1037]LSIPVFFSEYGC[PPa]NEVTPR	2	Y	2	1	12	GAS1-N253LS	0	FALSE	0	0.99	FALSE	1
1062	1122.04	12	GAS1-N253LS		1	NLSIPVFFSEYGCNEVTPR	N[1062]LSIPVFFSEYGC[PPa]NEVTPR	2	Y	2	1	12	GAS1-N253LS	0	FALSE	0	0.99	FALSE	1
1087	1122.04	12	GAS1-N253LS		1	NLSIPVFFSEYGCNEVTPR	N[1087]LSIPVFFSEYGC[PPa]NEVTPR	2	Y	2	1	12	GAS1-N253LS	0	FALSE	0	0.99	FALSE	1
1112	1122.04	12	GAS1-N253LS		1	NLSIPVFFSEYGCNEVTPR	N[1112]LSIPVFFSEYGC[PPa]NEVTPR	2	Y	2	1	12	GAS1-N253LS	0	FALSE	0	0.99	FALSE	1
1137	1122.04	12	GAS1-N253LS		1	NLSIPVFFSEYGCNEVTPR	N[1137]LSIPVFFSEYGC[PPa]NEVTPR	2	Y	2	1	12	GAS1-N253LS	0	FALSE	0	0.99	FALSE	1
1162	1122.04	12	GAS1-N253LS		1	NLSIPVFFSEYGCNEVTPR	N[1162]LSIPVFFSEYGC[PPa]NEVTPR	2	Y	2	1	12	GAS1-N253LS	0	FALSE	0	0.99	FALSE	1
1187	1122.04	12	GAS1-N253LS		1	NLSIPVFFSEYGCNEVTPR	N[1187]LSIPVFFSEYGC[PPa]NEVTPR	2	Y	2	1	12	GAS1-N253LS	0	FALSE	0	0.99	FALSE	1
1212	1122.04	12	GAS1-N253LS		1	NLSIPVFFSEYGCNEVTPR	N[1212]LSIPVFFSEYGC[PPa]NEVTPR	2	Y	2	1	12	GAS1-N253LS	0	FALSE	0	0.99	FALSE	1
1237	1122.04	12	GAS1-N253LS		1	NLSIPVFFSEYGCNEVTPR	N[1237]LSIPVFFSEYGC[PPa]NEVTPR	2	Y	2	1	12	GAS1-N253LS	0	FALSE	0	0.99	FALSE	1
412.5	1223.58	12	GAS1-N253LS		1	NLSIPVFFSEYGCNEVTPR	N[412]LSIPVFFSEYGC[PPa]NEVTPR	2	Y	2	2	12	GAS1-N253LS	0	FALSE	0	0.99	FALSE	1
437	1223.58	12	GAS1-N253LS		1	NLSIPVFFSEYGCNEVTPR	N[437]LSIPVFFSEYGC[PPa]NEVTPR	2	Y	2	2	12	GAS1-N253LS	0	FALSE	0	0.99	FALSE	1
462	1223.58	12	GAS1-N253LS		1	NLSIPVFFSEYGCNEVTPR	N[462]LSIPVFFSEYGC[PPa]NEVTPR	2	Y	2	2	12	GAS1-N253LS	0	FALSE	0	0.99	FALSE	1
487	1223.58	12	GAS1-N253LS		1	NLSIPVFFSEYGCNEVTPR	N[487]LSIPVFFSEYGC[PPa]NEVTPR	2	Y	2	2	12	GAS1-N253LS	0	FALSE	0	0.99	FALSE	1
512	1223.58	12	GAS1-N253LS		1	NLSIPVFFSEYGCNEVTPR	N[512]LSIPVFFSEYGC[PPa]NEVTPR	2	Y	2	2	12	GAS1-N253LS	0	FALSE	0	0.99	FALSE	1
537	1223.58	12	GAS1-N253LS		1	NLSIPVFFSEYGCNEVTPR	N[537]LSIPVFFSEYGC[PPa]NEVTPR	2	Y	2	2	12	GAS1-N253LS	0	FALSE	0	0.99	FALSE	1
562	1223.58	12	GAS1-N253LS		1	NLSIPVFFSEYGCNEVTPR	N[562]LSIPVFFSEYGC[PPa]NEVTPR	2	Y	2	2	12	GAS1-N253LS	0	FALSE	0	0.99	FALSE	1
587	1223.58	12	GAS1-N253LS		1	NLSIPVFFSEYGCNEVTPR	N[587]LSIPVFFSEYGC[PPa]NEVTPR	2	Y	2	2	12	GAS1-N253LS	0	FALSE	0	0.99	FALSE	1
612	1223.58	12	GAS1-N253LS		1	NLSIPVFFSEYGCNEVTPR	N[612]LSIPVFFSEYGC[PPa]NEVTPR	2	Y	2	2	12	GAS1-N253LS	0	FALSE	0	0.99	FALSE	1
637	1223.58	12	GAS1-N253LS		1	NLSIPVFFSEYGCNEVTPR	N[637]LSIPVFFSEYGC[PPa]NEVTPR	2	Y	2	2	12	GAS1-N253LS	0	FALSE	0	0.99	FALSE	1
662	1223.58	12	GAS1-N253LS		1	NLSIPVFFSEYGCNEVTPR	N[662]LSIPVFFSEYGC[PPa]NEVTPR	2	Y	2	2	12	GAS1-N253LS	0	FALSE	0	0.99	FALSE	1
687	1223.58	12	GAS1-N253LS		1	NLSIPVFFSEYGCNEVTPR	N[687]LSIPVFFSEYGC[PPa]NEVTPR	2	Y	2	2	12	GAS1-N253LS	0	FALSE	0	0.99	FALSE	1
712	1223.58	12	GAS1-N253LS		1	NLSIPVFFSEYGCNEVTPR	N[712]LSIPVFFSEYGC[PPa]NEVTPR	2	Y	2	2	12	GAS1-N253LS	0	FALSE	0	0.99	FALSE	1
737	1223.58	12	GAS1-N253LS		1	NLSIPVFFSEYGCNEVTPR	N[737]LSIPVFFSEYGC[PPa]NEVTPR	2	Y	2	2	12	GAS1-N253LS	0	FALSE	0	0.99	FALSE	1
762	1223.58	12	GAS1-N253LS		1	NLSIPVFFSEYGCNEVTPR	N[762]LSIPVFFSEYGC[PPa]NEVTPR	2	Y	2	2	12	GAS1-N253LS	0	FALSE	0	0.99	FALSE	1
787	1223.58	12	GAS1-N253LS		1	NLSIPVFFSEYGCNEVTPR	N[787]LSIPVFFSEYGC[PPa]NEVTPR	2	Y	2	2	12	GAS1-N253LS	0	FALSE	0	0.99	FALSE	1
812	1223.58	12	GAS1-N253LS		1	NLSIPVFFSEYGCNEVTPR	N[812]LSIPVFFSEYGC[PPa]NEVTPR	2	Y	2	2	12	GAS1-N253LS	0	FALSE	0	0.99	FALSE	1
837	1223.58	12	GAS1-N253LS		1	NLSIPVFFSEYGCNEVTPR	N[837]LSIPVFFSEYGC[PPa]NEVTPR	2	Y	2	2	12	GAS1-N253LS	0	FALSE	0	0.99	FALSE	1
862	1223.58	12	GAS1-N253LS		1	NLSIPVFFSEYGCNEVTPR	N[862]LSIPVFFSEYGC[PPa]NEVTPR	2	Y	2	2	12	GAS1-N253LS	0	FALSE	0	0.99	FALSE	1
887	1223.58	12	GAS1-N253LS		1	NLSIPVFFSEYGCNEVTPR	N[887]LSIPVFFSEYGC[PPa]NEVTPR	2	Y	2	2	12	GAS1-N253LS	0	FALSE	0	0.99	FALSE	1
912	1223.58	12	GAS1-N253LS		1	NLSIPVFFSEYGCNEVTPR	N[912]LSIPVFFSEYGC[PPa]NEVTPR	2	Y	2	2	12	GAS1-N253LS	0	FALSE	0	0.99	FALSE	1
937	1223.58	12	GAS1-N253LS		1	NLSIPVFFSEYGCNEVTPR	N[937]LSIPVFFSEYGC[PPa]NEVTPR	2	Y	2	2	12	GAS1-N253LS	0	FALSE	0	0.99	FALSE	1
962	1223.58	12	GAS1-N253LS		1	NLSIPVFFSEYGCNEVTPR	N[962]LSIPVFFSEYGC[PPa]NEVTPR	2	Y	2	2	12	GAS1-N253LS	0	FALSE	0	0.99	FALSE	1
987	1223.58	12	GAS1-N253LS		1	NLSIPVFFSEYGCNEVTPR	N[987]LSIPVFFSEYGC[PPa]NEVTPR	2	Y	2	2	12	GAS1-N253LS	0	FALSE	0	0.99	FALSE	1
1012	1223.58	12	GAS1-N253LS		1	NLSIPVFFSEYGCNEVTPR	N[1012]LSIPVFFSEYGC[PPa]NEVTPR	2	Y	2	2	12	GAS1-N253LS	0	FALSE	0	0.99	FALSE	1
1037	1223.58	12	GAS1-N253LS		1	NLSIPVFFSEYGCNEVTPR	N[1037]LSIPVFFSEYGC[PPa]NEVTPR	2	Y	2	2	12	GAS1-N253LS	0	FALSE	0	0.99	FALSE	1
1062	1223.58	12	GAS1-N253LS		1	NLSIPVFFSEYGCNEVTPR	N[1062]LSIPVFFSEYGC[PPa]NEVTPR	2	Y	2	2	12	GAS1-N253LS	0	FALSE	0	0.99	FALSE	1
1087	1223.58	12	GAS1-N253LS		1	NLSIPVFFSEYGCNEVTPR	N[1087]LSIPVFFSEYGC[PPa]NEVTPR	2	Y	2	2	12	GAS1-N253LS	0	FALSE	0	0.99	FALSE	1
1112	1223.58	12	GAS1-N253LS		1	NLSIPVFFSEYGCNEVTPR	N[1112]LSIPVFFSEYGC[PPa]NEVTPR	2	Y	2	2	12	GAS1-N253LS	0	FALSE	0	0.99	FALSE	1
1137	1223.58	12	GAS1-N253LS		1	NLSIPVFFSEYGCNEVTPR	N[1137]LSIPVFFSEYGC[PPa]NEVTPR	2	Y	2	2	12	GAS1-N253LS	0	FALSE	0	0.99	FALSE	1
1162	1223.58	12	GAS1-N253LS		1	NLSIPVFFSEYGCNEVTPR	N[1162]LSIPVFFSEYGC[PPa]NEVTPR	2	Y	2	2	12	GAS1-N253LS	0	FALSE	0	0.99	FALSE	1
1187	1223.58	12	GAS1-N253LS		1	NLSIPVFFSEYGCNEVTPR	N[1187]LSIPVFFSEYGC[PPa]NEVTPR	2	Y	2	2	12	GAS1-N253LS	0	FALSE	0	0.99	FALSE	1
1212	1223.58	12	GAS1-N253LS		1	NLSIPVFFSEYGCNEVTPR	N[1212]LSIPVFFSEYGC[PPa]NEVTPR	2	Y	2	2	12	GAS1-N253LS	0	FALSE	0	0.99	FALSE	1
1237	1223.58	12	GAS1-N253LS		1	NLSIPVFFSEYGCNEVTPR	N[1237]LSIPVFFSEYGC[PPa]NEVTPR	2	Y	2	2	12	GAS1-N253LS	0	FALSE	0	0.99	FALSE	1
412.5	1325.12	12	GAS1-N253LS		1	NLSIPVFFSEYGCNEVTPR	N[412]LSIPVFFSEYGC[PPa]NEVTPR	2	Y	2	3	12	GAS1-N253LS	0	FALSE	0	0.99	FALSE	1
437	1325.12	12	GAS1-N253LS		1	NLSIPVFFSEYGCNEVTPR	N[437]LSIPVFFSEYGC[PPa]NEVTPR	2	Y	2	3	12	GAS1-N253LS	0	FALSE	0	0.99	FALSE	1
462	1325.12	12	GAS1-N253LS		1	NLSIPVFFSEYGCNEVTPR	N[462]LSIPVFFSEYGC[PPa]NEVTPR	2	Y	2	3	12	GAS1-N253LS	0	FALSE	0	0.99	FALSE	1
487	1325.12	12	GAS1-N253LS		1	NLSIPVFFSEYGCNEVTPR	N[487]LSIPVFFSEYGC[PPa]NEVTPR	2	Y	2	3	12	GAS1-N253LS	0	FALSE	0	0.99	FALSE	1
512	1325.12	12	GAS1-N253LS		1	NLSIPVFFSEYGCNEVTPR	N[512]LSIPVFFSEYGC[PPa]NEVTPR	2	Y	2	3	12	GAS1-N253LS	0	FALSE	0	0.99	FALSE	1
537	1325.12	12	GAS1-N253LS		1	NLSIPVFFSEYGCNEVTPR	N[537]LSIPVFFSEYGC[PPa]NEVTPR	2	Y	2	3	12	GAS1-N253LS	0	FALSE	0	0.99	FALSE	1
562	1325.12	12	GAS1-N253LS		1	NLSIPVFFSEYGCNEVTPR	N[562]LSIPVFFSEYGC[PPa]NEVTPR	2	Y	2	3	12	GAS1-N253LS	0	FALSE	0	0.99	FALSE	1
587	1325.12	12	GAS1-N253LS		1	NLSIPVFFSEYGCNEVTPR	N[587]LSIPVFFSEYGC[PPa]NEVTPR	2	Y	2	3	12	GAS1-N253LS	0	FALSE	0	0.99	FALSE	1
612	1325.12	12	GAS1-N253LS		1	NLSIPVFFSEYGCNEVTPR	N[612]LSIPVFFSEYGC[PPa]NEVTPR	2	Y	2	3	12	GAS1-N253LS	0	FALSE	0	0.99	FALSE	1
637	1325.12	12	GAS1-N253LS		1	NLSIPVFFSEYGCNEVTPR	N[637]LSIPVFFSEYGC[PPa]NEVTPR	2	Y	2	3	12	GAS1-N253LS	0	FALSE	0	0.99	FALSE	1
662	1325.12	12	GAS1-N253LS		1	NLSIPVFFSEYGCNEVTPR	N[662]LSIPVFFSEYGC[PPa]NEVTPR	2	Y	2	3	12	GAS1-N253LS	0	FALSE	0	0.99	FALSE	1
687	1325.12	12	GAS1-N253LS		1	NLSIPVFFSEYGCNEVTPR	N[687]LSIPVFFSEYGC[PPa]NEVTPR	2	Y	2	3	12	GAS1-N253LS	0	FALSE	0	0.99	FALSE	1
712	1325.12	12	GAS1-N253LS		1	NLSIPVFFSEYGCNEVTPR	N[712]LSIPVFFSEYGC[PPa]NEVTPR	2	Y	2	3	12	GAS1-N253LS	0	FALSE	0	0.99	FALSE	1
737	1325.12	12	GAS1-N253LS		1	NLSIPVFFSEYGCNEVTPR	N[737]LSIPVFFSEYGC[PPa]NEVTPR	2	Y	2	3	12	GAS1-N253LS	0	FALSE	0	0.99	FALSE	1
762	1325.12	12	GAS1-N253LS		1	NLSIPVFFSEYGCNEVTPR	N[762]LSIPVFFSEYGC[PPa]NEVTPR	2	Y	2	3	12	GAS1-N253LS	0	FALSE	0	0.99	FALSE	1
787	1325.12	12	GAS1-N253LS		1	NLSIPVFFSEYGCNEVTPR	N[787]LSIPVFFSEYGC[PPa]NEVTPR	2	Y	2	3	12	GAS1-N253LS	0	FALSE	0	0.99	FALSE	1
812	1325.12	12	GAS1-N253LS		1	NLSIPVFFSEYGCNEVTPR	N[812]LSIPVFFSEYGC[PPa]NEVTPR	2	Y	2	3	12	GAS1-N253LS	0	FALSE	0	0.99	FALSE	1
837	1325.12	12	GAS1-N253LS		1	NLSIPVFFSEYGCNEVTPR	N[837]LSIPVFFSEYGC[PPa]NEVTPR	2	Y	2	3	12	GAS1-N253LS	0	FALSE	0	0.99	FALSE	1
862	1325.12	12	GAS1-N253LS		1	NLSIPVFFSEYGCNEVTPR	N[862]LSIPVFFSEYGC[PPa]NEVTPR	2	Y	2	3	12	GAS1-N253LS	0	FALSE	0	0.99	FALSE	1
887	1325.12	12	GAS1-N253LS		1	NLSIPVFFSEYGCNEVTPR	N[887]LSIPVFFSEYGC[PPa]NEVTPR	2	Y	2	3	12	GAS1-N253LS	0	FALSE	0	0.99	FALSE	1
912	1325.12	12	GAS1-N253LS		1	NLSIPVFFSEYGCNEVTPR	N[912]LSIPVFFSEYGC[PPa]NEVTPR	2	Y	2	3	12	GAS1-N253LS	0	FALSE	0	0.99	FALSE	1
937	1325.12	12	GAS1-N253LS		1	NLSIPVFFSEYGCNEVTPR	N[937]LSIPVFFSEYGC[PPa]NEVTPR	2	Y	2	3	12	GAS1-N253LS	0	FALSE	0	0.99	FALSE	1
962	1325.12	12	GAS1-N253LS		1	NLSIPVFFSEYGCNEVTPR	N[962]LSIPVFFSEYGC[PPa]NEVTPR	2	Y	2	3	12	GAS1-N253LS	0	FALSE	0	0.99	FALSE	1
987	1325.12	12	GAS1-N253LS		1	NLSIPVFFSEYGCNEVTPR	N[987]LSIPVFFSEYGC[PPa]NEVTPR	2	Y	2	3	12	GAS1-N253LS	0	FALSE	0	0.99	FALSE	1
1012	1325.12	12	GAS1-N253LS		1	NLSIPVFFSEYGCNEVTPR	N[1012]LSIPVFFSEYGC[PPa]NEVTPR	2	Y	2	3	12	GAS1-N253LS	0	FALSE	0	0.99	FALSE	1
1037	1325.12	12	GAS1-N253LS		1	NLSIPVFFSEYGCNEVTPR	N[1037]LSIPVFFSEYGC[PPa]NEVTPR	2	Y	2	3	12	GAS1-N253LS	0	FALSE	0	0.99	FALSE	1
1062	1325.12	12	GAS1-N253LS		1	NLSIPVFFSEYGCNEVTPR	N[1062]LSIPVFFSEYGC[PPa]NEVTPR	2	Y	2	3	12	GAS1-N253LS	0	FALSE	0	0.99	FALSE	1
1087	1325.12	12	GAS1-N253LS		1	NLSIPVFFSEYGCNEVTPR	N[1087]LSIPVFFSEYGC[PPa]NEVTPR	2	Y	2	3	12	GAS1-N253LS	0	FALSE	0	0.99	FALSE	1
1112	1325.12	12	GAS1-N253LS		1	NLSIPVFFSEYGCNEVTPR	N[1112]LSIPVFFSEYGC[PPa]NEVTPR	2	Y	2	3	12	GAS1-N253LS	0	FALSE	0	0.99	FALSE	1
1137	1325.12	12	GAS1-N253LS		1	NLSIPVFFSEYGCNEVTPR	N[1137]LSIPVFFSEYGC[PPa]NEVTPR	2	Y	2	3	12	GAS1-N253LS	0	FALSE	0	0.99	FALSE	1
1162	1325.12	12	GAS1-N253LS		1	NLSIPVFFSEYGCNEVTPR	N[1162]LSIPVFFSEYGC[PPa]NEVTPR	2	Y	2	3	12	GAS1-N253LS	0	FALSE	0	0.99	FALSE	1
1187	1325.12	12	GAS1-N253LS		1	NLSIPVFFSEYGCNEVTPR	N[1187]LSIPVFFSEYGC[PPa]NEVTPR	2	Y	2	3	12	GAS1-N253LS	0	FALSE	0	0.99	FALSE	1
1212	1325.12	12	GAS1-N253LS		1	NLSIPVFFSEYGCNEVTPR	N[1212]LSIPVFFSEYGC[PPa]NEVTPR	2	Y	2	3	12	GAS1-N253LS	0	FALSE	0	0.99	FALSE	1
1237	1325.12	12	GAS1-N253LS		1	NLSIPVFFSEYGCNEVTPR	N[1237]LSIPVFFSEYGC[PPa]NEVTPR	2	Y	2	3	12	GAS1-N253LS	0	FALSE	0	0.99	FALSE	1
412.5	859.488	12	GAS3-N350VS		1	NVSLPTTK	N[412]VSLPTTK	2	Y	1	1	12	GAS3-N350VS	0	FALSE	0	0.99	FALSE	1
437	859.488	12	GAS3-N350VS		1	NVSLPTTK	N[437]VSLPTTK	2	Y	1	1	12	GAS3-N350VS	0	FALSE	0	0.99	FALSE	1
462	859.488	12	GAS3-N350VS		1	NVSLPTTK	N[462]VSLPTTK	2	Y	1	1	12	GAS3-N350VS	0	FALSE	0	0.99	FALSE	1
487	859.488	12	GAS3-N350VS		1	NVSLPTTK	N[487]VSLPTTK	2	Y	1	1	12	GAS3-N350VS	0	FALSE	0	0.99	FALSE	1
512	859.488	12	GAS3-N350VS		1	NVSLPTTK	N[512]VSLPTTK	2	Y	1	1	12	GAS3-N350VS	0	FALSE	0	0.99	FALSE	1
537	859.488	12	GAS3-N350VS		1	NVSLPTTK	N[537]VSLPTTK	2	Y	1	1	12	GAS3-N350VS	0	FALSE	0	0.99	FALSE	1
562	859.488	12	GAS3-N350VS		1	NVSLPTTK	N[562]VSLPTTK	2	Y	1	1	12	GAS3-N350VS	0	FALSE	0	0.99	FALSE	1
587	859.488	12	GAS3-N350VS		1	NVSLPTTK	N[587]VSLPTTK	2	Y	1	1	12	GAS3-N350VS	0	FALSE	0	0.99	FALSE	1
612	859.488	12	GAS3-N350VS		1	NVSLPTTK	N[612]VSLPTTK	2	Y	1	1	12	GAS3-N350VS	0	FALSE	0	0.99	FALSE	1
637	859.488	12	GAS3-N350VS		1	NVSLPTTK	N[637]VSLPTTK	2	Y	1	1	12	GAS3-N350VS	0	FALSE	0	0.99	FALSE	1
662	859.488	12	GAS3-N350VS		1	NVSLPTTK	N[662]VSLPTTK	2	Y	1	1	12	GAS3-N350VS	0	FALSE	0	0.99	FALSE	1
687	859.488	12	GAS3-N350VS		1	NVSLPTTK	N[687]VSLPTTK	2	Y	1	1	12	GAS3-N350VS	0	FALSE	0	0.99	FALSE	1
712	859.488	12	GAS3-N350VS		1	NVSLPTTK	N[712]VSLPTTK	2	Y	1	1	12	GAS3-N350VS	0	FALSE	0	0.99	FALSE	1
737	859.488	12	GAS3-N350VS		1	NVSLPTTK	N[737]VSLPTTK	2	Y	1	1	12	GAS3-N350VS	0	FALSE	0	0.99	FALSE	1
762	859.488	12	GAS3-N350VS		1	NVSLPTTK	N[762]VSLPTTK	2	Y	1	1	12	GAS3-N350VS	0	FALSE	0	0.99	FALSE	1
787	859.488	12	GAS3-N350VS		1	NVSLPTTK	N[787]VSLPTTK	2	Y	1	1	12	GAS3-N350VS	0	FALSE	0	0.99	FALSE	1
812	859.488	12	GAS3-N350VS		1	NVSLPTTK	N[812]VSLPTTK	2	Y	1	1	12	GAS3-N350VS	0	FALSE	0	0.99	FALSE	1
837	859.488	12	GAS3-N350VS		1	NVSLPTTK	N[837]VSLPTTK	2	Y	1	1	12	GAS3-N350VS	0	FALSE	0	0.99	FALSE	1
862	859.488	12	GAS3-N350VS		1	NVSLPTTK	N[862]VSLPTTK	2	Y	1	1	12	GAS3-N350VS	0	FALSE	0	0.99	FALSE	1
887	859.488	12	GAS3-N350VS		1	NVSLPTTK	N[887]VSLPTTK	2	Y	1	1	12	GAS3-N350VS	0	FALSE	0	0.99	FALSE	1
912	859.488	12	GAS3-N350VS		1	NVSLPTTK	N[912]VSLPTTK	2	Y	1	1	12	GAS3-N350VS	0	FALSE	0	0.99	FALSE	1
937	859.488	12	GAS3-N350VS		1	NVSLPTTK	N[937]VSLPTTK	2	Y	1	1	12	GAS3-N350VS	0	FALSE	0	0.99	FALSE	1
962	859.488	12	GAS3-N350VS		1	NVSLPTTK	N[962]VSLPTTK	2	Y	1	1	12	GAS3-N350VS	0	FALSE	0	0.99	FALSE	1
987	859.488	12	GAS3-N350VS		1	NVSLPTTK	N[987]VSLPTTK	2	Y	1	1	12	GAS3-N350VS	0	FALSE	0	0.99	FALSE	1
1012	859.488	12	GAS3-N350VS		1	NVSLPTTK	N[1012]VSLPTTK	2	Y	1	1	12	GAS3-N350VS	0	FALSE	0	0.99	FALSE	1
1037	859.488	12	GAS3-N350VS		1	NVSLPTTK	N[1037]VSLPTTK	2	Y	1	1	12	GAS3-N350VS	0	FALSE	0	0.99	FALSE	1
1062	859.488	12	GAS3-N350VS		1	NVSLPTTK	N[1062]VSLPTTK	2	Y	1	1	12	GAS3-N350VS	0	FALSE	0	0.99	FALSE	1
1087	859.488	12	GAS3-N350VS		1	NVSLPTTK	N[1087]VSLPTTK	2	Y	1	1	12	GAS3-N350VS	0	FALSE	0	0.99	FALSE	1
1112	859.488	12	GAS3-N350VS		1	NVSLPTTK	N[1112]VSLPTTK	2	Y	1	1	12	GAS3-N350VS	0	FALSE	0	0.99	FALSE	1
1137	859.488	12	GAS3-N350VS		1	NVSLPTTK	N[1137]VSLPTTK	2	Y	1	1	12	GAS3-N350VS	0	FALSE	0	0.99	FALSE	1
1162	859.488	12	GAS3-N350VS		1	NVSLPTTK	N[1162]VSLPTTK	2	Y	1	1	12	GAS3-N350VS	0	FALSE	0	0.99	FALSE	1
1187	859.488	12	GAS3-N350VS		1	NVSLPTTK	N[1187]VSLPTTK	2	Y	1	1	12	GAS3-N350VS	0	FALSE	0	0.99	FALSE	1
1212	859.488	12	GAS3-N350VS		1	NVSLPTTK	N[1212]VSLPTTK	2	Y	1	1	12	GAS3-N350VS	0	FALSE	0	0.99	FALSE	1
1237	859.488	12	GAS3-N350VS		1	NVSLPTTK	N[1237]VSLPTTK	2	Y	1	1	12	GAS3-N350VS	0	FALSE	0	0.99	FALSE	1
412.5	430.248	12	GAS3-N350VS		1	NVSLPTTK	N[412]VSLPTTK	2	Y	2	1	12	GAS3-N350VS	0	FALSE	0	0.99	FALSE	1
437	430.248	12	GAS3-N350VS		1	NVSLPTTK	N[437]VSLPTTK	2	Y	2	1	12	GAS3-N350VS	0	FALSE	0	0.99	FALSE	1
462	430.248	12	GAS3-N350VS		1	NVSLPTTK	N[462]VSLPTTK	2	Y	2	1	12	GAS3-N350VS	0	FALSE	0	0.99	FALSE	1
487	430.248	12	GAS3-N350VS		1	NVSLPTTK	N[487]VSLPTTK	2	Y	2	1	12	GAS3-N350VS	0	FALSE	0	0.99	FALSE	1
512	430.248	12	GAS3-N350VS		1	NVSLPTTK	N[512]VSLPTTK	2	Y	2	1	12	GAS3-N350VS	0	FALSE	0	0.99	FALSE	1
537	430.248	12	GAS3-N350VS		1	NVSLPTTK	N[537]VSLPTTK	2	Y	2	1	12	GAS3-N350VS	0	FALSE	0	0.99	FALSE	1
562	430.248	12	GAS3-N350VS		1	NVSLPTTK	N[562]VSLPTTK	2	Y	2	1	12	GAS3-N350VS	0	FALSE	0	0.99	FALSE	1
587	430.248	12	GAS3-N350VS		1	NVSLPTTK	N[587]VSLPTTK	2	Y	2	1	12	GAS3-N350VS	0	FALSE	0	0.99	FALSE	1
612	430.248	12	GAS3-N350VS		1	NVSLPTTK	N[612]VSLPTTK	2	Y	2	1	12	GAS3-N350VS	0	FALSE	0	0.99	FALSE	1
637	430.248	12	GAS3-N350VS		1	NVSLPTTK	N[637]VSLPTTK	2	Y	2	1	12	GAS3-N350VS	0	FALSE	0	0.99	FALSE	1
662	430.248	12	GAS3-N350VS		1	NVSLPTTK	N[662]VSLPTTK	2	Y	2	1	12	GAS3-N350VS	0	FALSE	0	0.99	FALSE	1
687	430.248	12	GAS3-N350VS		1	NVSLPTTK	N[687]VSLPTTK	2	Y	2	1	12	GAS3-N350VS	0	FALSE	0	0.99	FALSE	1
712	430.248	12	GAS3-N350VS		1	NVSLPTTK	N[712]VSLPTTK	2	Y	2	1	12	GAS3-N350VS	0	FALSE	0	0.99	FALSE	1
737	430.248	12	GAS3-N350VS		1	NVSLPTTK	N[737]VSLPTTK	2	Y	2	1	12	GAS3-N350VS	0	FALSE	0	0.99	FALSE	1
762	430.248	12	GAS3-N350VS		1	NVSLPTTK	N[762]VSLPTTK	2	Y	2	1	12	GAS3-N350VS	0	FALSE	0	0.99	FALSE	1
787	430.248	12	GAS3-N350VS		1	NVSLPTTK	N[787]VSLPTTK	2	Y	2	1	12	GAS3-N350VS	0	FALSE	0	0.99	FALSE	1
812	430.248	12	GAS3-N350VS		1	NVSLPTTK	N[812]VSLPTTK	2	Y	2	1	12	GAS3-N350VS	0	FALSE	0	0.99	FALSE	1
837	430.248	12	GAS3-N350VS		1	NVSLPTTK	N[837]VSLPTTK	2	Y	2	1	12	GAS3-N350VS	0	FALSE	0	0.99	FALSE	1
862	430.248	12	GAS3-N350VS		1	NVSLPTTK	N[862]VSLPTTK	2	Y	2	1	12	GAS3-N350VS	0	FALSE	0	0.99	FALSE	1
887	430.248	12	GAS3-N350VS		1	NVSLPTTK	N[887]VSLPTTK	2	Y	2	1	12	GAS3-N350VS	0	FALSE	0	0.99	FALSE	1
912	430.248	12	GAS3-N350VS		1	NVSLPTTK	N[912]VSLPTTK	2	Y	2	1	12	GAS3-N350VS	0	FALSE	0	0.99	FALSE	1
937	430.248	12	GAS3-N350VS		1	NVSLPTTK	N[937]VSLPTTK	2	Y	2	1	12	GAS3-N350VS	0	FALSE	0	0.99	FALSE	1
962	430.248	12	GAS3-N350VS		1	NVSLPTTK	N[962]VSLPTTK	2	Y	2	1	12	GAS3-N350VS	0	FALSE	0	0.99	FALSE	1
987	430.248	12	GAS3-N350VS		1	NVSLPTTK	N[987]VSLPTTK	2	Y	2	1	12	GAS3-N350VS	0	FALSE	0	0.99	FALSE	1
1012	430.248	12	GAS3-N350VS		1	NVSLPTTK	N[1012]VSLPTTK	2	Y	2	1	12	GAS3-N350VS	0	FALSE	0	0.99	FALSE	1
1037	430.248	12	GAS3-N350VS		1	NVSLPTTK	N[1037]VSLPTTK	2	Y	2	1	12	GAS3-N350VS	0	FALSE	0	0.99	FALSE	1
1062	430.248	12	GAS3-N350VS		1	NVSLPTTK	N[1062]VSLPTTK	2	Y	2	1	12	GAS3-N350VS	0	FALSE	0	0.99	FALSE	1
1087	430.248	12	GAS3-N350VS		1	NVSLPTTK	N[1087]VSLPTTK	2	Y	2	1	12	GAS3-N350VS	0	FALSE	0	0.99	FALSE	1
1112	430.248	12	GAS3-N350VS		1	NVSLPTTK	N[1112]VSLPTTK	2	Y	2	1	12	GAS3-N350VS	0	FALSE	0	0.99	FALSE	1
1137	430.248	12	GAS3-N350VS		1	NVSLPTTK	N[1137]VSLPTTK	2	Y	2	1	12	GAS3-N350VS	0	FALSE	0	0.99	FALSE	1
1162	430.248	12	GAS3-N350VS		1	NVSLPTTK	N[1162]VSLPTTK	2	Y	2	1	12	GAS3-N350VS	0	FALSE	0	0.99	FALSE	1
1187	430.248	12	GAS3-N350VS		1	NVSLPTTK	N[1187]VSLPTTK	2	Y	2	1	12	GAS3-N350VS	0	FALSE	0	0.99	FALSE	1
1212	430.248	12	GAS3-N350VS		1	NVSLPTTK	N[1212]VSLPTTK	2	Y	2	1	12	GAS3-N350VS	0	FALSE	0	0.99	FALSE	1
1237	430.248	12	GAS3-N350VS		1	NVSLPTTK	N[1237]VSLPTTK	2	Y	2	1	12	GAS3-N350VS	0	FALSE	0	0.99	FALSE	1
412.5	1062.57	12	GAS3-N350VS		1	NVSLPTTK	N[412]VSLPTTK	2	Y	1	2	12	GAS3-N350VS	0	FALSE	0	0.99	FALSE	1
437	1062.57	12	GAS3-N350VS		1	NVSLPTTK	N[437]VSLPTTK	2	Y	1	2	12	GAS3-N350VS	0	FALSE	0	0.99	FALSE	1
462	1062.57	12	GAS3-N350VS		1	NVSLPTTK	N[462]VSLPTTK	2	Y	1	2	12	GAS3-N350VS	0	FALSE	0	0.99	FALSE	1
487	1062.57	12	GAS3-N350VS		1	NVSLPTTK	N[487]VSLPTTK	2	Y	1	2	12	GAS3-N350VS	0	FALSE	0	0.99	FALSE	1
512	1062.57	12	GAS3-N350VS		1	NVSLPTTK	N[512]VSLPTTK	2	Y	1	2	12	GAS3-N350VS	0	FALSE	0	0.99	FALSE	1
537	1062.57	12	GAS3-N350VS		1	NVSLPTTK	N[537]VSLPTTK	2	Y	1	2	12	GAS3-N350VS	0	FALSE	0	0.99	FALSE	1
562	1062.57	12	GAS3-N350VS		1	NVSLPTTK	N[562]VSLPTTK	2	Y	1	2	12	GAS3-N350VS	0	FALSE	0	0.99	FALSE	1
587	1062.57	12	GAS3-N350VS		1	NVSLPTTK	N[587]VSLPTTK	2	Y	1	2	12	GAS3-N350VS	0	FALSE	0	0.99	FALSE	1
612	1062.57	12	GAS3-N350VS		1	NVSLPTTK	N[612]VSLPTTK	2	Y	1	2	12	GAS3-N350VS	0	FALSE	0	0.99	FALSE	1
637	1062.57	12	GAS3-N350VS		1	NVSLPTTK	N[637]VSLPTTK	2	Y	1	2	12	GAS3-N350VS	0	FALSE	0	0.99	FALSE	1
662	1062.57	12	GAS3-N350VS		1	NVSLPTTK	N[662]VSLPTTK	2	Y	1	2	12	GAS3-N350VS	0	FALSE	0	0.99	FALSE	1
687	1062.57	12	GAS3-N350VS		1	NVSLPTTK	N[687]VSLPTTK	2	Y	1	2	12	GAS3-N350VS	0	FALSE	0	0.99	FALSE	1
712	1062.57	12	GAS3-N350VS		1	NVSLPTTK	N[712]VSLPTTK	2	Y	1	2	12	GAS3-N350VS	0	FALSE	0	0.99	FALSE	1
737	1062.57	12	GAS3-N350VS		1	NVSLPTTK	N[737]VSLPTTK	2	Y	1	2	12	GAS3-N350VS	0	FALSE	0	0.99	FALSE	1
762	1062.57	12	GAS3-N350VS		1	NVSLPTTK	N[762]VSLPTTK	2	Y	1	2	12	GAS3-N350VS	0	FALSE	0	0.99	FALSE	1
787	1062.57	12	GAS3-N350VS		1	NVSLPTTK	N[787]VSLPTTK	2	Y	1	2	12	GAS3-N350VS	0	FALSE	0	0.99	FALSE	1
812	1062.57	12	GAS3-N350VS		1	NVSLPTTK	N[812]VSLPTTK	2	Y	1	2	12	GAS3-N350VS	0	FALSE	0	0.99	FALSE	1
837	1062.57	12	GAS3-N350VS		1	NVSLPTTK	N[837]VSLPTTK	2	Y	1	2	12	GAS3-N350VS	0	FALSE	0	0.99	FALSE	1
862	1062.57	12	GAS3-N350VS		1	NVSLPTTK	N[862]VSLPTTK	2	Y	1	2	12	GAS3-N350VS	0	FALSE	0	0.99	FALSE	1
887	1062.57	12	GAS3-N350VS		1	NVSLPTTK	N[887]VSLPTTK	2	Y	1	2	12	GAS3-N350VS	0	FALSE	0	0.99	FALSE	1
912	1062.57	12	GAS3-N350VS		1	NVSLPTTK	N[912]VSLPTTK	2	Y	1	2	12	GAS3-N350VS	0	FALSE	0	0.99	FALSE	1
937	1062.57	12	GAS3-N350VS		1	NVSLPTTK	N[937]VSLPTTK	2	Y	1	2	12	GAS3-N350VS	0	FALSE	0	0.99	FALSE	1
962	1062.57	12	GAS3-N350VS		1	NVSLPTTK	N[962]VSLPTTK	2	Y	1	2	12	GAS3-N350VS	0	FALSE	0	0.99	FALSE	1
987	1062.57	12	GAS3-N350VS		1	NVSLPTTK	N[987]VSLPTTK	2	Y	1	2	12	GAS3-N350VS	0	FALSE	0	0.99	FALSE	1
1012	1062.57	12	GAS3-N350VS		1	NVSLPTTK	N[1012]VSLPTTK	2	Y	1	2	12	GAS3-N350VS	0	FALSE	0	0.99	FALSE	1
1037	1062.57	12	GAS3-N350VS		1	NVSLPTTK	N[1037]VSLPTTK	2	Y	1	2	12	GAS3-N350VS	0	FALSE	0	0.99	FALSE	1
1062	1062.57	12	GAS3-N350VS		1	NVSLPTTK	N[1062]VSLPTTK	2	Y	1	2	12	GAS3-N350VS	0	FALSE	0	0.99	FALSE	1
1087	1062.57	12	GAS3-N350VS		1	NVSLPTTK	N[1087]VSLPTTK	2	Y	1	2	12	GAS3-N350VS	0	FALSE	0	0.99	FALSE	1
1112	1062.57	12	GAS3-N350VS		1	NVSLPTTK	N[1112]VSLPTTK	2	Y	1	2	12	GAS3-N350VS	0	FALSE	0	0.99	FALSE	1
1137	1062.57	12	GAS3-N350VS		1	NVSLPTTK	N[1137]VSLPTTK	2	Y	1	2	12	GAS3-N350VS	0	FALSE	0	0.99	FALSE	1
1162	1062.57	12	GAS3-N350VS		1	NVSLPTTK	N[1162]VSLPTTK	2	Y	1	2	12	GAS3-N350VS	0	FALSE	0	0.99	FALSE	1
1187	1062.57	12	GAS3-N350VS		1	NVSLPTTK	N[1187]VSLPTTK	2	Y	1	2	12	GAS3-N350VS	0	FALSE	0	0.99	FALSE	1
1212	1062.57	12	GAS3-N350VS		1	NVSLPTTK	N[1212]VSLPTTK	2	Y	1	2	12	GAS3-N350VS	0	FALSE	0	0.99	FALSE	1
1237	1062.57	12	GAS3-N350VS		1	NVSLPTTK	N[1237]VSLPTTK	2	Y	1	2	12	GAS3-N350VS	0	FALSE	0	0.99	FALSE	1
412.5	531.788	12	GAS3-N350VS		1	NVSLPTTK	N[412]VSLPTTK	2	Y	2	2	12	GAS3-N350VS	0	FALSE	0	0.99	FALSE	1
437	531.788	12	GAS3-N350VS		1	NVSLPTTK	N[437]VSLPTTK	2	Y	2	2	12	GAS3-N350VS	0	FALSE	0	0.99	FALSE	1
462	531.788	12	GAS3-N350VS		1	NVSLPTTK	N[462]VSLPTTK	2	Y	2	2	12	GAS3-N350VS	0	FALSE	0	0.99	FALSE	1
487	531.788	12	GAS3-N350VS		1	NVSLPTTK	N[487]VSLPTTK	2	Y	2	2	12	GAS3-N350VS	0	FALSE	0	0.99	FALSE	1
512	531.788	12	GAS3-N350VS		1	NVSLPTTK	N[512]VSLPTTK	2	Y	2	2	12	GAS3-N350VS	0	FALSE	0	0.99	FALSE	1
537	531.788	12	GAS3-N350VS		1	NVSLPTTK	N[537]VSLPTTK	2	Y	2	2	12	GAS3-N350VS	0	FALSE	0	0.99	FALSE	1
562	531.788	12	GAS3-N350VS		1	NVSLPTTK	N[562]VSLPTTK	2	Y	2	2	12	GAS3-N350VS	0	FALSE	0	0.99	FALSE	1
587	531.788	12	GAS3-N350VS		1	NVSLPTTK	N[587]VSLPTTK	2	Y	2	2	12	GAS3-N350VS	0	FALSE	0	0.99	FALSE	1
612	531.788	12	GAS3-N350VS		1	NVSLPTTK	N[612]VSLPTTK	2	Y	2	2	12	GAS3-N350VS	0	FALSE	0	0.99	FALSE	1
637	531.788	12	GAS3-N350VS		1	NVSLPTTK	N[637]VSLPTTK	2	Y	2	2	12	GAS3-N350VS	0	FALSE	0	0.99	FALSE	1
662	531.788	12	GAS3-N350VS		1	NVSLPTTK	N[662]VSLPTTK	2	Y	2	2	12	GAS3-N350VS	0	FALSE	0	0.99	FALSE	1
687	531.788	12	GAS3-N350VS		1	NVSLPTTK	N[687]VSLPTTK	2	Y	2	2	12	GAS3-N350VS	0	FALSE	0	0.99	FALSE	1
712	531.788	12	GAS3-N350VS		1	NVSLPTTK	N[712]VSLPTTK	2	Y	2	2	12	GAS3-N350VS	0	FALSE	0	0.99	FALSE	1
737	531.788	12	GAS3-N350VS		1	NVSLPTTK	N[737]VSLPTTK	2	Y	2	2	12	GAS3-N350VS	0	FALSE	0	0.99	FALSE	1
762	531.788	12	GAS3-N350VS		1	NVSLPTTK	N[762]VSLPTTK	2	Y	2	2	12	GAS3-N350VS	0	FALSE	0	0.99	FALSE	1
787	531.788	12	GAS3-N350VS		1	NVSLPTTK	N[787]VSLPTTK	2	Y	2	2	12	GAS3-N350VS	0	FALSE	0	0.99	FALSE	1
812	531.788	12	GAS3-N350VS		1	NVSLPTTK	N[812]VSLPTTK	2	Y	2	2	12	GAS3-N350VS	0	FALSE	0	0.99	FALSE	1
837	531.788	12	GAS3-N350VS		1	NVSLPTTK	N[837]VSLPTTK	2	Y	2	2	12	GAS3-N350VS	0	FALSE	0	0.99	FALSE	1
862	531.788	12	GAS3-N350VS		1	NVSLPTTK	N[862]VSLPTTK	2	Y	2	2	12	GAS3-N350VS	0	FALSE	0	0.99	FALSE	1
887	531.788	12	GAS3-N350VS		1	NVSLPTTK	N[887]VSLPTTK	2	Y	2	2	12	GAS3-N350VS	0	FALSE	0	0.99	FALSE	1
912	531.788	12	GAS3-N350VS		1	NVSLPTTK	N[912]VSLPTTK	2	Y	2	2	12	GAS3-N350VS	0	FALSE	0	0.99	FALSE	1
937	531.788	12	GAS3-N350VS		1	NVSLPTTK	N[937]VSLPTTK	2	Y	2	2	12	GAS3-N350VS	0	FALSE	0	0.99	FALSE	1
962	531.788	12	GAS3-N350VS		1	NVSLPTTK	N[962]VSLPTTK	2	Y	2	2	12	GAS3-N350VS	0	FALSE	0	0.99	FALSE	1
987	531.788	12	GAS3-N350VS		1	NVSLPTTK	N[987]VSLPTTK	2	Y	2	2	12	GAS3-N350VS	0	FALSE	0	0.99	FALSE	1
1012	531.788	12	GAS3-N350VS		1	NVSLPTTK	N[1012]VSLPTTK	2	Y	2	2	12	GAS3-N350VS	0	FALSE	0	0.99	FALSE	1
1037	531.788	12	GAS3-N350VS		1	NVSLPTTK	N[1037]VSLPTTK	2	Y	2	2	12	GAS3-N350VS	0	FALSE	0	0.99	FALSE	1
1062	531.788	12	GAS3-N350VS		1	NVSLPTTK	N[1062]VSLPTTK	2	Y	2	2	12	GAS3-N350VS	0	FALSE	0	0.99	FALSE	1
1087	531.788	12	GAS3-N350VS		1	NVSLPTTK	N[1087]VSLPTTK	2	Y	2	2	12	GAS3-N350VS	0	FALSE	0	0.99	FALSE	1
1112	531.788	12	GAS3-N350VS		1	NVSLPTTK	N[1112]VSLPTTK	2	Y	2	2	12	GAS3-N350VS	0	FALSE	0	0.99	FALSE	1
1137	531.788	12	GAS3-N350VS		1	NVSLPTTK	N[1137]VSLPTTK	2	Y	2	2	12	GAS3-N350VS	0	FALSE	0	0.99	FALSE	1
1162	531.788	12	GAS3-N350VS		1	NVSLPTTK	N[1162]VSLPTTK	2	Y	2	2	12	GAS3-N350VS	0	FALSE	0	0.99	FALSE	1
1187	531.788	12	GAS3-N350VS		1	NVSLPTTK	N[1187]VSLPTTK	2	Y	2	2	12	GAS3-N350VS	0	FALSE	0	0.99	FALSE	1
1212	531.788	12	GAS3-N350VS		1	NVSLPTTK	N[1212]VSLPTTK	2	Y	2	2	12	GAS3-N350VS	0	FALSE	0	0.99	FALSE	1
1237	531.788	12	GAS3-N350VS		1	NVSLPTTK	N[1237]VSLPTTK	2	Y	2	2	12	GAS3-N350VS	0	FALSE	0	0.99	FALSE	1
412.5	1265.65	12	GAS3-N350VS		1	NVSLPTTK	N[412]VSLPTTK	2	Y	1	3	12	GAS3-N350VS	0	FALSE	0	0.99	FALSE	1
437	1265.65	12	GAS3-N350VS		1	NVSLPTTK	N[437]VSLPTTK	2	Y	1	3	12	GAS3-N350VS	0	FALSE	0	0.99	FALSE	1
462	1265.65	12	GAS3-N350VS		1	NVSLPTTK	N[462]VSLPTTK	2	Y	1	3	12	GAS3-N350VS	0	FALSE	0	0.99	FALSE	1
487	1265.65	12	GAS3-N350VS		1	NVSLPTTK	N[487]VSLPTTK	2	Y	1	3	12	GAS3-N350VS	0	FALSE	0	0.99	FALSE	1
512	1265.65	12	GAS3-N350VS		1	NVSLPTTK	N[512]VSLPTTK	2	Y	1	3	12	GAS3-N350VS	0	FALSE	0	0.99	FALSE	1
537	1265.65	12	GAS3-N350VS		1	NVSLPTTK	N[537]VSLPTTK	2	Y	1	3	12	GAS3-N350VS	0	FALSE	0	0.99	FALSE	1
562	1265.65	12	GAS3-N350VS		1	NVSLPTTK	N[562]VSLPTTK	2	Y	1	3	12	GAS3-N350VS	0	FALSE	0	0.99	FALSE	1
587	1265.65	12	GAS3-N350VS		1	NVSLPTTK	N[587]VSLPTTK	2	Y	1	3	12	GAS3-N350VS	0	FALSE	0	0.99	FALSE	1
612	1265.65	12	GAS3-N350VS		1	NVSLPTTK	N[612]VSLPTTK	2	Y	1	3	12	GAS3-N350VS	0	FALSE	0	0.99	FALSE	1
637	1265.65	12	GAS3-N350VS		1	NVSLPTTK	N[637]VSLPTTK	2	Y	1	3	12	GAS3-N350VS	0	FALSE	0	0.99	FALSE	1
662	1265.65	12	GAS3-N350VS		1	NVSLPTTK	N[662]VSLPTTK	2	Y	1	3	12	GAS3-N350VS	0	FALSE	0	0.99	FALSE	1
687	1265.65	12	GAS3-N350VS		1	NVSLPTTK	N[687]VSLPTTK	2	Y	1	3	12	GAS3-N350VS	0	FALSE	0	0.99	FALSE	1
712	1265.65	12	GAS3-N350VS		1	NVSLPTTK	N[712]VSLPTTK	2	Y	1	3	12	GAS3-N350VS	0	FALSE	0	0.99	FALSE	1
737	1265.65	12	GAS3-N350VS		1	NVSLPTTK	N[737]VSLPTTK	2	Y	1	3	12	GAS3-N350VS	0	FALSE	0	0.99	FALSE	1
762	1265.65	12	GAS3-N350VS		1	NVSLPTTK	N[762]VSLPTTK	2	Y	1	3	12	GAS3-N350VS	0	FALSE	0	0.99	FALSE	1
787	1265.65	12	GAS3-N350VS		1	NVSLPTTK	N[787]VSLPTTK	2	Y	1	3	12	GAS3-N350VS	0	FALSE	0	0.99	FALSE	1
812	1265.65	12	GAS3-N350VS		1	NVSLPTTK	N[812]VSLPTTK	2	Y	1	3	12	GAS3-N350VS	0	FALSE	0	0.99	FALSE	1
837	1265.65	12	GAS3-N350VS		1	NVSLPTTK	N[837]VSLPTTK	2	Y	1	3	12	GAS3-N350VS	0	FALSE	0	0.99	FALSE	1
862	1265.65	12	GAS3-N350VS		1	NVSLPTTK	N[862]VSLPTTK	2	Y	1	3	12	GAS3-N350VS	0	FALSE	0	0.99	FALSE	1
887	1265.65	12	GAS3-N350VS		1	NVSLPTTK	N[887]VSLPTTK	2	Y	1	3	12	GAS3-N350VS	0	FALSE	0	0.99	FALSE	1
912	1265.65	12	GAS3-N350VS		1	NVSLPTTK	N[912]VSLPTTK	2	Y	1	3	12	GAS3-N350VS	0	FALSE	0	0.99	FALSE	1
937	1265.65	12	GAS3-N350VS		1	NVSLPTTK	N[937]VSLPTTK	2	Y	1	3	12	GAS3-N350VS	0	FALSE	0	0.99	FALSE	1
962	1265.65	12	GAS3-N350VS		1	NVSLPTTK	N[962]VSLPTTK	2	Y	1	3	12	GAS3-N350VS	0	FALSE	0	0.99	FALSE	1
987	1265.65	12	GAS3-N350VS		1	NVSLPTTK	N[987]VSLPTTK	2	Y	1	3	12	GAS3-N350VS	0	FALSE	0	0.99	FALSE	1
1012	1265.65	12	GAS3-N350VS		1	NVSLPTTK	N[1012]VSLPTTK	2	Y	1	3	12	GAS3-N350VS	0	FALSE	0	0.99	FALSE	1
1037	1265.65	12	GAS3-N350VS		1	NVSLPTTK	N[1037]VSLPTTK	2	Y	1	3	12	GAS3-N350VS	0	FALSE	0	0.99	FALSE	1
1062	1265.65	12	GAS3-N350VS		1	NVSLPTTK	N[1062]VSLPTTK	2	Y	1	3	12	GAS3-N350VS	0	FALSE	0	0.99	FALSE	1
1087	1265.65	12	GAS3-N350VS		1	NVSLPTTK	N[1087]VSLPTTK	2	Y	1	3	12	GAS3-N350VS	0	FALSE	0	0.99	FALSE	1
1112	1265.65	12	GAS3-N350VS		1	NVSLPTTK	N[1112]VSLPTTK	2	Y	1	3	12	GAS3-N350VS	0	FALSE	0	0.99	FALSE	1
1137	1265.65	12	GAS3-N350VS		1	NVSLPTTK	N[1137]VSLPTTK	2	Y	1	3	12	GAS3-N350VS	0	FALSE	0	0.99	FALSE	1
1162	1265.65	12	GAS3-N350VS		1	NVSLPTTK	N[1162]VSLPTTK	2	Y	1	3	12	GAS3-N350VS	0	FALSE	0	0.99	FALSE	1
1187	1265.65	12	GAS3-N350VS		1	NVSLPTTK	N[1187]VSLPTTK	2	Y	1	3	12	GAS3-N350VS	0	FALSE	0	0.99	FALSE	1
1212	1265.65	12	GAS3-N350VS		1	NVSLPTTK	N[1212]VSLPTTK	2	Y	1	3	12	GAS3-N350VS	0	FALSE	0	0.99	FALSE	1
1237	1265.65	12	GAS3-N350VS		1	NVSLPTTK	N[1237]VSLPTTK	2	Y	1	3	12	GAS3-N350VS	0	FALSE	0	0.99	FALSE	1
412.5	633.327	12	GAS3-N350VS		1	NVSLPTTK	N[412]VSLPTTK	2	Y	2	3	12	GAS3-N350VS	0	FALSE	0	0.99	FALSE	1
437	633.327	12	GAS3-N350VS		1	NVSLPTTK	N[437]VSLPTTK	2	Y	2	3	12	GAS3-N350VS	0	FALSE	0	0.99	FALSE	1
462	633.327	12	GAS3-N350VS		1	NVSLPTTK	N[462]VSLPTTK	2	Y	2	3	12	GAS3-N350VS	0	FALSE	0	0.99	FALSE	1
487	633.327	12	GAS3-N350VS		1	NVSLPTTK	N[487]VSLPTTK	2	Y	2	3	12	GAS3-N350VS	0	FALSE	0	0.99	FALSE	1
512	633.327	12	GAS3-N350VS		1	NVSLPTTK	N[512]VSLPTTK	2	Y	2	3	12	GAS3-N350VS	0	FALSE	0	0.99	FALSE	1
537	633.327	12	GAS3-N350VS		1	NVSLPTTK	N[537]VSLPTTK	2	Y	2	3	12	GAS3-N350VS	0	FALSE	0	0.99	FALSE	1
562	633.327	12	GAS3-N350VS		1	NVSLPTTK	N[562]VSLPTTK	2	Y	2	3	12	GAS3-N350VS	0	FALSE	0	0.99	FALSE	1
587	633.327	12	GAS3-N350VS		1	NVSLPTTK	N[587]VSLPTTK	2	Y	2	3	12	GAS3-N350VS	0	FALSE	0	0.99	FALSE	1
612	633.327	12	GAS3-N350VS		1	NVSLPTTK	N[612]VSLPTTK	2	Y	2	3	12	GAS3-N350VS	0	FALSE	0	0.99	FALSE	1
637	633.327	12	GAS3-N350VS		1	NVSLPTTK	N[637]VSLPTTK	2	Y	2	3	12	GAS3-N350VS	0	FALSE	0	0.99	FALSE	1
662	633.327	12	GAS3-N350VS		1	NVSLPTTK	N[662]VSLPTTK	2	Y	2	3	12	GAS3-N350VS	0	FALSE	0	0.99	FALSE	1
687	633.327	12	GAS3-N350VS		1	NVSLPTTK	N[687]VSLPTTK	2	Y	2	3	12	GAS3-N350VS	0	FALSE	0	0.99	FALSE	1
712	633.327	12	GAS3-N350VS		1	NVSLPTTK	N[712]VSLPTTK	2	Y	2	3	12	GAS3-N350VS	0	FALSE	0	0.99	FALSE	1
737	633.327	12	GAS3-N350VS		1	NVSLPTTK	N[737]VSLPTTK	2	Y	2	3	12	GAS3-N350VS	0	FALSE	0	0.99	FALSE	1
762	633.327	12	GAS3-N350VS		1	NVSLPTTK	N[762]VSLPTTK	2	Y	2	3	12	GAS3-N350VS	0	FALSE	0	0.99	FALSE	1
787	633.327	12	GAS3-N350VS		1	NVSLPTTK	N[787]VSLPTTK	2	Y	2	3	12	GAS3-N350VS	0	FALSE	0	0.99	FALSE	1
812	633.327	12	GAS3-N350VS		1	NVSLPTTK	N[812]VSLPTTK	2	Y	2	3	12	GAS3-N350VS	0	FALSE	0	0.99	FALSE	1
837	633.327	12	GAS3-N350VS		1	NVSLPTTK	N[837]VSLPTTK	2	Y	2	3	12	GAS3-N350VS	0	FALSE	0	0.99	FALSE	1
862	633.327	12	GAS3-N350VS		1	NVSLPTTK	N[862]VSLPTTK	2	Y	2	3	12	GAS3-N350VS	0	FALSE	0	0.99	FALSE	1
887	633.327	12	GAS3-N350VS		1	NVSLPTTK	N[887]VSLPTTK	2	Y	2	3	12	GAS3-N350VS	0	FALSE	0	0.99	FALSE	1
912	633.327	12	GAS3-N350VS		1	NVSLPTTK	N[912]VSLPTTK	2	Y	2	3	12	GAS3-N350VS	0	FALSE	0	0.99	FALSE	1
937	633.327	12	GAS3-N350VS		1	NVSLPTTK	N[937]VSLPTTK	2	Y	2	3	12	GAS3-N350VS	0	FALSE	0	0.99	FALSE	1
962	633.327	12	GAS3-N350VS		1	NVSLPTTK	N[962]VSLPTTK	2	Y	2	3	12	GAS3-N350VS	0	FALSE	0	0.99	FALSE	1
987	633.327	12	GAS3-N350VS		1	NVSLPTTK	N[987]VSLPTTK	2	Y	2	3	12	GAS3-N350VS	0	FALSE	0	0.99	FALSE	1
1012	633.327	12	GAS3-N350VS		1	NVSLPTTK	N[1012]VSLPTTK	2	Y	2	3	12	GAS3-N350VS	0	FALSE	0	0.99	FALSE	1
1037	633.327	12	GAS3-N350VS		1	NVSLPTTK	N[1037]VSLPTTK	2	Y	2	3	12	GAS3-N350VS	0	FALSE	0	0.99	FALSE	1
1062	633.327	12	GAS3-N350VS		1	NVSLPTTK	N[1062]VSLPTTK	2	Y	2	3	12	GAS3-N350VS	0	FALSE	0	0.99	FALSE	1
1087	633.327	12	GAS3-N350VS		1	NVSLPTTK	N[1087]VSLPTTK	2	Y	2	3	12	GAS3-N350VS	0	FALSE	0	0.99	FALSE	1
1112	633.327	12	GAS3-N350VS		1	NVSLPTTK	N[1112]VSLPTTK	2	Y	2	3	12	GAS3-N350VS	0	FALSE	0	0.99	FALSE	1
1137	633.327	12	GAS3-N350VS		1	NVSLPTTK	N[1137]VSLPTTK	2	Y	2	3	12	GAS3-N350VS	0	FALSE	0	0.99	FALSE	1
1162	633.327	12	GAS3-N350VS		1	NVSLPTTK	N[1162]VSLPTTK	2	Y	2	3	12	GAS3-N350VS	0	FALSE	0	0.99	FALSE	1
1187	633.327	12	GAS3-N350VS		1	NVSLPTTK	N[1187]VSLPTTK	2	Y	2	3	12	GAS3-N350VS	0	FALSE	0	0.99	FALSE	1
1212	633.327	12	GAS3-N350VS		1	NVSLPTTK	N[1212]VSLPTTK	2	Y	2	3	12	GAS3-N350VS	0	FALSE	0	0.99	FALSE	1
1237	633.327	12	GAS3-N350VS		1	NVSLPTTK	N[1237]VSLPTTK	2	Y	2	3	12	GAS3-N350VS	0	FALSE	0	0.99	FALSE	1
412.5	1642.76	12	GAS1-N40GS		1	FFYSNNGSQFYIR	FFYSNN[412]GSQFYIR	2	Y	1	1	12	GAS1-N40GS	0	FALSE	0	0.99	FALSE	1
437	1642.76	12	GAS1-N40GS		1	FFYSNNGSQFYIR	FFYSNN[437]GSQFYIR	2	Y	1	1	12	GAS1-N40GS	0	FALSE	0	0.99	FALSE	1
462	1642.76	12	GAS1-N40GS		1	FFYSNNGSQFYIR	FFYSNN[462]GSQFYIR	2	Y	1	1	12	GAS1-N40GS	0	FALSE	0	0.99	FALSE	1
487	1642.76	12	GAS1-N40GS		1	FFYSNNGSQFYIR	FFYSNN[487]GSQFYIR	2	Y	1	1	12	GAS1-N40GS	0	FALSE	0	0.99	FALSE	1
512	1642.76	12	GAS1-N40GS		1	FFYSNNGSQFYIR	FFYSNN[512]GSQFYIR	2	Y	1	1	12	GAS1-N40GS	0	FALSE	0	0.99	FALSE	1
537	1642.76	12	GAS1-N40GS		1	FFYSNNGSQFYIR	FFYSNN[537]GSQFYIR	2	Y	1	1	12	GAS1-N40GS	0	FALSE	0	0.99	FALSE	1
562	1642.76	12	GAS1-N40GS		1	FFYSNNGSQFYIR	FFYSNN[562]GSQFYIR	2	Y	1	1	12	GAS1-N40GS	0	FALSE	0	0.99	FALSE	1
587	1642.76	12	GAS1-N40GS		1	FFYSNNGSQFYIR	FFYSNN[587]GSQFYIR	2	Y	1	1	12	GAS1-N40GS	0	FALSE	0	0.99	FALSE	1
612	1642.76	12	GAS1-N40GS		1	FFYSNNGSQFYIR	FFYSNN[612]GSQFYIR	2	Y	1	1	12	GAS1-N40GS	0	FALSE	0	0.99	FALSE	1
637	1642.76	12	GAS1-N40GS		1	FFYSNNGSQFYIR	FFYSNN[637]GSQFYIR	2	Y	1	1	12	GAS1-N40GS	0	FALSE	0	0.99	FALSE	1
662	1642.76	12	GAS1-N40GS		1	FFYSNNGSQFYIR	FFYSNN[662]GSQFYIR	2	Y	1	1	12	GAS1-N40GS	0	FALSE	0	0.99	FALSE	1
687	1642.76	12	GAS1-N40GS		1	FFYSNNGSQFYIR	FFYSNN[687]GSQFYIR	2	Y	1	1	12	GAS1-N40GS	0	FALSE	0	0.99	FALSE	1
712	1642.76	12	GAS1-N40GS		1	FFYSNNGSQFYIR	FFYSNN[712]GSQFYIR	2	Y	1	1	12	GAS1-N40GS	0	FALSE	0	0.99	FALSE	1
737	1642.76	12	GAS1-N40GS		1	FFYSNNGSQFYIR	FFYSNN[737]GSQFYIR	2	Y	1	1	12	GAS1-N40GS	0	FALSE	0	0.99	FALSE	1
762	1642.76	12	GAS1-N40GS		1	FFYSNNGSQFYIR	FFYSNN[762]GSQFYIR	2	Y	1	1	12	GAS1-N40GS	0	FALSE	0	0.99	FALSE	1
787	1642.76	12	GAS1-N40GS		1	FFYSNNGSQFYIR	FFYSNN[787]GSQFYIR	2	Y	1	1	12	GAS1-N40GS	0	FALSE	0	0.99	FALSE	1
812	1642.76	12	GAS1-N40GS		1	FFYSNNGSQFYIR	FFYSNN[812]GSQFYIR	2	Y	1	1	12	GAS1-N40GS	0	FALSE	0	0.99	FALSE	1
837	1642.76	12	GAS1-N40GS		1	FFYSNNGSQFYIR	FFYSNN[837]GSQFYIR	2	Y	1	1	12	GAS1-N40GS	0	FALSE	0	0.99	FALSE	1
862	1642.76	12	GAS1-N40GS		1	FFYSNNGSQFYIR	FFYSNN[862]GSQFYIR	2	Y	1	1	12	GAS1-N40GS	0	FALSE	0	0.99	FALSE	1
887	1642.76	12	GAS1-N40GS		1	FFYSNNGSQFYIR	FFYSNN[887]GSQFYIR	2	Y	1	1	12	GAS1-N40GS	0	FALSE	0	0.99	FALSE	1
912	1642.76	12	GAS1-N40GS		1	FFYSNNGSQFYIR	FFYSNN[912]GSQFYIR	2	Y	1	1	12	GAS1-N40GS	0	FALSE	0	0.99	FALSE	1
937	1642.76	12	GAS1-N40GS		1	FFYSNNGSQFYIR	FFYSNN[937]GSQFYIR	2	Y	1	1	12	GAS1-N40GS	0	FALSE	0	0.99	FALSE	1
962	1642.76	12	GAS1-N40GS		1	FFYSNNGSQFYIR	FFYSNN[962]GSQFYIR	2	Y	1	1	12	GAS1-N40GS	0	FALSE	0	0.99	FALSE	1
987	1642.76	12	GAS1-N40GS		1	FFYSNNGSQFYIR	FFYSNN[987]GSQFYIR	2	Y	1	1	12	GAS1-N40GS	0	FALSE	0	0.99	FALSE	1
1012	1642.76	12	GAS1-N40GS		1	FFYSNNGSQFYIR	FFYSNN[1012]GSQFYIR	2	Y	1	1	12	GAS1-N40GS	0	FALSE	0	0.99	FALSE	1
1037	1642.76	12	GAS1-N40GS		1	FFYSNNGSQFYIR	FFYSNN[1037]GSQFYIR	2	Y	1	1	12	GAS1-N40GS	0	FALSE	0	0.99	FALSE	1
1062	1642.76	12	GAS1-N40GS		1	FFYSNNGSQFYIR	FFYSNN[1062]GSQFYIR	2	Y	1	1	12	GAS1-N40GS	0	FALSE	0	0.99	FALSE	1
1087	1642.76	12	GAS1-N40GS		1	FFYSNNGSQFYIR	FFYSNN[1087]GSQFYIR	2	Y	1	1	12	GAS1-N40GS	0	FALSE	0	0.99	FALSE	1
1112	1642.76	12	GAS1-N40GS		1	FFYSNNGSQFYIR	FFYSNN[1112]GSQFYIR	2	Y	1	1	12	GAS1-N40GS	0	FALSE	0	0.99	FALSE	1
1137	1642.76	12	GAS1-N40GS		1	FFYSNNGSQFYIR	FFYSNN[1137]GSQFYIR	2	Y	1	1	12	GAS1-N40GS	0	FALSE	0	0.99	FALSE	1
1162	1642.76	12	GAS1-N40GS		1	FFYSNNGSQFYIR	FFYSNN[1162]GSQFYIR	2	Y	1	1	12	GAS1-N40GS	0	FALSE	0	0.99	FALSE	1
1187	1642.76	12	GAS1-N40GS		1	FFYSNNGSQFYIR	FFYSNN[1187]GSQFYIR	2	Y	1	1	12	GAS1-N40GS	0	FALSE	0	0.99	FALSE	1
1212	1642.76	12	GAS1-N40GS		1	FFYSNNGSQFYIR	FFYSNN[1212]GSQFYIR	2	Y	1	1	12	GAS1-N40GS	0	FALSE	0	0.99	FALSE	1
1237	1642.76	12	GAS1-N40GS		1	FFYSNNGSQFYIR	FFYSNN[1237]GSQFYIR	2	Y	1	1	12	GAS1-N40GS	0	FALSE	0	0.99	FALSE	1
412.5	821.886	12	GAS1-N40GS		1	FFYSNNGSQFYIR	FFYSNN[412]GSQFYIR	2	Y	2	1	12	GAS1-N40GS	0	FALSE	0	0.99	FALSE	1
437	821.886	12	GAS1-N40GS		1	FFYSNNGSQFYIR	FFYSNN[437]GSQFYIR	2	Y	2	1	12	GAS1-N40GS	0	FALSE	0	0.99	FALSE	1
462	821.886	12	GAS1-N40GS		1	FFYSNNGSQFYIR	FFYSNN[462]GSQFYIR	2	Y	2	1	12	GAS1-N40GS	0	FALSE	0	0.99	FALSE	1
487	821.886	12	GAS1-N40GS		1	FFYSNNGSQFYIR	FFYSNN[487]GSQFYIR	2	Y	2	1	12	GAS1-N40GS	0	FALSE	0	0.99	FALSE	1
512	821.886	12	GAS1-N40GS		1	FFYSNNGSQFYIR	FFYSNN[512]GSQFYIR	2	Y	2	1	12	GAS1-N40GS	0	FALSE	0	0.99	FALSE	1
537	821.886	12	GAS1-N40GS		1	FFYSNNGSQFYIR	FFYSNN[537]GSQFYIR	2	Y	2	1	12	GAS1-N40GS	0	FALSE	0	0.99	FALSE	1
562	821.886	12	GAS1-N40GS		1	FFYSNNGSQFYIR	FFYSNN[562]GSQFYIR	2	Y	2	1	12	GAS1-N40GS	0	FALSE	0	0.99	FALSE	1
587	821.886	12	GAS1-N40GS		1	FFYSNNGSQFYIR	FFYSNN[587]GSQFYIR	2	Y	2	1	12	GAS1-N40GS	0	FALSE	0	0.99	FALSE	1
612	821.886	12	GAS1-N40GS		1	FFYSNNGSQFYIR	FFYSNN[612]GSQFYIR	2	Y	2	1	12	GAS1-N40GS	0	FALSE	0	0.99	FALSE	1
637	821.886	12	GAS1-N40GS		1	FFYSNNGSQFYIR	FFYSNN[637]GSQFYIR	2	Y	2	1	12	GAS1-N40GS	0	FALSE	0	0.99	FALSE	1
662	821.886	12	GAS1-N40GS		1	FFYSNNGSQFYIR	FFYSNN[662]GSQFYIR	2	Y	2	1	12	GAS1-N40GS	0	FALSE	0	0.99	FALSE	1
687	821.886	12	GAS1-N40GS		1	FFYSNNGSQFYIR	FFYSNN[687]GSQFYIR	2	Y	2	1	12	GAS1-N40GS	0	FALSE	0	0.99	FALSE	1
712	821.886	12	GAS1-N40GS		1	FFYSNNGSQFYIR	FFYSNN[712]GSQFYIR	2	Y	2	1	12	GAS1-N40GS	0	FALSE	0	0.99	FALSE	1
737	821.886	12	GAS1-N40GS		1	FFYSNNGSQFYIR	FFYSNN[737]GSQFYIR	2	Y	2	1	12	GAS1-N40GS	0	FALSE	0	0.99	FALSE	1
762	821.886	12	GAS1-N40GS		1	FFYSNNGSQFYIR	FFYSNN[762]GSQFYIR	2	Y	2	1	12	GAS1-N40GS	0	FALSE	0	0.99	FALSE	1
787	821.886	12	GAS1-N40GS		1	FFYSNNGSQFYIR	FFYSNN[787]GSQFYIR	2	Y	2	1	12	GAS1-N40GS	0	FALSE	0	0.99	FALSE	1
812	821.886	12	GAS1-N40GS		1	FFYSNNGSQFYIR	FFYSNN[812]GSQFYIR	2	Y	2	1	12	GAS1-N40GS	0	FALSE	0	0.99	FALSE	1
837	821.886	12	GAS1-N40GS		1	FFYSNNGSQFYIR	FFYSNN[837]GSQFYIR	2	Y	2	1	12	GAS1-N40GS	0	FALSE	0	0.99	FALSE	1
862	821.886	12	GAS1-N40GS		1	FFYSNNGSQFYIR	FFYSNN[862]GSQFYIR	2	Y	2	1	12	GAS1-N40GS	0	FALSE	0	0.99	FALSE	1
887	821.886	12	GAS1-N40GS		1	FFYSNNGSQFYIR	FFYSNN[887]GSQFYIR	2	Y	2	1	12	GAS1-N40GS	0	FALSE	0	0.99	FALSE	1
912	821.886	12	GAS1-N40GS		1	FFYSNNGSQFYIR	FFYSNN[912]GSQFYIR	2	Y	2	1	12	GAS1-N40GS	0	FALSE	0	0.99	FALSE	1
937	821.886	12	GAS1-N40GS		1	FFYSNNGSQFYIR	FFYSNN[937]GSQFYIR	2	Y	2	1	12	GAS1-N40GS	0	FALSE	0	0.99	FALSE	1
962	821.886	12	GAS1-N40GS		1	FFYSNNGSQFYIR	FFYSNN[962]GSQFYIR	2	Y	2	1	12	GAS1-N40GS	0	FALSE	0	0.99	FALSE	1
987	821.886	12	GAS1-N40GS		1	FFYSNNGSQFYIR	FFYSNN[987]GSQFYIR	2	Y	2	1	12	GAS1-N40GS	0	FALSE	0	0.99	FALSE	1
1012	821.886	12	GAS1-N40GS		1	FFYSNNGSQFYIR	FFYSNN[1012]GSQFYIR	2	Y	2	1	12	GAS1-N40GS	0	FALSE	0	0.99	FALSE	1
1037	821.886	12	GAS1-N40GS		1	FFYSNNGSQFYIR	FFYSNN[1037]GSQFYIR	2	Y	2	1	12	GAS1-N40GS	0	FALSE	0	0.99	FALSE	1
1062	821.886	12	GAS1-N40GS		1	FFYSNNGSQFYIR	FFYSNN[1062]GSQFYIR	2	Y	2	1	12	GAS1-N40GS	0	FALSE	0	0.99	FALSE	1
1087	821.886	12	GAS1-N40GS		1	FFYSNNGSQFYIR	FFYSNN[1087]GSQFYIR	2	Y	2	1	12	GAS1-N40GS	0	FALSE	0	0.99	FALSE	1
1112	821.886	12	GAS1-N40GS		1	FFYSNNGSQFYIR	FFYSNN[1112]GSQFYIR	2	Y	2	1	12	GAS1-N40GS	0	FALSE	0	0.99	FALSE	1
1137	821.886	12	GAS1-N40GS		1	FFYSNNGSQFYIR	FFYSNN[1137]GSQFYIR	2	Y	2	1	12	GAS1-N40GS	0	FALSE	0	0.99	FALSE	1
1162	821.886	12	GAS1-N40GS		1	FFYSNNGSQFYIR	FFYSNN[1162]GSQFYIR	2	Y	2	1	12	GAS1-N40GS	0	FALSE	0	0.99	FALSE	1
1187	821.886	12	GAS1-N40GS		1	FFYSNNGSQFYIR	FFYSNN[1187]GSQFYIR	2	Y	2	1	12	GAS1-N40GS	0	FALSE	0	0.99	FALSE	1
1212	821.886	12	GAS1-N40GS		1	FFYSNNGSQFYIR	FFYSNN[1212]GSQFYIR	2	Y	2	1	12	GAS1-N40GS	0	FALSE	0	0.99	FALSE	1
1237	821.886	12	GAS1-N40GS		1	FFYSNNGSQFYIR	FFYSNN[1237]GSQFYIR	2	Y	2	1	12	GAS1-N40GS	0	FALSE	0	0.99	FALSE	1
412.5	923.426	12	GAS1-N40GS		1	FFYSNNGSQFYIR	FFYSNN[412]GSQFYIR	2	Y	2	2	12	GAS1-N40GS	0	FALSE	0	0.99	FALSE	1
437	923.426	12	GAS1-N40GS		1	FFYSNNGSQFYIR	FFYSNN[437]GSQFYIR	2	Y	2	2	12	GAS1-N40GS	0	FALSE	0	0.99	FALSE	1
462	923.426	12	GAS1-N40GS		1	FFYSNNGSQFYIR	FFYSNN[462]GSQFYIR	2	Y	2	2	12	GAS1-N40GS	0	FALSE	0	0.99	FALSE	1
487	923.426	12	GAS1-N40GS		1	FFYSNNGSQFYIR	FFYSNN[487]GSQFYIR	2	Y	2	2	12	GAS1-N40GS	0	FALSE	0	0.99	FALSE	1
512	923.426	12	GAS1-N40GS		1	FFYSNNGSQFYIR	FFYSNN[512]GSQFYIR	2	Y	2	2	12	GAS1-N40GS	0	FALSE	0	0.99	FALSE	1
537	923.426	12	GAS1-N40GS		1	FFYSNNGSQFYIR	FFYSNN[537]GSQFYIR	2	Y	2	2	12	GAS1-N40GS	0	FALSE	0	0.99	FALSE	1
562	923.426	12	GAS1-N40GS		1	FFYSNNGSQFYIR	FFYSNN[562]GSQFYIR	2	Y	2	2	12	GAS1-N40GS	0	FALSE	0	0.99	FALSE	1
587	923.426	12	GAS1-N40GS		1	FFYSNNGSQFYIR	FFYSNN[587]GSQFYIR	2	Y	2	2	12	GAS1-N40GS	0	FALSE	0	0.99	FALSE	1
612	923.426	12	GAS1-N40GS		1	FFYSNNGSQFYIR	FFYSNN[612]GSQFYIR	2	Y	2	2	12	GAS1-N40GS	0	FALSE	0	0.99	FALSE	1
637	923.426	12	GAS1-N40GS		1	FFYSNNGSQFYIR	FFYSNN[637]GSQFYIR	2	Y	2	2	12	GAS1-N40GS	0	FALSE	0	0.99	FALSE	1
662	923.426	12	GAS1-N40GS		1	FFYSNNGSQFYIR	FFYSNN[662]GSQFYIR	2	Y	2	2	12	GAS1-N40GS	0	FALSE	0	0.99	FALSE	1
687	923.426	12	GAS1-N40GS		1	FFYSNNGSQFYIR	FFYSNN[687]GSQFYIR	2	Y	2	2	12	GAS1-N40GS	0	FALSE	0	0.99	FALSE	1
712	923.426	12	GAS1-N40GS		1	FFYSNNGSQFYIR	FFYSNN[712]GSQFYIR	2	Y	2	2	12	GAS1-N40GS	0	FALSE	0	0.99	FALSE	1
737	923.426	12	GAS1-N40GS		1	FFYSNNGSQFYIR	FFYSNN[737]GSQFYIR	2	Y	2	2	12	GAS1-N40GS	0	FALSE	0	0.99	FALSE	1
762	923.426	12	GAS1-N40GS		1	FFYSNNGSQFYIR	FFYSNN[762]GSQFYIR	2	Y	2	2	12	GAS1-N40GS	0	FALSE	0	0.99	FALSE	1
787	923.426	12	GAS1-N40GS		1	FFYSNNGSQFYIR	FFYSNN[787]GSQFYIR	2	Y	2	2	12	GAS1-N40GS	0	FALSE	0	0.99	FALSE	1
812	923.426	12	GAS1-N40GS		1	FFYSNNGSQFYIR	FFYSNN[812]GSQFYIR	2	Y	2	2	12	GAS1-N40GS	0	FALSE	0	0.99	FALSE	1
837	923.426	12	GAS1-N40GS		1	FFYSNNGSQFYIR	FFYSNN[837]GSQFYIR	2	Y	2	2	12	GAS1-N40GS	0	FALSE	0	0.99	FALSE	1
862	923.426	12	GAS1-N40GS		1	FFYSNNGSQFYIR	FFYSNN[862]GSQFYIR	2	Y	2	2	12	GAS1-N40GS	0	FALSE	0	0.99	FALSE	1
887	923.426	12	GAS1-N40GS		1	FFYSNNGSQFYIR	FFYSNN[887]GSQFYIR	2	Y	2	2	12	GAS1-N40GS	0	FALSE	0	0.99	FALSE	1
912	923.426	12	GAS1-N40GS		1	FFYSNNGSQFYIR	FFYSNN[912]GSQFYIR	2	Y	2	2	12	GAS1-N40GS	0	FALSE	0	0.99	FALSE	1
937	923.426	12	GAS1-N40GS		1	FFYSNNGSQFYIR	FFYSNN[937]GSQFYIR	2	Y	2	2	12	GAS1-N40GS	0	FALSE	0	0.99	FALSE	1
962	923.426	12	GAS1-N40GS		1	FFYSNNGSQFYIR	FFYSNN[962]GSQFYIR	2	Y	2	2	12	GAS1-N40GS	0	FALSE	0	0.99	FALSE	1
987	923.426	12	GAS1-N40GS		1	FFYSNNGSQFYIR	FFYSNN[987]GSQFYIR	2	Y	2	2	12	GAS1-N40GS	0	FALSE	0	0.99	FALSE	1
1012	923.426	12	GAS1-N40GS		1	FFYSNNGSQFYIR	FFYSNN[1012]GSQFYIR	2	Y	2	2	12	GAS1-N40GS	0	FALSE	0	0.99	FALSE	1
1037	923.426	12	GAS1-N40GS		1	FFYSNNGSQFYIR	FFYSNN[1037]GSQFYIR	2	Y	2	2	12	GAS1-N40GS	0	FALSE	0	0.99	FALSE	1
1062	923.426	12	GAS1-N40GS		1	FFYSNNGSQFYIR	FFYSNN[1062]GSQFYIR	2	Y	2	2	12	GAS1-N40GS	0	FALSE	0	0.99	FALSE	1
1087	923.426	12	GAS1-N40GS		1	FFYSNNGSQFYIR	FFYSNN[1087]GSQFYIR	2	Y	2	2	12	GAS1-N40GS	0	FALSE	0	0.99	FALSE	1
1112	923.426	12	GAS1-N40GS		1	FFYSNNGSQFYIR	FFYSNN[1112]GSQFYIR	2	Y	2	2	12	GAS1-N40GS	0	FALSE	0	0.99	FALSE	1
1137	923.426	12	GAS1-N40GS		1	FFYSNNGSQFYIR	FFYSNN[1137]GSQFYIR	2	Y	2	2	12	GAS1-N40GS	0	FALSE	0	0.99	FALSE	1
1162	923.426	12	GAS1-N40GS		1	FFYSNNGSQFYIR	FFYSNN[1162]GSQFYIR	2	Y	2	2	12	GAS1-N40GS	0	FALSE	0	0.99	FALSE	1
1187	923.426	12	GAS1-N40GS		1	FFYSNNGSQFYIR	FFYSNN[1187]GSQFYIR	2	Y	2	2	12	GAS1-N40GS	0	FALSE	0	0.99	FALSE	1
1212	923.426	12	GAS1-N40GS		1	FFYSNNGSQFYIR	FFYSNN[1212]GSQFYIR	2	Y	2	2	12	GAS1-N40GS	0	FALSE	0	0.99	FALSE	1
1237	923.426	12	GAS1-N40GS		1	FFYSNNGSQFYIR	FFYSNN[1237]GSQFYIR	2	Y	2	2	12	GAS1-N40GS	0	FALSE	0	0.99	FALSE	1
412.5	1024.97	12	GAS1-N40GS		1	FFYSNNGSQFYIR	FFYSNN[412]GSQFYIR	2	Y	2	3	12	GAS1-N40GS	0	FALSE	0	0.99	FALSE	1
437	1024.97	12	GAS1-N40GS		1	FFYSNNGSQFYIR	FFYSNN[437]GSQFYIR	2	Y	2	3	12	GAS1-N40GS	0	FALSE	0	0.99	FALSE	1
462	1024.97	12	GAS1-N40GS		1	FFYSNNGSQFYIR	FFYSNN[462]GSQFYIR	2	Y	2	3	12	GAS1-N40GS	0	FALSE	0	0.99	FALSE	1
487	1024.97	12	GAS1-N40GS		1	FFYSNNGSQFYIR	FFYSNN[487]GSQFYIR	2	Y	2	3	12	GAS1-N40GS	0	FALSE	0	0.99	FALSE	1
512	1024.97	12	GAS1-N40GS		1	FFYSNNGSQFYIR	FFYSNN[512]GSQFYIR	2	Y	2	3	12	GAS1-N40GS	0	FALSE	0	0.99	FALSE	1
537	1024.97	12	GAS1-N40GS		1	FFYSNNGSQFYIR	FFYSNN[537]GSQFYIR	2	Y	2	3	12	GAS1-N40GS	0	FALSE	0	0.99	FALSE	1
562	1024.97	12	GAS1-N40GS		1	FFYSNNGSQFYIR	FFYSNN[562]GSQFYIR	2	Y	2	3	12	GAS1-N40GS	0	FALSE	0	0.99	FALSE	1
587	1024.97	12	GAS1-N40GS		1	FFYSNNGSQFYIR	FFYSNN[587]GSQFYIR	2	Y	2	3	12	GAS1-N40GS	0	FALSE	0	0.99	FALSE	1
612	1024.97	12	GAS1-N40GS		1	FFYSNNGSQFYIR	FFYSNN[612]GSQFYIR	2	Y	2	3	12	GAS1-N40GS	0	FALSE	0	0.99	FALSE	1
637	1024.97	12	GAS1-N40GS		1	FFYSNNGSQFYIR	FFYSNN[637]GSQFYIR	2	Y	2	3	12	GAS1-N40GS	0	FALSE	0	0.99	FALSE	1
662	1024.97	12	GAS1-N40GS		1	FFYSNNGSQFYIR	FFYSNN[662]GSQFYIR	2	Y	2	3	12	GAS1-N40GS	0	FALSE	0	0.99	FALSE	1
687	1024.97	12	GAS1-N40GS		1	FFYSNNGSQFYIR	FFYSNN[687]GSQFYIR	2	Y	2	3	12	GAS1-N40GS	0	FALSE	0	0.99	FALSE	1
712	1024.97	12	GAS1-N40GS		1	FFYSNNGSQFYIR	FFYSNN[712]GSQFYIR	2	Y	2	3	12	GAS1-N40GS	0	FALSE	0	0.99	FALSE	1
737	1024.97	12	GAS1-N40GS		1	FFYSNNGSQFYIR	FFYSNN[737]GSQFYIR	2	Y	2	3	12	GAS1-N40GS	0	FALSE	0	0.99	FALSE	1
762	1024.97	12	GAS1-N40GS		1	FFYSNNGSQFYIR	FFYSNN[762]GSQFYIR	2	Y	2	3	12	GAS1-N40GS	0	FALSE	0	0.99	FALSE	1
787	1024.97	12	GAS1-N40GS		1	FFYSNNGSQFYIR	FFYSNN[787]GSQFYIR	2	Y	2	3	12	GAS1-N40GS	0	FALSE	0	0.99	FALSE	1
812	1024.97	12	GAS1-N40GS		1	FFYSNNGSQFYIR	FFYSNN[812]GSQFYIR	2	Y	2	3	12	GAS1-N40GS	0	FALSE	0	0.99	FALSE	1
837	1024.97	12	GAS1-N40GS		1	FFYSNNGSQFYIR	FFYSNN[837]GSQFYIR	2	Y	2	3	12	GAS1-N40GS	0	FALSE	0	0.99	FALSE	1
862	1024.97	12	GAS1-N40GS		1	FFYSNNGSQFYIR	FFYSNN[862]GSQFYIR	2	Y	2	3	12	GAS1-N40GS	0	FALSE	0	0.99	FALSE	1
887	1024.97	12	GAS1-N40GS		1	FFYSNNGSQFYIR	FFYSNN[887]GSQFYIR	2	Y	2	3	12	GAS1-N40GS	0	FALSE	0	0.99	FALSE	1
912	1024.97	12	GAS1-N40GS		1	FFYSNNGSQFYIR	FFYSNN[912]GSQFYIR	2	Y	2	3	12	GAS1-N40GS	0	FALSE	0	0.99	FALSE	1
937	1024.97	12	GAS1-N40GS		1	FFYSNNGSQFYIR	FFYSNN[937]GSQFYIR	2	Y	2	3	12	GAS1-N40GS	0	FALSE	0	0.99	FALSE	1
962	1024.97	12	GAS1-N40GS		1	FFYSNNGSQFYIR	FFYSNN[962]GSQFYIR	2	Y	2	3	12	GAS1-N40GS	0	FALSE	0	0.99	FALSE	1
987	1024.97	12	GAS1-N40GS		1	FFYSNNGSQFYIR	FFYSNN[987]GSQFYIR	2	Y	2	3	12	GAS1-N40GS	0	FALSE	0	0.99	FALSE	1
1012	1024.97	12	GAS1-N40GS		1	FFYSNNGSQFYIR	FFYSNN[1012]GSQFYIR	2	Y	2	3	12	GAS1-N40GS	0	FALSE	0	0.99	FALSE	1
1037	1024.97	12	GAS1-N40GS		1	FFYSNNGSQFYIR	FFYSNN[1037]GSQFYIR	2	Y	2	3	12	GAS1-N40GS	0	FALSE	0	0.99	FALSE	1
1062	1024.97	12	GAS1-N40GS		1	FFYSNNGSQFYIR	FFYSNN[1062]GSQFYIR	2	Y	2	3	12	GAS1-N40GS	0	FALSE	0	0.99	FALSE	1
1087	1024.97	12	GAS1-N40GS		1	FFYSNNGSQFYIR	FFYSNN[1087]GSQFYIR	2	Y	2	3	12	GAS1-N40GS	0	FALSE	0	0.99	FALSE	1
1112	1024.97	12	GAS1-N40GS		1	FFYSNNGSQFYIR	FFYSNN[1112]GSQFYIR	2	Y	2	3	12	GAS1-N40GS	0	FALSE	0	0.99	FALSE	1
1137	1024.97	12	GAS1-N40GS		1	FFYSNNGSQFYIR	FFYSNN[1137]GSQFYIR	2	Y	2	3	12	GAS1-N40GS	0	FALSE	0	0.99	FALSE	1
1162	1024.97	12	GAS1-N40GS		1	FFYSNNGSQFYIR	FFYSNN[1162]GSQFYIR	2	Y	2	3	12	GAS1-N40GS	0	FALSE	0	0.99	FALSE	1
1187	1024.97	12	GAS1-N40GS		1	FFYSNNGSQFYIR	FFYSNN[1187]GSQFYIR	2	Y	2	3	12	GAS1-N40GS	0	FALSE	0	0.99	FALSE	1
1212	1024.97	12	GAS1-N40GS		1	FFYSNNGSQFYIR	FFYSNN[1212]GSQFYIR	2	Y	2	3	12	GAS1-N40GS	0	FALSE	0	0.99	FALSE	1
1237	1024.97	12	GAS1-N40GS		1	FFYSNNGSQFYIR	FFYSNN[1237]GSQFYIR	2	Y	2	3	12	GAS1-N40GS	0	FALSE	0	0.99	FALSE	1
412.5	1546.18	12	GAS1-N57ET		1	GVAYQADTANETSGSTVNDPLANYESCSR	GVAYQADTAN[412]ETSGSTVNDPLANYESC[PPa]SR	2	Y	2	1	12	GAS1-N57ET	0	FALSE	0	0.99	FALSE	1
437	1546.18	12	GAS1-N57ET		1	GVAYQADTANETSGSTVNDPLANYESCSR	GVAYQADTAN[437]ETSGSTVNDPLANYESC[PPa]SR	2	Y	2	1	12	GAS1-N57ET	0	FALSE	0	0.99	FALSE	1
462	1546.18	12	GAS1-N57ET		1	GVAYQADTANETSGSTVNDPLANYESCSR	GVAYQADTAN[462]ETSGSTVNDPLANYESC[PPa]SR	2	Y	2	1	12	GAS1-N57ET	0	FALSE	0	0.99	FALSE	1
487	1546.18	12	GAS1-N57ET		1	GVAYQADTANETSGSTVNDPLANYESCSR	GVAYQADTAN[487]ETSGSTVNDPLANYESC[PPa]SR	2	Y	2	1	12	GAS1-N57ET	0	FALSE	0	0.99	FALSE	1
512	1546.18	12	GAS1-N57ET		1	GVAYQADTANETSGSTVNDPLANYESCSR	GVAYQADTAN[512]ETSGSTVNDPLANYESC[PPa]SR	2	Y	2	1	12	GAS1-N57ET	0	FALSE	0	0.99	FALSE	1
537	1546.18	12	GAS1-N57ET		1	GVAYQADTANETSGSTVNDPLANYESCSR	GVAYQADTAN[537]ETSGSTVNDPLANYESC[PPa]SR	2	Y	2	1	12	GAS1-N57ET	0	FALSE	0	0.99	FALSE	1
562	1546.18	12	GAS1-N57ET		1	GVAYQADTANETSGSTVNDPLANYESCSR	GVAYQADTAN[562]ETSGSTVNDPLANYESC[PPa]SR	2	Y	2	1	12	GAS1-N57ET	0	FALSE	0	0.99	FALSE	1
587	1546.18	12	GAS1-N57ET		1	GVAYQADTANETSGSTVNDPLANYESCSR	GVAYQADTAN[587]ETSGSTVNDPLANYESC[PPa]SR	2	Y	2	1	12	GAS1-N57ET	0	FALSE	0	0.99	FALSE	1
612	1546.18	12	GAS1-N57ET		1	GVAYQADTANETSGSTVNDPLANYESCSR	GVAYQADTAN[612]ETSGSTVNDPLANYESC[PPa]SR	2	Y	2	1	12	GAS1-N57ET	0	FALSE	0	0.99	FALSE	1
637	1546.18	12	GAS1-N57ET		1	GVAYQADTANETSGSTVNDPLANYESCSR	GVAYQADTAN[637]ETSGSTVNDPLANYESC[PPa]SR	2	Y	2	1	12	GAS1-N57ET	0	FALSE	0	0.99	FALSE	1
662	1546.18	12	GAS1-N57ET		1	GVAYQADTANETSGSTVNDPLANYESCSR	GVAYQADTAN[662]ETSGSTVNDPLANYESC[PPa]SR	2	Y	2	1	12	GAS1-N57ET	0	FALSE	0	0.99	FALSE	1
687	1546.18	12	GAS1-N57ET		1	GVAYQADTANETSGSTVNDPLANYESCSR	GVAYQADTAN[687]ETSGSTVNDPLANYESC[PPa]SR	2	Y	2	1	12	GAS1-N57ET	0	FALSE	0	0.99	FALSE	1
712	1546.18	12	GAS1-N57ET		1	GVAYQADTANETSGSTVNDPLANYESCSR	GVAYQADTAN[712]ETSGSTVNDPLANYESC[PPa]SR	2	Y	2	1	12	GAS1-N57ET	0	FALSE	0	0.99	FALSE	1
737	1546.18	12	GAS1-N57ET		1	GVAYQADTANETSGSTVNDPLANYESCSR	GVAYQADTAN[737]ETSGSTVNDPLANYESC[PPa]SR	2	Y	2	1	12	GAS1-N57ET	0	FALSE	0	0.99	FALSE	1
762	1546.18	12	GAS1-N57ET		1	GVAYQADTANETSGSTVNDPLANYESCSR	GVAYQADTAN[762]ETSGSTVNDPLANYESC[PPa]SR	2	Y	2	1	12	GAS1-N57ET	0	FALSE	0	0.99	FALSE	1
787	1546.18	12	GAS1-N57ET		1	GVAYQADTANETSGSTVNDPLANYESCSR	GVAYQADTAN[787]ETSGSTVNDPLANYESC[PPa]SR	2	Y	2	1	12	GAS1-N57ET	0	FALSE	0	0.99	FALSE	1
812	1546.18	12	GAS1-N57ET		1	GVAYQADTANETSGSTVNDPLANYESCSR	GVAYQADTAN[812]ETSGSTVNDPLANYESC[PPa]SR	2	Y	2	1	12	GAS1-N57ET	0	FALSE	0	0.99	FALSE	1
837	1546.18	12	GAS1-N57ET		1	GVAYQADTANETSGSTVNDPLANYESCSR	GVAYQADTAN[837]ETSGSTVNDPLANYESC[PPa]SR	2	Y	2	1	12	GAS1-N57ET	0	FALSE	0	0.99	FALSE	1
862	1546.18	12	GAS1-N57ET		1	GVAYQADTANETSGSTVNDPLANYESCSR	GVAYQADTAN[862]ETSGSTVNDPLANYESC[PPa]SR	2	Y	2	1	12	GAS1-N57ET	0	FALSE	0	0.99	FALSE	1
887	1546.18	12	GAS1-N57ET		1	GVAYQADTANETSGSTVNDPLANYESCSR	GVAYQADTAN[887]ETSGSTVNDPLANYESC[PPa]SR	2	Y	2	1	12	GAS1-N57ET	0	FALSE	0	0.99	FALSE	1
912	1546.18	12	GAS1-N57ET		1	GVAYQADTANETSGSTVNDPLANYESCSR	GVAYQADTAN[912]ETSGSTVNDPLANYESC[PPa]SR	2	Y	2	1	12	GAS1-N57ET	0	FALSE	0	0.99	FALSE	1
937	1546.18	12	GAS1-N57ET		1	GVAYQADTANETSGSTVNDPLANYESCSR	GVAYQADTAN[937]ETSGSTVNDPLANYESC[PPa]SR	2	Y	2	1	12	GAS1-N57ET	0	FALSE	0	0.99	FALSE	1
962	1546.18	12	GAS1-N57ET		1	GVAYQADTANETSGSTVNDPLANYESCSR	GVAYQADTAN[962]ETSGSTVNDPLANYESC[PPa]SR	2	Y	2	1	12	GAS1-N57ET	0	FALSE	0	0.99	FALSE	1
987	1546.18	12	GAS1-N57ET		1	GVAYQADTANETSGSTVNDPLANYESCSR	GVAYQADTAN[987]ETSGSTVNDPLANYESC[PPa]SR	2	Y	2	1	12	GAS1-N57ET	0	FALSE	0	0.99	FALSE	1
1012	1546.18	12	GAS1-N57ET		1	GVAYQADTANETSGSTVNDPLANYESCSR	GVAYQADTAN[1012]ETSGSTVNDPLANYESC[PPa]SR	2	Y	2	1	12	GAS1-N57ET	0	FALSE	0	0.99	FALSE	1
1037	1546.18	12	GAS1-N57ET		1	GVAYQADTANETSGSTVNDPLANYESCSR	GVAYQADTAN[1037]ETSGSTVNDPLANYESC[PPa]SR	2	Y	2	1	12	GAS1-N57ET	0	FALSE	0	0.99	FALSE	1
1062	1546.18	12	GAS1-N57ET		1	GVAYQADTANETSGSTVNDPLANYESCSR	GVAYQADTAN[1062]ETSGSTVNDPLANYESC[PPa]SR	2	Y	2	1	12	GAS1-N57ET	0	FALSE	0	0.99	FALSE	1
1087	1546.18	12	GAS1-N57ET		1	GVAYQADTANETSGSTVNDPLANYESCSR	GVAYQADTAN[1087]ETSGSTVNDPLANYESC[PPa]SR	2	Y	2	1	12	GAS1-N57ET	0	FALSE	0	0.99	FALSE	1
1112	1546.18	12	GAS1-N57ET		1	GVAYQADTANETSGSTVNDPLANYESCSR	GVAYQADTAN[1112]ETSGSTVNDPLANYESC[PPa]SR	2	Y	2	1	12	GAS1-N57ET	0	FALSE	0	0.99	FALSE	1
1137	1546.18	12	GAS1-N57ET		1	GVAYQADTANETSGSTVNDPLANYESCSR	GVAYQADTAN[1137]ETSGSTVNDPLANYESC[PPa]SR	2	Y	2	1	12	GAS1-N57ET	0	FALSE	0	0.99	FALSE	1
1162	1546.18	12	GAS1-N57ET		1	GVAYQADTANETSGSTVNDPLANYESCSR	GVAYQADTAN[1162]ETSGSTVNDPLANYESC[PPa]SR	2	Y	2	1	12	GAS1-N57ET	0	FALSE	0	0.99	FALSE	1
1187	1546.18	12	GAS1-N57ET		1	GVAYQADTANETSGSTVNDPLANYESCSR	GVAYQADTAN[1187]ETSGSTVNDPLANYESC[PPa]SR	2	Y	2	1	12	GAS1-N57ET	0	FALSE	0	0.99	FALSE	1
1212	1546.18	12	GAS1-N57ET		1	GVAYQADTANETSGSTVNDPLANYESCSR	GVAYQADTAN[1212]ETSGSTVNDPLANYESC[PPa]SR	2	Y	2	1	12	GAS1-N57ET	0	FALSE	0	0.99	FALSE	1
1237	1546.18	12	GAS1-N57ET		1	GVAYQADTANETSGSTVNDPLANYESCSR	GVAYQADTAN[1237]ETSGSTVNDPLANYESC[PPa]SR	2	Y	2	1	12	GAS1-N57ET	0	FALSE	0	0.99	FALSE	1
412.5	1647.72	12	GAS1-N57ET		1	GVAYQADTANETSGSTVNDPLANYESCSR	GVAYQADTAN[412]ETSGSTVNDPLANYESC[PPa]SR	2	Y	2	2	12	GAS1-N57ET	0	FALSE	0	0.99	FALSE	1
437	1647.72	12	GAS1-N57ET		1	GVAYQADTANETSGSTVNDPLANYESCSR	GVAYQADTAN[437]ETSGSTVNDPLANYESC[PPa]SR	2	Y	2	2	12	GAS1-N57ET	0	FALSE	0	0.99	FALSE	1
462	1647.72	12	GAS1-N57ET		1	GVAYQADTANETSGSTVNDPLANYESCSR	GVAYQADTAN[462]ETSGSTVNDPLANYESC[PPa]SR	2	Y	2	2	12	GAS1-N57ET	0	FALSE	0	0.99	FALSE	1
487	1647.72	12	GAS1-N57ET		1	GVAYQADTANETSGSTVNDPLANYESCSR	GVAYQADTAN[487]ETSGSTVNDPLANYESC[PPa]SR	2	Y	2	2	12	GAS1-N57ET	0	FALSE	0	0.99	FALSE	1
512	1647.72	12	GAS1-N57ET		1	GVAYQADTANETSGSTVNDPLANYESCSR	GVAYQADTAN[512]ETSGSTVNDPLANYESC[PPa]SR	2	Y	2	2	12	GAS1-N57ET	0	FALSE	0	0.99	FALSE	1
537	1647.72	12	GAS1-N57ET		1	GVAYQADTANETSGSTVNDPLANYESCSR	GVAYQADTAN[537]ETSGSTVNDPLANYESC[PPa]SR	2	Y	2	2	12	GAS1-N57ET	0	FALSE	0	0.99	FALSE	1
562	1647.72	12	GAS1-N57ET		1	GVAYQADTANETSGSTVNDPLANYESCSR	GVAYQADTAN[562]ETSGSTVNDPLANYESC[PPa]SR	2	Y	2	2	12	GAS1-N57ET	0	FALSE	0	0.99	FALSE	1
587	1647.72	12	GAS1-N57ET		1	GVAYQADTANETSGSTVNDPLANYESCSR	GVAYQADTAN[587]ETSGSTVNDPLANYESC[PPa]SR	2	Y	2	2	12	GAS1-N57ET	0	FALSE	0	0.99	FALSE	1
612	1647.72	12	GAS1-N57ET		1	GVAYQADTANETSGSTVNDPLANYESCSR	GVAYQADTAN[612]ETSGSTVNDPLANYESC[PPa]SR	2	Y	2	2	12	GAS1-N57ET	0	FALSE	0	0.99	FALSE	1
637	1647.72	12	GAS1-N57ET		1	GVAYQADTANETSGSTVNDPLANYESCSR	GVAYQADTAN[637]ETSGSTVNDPLANYESC[PPa]SR	2	Y	2	2	12	GAS1-N57ET	0	FALSE	0	0.99	FALSE	1
662	1647.72	12	GAS1-N57ET		1	GVAYQADTANETSGSTVNDPLANYESCSR	GVAYQADTAN[662]ETSGSTVNDPLANYESC[PPa]SR	2	Y	2	2	12	GAS1-N57ET	0	FALSE	0	0.99	FALSE	1
687	1647.72	12	GAS1-N57ET		1	GVAYQADTANETSGSTVNDPLANYESCSR	GVAYQADTAN[687]ETSGSTVNDPLANYESC[PPa]SR	2	Y	2	2	12	GAS1-N57ET	0	FALSE	0	0.99	FALSE	1
712	1647.72	12	GAS1-N57ET		1	GVAYQADTANETSGSTVNDPLANYESCSR	GVAYQADTAN[712]ETSGSTVNDPLANYESC[PPa]SR	2	Y	2	2	12	GAS1-N57ET	0	FALSE	0	0.99	FALSE	1
737	1647.72	12	GAS1-N57ET		1	GVAYQADTANETSGSTVNDPLANYESCSR	GVAYQADTAN[737]ETSGSTVNDPLANYESC[PPa]SR	2	Y	2	2	12	GAS1-N57ET	0	FALSE	0	0.99	FALSE	1
762	1647.72	12	GAS1-N57ET		1	GVAYQADTANETSGSTVNDPLANYESCSR	GVAYQADTAN[762]ETSGSTVNDPLANYESC[PPa]SR	2	Y	2	2	12	GAS1-N57ET	0	FALSE	0	0.99	FALSE	1
787	1647.72	12	GAS1-N57ET		1	GVAYQADTANETSGSTVNDPLANYESCSR	GVAYQADTAN[787]ETSGSTVNDPLANYESC[PPa]SR	2	Y	2	2	12	GAS1-N57ET	0	FALSE	0	0.99	FALSE	1
812	1647.72	12	GAS1-N57ET		1	GVAYQADTANETSGSTVNDPLANYESCSR	GVAYQADTAN[812]ETSGSTVNDPLANYESC[PPa]SR	2	Y	2	2	12	GAS1-N57ET	0	FALSE	0	0.99	FALSE	1
837	1647.72	12	GAS1-N57ET		1	GVAYQADTANETSGSTVNDPLANYESCSR	GVAYQADTAN[837]ETSGSTVNDPLANYESC[PPa]SR	2	Y	2	2	12	GAS1-N57ET	0	FALSE	0	0.99	FALSE	1
862	1647.72	12	GAS1-N57ET		1	GVAYQADTANETSGSTVNDPLANYESCSR	GVAYQADTAN[862]ETSGSTVNDPLANYESC[PPa]SR	2	Y	2	2	12	GAS1-N57ET	0	FALSE	0	0.99	FALSE	1
887	1647.72	12	GAS1-N57ET		1	GVAYQADTANETSGSTVNDPLANYESCSR	GVAYQADTAN[887]ETSGSTVNDPLANYESC[PPa]SR	2	Y	2	2	12	GAS1-N57ET	0	FALSE	0	0.99	FALSE	1
912	1647.72	12	GAS1-N57ET		1	GVAYQADTANETSGSTVNDPLANYESCSR	GVAYQADTAN[912]ETSGSTVNDPLANYESC[PPa]SR	2	Y	2	2	12	GAS1-N57ET	0	FALSE	0	0.99	FALSE	1
937	1647.72	12	GAS1-N57ET		1	GVAYQADTANETSGSTVNDPLANYESCSR	GVAYQADTAN[937]ETSGSTVNDPLANYESC[PPa]SR	2	Y	2	2	12	GAS1-N57ET	0	FALSE	0	0.99	FALSE	1
962	1647.72	12	GAS1-N57ET		1	GVAYQADTANETSGSTVNDPLANYESCSR	GVAYQADTAN[962]ETSGSTVNDPLANYESC[PPa]SR	2	Y	2	2	12	GAS1-N57ET	0	FALSE	0	0.99	FALSE	1
987	1647.72	12	GAS1-N57ET		1	GVAYQADTANETSGSTVNDPLANYESCSR	GVAYQADTAN[987]ETSGSTVNDPLANYESC[PPa]SR	2	Y	2	2	12	GAS1-N57ET	0	FALSE	0	0.99	FALSE	1
1012	1647.72	12	GAS1-N57ET		1	GVAYQADTANETSGSTVNDPLANYESCSR	GVAYQADTAN[1012]ETSGSTVNDPLANYESC[PPa]SR	2	Y	2	2	12	GAS1-N57ET	0	FALSE	0	0.99	FALSE	1
1037	1647.72	12	GAS1-N57ET		1	GVAYQADTANETSGSTVNDPLANYESCSR	GVAYQADTAN[1037]ETSGSTVNDPLANYESC[PPa]SR	2	Y	2	2	12	GAS1-N57ET	0	FALSE	0	0.99	FALSE	1
1062	1647.72	12	GAS1-N57ET		1	GVAYQADTANETSGSTVNDPLANYESCSR	GVAYQADTAN[1062]ETSGSTVNDPLANYESC[PPa]SR	2	Y	2	2	12	GAS1-N57ET	0	FALSE	0	0.99	FALSE	1
1087	1647.72	12	GAS1-N57ET		1	GVAYQADTANETSGSTVNDPLANYESCSR	GVAYQADTAN[1087]ETSGSTVNDPLANYESC[PPa]SR	2	Y	2	2	12	GAS1-N57ET	0	FALSE	0	0.99	FALSE	1
1112	1647.72	12	GAS1-N57ET		1	GVAYQADTANETSGSTVNDPLANYESCSR	GVAYQADTAN[1112]ETSGSTVNDPLANYESC[PPa]SR	2	Y	2	2	12	GAS1-N57ET	0	FALSE	0	0.99	FALSE	1
1137	1647.72	12	GAS1-N57ET		1	GVAYQADTANETSGSTVNDPLANYESCSR	GVAYQADTAN[1137]ETSGSTVNDPLANYESC[PPa]SR	2	Y	2	2	12	GAS1-N57ET	0	FALSE	0	0.99	FALSE	1
1162	1647.72	12	GAS1-N57ET		1	GVAYQADTANETSGSTVNDPLANYESCSR	GVAYQADTAN[1162]ETSGSTVNDPLANYESC[PPa]SR	2	Y	2	2	12	GAS1-N57ET	0	FALSE	0	0.99	FALSE	1
1187	1647.72	12	GAS1-N57ET		1	GVAYQADTANETSGSTVNDPLANYESCSR	GVAYQADTAN[1187]ETSGSTVNDPLANYESC[PPa]SR	2	Y	2	2	12	GAS1-N57ET	0	FALSE	0	0.99	FALSE	1
1212	1647.72	12	GAS1-N57ET		1	GVAYQADTANETSGSTVNDPLANYESCSR	GVAYQADTAN[1212]ETSGSTVNDPLANYESC[PPa]SR	2	Y	2	2	12	GAS1-N57ET	0	FALSE	0	0.99	FALSE	1
1237	1647.72	12	GAS1-N57ET		1	GVAYQADTANETSGSTVNDPLANYESCSR	GVAYQADTAN[1237]ETSGSTVNDPLANYESC[PPa]SR	2	Y	2	2	12	GAS1-N57ET	0	FALSE	0	0.99	FALSE	1
412.5	1749.26	12	GAS1-N57ET		1	GVAYQADTANETSGSTVNDPLANYESCSR	GVAYQADTAN[412]ETSGSTVNDPLANYESC[PPa]SR	2	Y	2	3	12	GAS1-N57ET	0	FALSE	0	0.99	FALSE	1
437	1749.26	12	GAS1-N57ET		1	GVAYQADTANETSGSTVNDPLANYESCSR	GVAYQADTAN[437]ETSGSTVNDPLANYESC[PPa]SR	2	Y	2	3	12	GAS1-N57ET	0	FALSE	0	0.99	FALSE	1
462	1749.26	12	GAS1-N57ET		1	GVAYQADTANETSGSTVNDPLANYESCSR	GVAYQADTAN[462]ETSGSTVNDPLANYESC[PPa]SR	2	Y	2	3	12	GAS1-N57ET	0	FALSE	0	0.99	FALSE	1
487	1749.26	12	GAS1-N57ET		1	GVAYQADTANETSGSTVNDPLANYESCSR	GVAYQADTAN[487]ETSGSTVNDPLANYESC[PPa]SR	2	Y	2	3	12	GAS1-N57ET	0	FALSE	0	0.99	FALSE	1
512	1749.26	12	GAS1-N57ET		1	GVAYQADTANETSGSTVNDPLANYESCSR	GVAYQADTAN[512]ETSGSTVNDPLANYESC[PPa]SR	2	Y	2	3	12	GAS1-N57ET	0	FALSE	0	0.99	FALSE	1
537	1749.26	12	GAS1-N57ET		1	GVAYQADTANETSGSTVNDPLANYESCSR	GVAYQADTAN[537]ETSGSTVNDPLANYESC[PPa]SR	2	Y	2	3	12	GAS1-N57ET	0	FALSE	0	0.99	FALSE	1
562	1749.26	12	GAS1-N57ET		1	GVAYQADTANETSGSTVNDPLANYESCSR	GVAYQADTAN[562]ETSGSTVNDPLANYESC[PPa]SR	2	Y	2	3	12	GAS1-N57ET	0	FALSE	0	0.99	FALSE	1
587	1749.26	12	GAS1-N57ET		1	GVAYQADTANETSGSTVNDPLANYESCSR	GVAYQADTAN[587]ETSGSTVNDPLANYESC[PPa]SR	2	Y	2	3	12	GAS1-N57ET	0	FALSE	0	0.99	FALSE	1
612	1749.26	12	GAS1-N57ET		1	GVAYQADTANETSGSTVNDPLANYESCSR	GVAYQADTAN[612]ETSGSTVNDPLANYESC[PPa]SR	2	Y	2	3	12	GAS1-N57ET	0	FALSE	0	0.99	FALSE	1
637	1749.26	12	GAS1-N57ET		1	GVAYQADTANETSGSTVNDPLANYESCSR	GVAYQADTAN[637]ETSGSTVNDPLANYESC[PPa]SR	2	Y	2	3	12	GAS1-N57ET	0	FALSE	0	0.99	FALSE	1
662	1749.26	12	GAS1-N57ET		1	GVAYQADTANETSGSTVNDPLANYESCSR	GVAYQADTAN[662]ETSGSTVNDPLANYESC[PPa]SR	2	Y	2	3	12	GAS1-N57ET	0	FALSE	0	0.99	FALSE	1
687	1749.26	12	GAS1-N57ET		1	GVAYQADTANETSGSTVNDPLANYESCSR	GVAYQADTAN[687]ETSGSTVNDPLANYESC[PPa]SR	2	Y	2	3	12	GAS1-N57ET	0	FALSE	0	0.99	FALSE	1
712	1749.26	12	GAS1-N57ET		1	GVAYQADTANETSGSTVNDPLANYESCSR	GVAYQADTAN[712]ETSGSTVNDPLANYESC[PPa]SR	2	Y	2	3	12	GAS1-N57ET	0	FALSE	0	0.99	FALSE	1
737	1749.26	12	GAS1-N57ET		1	GVAYQADTANETSGSTVNDPLANYESCSR	GVAYQADTAN[737]ETSGSTVNDPLANYESC[PPa]SR	2	Y	2	3	12	GAS1-N57ET	0	FALSE	0	0.99	FALSE	1
762	1749.26	12	GAS1-N57ET		1	GVAYQADTANETSGSTVNDPLANYESCSR	GVAYQADTAN[762]ETSGSTVNDPLANYESC[PPa]SR	2	Y	2	3	12	GAS1-N57ET	0	FALSE	0	0.99	FALSE	1
787	1749.26	12	GAS1-N57ET		1	GVAYQADTANETSGSTVNDPLANYESCSR	GVAYQADTAN[787]ETSGSTVNDPLANYESC[PPa]SR	2	Y	2	3	12	GAS1-N57ET	0	FALSE	0	0.99	FALSE	1
812	1749.26	12	GAS1-N57ET		1	GVAYQADTANETSGSTVNDPLANYESCSR	GVAYQADTAN[812]ETSGSTVNDPLANYESC[PPa]SR	2	Y	2	3	12	GAS1-N57ET	0	FALSE	0	0.99	FALSE	1
837	1749.26	12	GAS1-N57ET		1	GVAYQADTANETSGSTVNDPLANYESCSR	GVAYQADTAN[837]ETSGSTVNDPLANYESC[PPa]SR	2	Y	2	3	12	GAS1-N57ET	0	FALSE	0	0.99	FALSE	1
862	1749.26	12	GAS1-N57ET		1	GVAYQADTANETSGSTVNDPLANYESCSR	GVAYQADTAN[862]ETSGSTVNDPLANYESC[PPa]SR	2	Y	2	3	12	GAS1-N57ET	0	FALSE	0	0.99	FALSE	1
887	1749.26	12	GAS1-N57ET		1	GVAYQADTANETSGSTVNDPLANYESCSR	GVAYQADTAN[887]ETSGSTVNDPLANYESC[PPa]SR	2	Y	2	3	12	GAS1-N57ET	0	FALSE	0	0.99	FALSE	1
912	1749.26	12	GAS1-N57ET		1	GVAYQADTANETSGSTVNDPLANYESCSR	GVAYQADTAN[912]ETSGSTVNDPLANYESC[PPa]SR	2	Y	2	3	12	GAS1-N57ET	0	FALSE	0	0.99	FALSE	1
937	1749.26	12	GAS1-N57ET		1	GVAYQADTANETSGSTVNDPLANYESCSR	GVAYQADTAN[937]ETSGSTVNDPLANYESC[PPa]SR	2	Y	2	3	12	GAS1-N57ET	0	FALSE	0	0.99	FALSE	1
962	1749.26	12	GAS1-N57ET		1	GVAYQADTANETSGSTVNDPLANYESCSR	GVAYQADTAN[962]ETSGSTVNDPLANYESC[PPa]SR	2	Y	2	3	12	GAS1-N57ET	0	FALSE	0	0.99	FALSE	1
987	1749.26	12	GAS1-N57ET		1	GVAYQADTANETSGSTVNDPLANYESCSR	GVAYQADTAN[987]ETSGSTVNDPLANYESC[PPa]SR	2	Y	2	3	12	GAS1-N57ET	0	FALSE	0	0.99	FALSE	1
1012	1749.26	12	GAS1-N57ET		1	GVAYQADTANETSGSTVNDPLANYESCSR	GVAYQADTAN[1012]ETSGSTVNDPLANYESC[PPa]SR	2	Y	2	3	12	GAS1-N57ET	0	FALSE	0	0.99	FALSE	1
1037	1749.26	12	GAS1-N57ET		1	GVAYQADTANETSGSTVNDPLANYESCSR	GVAYQADTAN[1037]ETSGSTVNDPLANYESC[PPa]SR	2	Y	2	3	12	GAS1-N57ET	0	FALSE	0	0.99	FALSE	1
1062	1749.26	12	GAS1-N57ET		1	GVAYQADTANETSGSTVNDPLANYESCSR	GVAYQADTAN[1062]ETSGSTVNDPLANYESC[PPa]SR	2	Y	2	3	12	GAS1-N57ET	0	FALSE	0	0.99	FALSE	1
1087	1749.26	12	GAS1-N57ET		1	GVAYQADTANETSGSTVNDPLANYESCSR	GVAYQADTAN[1087]ETSGSTVNDPLANYESC[PPa]SR	2	Y	2	3	12	GAS1-N57ET	0	FALSE	0	0.99	FALSE	1
1112	1749.26	12	GAS1-N57ET		1	GVAYQADTANETSGSTVNDPLANYESCSR	GVAYQADTAN[1112]ETSGSTVNDPLANYESC[PPa]SR	2	Y	2	3	12	GAS1-N57ET	0	FALSE	0	0.99	FALSE	1
1137	1749.26	12	GAS1-N57ET		1	GVAYQADTANETSGSTVNDPLANYESCSR	GVAYQADTAN[1137]ETSGSTVNDPLANYESC[PPa]SR	2	Y	2	3	12	GAS1-N57ET	0	FALSE	0	0.99	FALSE	1
1162	1749.26	12	GAS1-N57ET		1	GVAYQADTANETSGSTVNDPLANYESCSR	GVAYQADTAN[1162]ETSGSTVNDPLANYESC[PPa]SR	2	Y	2	3	12	GAS1-N57ET	0	FALSE	0	0.99	FALSE	1
1187	1749.26	12	GAS1-N57ET		1	GVAYQADTANETSGSTVNDPLANYESCSR	GVAYQADTAN[1187]ETSGSTVNDPLANYESC[PPa]SR	2	Y	2	3	12	GAS1-N57ET	0	FALSE	0	0.99	FALSE	1
1212	1749.26	12	GAS1-N57ET		1	GVAYQADTANETSGSTVNDPLANYESCSR	GVAYQADTAN[1212]ETSGSTVNDPLANYESC[PPa]SR	2	Y	2	3	12	GAS1-N57ET	0	FALSE	0	0.99	FALSE	1
1237	1749.26	12	GAS1-N57ET		1	GVAYQADTANETSGSTVNDPLANYESCSR	GVAYQADTAN[1237]ETSGSTVNDPLANYESC[PPa]SR	2	Y	2	3	12	GAS1-N57ET	0	FALSE	0	0.99	FALSE	1
412.5	1540.69	12	CRH1-N177YT		1	FHNYTLDWAMDK	FHN[412]YTLDWAMDK	2	Y	1	1	12	CRH1-N177YT	0	FALSE	0	0.99	FALSE	1
437	1540.69	12	CRH1-N177YT		1	FHNYTLDWAMDK	FHN[437]YTLDWAMDK	2	Y	1	1	12	CRH1-N177YT	0	FALSE	0	0.99	FALSE	1
462	1540.69	12	CRH1-N177YT		1	FHNYTLDWAMDK	FHN[462]YTLDWAMDK	2	Y	1	1	12	CRH1-N177YT	0	FALSE	0	0.99	FALSE	1
487	1540.69	12	CRH1-N177YT		1	FHNYTLDWAMDK	FHN[487]YTLDWAMDK	2	Y	1	1	12	CRH1-N177YT	0	FALSE	0	0.99	FALSE	1
512	1540.69	12	CRH1-N177YT		1	FHNYTLDWAMDK	FHN[512]YTLDWAMDK	2	Y	1	1	12	CRH1-N177YT	0	FALSE	0	0.99	FALSE	1
537	1540.69	12	CRH1-N177YT		1	FHNYTLDWAMDK	FHN[537]YTLDWAMDK	2	Y	1	1	12	CRH1-N177YT	0	FALSE	0	0.99	FALSE	1
562	1540.69	12	CRH1-N177YT		1	FHNYTLDWAMDK	FHN[562]YTLDWAMDK	2	Y	1	1	12	CRH1-N177YT	0	FALSE	0	0.99	FALSE	1
587	1540.69	12	CRH1-N177YT		1	FHNYTLDWAMDK	FHN[587]YTLDWAMDK	2	Y	1	1	12	CRH1-N177YT	0	FALSE	0	0.99	FALSE	1
612	1540.69	12	CRH1-N177YT		1	FHNYTLDWAMDK	FHN[612]YTLDWAMDK	2	Y	1	1	12	CRH1-N177YT	0	FALSE	0	0.99	FALSE	1
637	1540.69	12	CRH1-N177YT		1	FHNYTLDWAMDK	FHN[637]YTLDWAMDK	2	Y	1	1	12	CRH1-N177YT	0	FALSE	0	0.99	FALSE	1
662	1540.69	12	CRH1-N177YT		1	FHNYTLDWAMDK	FHN[662]YTLDWAMDK	2	Y	1	1	12	CRH1-N177YT	0	FALSE	0	0.99	FALSE	1
687	1540.69	12	CRH1-N177YT		1	FHNYTLDWAMDK	FHN[687]YTLDWAMDK	2	Y	1	1	12	CRH1-N177YT	0	FALSE	0	0.99	FALSE	1
712	1540.69	12	CRH1-N177YT		1	FHNYTLDWAMDK	FHN[712]YTLDWAMDK	2	Y	1	1	12	CRH1-N177YT	0	FALSE	0	0.99	FALSE	1
737	1540.69	12	CRH1-N177YT		1	FHNYTLDWAMDK	FHN[737]YTLDWAMDK	2	Y	1	1	12	CRH1-N177YT	0	FALSE	0	0.99	FALSE	1
762	1540.69	12	CRH1-N177YT		1	FHNYTLDWAMDK	FHN[762]YTLDWAMDK	2	Y	1	1	12	CRH1-N177YT	0	FALSE	0	0.99	FALSE	1
787	1540.69	12	CRH1-N177YT		1	FHNYTLDWAMDK	FHN[787]YTLDWAMDK	2	Y	1	1	12	CRH1-N177YT	0	FALSE	0	0.99	FALSE	1
812	1540.69	12	CRH1-N177YT		1	FHNYTLDWAMDK	FHN[812]YTLDWAMDK	2	Y	1	1	12	CRH1-N177YT	0	FALSE	0	0.99	FALSE	1
837	1540.69	12	CRH1-N177YT		1	FHNYTLDWAMDK	FHN[837]YTLDWAMDK	2	Y	1	1	12	CRH1-N177YT	0	FALSE	0	0.99	FALSE	1
862	1540.69	12	CRH1-N177YT		1	FHNYTLDWAMDK	FHN[862]YTLDWAMDK	2	Y	1	1	12	CRH1-N177YT	0	FALSE	0	0.99	FALSE	1
887	1540.69	12	CRH1-N177YT		1	FHNYTLDWAMDK	FHN[887]YTLDWAMDK	2	Y	1	1	12	CRH1-N177YT	0	FALSE	0	0.99	FALSE	1
912	1540.69	12	CRH1-N177YT		1	FHNYTLDWAMDK	FHN[912]YTLDWAMDK	2	Y	1	1	12	CRH1-N177YT	0	FALSE	0	0.99	FALSE	1
937	1540.69	12	CRH1-N177YT		1	FHNYTLDWAMDK	FHN[937]YTLDWAMDK	2	Y	1	1	12	CRH1-N177YT	0	FALSE	0	0.99	FALSE	1
962	1540.69	12	CRH1-N177YT		1	FHNYTLDWAMDK	FHN[962]YTLDWAMDK	2	Y	1	1	12	CRH1-N177YT	0	FALSE	0	0.99	FALSE	1
987	1540.69	12	CRH1-N177YT		1	FHNYTLDWAMDK	FHN[987]YTLDWAMDK	2	Y	1	1	12	CRH1-N177YT	0	FALSE	0	0.99	FALSE	1
1012	1540.69	12	CRH1-N177YT		1	FHNYTLDWAMDK	FHN[1012]YTLDWAMDK	2	Y	1	1	12	CRH1-N177YT	0	FALSE	0	0.99	FALSE	1
1037	1540.69	12	CRH1-N177YT		1	FHNYTLDWAMDK	FHN[1037]YTLDWAMDK	2	Y	1	1	12	CRH1-N177YT	0	FALSE	0	0.99	FALSE	1
1062	1540.69	12	CRH1-N177YT		1	FHNYTLDWAMDK	FHN[1062]YTLDWAMDK	2	Y	1	1	12	CRH1-N177YT	0	FALSE	0	0.99	FALSE	1
1087	1540.69	12	CRH1-N177YT		1	FHNYTLDWAMDK	FHN[1087]YTLDWAMDK	2	Y	1	1	12	CRH1-N177YT	0	FALSE	0	0.99	FALSE	1
1112	1540.69	12	CRH1-N177YT		1	FHNYTLDWAMDK	FHN[1112]YTLDWAMDK	2	Y	1	1	12	CRH1-N177YT	0	FALSE	0	0.99	FALSE	1
1137	1540.69	12	CRH1-N177YT		1	FHNYTLDWAMDK	FHN[1137]YTLDWAMDK	2	Y	1	1	12	CRH1-N177YT	0	FALSE	0	0.99	FALSE	1
1162	1540.69	12	CRH1-N177YT		1	FHNYTLDWAMDK	FHN[1162]YTLDWAMDK	2	Y	1	1	12	CRH1-N177YT	0	FALSE	0	0.99	FALSE	1
1187	1540.69	12	CRH1-N177YT		1	FHNYTLDWAMDK	FHN[1187]YTLDWAMDK	2	Y	1	1	12	CRH1-N177YT	0	FALSE	0	0.99	FALSE	1
1212	1540.69	12	CRH1-N177YT		1	FHNYTLDWAMDK	FHN[1212]YTLDWAMDK	2	Y	1	1	12	CRH1-N177YT	0	FALSE	0	0.99	FALSE	1
1237	1540.69	12	CRH1-N177YT		1	FHNYTLDWAMDK	FHN[1237]YTLDWAMDK	2	Y	1	1	12	CRH1-N177YT	0	FALSE	0	0.99	FALSE	1
412.5	770.848	12	CRH1-N177YT		1	FHNYTLDWAMDK	FHN[412]YTLDWAMDK	2	Y	2	1	12	CRH1-N177YT	0	FALSE	0	0.99	FALSE	1
437	770.848	12	CRH1-N177YT		1	FHNYTLDWAMDK	FHN[437]YTLDWAMDK	2	Y	2	1	12	CRH1-N177YT	0	FALSE	0	0.99	FALSE	1
462	770.848	12	CRH1-N177YT		1	FHNYTLDWAMDK	FHN[462]YTLDWAMDK	2	Y	2	1	12	CRH1-N177YT	0	FALSE	0	0.99	FALSE	1
487	770.848	12	CRH1-N177YT		1	FHNYTLDWAMDK	FHN[487]YTLDWAMDK	2	Y	2	1	12	CRH1-N177YT	0	FALSE	0	0.99	FALSE	1
512	770.848	12	CRH1-N177YT		1	FHNYTLDWAMDK	FHN[512]YTLDWAMDK	2	Y	2	1	12	CRH1-N177YT	0	FALSE	0	0.99	FALSE	1
537	770.848	12	CRH1-N177YT		1	FHNYTLDWAMDK	FHN[537]YTLDWAMDK	2	Y	2	1	12	CRH1-N177YT	0	FALSE	0	0.99	FALSE	1
562	770.848	12	CRH1-N177YT		1	FHNYTLDWAMDK	FHN[562]YTLDWAMDK	2	Y	2	1	12	CRH1-N177YT	0	FALSE	0	0.99	FALSE	1
587	770.848	12	CRH1-N177YT		1	FHNYTLDWAMDK	FHN[587]YTLDWAMDK	2	Y	2	1	12	CRH1-N177YT	0	FALSE	0	0.99	FALSE	1
612	770.848	12	CRH1-N177YT		1	FHNYTLDWAMDK	FHN[612]YTLDWAMDK	2	Y	2	1	12	CRH1-N177YT	0	FALSE	0	0.99	FALSE	1
637	770.848	12	CRH1-N177YT		1	FHNYTLDWAMDK	FHN[637]YTLDWAMDK	2	Y	2	1	12	CRH1-N177YT	0	FALSE	0	0.99	FALSE	1
662	770.848	12	CRH1-N177YT		1	FHNYTLDWAMDK	FHN[662]YTLDWAMDK	2	Y	2	1	12	CRH1-N177YT	0	FALSE	0	0.99	FALSE	1
687	770.848	12	CRH1-N177YT		1	FHNYTLDWAMDK	FHN[687]YTLDWAMDK	2	Y	2	1	12	CRH1-N177YT	0	FALSE	0	0.99	FALSE	1
712	770.848	12	CRH1-N177YT		1	FHNYTLDWAMDK	FHN[712]YTLDWAMDK	2	Y	2	1	12	CRH1-N177YT	0	FALSE	0	0.99	FALSE	1
737	770.848	12	CRH1-N177YT		1	FHNYTLDWAMDK	FHN[737]YTLDWAMDK	2	Y	2	1	12	CRH1-N177YT	0	FALSE	0	0.99	FALSE	1
762	770.848	12	CRH1-N177YT		1	FHNYTLDWAMDK	FHN[762]YTLDWAMDK	2	Y	2	1	12	CRH1-N177YT	0	FALSE	0	0.99	FALSE	1
787	770.848	12	CRH1-N177YT		1	FHNYTLDWAMDK	FHN[787]YTLDWAMDK	2	Y	2	1	12	CRH1-N177YT	0	FALSE	0	0.99	FALSE	1
812	770.848	12	CRH1-N177YT		1	FHNYTLDWAMDK	FHN[812]YTLDWAMDK	2	Y	2	1	12	CRH1-N177YT	0	FALSE	0	0.99	FALSE	1
837	770.848	12	CRH1-N177YT		1	FHNYTLDWAMDK	FHN[837]YTLDWAMDK	2	Y	2	1	12	CRH1-N177YT	0	FALSE	0	0.99	FALSE	1
862	770.848	12	CRH1-N177YT		1	FHNYTLDWAMDK	FHN[862]YTLDWAMDK	2	Y	2	1	12	CRH1-N177YT	0	FALSE	0	0.99	FALSE	1
887	770.848	12	CRH1-N177YT		1	FHNYTLDWAMDK	FHN[887]YTLDWAMDK	2	Y	2	1	12	CRH1-N177YT	0	FALSE	0	0.99	FALSE	1
912	770.848	12	CRH1-N177YT		1	FHNYTLDWAMDK	FHN[912]YTLDWAMDK	2	Y	2	1	12	CRH1-N177YT	0	FALSE	0	0.99	FALSE	1
937	770.848	12	CRH1-N177YT		1	FHNYTLDWAMDK	FHN[937]YTLDWAMDK	2	Y	2	1	12	CRH1-N177YT	0	FALSE	0	0.99	FALSE	1
962	770.848	12	CRH1-N177YT		1	FHNYTLDWAMDK	FHN[962]YTLDWAMDK	2	Y	2	1	12	CRH1-N177YT	0	FALSE	0	0.99	FALSE	1
987	770.848	12	CRH1-N177YT		1	FHNYTLDWAMDK	FHN[987]YTLDWAMDK	2	Y	2	1	12	CRH1-N177YT	0	FALSE	0	0.99	FALSE	1
1012	770.848	12	CRH1-N177YT		1	FHNYTLDWAMDK	FHN[1012]YTLDWAMDK	2	Y	2	1	12	CRH1-N177YT	0	FALSE	0	0.99	FALSE	1
1037	770.848	12	CRH1-N177YT		1	FHNYTLDWAMDK	FHN[1037]YTLDWAMDK	2	Y	2	1	12	CRH1-N177YT	0	FALSE	0	0.99	FALSE	1
1062	770.848	12	CRH1-N177YT		1	FHNYTLDWAMDK	FHN[1062]YTLDWAMDK	2	Y	2	1	12	CRH1-N177YT	0	FALSE	0	0.99	FALSE	1
1087	770.848	12	CRH1-N177YT		1	FHNYTLDWAMDK	FHN[1087]YTLDWAMDK	2	Y	2	1	12	CRH1-N177YT	0	FALSE	0	0.99	FALSE	1
1112	770.848	12	CRH1-N177YT		1	FHNYTLDWAMDK	FHN[1112]YTLDWAMDK	2	Y	2	1	12	CRH1-N177YT	0	FALSE	0	0.99	FALSE	1
1137	770.848	12	CRH1-N177YT		1	FHNYTLDWAMDK	FHN[1137]YTLDWAMDK	2	Y	2	1	12	CRH1-N177YT	0	FALSE	0	0.99	FALSE	1
1162	770.848	12	CRH1-N177YT		1	FHNYTLDWAMDK	FHN[1162]YTLDWAMDK	2	Y	2	1	12	CRH1-N177YT	0	FALSE	0	0.99	FALSE	1
1187	770.848	12	CRH1-N177YT		1	FHNYTLDWAMDK	FHN[1187]YTLDWAMDK	2	Y	2	1	12	CRH1-N177YT	0	FALSE	0	0.99	FALSE	1
1212	770.848	12	CRH1-N177YT		1	FHNYTLDWAMDK	FHN[1212]YTLDWAMDK	2	Y	2	1	12	CRH1-N177YT	0	FALSE	0	0.99	FALSE	1
1237	770.848	12	CRH1-N177YT		1	FHNYTLDWAMDK	FHN[1237]YTLDWAMDK	2	Y	2	1	12	CRH1-N177YT	0	FALSE	0	0.99	FALSE	1
412.5	1743.77	12	CRH1-N177YT		1	FHNYTLDWAMDK	FHN[412]YTLDWAMDK	2	Y	1	2	12	CRH1-N177YT	0	FALSE	0	0.99	FALSE	1
437	1743.77	12	CRH1-N177YT		1	FHNYTLDWAMDK	FHN[437]YTLDWAMDK	2	Y	1	2	12	CRH1-N177YT	0	FALSE	0	0.99	FALSE	1
462	1743.77	12	CRH1-N177YT		1	FHNYTLDWAMDK	FHN[462]YTLDWAMDK	2	Y	1	2	12	CRH1-N177YT	0	FALSE	0	0.99	FALSE	1
487	1743.77	12	CRH1-N177YT		1	FHNYTLDWAMDK	FHN[487]YTLDWAMDK	2	Y	1	2	12	CRH1-N177YT	0	FALSE	0	0.99	FALSE	1
512	1743.77	12	CRH1-N177YT		1	FHNYTLDWAMDK	FHN[512]YTLDWAMDK	2	Y	1	2	12	CRH1-N177YT	0	FALSE	0	0.99	FALSE	1
537	1743.77	12	CRH1-N177YT		1	FHNYTLDWAMDK	FHN[537]YTLDWAMDK	2	Y	1	2	12	CRH1-N177YT	0	FALSE	0	0.99	FALSE	1
562	1743.77	12	CRH1-N177YT		1	FHNYTLDWAMDK	FHN[562]YTLDWAMDK	2	Y	1	2	12	CRH1-N177YT	0	FALSE	0	0.99	FALSE	1
587	1743.77	12	CRH1-N177YT		1	FHNYTLDWAMDK	FHN[587]YTLDWAMDK	2	Y	1	2	12	CRH1-N177YT	0	FALSE	0	0.99	FALSE	1
612	1743.77	12	CRH1-N177YT		1	FHNYTLDWAMDK	FHN[612]YTLDWAMDK	2	Y	1	2	12	CRH1-N177YT	0	FALSE	0	0.99	FALSE	1
637	1743.77	12	CRH1-N177YT		1	FHNYTLDWAMDK	FHN[637]YTLDWAMDK	2	Y	1	2	12	CRH1-N177YT	0	FALSE	0	0.99	FALSE	1
662	1743.77	12	CRH1-N177YT		1	FHNYTLDWAMDK	FHN[662]YTLDWAMDK	2	Y	1	2	12	CRH1-N177YT	0	FALSE	0	0.99	FALSE	1
687	1743.77	12	CRH1-N177YT		1	FHNYTLDWAMDK	FHN[687]YTLDWAMDK	2	Y	1	2	12	CRH1-N177YT	0	FALSE	0	0.99	FALSE	1
712	1743.77	12	CRH1-N177YT		1	FHNYTLDWAMDK	FHN[712]YTLDWAMDK	2	Y	1	2	12	CRH1-N177YT	0	FALSE	0	0.99	FALSE	1
737	1743.77	12	CRH1-N177YT		1	FHNYTLDWAMDK	FHN[737]YTLDWAMDK	2	Y	1	2	12	CRH1-N177YT	0	FALSE	0	0.99	FALSE	1
762	1743.77	12	CRH1-N177YT		1	FHNYTLDWAMDK	FHN[762]YTLDWAMDK	2	Y	1	2	12	CRH1-N177YT	0	FALSE	0	0.99	FALSE	1
787	1743.77	12	CRH1-N177YT		1	FHNYTLDWAMDK	FHN[787]YTLDWAMDK	2	Y	1	2	12	CRH1-N177YT	0	FALSE	0	0.99	FALSE	1
812	1743.77	12	CRH1-N177YT		1	FHNYTLDWAMDK	FHN[812]YTLDWAMDK	2	Y	1	2	12	CRH1-N177YT	0	FALSE	0	0.99	FALSE	1
837	1743.77	12	CRH1-N177YT		1	FHNYTLDWAMDK	FHN[837]YTLDWAMDK	2	Y	1	2	12	CRH1-N177YT	0	FALSE	0	0.99	FALSE	1
862	1743.77	12	CRH1-N177YT		1	FHNYTLDWAMDK	FHN[862]YTLDWAMDK	2	Y	1	2	12	CRH1-N177YT	0	FALSE	0	0.99	FALSE	1
887	1743.77	12	CRH1-N177YT		1	FHNYTLDWAMDK	FHN[887]YTLDWAMDK	2	Y	1	2	12	CRH1-N177YT	0	FALSE	0	0.99	FALSE	1
912	1743.77	12	CRH1-N177YT		1	FHNYTLDWAMDK	FHN[912]YTLDWAMDK	2	Y	1	2	12	CRH1-N177YT	0	FALSE	0	0.99	FALSE	1
937	1743.77	12	CRH1-N177YT		1	FHNYTLDWAMDK	FHN[937]YTLDWAMDK	2	Y	1	2	12	CRH1-N177YT	0	FALSE	0	0.99	FALSE	1
962	1743.77	12	CRH1-N177YT		1	FHNYTLDWAMDK	FHN[962]YTLDWAMDK	2	Y	1	2	12	CRH1-N177YT	0	FALSE	0	0.99	FALSE	1
987	1743.77	12	CRH1-N177YT		1	FHNYTLDWAMDK	FHN[987]YTLDWAMDK	2	Y	1	2	12	CRH1-N177YT	0	FALSE	0	0.99	FALSE	1
1012	1743.77	12	CRH1-N177YT		1	FHNYTLDWAMDK	FHN[1012]YTLDWAMDK	2	Y	1	2	12	CRH1-N177YT	0	FALSE	0	0.99	FALSE	1
1037	1743.77	12	CRH1-N177YT		1	FHNYTLDWAMDK	FHN[1037]YTLDWAMDK	2	Y	1	2	12	CRH1-N177YT	0	FALSE	0	0.99	FALSE	1
1062	1743.77	12	CRH1-N177YT		1	FHNYTLDWAMDK	FHN[1062]YTLDWAMDK	2	Y	1	2	12	CRH1-N177YT	0	FALSE	0	0.99	FALSE	1
1087	1743.77	12	CRH1-N177YT		1	FHNYTLDWAMDK	FHN[1087]YTLDWAMDK	2	Y	1	2	12	CRH1-N177YT	0	FALSE	0	0.99	FALSE	1
1112	1743.77	12	CRH1-N177YT		1	FHNYTLDWAMDK	FHN[1112]YTLDWAMDK	2	Y	1	2	12	CRH1-N177YT	0	FALSE	0	0.99	FALSE	1
1137	1743.77	12	CRH1-N177YT		1	FHNYTLDWAMDK	FHN[1137]YTLDWAMDK	2	Y	1	2	12	CRH1-N177YT	0	FALSE	0	0.99	FALSE	1
1162	1743.77	12	CRH1-N177YT		1	FHNYTLDWAMDK	FHN[1162]YTLDWAMDK	2	Y	1	2	12	CRH1-N177YT	0	FALSE	0	0.99	FALSE	1
1187	1743.77	12	CRH1-N177YT		1	FHNYTLDWAMDK	FHN[1187]YTLDWAMDK	2	Y	1	2	12	CRH1-N177YT	0	FALSE	0	0.99	FALSE	1
1212	1743.77	12	CRH1-N177YT		1	FHNYTLDWAMDK	FHN[1212]YTLDWAMDK	2	Y	1	2	12	CRH1-N177YT	0	FALSE	0	0.99	FALSE	1
1237	1743.77	12	CRH1-N177YT		1	FHNYTLDWAMDK	FHN[1237]YTLDWAMDK	2	Y	1	2	12	CRH1-N177YT	0	FALSE	0	0.99	FALSE	1
412.5	872.388	12	CRH1-N177YT		1	FHNYTLDWAMDK	FHN[412]YTLDWAMDK	2	Y	2	2	12	CRH1-N177YT	0	FALSE	0	0.99	FALSE	1
437	872.388	12	CRH1-N177YT		1	FHNYTLDWAMDK	FHN[437]YTLDWAMDK	2	Y	2	2	12	CRH1-N177YT	0	FALSE	0	0.99	FALSE	1
462	872.388	12	CRH1-N177YT		1	FHNYTLDWAMDK	FHN[462]YTLDWAMDK	2	Y	2	2	12	CRH1-N177YT	0	FALSE	0	0.99	FALSE	1
487	872.388	12	CRH1-N177YT		1	FHNYTLDWAMDK	FHN[487]YTLDWAMDK	2	Y	2	2	12	CRH1-N177YT	0	FALSE	0	0.99	FALSE	1
512	872.388	12	CRH1-N177YT		1	FHNYTLDWAMDK	FHN[512]YTLDWAMDK	2	Y	2	2	12	CRH1-N177YT	0	FALSE	0	0.99	FALSE	1
537	872.388	12	CRH1-N177YT		1	FHNYTLDWAMDK	FHN[537]YTLDWAMDK	2	Y	2	2	12	CRH1-N177YT	0	FALSE	0	0.99	FALSE	1
562	872.388	12	CRH1-N177YT		1	FHNYTLDWAMDK	FHN[562]YTLDWAMDK	2	Y	2	2	12	CRH1-N177YT	0	FALSE	0	0.99	FALSE	1
587	872.388	12	CRH1-N177YT		1	FHNYTLDWAMDK	FHN[587]YTLDWAMDK	2	Y	2	2	12	CRH1-N177YT	0	FALSE	0	0.99	FALSE	1
612	872.388	12	CRH1-N177YT		1	FHNYTLDWAMDK	FHN[612]YTLDWAMDK	2	Y	2	2	12	CRH1-N177YT	0	FALSE	0	0.99	FALSE	1
637	872.388	12	CRH1-N177YT		1	FHNYTLDWAMDK	FHN[637]YTLDWAMDK	2	Y	2	2	12	CRH1-N177YT	0	FALSE	0	0.99	FALSE	1
662	872.388	12	CRH1-N177YT		1	FHNYTLDWAMDK	FHN[662]YTLDWAMDK	2	Y	2	2	12	CRH1-N177YT	0	FALSE	0	0.99	FALSE	1
687	872.388	12	CRH1-N177YT		1	FHNYTLDWAMDK	FHN[687]YTLDWAMDK	2	Y	2	2	12	CRH1-N177YT	0	FALSE	0	0.99	FALSE	1
712	872.388	12	CRH1-N177YT		1	FHNYTLDWAMDK	FHN[712]YTLDWAMDK	2	Y	2	2	12	CRH1-N177YT	0	FALSE	0	0.99	FALSE	1
737	872.388	12	CRH1-N177YT		1	FHNYTLDWAMDK	FHN[737]YTLDWAMDK	2	Y	2	2	12	CRH1-N177YT	0	FALSE	0	0.99	FALSE	1
762	872.388	12	CRH1-N177YT		1	FHNYTLDWAMDK	FHN[762]YTLDWAMDK	2	Y	2	2	12	CRH1-N177YT	0	FALSE	0	0.99	FALSE	1
787	872.388	12	CRH1-N177YT		1	FHNYTLDWAMDK	FHN[787]YTLDWAMDK	2	Y	2	2	12	CRH1-N177YT	0	FALSE	0	0.99	FALSE	1
812	872.388	12	CRH1-N177YT		1	FHNYTLDWAMDK	FHN[812]YTLDWAMDK	2	Y	2	2	12	CRH1-N177YT	0	FALSE	0	0.99	FALSE	1
837	872.388	12	CRH1-N177YT		1	FHNYTLDWAMDK	FHN[837]YTLDWAMDK	2	Y	2	2	12	CRH1-N177YT	0	FALSE	0	0.99	FALSE	1
862	872.388	12	CRH1-N177YT		1	FHNYTLDWAMDK	FHN[862]YTLDWAMDK	2	Y	2	2	12	CRH1-N177YT	0	FALSE	0	0.99	FALSE	1
887	872.388	12	CRH1-N177YT		1	FHNYTLDWAMDK	FHN[887]YTLDWAMDK	2	Y	2	2	12	CRH1-N177YT	0	FALSE	0	0.99	FALSE	1
912	872.388	12	CRH1-N177YT		1	FHNYTLDWAMDK	FHN[912]YTLDWAMDK	2	Y	2	2	12	CRH1-N177YT	0	FALSE	0	0.99	FALSE	1
937	872.388	12	CRH1-N177YT		1	FHNYTLDWAMDK	FHN[937]YTLDWAMDK	2	Y	2	2	12	CRH1-N177YT	0	FALSE	0	0.99	FALSE	1
962	872.388	12	CRH1-N177YT		1	FHNYTLDWAMDK	FHN[962]YTLDWAMDK	2	Y	2	2	12	CRH1-N177YT	0	FALSE	0	0.99	FALSE	1
987	872.388	12	CRH1-N177YT		1	FHNYTLDWAMDK	FHN[987]YTLDWAMDK	2	Y	2	2	12	CRH1-N177YT	0	FALSE	0	0.99	FALSE	1
1012	872.388	12	CRH1-N177YT		1	FHNYTLDWAMDK	FHN[1012]YTLDWAMDK	2	Y	2	2	12	CRH1-N177YT	0	FALSE	0	0.99	FALSE	1
1037	872.388	12	CRH1-N177YT		1	FHNYTLDWAMDK	FHN[1037]YTLDWAMDK	2	Y	2	2	12	CRH1-N177YT	0	FALSE	0	0.99	FALSE	1
1062	872.388	12	CRH1-N177YT		1	FHNYTLDWAMDK	FHN[1062]YTLDWAMDK	2	Y	2	2	12	CRH1-N177YT	0	FALSE	0	0.99	FALSE	1
1087	872.388	12	CRH1-N177YT		1	FHNYTLDWAMDK	FHN[1087]YTLDWAMDK	2	Y	2	2	12	CRH1-N177YT	0	FALSE	0	0.99	FALSE	1
1112	872.388	12	CRH1-N177YT		1	FHNYTLDWAMDK	FHN[1112]YTLDWAMDK	2	Y	2	2	12	CRH1-N177YT	0	FALSE	0	0.99	FALSE	1
1137	872.388	12	CRH1-N177YT		1	FHNYTLDWAMDK	FHN[1137]YTLDWAMDK	2	Y	2	2	12	CRH1-N177YT	0	FALSE	0	0.99	FALSE	1
1162	872.388	12	CRH1-N177YT		1	FHNYTLDWAMDK	FHN[1162]YTLDWAMDK	2	Y	2	2	12	CRH1-N177YT	0	FALSE	0	0.99	FALSE	1
1187	872.388	12	CRH1-N177YT		1	FHNYTLDWAMDK	FHN[1187]YTLDWAMDK	2	Y	2	2	12	CRH1-N177YT	0	FALSE	0	0.99	FALSE	1
1212	872.388	12	CRH1-N177YT		1	FHNYTLDWAMDK	FHN[1212]YTLDWAMDK	2	Y	2	2	12	CRH1-N177YT	0	FALSE	0	0.99	FALSE	1
1237	872.388	12	CRH1-N177YT		1	FHNYTLDWAMDK	FHN[1237]YTLDWAMDK	2	Y	2	2	12	CRH1-N177YT	0	FALSE	0	0.99	FALSE	1
412.5	973.927	12	CRH1-N177YT		1	FHNYTLDWAMDK	FHN[412]YTLDWAMDK	2	Y	2	3	12	CRH1-N177YT	0	FALSE	0	0.99	FALSE	1
437	973.927	12	CRH1-N177YT		1	FHNYTLDWAMDK	FHN[437]YTLDWAMDK	2	Y	2	3	12	CRH1-N177YT	0	FALSE	0	0.99	FALSE	1
462	973.927	12	CRH1-N177YT		1	FHNYTLDWAMDK	FHN[462]YTLDWAMDK	2	Y	2	3	12	CRH1-N177YT	0	FALSE	0	0.99	FALSE	1
487	973.927	12	CRH1-N177YT		1	FHNYTLDWAMDK	FHN[487]YTLDWAMDK	2	Y	2	3	12	CRH1-N177YT	0	FALSE	0	0.99	FALSE	1
512	973.927	12	CRH1-N177YT		1	FHNYTLDWAMDK	FHN[512]YTLDWAMDK	2	Y	2	3	12	CRH1-N177YT	0	FALSE	0	0.99	FALSE	1
537	973.927	12	CRH1-N177YT		1	FHNYTLDWAMDK	FHN[537]YTLDWAMDK	2	Y	2	3	12	CRH1-N177YT	0	FALSE	0	0.99	FALSE	1
562	973.927	12	CRH1-N177YT		1	FHNYTLDWAMDK	FHN[562]YTLDWAMDK	2	Y	2	3	12	CRH1-N177YT	0	FALSE	0	0.99	FALSE	1
587	973.927	12	CRH1-N177YT		1	FHNYTLDWAMDK	FHN[587]YTLDWAMDK	2	Y	2	3	12	CRH1-N177YT	0	FALSE	0	0.99	FALSE	1
612	973.927	12	CRH1-N177YT		1	FHNYTLDWAMDK	FHN[612]YTLDWAMDK	2	Y	2	3	12	CRH1-N177YT	0	FALSE	0	0.99	FALSE	1
637	973.927	12	CRH1-N177YT		1	FHNYTLDWAMDK	FHN[637]YTLDWAMDK	2	Y	2	3	12	CRH1-N177YT	0	FALSE	0	0.99	FALSE	1
662	973.927	12	CRH1-N177YT		1	FHNYTLDWAMDK	FHN[662]YTLDWAMDK	2	Y	2	3	12	CRH1-N177YT	0	FALSE	0	0.99	FALSE	1
687	973.927	12	CRH1-N177YT		1	FHNYTLDWAMDK	FHN[687]YTLDWAMDK	2	Y	2	3	12	CRH1-N177YT	0	FALSE	0	0.99	FALSE	1
712	973.927	12	CRH1-N177YT		1	FHNYTLDWAMDK	FHN[712]YTLDWAMDK	2	Y	2	3	12	CRH1-N177YT	0	FALSE	0	0.99	FALSE	1
737	973.927	12	CRH1-N177YT		1	FHNYTLDWAMDK	FHN[737]YTLDWAMDK	2	Y	2	3	12	CRH1-N177YT	0	FALSE	0	0.99	FALSE	1
762	973.927	12	CRH1-N177YT		1	FHNYTLDWAMDK	FHN[762]YTLDWAMDK	2	Y	2	3	12	CRH1-N177YT	0	FALSE	0	0.99	FALSE	1
787	973.927	12	CRH1-N177YT		1	FHNYTLDWAMDK	FHN[787]YTLDWAMDK	2	Y	2	3	12	CRH1-N177YT	0	FALSE	0	0.99	FALSE	1
812	973.927	12	CRH1-N177YT		1	FHNYTLDWAMDK	FHN[812]YTLDWAMDK	2	Y	2	3	12	CRH1-N177YT	0	FALSE	0	0.99	FALSE	1
837	973.927	12	CRH1-N177YT		1	FHNYTLDWAMDK	FHN[837]YTLDWAMDK	2	Y	2	3	12	CRH1-N177YT	0	FALSE	0	0.99	FALSE	1
862	973.927	12	CRH1-N177YT		1	FHNYTLDWAMDK	FHN[862]YTLDWAMDK	2	Y	2	3	12	CRH1-N177YT	0	FALSE	0	0.99	FALSE	1
887	973.927	12	CRH1-N177YT		1	FHNYTLDWAMDK	FHN[887]YTLDWAMDK	2	Y	2	3	12	CRH1-N177YT	0	FALSE	0	0.99	FALSE	1
912	973.927	12	CRH1-N177YT		1	FHNYTLDWAMDK	FHN[912]YTLDWAMDK	2	Y	2	3	12	CRH1-N177YT	0	FALSE	0	0.99	FALSE	1
937	973.927	12	CRH1-N177YT		1	FHNYTLDWAMDK	FHN[937]YTLDWAMDK	2	Y	2	3	12	CRH1-N177YT	0	FALSE	0	0.99	FALSE	1
962	973.927	12	CRH1-N177YT		1	FHNYTLDWAMDK	FHN[962]YTLDWAMDK	2	Y	2	3	12	CRH1-N177YT	0	FALSE	0	0.99	FALSE	1
987	973.927	12	CRH1-N177YT		1	FHNYTLDWAMDK	FHN[987]YTLDWAMDK	2	Y	2	3	12	CRH1-N177YT	0	FALSE	0	0.99	FALSE	1
1012	973.927	12	CRH1-N177YT		1	FHNYTLDWAMDK	FHN[1012]YTLDWAMDK	2	Y	2	3	12	CRH1-N177YT	0	FALSE	0	0.99	FALSE	1
1037	973.927	12	CRH1-N177YT		1	FHNYTLDWAMDK	FHN[1037]YTLDWAMDK	2	Y	2	3	12	CRH1-N177YT	0	FALSE	0	0.99	FALSE	1
1062	973.927	12	CRH1-N177YT		1	FHNYTLDWAMDK	FHN[1062]YTLDWAMDK	2	Y	2	3	12	CRH1-N177YT	0	FALSE	0	0.99	FALSE	1
1087	973.927	12	CRH1-N177YT		1	FHNYTLDWAMDK	FHN[1087]YTLDWAMDK	2	Y	2	3	12	CRH1-N177YT	0	FALSE	0	0.99	FALSE	1
1112	973.927	12	CRH1-N177YT		1	FHNYTLDWAMDK	FHN[1112]YTLDWAMDK	2	Y	2	3	12	CRH1-N177YT	0	FALSE	0	0.99	FALSE	1
1137	973.927	12	CRH1-N177YT		1	FHNYTLDWAMDK	FHN[1137]YTLDWAMDK	2	Y	2	3	12	CRH1-N177YT	0	FALSE	0	0.99	FALSE	1
1162	973.927	12	CRH1-N177YT		1	FHNYTLDWAMDK	FHN[1162]YTLDWAMDK	2	Y	2	3	12	CRH1-N177YT	0	FALSE	0	0.99	FALSE	1
1187	973.927	12	CRH1-N177YT		1	FHNYTLDWAMDK	FHN[1187]YTLDWAMDK	2	Y	2	3	12	CRH1-N177YT	0	FALSE	0	0.99	FALSE	1
1212	973.927	12	CRH1-N177YT		1	FHNYTLDWAMDK	FHN[1212]YTLDWAMDK	2	Y	2	3	12	CRH1-N177YT	0	FALSE	0	0.99	FALSE	1
1237	973.927	12	CRH1-N177YT		1	FHNYTLDWAMDK	FHN[1237]YTLDWAMDK	2	Y	2	3	12	CRH1-N177YT	0	FALSE	0	0.99	FALSE	1
412.5	1216.1	12	GAS3-N269ST		1	LNSTFEDAVIPLIFSEYGCNK	LN[412]STFEDAVIPLIFSEYGC[PPa]NK	2	Y	2	1	12	GAS3-N269ST	0	FALSE	0	0.99	FALSE	1
437	1216.1	12	GAS3-N269ST		1	LNSTFEDAVIPLIFSEYGCNK	LN[437]STFEDAVIPLIFSEYGC[PPa]NK	2	Y	2	1	12	GAS3-N269ST	0	FALSE	0	0.99	FALSE	1
462	1216.1	12	GAS3-N269ST		1	LNSTFEDAVIPLIFSEYGCNK	LN[462]STFEDAVIPLIFSEYGC[PPa]NK	2	Y	2	1	12	GAS3-N269ST	0	FALSE	0	0.99	FALSE	1
487	1216.1	12	GAS3-N269ST		1	LNSTFEDAVIPLIFSEYGCNK	LN[487]STFEDAVIPLIFSEYGC[PPa]NK	2	Y	2	1	12	GAS3-N269ST	0	FALSE	0	0.99	FALSE	1
512	1216.1	12	GAS3-N269ST		1	LNSTFEDAVIPLIFSEYGCNK	LN[512]STFEDAVIPLIFSEYGC[PPa]NK	2	Y	2	1	12	GAS3-N269ST	0	FALSE	0	0.99	FALSE	1
537	1216.1	12	GAS3-N269ST		1	LNSTFEDAVIPLIFSEYGCNK	LN[537]STFEDAVIPLIFSEYGC[PPa]NK	2	Y	2	1	12	GAS3-N269ST	0	FALSE	0	0.99	FALSE	1
562	1216.1	12	GAS3-N269ST		1	LNSTFEDAVIPLIFSEYGCNK	LN[562]STFEDAVIPLIFSEYGC[PPa]NK	2	Y	2	1	12	GAS3-N269ST	0	FALSE	0	0.99	FALSE	1
587	1216.1	12	GAS3-N269ST		1	LNSTFEDAVIPLIFSEYGCNK	LN[587]STFEDAVIPLIFSEYGC[PPa]NK	2	Y	2	1	12	GAS3-N269ST	0	FALSE	0	0.99	FALSE	1
612	1216.1	12	GAS3-N269ST		1	LNSTFEDAVIPLIFSEYGCNK	LN[612]STFEDAVIPLIFSEYGC[PPa]NK	2	Y	2	1	12	GAS3-N269ST	0	FALSE	0	0.99	FALSE	1
637	1216.1	12	GAS3-N269ST		1	LNSTFEDAVIPLIFSEYGCNK	LN[637]STFEDAVIPLIFSEYGC[PPa]NK	2	Y	2	1	12	GAS3-N269ST	0	FALSE	0	0.99	FALSE	1
662	1216.1	12	GAS3-N269ST		1	LNSTFEDAVIPLIFSEYGCNK	LN[662]STFEDAVIPLIFSEYGC[PPa]NK	2	Y	2	1	12	GAS3-N269ST	0	FALSE	0	0.99	FALSE	1
687	1216.1	12	GAS3-N269ST		1	LNSTFEDAVIPLIFSEYGCNK	LN[687]STFEDAVIPLIFSEYGC[PPa]NK	2	Y	2	1	12	GAS3-N269ST	0	FALSE	0	0.99	FALSE	1
712	1216.1	12	GAS3-N269ST		1	LNSTFEDAVIPLIFSEYGCNK	LN[712]STFEDAVIPLIFSEYGC[PPa]NK	2	Y	2	1	12	GAS3-N269ST	0	FALSE	0	0.99	FALSE	1
737	1216.1	12	GAS3-N269ST		1	LNSTFEDAVIPLIFSEYGCNK	LN[737]STFEDAVIPLIFSEYGC[PPa]NK	2	Y	2	1	12	GAS3-N269ST	0	FALSE	0	0.99	FALSE	1
762	1216.1	12	GAS3-N269ST		1	LNSTFEDAVIPLIFSEYGCNK	LN[762]STFEDAVIPLIFSEYGC[PPa]NK	2	Y	2	1	12	GAS3-N269ST	0	FALSE	0	0.99	FALSE	1
787	1216.1	12	GAS3-N269ST		1	LNSTFEDAVIPLIFSEYGCNK	LN[787]STFEDAVIPLIFSEYGC[PPa]NK	2	Y	2	1	12	GAS3-N269ST	0	FALSE	0	0.99	FALSE	1
812	1216.1	12	GAS3-N269ST		1	LNSTFEDAVIPLIFSEYGCNK	LN[812]STFEDAVIPLIFSEYGC[PPa]NK	2	Y	2	1	12	GAS3-N269ST	0	FALSE	0	0.99	FALSE	1
837	1216.1	12	GAS3-N269ST		1	LNSTFEDAVIPLIFSEYGCNK	LN[837]STFEDAVIPLIFSEYGC[PPa]NK	2	Y	2	1	12	GAS3-N269ST	0	FALSE	0	0.99	FALSE	1
862	1216.1	12	GAS3-N269ST		1	LNSTFEDAVIPLIFSEYGCNK	LN[862]STFEDAVIPLIFSEYGC[PPa]NK	2	Y	2	1	12	GAS3-N269ST	0	FALSE	0	0.99	FALSE	1
887	1216.1	12	GAS3-N269ST		1	LNSTFEDAVIPLIFSEYGCNK	LN[887]STFEDAVIPLIFSEYGC[PPa]NK	2	Y	2	1	12	GAS3-N269ST	0	FALSE	0	0.99	FALSE	1
912	1216.1	12	GAS3-N269ST		1	LNSTFEDAVIPLIFSEYGCNK	LN[912]STFEDAVIPLIFSEYGC[PPa]NK	2	Y	2	1	12	GAS3-N269ST	0	FALSE	0	0.99	FALSE	1
937	1216.1	12	GAS3-N269ST		1	LNSTFEDAVIPLIFSEYGCNK	LN[937]STFEDAVIPLIFSEYGC[PPa]NK	2	Y	2	1	12	GAS3-N269ST	0	FALSE	0	0.99	FALSE	1
962	1216.1	12	GAS3-N269ST		1	LNSTFEDAVIPLIFSEYGCNK	LN[962]STFEDAVIPLIFSEYGC[PPa]NK	2	Y	2	1	12	GAS3-N269ST	0	FALSE	0	0.99	FALSE	1
987	1216.1	12	GAS3-N269ST		1	LNSTFEDAVIPLIFSEYGCNK	LN[987]STFEDAVIPLIFSEYGC[PPa]NK	2	Y	2	1	12	GAS3-N269ST	0	FALSE	0	0.99	FALSE	1
1012	1216.1	12	GAS3-N269ST		1	LNSTFEDAVIPLIFSEYGCNK	LN[1012]STFEDAVIPLIFSEYGC[PPa]NK	2	Y	2	1	12	GAS3-N269ST	0	FALSE	0	0.99	FALSE	1
1037	1216.1	12	GAS3-N269ST		1	LNSTFEDAVIPLIFSEYGCNK	LN[1037]STFEDAVIPLIFSEYGC[PPa]NK	2	Y	2	1	12	GAS3-N269ST	0	FALSE	0	0.99	FALSE	1
1062	1216.1	12	GAS3-N269ST		1	LNSTFEDAVIPLIFSEYGCNK	LN[1062]STFEDAVIPLIFSEYGC[PPa]NK	2	Y	2	1	12	GAS3-N269ST	0	FALSE	0	0.99	FALSE	1
1087	1216.1	12	GAS3-N269ST		1	LNSTFEDAVIPLIFSEYGCNK	LN[1087]STFEDAVIPLIFSEYGC[PPa]NK	2	Y	2	1	12	GAS3-N269ST	0	FALSE	0	0.99	FALSE	1
1112	1216.1	12	GAS3-N269ST		1	LNSTFEDAVIPLIFSEYGCNK	LN[1112]STFEDAVIPLIFSEYGC[PPa]NK	2	Y	2	1	12	GAS3-N269ST	0	FALSE	0	0.99	FALSE	1
1137	1216.1	12	GAS3-N269ST		1	LNSTFEDAVIPLIFSEYGCNK	LN[1137]STFEDAVIPLIFSEYGC[PPa]NK	2	Y	2	1	12	GAS3-N269ST	0	FALSE	0	0.99	FALSE	1
1162	1216.1	12	GAS3-N269ST		1	LNSTFEDAVIPLIFSEYGCNK	LN[1162]STFEDAVIPLIFSEYGC[PPa]NK	2	Y	2	1	12	GAS3-N269ST	0	FALSE	0	0.99	FALSE	1
1187	1216.1	12	GAS3-N269ST		1	LNSTFEDAVIPLIFSEYGCNK	LN[1187]STFEDAVIPLIFSEYGC[PPa]NK	2	Y	2	1	12	GAS3-N269ST	0	FALSE	0	0.99	FALSE	1
1212	1216.1	12	GAS3-N269ST		1	LNSTFEDAVIPLIFSEYGCNK	LN[1212]STFEDAVIPLIFSEYGC[PPa]NK	2	Y	2	1	12	GAS3-N269ST	0	FALSE	0	0.99	FALSE	1
1237	1216.1	12	GAS3-N269ST		1	LNSTFEDAVIPLIFSEYGCNK	LN[1237]STFEDAVIPLIFSEYGC[PPa]NK	2	Y	2	1	12	GAS3-N269ST	0	FALSE	0	0.99	FALSE	1
412.5	1317.64	12	GAS3-N269ST		1	LNSTFEDAVIPLIFSEYGCNK	LN[412]STFEDAVIPLIFSEYGC[PPa]NK	2	Y	2	2	12	GAS3-N269ST	0	FALSE	0	0.99	FALSE	1
437	1317.64	12	GAS3-N269ST		1	LNSTFEDAVIPLIFSEYGCNK	LN[437]STFEDAVIPLIFSEYGC[PPa]NK	2	Y	2	2	12	GAS3-N269ST	0	FALSE	0	0.99	FALSE	1
462	1317.64	12	GAS3-N269ST		1	LNSTFEDAVIPLIFSEYGCNK	LN[462]STFEDAVIPLIFSEYGC[PPa]NK	2	Y	2	2	12	GAS3-N269ST	0	FALSE	0	0.99	FALSE	1
487	1317.64	12	GAS3-N269ST		1	LNSTFEDAVIPLIFSEYGCNK	LN[487]STFEDAVIPLIFSEYGC[PPa]NK	2	Y	2	2	12	GAS3-N269ST	0	FALSE	0	0.99	FALSE	1
512	1317.64	12	GAS3-N269ST		1	LNSTFEDAVIPLIFSEYGCNK	LN[512]STFEDAVIPLIFSEYGC[PPa]NK	2	Y	2	2	12	GAS3-N269ST	0	FALSE	0	0.99	FALSE	1
537	1317.64	12	GAS3-N269ST		1	LNSTFEDAVIPLIFSEYGCNK	LN[537]STFEDAVIPLIFSEYGC[PPa]NK	2	Y	2	2	12	GAS3-N269ST	0	FALSE	0	0.99	FALSE	1
562	1317.64	12	GAS3-N269ST		1	LNSTFEDAVIPLIFSEYGCNK	LN[562]STFEDAVIPLIFSEYGC[PPa]NK	2	Y	2	2	12	GAS3-N269ST	0	FALSE	0	0.99	FALSE	1
587	1317.64	12	GAS3-N269ST		1	LNSTFEDAVIPLIFSEYGCNK	LN[587]STFEDAVIPLIFSEYGC[PPa]NK	2	Y	2	2	12	GAS3-N269ST	0	FALSE	0	0.99	FALSE	1
612	1317.64	12	GAS3-N269ST		1	LNSTFEDAVIPLIFSEYGCNK	LN[612]STFEDAVIPLIFSEYGC[PPa]NK	2	Y	2	2	12	GAS3-N269ST	0	FALSE	0	0.99	FALSE	1
637	1317.64	12	GAS3-N269ST		1	LNSTFEDAVIPLIFSEYGCNK	LN[637]STFEDAVIPLIFSEYGC[PPa]NK	2	Y	2	2	12	GAS3-N269ST	0	FALSE	0	0.99	FALSE	1
662	1317.64	12	GAS3-N269ST		1	LNSTFEDAVIPLIFSEYGCNK	LN[662]STFEDAVIPLIFSEYGC[PPa]NK	2	Y	2	2	12	GAS3-N269ST	0	FALSE	0	0.99	FALSE	1
687	1317.64	12	GAS3-N269ST		1	LNSTFEDAVIPLIFSEYGCNK	LN[687]STFEDAVIPLIFSEYGC[PPa]NK	2	Y	2	2	12	GAS3-N269ST	0	FALSE	0	0.99	FALSE	1
712	1317.64	12	GAS3-N269ST		1	LNSTFEDAVIPLIFSEYGCNK	LN[712]STFEDAVIPLIFSEYGC[PPa]NK	2	Y	2	2	12	GAS3-N269ST	0	FALSE	0	0.99	FALSE	1
737	1317.64	12	GAS3-N269ST		1	LNSTFEDAVIPLIFSEYGCNK	LN[737]STFEDAVIPLIFSEYGC[PPa]NK	2	Y	2	2	12	GAS3-N269ST	0	FALSE	0	0.99	FALSE	1
762	1317.64	12	GAS3-N269ST		1	LNSTFEDAVIPLIFSEYGCNK	LN[762]STFEDAVIPLIFSEYGC[PPa]NK	2	Y	2	2	12	GAS3-N269ST	0	FALSE	0	0.99	FALSE	1
787	1317.64	12	GAS3-N269ST		1	LNSTFEDAVIPLIFSEYGCNK	LN[787]STFEDAVIPLIFSEYGC[PPa]NK	2	Y	2	2	12	GAS3-N269ST	0	FALSE	0	0.99	FALSE	1
812	1317.64	12	GAS3-N269ST		1	LNSTFEDAVIPLIFSEYGCNK	LN[812]STFEDAVIPLIFSEYGC[PPa]NK	2	Y	2	2	12	GAS3-N269ST	0	FALSE	0	0.99	FALSE	1
837	1317.64	12	GAS3-N269ST		1	LNSTFEDAVIPLIFSEYGCNK	LN[837]STFEDAVIPLIFSEYGC[PPa]NK	2	Y	2	2	12	GAS3-N269ST	0	FALSE	0	0.99	FALSE	1
862	1317.64	12	GAS3-N269ST		1	LNSTFEDAVIPLIFSEYGCNK	LN[862]STFEDAVIPLIFSEYGC[PPa]NK	2	Y	2	2	12	GAS3-N269ST	0	FALSE	0	0.99	FALSE	1
887	1317.64	12	GAS3-N269ST		1	LNSTFEDAVIPLIFSEYGCNK	LN[887]STFEDAVIPLIFSEYGC[PPa]NK	2	Y	2	2	12	GAS3-N269ST	0	FALSE	0	0.99	FALSE	1
912	1317.64	12	GAS3-N269ST		1	LNSTFEDAVIPLIFSEYGCNK	LN[912]STFEDAVIPLIFSEYGC[PPa]NK	2	Y	2	2	12	GAS3-N269ST	0	FALSE	0	0.99	FALSE	1
937	1317.64	12	GAS3-N269ST		1	LNSTFEDAVIPLIFSEYGCNK	LN[937]STFEDAVIPLIFSEYGC[PPa]NK	2	Y	2	2	12	GAS3-N269ST	0	FALSE	0	0.99	FALSE	1
962	1317.64	12	GAS3-N269ST		1	LNSTFEDAVIPLIFSEYGCNK	LN[962]STFEDAVIPLIFSEYGC[PPa]NK	2	Y	2	2	12	GAS3-N269ST	0	FALSE	0	0.99	FALSE	1
987	1317.64	12	GAS3-N269ST		1	LNSTFEDAVIPLIFSEYGCNK	LN[987]STFEDAVIPLIFSEYGC[PPa]NK	2	Y	2	2	12	GAS3-N269ST	0	FALSE	0	0.99	FALSE	1
1012	1317.64	12	GAS3-N269ST		1	LNSTFEDAVIPLIFSEYGCNK	LN[1012]STFEDAVIPLIFSEYGC[PPa]NK	2	Y	2	2	12	GAS3-N269ST	0	FALSE	0	0.99	FALSE	1
1037	1317.64	12	GAS3-N269ST		1	LNSTFEDAVIPLIFSEYGCNK	LN[1037]STFEDAVIPLIFSEYGC[PPa]NK	2	Y	2	2	12	GAS3-N269ST	0	FALSE	0	0.99	FALSE	1
1062	1317.64	12	GAS3-N269ST		1	LNSTFEDAVIPLIFSEYGCNK	LN[1062]STFEDAVIPLIFSEYGC[PPa]NK	2	Y	2	2	12	GAS3-N269ST	0	FALSE	0	0.99	FALSE	1
1087	1317.64	12	GAS3-N269ST		1	LNSTFEDAVIPLIFSEYGCNK	LN[1087]STFEDAVIPLIFSEYGC[PPa]NK	2	Y	2	2	12	GAS3-N269ST	0	FALSE	0	0.99	FALSE	1
1112	1317.64	12	GAS3-N269ST		1	LNSTFEDAVIPLIFSEYGCNK	LN[1112]STFEDAVIPLIFSEYGC[PPa]NK	2	Y	2	2	12	GAS3-N269ST	0	FALSE	0	0.99	FALSE	1
1137	1317.64	12	GAS3-N269ST		1	LNSTFEDAVIPLIFSEYGCNK	LN[1137]STFEDAVIPLIFSEYGC[PPa]NK	2	Y	2	2	12	GAS3-N269ST	0	FALSE	0	0.99	FALSE	1
1162	1317.64	12	GAS3-N269ST		1	LNSTFEDAVIPLIFSEYGCNK	LN[1162]STFEDAVIPLIFSEYGC[PPa]NK	2	Y	2	2	12	GAS3-N269ST	0	FALSE	0	0.99	FALSE	1
1187	1317.64	12	GAS3-N269ST		1	LNSTFEDAVIPLIFSEYGCNK	LN[1187]STFEDAVIPLIFSEYGC[PPa]NK	2	Y	2	2	12	GAS3-N269ST	0	FALSE	0	0.99	FALSE	1
1212	1317.64	12	GAS3-N269ST		1	LNSTFEDAVIPLIFSEYGCNK	LN[1212]STFEDAVIPLIFSEYGC[PPa]NK	2	Y	2	2	12	GAS3-N269ST	0	FALSE	0	0.99	FALSE	1
1237	1317.64	12	GAS3-N269ST		1	LNSTFEDAVIPLIFSEYGCNK	LN[1237]STFEDAVIPLIFSEYGC[PPa]NK	2	Y	2	2	12	GAS3-N269ST	0	FALSE	0	0.99	FALSE	1
412.5	1419.18	12	GAS3-N269ST		1	LNSTFEDAVIPLIFSEYGCNK	LN[412]STFEDAVIPLIFSEYGC[PPa]NK	2	Y	2	3	12	GAS3-N269ST	0	FALSE	0	0.99	FALSE	1
437	1419.18	12	GAS3-N269ST		1	LNSTFEDAVIPLIFSEYGCNK	LN[437]STFEDAVIPLIFSEYGC[PPa]NK	2	Y	2	3	12	GAS3-N269ST	0	FALSE	0	0.99	FALSE	1
462	1419.18	12	GAS3-N269ST		1	LNSTFEDAVIPLIFSEYGCNK	LN[462]STFEDAVIPLIFSEYGC[PPa]NK	2	Y	2	3	12	GAS3-N269ST	0	FALSE	0	0.99	FALSE	1
487	1419.18	12	GAS3-N269ST		1	LNSTFEDAVIPLIFSEYGCNK	LN[487]STFEDAVIPLIFSEYGC[PPa]NK	2	Y	2	3	12	GAS3-N269ST	0	FALSE	0	0.99	FALSE	1
512	1419.18	12	GAS3-N269ST		1	LNSTFEDAVIPLIFSEYGCNK	LN[512]STFEDAVIPLIFSEYGC[PPa]NK	2	Y	2	3	12	GAS3-N269ST	0	FALSE	0	0.99	FALSE	1
537	1419.18	12	GAS3-N269ST		1	LNSTFEDAVIPLIFSEYGCNK	LN[537]STFEDAVIPLIFSEYGC[PPa]NK	2	Y	2	3	12	GAS3-N269ST	0	FALSE	0	0.99	FALSE	1
562	1419.18	12	GAS3-N269ST		1	LNSTFEDAVIPLIFSEYGCNK	LN[562]STFEDAVIPLIFSEYGC[PPa]NK	2	Y	2	3	12	GAS3-N269ST	0	FALSE	0	0.99	FALSE	1
587	1419.18	12	GAS3-N269ST		1	LNSTFEDAVIPLIFSEYGCNK	LN[587]STFEDAVIPLIFSEYGC[PPa]NK	2	Y	2	3	12	GAS3-N269ST	0	FALSE	0	0.99	FALSE	1
612	1419.18	12	GAS3-N269ST		1	LNSTFEDAVIPLIFSEYGCNK	LN[612]STFEDAVIPLIFSEYGC[PPa]NK	2	Y	2	3	12	GAS3-N269ST	0	FALSE	0	0.99	FALSE	1
637	1419.18	12	GAS3-N269ST		1	LNSTFEDAVIPLIFSEYGCNK	LN[637]STFEDAVIPLIFSEYGC[PPa]NK	2	Y	2	3	12	GAS3-N269ST	0	FALSE	0	0.99	FALSE	1
662	1419.18	12	GAS3-N269ST		1	LNSTFEDAVIPLIFSEYGCNK	LN[662]STFEDAVIPLIFSEYGC[PPa]NK	2	Y	2	3	12	GAS3-N269ST	0	FALSE	0	0.99	FALSE	1
687	1419.18	12	GAS3-N269ST		1	LNSTFEDAVIPLIFSEYGCNK	LN[687]STFEDAVIPLIFSEYGC[PPa]NK	2	Y	2	3	12	GAS3-N269ST	0	FALSE	0	0.99	FALSE	1
712	1419.18	12	GAS3-N269ST		1	LNSTFEDAVIPLIFSEYGCNK	LN[712]STFEDAVIPLIFSEYGC[PPa]NK	2	Y	2	3	12	GAS3-N269ST	0	FALSE	0	0.99	FALSE	1
737	1419.18	12	GAS3-N269ST		1	LNSTFEDAVIPLIFSEYGCNK	LN[737]STFEDAVIPLIFSEYGC[PPa]NK	2	Y	2	3	12	GAS3-N269ST	0	FALSE	0	0.99	FALSE	1
762	1419.18	12	GAS3-N269ST		1	LNSTFEDAVIPLIFSEYGCNK	LN[762]STFEDAVIPLIFSEYGC[PPa]NK	2	Y	2	3	12	GAS3-N269ST	0	FALSE	0	0.99	FALSE	1
787	1419.18	12	GAS3-N269ST		1	LNSTFEDAVIPLIFSEYGCNK	LN[787]STFEDAVIPLIFSEYGC[PPa]NK	2	Y	2	3	12	GAS3-N269ST	0	FALSE	0	0.99	FALSE	1
812	1419.18	12	GAS3-N269ST		1	LNSTFEDAVIPLIFSEYGCNK	LN[812]STFEDAVIPLIFSEYGC[PPa]NK	2	Y	2	3	12	GAS3-N269ST	0	FALSE	0	0.99	FALSE	1
837	1419.18	12	GAS3-N269ST		1	LNSTFEDAVIPLIFSEYGCNK	LN[837]STFEDAVIPLIFSEYGC[PPa]NK	2	Y	2	3	12	GAS3-N269ST	0	FALSE	0	0.99	FALSE	1
862	1419.18	12	GAS3-N269ST		1	LNSTFEDAVIPLIFSEYGCNK	LN[862]STFEDAVIPLIFSEYGC[PPa]NK	2	Y	2	3	12	GAS3-N269ST	0	FALSE	0	0.99	FALSE	1
887	1419.18	12	GAS3-N269ST		1	LNSTFEDAVIPLIFSEYGCNK	LN[887]STFEDAVIPLIFSEYGC[PPa]NK	2	Y	2	3	12	GAS3-N269ST	0	FALSE	0	0.99	FALSE	1
912	1419.18	12	GAS3-N269ST		1	LNSTFEDAVIPLIFSEYGCNK	LN[912]STFEDAVIPLIFSEYGC[PPa]NK	2	Y	2	3	12	GAS3-N269ST	0	FALSE	0	0.99	FALSE	1
937	1419.18	12	GAS3-N269ST		1	LNSTFEDAVIPLIFSEYGCNK	LN[937]STFEDAVIPLIFSEYGC[PPa]NK	2	Y	2	3	12	GAS3-N269ST	0	FALSE	0	0.99	FALSE	1
962	1419.18	12	GAS3-N269ST		1	LNSTFEDAVIPLIFSEYGCNK	LN[962]STFEDAVIPLIFSEYGC[PPa]NK	2	Y	2	3	12	GAS3-N269ST	0	FALSE	0	0.99	FALSE	1
987	1419.18	12	GAS3-N269ST		1	LNSTFEDAVIPLIFSEYGCNK	LN[987]STFEDAVIPLIFSEYGC[PPa]NK	2	Y	2	3	12	GAS3-N269ST	0	FALSE	0	0.99	FALSE	1
1012	1419.18	12	GAS3-N269ST		1	LNSTFEDAVIPLIFSEYGCNK	LN[1012]STFEDAVIPLIFSEYGC[PPa]NK	2	Y	2	3	12	GAS3-N269ST	0	FALSE	0	0.99	FALSE	1
1037	1419.18	12	GAS3-N269ST		1	LNSTFEDAVIPLIFSEYGCNK	LN[1037]STFEDAVIPLIFSEYGC[PPa]NK	2	Y	2	3	12	GAS3-N269ST	0	FALSE	0	0.99	FALSE	1
1062	1419.18	12	GAS3-N269ST		1	LNSTFEDAVIPLIFSEYGCNK	LN[1062]STFEDAVIPLIFSEYGC[PPa]NK	2	Y	2	3	12	GAS3-N269ST	0	FALSE	0	0.99	FALSE	1
1087	1419.18	12	GAS3-N269ST		1	LNSTFEDAVIPLIFSEYGCNK	LN[1087]STFEDAVIPLIFSEYGC[PPa]NK	2	Y	2	3	12	GAS3-N269ST	0	FALSE	0	0.99	FALSE	1
1112	1419.18	12	GAS3-N269ST		1	LNSTFEDAVIPLIFSEYGCNK	LN[1112]STFEDAVIPLIFSEYGC[PPa]NK	2	Y	2	3	12	GAS3-N269ST	0	FALSE	0	0.99	FALSE	1
1137	1419.18	12	GAS3-N269ST		1	LNSTFEDAVIPLIFSEYGCNK	LN[1137]STFEDAVIPLIFSEYGC[PPa]NK	2	Y	2	3	12	GAS3-N269ST	0	FALSE	0	0.99	FALSE	1
1162	1419.18	12	GAS3-N269ST		1	LNSTFEDAVIPLIFSEYGCNK	LN[1162]STFEDAVIPLIFSEYGC[PPa]NK	2	Y	2	3	12	GAS3-N269ST	0	FALSE	0	0.99	FALSE	1
1187	1419.18	12	GAS3-N269ST		1	LNSTFEDAVIPLIFSEYGCNK	LN[1187]STFEDAVIPLIFSEYGC[PPa]NK	2	Y	2	3	12	GAS3-N269ST	0	FALSE	0	0.99	FALSE	1
1212	1419.18	12	GAS3-N269ST		1	LNSTFEDAVIPLIFSEYGCNK	LN[1212]STFEDAVIPLIFSEYGC[PPa]NK	2	Y	2	3	12	GAS3-N269ST	0	FALSE	0	0.99	FALSE	1
1237	1419.18	12	GAS3-N269ST		1	LNSTFEDAVIPLIFSEYGCNK	LN[1237]STFEDAVIPLIFSEYGC[PPa]NK	2	Y	2	3	12	GAS3-N269ST	0	FALSE	0	0.99	FALSE	1
412.5	1168.62	12	ECM33-N304FS		1	VQTVGGAIEVTGNFSTLDLSSLK	VQTVGGAIEVTGN[412]FSTLDLSSLK	2	Y	2	1	12	ECM33-N304FS	0	FALSE	0	0.99	FALSE	1
437	1168.62	12	ECM33-N304FS		1	VQTVGGAIEVTGNFSTLDLSSLK	VQTVGGAIEVTGN[437]FSTLDLSSLK	2	Y	2	1	12	ECM33-N304FS	0	FALSE	0	0.99	FALSE	1
462	1168.62	12	ECM33-N304FS		1	VQTVGGAIEVTGNFSTLDLSSLK	VQTVGGAIEVTGN[462]FSTLDLSSLK	2	Y	2	1	12	ECM33-N304FS	0	FALSE	0	0.99	FALSE	1
487	1168.62	12	ECM33-N304FS		1	VQTVGGAIEVTGNFSTLDLSSLK	VQTVGGAIEVTGN[487]FSTLDLSSLK	2	Y	2	1	12	ECM33-N304FS	0	FALSE	0	0.99	FALSE	1
512	1168.62	12	ECM33-N304FS		1	VQTVGGAIEVTGNFSTLDLSSLK	VQTVGGAIEVTGN[512]FSTLDLSSLK	2	Y	2	1	12	ECM33-N304FS	0	FALSE	0	0.99	FALSE	1
537	1168.62	12	ECM33-N304FS		1	VQTVGGAIEVTGNFSTLDLSSLK	VQTVGGAIEVTGN[537]FSTLDLSSLK	2	Y	2	1	12	ECM33-N304FS	0	FALSE	0	0.99	FALSE	1
562	1168.62	12	ECM33-N304FS		1	VQTVGGAIEVTGNFSTLDLSSLK	VQTVGGAIEVTGN[562]FSTLDLSSLK	2	Y	2	1	12	ECM33-N304FS	0	FALSE	0	0.99	FALSE	1
587	1168.62	12	ECM33-N304FS		1	VQTVGGAIEVTGNFSTLDLSSLK	VQTVGGAIEVTGN[587]FSTLDLSSLK	2	Y	2	1	12	ECM33-N304FS	0	FALSE	0	0.99	FALSE	1
612	1168.62	12	ECM33-N304FS		1	VQTVGGAIEVTGNFSTLDLSSLK	VQTVGGAIEVTGN[612]FSTLDLSSLK	2	Y	2	1	12	ECM33-N304FS	0	FALSE	0	0.99	FALSE	1
637	1168.62	12	ECM33-N304FS		1	VQTVGGAIEVTGNFSTLDLSSLK	VQTVGGAIEVTGN[637]FSTLDLSSLK	2	Y	2	1	12	ECM33-N304FS	0	FALSE	0	0.99	FALSE	1
662	1168.62	12	ECM33-N304FS		1	VQTVGGAIEVTGNFSTLDLSSLK	VQTVGGAIEVTGN[662]FSTLDLSSLK	2	Y	2	1	12	ECM33-N304FS	0	FALSE	0	0.99	FALSE	1
687	1168.62	12	ECM33-N304FS		1	VQTVGGAIEVTGNFSTLDLSSLK	VQTVGGAIEVTGN[687]FSTLDLSSLK	2	Y	2	1	12	ECM33-N304FS	0	FALSE	0	0.99	FALSE	1
712	1168.62	12	ECM33-N304FS		1	VQTVGGAIEVTGNFSTLDLSSLK	VQTVGGAIEVTGN[712]FSTLDLSSLK	2	Y	2	1	12	ECM33-N304FS	0	FALSE	0	0.99	FALSE	1
737	1168.62	12	ECM33-N304FS		1	VQTVGGAIEVTGNFSTLDLSSLK	VQTVGGAIEVTGN[737]FSTLDLSSLK	2	Y	2	1	12	ECM33-N304FS	0	FALSE	0	0.99	FALSE	1
762	1168.62	12	ECM33-N304FS		1	VQTVGGAIEVTGNFSTLDLSSLK	VQTVGGAIEVTGN[762]FSTLDLSSLK	2	Y	2	1	12	ECM33-N304FS	0	FALSE	0	0.99	FALSE	1
787	1168.62	12	ECM33-N304FS		1	VQTVGGAIEVTGNFSTLDLSSLK	VQTVGGAIEVTGN[787]FSTLDLSSLK	2	Y	2	1	12	ECM33-N304FS	0	FALSE	0	0.99	FALSE	1
812	1168.62	12	ECM33-N304FS		1	VQTVGGAIEVTGNFSTLDLSSLK	VQTVGGAIEVTGN[812]FSTLDLSSLK	2	Y	2	1	12	ECM33-N304FS	0	FALSE	0	0.99	FALSE	1
837	1168.62	12	ECM33-N304FS		1	VQTVGGAIEVTGNFSTLDLSSLK	VQTVGGAIEVTGN[837]FSTLDLSSLK	2	Y	2	1	12	ECM33-N304FS	0	FALSE	0	0.99	FALSE	1
862	1168.62	12	ECM33-N304FS		1	VQTVGGAIEVTGNFSTLDLSSLK	VQTVGGAIEVTGN[862]FSTLDLSSLK	2	Y	2	1	12	ECM33-N304FS	0	FALSE	0	0.99	FALSE	1
887	1168.62	12	ECM33-N304FS		1	VQTVGGAIEVTGNFSTLDLSSLK	VQTVGGAIEVTGN[887]FSTLDLSSLK	2	Y	2	1	12	ECM33-N304FS	0	FALSE	0	0.99	FALSE	1
912	1168.62	12	ECM33-N304FS		1	VQTVGGAIEVTGNFSTLDLSSLK	VQTVGGAIEVTGN[912]FSTLDLSSLK	2	Y	2	1	12	ECM33-N304FS	0	FALSE	0	0.99	FALSE	1
937	1168.62	12	ECM33-N304FS		1	VQTVGGAIEVTGNFSTLDLSSLK	VQTVGGAIEVTGN[937]FSTLDLSSLK	2	Y	2	1	12	ECM33-N304FS	0	FALSE	0	0.99	FALSE	1
962	1168.62	12	ECM33-N304FS		1	VQTVGGAIEVTGNFSTLDLSSLK	VQTVGGAIEVTGN[962]FSTLDLSSLK	2	Y	2	1	12	ECM33-N304FS	0	FALSE	0	0.99	FALSE	1
987	1168.62	12	ECM33-N304FS		1	VQTVGGAIEVTGNFSTLDLSSLK	VQTVGGAIEVTGN[987]FSTLDLSSLK	2	Y	2	1	12	ECM33-N304FS	0	FALSE	0	0.99	FALSE	1
1012	1168.62	12	ECM33-N304FS		1	VQTVGGAIEVTGNFSTLDLSSLK	VQTVGGAIEVTGN[1012]FSTLDLSSLK	2	Y	2	1	12	ECM33-N304FS	0	FALSE	0	0.99	FALSE	1
1037	1168.62	12	ECM33-N304FS		1	VQTVGGAIEVTGNFSTLDLSSLK	VQTVGGAIEVTGN[1037]FSTLDLSSLK	2	Y	2	1	12	ECM33-N304FS	0	FALSE	0	0.99	FALSE	1
1062	1168.62	12	ECM33-N304FS		1	VQTVGGAIEVTGNFSTLDLSSLK	VQTVGGAIEVTGN[1062]FSTLDLSSLK	2	Y	2	1	12	ECM33-N304FS	0	FALSE	0	0.99	FALSE	1
1087	1168.62	12	ECM33-N304FS		1	VQTVGGAIEVTGNFSTLDLSSLK	VQTVGGAIEVTGN[1087]FSTLDLSSLK	2	Y	2	1	12	ECM33-N304FS	0	FALSE	0	0.99	FALSE	1
1112	1168.62	12	ECM33-N304FS		1	VQTVGGAIEVTGNFSTLDLSSLK	VQTVGGAIEVTGN[1112]FSTLDLSSLK	2	Y	2	1	12	ECM33-N304FS	0	FALSE	0	0.99	FALSE	1
1137	1168.62	12	ECM33-N304FS		1	VQTVGGAIEVTGNFSTLDLSSLK	VQTVGGAIEVTGN[1137]FSTLDLSSLK	2	Y	2	1	12	ECM33-N304FS	0	FALSE	0	0.99	FALSE	1
1162	1168.62	12	ECM33-N304FS		1	VQTVGGAIEVTGNFSTLDLSSLK	VQTVGGAIEVTGN[1162]FSTLDLSSLK	2	Y	2	1	12	ECM33-N304FS	0	FALSE	0	0.99	FALSE	1
1187	1168.62	12	ECM33-N304FS		1	VQTVGGAIEVTGNFSTLDLSSLK	VQTVGGAIEVTGN[1187]FSTLDLSSLK	2	Y	2	1	12	ECM33-N304FS	0	FALSE	0	0.99	FALSE	1
1212	1168.62	12	ECM33-N304FS		1	VQTVGGAIEVTGNFSTLDLSSLK	VQTVGGAIEVTGN[1212]FSTLDLSSLK	2	Y	2	1	12	ECM33-N304FS	0	FALSE	0	0.99	FALSE	1
1237	1168.62	12	ECM33-N304FS		1	VQTVGGAIEVTGNFSTLDLSSLK	VQTVGGAIEVTGN[1237]FSTLDLSSLK	2	Y	2	1	12	ECM33-N304FS	0	FALSE	0	0.99	FALSE	1
412.5	1270.16	12	ECM33-N304FS		1	VQTVGGAIEVTGNFSTLDLSSLK	VQTVGGAIEVTGN[412]FSTLDLSSLK	2	Y	2	2	12	ECM33-N304FS	0	FALSE	0	0.99	FALSE	1
437	1270.16	12	ECM33-N304FS		1	VQTVGGAIEVTGNFSTLDLSSLK	VQTVGGAIEVTGN[437]FSTLDLSSLK	2	Y	2	2	12	ECM33-N304FS	0	FALSE	0	0.99	FALSE	1
462	1270.16	12	ECM33-N304FS		1	VQTVGGAIEVTGNFSTLDLSSLK	VQTVGGAIEVTGN[462]FSTLDLSSLK	2	Y	2	2	12	ECM33-N304FS	0	FALSE	0	0.99	FALSE	1
487	1270.16	12	ECM33-N304FS		1	VQTVGGAIEVTGNFSTLDLSSLK	VQTVGGAIEVTGN[487]FSTLDLSSLK	2	Y	2	2	12	ECM33-N304FS	0	FALSE	0	0.99	FALSE	1
512	1270.16	12	ECM33-N304FS		1	VQTVGGAIEVTGNFSTLDLSSLK	VQTVGGAIEVTGN[512]FSTLDLSSLK	2	Y	2	2	12	ECM33-N304FS	0	FALSE	0	0.99	FALSE	1
537	1270.16	12	ECM33-N304FS		1	VQTVGGAIEVTGNFSTLDLSSLK	VQTVGGAIEVTGN[537]FSTLDLSSLK	2	Y	2	2	12	ECM33-N304FS	0	FALSE	0	0.99	FALSE	1
562	1270.16	12	ECM33-N304FS		1	VQTVGGAIEVTGNFSTLDLSSLK	VQTVGGAIEVTGN[562]FSTLDLSSLK	2	Y	2	2	12	ECM33-N304FS	0	FALSE	0	0.99	FALSE	1
587	1270.16	12	ECM33-N304FS		1	VQTVGGAIEVTGNFSTLDLSSLK	VQTVGGAIEVTGN[587]FSTLDLSSLK	2	Y	2	2	12	ECM33-N304FS	0	FALSE	0	0.99	FALSE	1
612	1270.16	12	ECM33-N304FS		1	VQTVGGAIEVTGNFSTLDLSSLK	VQTVGGAIEVTGN[612]FSTLDLSSLK	2	Y	2	2	12	ECM33-N304FS	0	FALSE	0	0.99	FALSE	1
637	1270.16	12	ECM33-N304FS		1	VQTVGGAIEVTGNFSTLDLSSLK	VQTVGGAIEVTGN[637]FSTLDLSSLK	2	Y	2	2	12	ECM33-N304FS	0	FALSE	0	0.99	FALSE	1
662	1270.16	12	ECM33-N304FS		1	VQTVGGAIEVTGNFSTLDLSSLK	VQTVGGAIEVTGN[662]FSTLDLSSLK	2	Y	2	2	12	ECM33-N304FS	0	FALSE	0	0.99	FALSE	1
687	1270.16	12	ECM33-N304FS		1	VQTVGGAIEVTGNFSTLDLSSLK	VQTVGGAIEVTGN[687]FSTLDLSSLK	2	Y	2	2	12	ECM33-N304FS	0	FALSE	0	0.99	FALSE	1
712	1270.16	12	ECM33-N304FS		1	VQTVGGAIEVTGNFSTLDLSSLK	VQTVGGAIEVTGN[712]FSTLDLSSLK	2	Y	2	2	12	ECM33-N304FS	0	FALSE	0	0.99	FALSE	1
737	1270.16	12	ECM33-N304FS		1	VQTVGGAIEVTGNFSTLDLSSLK	VQTVGGAIEVTGN[737]FSTLDLSSLK	2	Y	2	2	12	ECM33-N304FS	0	FALSE	0	0.99	FALSE	1
762	1270.16	12	ECM33-N304FS		1	VQTVGGAIEVTGNFSTLDLSSLK	VQTVGGAIEVTGN[762]FSTLDLSSLK	2	Y	2	2	12	ECM33-N304FS	0	FALSE	0	0.99	FALSE	1
787	1270.16	12	ECM33-N304FS		1	VQTVGGAIEVTGNFSTLDLSSLK	VQTVGGAIEVTGN[787]FSTLDLSSLK	2	Y	2	2	12	ECM33-N304FS	0	FALSE	0	0.99	FALSE	1
812	1270.16	12	ECM33-N304FS		1	VQTVGGAIEVTGNFSTLDLSSLK	VQTVGGAIEVTGN[812]FSTLDLSSLK	2	Y	2	2	12	ECM33-N304FS	0	FALSE	0	0.99	FALSE	1
837	1270.16	12	ECM33-N304FS		1	VQTVGGAIEVTGNFSTLDLSSLK	VQTVGGAIEVTGN[837]FSTLDLSSLK	2	Y	2	2	12	ECM33-N304FS	0	FALSE	0	0.99	FALSE	1
862	1270.16	12	ECM33-N304FS		1	VQTVGGAIEVTGNFSTLDLSSLK	VQTVGGAIEVTGN[862]FSTLDLSSLK	2	Y	2	2	12	ECM33-N304FS	0	FALSE	0	0.99	FALSE	1
887	1270.16	12	ECM33-N304FS		1	VQTVGGAIEVTGNFSTLDLSSLK	VQTVGGAIEVTGN[887]FSTLDLSSLK	2	Y	2	2	12	ECM33-N304FS	0	FALSE	0	0.99	FALSE	1
912	1270.16	12	ECM33-N304FS		1	VQTVGGAIEVTGNFSTLDLSSLK	VQTVGGAIEVTGN[912]FSTLDLSSLK	2	Y	2	2	12	ECM33-N304FS	0	FALSE	0	0.99	FALSE	1
937	1270.16	12	ECM33-N304FS		1	VQTVGGAIEVTGNFSTLDLSSLK	VQTVGGAIEVTGN[937]FSTLDLSSLK	2	Y	2	2	12	ECM33-N304FS	0	FALSE	0	0.99	FALSE	1
962	1270.16	12	ECM33-N304FS		1	VQTVGGAIEVTGNFSTLDLSSLK	VQTVGGAIEVTGN[962]FSTLDLSSLK	2	Y	2	2	12	ECM33-N304FS	0	FALSE	0	0.99	FALSE	1
987	1270.16	12	ECM33-N304FS		1	VQTVGGAIEVTGNFSTLDLSSLK	VQTVGGAIEVTGN[987]FSTLDLSSLK	2	Y	2	2	12	ECM33-N304FS	0	FALSE	0	0.99	FALSE	1
1012	1270.16	12	ECM33-N304FS		1	VQTVGGAIEVTGNFSTLDLSSLK	VQTVGGAIEVTGN[1012]FSTLDLSSLK	2	Y	2	2	12	ECM33-N304FS	0	FALSE	0	0.99	FALSE	1
1037	1270.16	12	ECM33-N304FS		1	VQTVGGAIEVTGNFSTLDLSSLK	VQTVGGAIEVTGN[1037]FSTLDLSSLK	2	Y	2	2	12	ECM33-N304FS	0	FALSE	0	0.99	FALSE	1
1062	1270.16	12	ECM33-N304FS		1	VQTVGGAIEVTGNFSTLDLSSLK	VQTVGGAIEVTGN[1062]FSTLDLSSLK	2	Y	2	2	12	ECM33-N304FS	0	FALSE	0	0.99	FALSE	1
1087	1270.16	12	ECM33-N304FS		1	VQTVGGAIEVTGNFSTLDLSSLK	VQTVGGAIEVTGN[1087]FSTLDLSSLK	2	Y	2	2	12	ECM33-N304FS	0	FALSE	0	0.99	FALSE	1
1112	1270.16	12	ECM33-N304FS		1	VQTVGGAIEVTGNFSTLDLSSLK	VQTVGGAIEVTGN[1112]FSTLDLSSLK	2	Y	2	2	12	ECM33-N304FS	0	FALSE	0	0.99	FALSE	1
1137	1270.16	12	ECM33-N304FS		1	VQTVGGAIEVTGNFSTLDLSSLK	VQTVGGAIEVTGN[1137]FSTLDLSSLK	2	Y	2	2	12	ECM33-N304FS	0	FALSE	0	0.99	FALSE	1
1162	1270.16	12	ECM33-N304FS		1	VQTVGGAIEVTGNFSTLDLSSLK	VQTVGGAIEVTGN[1162]FSTLDLSSLK	2	Y	2	2	12	ECM33-N304FS	0	FALSE	0	0.99	FALSE	1
1187	1270.16	12	ECM33-N304FS		1	VQTVGGAIEVTGNFSTLDLSSLK	VQTVGGAIEVTGN[1187]FSTLDLSSLK	2	Y	2	2	12	ECM33-N304FS	0	FALSE	0	0.99	FALSE	1
1212	1270.16	12	ECM33-N304FS		1	VQTVGGAIEVTGNFSTLDLSSLK	VQTVGGAIEVTGN[1212]FSTLDLSSLK	2	Y	2	2	12	ECM33-N304FS	0	FALSE	0	0.99	FALSE	1
1237	1270.16	12	ECM33-N304FS		1	VQTVGGAIEVTGNFSTLDLSSLK	VQTVGGAIEVTGN[1237]FSTLDLSSLK	2	Y	2	2	12	ECM33-N304FS	0	FALSE	0	0.99	FALSE	1
412.5	1371.7	12	ECM33-N304FS		1	VQTVGGAIEVTGNFSTLDLSSLK	VQTVGGAIEVTGN[412]FSTLDLSSLK	2	Y	2	3	12	ECM33-N304FS	0	FALSE	0	0.99	FALSE	1
437	1371.7	12	ECM33-N304FS		1	VQTVGGAIEVTGNFSTLDLSSLK	VQTVGGAIEVTGN[437]FSTLDLSSLK	2	Y	2	3	12	ECM33-N304FS	0	FALSE	0	0.99	FALSE	1
462	1371.7	12	ECM33-N304FS		1	VQTVGGAIEVTGNFSTLDLSSLK	VQTVGGAIEVTGN[462]FSTLDLSSLK	2	Y	2	3	12	ECM33-N304FS	0	FALSE	0	0.99	FALSE	1
487	1371.7	12	ECM33-N304FS		1	VQTVGGAIEVTGNFSTLDLSSLK	VQTVGGAIEVTGN[487]FSTLDLSSLK	2	Y	2	3	12	ECM33-N304FS	0	FALSE	0	0.99	FALSE	1
512	1371.7	12	ECM33-N304FS		1	VQTVGGAIEVTGNFSTLDLSSLK	VQTVGGAIEVTGN[512]FSTLDLSSLK	2	Y	2	3	12	ECM33-N304FS	0	FALSE	0	0.99	FALSE	1
537	1371.7	12	ECM33-N304FS		1	VQTVGGAIEVTGNFSTLDLSSLK	VQTVGGAIEVTGN[537]FSTLDLSSLK	2	Y	2	3	12	ECM33-N304FS	0	FALSE	0	0.99	FALSE	1
562	1371.7	12	ECM33-N304FS		1	VQTVGGAIEVTGNFSTLDLSSLK	VQTVGGAIEVTGN[562]FSTLDLSSLK	2	Y	2	3	12	ECM33-N304FS	0	FALSE	0	0.99	FALSE	1
587	1371.7	12	ECM33-N304FS		1	VQTVGGAIEVTGNFSTLDLSSLK	VQTVGGAIEVTGN[587]FSTLDLSSLK	2	Y	2	3	12	ECM33-N304FS	0	FALSE	0	0.99	FALSE	1
612	1371.7	12	ECM33-N304FS		1	VQTVGGAIEVTGNFSTLDLSSLK	VQTVGGAIEVTGN[612]FSTLDLSSLK	2	Y	2	3	12	ECM33-N304FS	0	FALSE	0	0.99	FALSE	1
637	1371.7	12	ECM33-N304FS		1	VQTVGGAIEVTGNFSTLDLSSLK	VQTVGGAIEVTGN[637]FSTLDLSSLK	2	Y	2	3	12	ECM33-N304FS	0	FALSE	0	0.99	FALSE	1
662	1371.7	12	ECM33-N304FS		1	VQTVGGAIEVTGNFSTLDLSSLK	VQTVGGAIEVTGN[662]FSTLDLSSLK	2	Y	2	3	12	ECM33-N304FS	0	FALSE	0	0.99	FALSE	1
687	1371.7	12	ECM33-N304FS		1	VQTVGGAIEVTGNFSTLDLSSLK	VQTVGGAIEVTGN[687]FSTLDLSSLK	2	Y	2	3	12	ECM33-N304FS	0	FALSE	0	0.99	FALSE	1
712	1371.7	12	ECM33-N304FS		1	VQTVGGAIEVTGNFSTLDLSSLK	VQTVGGAIEVTGN[712]FSTLDLSSLK	2	Y	2	3	12	ECM33-N304FS	0	FALSE	0	0.99	FALSE	1
737	1371.7	12	ECM33-N304FS		1	VQTVGGAIEVTGNFSTLDLSSLK	VQTVGGAIEVTGN[737]FSTLDLSSLK	2	Y	2	3	12	ECM33-N304FS	0	FALSE	0	0.99	FALSE	1
762	1371.7	12	ECM33-N304FS		1	VQTVGGAIEVTGNFSTLDLSSLK	VQTVGGAIEVTGN[762]FSTLDLSSLK	2	Y	2	3	12	ECM33-N304FS	0	FALSE	0	0.99	FALSE	1
787	1371.7	12	ECM33-N304FS		1	VQTVGGAIEVTGNFSTLDLSSLK	VQTVGGAIEVTGN[787]FSTLDLSSLK	2	Y	2	3	12	ECM33-N304FS	0	FALSE	0	0.99	FALSE	1
812	1371.7	12	ECM33-N304FS		1	VQTVGGAIEVTGNFSTLDLSSLK	VQTVGGAIEVTGN[812]FSTLDLSSLK	2	Y	2	3	12	ECM33-N304FS	0	FALSE	0	0.99	FALSE	1
837	1371.7	12	ECM33-N304FS		1	VQTVGGAIEVTGNFSTLDLSSLK	VQTVGGAIEVTGN[837]FSTLDLSSLK	2	Y	2	3	12	ECM33-N304FS	0	FALSE	0	0.99	FALSE	1
862	1371.7	12	ECM33-N304FS		1	VQTVGGAIEVTGNFSTLDLSSLK	VQTVGGAIEVTGN[862]FSTLDLSSLK	2	Y	2	3	12	ECM33-N304FS	0	FALSE	0	0.99	FALSE	1
887	1371.7	12	ECM33-N304FS		1	VQTVGGAIEVTGNFSTLDLSSLK	VQTVGGAIEVTGN[887]FSTLDLSSLK	2	Y	2	3	12	ECM33-N304FS	0	FALSE	0	0.99	FALSE	1
912	1371.7	12	ECM33-N304FS		1	VQTVGGAIEVTGNFSTLDLSSLK	VQTVGGAIEVTGN[912]FSTLDLSSLK	2	Y	2	3	12	ECM33-N304FS	0	FALSE	0	0.99	FALSE	1
937	1371.7	12	ECM33-N304FS		1	VQTVGGAIEVTGNFSTLDLSSLK	VQTVGGAIEVTGN[937]FSTLDLSSLK	2	Y	2	3	12	ECM33-N304FS	0	FALSE	0	0.99	FALSE	1
962	1371.7	12	ECM33-N304FS		1	VQTVGGAIEVTGNFSTLDLSSLK	VQTVGGAIEVTGN[962]FSTLDLSSLK	2	Y	2	3	12	ECM33-N304FS	0	FALSE	0	0.99	FALSE	1
987	1371.7	12	ECM33-N304FS		1	VQTVGGAIEVTGNFSTLDLSSLK	VQTVGGAIEVTGN[987]FSTLDLSSLK	2	Y	2	3	12	ECM33-N304FS	0	FALSE	0	0.99	FALSE	1
1012	1371.7	12	ECM33-N304FS		1	VQTVGGAIEVTGNFSTLDLSSLK	VQTVGGAIEVTGN[1012]FSTLDLSSLK	2	Y	2	3	12	ECM33-N304FS	0	FALSE	0	0.99	FALSE	1
1037	1371.7	12	ECM33-N304FS		1	VQTVGGAIEVTGNFSTLDLSSLK	VQTVGGAIEVTGN[1037]FSTLDLSSLK	2	Y	2	3	12	ECM33-N304FS	0	FALSE	0	0.99	FALSE	1
1062	1371.7	12	ECM33-N304FS		1	VQTVGGAIEVTGNFSTLDLSSLK	VQTVGGAIEVTGN[1062]FSTLDLSSLK	2	Y	2	3	12	ECM33-N304FS	0	FALSE	0	0.99	FALSE	1
1087	1371.7	12	ECM33-N304FS		1	VQTVGGAIEVTGNFSTLDLSSLK	VQTVGGAIEVTGN[1087]FSTLDLSSLK	2	Y	2	3	12	ECM33-N304FS	0	FALSE	0	0.99	FALSE	1
1112	1371.7	12	ECM33-N304FS		1	VQTVGGAIEVTGNFSTLDLSSLK	VQTVGGAIEVTGN[1112]FSTLDLSSLK	2	Y	2	3	12	ECM33-N304FS	0	FALSE	0	0.99	FALSE	1
1137	1371.7	12	ECM33-N304FS		1	VQTVGGAIEVTGNFSTLDLSSLK	VQTVGGAIEVTGN[1137]FSTLDLSSLK	2	Y	2	3	12	ECM33-N304FS	0	FALSE	0	0.99	FALSE	1
1162	1371.7	12	ECM33-N304FS		1	VQTVGGAIEVTGNFSTLDLSSLK	VQTVGGAIEVTGN[1162]FSTLDLSSLK	2	Y	2	3	12	ECM33-N304FS	0	FALSE	0	0.99	FALSE	1
1187	1371.7	12	ECM33-N304FS		1	VQTVGGAIEVTGNFSTLDLSSLK	VQTVGGAIEVTGN[1187]FSTLDLSSLK	2	Y	2	3	12	ECM33-N304FS	0	FALSE	0	0.99	FALSE	1
1212	1371.7	12	ECM33-N304FS		1	VQTVGGAIEVTGNFSTLDLSSLK	VQTVGGAIEVTGN[1212]FSTLDLSSLK	2	Y	2	3	12	ECM33-N304FS	0	FALSE	0	0.99	FALSE	1
1237	1371.7	12	ECM33-N304FS		1	VQTVGGAIEVTGNFSTLDLSSLK	VQTVGGAIEVTGN[1237]FSTLDLSSLK	2	Y	2	3	12	ECM33-N304FS	0	FALSE	0	0.99	FALSE	1
