# Supplementary material for: DIALib: an automated ion library generator for data independent acquisition mass spectrometry analysis of peptides and glycopeptides
Source: bioRxiv preprint, doi:10.1101/696518, version 2 (2020-01-21)
Supplement: Supplementary Table S5 [file 696518_file05.xlsx]

## Sheet: Supplementary Table S5_by
Q1	Q3	RT_detected	protein_name	isotype	relative_intensity	stripped_sequence	modification_sequence	prec_z	frg_type	frg_z	frg_nr	iRT	uniprot_id	score	decoy	prec_y	confidence	shared	N	rank	mods	nterm	cterm
412.5	214.119	12	GAS3-N350VS		1	NVSLPTTK	NVSLPTTK[412]	2	b	1	2	12	GAS3-N350VS	0	FALSE	0	0.99	FALSE	1
437	214.119	12	GAS3-N350VS		1	NVSLPTTK	NVSLPTTK[437]	2	b	1	2	12	GAS3-N350VS	0	FALSE	0	0.99	FALSE	1
462	214.119	12	GAS3-N350VS		1	NVSLPTTK	NVSLPTTK[462]	2	b	1	2	12	GAS3-N350VS	0	FALSE	0	0.99	FALSE	1
487	214.119	12	GAS3-N350VS		1	NVSLPTTK	NVSLPTTK[487]	2	b	1	2	12	GAS3-N350VS	0	FALSE	0	0.99	FALSE	1
512	214.119	12	GAS3-N350VS		1	NVSLPTTK	NVSLPTTK[512]	2	b	1	2	12	GAS3-N350VS	0	FALSE	0	0.99	FALSE	1
537	214.119	12	GAS3-N350VS		1	NVSLPTTK	NVSLPTTK[537]	2	b	1	2	12	GAS3-N350VS	0	FALSE	0	0.99	FALSE	1
562	214.119	12	GAS3-N350VS		1	NVSLPTTK	NVSLPTTK[562]	2	b	1	2	12	GAS3-N350VS	0	FALSE	0	0.99	FALSE	1
587	214.119	12	GAS3-N350VS		1	NVSLPTTK	NVSLPTTK[587]	2	b	1	2	12	GAS3-N350VS	0	FALSE	0	0.99	FALSE	1
612	214.119	12	GAS3-N350VS		1	NVSLPTTK	NVSLPTTK[612]	2	b	1	2	12	GAS3-N350VS	0	FALSE	0	0.99	FALSE	1
637	214.119	12	GAS3-N350VS		1	NVSLPTTK	NVSLPTTK[637]	2	b	1	2	12	GAS3-N350VS	0	FALSE	0	0.99	FALSE	1
662	214.119	12	GAS3-N350VS		1	NVSLPTTK	NVSLPTTK[662]	2	b	1	2	12	GAS3-N350VS	0	FALSE	0	0.99	FALSE	1
687	214.119	12	GAS3-N350VS		1	NVSLPTTK	NVSLPTTK[687]	2	b	1	2	12	GAS3-N350VS	0	FALSE	0	0.99	FALSE	1
712	214.119	12	GAS3-N350VS		1	NVSLPTTK	NVSLPTTK[712]	2	b	1	2	12	GAS3-N350VS	0	FALSE	0	0.99	FALSE	1
737	214.119	12	GAS3-N350VS		1	NVSLPTTK	NVSLPTTK[737]	2	b	1	2	12	GAS3-N350VS	0	FALSE	0	0.99	FALSE	1
762	214.119	12	GAS3-N350VS		1	NVSLPTTK	NVSLPTTK[762]	2	b	1	2	12	GAS3-N350VS	0	FALSE	0	0.99	FALSE	1
787	214.119	12	GAS3-N350VS		1	NVSLPTTK	NVSLPTTK[787]	2	b	1	2	12	GAS3-N350VS	0	FALSE	0	0.99	FALSE	1
812	214.119	12	GAS3-N350VS		1	NVSLPTTK	NVSLPTTK[812]	2	b	1	2	12	GAS3-N350VS	0	FALSE	0	0.99	FALSE	1
837	214.119	12	GAS3-N350VS		1	NVSLPTTK	NVSLPTTK[837]	2	b	1	2	12	GAS3-N350VS	0	FALSE	0	0.99	FALSE	1
862	214.119	12	GAS3-N350VS		1	NVSLPTTK	NVSLPTTK[862]	2	b	1	2	12	GAS3-N350VS	0	FALSE	0	0.99	FALSE	1
887	214.119	12	GAS3-N350VS		1	NVSLPTTK	NVSLPTTK[887]	2	b	1	2	12	GAS3-N350VS	0	FALSE	0	0.99	FALSE	1
912	214.119	12	GAS3-N350VS		1	NVSLPTTK	NVSLPTTK[912]	2	b	1	2	12	GAS3-N350VS	0	FALSE	0	0.99	FALSE	1
937	214.119	12	GAS3-N350VS		1	NVSLPTTK	NVSLPTTK[937]	2	b	1	2	12	GAS3-N350VS	0	FALSE	0	0.99	FALSE	1
962	214.119	12	GAS3-N350VS		1	NVSLPTTK	NVSLPTTK[962]	2	b	1	2	12	GAS3-N350VS	0	FALSE	0	0.99	FALSE	1
987	214.119	12	GAS3-N350VS		1	NVSLPTTK	NVSLPTTK[987]	2	b	1	2	12	GAS3-N350VS	0	FALSE	0	0.99	FALSE	1
1012	214.119	12	GAS3-N350VS		1	NVSLPTTK	NVSLPTTK[1012]	2	b	1	2	12	GAS3-N350VS	0	FALSE	0	0.99	FALSE	1
1037	214.119	12	GAS3-N350VS		1	NVSLPTTK	NVSLPTTK[1037]	2	b	1	2	12	GAS3-N350VS	0	FALSE	0	0.99	FALSE	1
1062	214.119	12	GAS3-N350VS		1	NVSLPTTK	NVSLPTTK[1062]	2	b	1	2	12	GAS3-N350VS	0	FALSE	0	0.99	FALSE	1
1087	214.119	12	GAS3-N350VS		1	NVSLPTTK	NVSLPTTK[1087]	2	b	1	2	12	GAS3-N350VS	0	FALSE	0	0.99	FALSE	1
1112	214.119	12	GAS3-N350VS		1	NVSLPTTK	NVSLPTTK[1112]	2	b	1	2	12	GAS3-N350VS	0	FALSE	0	0.99	FALSE	1
1137	214.119	12	GAS3-N350VS		1	NVSLPTTK	NVSLPTTK[1137]	2	b	1	2	12	GAS3-N350VS	0	FALSE	0	0.99	FALSE	1
1162	214.119	12	GAS3-N350VS		1	NVSLPTTK	NVSLPTTK[1162]	2	b	1	2	12	GAS3-N350VS	0	FALSE	0	0.99	FALSE	1
1187	214.119	12	GAS3-N350VS		1	NVSLPTTK	NVSLPTTK[1187]	2	b	1	2	12	GAS3-N350VS	0	FALSE	0	0.99	FALSE	1
1212	214.119	12	GAS3-N350VS		1	NVSLPTTK	NVSLPTTK[1212]	2	b	1	2	12	GAS3-N350VS	0	FALSE	0	0.99	FALSE	1
1237	214.119	12	GAS3-N350VS		1	NVSLPTTK	NVSLPTTK[1237]	2	b	1	2	12	GAS3-N350VS	0	FALSE	0	0.99	FALSE	1
412.5	248.161	12	GAS3-N350VS		1	NVSLPTTK	NVSLPTTK[412]	2	y	1	2	12	GAS3-N350VS	0	FALSE	0	0.99	FALSE	1
437	248.161	12	GAS3-N350VS		1	NVSLPTTK	NVSLPTTK[437]	2	y	1	2	12	GAS3-N350VS	0	FALSE	0	0.99	FALSE	1
462	248.161	12	GAS3-N350VS		1	NVSLPTTK	NVSLPTTK[462]	2	y	1	2	12	GAS3-N350VS	0	FALSE	0	0.99	FALSE	1
487	248.161	12	GAS3-N350VS		1	NVSLPTTK	NVSLPTTK[487]	2	y	1	2	12	GAS3-N350VS	0	FALSE	0	0.99	FALSE	1
512	248.161	12	GAS3-N350VS		1	NVSLPTTK	NVSLPTTK[512]	2	y	1	2	12	GAS3-N350VS	0	FALSE	0	0.99	FALSE	1
537	248.161	12	GAS3-N350VS		1	NVSLPTTK	NVSLPTTK[537]	2	y	1	2	12	GAS3-N350VS	0	FALSE	0	0.99	FALSE	1
562	248.161	12	GAS3-N350VS		1	NVSLPTTK	NVSLPTTK[562]	2	y	1	2	12	GAS3-N350VS	0	FALSE	0	0.99	FALSE	1
587	248.161	12	GAS3-N350VS		1	NVSLPTTK	NVSLPTTK[587]	2	y	1	2	12	GAS3-N350VS	0	FALSE	0	0.99	FALSE	1
612	248.161	12	GAS3-N350VS		1	NVSLPTTK	NVSLPTTK[612]	2	y	1	2	12	GAS3-N350VS	0	FALSE	0	0.99	FALSE	1
637	248.161	12	GAS3-N350VS		1	NVSLPTTK	NVSLPTTK[637]	2	y	1	2	12	GAS3-N350VS	0	FALSE	0	0.99	FALSE	1
662	248.161	12	GAS3-N350VS		1	NVSLPTTK	NVSLPTTK[662]	2	y	1	2	12	GAS3-N350VS	0	FALSE	0	0.99	FALSE	1
687	248.161	12	GAS3-N350VS		1	NVSLPTTK	NVSLPTTK[687]	2	y	1	2	12	GAS3-N350VS	0	FALSE	0	0.99	FALSE	1
712	248.161	12	GAS3-N350VS		1	NVSLPTTK	NVSLPTTK[712]	2	y	1	2	12	GAS3-N350VS	0	FALSE	0	0.99	FALSE	1
737	248.161	12	GAS3-N350VS		1	NVSLPTTK	NVSLPTTK[737]	2	y	1	2	12	GAS3-N350VS	0	FALSE	0	0.99	FALSE	1
762	248.161	12	GAS3-N350VS		1	NVSLPTTK	NVSLPTTK[762]	2	y	1	2	12	GAS3-N350VS	0	FALSE	0	0.99	FALSE	1
787	248.161	12	GAS3-N350VS		1	NVSLPTTK	NVSLPTTK[787]	2	y	1	2	12	GAS3-N350VS	0	FALSE	0	0.99	FALSE	1
812	248.161	12	GAS3-N350VS		1	NVSLPTTK	NVSLPTTK[812]	2	y	1	2	12	GAS3-N350VS	0	FALSE	0	0.99	FALSE	1
837	248.161	12	GAS3-N350VS		1	NVSLPTTK	NVSLPTTK[837]	2	y	1	2	12	GAS3-N350VS	0	FALSE	0	0.99	FALSE	1
862	248.161	12	GAS3-N350VS		1	NVSLPTTK	NVSLPTTK[862]	2	y	1	2	12	GAS3-N350VS	0	FALSE	0	0.99	FALSE	1
887	248.161	12	GAS3-N350VS		1	NVSLPTTK	NVSLPTTK[887]	2	y	1	2	12	GAS3-N350VS	0	FALSE	0	0.99	FALSE	1
912	248.161	12	GAS3-N350VS		1	NVSLPTTK	NVSLPTTK[912]	2	y	1	2	12	GAS3-N350VS	0	FALSE	0	0.99	FALSE	1
937	248.161	12	GAS3-N350VS		1	NVSLPTTK	NVSLPTTK[937]	2	y	1	2	12	GAS3-N350VS	0	FALSE	0	0.99	FALSE	1
962	248.161	12	GAS3-N350VS		1	NVSLPTTK	NVSLPTTK[962]	2	y	1	2	12	GAS3-N350VS	0	FALSE	0	0.99	FALSE	1
987	248.161	12	GAS3-N350VS		1	NVSLPTTK	NVSLPTTK[987]	2	y	1	2	12	GAS3-N350VS	0	FALSE	0	0.99	FALSE	1
1012	248.161	12	GAS3-N350VS		1	NVSLPTTK	NVSLPTTK[1012]	2	y	1	2	12	GAS3-N350VS	0	FALSE	0	0.99	FALSE	1
1037	248.161	12	GAS3-N350VS		1	NVSLPTTK	NVSLPTTK[1037]	2	y	1	2	12	GAS3-N350VS	0	FALSE	0	0.99	FALSE	1
1062	248.161	12	GAS3-N350VS		1	NVSLPTTK	NVSLPTTK[1062]	2	y	1	2	12	GAS3-N350VS	0	FALSE	0	0.99	FALSE	1
1087	248.161	12	GAS3-N350VS		1	NVSLPTTK	NVSLPTTK[1087]	2	y	1	2	12	GAS3-N350VS	0	FALSE	0	0.99	FALSE	1
1112	248.161	12	GAS3-N350VS		1	NVSLPTTK	NVSLPTTK[1112]	2	y	1	2	12	GAS3-N350VS	0	FALSE	0	0.99	FALSE	1
1137	248.161	12	GAS3-N350VS		1	NVSLPTTK	NVSLPTTK[1137]	2	y	1	2	12	GAS3-N350VS	0	FALSE	0	0.99	FALSE	1
1162	248.161	12	GAS3-N350VS		1	NVSLPTTK	NVSLPTTK[1162]	2	y	1	2	12	GAS3-N350VS	0	FALSE	0	0.99	FALSE	1
1187	248.161	12	GAS3-N350VS		1	NVSLPTTK	NVSLPTTK[1187]	2	y	1	2	12	GAS3-N350VS	0	FALSE	0	0.99	FALSE	1
1212	248.161	12	GAS3-N350VS		1	NVSLPTTK	NVSLPTTK[1212]	2	y	1	2	12	GAS3-N350VS	0	FALSE	0	0.99	FALSE	1
1237	248.161	12	GAS3-N350VS		1	NVSLPTTK	NVSLPTTK[1237]	2	y	1	2	12	GAS3-N350VS	0	FALSE	0	0.99	FALSE	1
412.5	107.563	12	GAS3-N350VS		1	NVSLPTTK	NVSLPTTK[412]	2	b	2	2	12	GAS3-N350VS	0	FALSE	0	0.99	FALSE	1
437	107.563	12	GAS3-N350VS		1	NVSLPTTK	NVSLPTTK[437]	2	b	2	2	12	GAS3-N350VS	0	FALSE	0	0.99	FALSE	1
462	107.563	12	GAS3-N350VS		1	NVSLPTTK	NVSLPTTK[462]	2	b	2	2	12	GAS3-N350VS	0	FALSE	0	0.99	FALSE	1
487	107.563	12	GAS3-N350VS		1	NVSLPTTK	NVSLPTTK[487]	2	b	2	2	12	GAS3-N350VS	0	FALSE	0	0.99	FALSE	1
512	107.563	12	GAS3-N350VS		1	NVSLPTTK	NVSLPTTK[512]	2	b	2	2	12	GAS3-N350VS	0	FALSE	0	0.99	FALSE	1
537	107.563	12	GAS3-N350VS		1	NVSLPTTK	NVSLPTTK[537]	2	b	2	2	12	GAS3-N350VS	0	FALSE	0	0.99	FALSE	1
562	107.563	12	GAS3-N350VS		1	NVSLPTTK	NVSLPTTK[562]	2	b	2	2	12	GAS3-N350VS	0	FALSE	0	0.99	FALSE	1
587	107.563	12	GAS3-N350VS		1	NVSLPTTK	NVSLPTTK[587]	2	b	2	2	12	GAS3-N350VS	0	FALSE	0	0.99	FALSE	1
612	107.563	12	GAS3-N350VS		1	NVSLPTTK	NVSLPTTK[612]	2	b	2	2	12	GAS3-N350VS	0	FALSE	0	0.99	FALSE	1
637	107.563	12	GAS3-N350VS		1	NVSLPTTK	NVSLPTTK[637]	2	b	2	2	12	GAS3-N350VS	0	FALSE	0	0.99	FALSE	1
662	107.563	12	GAS3-N350VS		1	NVSLPTTK	NVSLPTTK[662]	2	b	2	2	12	GAS3-N350VS	0	FALSE	0	0.99	FALSE	1
687	107.563	12	GAS3-N350VS		1	NVSLPTTK	NVSLPTTK[687]	2	b	2	2	12	GAS3-N350VS	0	FALSE	0	0.99	FALSE	1
712	107.563	12	GAS3-N350VS		1	NVSLPTTK	NVSLPTTK[712]	2	b	2	2	12	GAS3-N350VS	0	FALSE	0	0.99	FALSE	1
737	107.563	12	GAS3-N350VS		1	NVSLPTTK	NVSLPTTK[737]	2	b	2	2	12	GAS3-N350VS	0	FALSE	0	0.99	FALSE	1
762	107.563	12	GAS3-N350VS		1	NVSLPTTK	NVSLPTTK[762]	2	b	2	2	12	GAS3-N350VS	0	FALSE	0	0.99	FALSE	1
787	107.563	12	GAS3-N350VS		1	NVSLPTTK	NVSLPTTK[787]	2	b	2	2	12	GAS3-N350VS	0	FALSE	0	0.99	FALSE	1
812	107.563	12	GAS3-N350VS		1	NVSLPTTK	NVSLPTTK[812]	2	b	2	2	12	GAS3-N350VS	0	FALSE	0	0.99	FALSE	1
837	107.563	12	GAS3-N350VS		1	NVSLPTTK	NVSLPTTK[837]	2	b	2	2	12	GAS3-N350VS	0	FALSE	0	0.99	FALSE	1
862	107.563	12	GAS3-N350VS		1	NVSLPTTK	NVSLPTTK[862]	2	b	2	2	12	GAS3-N350VS	0	FALSE	0	0.99	FALSE	1
887	107.563	12	GAS3-N350VS		1	NVSLPTTK	NVSLPTTK[887]	2	b	2	2	12	GAS3-N350VS	0	FALSE	0	0.99	FALSE	1
912	107.563	12	GAS3-N350VS		1	NVSLPTTK	NVSLPTTK[912]	2	b	2	2	12	GAS3-N350VS	0	FALSE	0	0.99	FALSE	1
937	107.563	12	GAS3-N350VS		1	NVSLPTTK	NVSLPTTK[937]	2	b	2	2	12	GAS3-N350VS	0	FALSE	0	0.99	FALSE	1
962	107.563	12	GAS3-N350VS		1	NVSLPTTK	NVSLPTTK[962]	2	b	2	2	12	GAS3-N350VS	0	FALSE	0	0.99	FALSE	1
987	107.563	12	GAS3-N350VS		1	NVSLPTTK	NVSLPTTK[987]	2	b	2	2	12	GAS3-N350VS	0	FALSE	0	0.99	FALSE	1
1012	107.563	12	GAS3-N350VS		1	NVSLPTTK	NVSLPTTK[1012]	2	b	2	2	12	GAS3-N350VS	0	FALSE	0	0.99	FALSE	1
1037	107.563	12	GAS3-N350VS		1	NVSLPTTK	NVSLPTTK[1037]	2	b	2	2	12	GAS3-N350VS	0	FALSE	0	0.99	FALSE	1
1062	107.563	12	GAS3-N350VS		1	NVSLPTTK	NVSLPTTK[1062]	2	b	2	2	12	GAS3-N350VS	0	FALSE	0	0.99	FALSE	1
1087	107.563	12	GAS3-N350VS		1	NVSLPTTK	NVSLPTTK[1087]	2	b	2	2	12	GAS3-N350VS	0	FALSE	0	0.99	FALSE	1
1112	107.563	12	GAS3-N350VS		1	NVSLPTTK	NVSLPTTK[1112]	2	b	2	2	12	GAS3-N350VS	0	FALSE	0	0.99	FALSE	1
1137	107.563	12	GAS3-N350VS		1	NVSLPTTK	NVSLPTTK[1137]	2	b	2	2	12	GAS3-N350VS	0	FALSE	0	0.99	FALSE	1
1162	107.563	12	GAS3-N350VS		1	NVSLPTTK	NVSLPTTK[1162]	2	b	2	2	12	GAS3-N350VS	0	FALSE	0	0.99	FALSE	1
1187	107.563	12	GAS3-N350VS		1	NVSLPTTK	NVSLPTTK[1187]	2	b	2	2	12	GAS3-N350VS	0	FALSE	0	0.99	FALSE	1
1212	107.563	12	GAS3-N350VS		1	NVSLPTTK	NVSLPTTK[1212]	2	b	2	2	12	GAS3-N350VS	0	FALSE	0	0.99	FALSE	1
1237	107.563	12	GAS3-N350VS		1	NVSLPTTK	NVSLPTTK[1237]	2	b	2	2	12	GAS3-N350VS	0	FALSE	0	0.99	FALSE	1
412.5	124.584	12	GAS3-N350VS		1	NVSLPTTK	NVSLPTTK[412]	2	y	2	2	12	GAS3-N350VS	0	FALSE	0	0.99	FALSE	1
437	124.584	12	GAS3-N350VS		1	NVSLPTTK	NVSLPTTK[437]	2	y	2	2	12	GAS3-N350VS	0	FALSE	0	0.99	FALSE	1
462	124.584	12	GAS3-N350VS		1	NVSLPTTK	NVSLPTTK[462]	2	y	2	2	12	GAS3-N350VS	0	FALSE	0	0.99	FALSE	1
487	124.584	12	GAS3-N350VS		1	NVSLPTTK	NVSLPTTK[487]	2	y	2	2	12	GAS3-N350VS	0	FALSE	0	0.99	FALSE	1
512	124.584	12	GAS3-N350VS		1	NVSLPTTK	NVSLPTTK[512]	2	y	2	2	12	GAS3-N350VS	0	FALSE	0	0.99	FALSE	1
537	124.584	12	GAS3-N350VS		1	NVSLPTTK	NVSLPTTK[537]	2	y	2	2	12	GAS3-N350VS	0	FALSE	0	0.99	FALSE	1
562	124.584	12	GAS3-N350VS		1	NVSLPTTK	NVSLPTTK[562]	2	y	2	2	12	GAS3-N350VS	0	FALSE	0	0.99	FALSE	1
587	124.584	12	GAS3-N350VS		1	NVSLPTTK	NVSLPTTK[587]	2	y	2	2	12	GAS3-N350VS	0	FALSE	0	0.99	FALSE	1
612	124.584	12	GAS3-N350VS		1	NVSLPTTK	NVSLPTTK[612]	2	y	2	2	12	GAS3-N350VS	0	FALSE	0	0.99	FALSE	1
637	124.584	12	GAS3-N350VS		1	NVSLPTTK	NVSLPTTK[637]	2	y	2	2	12	GAS3-N350VS	0	FALSE	0	0.99	FALSE	1
662	124.584	12	GAS3-N350VS		1	NVSLPTTK	NVSLPTTK[662]	2	y	2	2	12	GAS3-N350VS	0	FALSE	0	0.99	FALSE	1
687	124.584	12	GAS3-N350VS		1	NVSLPTTK	NVSLPTTK[687]	2	y	2	2	12	GAS3-N350VS	0	FALSE	0	0.99	FALSE	1
712	124.584	12	GAS3-N350VS		1	NVSLPTTK	NVSLPTTK[712]	2	y	2	2	12	GAS3-N350VS	0	FALSE	0	0.99	FALSE	1
737	124.584	12	GAS3-N350VS		1	NVSLPTTK	NVSLPTTK[737]	2	y	2	2	12	GAS3-N350VS	0	FALSE	0	0.99	FALSE	1
762	124.584	12	GAS3-N350VS		1	NVSLPTTK	NVSLPTTK[762]	2	y	2	2	12	GAS3-N350VS	0	FALSE	0	0.99	FALSE	1
787	124.584	12	GAS3-N350VS		1	NVSLPTTK	NVSLPTTK[787]	2	y	2	2	12	GAS3-N350VS	0	FALSE	0	0.99	FALSE	1
812	124.584	12	GAS3-N350VS		1	NVSLPTTK	NVSLPTTK[812]	2	y	2	2	12	GAS3-N350VS	0	FALSE	0	0.99	FALSE	1
837	124.584	12	GAS3-N350VS		1	NVSLPTTK	NVSLPTTK[837]	2	y	2	2	12	GAS3-N350VS	0	FALSE	0	0.99	FALSE	1
862	124.584	12	GAS3-N350VS		1	NVSLPTTK	NVSLPTTK[862]	2	y	2	2	12	GAS3-N350VS	0	FALSE	0	0.99	FALSE	1
887	124.584	12	GAS3-N350VS		1	NVSLPTTK	NVSLPTTK[887]	2	y	2	2	12	GAS3-N350VS	0	FALSE	0	0.99	FALSE	1
912	124.584	12	GAS3-N350VS		1	NVSLPTTK	NVSLPTTK[912]	2	y	2	2	12	GAS3-N350VS	0	FALSE	0	0.99	FALSE	1
937	124.584	12	GAS3-N350VS		1	NVSLPTTK	NVSLPTTK[937]	2	y	2	2	12	GAS3-N350VS	0	FALSE	0	0.99	FALSE	1
962	124.584	12	GAS3-N350VS		1	NVSLPTTK	NVSLPTTK[962]	2	y	2	2	12	GAS3-N350VS	0	FALSE	0	0.99	FALSE	1
987	124.584	12	GAS3-N350VS		1	NVSLPTTK	NVSLPTTK[987]	2	y	2	2	12	GAS3-N350VS	0	FALSE	0	0.99	FALSE	1
1012	124.584	12	GAS3-N350VS		1	NVSLPTTK	NVSLPTTK[1012]	2	y	2	2	12	GAS3-N350VS	0	FALSE	0	0.99	FALSE	1
1037	124.584	12	GAS3-N350VS		1	NVSLPTTK	NVSLPTTK[1037]	2	y	2	2	12	GAS3-N350VS	0	FALSE	0	0.99	FALSE	1
1062	124.584	12	GAS3-N350VS		1	NVSLPTTK	NVSLPTTK[1062]	2	y	2	2	12	GAS3-N350VS	0	FALSE	0	0.99	FALSE	1
1087	124.584	12	GAS3-N350VS		1	NVSLPTTK	NVSLPTTK[1087]	2	y	2	2	12	GAS3-N350VS	0	FALSE	0	0.99	FALSE	1
1112	124.584	12	GAS3-N350VS		1	NVSLPTTK	NVSLPTTK[1112]	2	y	2	2	12	GAS3-N350VS	0	FALSE	0	0.99	FALSE	1
1137	124.584	12	GAS3-N350VS		1	NVSLPTTK	NVSLPTTK[1137]	2	y	2	2	12	GAS3-N350VS	0	FALSE	0	0.99	FALSE	1
1162	124.584	12	GAS3-N350VS		1	NVSLPTTK	NVSLPTTK[1162]	2	y	2	2	12	GAS3-N350VS	0	FALSE	0	0.99	FALSE	1
1187	124.584	12	GAS3-N350VS		1	NVSLPTTK	NVSLPTTK[1187]	2	y	2	2	12	GAS3-N350VS	0	FALSE	0	0.99	FALSE	1
1212	124.584	12	GAS3-N350VS		1	NVSLPTTK	NVSLPTTK[1212]	2	y	2	2	12	GAS3-N350VS	0	FALSE	0	0.99	FALSE	1
1237	124.584	12	GAS3-N350VS		1	NVSLPTTK	NVSLPTTK[1237]	2	y	2	2	12	GAS3-N350VS	0	FALSE	0	0.99	FALSE	1
412.5	301.151	12	GAS3-N350VS		1	NVSLPTTK	NVSLPTTK[412]	2	b	1	3	12	GAS3-N350VS	0	FALSE	0	0.99	FALSE	1
437	301.151	12	GAS3-N350VS		1	NVSLPTTK	NVSLPTTK[437]	2	b	1	3	12	GAS3-N350VS	0	FALSE	0	0.99	FALSE	1
462	301.151	12	GAS3-N350VS		1	NVSLPTTK	NVSLPTTK[462]	2	b	1	3	12	GAS3-N350VS	0	FALSE	0	0.99	FALSE	1
487	301.151	12	GAS3-N350VS		1	NVSLPTTK	NVSLPTTK[487]	2	b	1	3	12	GAS3-N350VS	0	FALSE	0	0.99	FALSE	1
512	301.151	12	GAS3-N350VS		1	NVSLPTTK	NVSLPTTK[512]	2	b	1	3	12	GAS3-N350VS	0	FALSE	0	0.99	FALSE	1
537	301.151	12	GAS3-N350VS		1	NVSLPTTK	NVSLPTTK[537]	2	b	1	3	12	GAS3-N350VS	0	FALSE	0	0.99	FALSE	1
562	301.151	12	GAS3-N350VS		1	NVSLPTTK	NVSLPTTK[562]	2	b	1	3	12	GAS3-N350VS	0	FALSE	0	0.99	FALSE	1
587	301.151	12	GAS3-N350VS		1	NVSLPTTK	NVSLPTTK[587]	2	b	1	3	12	GAS3-N350VS	0	FALSE	0	0.99	FALSE	1
612	301.151	12	GAS3-N350VS		1	NVSLPTTK	NVSLPTTK[612]	2	b	1	3	12	GAS3-N350VS	0	FALSE	0	0.99	FALSE	1
637	301.151	12	GAS3-N350VS		1	NVSLPTTK	NVSLPTTK[637]	2	b	1	3	12	GAS3-N350VS	0	FALSE	0	0.99	FALSE	1
662	301.151	12	GAS3-N350VS		1	NVSLPTTK	NVSLPTTK[662]	2	b	1	3	12	GAS3-N350VS	0	FALSE	0	0.99	FALSE	1
687	301.151	12	GAS3-N350VS		1	NVSLPTTK	NVSLPTTK[687]	2	b	1	3	12	GAS3-N350VS	0	FALSE	0	0.99	FALSE	1
712	301.151	12	GAS3-N350VS		1	NVSLPTTK	NVSLPTTK[712]	2	b	1	3	12	GAS3-N350VS	0	FALSE	0	0.99	FALSE	1
737	301.151	12	GAS3-N350VS		1	NVSLPTTK	NVSLPTTK[737]	2	b	1	3	12	GAS3-N350VS	0	FALSE	0	0.99	FALSE	1
762	301.151	12	GAS3-N350VS		1	NVSLPTTK	NVSLPTTK[762]	2	b	1	3	12	GAS3-N350VS	0	FALSE	0	0.99	FALSE	1
787	301.151	12	GAS3-N350VS		1	NVSLPTTK	NVSLPTTK[787]	2	b	1	3	12	GAS3-N350VS	0	FALSE	0	0.99	FALSE	1
812	301.151	12	GAS3-N350VS		1	NVSLPTTK	NVSLPTTK[812]	2	b	1	3	12	GAS3-N350VS	0	FALSE	0	0.99	FALSE	1
837	301.151	12	GAS3-N350VS		1	NVSLPTTK	NVSLPTTK[837]	2	b	1	3	12	GAS3-N350VS	0	FALSE	0	0.99	FALSE	1
862	301.151	12	GAS3-N350VS		1	NVSLPTTK	NVSLPTTK[862]	2	b	1	3	12	GAS3-N350VS	0	FALSE	0	0.99	FALSE	1
887	301.151	12	GAS3-N350VS		1	NVSLPTTK	NVSLPTTK[887]	2	b	1	3	12	GAS3-N350VS	0	FALSE	0	0.99	FALSE	1
912	301.151	12	GAS3-N350VS		1	NVSLPTTK	NVSLPTTK[912]	2	b	1	3	12	GAS3-N350VS	0	FALSE	0	0.99	FALSE	1
937	301.151	12	GAS3-N350VS		1	NVSLPTTK	NVSLPTTK[937]	2	b	1	3	12	GAS3-N350VS	0	FALSE	0	0.99	FALSE	1
962	301.151	12	GAS3-N350VS		1	NVSLPTTK	NVSLPTTK[962]	2	b	1	3	12	GAS3-N350VS	0	FALSE	0	0.99	FALSE	1
987	301.151	12	GAS3-N350VS		1	NVSLPTTK	NVSLPTTK[987]	2	b	1	3	12	GAS3-N350VS	0	FALSE	0	0.99	FALSE	1
1012	301.151	12	GAS3-N350VS		1	NVSLPTTK	NVSLPTTK[1012]	2	b	1	3	12	GAS3-N350VS	0	FALSE	0	0.99	FALSE	1
1037	301.151	12	GAS3-N350VS		1	NVSLPTTK	NVSLPTTK[1037]	2	b	1	3	12	GAS3-N350VS	0	FALSE	0	0.99	FALSE	1
1062	301.151	12	GAS3-N350VS		1	NVSLPTTK	NVSLPTTK[1062]	2	b	1	3	12	GAS3-N350VS	0	FALSE	0	0.99	FALSE	1
1087	301.151	12	GAS3-N350VS		1	NVSLPTTK	NVSLPTTK[1087]	2	b	1	3	12	GAS3-N350VS	0	FALSE	0	0.99	FALSE	1
1112	301.151	12	GAS3-N350VS		1	NVSLPTTK	NVSLPTTK[1112]	2	b	1	3	12	GAS3-N350VS	0	FALSE	0	0.99	FALSE	1
1137	301.151	12	GAS3-N350VS		1	NVSLPTTK	NVSLPTTK[1137]	2	b	1	3	12	GAS3-N350VS	0	FALSE	0	0.99	FALSE	1
1162	301.151	12	GAS3-N350VS		1	NVSLPTTK	NVSLPTTK[1162]	2	b	1	3	12	GAS3-N350VS	0	FALSE	0	0.99	FALSE	1
1187	301.151	12	GAS3-N350VS		1	NVSLPTTK	NVSLPTTK[1187]	2	b	1	3	12	GAS3-N350VS	0	FALSE	0	0.99	FALSE	1
1212	301.151	12	GAS3-N350VS		1	NVSLPTTK	NVSLPTTK[1212]	2	b	1	3	12	GAS3-N350VS	0	FALSE	0	0.99	FALSE	1
1237	301.151	12	GAS3-N350VS		1	NVSLPTTK	NVSLPTTK[1237]	2	b	1	3	12	GAS3-N350VS	0	FALSE	0	0.99	FALSE	1
412.5	349.208	12	GAS3-N350VS		1	NVSLPTTK	NVSLPTTK[412]	2	y	1	3	12	GAS3-N350VS	0	FALSE	0	0.99	FALSE	1
437	349.208	12	GAS3-N350VS		1	NVSLPTTK	NVSLPTTK[437]	2	y	1	3	12	GAS3-N350VS	0	FALSE	0	0.99	FALSE	1
462	349.208	12	GAS3-N350VS		1	NVSLPTTK	NVSLPTTK[462]	2	y	1	3	12	GAS3-N350VS	0	FALSE	0	0.99	FALSE	1
487	349.208	12	GAS3-N350VS		1	NVSLPTTK	NVSLPTTK[487]	2	y	1	3	12	GAS3-N350VS	0	FALSE	0	0.99	FALSE	1
512	349.208	12	GAS3-N350VS		1	NVSLPTTK	NVSLPTTK[512]	2	y	1	3	12	GAS3-N350VS	0	FALSE	0	0.99	FALSE	1
537	349.208	12	GAS3-N350VS		1	NVSLPTTK	NVSLPTTK[537]	2	y	1	3	12	GAS3-N350VS	0	FALSE	0	0.99	FALSE	1
562	349.208	12	GAS3-N350VS		1	NVSLPTTK	NVSLPTTK[562]	2	y	1	3	12	GAS3-N350VS	0	FALSE	0	0.99	FALSE	1
587	349.208	12	GAS3-N350VS		1	NVSLPTTK	NVSLPTTK[587]	2	y	1	3	12	GAS3-N350VS	0	FALSE	0	0.99	FALSE	1
612	349.208	12	GAS3-N350VS		1	NVSLPTTK	NVSLPTTK[612]	2	y	1	3	12	GAS3-N350VS	0	FALSE	0	0.99	FALSE	1
637	349.208	12	GAS3-N350VS		1	NVSLPTTK	NVSLPTTK[637]	2	y	1	3	12	GAS3-N350VS	0	FALSE	0	0.99	FALSE	1
662	349.208	12	GAS3-N350VS		1	NVSLPTTK	NVSLPTTK[662]	2	y	1	3	12	GAS3-N350VS	0	FALSE	0	0.99	FALSE	1
687	349.208	12	GAS3-N350VS		1	NVSLPTTK	NVSLPTTK[687]	2	y	1	3	12	GAS3-N350VS	0	FALSE	0	0.99	FALSE	1
712	349.208	12	GAS3-N350VS		1	NVSLPTTK	NVSLPTTK[712]	2	y	1	3	12	GAS3-N350VS	0	FALSE	0	0.99	FALSE	1
737	349.208	12	GAS3-N350VS		1	NVSLPTTK	NVSLPTTK[737]	2	y	1	3	12	GAS3-N350VS	0	FALSE	0	0.99	FALSE	1
762	349.208	12	GAS3-N350VS		1	NVSLPTTK	NVSLPTTK[762]	2	y	1	3	12	GAS3-N350VS	0	FALSE	0	0.99	FALSE	1
787	349.208	12	GAS3-N350VS		1	NVSLPTTK	NVSLPTTK[787]	2	y	1	3	12	GAS3-N350VS	0	FALSE	0	0.99	FALSE	1
812	349.208	12	GAS3-N350VS		1	NVSLPTTK	NVSLPTTK[812]	2	y	1	3	12	GAS3-N350VS	0	FALSE	0	0.99	FALSE	1
837	349.208	12	GAS3-N350VS		1	NVSLPTTK	NVSLPTTK[837]	2	y	1	3	12	GAS3-N350VS	0	FALSE	0	0.99	FALSE	1
862	349.208	12	GAS3-N350VS		1	NVSLPTTK	NVSLPTTK[862]	2	y	1	3	12	GAS3-N350VS	0	FALSE	0	0.99	FALSE	1
887	349.208	12	GAS3-N350VS		1	NVSLPTTK	NVSLPTTK[887]	2	y	1	3	12	GAS3-N350VS	0	FALSE	0	0.99	FALSE	1
912	349.208	12	GAS3-N350VS		1	NVSLPTTK	NVSLPTTK[912]	2	y	1	3	12	GAS3-N350VS	0	FALSE	0	0.99	FALSE	1
937	349.208	12	GAS3-N350VS		1	NVSLPTTK	NVSLPTTK[937]	2	y	1	3	12	GAS3-N350VS	0	FALSE	0	0.99	FALSE	1
962	349.208	12	GAS3-N350VS		1	NVSLPTTK	NVSLPTTK[962]	2	y	1	3	12	GAS3-N350VS	0	FALSE	0	0.99	FALSE	1
987	349.208	12	GAS3-N350VS		1	NVSLPTTK	NVSLPTTK[987]	2	y	1	3	12	GAS3-N350VS	0	FALSE	0	0.99	FALSE	1
1012	349.208	12	GAS3-N350VS		1	NVSLPTTK	NVSLPTTK[1012]	2	y	1	3	12	GAS3-N350VS	0	FALSE	0	0.99	FALSE	1
1037	349.208	12	GAS3-N350VS		1	NVSLPTTK	NVSLPTTK[1037]	2	y	1	3	12	GAS3-N350VS	0	FALSE	0	0.99	FALSE	1
1062	349.208	12	GAS3-N350VS		1	NVSLPTTK	NVSLPTTK[1062]	2	y	1	3	12	GAS3-N350VS	0	FALSE	0	0.99	FALSE	1
1087	349.208	12	GAS3-N350VS		1	NVSLPTTK	NVSLPTTK[1087]	2	y	1	3	12	GAS3-N350VS	0	FALSE	0	0.99	FALSE	1
1112	349.208	12	GAS3-N350VS		1	NVSLPTTK	NVSLPTTK[1112]	2	y	1	3	12	GAS3-N350VS	0	FALSE	0	0.99	FALSE	1
1137	349.208	12	GAS3-N350VS		1	NVSLPTTK	NVSLPTTK[1137]	2	y	1	3	12	GAS3-N350VS	0	FALSE	0	0.99	FALSE	1
1162	349.208	12	GAS3-N350VS		1	NVSLPTTK	NVSLPTTK[1162]	2	y	1	3	12	GAS3-N350VS	0	FALSE	0	0.99	FALSE	1
1187	349.208	12	GAS3-N350VS		1	NVSLPTTK	NVSLPTTK[1187]	2	y	1	3	12	GAS3-N350VS	0	FALSE	0	0.99	FALSE	1
1212	349.208	12	GAS3-N350VS		1	NVSLPTTK	NVSLPTTK[1212]	2	y	1	3	12	GAS3-N350VS	0	FALSE	0	0.99	FALSE	1
1237	349.208	12	GAS3-N350VS		1	NVSLPTTK	NVSLPTTK[1237]	2	y	1	3	12	GAS3-N350VS	0	FALSE	0	0.99	FALSE	1
412.5	151.079	12	GAS3-N350VS		1	NVSLPTTK	NVSLPTTK[412]	2	b	2	3	12	GAS3-N350VS	0	FALSE	0	0.99	FALSE	1
437	151.079	12	GAS3-N350VS		1	NVSLPTTK	NVSLPTTK[437]	2	b	2	3	12	GAS3-N350VS	0	FALSE	0	0.99	FALSE	1
462	151.079	12	GAS3-N350VS		1	NVSLPTTK	NVSLPTTK[462]	2	b	2	3	12	GAS3-N350VS	0	FALSE	0	0.99	FALSE	1
487	151.079	12	GAS3-N350VS		1	NVSLPTTK	NVSLPTTK[487]	2	b	2	3	12	GAS3-N350VS	0	FALSE	0	0.99	FALSE	1
512	151.079	12	GAS3-N350VS		1	NVSLPTTK	NVSLPTTK[512]	2	b	2	3	12	GAS3-N350VS	0	FALSE	0	0.99	FALSE	1
537	151.079	12	GAS3-N350VS		1	NVSLPTTK	NVSLPTTK[537]	2	b	2	3	12	GAS3-N350VS	0	FALSE	0	0.99	FALSE	1
562	151.079	12	GAS3-N350VS		1	NVSLPTTK	NVSLPTTK[562]	2	b	2	3	12	GAS3-N350VS	0	FALSE	0	0.99	FALSE	1
587	151.079	12	GAS3-N350VS		1	NVSLPTTK	NVSLPTTK[587]	2	b	2	3	12	GAS3-N350VS	0	FALSE	0	0.99	FALSE	1
612	151.079	12	GAS3-N350VS		1	NVSLPTTK	NVSLPTTK[612]	2	b	2	3	12	GAS3-N350VS	0	FALSE	0	0.99	FALSE	1
637	151.079	12	GAS3-N350VS		1	NVSLPTTK	NVSLPTTK[637]	2	b	2	3	12	GAS3-N350VS	0	FALSE	0	0.99	FALSE	1
662	151.079	12	GAS3-N350VS		1	NVSLPTTK	NVSLPTTK[662]	2	b	2	3	12	GAS3-N350VS	0	FALSE	0	0.99	FALSE	1
687	151.079	12	GAS3-N350VS		1	NVSLPTTK	NVSLPTTK[687]	2	b	2	3	12	GAS3-N350VS	0	FALSE	0	0.99	FALSE	1
712	151.079	12	GAS3-N350VS		1	NVSLPTTK	NVSLPTTK[712]	2	b	2	3	12	GAS3-N350VS	0	FALSE	0	0.99	FALSE	1
737	151.079	12	GAS3-N350VS		1	NVSLPTTK	NVSLPTTK[737]	2	b	2	3	12	GAS3-N350VS	0	FALSE	0	0.99	FALSE	1
762	151.079	12	GAS3-N350VS		1	NVSLPTTK	NVSLPTTK[762]	2	b	2	3	12	GAS3-N350VS	0	FALSE	0	0.99	FALSE	1
787	151.079	12	GAS3-N350VS		1	NVSLPTTK	NVSLPTTK[787]	2	b	2	3	12	GAS3-N350VS	0	FALSE	0	0.99	FALSE	1
812	151.079	12	GAS3-N350VS		1	NVSLPTTK	NVSLPTTK[812]	2	b	2	3	12	GAS3-N350VS	0	FALSE	0	0.99	FALSE	1
837	151.079	12	GAS3-N350VS		1	NVSLPTTK	NVSLPTTK[837]	2	b	2	3	12	GAS3-N350VS	0	FALSE	0	0.99	FALSE	1
862	151.079	12	GAS3-N350VS		1	NVSLPTTK	NVSLPTTK[862]	2	b	2	3	12	GAS3-N350VS	0	FALSE	0	0.99	FALSE	1
887	151.079	12	GAS3-N350VS		1	NVSLPTTK	NVSLPTTK[887]	2	b	2	3	12	GAS3-N350VS	0	FALSE	0	0.99	FALSE	1
912	151.079	12	GAS3-N350VS		1	NVSLPTTK	NVSLPTTK[912]	2	b	2	3	12	GAS3-N350VS	0	FALSE	0	0.99	FALSE	1
937	151.079	12	GAS3-N350VS		1	NVSLPTTK	NVSLPTTK[937]	2	b	2	3	12	GAS3-N350VS	0	FALSE	0	0.99	FALSE	1
962	151.079	12	GAS3-N350VS		1	NVSLPTTK	NVSLPTTK[962]	2	b	2	3	12	GAS3-N350VS	0	FALSE	0	0.99	FALSE	1
987	151.079	12	GAS3-N350VS		1	NVSLPTTK	NVSLPTTK[987]	2	b	2	3	12	GAS3-N350VS	0	FALSE	0	0.99	FALSE	1
1012	151.079	12	GAS3-N350VS		1	NVSLPTTK	NVSLPTTK[1012]	2	b	2	3	12	GAS3-N350VS	0	FALSE	0	0.99	FALSE	1
1037	151.079	12	GAS3-N350VS		1	NVSLPTTK	NVSLPTTK[1037]	2	b	2	3	12	GAS3-N350VS	0	FALSE	0	0.99	FALSE	1
1062	151.079	12	GAS3-N350VS		1	NVSLPTTK	NVSLPTTK[1062]	2	b	2	3	12	GAS3-N350VS	0	FALSE	0	0.99	FALSE	1
1087	151.079	12	GAS3-N350VS		1	NVSLPTTK	NVSLPTTK[1087]	2	b	2	3	12	GAS3-N350VS	0	FALSE	0	0.99	FALSE	1
1112	151.079	12	GAS3-N350VS		1	NVSLPTTK	NVSLPTTK[1112]	2	b	2	3	12	GAS3-N350VS	0	FALSE	0	0.99	FALSE	1
1137	151.079	12	GAS3-N350VS		1	NVSLPTTK	NVSLPTTK[1137]	2	b	2	3	12	GAS3-N350VS	0	FALSE	0	0.99	FALSE	1
1162	151.079	12	GAS3-N350VS		1	NVSLPTTK	NVSLPTTK[1162]	2	b	2	3	12	GAS3-N350VS	0	FALSE	0	0.99	FALSE	1
1187	151.079	12	GAS3-N350VS		1	NVSLPTTK	NVSLPTTK[1187]	2	b	2	3	12	GAS3-N350VS	0	FALSE	0	0.99	FALSE	1
1212	151.079	12	GAS3-N350VS		1	NVSLPTTK	NVSLPTTK[1212]	2	b	2	3	12	GAS3-N350VS	0	FALSE	0	0.99	FALSE	1
1237	151.079	12	GAS3-N350VS		1	NVSLPTTK	NVSLPTTK[1237]	2	b	2	3	12	GAS3-N350VS	0	FALSE	0	0.99	FALSE	1
412.5	175.108	12	GAS3-N350VS		1	NVSLPTTK	NVSLPTTK[412]	2	y	2	3	12	GAS3-N350VS	0	FALSE	0	0.99	FALSE	1
437	175.108	12	GAS3-N350VS		1	NVSLPTTK	NVSLPTTK[437]	2	y	2	3	12	GAS3-N350VS	0	FALSE	0	0.99	FALSE	1
462	175.108	12	GAS3-N350VS		1	NVSLPTTK	NVSLPTTK[462]	2	y	2	3	12	GAS3-N350VS	0	FALSE	0	0.99	FALSE	1
487	175.108	12	GAS3-N350VS		1	NVSLPTTK	NVSLPTTK[487]	2	y	2	3	12	GAS3-N350VS	0	FALSE	0	0.99	FALSE	1
512	175.108	12	GAS3-N350VS		1	NVSLPTTK	NVSLPTTK[512]	2	y	2	3	12	GAS3-N350VS	0	FALSE	0	0.99	FALSE	1
537	175.108	12	GAS3-N350VS		1	NVSLPTTK	NVSLPTTK[537]	2	y	2	3	12	GAS3-N350VS	0	FALSE	0	0.99	FALSE	1
562	175.108	12	GAS3-N350VS		1	NVSLPTTK	NVSLPTTK[562]	2	y	2	3	12	GAS3-N350VS	0	FALSE	0	0.99	FALSE	1
587	175.108	12	GAS3-N350VS		1	NVSLPTTK	NVSLPTTK[587]	2	y	2	3	12	GAS3-N350VS	0	FALSE	0	0.99	FALSE	1
612	175.108	12	GAS3-N350VS		1	NVSLPTTK	NVSLPTTK[612]	2	y	2	3	12	GAS3-N350VS	0	FALSE	0	0.99	FALSE	1
637	175.108	12	GAS3-N350VS		1	NVSLPTTK	NVSLPTTK[637]	2	y	2	3	12	GAS3-N350VS	0	FALSE	0	0.99	FALSE	1
662	175.108	12	GAS3-N350VS		1	NVSLPTTK	NVSLPTTK[662]	2	y	2	3	12	GAS3-N350VS	0	FALSE	0	0.99	FALSE	1
687	175.108	12	GAS3-N350VS		1	NVSLPTTK	NVSLPTTK[687]	2	y	2	3	12	GAS3-N350VS	0	FALSE	0	0.99	FALSE	1
712	175.108	12	GAS3-N350VS		1	NVSLPTTK	NVSLPTTK[712]	2	y	2	3	12	GAS3-N350VS	0	FALSE	0	0.99	FALSE	1
737	175.108	12	GAS3-N350VS		1	NVSLPTTK	NVSLPTTK[737]	2	y	2	3	12	GAS3-N350VS	0	FALSE	0	0.99	FALSE	1
762	175.108	12	GAS3-N350VS		1	NVSLPTTK	NVSLPTTK[762]	2	y	2	3	12	GAS3-N350VS	0	FALSE	0	0.99	FALSE	1
787	175.108	12	GAS3-N350VS		1	NVSLPTTK	NVSLPTTK[787]	2	y	2	3	12	GAS3-N350VS	0	FALSE	0	0.99	FALSE	1
812	175.108	12	GAS3-N350VS		1	NVSLPTTK	NVSLPTTK[812]	2	y	2	3	12	GAS3-N350VS	0	FALSE	0	0.99	FALSE	1
837	175.108	12	GAS3-N350VS		1	NVSLPTTK	NVSLPTTK[837]	2	y	2	3	12	GAS3-N350VS	0	FALSE	0	0.99	FALSE	1
862	175.108	12	GAS3-N350VS		1	NVSLPTTK	NVSLPTTK[862]	2	y	2	3	12	GAS3-N350VS	0	FALSE	0	0.99	FALSE	1
887	175.108	12	GAS3-N350VS		1	NVSLPTTK	NVSLPTTK[887]	2	y	2	3	12	GAS3-N350VS	0	FALSE	0	0.99	FALSE	1
912	175.108	12	GAS3-N350VS		1	NVSLPTTK	NVSLPTTK[912]	2	y	2	3	12	GAS3-N350VS	0	FALSE	0	0.99	FALSE	1
937	175.108	12	GAS3-N350VS		1	NVSLPTTK	NVSLPTTK[937]	2	y	2	3	12	GAS3-N350VS	0	FALSE	0	0.99	FALSE	1
962	175.108	12	GAS3-N350VS		1	NVSLPTTK	NVSLPTTK[962]	2	y	2	3	12	GAS3-N350VS	0	FALSE	0	0.99	FALSE	1
987	175.108	12	GAS3-N350VS		1	NVSLPTTK	NVSLPTTK[987]	2	y	2	3	12	GAS3-N350VS	0	FALSE	0	0.99	FALSE	1
1012	175.108	12	GAS3-N350VS		1	NVSLPTTK	NVSLPTTK[1012]	2	y	2	3	12	GAS3-N350VS	0	FALSE	0	0.99	FALSE	1
1037	175.108	12	GAS3-N350VS		1	NVSLPTTK	NVSLPTTK[1037]	2	y	2	3	12	GAS3-N350VS	0	FALSE	0	0.99	FALSE	1
1062	175.108	12	GAS3-N350VS		1	NVSLPTTK	NVSLPTTK[1062]	2	y	2	3	12	GAS3-N350VS	0	FALSE	0	0.99	FALSE	1
1087	175.108	12	GAS3-N350VS		1	NVSLPTTK	NVSLPTTK[1087]	2	y	2	3	12	GAS3-N350VS	0	FALSE	0	0.99	FALSE	1
1112	175.108	12	GAS3-N350VS		1	NVSLPTTK	NVSLPTTK[1112]	2	y	2	3	12	GAS3-N350VS	0	FALSE	0	0.99	FALSE	1
1137	175.108	12	GAS3-N350VS		1	NVSLPTTK	NVSLPTTK[1137]	2	y	2	3	12	GAS3-N350VS	0	FALSE	0	0.99	FALSE	1
1162	175.108	12	GAS3-N350VS		1	NVSLPTTK	NVSLPTTK[1162]	2	y	2	3	12	GAS3-N350VS	0	FALSE	0	0.99	FALSE	1
1187	175.108	12	GAS3-N350VS		1	NVSLPTTK	NVSLPTTK[1187]	2	y	2	3	12	GAS3-N350VS	0	FALSE	0	0.99	FALSE	1
1212	175.108	12	GAS3-N350VS		1	NVSLPTTK	NVSLPTTK[1212]	2	y	2	3	12	GAS3-N350VS	0	FALSE	0	0.99	FALSE	1
1237	175.108	12	GAS3-N350VS		1	NVSLPTTK	NVSLPTTK[1237]	2	y	2	3	12	GAS3-N350VS	0	FALSE	0	0.99	FALSE	1
412.5	414.235	12	GAS3-N350VS		1	NVSLPTTK	NVSLPTTK[412]	2	b	1	4	12	GAS3-N350VS	0	FALSE	0	0.99	FALSE	1
437	414.235	12	GAS3-N350VS		1	NVSLPTTK	NVSLPTTK[437]	2	b	1	4	12	GAS3-N350VS	0	FALSE	0	0.99	FALSE	1
462	414.235	12	GAS3-N350VS		1	NVSLPTTK	NVSLPTTK[462]	2	b	1	4	12	GAS3-N350VS	0	FALSE	0	0.99	FALSE	1
487	414.235	12	GAS3-N350VS		1	NVSLPTTK	NVSLPTTK[487]	2	b	1	4	12	GAS3-N350VS	0	FALSE	0	0.99	FALSE	1
512	414.235	12	GAS3-N350VS		1	NVSLPTTK	NVSLPTTK[512]	2	b	1	4	12	GAS3-N350VS	0	FALSE	0	0.99	FALSE	1
537	414.235	12	GAS3-N350VS		1	NVSLPTTK	NVSLPTTK[537]	2	b	1	4	12	GAS3-N350VS	0	FALSE	0	0.99	FALSE	1
562	414.235	12	GAS3-N350VS		1	NVSLPTTK	NVSLPTTK[562]	2	b	1	4	12	GAS3-N350VS	0	FALSE	0	0.99	FALSE	1
587	414.235	12	GAS3-N350VS		1	NVSLPTTK	NVSLPTTK[587]	2	b	1	4	12	GAS3-N350VS	0	FALSE	0	0.99	FALSE	1
612	414.235	12	GAS3-N350VS		1	NVSLPTTK	NVSLPTTK[612]	2	b	1	4	12	GAS3-N350VS	0	FALSE	0	0.99	FALSE	1
637	414.235	12	GAS3-N350VS		1	NVSLPTTK	NVSLPTTK[637]	2	b	1	4	12	GAS3-N350VS	0	FALSE	0	0.99	FALSE	1
662	414.235	12	GAS3-N350VS		1	NVSLPTTK	NVSLPTTK[662]	2	b	1	4	12	GAS3-N350VS	0	FALSE	0	0.99	FALSE	1
687	414.235	12	GAS3-N350VS		1	NVSLPTTK	NVSLPTTK[687]	2	b	1	4	12	GAS3-N350VS	0	FALSE	0	0.99	FALSE	1
712	414.235	12	GAS3-N350VS		1	NVSLPTTK	NVSLPTTK[712]	2	b	1	4	12	GAS3-N350VS	0	FALSE	0	0.99	FALSE	1
737	414.235	12	GAS3-N350VS		1	NVSLPTTK	NVSLPTTK[737]	2	b	1	4	12	GAS3-N350VS	0	FALSE	0	0.99	FALSE	1
762	414.235	12	GAS3-N350VS		1	NVSLPTTK	NVSLPTTK[762]	2	b	1	4	12	GAS3-N350VS	0	FALSE	0	0.99	FALSE	1
787	414.235	12	GAS3-N350VS		1	NVSLPTTK	NVSLPTTK[787]	2	b	1	4	12	GAS3-N350VS	0	FALSE	0	0.99	FALSE	1
812	414.235	12	GAS3-N350VS		1	NVSLPTTK	NVSLPTTK[812]	2	b	1	4	12	GAS3-N350VS	0	FALSE	0	0.99	FALSE	1
837	414.235	12	GAS3-N350VS		1	NVSLPTTK	NVSLPTTK[837]	2	b	1	4	12	GAS3-N350VS	0	FALSE	0	0.99	FALSE	1
862	414.235	12	GAS3-N350VS		1	NVSLPTTK	NVSLPTTK[862]	2	b	1	4	12	GAS3-N350VS	0	FALSE	0	0.99	FALSE	1
887	414.235	12	GAS3-N350VS		1	NVSLPTTK	NVSLPTTK[887]	2	b	1	4	12	GAS3-N350VS	0	FALSE	0	0.99	FALSE	1
912	414.235	12	GAS3-N350VS		1	NVSLPTTK	NVSLPTTK[912]	2	b	1	4	12	GAS3-N350VS	0	FALSE	0	0.99	FALSE	1
937	414.235	12	GAS3-N350VS		1	NVSLPTTK	NVSLPTTK[937]	2	b	1	4	12	GAS3-N350VS	0	FALSE	0	0.99	FALSE	1
962	414.235	12	GAS3-N350VS		1	NVSLPTTK	NVSLPTTK[962]	2	b	1	4	12	GAS3-N350VS	0	FALSE	0	0.99	FALSE	1
987	414.235	12	GAS3-N350VS		1	NVSLPTTK	NVSLPTTK[987]	2	b	1	4	12	GAS3-N350VS	0	FALSE	0	0.99	FALSE	1
1012	414.235	12	GAS3-N350VS		1	NVSLPTTK	NVSLPTTK[1012]	2	b	1	4	12	GAS3-N350VS	0	FALSE	0	0.99	FALSE	1
1037	414.235	12	GAS3-N350VS		1	NVSLPTTK	NVSLPTTK[1037]	2	b	1	4	12	GAS3-N350VS	0	FALSE	0	0.99	FALSE	1
1062	414.235	12	GAS3-N350VS		1	NVSLPTTK	NVSLPTTK[1062]	2	b	1	4	12	GAS3-N350VS	0	FALSE	0	0.99	FALSE	1
1087	414.235	12	GAS3-N350VS		1	NVSLPTTK	NVSLPTTK[1087]	2	b	1	4	12	GAS3-N350VS	0	FALSE	0	0.99	FALSE	1
1112	414.235	12	GAS3-N350VS		1	NVSLPTTK	NVSLPTTK[1112]	2	b	1	4	12	GAS3-N350VS	0	FALSE	0	0.99	FALSE	1
1137	414.235	12	GAS3-N350VS		1	NVSLPTTK	NVSLPTTK[1137]	2	b	1	4	12	GAS3-N350VS	0	FALSE	0	0.99	FALSE	1
1162	414.235	12	GAS3-N350VS		1	NVSLPTTK	NVSLPTTK[1162]	2	b	1	4	12	GAS3-N350VS	0	FALSE	0	0.99	FALSE	1
1187	414.235	12	GAS3-N350VS		1	NVSLPTTK	NVSLPTTK[1187]	2	b	1	4	12	GAS3-N350VS	0	FALSE	0	0.99	FALSE	1
1212	414.235	12	GAS3-N350VS		1	NVSLPTTK	NVSLPTTK[1212]	2	b	1	4	12	GAS3-N350VS	0	FALSE	0	0.99	FALSE	1
1237	414.235	12	GAS3-N350VS		1	NVSLPTTK	NVSLPTTK[1237]	2	b	1	4	12	GAS3-N350VS	0	FALSE	0	0.99	FALSE	1
412.5	446.261	12	GAS3-N350VS		1	NVSLPTTK	NVSLPTTK[412]	2	y	1	4	12	GAS3-N350VS	0	FALSE	0	0.99	FALSE	1
437	446.261	12	GAS3-N350VS		1	NVSLPTTK	NVSLPTTK[437]	2	y	1	4	12	GAS3-N350VS	0	FALSE	0	0.99	FALSE	1
462	446.261	12	GAS3-N350VS		1	NVSLPTTK	NVSLPTTK[462]	2	y	1	4	12	GAS3-N350VS	0	FALSE	0	0.99	FALSE	1
487	446.261	12	GAS3-N350VS		1	NVSLPTTK	NVSLPTTK[487]	2	y	1	4	12	GAS3-N350VS	0	FALSE	0	0.99	FALSE	1
512	446.261	12	GAS3-N350VS		1	NVSLPTTK	NVSLPTTK[512]	2	y	1	4	12	GAS3-N350VS	0	FALSE	0	0.99	FALSE	1
537	446.261	12	GAS3-N350VS		1	NVSLPTTK	NVSLPTTK[537]	2	y	1	4	12	GAS3-N350VS	0	FALSE	0	0.99	FALSE	1
562	446.261	12	GAS3-N350VS		1	NVSLPTTK	NVSLPTTK[562]	2	y	1	4	12	GAS3-N350VS	0	FALSE	0	0.99	FALSE	1
587	446.261	12	GAS3-N350VS		1	NVSLPTTK	NVSLPTTK[587]	2	y	1	4	12	GAS3-N350VS	0	FALSE	0	0.99	FALSE	1
612	446.261	12	GAS3-N350VS		1	NVSLPTTK	NVSLPTTK[612]	2	y	1	4	12	GAS3-N350VS	0	FALSE	0	0.99	FALSE	1
637	446.261	12	GAS3-N350VS		1	NVSLPTTK	NVSLPTTK[637]	2	y	1	4	12	GAS3-N350VS	0	FALSE	0	0.99	FALSE	1
662	446.261	12	GAS3-N350VS		1	NVSLPTTK	NVSLPTTK[662]	2	y	1	4	12	GAS3-N350VS	0	FALSE	0	0.99	FALSE	1
687	446.261	12	GAS3-N350VS		1	NVSLPTTK	NVSLPTTK[687]	2	y	1	4	12	GAS3-N350VS	0	FALSE	0	0.99	FALSE	1
712	446.261	12	GAS3-N350VS		1	NVSLPTTK	NVSLPTTK[712]	2	y	1	4	12	GAS3-N350VS	0	FALSE	0	0.99	FALSE	1
737	446.261	12	GAS3-N350VS		1	NVSLPTTK	NVSLPTTK[737]	2	y	1	4	12	GAS3-N350VS	0	FALSE	0	0.99	FALSE	1
762	446.261	12	GAS3-N350VS		1	NVSLPTTK	NVSLPTTK[762]	2	y	1	4	12	GAS3-N350VS	0	FALSE	0	0.99	FALSE	1
787	446.261	12	GAS3-N350VS		1	NVSLPTTK	NVSLPTTK[787]	2	y	1	4	12	GAS3-N350VS	0	FALSE	0	0.99	FALSE	1
812	446.261	12	GAS3-N350VS		1	NVSLPTTK	NVSLPTTK[812]	2	y	1	4	12	GAS3-N350VS	0	FALSE	0	0.99	FALSE	1
837	446.261	12	GAS3-N350VS		1	NVSLPTTK	NVSLPTTK[837]	2	y	1	4	12	GAS3-N350VS	0	FALSE	0	0.99	FALSE	1
862	446.261	12	GAS3-N350VS		1	NVSLPTTK	NVSLPTTK[862]	2	y	1	4	12	GAS3-N350VS	0	FALSE	0	0.99	FALSE	1
887	446.261	12	GAS3-N350VS		1	NVSLPTTK	NVSLPTTK[887]	2	y	1	4	12	GAS3-N350VS	0	FALSE	0	0.99	FALSE	1
912	446.261	12	GAS3-N350VS		1	NVSLPTTK	NVSLPTTK[912]	2	y	1	4	12	GAS3-N350VS	0	FALSE	0	0.99	FALSE	1
937	446.261	12	GAS3-N350VS		1	NVSLPTTK	NVSLPTTK[937]	2	y	1	4	12	GAS3-N350VS	0	FALSE	0	0.99	FALSE	1
962	446.261	12	GAS3-N350VS		1	NVSLPTTK	NVSLPTTK[962]	2	y	1	4	12	GAS3-N350VS	0	FALSE	0	0.99	FALSE	1
987	446.261	12	GAS3-N350VS		1	NVSLPTTK	NVSLPTTK[987]	2	y	1	4	12	GAS3-N350VS	0	FALSE	0	0.99	FALSE	1
1012	446.261	12	GAS3-N350VS		1	NVSLPTTK	NVSLPTTK[1012]	2	y	1	4	12	GAS3-N350VS	0	FALSE	0	0.99	FALSE	1
1037	446.261	12	GAS3-N350VS		1	NVSLPTTK	NVSLPTTK[1037]	2	y	1	4	12	GAS3-N350VS	0	FALSE	0	0.99	FALSE	1
1062	446.261	12	GAS3-N350VS		1	NVSLPTTK	NVSLPTTK[1062]	2	y	1	4	12	GAS3-N350VS	0	FALSE	0	0.99	FALSE	1
1087	446.261	12	GAS3-N350VS		1	NVSLPTTK	NVSLPTTK[1087]	2	y	1	4	12	GAS3-N350VS	0	FALSE	0	0.99	FALSE	1
1112	446.261	12	GAS3-N350VS		1	NVSLPTTK	NVSLPTTK[1112]	2	y	1	4	12	GAS3-N350VS	0	FALSE	0	0.99	FALSE	1
1137	446.261	12	GAS3-N350VS		1	NVSLPTTK	NVSLPTTK[1137]	2	y	1	4	12	GAS3-N350VS	0	FALSE	0	0.99	FALSE	1
1162	446.261	12	GAS3-N350VS		1	NVSLPTTK	NVSLPTTK[1162]	2	y	1	4	12	GAS3-N350VS	0	FALSE	0	0.99	FALSE	1
1187	446.261	12	GAS3-N350VS		1	NVSLPTTK	NVSLPTTK[1187]	2	y	1	4	12	GAS3-N350VS	0	FALSE	0	0.99	FALSE	1
1212	446.261	12	GAS3-N350VS		1	NVSLPTTK	NVSLPTTK[1212]	2	y	1	4	12	GAS3-N350VS	0	FALSE	0	0.99	FALSE	1
1237	446.261	12	GAS3-N350VS		1	NVSLPTTK	NVSLPTTK[1237]	2	y	1	4	12	GAS3-N350VS	0	FALSE	0	0.99	FALSE	1
412.5	207.621	12	GAS3-N350VS		1	NVSLPTTK	NVSLPTTK[412]	2	b	2	4	12	GAS3-N350VS	0	FALSE	0	0.99	FALSE	1
437	207.621	12	GAS3-N350VS		1	NVSLPTTK	NVSLPTTK[437]	2	b	2	4	12	GAS3-N350VS	0	FALSE	0	0.99	FALSE	1
462	207.621	12	GAS3-N350VS		1	NVSLPTTK	NVSLPTTK[462]	2	b	2	4	12	GAS3-N350VS	0	FALSE	0	0.99	FALSE	1
487	207.621	12	GAS3-N350VS		1	NVSLPTTK	NVSLPTTK[487]	2	b	2	4	12	GAS3-N350VS	0	FALSE	0	0.99	FALSE	1
512	207.621	12	GAS3-N350VS		1	NVSLPTTK	NVSLPTTK[512]	2	b	2	4	12	GAS3-N350VS	0	FALSE	0	0.99	FALSE	1
537	207.621	12	GAS3-N350VS		1	NVSLPTTK	NVSLPTTK[537]	2	b	2	4	12	GAS3-N350VS	0	FALSE	0	0.99	FALSE	1
562	207.621	12	GAS3-N350VS		1	NVSLPTTK	NVSLPTTK[562]	2	b	2	4	12	GAS3-N350VS	0	FALSE	0	0.99	FALSE	1
587	207.621	12	GAS3-N350VS		1	NVSLPTTK	NVSLPTTK[587]	2	b	2	4	12	GAS3-N350VS	0	FALSE	0	0.99	FALSE	1
612	207.621	12	GAS3-N350VS		1	NVSLPTTK	NVSLPTTK[612]	2	b	2	4	12	GAS3-N350VS	0	FALSE	0	0.99	FALSE	1
637	207.621	12	GAS3-N350VS		1	NVSLPTTK	NVSLPTTK[637]	2	b	2	4	12	GAS3-N350VS	0	FALSE	0	0.99	FALSE	1
662	207.621	12	GAS3-N350VS		1	NVSLPTTK	NVSLPTTK[662]	2	b	2	4	12	GAS3-N350VS	0	FALSE	0	0.99	FALSE	1
687	207.621	12	GAS3-N350VS		1	NVSLPTTK	NVSLPTTK[687]	2	b	2	4	12	GAS3-N350VS	0	FALSE	0	0.99	FALSE	1
712	207.621	12	GAS3-N350VS		1	NVSLPTTK	NVSLPTTK[712]	2	b	2	4	12	GAS3-N350VS	0	FALSE	0	0.99	FALSE	1
737	207.621	12	GAS3-N350VS		1	NVSLPTTK	NVSLPTTK[737]	2	b	2	4	12	GAS3-N350VS	0	FALSE	0	0.99	FALSE	1
762	207.621	12	GAS3-N350VS		1	NVSLPTTK	NVSLPTTK[762]	2	b	2	4	12	GAS3-N350VS	0	FALSE	0	0.99	FALSE	1
787	207.621	12	GAS3-N350VS		1	NVSLPTTK	NVSLPTTK[787]	2	b	2	4	12	GAS3-N350VS	0	FALSE	0	0.99	FALSE	1
812	207.621	12	GAS3-N350VS		1	NVSLPTTK	NVSLPTTK[812]	2	b	2	4	12	GAS3-N350VS	0	FALSE	0	0.99	FALSE	1
837	207.621	12	GAS3-N350VS		1	NVSLPTTK	NVSLPTTK[837]	2	b	2	4	12	GAS3-N350VS	0	FALSE	0	0.99	FALSE	1
862	207.621	12	GAS3-N350VS		1	NVSLPTTK	NVSLPTTK[862]	2	b	2	4	12	GAS3-N350VS	0	FALSE	0	0.99	FALSE	1
887	207.621	12	GAS3-N350VS		1	NVSLPTTK	NVSLPTTK[887]	2	b	2	4	12	GAS3-N350VS	0	FALSE	0	0.99	FALSE	1
912	207.621	12	GAS3-N350VS		1	NVSLPTTK	NVSLPTTK[912]	2	b	2	4	12	GAS3-N350VS	0	FALSE	0	0.99	FALSE	1
937	207.621	12	GAS3-N350VS		1	NVSLPTTK	NVSLPTTK[937]	2	b	2	4	12	GAS3-N350VS	0	FALSE	0	0.99	FALSE	1
962	207.621	12	GAS3-N350VS		1	NVSLPTTK	NVSLPTTK[962]	2	b	2	4	12	GAS3-N350VS	0	FALSE	0	0.99	FALSE	1
987	207.621	12	GAS3-N350VS		1	NVSLPTTK	NVSLPTTK[987]	2	b	2	4	12	GAS3-N350VS	0	FALSE	0	0.99	FALSE	1
1012	207.621	12	GAS3-N350VS		1	NVSLPTTK	NVSLPTTK[1012]	2	b	2	4	12	GAS3-N350VS	0	FALSE	0	0.99	FALSE	1
1037	207.621	12	GAS3-N350VS		1	NVSLPTTK	NVSLPTTK[1037]	2	b	2	4	12	GAS3-N350VS	0	FALSE	0	0.99	FALSE	1
1062	207.621	12	GAS3-N350VS		1	NVSLPTTK	NVSLPTTK[1062]	2	b	2	4	12	GAS3-N350VS	0	FALSE	0	0.99	FALSE	1
1087	207.621	12	GAS3-N350VS		1	NVSLPTTK	NVSLPTTK[1087]	2	b	2	4	12	GAS3-N350VS	0	FALSE	0	0.99	FALSE	1
1112	207.621	12	GAS3-N350VS		1	NVSLPTTK	NVSLPTTK[1112]	2	b	2	4	12	GAS3-N350VS	0	FALSE	0	0.99	FALSE	1
1137	207.621	12	GAS3-N350VS		1	NVSLPTTK	NVSLPTTK[1137]	2	b	2	4	12	GAS3-N350VS	0	FALSE	0	0.99	FALSE	1
1162	207.621	12	GAS3-N350VS		1	NVSLPTTK	NVSLPTTK[1162]	2	b	2	4	12	GAS3-N350VS	0	FALSE	0	0.99	FALSE	1
1187	207.621	12	GAS3-N350VS		1	NVSLPTTK	NVSLPTTK[1187]	2	b	2	4	12	GAS3-N350VS	0	FALSE	0	0.99	FALSE	1
1212	207.621	12	GAS3-N350VS		1	NVSLPTTK	NVSLPTTK[1212]	2	b	2	4	12	GAS3-N350VS	0	FALSE	0	0.99	FALSE	1
1237	207.621	12	GAS3-N350VS		1	NVSLPTTK	NVSLPTTK[1237]	2	b	2	4	12	GAS3-N350VS	0	FALSE	0	0.99	FALSE	1
412.5	223.634	12	GAS3-N350VS		1	NVSLPTTK	NVSLPTTK[412]	2	y	2	4	12	GAS3-N350VS	0	FALSE	0	0.99	FALSE	1
437	223.634	12	GAS3-N350VS		1	NVSLPTTK	NVSLPTTK[437]	2	y	2	4	12	GAS3-N350VS	0	FALSE	0	0.99	FALSE	1
462	223.634	12	GAS3-N350VS		1	NVSLPTTK	NVSLPTTK[462]	2	y	2	4	12	GAS3-N350VS	0	FALSE	0	0.99	FALSE	1
487	223.634	12	GAS3-N350VS		1	NVSLPTTK	NVSLPTTK[487]	2	y	2	4	12	GAS3-N350VS	0	FALSE	0	0.99	FALSE	1
512	223.634	12	GAS3-N350VS		1	NVSLPTTK	NVSLPTTK[512]	2	y	2	4	12	GAS3-N350VS	0	FALSE	0	0.99	FALSE	1
537	223.634	12	GAS3-N350VS		1	NVSLPTTK	NVSLPTTK[537]	2	y	2	4	12	GAS3-N350VS	0	FALSE	0	0.99	FALSE	1
562	223.634	12	GAS3-N350VS		1	NVSLPTTK	NVSLPTTK[562]	2	y	2	4	12	GAS3-N350VS	0	FALSE	0	0.99	FALSE	1
587	223.634	12	GAS3-N350VS		1	NVSLPTTK	NVSLPTTK[587]	2	y	2	4	12	GAS3-N350VS	0	FALSE	0	0.99	FALSE	1
612	223.634	12	GAS3-N350VS		1	NVSLPTTK	NVSLPTTK[612]	2	y	2	4	12	GAS3-N350VS	0	FALSE	0	0.99	FALSE	1
637	223.634	12	GAS3-N350VS		1	NVSLPTTK	NVSLPTTK[637]	2	y	2	4	12	GAS3-N350VS	0	FALSE	0	0.99	FALSE	1
662	223.634	12	GAS3-N350VS		1	NVSLPTTK	NVSLPTTK[662]	2	y	2	4	12	GAS3-N350VS	0	FALSE	0	0.99	FALSE	1
687	223.634	12	GAS3-N350VS		1	NVSLPTTK	NVSLPTTK[687]	2	y	2	4	12	GAS3-N350VS	0	FALSE	0	0.99	FALSE	1
712	223.634	12	GAS3-N350VS		1	NVSLPTTK	NVSLPTTK[712]	2	y	2	4	12	GAS3-N350VS	0	FALSE	0	0.99	FALSE	1
737	223.634	12	GAS3-N350VS		1	NVSLPTTK	NVSLPTTK[737]	2	y	2	4	12	GAS3-N350VS	0	FALSE	0	0.99	FALSE	1
762	223.634	12	GAS3-N350VS		1	NVSLPTTK	NVSLPTTK[762]	2	y	2	4	12	GAS3-N350VS	0	FALSE	0	0.99	FALSE	1
787	223.634	12	GAS3-N350VS		1	NVSLPTTK	NVSLPTTK[787]	2	y	2	4	12	GAS3-N350VS	0	FALSE	0	0.99	FALSE	1
812	223.634	12	GAS3-N350VS		1	NVSLPTTK	NVSLPTTK[812]	2	y	2	4	12	GAS3-N350VS	0	FALSE	0	0.99	FALSE	1
837	223.634	12	GAS3-N350VS		1	NVSLPTTK	NVSLPTTK[837]	2	y	2	4	12	GAS3-N350VS	0	FALSE	0	0.99	FALSE	1
862	223.634	12	GAS3-N350VS		1	NVSLPTTK	NVSLPTTK[862]	2	y	2	4	12	GAS3-N350VS	0	FALSE	0	0.99	FALSE	1
887	223.634	12	GAS3-N350VS		1	NVSLPTTK	NVSLPTTK[887]	2	y	2	4	12	GAS3-N350VS	0	FALSE	0	0.99	FALSE	1
912	223.634	12	GAS3-N350VS		1	NVSLPTTK	NVSLPTTK[912]	2	y	2	4	12	GAS3-N350VS	0	FALSE	0	0.99	FALSE	1
937	223.634	12	GAS3-N350VS		1	NVSLPTTK	NVSLPTTK[937]	2	y	2	4	12	GAS3-N350VS	0	FALSE	0	0.99	FALSE	1
962	223.634	12	GAS3-N350VS		1	NVSLPTTK	NVSLPTTK[962]	2	y	2	4	12	GAS3-N350VS	0	FALSE	0	0.99	FALSE	1
987	223.634	12	GAS3-N350VS		1	NVSLPTTK	NVSLPTTK[987]	2	y	2	4	12	GAS3-N350VS	0	FALSE	0	0.99	FALSE	1
1012	223.634	12	GAS3-N350VS		1	NVSLPTTK	NVSLPTTK[1012]	2	y	2	4	12	GAS3-N350VS	0	FALSE	0	0.99	FALSE	1
1037	223.634	12	GAS3-N350VS		1	NVSLPTTK	NVSLPTTK[1037]	2	y	2	4	12	GAS3-N350VS	0	FALSE	0	0.99	FALSE	1
1062	223.634	12	GAS3-N350VS		1	NVSLPTTK	NVSLPTTK[1062]	2	y	2	4	12	GAS3-N350VS	0	FALSE	0	0.99	FALSE	1
1087	223.634	12	GAS3-N350VS		1	NVSLPTTK	NVSLPTTK[1087]	2	y	2	4	12	GAS3-N350VS	0	FALSE	0	0.99	FALSE	1
1112	223.634	12	GAS3-N350VS		1	NVSLPTTK	NVSLPTTK[1112]	2	y	2	4	12	GAS3-N350VS	0	FALSE	0	0.99	FALSE	1
1137	223.634	12	GAS3-N350VS		1	NVSLPTTK	NVSLPTTK[1137]	2	y	2	4	12	GAS3-N350VS	0	FALSE	0	0.99	FALSE	1
1162	223.634	12	GAS3-N350VS		1	NVSLPTTK	NVSLPTTK[1162]	2	y	2	4	12	GAS3-N350VS	0	FALSE	0	0.99	FALSE	1
1187	223.634	12	GAS3-N350VS		1	NVSLPTTK	NVSLPTTK[1187]	2	y	2	4	12	GAS3-N350VS	0	FALSE	0	0.99	FALSE	1
1212	223.634	12	GAS3-N350VS		1	NVSLPTTK	NVSLPTTK[1212]	2	y	2	4	12	GAS3-N350VS	0	FALSE	0	0.99	FALSE	1
1237	223.634	12	GAS3-N350VS		1	NVSLPTTK	NVSLPTTK[1237]	2	y	2	4	12	GAS3-N350VS	0	FALSE	0	0.99	FALSE	1
412.5	511.288	12	GAS3-N350VS		1	NVSLPTTK	NVSLPTTK[412]	2	b	1	5	12	GAS3-N350VS	0	FALSE	0	0.99	FALSE	1
437	511.288	12	GAS3-N350VS		1	NVSLPTTK	NVSLPTTK[437]	2	b	1	5	12	GAS3-N350VS	0	FALSE	0	0.99	FALSE	1
462	511.288	12	GAS3-N350VS		1	NVSLPTTK	NVSLPTTK[462]	2	b	1	5	12	GAS3-N350VS	0	FALSE	0	0.99	FALSE	1
487	511.288	12	GAS3-N350VS		1	NVSLPTTK	NVSLPTTK[487]	2	b	1	5	12	GAS3-N350VS	0	FALSE	0	0.99	FALSE	1
512	511.288	12	GAS3-N350VS		1	NVSLPTTK	NVSLPTTK[512]	2	b	1	5	12	GAS3-N350VS	0	FALSE	0	0.99	FALSE	1
537	511.288	12	GAS3-N350VS		1	NVSLPTTK	NVSLPTTK[537]	2	b	1	5	12	GAS3-N350VS	0	FALSE	0	0.99	FALSE	1
562	511.288	12	GAS3-N350VS		1	NVSLPTTK	NVSLPTTK[562]	2	b	1	5	12	GAS3-N350VS	0	FALSE	0	0.99	FALSE	1
587	511.288	12	GAS3-N350VS		1	NVSLPTTK	NVSLPTTK[587]	2	b	1	5	12	GAS3-N350VS	0	FALSE	0	0.99	FALSE	1
612	511.288	12	GAS3-N350VS		1	NVSLPTTK	NVSLPTTK[612]	2	b	1	5	12	GAS3-N350VS	0	FALSE	0	0.99	FALSE	1
637	511.288	12	GAS3-N350VS		1	NVSLPTTK	NVSLPTTK[637]	2	b	1	5	12	GAS3-N350VS	0	FALSE	0	0.99	FALSE	1
662	511.288	12	GAS3-N350VS		1	NVSLPTTK	NVSLPTTK[662]	2	b	1	5	12	GAS3-N350VS	0	FALSE	0	0.99	FALSE	1
687	511.288	12	GAS3-N350VS		1	NVSLPTTK	NVSLPTTK[687]	2	b	1	5	12	GAS3-N350VS	0	FALSE	0	0.99	FALSE	1
712	511.288	12	GAS3-N350VS		1	NVSLPTTK	NVSLPTTK[712]	2	b	1	5	12	GAS3-N350VS	0	FALSE	0	0.99	FALSE	1
737	511.288	12	GAS3-N350VS		1	NVSLPTTK	NVSLPTTK[737]	2	b	1	5	12	GAS3-N350VS	0	FALSE	0	0.99	FALSE	1
762	511.288	12	GAS3-N350VS		1	NVSLPTTK	NVSLPTTK[762]	2	b	1	5	12	GAS3-N350VS	0	FALSE	0	0.99	FALSE	1
787	511.288	12	GAS3-N350VS		1	NVSLPTTK	NVSLPTTK[787]	2	b	1	5	12	GAS3-N350VS	0	FALSE	0	0.99	FALSE	1
812	511.288	12	GAS3-N350VS		1	NVSLPTTK	NVSLPTTK[812]	2	b	1	5	12	GAS3-N350VS	0	FALSE	0	0.99	FALSE	1
837	511.288	12	GAS3-N350VS		1	NVSLPTTK	NVSLPTTK[837]	2	b	1	5	12	GAS3-N350VS	0	FALSE	0	0.99	FALSE	1
862	511.288	12	GAS3-N350VS		1	NVSLPTTK	NVSLPTTK[862]	2	b	1	5	12	GAS3-N350VS	0	FALSE	0	0.99	FALSE	1
887	511.288	12	GAS3-N350VS		1	NVSLPTTK	NVSLPTTK[887]	2	b	1	5	12	GAS3-N350VS	0	FALSE	0	0.99	FALSE	1
912	511.288	12	GAS3-N350VS		1	NVSLPTTK	NVSLPTTK[912]	2	b	1	5	12	GAS3-N350VS	0	FALSE	0	0.99	FALSE	1
937	511.288	12	GAS3-N350VS		1	NVSLPTTK	NVSLPTTK[937]	2	b	1	5	12	GAS3-N350VS	0	FALSE	0	0.99	FALSE	1
962	511.288	12	GAS3-N350VS		1	NVSLPTTK	NVSLPTTK[962]	2	b	1	5	12	GAS3-N350VS	0	FALSE	0	0.99	FALSE	1
987	511.288	12	GAS3-N350VS		1	NVSLPTTK	NVSLPTTK[987]	2	b	1	5	12	GAS3-N350VS	0	FALSE	0	0.99	FALSE	1
1012	511.288	12	GAS3-N350VS		1	NVSLPTTK	NVSLPTTK[1012]	2	b	1	5	12	GAS3-N350VS	0	FALSE	0	0.99	FALSE	1
1037	511.288	12	GAS3-N350VS		1	NVSLPTTK	NVSLPTTK[1037]	2	b	1	5	12	GAS3-N350VS	0	FALSE	0	0.99	FALSE	1
1062	511.288	12	GAS3-N350VS		1	NVSLPTTK	NVSLPTTK[1062]	2	b	1	5	12	GAS3-N350VS	0	FALSE	0	0.99	FALSE	1
1087	511.288	12	GAS3-N350VS		1	NVSLPTTK	NVSLPTTK[1087]	2	b	1	5	12	GAS3-N350VS	0	FALSE	0	0.99	FALSE	1
1112	511.288	12	GAS3-N350VS		1	NVSLPTTK	NVSLPTTK[1112]	2	b	1	5	12	GAS3-N350VS	0	FALSE	0	0.99	FALSE	1
1137	511.288	12	GAS3-N350VS		1	NVSLPTTK	NVSLPTTK[1137]	2	b	1	5	12	GAS3-N350VS	0	FALSE	0	0.99	FALSE	1
1162	511.288	12	GAS3-N350VS		1	NVSLPTTK	NVSLPTTK[1162]	2	b	1	5	12	GAS3-N350VS	0	FALSE	0	0.99	FALSE	1
1187	511.288	12	GAS3-N350VS		1	NVSLPTTK	NVSLPTTK[1187]	2	b	1	5	12	GAS3-N350VS	0	FALSE	0	0.99	FALSE	1
1212	511.288	12	GAS3-N350VS		1	NVSLPTTK	NVSLPTTK[1212]	2	b	1	5	12	GAS3-N350VS	0	FALSE	0	0.99	FALSE	1
1237	511.288	12	GAS3-N350VS		1	NVSLPTTK	NVSLPTTK[1237]	2	b	1	5	12	GAS3-N350VS	0	FALSE	0	0.99	FALSE	1
412.5	559.345	12	GAS3-N350VS		1	NVSLPTTK	NVSLPTTK[412]	2	y	1	5	12	GAS3-N350VS	0	FALSE	0	0.99	FALSE	1
437	559.345	12	GAS3-N350VS		1	NVSLPTTK	NVSLPTTK[437]	2	y	1	5	12	GAS3-N350VS	0	FALSE	0	0.99	FALSE	1
462	559.345	12	GAS3-N350VS		1	NVSLPTTK	NVSLPTTK[462]	2	y	1	5	12	GAS3-N350VS	0	FALSE	0	0.99	FALSE	1
487	559.345	12	GAS3-N350VS		1	NVSLPTTK	NVSLPTTK[487]	2	y	1	5	12	GAS3-N350VS	0	FALSE	0	0.99	FALSE	1
512	559.345	12	GAS3-N350VS		1	NVSLPTTK	NVSLPTTK[512]	2	y	1	5	12	GAS3-N350VS	0	FALSE	0	0.99	FALSE	1
537	559.345	12	GAS3-N350VS		1	NVSLPTTK	NVSLPTTK[537]	2	y	1	5	12	GAS3-N350VS	0	FALSE	0	0.99	FALSE	1
562	559.345	12	GAS3-N350VS		1	NVSLPTTK	NVSLPTTK[562]	2	y	1	5	12	GAS3-N350VS	0	FALSE	0	0.99	FALSE	1
587	559.345	12	GAS3-N350VS		1	NVSLPTTK	NVSLPTTK[587]	2	y	1	5	12	GAS3-N350VS	0	FALSE	0	0.99	FALSE	1
612	559.345	12	GAS3-N350VS		1	NVSLPTTK	NVSLPTTK[612]	2	y	1	5	12	GAS3-N350VS	0	FALSE	0	0.99	FALSE	1
637	559.345	12	GAS3-N350VS		1	NVSLPTTK	NVSLPTTK[637]	2	y	1	5	12	GAS3-N350VS	0	FALSE	0	0.99	FALSE	1
662	559.345	12	GAS3-N350VS		1	NVSLPTTK	NVSLPTTK[662]	2	y	1	5	12	GAS3-N350VS	0	FALSE	0	0.99	FALSE	1
687	559.345	12	GAS3-N350VS		1	NVSLPTTK	NVSLPTTK[687]	2	y	1	5	12	GAS3-N350VS	0	FALSE	0	0.99	FALSE	1
712	559.345	12	GAS3-N350VS		1	NVSLPTTK	NVSLPTTK[712]	2	y	1	5	12	GAS3-N350VS	0	FALSE	0	0.99	FALSE	1
737	559.345	12	GAS3-N350VS		1	NVSLPTTK	NVSLPTTK[737]	2	y	1	5	12	GAS3-N350VS	0	FALSE	0	0.99	FALSE	1
762	559.345	12	GAS3-N350VS		1	NVSLPTTK	NVSLPTTK[762]	2	y	1	5	12	GAS3-N350VS	0	FALSE	0	0.99	FALSE	1
787	559.345	12	GAS3-N350VS		1	NVSLPTTK	NVSLPTTK[787]	2	y	1	5	12	GAS3-N350VS	0	FALSE	0	0.99	FALSE	1
812	559.345	12	GAS3-N350VS		1	NVSLPTTK	NVSLPTTK[812]	2	y	1	5	12	GAS3-N350VS	0	FALSE	0	0.99	FALSE	1
837	559.345	12	GAS3-N350VS		1	NVSLPTTK	NVSLPTTK[837]	2	y	1	5	12	GAS3-N350VS	0	FALSE	0	0.99	FALSE	1
862	559.345	12	GAS3-N350VS		1	NVSLPTTK	NVSLPTTK[862]	2	y	1	5	12	GAS3-N350VS	0	FALSE	0	0.99	FALSE	1
887	559.345	12	GAS3-N350VS		1	NVSLPTTK	NVSLPTTK[887]	2	y	1	5	12	GAS3-N350VS	0	FALSE	0	0.99	FALSE	1
912	559.345	12	GAS3-N350VS		1	NVSLPTTK	NVSLPTTK[912]	2	y	1	5	12	GAS3-N350VS	0	FALSE	0	0.99	FALSE	1
937	559.345	12	GAS3-N350VS		1	NVSLPTTK	NVSLPTTK[937]	2	y	1	5	12	GAS3-N350VS	0	FALSE	0	0.99	FALSE	1
962	559.345	12	GAS3-N350VS		1	NVSLPTTK	NVSLPTTK[962]	2	y	1	5	12	GAS3-N350VS	0	FALSE	0	0.99	FALSE	1
987	559.345	12	GAS3-N350VS		1	NVSLPTTK	NVSLPTTK[987]	2	y	1	5	12	GAS3-N350VS	0	FALSE	0	0.99	FALSE	1
1012	559.345	12	GAS3-N350VS		1	NVSLPTTK	NVSLPTTK[1012]	2	y	1	5	12	GAS3-N350VS	0	FALSE	0	0.99	FALSE	1
1037	559.345	12	GAS3-N350VS		1	NVSLPTTK	NVSLPTTK[1037]	2	y	1	5	12	GAS3-N350VS	0	FALSE	0	0.99	FALSE	1
1062	559.345	12	GAS3-N350VS		1	NVSLPTTK	NVSLPTTK[1062]	2	y	1	5	12	GAS3-N350VS	0	FALSE	0	0.99	FALSE	1
1087	559.345	12	GAS3-N350VS		1	NVSLPTTK	NVSLPTTK[1087]	2	y	1	5	12	GAS3-N350VS	0	FALSE	0	0.99	FALSE	1
1112	559.345	12	GAS3-N350VS		1	NVSLPTTK	NVSLPTTK[1112]	2	y	1	5	12	GAS3-N350VS	0	FALSE	0	0.99	FALSE	1
1137	559.345	12	GAS3-N350VS		1	NVSLPTTK	NVSLPTTK[1137]	2	y	1	5	12	GAS3-N350VS	0	FALSE	0	0.99	FALSE	1
1162	559.345	12	GAS3-N350VS		1	NVSLPTTK	NVSLPTTK[1162]	2	y	1	5	12	GAS3-N350VS	0	FALSE	0	0.99	FALSE	1
1187	559.345	12	GAS3-N350VS		1	NVSLPTTK	NVSLPTTK[1187]	2	y	1	5	12	GAS3-N350VS	0	FALSE	0	0.99	FALSE	1
1212	559.345	12	GAS3-N350VS		1	NVSLPTTK	NVSLPTTK[1212]	2	y	1	5	12	GAS3-N350VS	0	FALSE	0	0.99	FALSE	1
1237	559.345	12	GAS3-N350VS		1	NVSLPTTK	NVSLPTTK[1237]	2	y	1	5	12	GAS3-N350VS	0	FALSE	0	0.99	FALSE	1
412.5	256.147	12	GAS3-N350VS		1	NVSLPTTK	NVSLPTTK[412]	2	b	2	5	12	GAS3-N350VS	0	FALSE	0	0.99	FALSE	1
437	256.147	12	GAS3-N350VS		1	NVSLPTTK	NVSLPTTK[437]	2	b	2	5	12	GAS3-N350VS	0	FALSE	0	0.99	FALSE	1
462	256.147	12	GAS3-N350VS		1	NVSLPTTK	NVSLPTTK[462]	2	b	2	5	12	GAS3-N350VS	0	FALSE	0	0.99	FALSE	1
487	256.147	12	GAS3-N350VS		1	NVSLPTTK	NVSLPTTK[487]	2	b	2	5	12	GAS3-N350VS	0	FALSE	0	0.99	FALSE	1
512	256.147	12	GAS3-N350VS		1	NVSLPTTK	NVSLPTTK[512]	2	b	2	5	12	GAS3-N350VS	0	FALSE	0	0.99	FALSE	1
537	256.147	12	GAS3-N350VS		1	NVSLPTTK	NVSLPTTK[537]	2	b	2	5	12	GAS3-N350VS	0	FALSE	0	0.99	FALSE	1
562	256.147	12	GAS3-N350VS		1	NVSLPTTK	NVSLPTTK[562]	2	b	2	5	12	GAS3-N350VS	0	FALSE	0	0.99	FALSE	1
587	256.147	12	GAS3-N350VS		1	NVSLPTTK	NVSLPTTK[587]	2	b	2	5	12	GAS3-N350VS	0	FALSE	0	0.99	FALSE	1
612	256.147	12	GAS3-N350VS		1	NVSLPTTK	NVSLPTTK[612]	2	b	2	5	12	GAS3-N350VS	0	FALSE	0	0.99	FALSE	1
637	256.147	12	GAS3-N350VS		1	NVSLPTTK	NVSLPTTK[637]	2	b	2	5	12	GAS3-N350VS	0	FALSE	0	0.99	FALSE	1
662	256.147	12	GAS3-N350VS		1	NVSLPTTK	NVSLPTTK[662]	2	b	2	5	12	GAS3-N350VS	0	FALSE	0	0.99	FALSE	1
687	256.147	12	GAS3-N350VS		1	NVSLPTTK	NVSLPTTK[687]	2	b	2	5	12	GAS3-N350VS	0	FALSE	0	0.99	FALSE	1
712	256.147	12	GAS3-N350VS		1	NVSLPTTK	NVSLPTTK[712]	2	b	2	5	12	GAS3-N350VS	0	FALSE	0	0.99	FALSE	1
737	256.147	12	GAS3-N350VS		1	NVSLPTTK	NVSLPTTK[737]	2	b	2	5	12	GAS3-N350VS	0	FALSE	0	0.99	FALSE	1
762	256.147	12	GAS3-N350VS		1	NVSLPTTK	NVSLPTTK[762]	2	b	2	5	12	GAS3-N350VS	0	FALSE	0	0.99	FALSE	1
787	256.147	12	GAS3-N350VS		1	NVSLPTTK	NVSLPTTK[787]	2	b	2	5	12	GAS3-N350VS	0	FALSE	0	0.99	FALSE	1
812	256.147	12	GAS3-N350VS		1	NVSLPTTK	NVSLPTTK[812]	2	b	2	5	12	GAS3-N350VS	0	FALSE	0	0.99	FALSE	1
837	256.147	12	GAS3-N350VS		1	NVSLPTTK	NVSLPTTK[837]	2	b	2	5	12	GAS3-N350VS	0	FALSE	0	0.99	FALSE	1
862	256.147	12	GAS3-N350VS		1	NVSLPTTK	NVSLPTTK[862]	2	b	2	5	12	GAS3-N350VS	0	FALSE	0	0.99	FALSE	1
887	256.147	12	GAS3-N350VS		1	NVSLPTTK	NVSLPTTK[887]	2	b	2	5	12	GAS3-N350VS	0	FALSE	0	0.99	FALSE	1
912	256.147	12	GAS3-N350VS		1	NVSLPTTK	NVSLPTTK[912]	2	b	2	5	12	GAS3-N350VS	0	FALSE	0	0.99	FALSE	1
937	256.147	12	GAS3-N350VS		1	NVSLPTTK	NVSLPTTK[937]	2	b	2	5	12	GAS3-N350VS	0	FALSE	0	0.99	FALSE	1
962	256.147	12	GAS3-N350VS		1	NVSLPTTK	NVSLPTTK[962]	2	b	2	5	12	GAS3-N350VS	0	FALSE	0	0.99	FALSE	1
987	256.147	12	GAS3-N350VS		1	NVSLPTTK	NVSLPTTK[987]	2	b	2	5	12	GAS3-N350VS	0	FALSE	0	0.99	FALSE	1
1012	256.147	12	GAS3-N350VS		1	NVSLPTTK	NVSLPTTK[1012]	2	b	2	5	12	GAS3-N350VS	0	FALSE	0	0.99	FALSE	1
1037	256.147	12	GAS3-N350VS		1	NVSLPTTK	NVSLPTTK[1037]	2	b	2	5	12	GAS3-N350VS	0	FALSE	0	0.99	FALSE	1
1062	256.147	12	GAS3-N350VS		1	NVSLPTTK	NVSLPTTK[1062]	2	b	2	5	12	GAS3-N350VS	0	FALSE	0	0.99	FALSE	1
1087	256.147	12	GAS3-N350VS		1	NVSLPTTK	NVSLPTTK[1087]	2	b	2	5	12	GAS3-N350VS	0	FALSE	0	0.99	FALSE	1
1112	256.147	12	GAS3-N350VS		1	NVSLPTTK	NVSLPTTK[1112]	2	b	2	5	12	GAS3-N350VS	0	FALSE	0	0.99	FALSE	1
1137	256.147	12	GAS3-N350VS		1	NVSLPTTK	NVSLPTTK[1137]	2	b	2	5	12	GAS3-N350VS	0	FALSE	0	0.99	FALSE	1
1162	256.147	12	GAS3-N350VS		1	NVSLPTTK	NVSLPTTK[1162]	2	b	2	5	12	GAS3-N350VS	0	FALSE	0	0.99	FALSE	1
1187	256.147	12	GAS3-N350VS		1	NVSLPTTK	NVSLPTTK[1187]	2	b	2	5	12	GAS3-N350VS	0	FALSE	0	0.99	FALSE	1
1212	256.147	12	GAS3-N350VS		1	NVSLPTTK	NVSLPTTK[1212]	2	b	2	5	12	GAS3-N350VS	0	FALSE	0	0.99	FALSE	1
1237	256.147	12	GAS3-N350VS		1	NVSLPTTK	NVSLPTTK[1237]	2	b	2	5	12	GAS3-N350VS	0	FALSE	0	0.99	FALSE	1
412.5	280.176	12	GAS3-N350VS		1	NVSLPTTK	NVSLPTTK[412]	2	y	2	5	12	GAS3-N350VS	0	FALSE	0	0.99	FALSE	1
437	280.176	12	GAS3-N350VS		1	NVSLPTTK	NVSLPTTK[437]	2	y	2	5	12	GAS3-N350VS	0	FALSE	0	0.99	FALSE	1
462	280.176	12	GAS3-N350VS		1	NVSLPTTK	NVSLPTTK[462]	2	y	2	5	12	GAS3-N350VS	0	FALSE	0	0.99	FALSE	1
487	280.176	12	GAS3-N350VS		1	NVSLPTTK	NVSLPTTK[487]	2	y	2	5	12	GAS3-N350VS	0	FALSE	0	0.99	FALSE	1
512	280.176	12	GAS3-N350VS		1	NVSLPTTK	NVSLPTTK[512]	2	y	2	5	12	GAS3-N350VS	0	FALSE	0	0.99	FALSE	1
537	280.176	12	GAS3-N350VS		1	NVSLPTTK	NVSLPTTK[537]	2	y	2	5	12	GAS3-N350VS	0	FALSE	0	0.99	FALSE	1
562	280.176	12	GAS3-N350VS		1	NVSLPTTK	NVSLPTTK[562]	2	y	2	5	12	GAS3-N350VS	0	FALSE	0	0.99	FALSE	1
587	280.176	12	GAS3-N350VS		1	NVSLPTTK	NVSLPTTK[587]	2	y	2	5	12	GAS3-N350VS	0	FALSE	0	0.99	FALSE	1
612	280.176	12	GAS3-N350VS		1	NVSLPTTK	NVSLPTTK[612]	2	y	2	5	12	GAS3-N350VS	0	FALSE	0	0.99	FALSE	1
637	280.176	12	GAS3-N350VS		1	NVSLPTTK	NVSLPTTK[637]	2	y	2	5	12	GAS3-N350VS	0	FALSE	0	0.99	FALSE	1
662	280.176	12	GAS3-N350VS		1	NVSLPTTK	NVSLPTTK[662]	2	y	2	5	12	GAS3-N350VS	0	FALSE	0	0.99	FALSE	1
687	280.176	12	GAS3-N350VS		1	NVSLPTTK	NVSLPTTK[687]	2	y	2	5	12	GAS3-N350VS	0	FALSE	0	0.99	FALSE	1
712	280.176	12	GAS3-N350VS		1	NVSLPTTK	NVSLPTTK[712]	2	y	2	5	12	GAS3-N350VS	0	FALSE	0	0.99	FALSE	1
737	280.176	12	GAS3-N350VS		1	NVSLPTTK	NVSLPTTK[737]	2	y	2	5	12	GAS3-N350VS	0	FALSE	0	0.99	FALSE	1
762	280.176	12	GAS3-N350VS		1	NVSLPTTK	NVSLPTTK[762]	2	y	2	5	12	GAS3-N350VS	0	FALSE	0	0.99	FALSE	1
787	280.176	12	GAS3-N350VS		1	NVSLPTTK	NVSLPTTK[787]	2	y	2	5	12	GAS3-N350VS	0	FALSE	0	0.99	FALSE	1
812	280.176	12	GAS3-N350VS		1	NVSLPTTK	NVSLPTTK[812]	2	y	2	5	12	GAS3-N350VS	0	FALSE	0	0.99	FALSE	1
837	280.176	12	GAS3-N350VS		1	NVSLPTTK	NVSLPTTK[837]	2	y	2	5	12	GAS3-N350VS	0	FALSE	0	0.99	FALSE	1
862	280.176	12	GAS3-N350VS		1	NVSLPTTK	NVSLPTTK[862]	2	y	2	5	12	GAS3-N350VS	0	FALSE	0	0.99	FALSE	1
887	280.176	12	GAS3-N350VS		1	NVSLPTTK	NVSLPTTK[887]	2	y	2	5	12	GAS3-N350VS	0	FALSE	0	0.99	FALSE	1
912	280.176	12	GAS3-N350VS		1	NVSLPTTK	NVSLPTTK[912]	2	y	2	5	12	GAS3-N350VS	0	FALSE	0	0.99	FALSE	1
937	280.176	12	GAS3-N350VS		1	NVSLPTTK	NVSLPTTK[937]	2	y	2	5	12	GAS3-N350VS	0	FALSE	0	0.99	FALSE	1
962	280.176	12	GAS3-N350VS		1	NVSLPTTK	NVSLPTTK[962]	2	y	2	5	12	GAS3-N350VS	0	FALSE	0	0.99	FALSE	1
987	280.176	12	GAS3-N350VS		1	NVSLPTTK	NVSLPTTK[987]	2	y	2	5	12	GAS3-N350VS	0	FALSE	0	0.99	FALSE	1
1012	280.176	12	GAS3-N350VS		1	NVSLPTTK	NVSLPTTK[1012]	2	y	2	5	12	GAS3-N350VS	0	FALSE	0	0.99	FALSE	1
1037	280.176	12	GAS3-N350VS		1	NVSLPTTK	NVSLPTTK[1037]	2	y	2	5	12	GAS3-N350VS	0	FALSE	0	0.99	FALSE	1
1062	280.176	12	GAS3-N350VS		1	NVSLPTTK	NVSLPTTK[1062]	2	y	2	5	12	GAS3-N350VS	0	FALSE	0	0.99	FALSE	1
1087	280.176	12	GAS3-N350VS		1	NVSLPTTK	NVSLPTTK[1087]	2	y	2	5	12	GAS3-N350VS	0	FALSE	0	0.99	FALSE	1
1112	280.176	12	GAS3-N350VS		1	NVSLPTTK	NVSLPTTK[1112]	2	y	2	5	12	GAS3-N350VS	0	FALSE	0	0.99	FALSE	1
1137	280.176	12	GAS3-N350VS		1	NVSLPTTK	NVSLPTTK[1137]	2	y	2	5	12	GAS3-N350VS	0	FALSE	0	0.99	FALSE	1
1162	280.176	12	GAS3-N350VS		1	NVSLPTTK	NVSLPTTK[1162]	2	y	2	5	12	GAS3-N350VS	0	FALSE	0	0.99	FALSE	1
1187	280.176	12	GAS3-N350VS		1	NVSLPTTK	NVSLPTTK[1187]	2	y	2	5	12	GAS3-N350VS	0	FALSE	0	0.99	FALSE	1
1212	280.176	12	GAS3-N350VS		1	NVSLPTTK	NVSLPTTK[1212]	2	y	2	5	12	GAS3-N350VS	0	FALSE	0	0.99	FALSE	1
1237	280.176	12	GAS3-N350VS		1	NVSLPTTK	NVSLPTTK[1237]	2	y	2	5	12	GAS3-N350VS	0	FALSE	0	0.99	FALSE	1
412.5	612.335	12	GAS3-N350VS		1	NVSLPTTK	NVSLPTTK[412]	2	b	1	6	12	GAS3-N350VS	0	FALSE	0	0.99	FALSE	1
437	612.335	12	GAS3-N350VS		1	NVSLPTTK	NVSLPTTK[437]	2	b	1	6	12	GAS3-N350VS	0	FALSE	0	0.99	FALSE	1
462	612.335	12	GAS3-N350VS		1	NVSLPTTK	NVSLPTTK[462]	2	b	1	6	12	GAS3-N350VS	0	FALSE	0	0.99	FALSE	1
487	612.335	12	GAS3-N350VS		1	NVSLPTTK	NVSLPTTK[487]	2	b	1	6	12	GAS3-N350VS	0	FALSE	0	0.99	FALSE	1
512	612.335	12	GAS3-N350VS		1	NVSLPTTK	NVSLPTTK[512]	2	b	1	6	12	GAS3-N350VS	0	FALSE	0	0.99	FALSE	1
537	612.335	12	GAS3-N350VS		1	NVSLPTTK	NVSLPTTK[537]	2	b	1	6	12	GAS3-N350VS	0	FALSE	0	0.99	FALSE	1
562	612.335	12	GAS3-N350VS		1	NVSLPTTK	NVSLPTTK[562]	2	b	1	6	12	GAS3-N350VS	0	FALSE	0	0.99	FALSE	1
587	612.335	12	GAS3-N350VS		1	NVSLPTTK	NVSLPTTK[587]	2	b	1	6	12	GAS3-N350VS	0	FALSE	0	0.99	FALSE	1
612	612.335	12	GAS3-N350VS		1	NVSLPTTK	NVSLPTTK[612]	2	b	1	6	12	GAS3-N350VS	0	FALSE	0	0.99	FALSE	1
637	612.335	12	GAS3-N350VS		1	NVSLPTTK	NVSLPTTK[637]	2	b	1	6	12	GAS3-N350VS	0	FALSE	0	0.99	FALSE	1
662	612.335	12	GAS3-N350VS		1	NVSLPTTK	NVSLPTTK[662]	2	b	1	6	12	GAS3-N350VS	0	FALSE	0	0.99	FALSE	1
687	612.335	12	GAS3-N350VS		1	NVSLPTTK	NVSLPTTK[687]	2	b	1	6	12	GAS3-N350VS	0	FALSE	0	0.99	FALSE	1
712	612.335	12	GAS3-N350VS		1	NVSLPTTK	NVSLPTTK[712]	2	b	1	6	12	GAS3-N350VS	0	FALSE	0	0.99	FALSE	1
737	612.335	12	GAS3-N350VS		1	NVSLPTTK	NVSLPTTK[737]	2	b	1	6	12	GAS3-N350VS	0	FALSE	0	0.99	FALSE	1
762	612.335	12	GAS3-N350VS		1	NVSLPTTK	NVSLPTTK[762]	2	b	1	6	12	GAS3-N350VS	0	FALSE	0	0.99	FALSE	1
787	612.335	12	GAS3-N350VS		1	NVSLPTTK	NVSLPTTK[787]	2	b	1	6	12	GAS3-N350VS	0	FALSE	0	0.99	FALSE	1
812	612.335	12	GAS3-N350VS		1	NVSLPTTK	NVSLPTTK[812]	2	b	1	6	12	GAS3-N350VS	0	FALSE	0	0.99	FALSE	1
837	612.335	12	GAS3-N350VS		1	NVSLPTTK	NVSLPTTK[837]	2	b	1	6	12	GAS3-N350VS	0	FALSE	0	0.99	FALSE	1
862	612.335	12	GAS3-N350VS		1	NVSLPTTK	NVSLPTTK[862]	2	b	1	6	12	GAS3-N350VS	0	FALSE	0	0.99	FALSE	1
887	612.335	12	GAS3-N350VS		1	NVSLPTTK	NVSLPTTK[887]	2	b	1	6	12	GAS3-N350VS	0	FALSE	0	0.99	FALSE	1
912	612.335	12	GAS3-N350VS		1	NVSLPTTK	NVSLPTTK[912]	2	b	1	6	12	GAS3-N350VS	0	FALSE	0	0.99	FALSE	1
937	612.335	12	GAS3-N350VS		1	NVSLPTTK	NVSLPTTK[937]	2	b	1	6	12	GAS3-N350VS	0	FALSE	0	0.99	FALSE	1
962	612.335	12	GAS3-N350VS		1	NVSLPTTK	NVSLPTTK[962]	2	b	1	6	12	GAS3-N350VS	0	FALSE	0	0.99	FALSE	1
987	612.335	12	GAS3-N350VS		1	NVSLPTTK	NVSLPTTK[987]	2	b	1	6	12	GAS3-N350VS	0	FALSE	0	0.99	FALSE	1
1012	612.335	12	GAS3-N350VS		1	NVSLPTTK	NVSLPTTK[1012]	2	b	1	6	12	GAS3-N350VS	0	FALSE	0	0.99	FALSE	1
1037	612.335	12	GAS3-N350VS		1	NVSLPTTK	NVSLPTTK[1037]	2	b	1	6	12	GAS3-N350VS	0	FALSE	0	0.99	FALSE	1
1062	612.335	12	GAS3-N350VS		1	NVSLPTTK	NVSLPTTK[1062]	2	b	1	6	12	GAS3-N350VS	0	FALSE	0	0.99	FALSE	1
1087	612.335	12	GAS3-N350VS		1	NVSLPTTK	NVSLPTTK[1087]	2	b	1	6	12	GAS3-N350VS	0	FALSE	0	0.99	FALSE	1
1112	612.335	12	GAS3-N350VS		1	NVSLPTTK	NVSLPTTK[1112]	2	b	1	6	12	GAS3-N350VS	0	FALSE	0	0.99	FALSE	1
1137	612.335	12	GAS3-N350VS		1	NVSLPTTK	NVSLPTTK[1137]	2	b	1	6	12	GAS3-N350VS	0	FALSE	0	0.99	FALSE	1
1162	612.335	12	GAS3-N350VS		1	NVSLPTTK	NVSLPTTK[1162]	2	b	1	6	12	GAS3-N350VS	0	FALSE	0	0.99	FALSE	1
1187	612.335	12	GAS3-N350VS		1	NVSLPTTK	NVSLPTTK[1187]	2	b	1	6	12	GAS3-N350VS	0	FALSE	0	0.99	FALSE	1
1212	612.335	12	GAS3-N350VS		1	NVSLPTTK	NVSLPTTK[1212]	2	b	1	6	12	GAS3-N350VS	0	FALSE	0	0.99	FALSE	1
1237	612.335	12	GAS3-N350VS		1	NVSLPTTK	NVSLPTTK[1237]	2	b	1	6	12	GAS3-N350VS	0	FALSE	0	0.99	FALSE	1
412.5	646.377	12	GAS3-N350VS		1	NVSLPTTK	NVSLPTTK[412]	2	y	1	6	12	GAS3-N350VS	0	FALSE	0	0.99	FALSE	1
437	646.377	12	GAS3-N350VS		1	NVSLPTTK	NVSLPTTK[437]	2	y	1	6	12	GAS3-N350VS	0	FALSE	0	0.99	FALSE	1
462	646.377	12	GAS3-N350VS		1	NVSLPTTK	NVSLPTTK[462]	2	y	1	6	12	GAS3-N350VS	0	FALSE	0	0.99	FALSE	1
487	646.377	12	GAS3-N350VS		1	NVSLPTTK	NVSLPTTK[487]	2	y	1	6	12	GAS3-N350VS	0	FALSE	0	0.99	FALSE	1
512	646.377	12	GAS3-N350VS		1	NVSLPTTK	NVSLPTTK[512]	2	y	1	6	12	GAS3-N350VS	0	FALSE	0	0.99	FALSE	1
537	646.377	12	GAS3-N350VS		1	NVSLPTTK	NVSLPTTK[537]	2	y	1	6	12	GAS3-N350VS	0	FALSE	0	0.99	FALSE	1
562	646.377	12	GAS3-N350VS		1	NVSLPTTK	NVSLPTTK[562]	2	y	1	6	12	GAS3-N350VS	0	FALSE	0	0.99	FALSE	1
587	646.377	12	GAS3-N350VS		1	NVSLPTTK	NVSLPTTK[587]	2	y	1	6	12	GAS3-N350VS	0	FALSE	0	0.99	FALSE	1
612	646.377	12	GAS3-N350VS		1	NVSLPTTK	NVSLPTTK[612]	2	y	1	6	12	GAS3-N350VS	0	FALSE	0	0.99	FALSE	1
637	646.377	12	GAS3-N350VS		1	NVSLPTTK	NVSLPTTK[637]	2	y	1	6	12	GAS3-N350VS	0	FALSE	0	0.99	FALSE	1
662	646.377	12	GAS3-N350VS		1	NVSLPTTK	NVSLPTTK[662]	2	y	1	6	12	GAS3-N350VS	0	FALSE	0	0.99	FALSE	1
687	646.377	12	GAS3-N350VS		1	NVSLPTTK	NVSLPTTK[687]	2	y	1	6	12	GAS3-N350VS	0	FALSE	0	0.99	FALSE	1
712	646.377	12	GAS3-N350VS		1	NVSLPTTK	NVSLPTTK[712]	2	y	1	6	12	GAS3-N350VS	0	FALSE	0	0.99	FALSE	1
737	646.377	12	GAS3-N350VS		1	NVSLPTTK	NVSLPTTK[737]	2	y	1	6	12	GAS3-N350VS	0	FALSE	0	0.99	FALSE	1
762	646.377	12	GAS3-N350VS		1	NVSLPTTK	NVSLPTTK[762]	2	y	1	6	12	GAS3-N350VS	0	FALSE	0	0.99	FALSE	1
787	646.377	12	GAS3-N350VS		1	NVSLPTTK	NVSLPTTK[787]	2	y	1	6	12	GAS3-N350VS	0	FALSE	0	0.99	FALSE	1
812	646.377	12	GAS3-N350VS		1	NVSLPTTK	NVSLPTTK[812]	2	y	1	6	12	GAS3-N350VS	0	FALSE	0	0.99	FALSE	1
837	646.377	12	GAS3-N350VS		1	NVSLPTTK	NVSLPTTK[837]	2	y	1	6	12	GAS3-N350VS	0	FALSE	0	0.99	FALSE	1
862	646.377	12	GAS3-N350VS		1	NVSLPTTK	NVSLPTTK[862]	2	y	1	6	12	GAS3-N350VS	0	FALSE	0	0.99	FALSE	1
887	646.377	12	GAS3-N350VS		1	NVSLPTTK	NVSLPTTK[887]	2	y	1	6	12	GAS3-N350VS	0	FALSE	0	0.99	FALSE	1
912	646.377	12	GAS3-N350VS		1	NVSLPTTK	NVSLPTTK[912]	2	y	1	6	12	GAS3-N350VS	0	FALSE	0	0.99	FALSE	1
937	646.377	12	GAS3-N350VS		1	NVSLPTTK	NVSLPTTK[937]	2	y	1	6	12	GAS3-N350VS	0	FALSE	0	0.99	FALSE	1
962	646.377	12	GAS3-N350VS		1	NVSLPTTK	NVSLPTTK[962]	2	y	1	6	12	GAS3-N350VS	0	FALSE	0	0.99	FALSE	1
987	646.377	12	GAS3-N350VS		1	NVSLPTTK	NVSLPTTK[987]	2	y	1	6	12	GAS3-N350VS	0	FALSE	0	0.99	FALSE	1
1012	646.377	12	GAS3-N350VS		1	NVSLPTTK	NVSLPTTK[1012]	2	y	1	6	12	GAS3-N350VS	0	FALSE	0	0.99	FALSE	1
1037	646.377	12	GAS3-N350VS		1	NVSLPTTK	NVSLPTTK[1037]	2	y	1	6	12	GAS3-N350VS	0	FALSE	0	0.99	FALSE	1
1062	646.377	12	GAS3-N350VS		1	NVSLPTTK	NVSLPTTK[1062]	2	y	1	6	12	GAS3-N350VS	0	FALSE	0	0.99	FALSE	1
1087	646.377	12	GAS3-N350VS		1	NVSLPTTK	NVSLPTTK[1087]	2	y	1	6	12	GAS3-N350VS	0	FALSE	0	0.99	FALSE	1
1112	646.377	12	GAS3-N350VS		1	NVSLPTTK	NVSLPTTK[1112]	2	y	1	6	12	GAS3-N350VS	0	FALSE	0	0.99	FALSE	1
1137	646.377	12	GAS3-N350VS		1	NVSLPTTK	NVSLPTTK[1137]	2	y	1	6	12	GAS3-N350VS	0	FALSE	0	0.99	FALSE	1
1162	646.377	12	GAS3-N350VS		1	NVSLPTTK	NVSLPTTK[1162]	2	y	1	6	12	GAS3-N350VS	0	FALSE	0	0.99	FALSE	1
1187	646.377	12	GAS3-N350VS		1	NVSLPTTK	NVSLPTTK[1187]	2	y	1	6	12	GAS3-N350VS	0	FALSE	0	0.99	FALSE	1
1212	646.377	12	GAS3-N350VS		1	NVSLPTTK	NVSLPTTK[1212]	2	y	1	6	12	GAS3-N350VS	0	FALSE	0	0.99	FALSE	1
1237	646.377	12	GAS3-N350VS		1	NVSLPTTK	NVSLPTTK[1237]	2	y	1	6	12	GAS3-N350VS	0	FALSE	0	0.99	FALSE	1
412.5	306.671	12	GAS3-N350VS		1	NVSLPTTK	NVSLPTTK[412]	2	b	2	6	12	GAS3-N350VS	0	FALSE	0	0.99	FALSE	1
437	306.671	12	GAS3-N350VS		1	NVSLPTTK	NVSLPTTK[437]	2	b	2	6	12	GAS3-N350VS	0	FALSE	0	0.99	FALSE	1
462	306.671	12	GAS3-N350VS		1	NVSLPTTK	NVSLPTTK[462]	2	b	2	6	12	GAS3-N350VS	0	FALSE	0	0.99	FALSE	1
487	306.671	12	GAS3-N350VS		1	NVSLPTTK	NVSLPTTK[487]	2	b	2	6	12	GAS3-N350VS	0	FALSE	0	0.99	FALSE	1
512	306.671	12	GAS3-N350VS		1	NVSLPTTK	NVSLPTTK[512]	2	b	2	6	12	GAS3-N350VS	0	FALSE	0	0.99	FALSE	1
537	306.671	12	GAS3-N350VS		1	NVSLPTTK	NVSLPTTK[537]	2	b	2	6	12	GAS3-N350VS	0	FALSE	0	0.99	FALSE	1
562	306.671	12	GAS3-N350VS		1	NVSLPTTK	NVSLPTTK[562]	2	b	2	6	12	GAS3-N350VS	0	FALSE	0	0.99	FALSE	1
587	306.671	12	GAS3-N350VS		1	NVSLPTTK	NVSLPTTK[587]	2	b	2	6	12	GAS3-N350VS	0	FALSE	0	0.99	FALSE	1
612	306.671	12	GAS3-N350VS		1	NVSLPTTK	NVSLPTTK[612]	2	b	2	6	12	GAS3-N350VS	0	FALSE	0	0.99	FALSE	1
637	306.671	12	GAS3-N350VS		1	NVSLPTTK	NVSLPTTK[637]	2	b	2	6	12	GAS3-N350VS	0	FALSE	0	0.99	FALSE	1
662	306.671	12	GAS3-N350VS		1	NVSLPTTK	NVSLPTTK[662]	2	b	2	6	12	GAS3-N350VS	0	FALSE	0	0.99	FALSE	1
687	306.671	12	GAS3-N350VS		1	NVSLPTTK	NVSLPTTK[687]	2	b	2	6	12	GAS3-N350VS	0	FALSE	0	0.99	FALSE	1
712	306.671	12	GAS3-N350VS		1	NVSLPTTK	NVSLPTTK[712]	2	b	2	6	12	GAS3-N350VS	0	FALSE	0	0.99	FALSE	1
737	306.671	12	GAS3-N350VS		1	NVSLPTTK	NVSLPTTK[737]	2	b	2	6	12	GAS3-N350VS	0	FALSE	0	0.99	FALSE	1
762	306.671	12	GAS3-N350VS		1	NVSLPTTK	NVSLPTTK[762]	2	b	2	6	12	GAS3-N350VS	0	FALSE	0	0.99	FALSE	1
787	306.671	12	GAS3-N350VS		1	NVSLPTTK	NVSLPTTK[787]	2	b	2	6	12	GAS3-N350VS	0	FALSE	0	0.99	FALSE	1
812	306.671	12	GAS3-N350VS		1	NVSLPTTK	NVSLPTTK[812]	2	b	2	6	12	GAS3-N350VS	0	FALSE	0	0.99	FALSE	1
837	306.671	12	GAS3-N350VS		1	NVSLPTTK	NVSLPTTK[837]	2	b	2	6	12	GAS3-N350VS	0	FALSE	0	0.99	FALSE	1
862	306.671	12	GAS3-N350VS		1	NVSLPTTK	NVSLPTTK[862]	2	b	2	6	12	GAS3-N350VS	0	FALSE	0	0.99	FALSE	1
887	306.671	12	GAS3-N350VS		1	NVSLPTTK	NVSLPTTK[887]	2	b	2	6	12	GAS3-N350VS	0	FALSE	0	0.99	FALSE	1
912	306.671	12	GAS3-N350VS		1	NVSLPTTK	NVSLPTTK[912]	2	b	2	6	12	GAS3-N350VS	0	FALSE	0	0.99	FALSE	1
937	306.671	12	GAS3-N350VS		1	NVSLPTTK	NVSLPTTK[937]	2	b	2	6	12	GAS3-N350VS	0	FALSE	0	0.99	FALSE	1
962	306.671	12	GAS3-N350VS		1	NVSLPTTK	NVSLPTTK[962]	2	b	2	6	12	GAS3-N350VS	0	FALSE	0	0.99	FALSE	1
987	306.671	12	GAS3-N350VS		1	NVSLPTTK	NVSLPTTK[987]	2	b	2	6	12	GAS3-N350VS	0	FALSE	0	0.99	FALSE	1
1012	306.671	12	GAS3-N350VS		1	NVSLPTTK	NVSLPTTK[1012]	2	b	2	6	12	GAS3-N350VS	0	FALSE	0	0.99	FALSE	1
1037	306.671	12	GAS3-N350VS		1	NVSLPTTK	NVSLPTTK[1037]	2	b	2	6	12	GAS3-N350VS	0	FALSE	0	0.99	FALSE	1
1062	306.671	12	GAS3-N350VS		1	NVSLPTTK	NVSLPTTK[1062]	2	b	2	6	12	GAS3-N350VS	0	FALSE	0	0.99	FALSE	1
1087	306.671	12	GAS3-N350VS		1	NVSLPTTK	NVSLPTTK[1087]	2	b	2	6	12	GAS3-N350VS	0	FALSE	0	0.99	FALSE	1
1112	306.671	12	GAS3-N350VS		1	NVSLPTTK	NVSLPTTK[1112]	2	b	2	6	12	GAS3-N350VS	0	FALSE	0	0.99	FALSE	1
1137	306.671	12	GAS3-N350VS		1	NVSLPTTK	NVSLPTTK[1137]	2	b	2	6	12	GAS3-N350VS	0	FALSE	0	0.99	FALSE	1
1162	306.671	12	GAS3-N350VS		1	NVSLPTTK	NVSLPTTK[1162]	2	b	2	6	12	GAS3-N350VS	0	FALSE	0	0.99	FALSE	1
1187	306.671	12	GAS3-N350VS		1	NVSLPTTK	NVSLPTTK[1187]	2	b	2	6	12	GAS3-N350VS	0	FALSE	0	0.99	FALSE	1
1212	306.671	12	GAS3-N350VS		1	NVSLPTTK	NVSLPTTK[1212]	2	b	2	6	12	GAS3-N350VS	0	FALSE	0	0.99	FALSE	1
1237	306.671	12	GAS3-N350VS		1	NVSLPTTK	NVSLPTTK[1237]	2	b	2	6	12	GAS3-N350VS	0	FALSE	0	0.99	FALSE	1
412.5	323.692	12	GAS3-N350VS		1	NVSLPTTK	NVSLPTTK[412]	2	y	2	6	12	GAS3-N350VS	0	FALSE	0	0.99	FALSE	1
437	323.692	12	GAS3-N350VS		1	NVSLPTTK	NVSLPTTK[437]	2	y	2	6	12	GAS3-N350VS	0	FALSE	0	0.99	FALSE	1
462	323.692	12	GAS3-N350VS		1	NVSLPTTK	NVSLPTTK[462]	2	y	2	6	12	GAS3-N350VS	0	FALSE	0	0.99	FALSE	1
487	323.692	12	GAS3-N350VS		1	NVSLPTTK	NVSLPTTK[487]	2	y	2	6	12	GAS3-N350VS	0	FALSE	0	0.99	FALSE	1
512	323.692	12	GAS3-N350VS		1	NVSLPTTK	NVSLPTTK[512]	2	y	2	6	12	GAS3-N350VS	0	FALSE	0	0.99	FALSE	1
537	323.692	12	GAS3-N350VS		1	NVSLPTTK	NVSLPTTK[537]	2	y	2	6	12	GAS3-N350VS	0	FALSE	0	0.99	FALSE	1
562	323.692	12	GAS3-N350VS		1	NVSLPTTK	NVSLPTTK[562]	2	y	2	6	12	GAS3-N350VS	0	FALSE	0	0.99	FALSE	1
587	323.692	12	GAS3-N350VS		1	NVSLPTTK	NVSLPTTK[587]	2	y	2	6	12	GAS3-N350VS	0	FALSE	0	0.99	FALSE	1
612	323.692	12	GAS3-N350VS		1	NVSLPTTK	NVSLPTTK[612]	2	y	2	6	12	GAS3-N350VS	0	FALSE	0	0.99	FALSE	1
637	323.692	12	GAS3-N350VS		1	NVSLPTTK	NVSLPTTK[637]	2	y	2	6	12	GAS3-N350VS	0	FALSE	0	0.99	FALSE	1
662	323.692	12	GAS3-N350VS		1	NVSLPTTK	NVSLPTTK[662]	2	y	2	6	12	GAS3-N350VS	0	FALSE	0	0.99	FALSE	1
687	323.692	12	GAS3-N350VS		1	NVSLPTTK	NVSLPTTK[687]	2	y	2	6	12	GAS3-N350VS	0	FALSE	0	0.99	FALSE	1
712	323.692	12	GAS3-N350VS		1	NVSLPTTK	NVSLPTTK[712]	2	y	2	6	12	GAS3-N350VS	0	FALSE	0	0.99	FALSE	1
737	323.692	12	GAS3-N350VS		1	NVSLPTTK	NVSLPTTK[737]	2	y	2	6	12	GAS3-N350VS	0	FALSE	0	0.99	FALSE	1
762	323.692	12	GAS3-N350VS		1	NVSLPTTK	NVSLPTTK[762]	2	y	2	6	12	GAS3-N350VS	0	FALSE	0	0.99	FALSE	1
787	323.692	12	GAS3-N350VS		1	NVSLPTTK	NVSLPTTK[787]	2	y	2	6	12	GAS3-N350VS	0	FALSE	0	0.99	FALSE	1
812	323.692	12	GAS3-N350VS		1	NVSLPTTK	NVSLPTTK[812]	2	y	2	6	12	GAS3-N350VS	0	FALSE	0	0.99	FALSE	1
837	323.692	12	GAS3-N350VS		1	NVSLPTTK	NVSLPTTK[837]	2	y	2	6	12	GAS3-N350VS	0	FALSE	0	0.99	FALSE	1
862	323.692	12	GAS3-N350VS		1	NVSLPTTK	NVSLPTTK[862]	2	y	2	6	12	GAS3-N350VS	0	FALSE	0	0.99	FALSE	1
887	323.692	12	GAS3-N350VS		1	NVSLPTTK	NVSLPTTK[887]	2	y	2	6	12	GAS3-N350VS	0	FALSE	0	0.99	FALSE	1
912	323.692	12	GAS3-N350VS		1	NVSLPTTK	NVSLPTTK[912]	2	y	2	6	12	GAS3-N350VS	0	FALSE	0	0.99	FALSE	1
937	323.692	12	GAS3-N350VS		1	NVSLPTTK	NVSLPTTK[937]	2	y	2	6	12	GAS3-N350VS	0	FALSE	0	0.99	FALSE	1
962	323.692	12	GAS3-N350VS		1	NVSLPTTK	NVSLPTTK[962]	2	y	2	6	12	GAS3-N350VS	0	FALSE	0	0.99	FALSE	1
987	323.692	12	GAS3-N350VS		1	NVSLPTTK	NVSLPTTK[987]	2	y	2	6	12	GAS3-N350VS	0	FALSE	0	0.99	FALSE	1
1012	323.692	12	GAS3-N350VS		1	NVSLPTTK	NVSLPTTK[1012]	2	y	2	6	12	GAS3-N350VS	0	FALSE	0	0.99	FALSE	1
1037	323.692	12	GAS3-N350VS		1	NVSLPTTK	NVSLPTTK[1037]	2	y	2	6	12	GAS3-N350VS	0	FALSE	0	0.99	FALSE	1
1062	323.692	12	GAS3-N350VS		1	NVSLPTTK	NVSLPTTK[1062]	2	y	2	6	12	GAS3-N350VS	0	FALSE	0	0.99	FALSE	1
1087	323.692	12	GAS3-N350VS		1	NVSLPTTK	NVSLPTTK[1087]	2	y	2	6	12	GAS3-N350VS	0	FALSE	0	0.99	FALSE	1
1112	323.692	12	GAS3-N350VS		1	NVSLPTTK	NVSLPTTK[1112]	2	y	2	6	12	GAS3-N350VS	0	FALSE	0	0.99	FALSE	1
1137	323.692	12	GAS3-N350VS		1	NVSLPTTK	NVSLPTTK[1137]	2	y	2	6	12	GAS3-N350VS	0	FALSE	0	0.99	FALSE	1
1162	323.692	12	GAS3-N350VS		1	NVSLPTTK	NVSLPTTK[1162]	2	y	2	6	12	GAS3-N350VS	0	FALSE	0	0.99	FALSE	1
1187	323.692	12	GAS3-N350VS		1	NVSLPTTK	NVSLPTTK[1187]	2	y	2	6	12	GAS3-N350VS	0	FALSE	0	0.99	FALSE	1
1212	323.692	12	GAS3-N350VS		1	NVSLPTTK	NVSLPTTK[1212]	2	y	2	6	12	GAS3-N350VS	0	FALSE	0	0.99	FALSE	1
1237	323.692	12	GAS3-N350VS		1	NVSLPTTK	NVSLPTTK[1237]	2	y	2	6	12	GAS3-N350VS	0	FALSE	0	0.99	FALSE	1
412.5	713.383	12	GAS3-N350VS		1	NVSLPTTK	NVSLPTTK[412]	2	b	1	7	12	GAS3-N350VS	0	FALSE	0	0.99	FALSE	1
437	713.383	12	GAS3-N350VS		1	NVSLPTTK	NVSLPTTK[437]	2	b	1	7	12	GAS3-N350VS	0	FALSE	0	0.99	FALSE	1
462	713.383	12	GAS3-N350VS		1	NVSLPTTK	NVSLPTTK[462]	2	b	1	7	12	GAS3-N350VS	0	FALSE	0	0.99	FALSE	1
487	713.383	12	GAS3-N350VS		1	NVSLPTTK	NVSLPTTK[487]	2	b	1	7	12	GAS3-N350VS	0	FALSE	0	0.99	FALSE	1
512	713.383	12	GAS3-N350VS		1	NVSLPTTK	NVSLPTTK[512]	2	b	1	7	12	GAS3-N350VS	0	FALSE	0	0.99	FALSE	1
537	713.383	12	GAS3-N350VS		1	NVSLPTTK	NVSLPTTK[537]	2	b	1	7	12	GAS3-N350VS	0	FALSE	0	0.99	FALSE	1
562	713.383	12	GAS3-N350VS		1	NVSLPTTK	NVSLPTTK[562]	2	b	1	7	12	GAS3-N350VS	0	FALSE	0	0.99	FALSE	1
587	713.383	12	GAS3-N350VS		1	NVSLPTTK	NVSLPTTK[587]	2	b	1	7	12	GAS3-N350VS	0	FALSE	0	0.99	FALSE	1
612	713.383	12	GAS3-N350VS		1	NVSLPTTK	NVSLPTTK[612]	2	b	1	7	12	GAS3-N350VS	0	FALSE	0	0.99	FALSE	1
637	713.383	12	GAS3-N350VS		1	NVSLPTTK	NVSLPTTK[637]	2	b	1	7	12	GAS3-N350VS	0	FALSE	0	0.99	FALSE	1
662	713.383	12	GAS3-N350VS		1	NVSLPTTK	NVSLPTTK[662]	2	b	1	7	12	GAS3-N350VS	0	FALSE	0	0.99	FALSE	1
687	713.383	12	GAS3-N350VS		1	NVSLPTTK	NVSLPTTK[687]	2	b	1	7	12	GAS3-N350VS	0	FALSE	0	0.99	FALSE	1
712	713.383	12	GAS3-N350VS		1	NVSLPTTK	NVSLPTTK[712]	2	b	1	7	12	GAS3-N350VS	0	FALSE	0	0.99	FALSE	1
737	713.383	12	GAS3-N350VS		1	NVSLPTTK	NVSLPTTK[737]	2	b	1	7	12	GAS3-N350VS	0	FALSE	0	0.99	FALSE	1
762	713.383	12	GAS3-N350VS		1	NVSLPTTK	NVSLPTTK[762]	2	b	1	7	12	GAS3-N350VS	0	FALSE	0	0.99	FALSE	1
787	713.383	12	GAS3-N350VS		1	NVSLPTTK	NVSLPTTK[787]	2	b	1	7	12	GAS3-N350VS	0	FALSE	0	0.99	FALSE	1
812	713.383	12	GAS3-N350VS		1	NVSLPTTK	NVSLPTTK[812]	2	b	1	7	12	GAS3-N350VS	0	FALSE	0	0.99	FALSE	1
837	713.383	12	GAS3-N350VS		1	NVSLPTTK	NVSLPTTK[837]	2	b	1	7	12	GAS3-N350VS	0	FALSE	0	0.99	FALSE	1
862	713.383	12	GAS3-N350VS		1	NVSLPTTK	NVSLPTTK[862]	2	b	1	7	12	GAS3-N350VS	0	FALSE	0	0.99	FALSE	1
887	713.383	12	GAS3-N350VS		1	NVSLPTTK	NVSLPTTK[887]	2	b	1	7	12	GAS3-N350VS	0	FALSE	0	0.99	FALSE	1
912	713.383	12	GAS3-N350VS		1	NVSLPTTK	NVSLPTTK[912]	2	b	1	7	12	GAS3-N350VS	0	FALSE	0	0.99	FALSE	1
937	713.383	12	GAS3-N350VS		1	NVSLPTTK	NVSLPTTK[937]	2	b	1	7	12	GAS3-N350VS	0	FALSE	0	0.99	FALSE	1
962	713.383	12	GAS3-N350VS		1	NVSLPTTK	NVSLPTTK[962]	2	b	1	7	12	GAS3-N350VS	0	FALSE	0	0.99	FALSE	1
987	713.383	12	GAS3-N350VS		1	NVSLPTTK	NVSLPTTK[987]	2	b	1	7	12	GAS3-N350VS	0	FALSE	0	0.99	FALSE	1
1012	713.383	12	GAS3-N350VS		1	NVSLPTTK	NVSLPTTK[1012]	2	b	1	7	12	GAS3-N350VS	0	FALSE	0	0.99	FALSE	1
1037	713.383	12	GAS3-N350VS		1	NVSLPTTK	NVSLPTTK[1037]	2	b	1	7	12	GAS3-N350VS	0	FALSE	0	0.99	FALSE	1
1062	713.383	12	GAS3-N350VS		1	NVSLPTTK	NVSLPTTK[1062]	2	b	1	7	12	GAS3-N350VS	0	FALSE	0	0.99	FALSE	1
1087	713.383	12	GAS3-N350VS		1	NVSLPTTK	NVSLPTTK[1087]	2	b	1	7	12	GAS3-N350VS	0	FALSE	0	0.99	FALSE	1
1112	713.383	12	GAS3-N350VS		1	NVSLPTTK	NVSLPTTK[1112]	2	b	1	7	12	GAS3-N350VS	0	FALSE	0	0.99	FALSE	1
1137	713.383	12	GAS3-N350VS		1	NVSLPTTK	NVSLPTTK[1137]	2	b	1	7	12	GAS3-N350VS	0	FALSE	0	0.99	FALSE	1
1162	713.383	12	GAS3-N350VS		1	NVSLPTTK	NVSLPTTK[1162]	2	b	1	7	12	GAS3-N350VS	0	FALSE	0	0.99	FALSE	1
1187	713.383	12	GAS3-N350VS		1	NVSLPTTK	NVSLPTTK[1187]	2	b	1	7	12	GAS3-N350VS	0	FALSE	0	0.99	FALSE	1
1212	713.383	12	GAS3-N350VS		1	NVSLPTTK	NVSLPTTK[1212]	2	b	1	7	12	GAS3-N350VS	0	FALSE	0	0.99	FALSE	1
1237	713.383	12	GAS3-N350VS		1	NVSLPTTK	NVSLPTTK[1237]	2	b	1	7	12	GAS3-N350VS	0	FALSE	0	0.99	FALSE	1
412.5	745.445	12	GAS3-N350VS		1	NVSLPTTK	NVSLPTTK[412]	2	y	1	7	12	GAS3-N350VS	0	FALSE	0	0.99	FALSE	1
437	745.445	12	GAS3-N350VS		1	NVSLPTTK	NVSLPTTK[437]	2	y	1	7	12	GAS3-N350VS	0	FALSE	0	0.99	FALSE	1
462	745.445	12	GAS3-N350VS		1	NVSLPTTK	NVSLPTTK[462]	2	y	1	7	12	GAS3-N350VS	0	FALSE	0	0.99	FALSE	1
487	745.445	12	GAS3-N350VS		1	NVSLPTTK	NVSLPTTK[487]	2	y	1	7	12	GAS3-N350VS	0	FALSE	0	0.99	FALSE	1
512	745.445	12	GAS3-N350VS		1	NVSLPTTK	NVSLPTTK[512]	2	y	1	7	12	GAS3-N350VS	0	FALSE	0	0.99	FALSE	1
537	745.445	12	GAS3-N350VS		1	NVSLPTTK	NVSLPTTK[537]	2	y	1	7	12	GAS3-N350VS	0	FALSE	0	0.99	FALSE	1
562	745.445	12	GAS3-N350VS		1	NVSLPTTK	NVSLPTTK[562]	2	y	1	7	12	GAS3-N350VS	0	FALSE	0	0.99	FALSE	1
587	745.445	12	GAS3-N350VS		1	NVSLPTTK	NVSLPTTK[587]	2	y	1	7	12	GAS3-N350VS	0	FALSE	0	0.99	FALSE	1
612	745.445	12	GAS3-N350VS		1	NVSLPTTK	NVSLPTTK[612]	2	y	1	7	12	GAS3-N350VS	0	FALSE	0	0.99	FALSE	1
637	745.445	12	GAS3-N350VS		1	NVSLPTTK	NVSLPTTK[637]	2	y	1	7	12	GAS3-N350VS	0	FALSE	0	0.99	FALSE	1
662	745.445	12	GAS3-N350VS		1	NVSLPTTK	NVSLPTTK[662]	2	y	1	7	12	GAS3-N350VS	0	FALSE	0	0.99	FALSE	1
687	745.445	12	GAS3-N350VS		1	NVSLPTTK	NVSLPTTK[687]	2	y	1	7	12	GAS3-N350VS	0	FALSE	0	0.99	FALSE	1
712	745.445	12	GAS3-N350VS		1	NVSLPTTK	NVSLPTTK[712]	2	y	1	7	12	GAS3-N350VS	0	FALSE	0	0.99	FALSE	1
737	745.445	12	GAS3-N350VS		1	NVSLPTTK	NVSLPTTK[737]	2	y	1	7	12	GAS3-N350VS	0	FALSE	0	0.99	FALSE	1
762	745.445	12	GAS3-N350VS		1	NVSLPTTK	NVSLPTTK[762]	2	y	1	7	12	GAS3-N350VS	0	FALSE	0	0.99	FALSE	1
787	745.445	12	GAS3-N350VS		1	NVSLPTTK	NVSLPTTK[787]	2	y	1	7	12	GAS3-N350VS	0	FALSE	0	0.99	FALSE	1
812	745.445	12	GAS3-N350VS		1	NVSLPTTK	NVSLPTTK[812]	2	y	1	7	12	GAS3-N350VS	0	FALSE	0	0.99	FALSE	1
837	745.445	12	GAS3-N350VS		1	NVSLPTTK	NVSLPTTK[837]	2	y	1	7	12	GAS3-N350VS	0	FALSE	0	0.99	FALSE	1
862	745.445	12	GAS3-N350VS		1	NVSLPTTK	NVSLPTTK[862]	2	y	1	7	12	GAS3-N350VS	0	FALSE	0	0.99	FALSE	1
887	745.445	12	GAS3-N350VS		1	NVSLPTTK	NVSLPTTK[887]	2	y	1	7	12	GAS3-N350VS	0	FALSE	0	0.99	FALSE	1
912	745.445	12	GAS3-N350VS		1	NVSLPTTK	NVSLPTTK[912]	2	y	1	7	12	GAS3-N350VS	0	FALSE	0	0.99	FALSE	1
937	745.445	12	GAS3-N350VS		1	NVSLPTTK	NVSLPTTK[937]	2	y	1	7	12	GAS3-N350VS	0	FALSE	0	0.99	FALSE	1
962	745.445	12	GAS3-N350VS		1	NVSLPTTK	NVSLPTTK[962]	2	y	1	7	12	GAS3-N350VS	0	FALSE	0	0.99	FALSE	1
987	745.445	12	GAS3-N350VS		1	NVSLPTTK	NVSLPTTK[987]	2	y	1	7	12	GAS3-N350VS	0	FALSE	0	0.99	FALSE	1
1012	745.445	12	GAS3-N350VS		1	NVSLPTTK	NVSLPTTK[1012]	2	y	1	7	12	GAS3-N350VS	0	FALSE	0	0.99	FALSE	1
1037	745.445	12	GAS3-N350VS		1	NVSLPTTK	NVSLPTTK[1037]	2	y	1	7	12	GAS3-N350VS	0	FALSE	0	0.99	FALSE	1
1062	745.445	12	GAS3-N350VS		1	NVSLPTTK	NVSLPTTK[1062]	2	y	1	7	12	GAS3-N350VS	0	FALSE	0	0.99	FALSE	1
1087	745.445	12	GAS3-N350VS		1	NVSLPTTK	NVSLPTTK[1087]	2	y	1	7	12	GAS3-N350VS	0	FALSE	0	0.99	FALSE	1
1112	745.445	12	GAS3-N350VS		1	NVSLPTTK	NVSLPTTK[1112]	2	y	1	7	12	GAS3-N350VS	0	FALSE	0	0.99	FALSE	1
1137	745.445	12	GAS3-N350VS		1	NVSLPTTK	NVSLPTTK[1137]	2	y	1	7	12	GAS3-N350VS	0	FALSE	0	0.99	FALSE	1
1162	745.445	12	GAS3-N350VS		1	NVSLPTTK	NVSLPTTK[1162]	2	y	1	7	12	GAS3-N350VS	0	FALSE	0	0.99	FALSE	1
1187	745.445	12	GAS3-N350VS		1	NVSLPTTK	NVSLPTTK[1187]	2	y	1	7	12	GAS3-N350VS	0	FALSE	0	0.99	FALSE	1
1212	745.445	12	GAS3-N350VS		1	NVSLPTTK	NVSLPTTK[1212]	2	y	1	7	12	GAS3-N350VS	0	FALSE	0	0.99	FALSE	1
1237	745.445	12	GAS3-N350VS		1	NVSLPTTK	NVSLPTTK[1237]	2	y	1	7	12	GAS3-N350VS	0	FALSE	0	0.99	FALSE	1
412.5	357.195	12	GAS3-N350VS		1	NVSLPTTK	NVSLPTTK[412]	2	b	2	7	12	GAS3-N350VS	0	FALSE	0	0.99	FALSE	1
437	357.195	12	GAS3-N350VS		1	NVSLPTTK	NVSLPTTK[437]	2	b	2	7	12	GAS3-N350VS	0	FALSE	0	0.99	FALSE	1
462	357.195	12	GAS3-N350VS		1	NVSLPTTK	NVSLPTTK[462]	2	b	2	7	12	GAS3-N350VS	0	FALSE	0	0.99	FALSE	1
487	357.195	12	GAS3-N350VS		1	NVSLPTTK	NVSLPTTK[487]	2	b	2	7	12	GAS3-N350VS	0	FALSE	0	0.99	FALSE	1
512	357.195	12	GAS3-N350VS		1	NVSLPTTK	NVSLPTTK[512]	2	b	2	7	12	GAS3-N350VS	0	FALSE	0	0.99	FALSE	1
537	357.195	12	GAS3-N350VS		1	NVSLPTTK	NVSLPTTK[537]	2	b	2	7	12	GAS3-N350VS	0	FALSE	0	0.99	FALSE	1
562	357.195	12	GAS3-N350VS		1	NVSLPTTK	NVSLPTTK[562]	2	b	2	7	12	GAS3-N350VS	0	FALSE	0	0.99	FALSE	1
587	357.195	12	GAS3-N350VS		1	NVSLPTTK	NVSLPTTK[587]	2	b	2	7	12	GAS3-N350VS	0	FALSE	0	0.99	FALSE	1
612	357.195	12	GAS3-N350VS		1	NVSLPTTK	NVSLPTTK[612]	2	b	2	7	12	GAS3-N350VS	0	FALSE	0	0.99	FALSE	1
637	357.195	12	GAS3-N350VS		1	NVSLPTTK	NVSLPTTK[637]	2	b	2	7	12	GAS3-N350VS	0	FALSE	0	0.99	FALSE	1
662	357.195	12	GAS3-N350VS		1	NVSLPTTK	NVSLPTTK[662]	2	b	2	7	12	GAS3-N350VS	0	FALSE	0	0.99	FALSE	1
687	357.195	12	GAS3-N350VS		1	NVSLPTTK	NVSLPTTK[687]	2	b	2	7	12	GAS3-N350VS	0	FALSE	0	0.99	FALSE	1
712	357.195	12	GAS3-N350VS		1	NVSLPTTK	NVSLPTTK[712]	2	b	2	7	12	GAS3-N350VS	0	FALSE	0	0.99	FALSE	1
737	357.195	12	GAS3-N350VS		1	NVSLPTTK	NVSLPTTK[737]	2	b	2	7	12	GAS3-N350VS	0	FALSE	0	0.99	FALSE	1
762	357.195	12	GAS3-N350VS		1	NVSLPTTK	NVSLPTTK[762]	2	b	2	7	12	GAS3-N350VS	0	FALSE	0	0.99	FALSE	1
787	357.195	12	GAS3-N350VS		1	NVSLPTTK	NVSLPTTK[787]	2	b	2	7	12	GAS3-N350VS	0	FALSE	0	0.99	FALSE	1
812	357.195	12	GAS3-N350VS		1	NVSLPTTK	NVSLPTTK[812]	2	b	2	7	12	GAS3-N350VS	0	FALSE	0	0.99	FALSE	1
837	357.195	12	GAS3-N350VS		1	NVSLPTTK	NVSLPTTK[837]	2	b	2	7	12	GAS3-N350VS	0	FALSE	0	0.99	FALSE	1
862	357.195	12	GAS3-N350VS		1	NVSLPTTK	NVSLPTTK[862]	2	b	2	7	12	GAS3-N350VS	0	FALSE	0	0.99	FALSE	1
887	357.195	12	GAS3-N350VS		1	NVSLPTTK	NVSLPTTK[887]	2	b	2	7	12	GAS3-N350VS	0	FALSE	0	0.99	FALSE	1
912	357.195	12	GAS3-N350VS		1	NVSLPTTK	NVSLPTTK[912]	2	b	2	7	12	GAS3-N350VS	0	FALSE	0	0.99	FALSE	1
937	357.195	12	GAS3-N350VS		1	NVSLPTTK	NVSLPTTK[937]	2	b	2	7	12	GAS3-N350VS	0	FALSE	0	0.99	FALSE	1
962	357.195	12	GAS3-N350VS		1	NVSLPTTK	NVSLPTTK[962]	2	b	2	7	12	GAS3-N350VS	0	FALSE	0	0.99	FALSE	1
987	357.195	12	GAS3-N350VS		1	NVSLPTTK	NVSLPTTK[987]	2	b	2	7	12	GAS3-N350VS	0	FALSE	0	0.99	FALSE	1
1012	357.195	12	GAS3-N350VS		1	NVSLPTTK	NVSLPTTK[1012]	2	b	2	7	12	GAS3-N350VS	0	FALSE	0	0.99	FALSE	1
1037	357.195	12	GAS3-N350VS		1	NVSLPTTK	NVSLPTTK[1037]	2	b	2	7	12	GAS3-N350VS	0	FALSE	0	0.99	FALSE	1
1062	357.195	12	GAS3-N350VS		1	NVSLPTTK	NVSLPTTK[1062]	2	b	2	7	12	GAS3-N350VS	0	FALSE	0	0.99	FALSE	1
1087	357.195	12	GAS3-N350VS		1	NVSLPTTK	NVSLPTTK[1087]	2	b	2	7	12	GAS3-N350VS	0	FALSE	0	0.99	FALSE	1
1112	357.195	12	GAS3-N350VS		1	NVSLPTTK	NVSLPTTK[1112]	2	b	2	7	12	GAS3-N350VS	0	FALSE	0	0.99	FALSE	1
1137	357.195	12	GAS3-N350VS		1	NVSLPTTK	NVSLPTTK[1137]	2	b	2	7	12	GAS3-N350VS	0	FALSE	0	0.99	FALSE	1
1162	357.195	12	GAS3-N350VS		1	NVSLPTTK	NVSLPTTK[1162]	2	b	2	7	12	GAS3-N350VS	0	FALSE	0	0.99	FALSE	1
1187	357.195	12	GAS3-N350VS		1	NVSLPTTK	NVSLPTTK[1187]	2	b	2	7	12	GAS3-N350VS	0	FALSE	0	0.99	FALSE	1
1212	357.195	12	GAS3-N350VS		1	NVSLPTTK	NVSLPTTK[1212]	2	b	2	7	12	GAS3-N350VS	0	FALSE	0	0.99	FALSE	1
1237	357.195	12	GAS3-N350VS		1	NVSLPTTK	NVSLPTTK[1237]	2	b	2	7	12	GAS3-N350VS	0	FALSE	0	0.99	FALSE	1
412.5	373.226	12	GAS3-N350VS		1	NVSLPTTK	NVSLPTTK[412]	2	y	2	7	12	GAS3-N350VS	0	FALSE	0	0.99	FALSE	1
437	373.226	12	GAS3-N350VS		1	NVSLPTTK	NVSLPTTK[437]	2	y	2	7	12	GAS3-N350VS	0	FALSE	0	0.99	FALSE	1
462	373.226	12	GAS3-N350VS		1	NVSLPTTK	NVSLPTTK[462]	2	y	2	7	12	GAS3-N350VS	0	FALSE	0	0.99	FALSE	1
487	373.226	12	GAS3-N350VS		1	NVSLPTTK	NVSLPTTK[487]	2	y	2	7	12	GAS3-N350VS	0	FALSE	0	0.99	FALSE	1
512	373.226	12	GAS3-N350VS		1	NVSLPTTK	NVSLPTTK[512]	2	y	2	7	12	GAS3-N350VS	0	FALSE	0	0.99	FALSE	1
537	373.226	12	GAS3-N350VS		1	NVSLPTTK	NVSLPTTK[537]	2	y	2	7	12	GAS3-N350VS	0	FALSE	0	0.99	FALSE	1
562	373.226	12	GAS3-N350VS		1	NVSLPTTK	NVSLPTTK[562]	2	y	2	7	12	GAS3-N350VS	0	FALSE	0	0.99	FALSE	1
587	373.226	12	GAS3-N350VS		1	NVSLPTTK	NVSLPTTK[587]	2	y	2	7	12	GAS3-N350VS	0	FALSE	0	0.99	FALSE	1
612	373.226	12	GAS3-N350VS		1	NVSLPTTK	NVSLPTTK[612]	2	y	2	7	12	GAS3-N350VS	0	FALSE	0	0.99	FALSE	1
637	373.226	12	GAS3-N350VS		1	NVSLPTTK	NVSLPTTK[637]	2	y	2	7	12	GAS3-N350VS	0	FALSE	0	0.99	FALSE	1
662	373.226	12	GAS3-N350VS		1	NVSLPTTK	NVSLPTTK[662]	2	y	2	7	12	GAS3-N350VS	0	FALSE	0	0.99	FALSE	1
687	373.226	12	GAS3-N350VS		1	NVSLPTTK	NVSLPTTK[687]	2	y	2	7	12	GAS3-N350VS	0	FALSE	0	0.99	FALSE	1
712	373.226	12	GAS3-N350VS		1	NVSLPTTK	NVSLPTTK[712]	2	y	2	7	12	GAS3-N350VS	0	FALSE	0	0.99	FALSE	1
737	373.226	12	GAS3-N350VS		1	NVSLPTTK	NVSLPTTK[737]	2	y	2	7	12	GAS3-N350VS	0	FALSE	0	0.99	FALSE	1
762	373.226	12	GAS3-N350VS		1	NVSLPTTK	NVSLPTTK[762]	2	y	2	7	12	GAS3-N350VS	0	FALSE	0	0.99	FALSE	1
787	373.226	12	GAS3-N350VS		1	NVSLPTTK	NVSLPTTK[787]	2	y	2	7	12	GAS3-N350VS	0	FALSE	0	0.99	FALSE	1
812	373.226	12	GAS3-N350VS		1	NVSLPTTK	NVSLPTTK[812]	2	y	2	7	12	GAS3-N350VS	0	FALSE	0	0.99	FALSE	1
837	373.226	12	GAS3-N350VS		1	NVSLPTTK	NVSLPTTK[837]	2	y	2	7	12	GAS3-N350VS	0	FALSE	0	0.99	FALSE	1
862	373.226	12	GAS3-N350VS		1	NVSLPTTK	NVSLPTTK[862]	2	y	2	7	12	GAS3-N350VS	0	FALSE	0	0.99	FALSE	1
887	373.226	12	GAS3-N350VS		1	NVSLPTTK	NVSLPTTK[887]	2	y	2	7	12	GAS3-N350VS	0	FALSE	0	0.99	FALSE	1
912	373.226	12	GAS3-N350VS		1	NVSLPTTK	NVSLPTTK[912]	2	y	2	7	12	GAS3-N350VS	0	FALSE	0	0.99	FALSE	1
937	373.226	12	GAS3-N350VS		1	NVSLPTTK	NVSLPTTK[937]	2	y	2	7	12	GAS3-N350VS	0	FALSE	0	0.99	FALSE	1
962	373.226	12	GAS3-N350VS		1	NVSLPTTK	NVSLPTTK[962]	2	y	2	7	12	GAS3-N350VS	0	FALSE	0	0.99	FALSE	1
987	373.226	12	GAS3-N350VS		1	NVSLPTTK	NVSLPTTK[987]	2	y	2	7	12	GAS3-N350VS	0	FALSE	0	0.99	FALSE	1
1012	373.226	12	GAS3-N350VS		1	NVSLPTTK	NVSLPTTK[1012]	2	y	2	7	12	GAS3-N350VS	0	FALSE	0	0.99	FALSE	1
1037	373.226	12	GAS3-N350VS		1	NVSLPTTK	NVSLPTTK[1037]	2	y	2	7	12	GAS3-N350VS	0	FALSE	0	0.99	FALSE	1
1062	373.226	12	GAS3-N350VS		1	NVSLPTTK	NVSLPTTK[1062]	2	y	2	7	12	GAS3-N350VS	0	FALSE	0	0.99	FALSE	1
1087	373.226	12	GAS3-N350VS		1	NVSLPTTK	NVSLPTTK[1087]	2	y	2	7	12	GAS3-N350VS	0	FALSE	0	0.99	FALSE	1
1112	373.226	12	GAS3-N350VS		1	NVSLPTTK	NVSLPTTK[1112]	2	y	2	7	12	GAS3-N350VS	0	FALSE	0	0.99	FALSE	1
1137	373.226	12	GAS3-N350VS		1	NVSLPTTK	NVSLPTTK[1137]	2	y	2	7	12	GAS3-N350VS	0	FALSE	0	0.99	FALSE	1
1162	373.226	12	GAS3-N350VS		1	NVSLPTTK	NVSLPTTK[1162]	2	y	2	7	12	GAS3-N350VS	0	FALSE	0	0.99	FALSE	1
1187	373.226	12	GAS3-N350VS		1	NVSLPTTK	NVSLPTTK[1187]	2	y	2	7	12	GAS3-N350VS	0	FALSE	0	0.99	FALSE	1
1212	373.226	12	GAS3-N350VS		1	NVSLPTTK	NVSLPTTK[1212]	2	y	2	7	12	GAS3-N350VS	0	FALSE	0	0.99	FALSE	1
1237	373.226	12	GAS3-N350VS		1	NVSLPTTK	NVSLPTTK[1237]	2	y	2	7	12	GAS3-N350VS	0	FALSE	0	0.99	FALSE	1
412.5	859.488	12	GAS3-N350VS		1	NVSLPTTK	NVSLPTTK[412]	2	y	1	8	12	GAS3-N350VS	0	FALSE	0	0.99	FALSE	1
437	859.488	12	GAS3-N350VS		1	NVSLPTTK	NVSLPTTK[437]	2	y	1	8	12	GAS3-N350VS	0	FALSE	0	0.99	FALSE	1
462	859.488	12	GAS3-N350VS		1	NVSLPTTK	NVSLPTTK[462]	2	y	1	8	12	GAS3-N350VS	0	FALSE	0	0.99	FALSE	1
487	859.488	12	GAS3-N350VS		1	NVSLPTTK	NVSLPTTK[487]	2	y	1	8	12	GAS3-N350VS	0	FALSE	0	0.99	FALSE	1
512	859.488	12	GAS3-N350VS		1	NVSLPTTK	NVSLPTTK[512]	2	y	1	8	12	GAS3-N350VS	0	FALSE	0	0.99	FALSE	1
537	859.488	12	GAS3-N350VS		1	NVSLPTTK	NVSLPTTK[537]	2	y	1	8	12	GAS3-N350VS	0	FALSE	0	0.99	FALSE	1
562	859.488	12	GAS3-N350VS		1	NVSLPTTK	NVSLPTTK[562]	2	y	1	8	12	GAS3-N350VS	0	FALSE	0	0.99	FALSE	1
587	859.488	12	GAS3-N350VS		1	NVSLPTTK	NVSLPTTK[587]	2	y	1	8	12	GAS3-N350VS	0	FALSE	0	0.99	FALSE	1
612	859.488	12	GAS3-N350VS		1	NVSLPTTK	NVSLPTTK[612]	2	y	1	8	12	GAS3-N350VS	0	FALSE	0	0.99	FALSE	1
637	859.488	12	GAS3-N350VS		1	NVSLPTTK	NVSLPTTK[637]	2	y	1	8	12	GAS3-N350VS	0	FALSE	0	0.99	FALSE	1
662	859.488	12	GAS3-N350VS		1	NVSLPTTK	NVSLPTTK[662]	2	y	1	8	12	GAS3-N350VS	0	FALSE	0	0.99	FALSE	1
687	859.488	12	GAS3-N350VS		1	NVSLPTTK	NVSLPTTK[687]	2	y	1	8	12	GAS3-N350VS	0	FALSE	0	0.99	FALSE	1
712	859.488	12	GAS3-N350VS		1	NVSLPTTK	NVSLPTTK[712]	2	y	1	8	12	GAS3-N350VS	0	FALSE	0	0.99	FALSE	1
737	859.488	12	GAS3-N350VS		1	NVSLPTTK	NVSLPTTK[737]	2	y	1	8	12	GAS3-N350VS	0	FALSE	0	0.99	FALSE	1
762	859.488	12	GAS3-N350VS		1	NVSLPTTK	NVSLPTTK[762]	2	y	1	8	12	GAS3-N350VS	0	FALSE	0	0.99	FALSE	1
787	859.488	12	GAS3-N350VS		1	NVSLPTTK	NVSLPTTK[787]	2	y	1	8	12	GAS3-N350VS	0	FALSE	0	0.99	FALSE	1
812	859.488	12	GAS3-N350VS		1	NVSLPTTK	NVSLPTTK[812]	2	y	1	8	12	GAS3-N350VS	0	FALSE	0	0.99	FALSE	1
837	859.488	12	GAS3-N350VS		1	NVSLPTTK	NVSLPTTK[837]	2	y	1	8	12	GAS3-N350VS	0	FALSE	0	0.99	FALSE	1
862	859.488	12	GAS3-N350VS		1	NVSLPTTK	NVSLPTTK[862]	2	y	1	8	12	GAS3-N350VS	0	FALSE	0	0.99	FALSE	1
887	859.488	12	GAS3-N350VS		1	NVSLPTTK	NVSLPTTK[887]	2	y	1	8	12	GAS3-N350VS	0	FALSE	0	0.99	FALSE	1
912	859.488	12	GAS3-N350VS		1	NVSLPTTK	NVSLPTTK[912]	2	y	1	8	12	GAS3-N350VS	0	FALSE	0	0.99	FALSE	1
937	859.488	12	GAS3-N350VS		1	NVSLPTTK	NVSLPTTK[937]	2	y	1	8	12	GAS3-N350VS	0	FALSE	0	0.99	FALSE	1
962	859.488	12	GAS3-N350VS		1	NVSLPTTK	NVSLPTTK[962]	2	y	1	8	12	GAS3-N350VS	0	FALSE	0	0.99	FALSE	1
987	859.488	12	GAS3-N350VS		1	NVSLPTTK	NVSLPTTK[987]	2	y	1	8	12	GAS3-N350VS	0	FALSE	0	0.99	FALSE	1
1012	859.488	12	GAS3-N350VS		1	NVSLPTTK	NVSLPTTK[1012]	2	y	1	8	12	GAS3-N350VS	0	FALSE	0	0.99	FALSE	1
1037	859.488	12	GAS3-N350VS		1	NVSLPTTK	NVSLPTTK[1037]	2	y	1	8	12	GAS3-N350VS	0	FALSE	0	0.99	FALSE	1
1062	859.488	12	GAS3-N350VS		1	NVSLPTTK	NVSLPTTK[1062]	2	y	1	8	12	GAS3-N350VS	0	FALSE	0	0.99	FALSE	1
1087	859.488	12	GAS3-N350VS		1	NVSLPTTK	NVSLPTTK[1087]	2	y	1	8	12	GAS3-N350VS	0	FALSE	0	0.99	FALSE	1
1112	859.488	12	GAS3-N350VS		1	NVSLPTTK	NVSLPTTK[1112]	2	y	1	8	12	GAS3-N350VS	0	FALSE	0	0.99	FALSE	1
1137	859.488	12	GAS3-N350VS		1	NVSLPTTK	NVSLPTTK[1137]	2	y	1	8	12	GAS3-N350VS	0	FALSE	0	0.99	FALSE	1
1162	859.488	12	GAS3-N350VS		1	NVSLPTTK	NVSLPTTK[1162]	2	y	1	8	12	GAS3-N350VS	0	FALSE	0	0.99	FALSE	1
1187	859.488	12	GAS3-N350VS		1	NVSLPTTK	NVSLPTTK[1187]	2	y	1	8	12	GAS3-N350VS	0	FALSE	0	0.99	FALSE	1
1212	859.488	12	GAS3-N350VS		1	NVSLPTTK	NVSLPTTK[1212]	2	y	1	8	12	GAS3-N350VS	0	FALSE	0	0.99	FALSE	1
1237	859.488	12	GAS3-N350VS		1	NVSLPTTK	NVSLPTTK[1237]	2	y	1	8	12	GAS3-N350VS	0	FALSE	0	0.99	FALSE	1
412.5	430.248	12	GAS3-N350VS		1	NVSLPTTK	NVSLPTTK[412]	2	y	2	8	12	GAS3-N350VS	0	FALSE	0	0.99	FALSE	1
437	430.248	12	GAS3-N350VS		1	NVSLPTTK	NVSLPTTK[437]	2	y	2	8	12	GAS3-N350VS	0	FALSE	0	0.99	FALSE	1
462	430.248	12	GAS3-N350VS		1	NVSLPTTK	NVSLPTTK[462]	2	y	2	8	12	GAS3-N350VS	0	FALSE	0	0.99	FALSE	1
487	430.248	12	GAS3-N350VS		1	NVSLPTTK	NVSLPTTK[487]	2	y	2	8	12	GAS3-N350VS	0	FALSE	0	0.99	FALSE	1
512	430.248	12	GAS3-N350VS		1	NVSLPTTK	NVSLPTTK[512]	2	y	2	8	12	GAS3-N350VS	0	FALSE	0	0.99	FALSE	1
537	430.248	12	GAS3-N350VS		1	NVSLPTTK	NVSLPTTK[537]	2	y	2	8	12	GAS3-N350VS	0	FALSE	0	0.99	FALSE	1
562	430.248	12	GAS3-N350VS		1	NVSLPTTK	NVSLPTTK[562]	2	y	2	8	12	GAS3-N350VS	0	FALSE	0	0.99	FALSE	1
587	430.248	12	GAS3-N350VS		1	NVSLPTTK	NVSLPTTK[587]	2	y	2	8	12	GAS3-N350VS	0	FALSE	0	0.99	FALSE	1
612	430.248	12	GAS3-N350VS		1	NVSLPTTK	NVSLPTTK[612]	2	y	2	8	12	GAS3-N350VS	0	FALSE	0	0.99	FALSE	1
637	430.248	12	GAS3-N350VS		1	NVSLPTTK	NVSLPTTK[637]	2	y	2	8	12	GAS3-N350VS	0	FALSE	0	0.99	FALSE	1
662	430.248	12	GAS3-N350VS		1	NVSLPTTK	NVSLPTTK[662]	2	y	2	8	12	GAS3-N350VS	0	FALSE	0	0.99	FALSE	1
687	430.248	12	GAS3-N350VS		1	NVSLPTTK	NVSLPTTK[687]	2	y	2	8	12	GAS3-N350VS	0	FALSE	0	0.99	FALSE	1
712	430.248	12	GAS3-N350VS		1	NVSLPTTK	NVSLPTTK[712]	2	y	2	8	12	GAS3-N350VS	0	FALSE	0	0.99	FALSE	1
737	430.248	12	GAS3-N350VS		1	NVSLPTTK	NVSLPTTK[737]	2	y	2	8	12	GAS3-N350VS	0	FALSE	0	0.99	FALSE	1
762	430.248	12	GAS3-N350VS		1	NVSLPTTK	NVSLPTTK[762]	2	y	2	8	12	GAS3-N350VS	0	FALSE	0	0.99	FALSE	1
787	430.248	12	GAS3-N350VS		1	NVSLPTTK	NVSLPTTK[787]	2	y	2	8	12	GAS3-N350VS	0	FALSE	0	0.99	FALSE	1
812	430.248	12	GAS3-N350VS		1	NVSLPTTK	NVSLPTTK[812]	2	y	2	8	12	GAS3-N350VS	0	FALSE	0	0.99	FALSE	1
837	430.248	12	GAS3-N350VS		1	NVSLPTTK	NVSLPTTK[837]	2	y	2	8	12	GAS3-N350VS	0	FALSE	0	0.99	FALSE	1
862	430.248	12	GAS3-N350VS		1	NVSLPTTK	NVSLPTTK[862]	2	y	2	8	12	GAS3-N350VS	0	FALSE	0	0.99	FALSE	1
887	430.248	12	GAS3-N350VS		1	NVSLPTTK	NVSLPTTK[887]	2	y	2	8	12	GAS3-N350VS	0	FALSE	0	0.99	FALSE	1
912	430.248	12	GAS3-N350VS		1	NVSLPTTK	NVSLPTTK[912]	2	y	2	8	12	GAS3-N350VS	0	FALSE	0	0.99	FALSE	1
937	430.248	12	GAS3-N350VS		1	NVSLPTTK	NVSLPTTK[937]	2	y	2	8	12	GAS3-N350VS	0	FALSE	0	0.99	FALSE	1
962	430.248	12	GAS3-N350VS		1	NVSLPTTK	NVSLPTTK[962]	2	y	2	8	12	GAS3-N350VS	0	FALSE	0	0.99	FALSE	1
987	430.248	12	GAS3-N350VS		1	NVSLPTTK	NVSLPTTK[987]	2	y	2	8	12	GAS3-N350VS	0	FALSE	0	0.99	FALSE	1
1012	430.248	12	GAS3-N350VS		1	NVSLPTTK	NVSLPTTK[1012]	2	y	2	8	12	GAS3-N350VS	0	FALSE	0	0.99	FALSE	1
1037	430.248	12	GAS3-N350VS		1	NVSLPTTK	NVSLPTTK[1037]	2	y	2	8	12	GAS3-N350VS	0	FALSE	0	0.99	FALSE	1
1062	430.248	12	GAS3-N350VS		1	NVSLPTTK	NVSLPTTK[1062]	2	y	2	8	12	GAS3-N350VS	0	FALSE	0	0.99	FALSE	1
1087	430.248	12	GAS3-N350VS		1	NVSLPTTK	NVSLPTTK[1087]	2	y	2	8	12	GAS3-N350VS	0	FALSE	0	0.99	FALSE	1
1112	430.248	12	GAS3-N350VS		1	NVSLPTTK	NVSLPTTK[1112]	2	y	2	8	12	GAS3-N350VS	0	FALSE	0	0.99	FALSE	1
1137	430.248	12	GAS3-N350VS		1	NVSLPTTK	NVSLPTTK[1137]	2	y	2	8	12	GAS3-N350VS	0	FALSE	0	0.99	FALSE	1
1162	430.248	12	GAS3-N350VS		1	NVSLPTTK	NVSLPTTK[1162]	2	y	2	8	12	GAS3-N350VS	0	FALSE	0	0.99	FALSE	1
1187	430.248	12	GAS3-N350VS		1	NVSLPTTK	NVSLPTTK[1187]	2	y	2	8	12	GAS3-N350VS	0	FALSE	0	0.99	FALSE	1
1212	430.248	12	GAS3-N350VS		1	NVSLPTTK	NVSLPTTK[1212]	2	y	2	8	12	GAS3-N350VS	0	FALSE	0	0.99	FALSE	1
1237	430.248	12	GAS3-N350VS		1	NVSLPTTK	NVSLPTTK[1237]	2	y	2	8	12	GAS3-N350VS	0	FALSE	0	0.99	FALSE	1
412.5	285.135	12	CRH1-N177YT		1	FHNYTLDWAMDK	FHNYTLDWAMDK[412]	2	b	1	2	12	CRH1-N177YT	0	FALSE	0	0.99	FALSE	1
437	285.135	12	CRH1-N177YT		1	FHNYTLDWAMDK	FHNYTLDWAMDK[437]	2	b	1	2	12	CRH1-N177YT	0	FALSE	0	0.99	FALSE	1
462	285.135	12	CRH1-N177YT		1	FHNYTLDWAMDK	FHNYTLDWAMDK[462]	2	b	1	2	12	CRH1-N177YT	0	FALSE	0	0.99	FALSE	1
487	285.135	12	CRH1-N177YT		1	FHNYTLDWAMDK	FHNYTLDWAMDK[487]	2	b	1	2	12	CRH1-N177YT	0	FALSE	0	0.99	FALSE	1
512	285.135	12	CRH1-N177YT		1	FHNYTLDWAMDK	FHNYTLDWAMDK[512]	2	b	1	2	12	CRH1-N177YT	0	FALSE	0	0.99	FALSE	1
537	285.135	12	CRH1-N177YT		1	FHNYTLDWAMDK	FHNYTLDWAMDK[537]	2	b	1	2	12	CRH1-N177YT	0	FALSE	0	0.99	FALSE	1
562	285.135	12	CRH1-N177YT		1	FHNYTLDWAMDK	FHNYTLDWAMDK[562]	2	b	1	2	12	CRH1-N177YT	0	FALSE	0	0.99	FALSE	1
587	285.135	12	CRH1-N177YT		1	FHNYTLDWAMDK	FHNYTLDWAMDK[587]	2	b	1	2	12	CRH1-N177YT	0	FALSE	0	0.99	FALSE	1
612	285.135	12	CRH1-N177YT		1	FHNYTLDWAMDK	FHNYTLDWAMDK[612]	2	b	1	2	12	CRH1-N177YT	0	FALSE	0	0.99	FALSE	1
637	285.135	12	CRH1-N177YT		1	FHNYTLDWAMDK	FHNYTLDWAMDK[637]	2	b	1	2	12	CRH1-N177YT	0	FALSE	0	0.99	FALSE	1
662	285.135	12	CRH1-N177YT		1	FHNYTLDWAMDK	FHNYTLDWAMDK[662]	2	b	1	2	12	CRH1-N177YT	0	FALSE	0	0.99	FALSE	1
687	285.135	12	CRH1-N177YT		1	FHNYTLDWAMDK	FHNYTLDWAMDK[687]	2	b	1	2	12	CRH1-N177YT	0	FALSE	0	0.99	FALSE	1
712	285.135	12	CRH1-N177YT		1	FHNYTLDWAMDK	FHNYTLDWAMDK[712]	2	b	1	2	12	CRH1-N177YT	0	FALSE	0	0.99	FALSE	1
737	285.135	12	CRH1-N177YT		1	FHNYTLDWAMDK	FHNYTLDWAMDK[737]	2	b	1	2	12	CRH1-N177YT	0	FALSE	0	0.99	FALSE	1
762	285.135	12	CRH1-N177YT		1	FHNYTLDWAMDK	FHNYTLDWAMDK[762]	2	b	1	2	12	CRH1-N177YT	0	FALSE	0	0.99	FALSE	1
787	285.135	12	CRH1-N177YT		1	FHNYTLDWAMDK	FHNYTLDWAMDK[787]	2	b	1	2	12	CRH1-N177YT	0	FALSE	0	0.99	FALSE	1
812	285.135	12	CRH1-N177YT		1	FHNYTLDWAMDK	FHNYTLDWAMDK[812]	2	b	1	2	12	CRH1-N177YT	0	FALSE	0	0.99	FALSE	1
837	285.135	12	CRH1-N177YT		1	FHNYTLDWAMDK	FHNYTLDWAMDK[837]	2	b	1	2	12	CRH1-N177YT	0	FALSE	0	0.99	FALSE	1
862	285.135	12	CRH1-N177YT		1	FHNYTLDWAMDK	FHNYTLDWAMDK[862]	2	b	1	2	12	CRH1-N177YT	0	FALSE	0	0.99	FALSE	1
887	285.135	12	CRH1-N177YT		1	FHNYTLDWAMDK	FHNYTLDWAMDK[887]	2	b	1	2	12	CRH1-N177YT	0	FALSE	0	0.99	FALSE	1
912	285.135	12	CRH1-N177YT		1	FHNYTLDWAMDK	FHNYTLDWAMDK[912]	2	b	1	2	12	CRH1-N177YT	0	FALSE	0	0.99	FALSE	1
937	285.135	12	CRH1-N177YT		1	FHNYTLDWAMDK	FHNYTLDWAMDK[937]	2	b	1	2	12	CRH1-N177YT	0	FALSE	0	0.99	FALSE	1
962	285.135	12	CRH1-N177YT		1	FHNYTLDWAMDK	FHNYTLDWAMDK[962]	2	b	1	2	12	CRH1-N177YT	0	FALSE	0	0.99	FALSE	1
987	285.135	12	CRH1-N177YT		1	FHNYTLDWAMDK	FHNYTLDWAMDK[987]	2	b	1	2	12	CRH1-N177YT	0	FALSE	0	0.99	FALSE	1
1012	285.135	12	CRH1-N177YT		1	FHNYTLDWAMDK	FHNYTLDWAMDK[1012]	2	b	1	2	12	CRH1-N177YT	0	FALSE	0	0.99	FALSE	1
1037	285.135	12	CRH1-N177YT		1	FHNYTLDWAMDK	FHNYTLDWAMDK[1037]	2	b	1	2	12	CRH1-N177YT	0	FALSE	0	0.99	FALSE	1
1062	285.135	12	CRH1-N177YT		1	FHNYTLDWAMDK	FHNYTLDWAMDK[1062]	2	b	1	2	12	CRH1-N177YT	0	FALSE	0	0.99	FALSE	1
1087	285.135	12	CRH1-N177YT		1	FHNYTLDWAMDK	FHNYTLDWAMDK[1087]	2	b	1	2	12	CRH1-N177YT	0	FALSE	0	0.99	FALSE	1
1112	285.135	12	CRH1-N177YT		1	FHNYTLDWAMDK	FHNYTLDWAMDK[1112]	2	b	1	2	12	CRH1-N177YT	0	FALSE	0	0.99	FALSE	1
1137	285.135	12	CRH1-N177YT		1	FHNYTLDWAMDK	FHNYTLDWAMDK[1137]	2	b	1	2	12	CRH1-N177YT	0	FALSE	0	0.99	FALSE	1
1162	285.135	12	CRH1-N177YT		1	FHNYTLDWAMDK	FHNYTLDWAMDK[1162]	2	b	1	2	12	CRH1-N177YT	0	FALSE	0	0.99	FALSE	1
1187	285.135	12	CRH1-N177YT		1	FHNYTLDWAMDK	FHNYTLDWAMDK[1187]	2	b	1	2	12	CRH1-N177YT	0	FALSE	0	0.99	FALSE	1
1212	285.135	12	CRH1-N177YT		1	FHNYTLDWAMDK	FHNYTLDWAMDK[1212]	2	b	1	2	12	CRH1-N177YT	0	FALSE	0	0.99	FALSE	1
1237	285.135	12	CRH1-N177YT		1	FHNYTLDWAMDK	FHNYTLDWAMDK[1237]	2	b	1	2	12	CRH1-N177YT	0	FALSE	0	0.99	FALSE	1
412.5	262.14	12	CRH1-N177YT		1	FHNYTLDWAMDK	FHNYTLDWAMDK[412]	2	y	1	2	12	CRH1-N177YT	0	FALSE	0	0.99	FALSE	1
437	262.14	12	CRH1-N177YT		1	FHNYTLDWAMDK	FHNYTLDWAMDK[437]	2	y	1	2	12	CRH1-N177YT	0	FALSE	0	0.99	FALSE	1
462	262.14	12	CRH1-N177YT		1	FHNYTLDWAMDK	FHNYTLDWAMDK[462]	2	y	1	2	12	CRH1-N177YT	0	FALSE	0	0.99	FALSE	1
487	262.14	12	CRH1-N177YT		1	FHNYTLDWAMDK	FHNYTLDWAMDK[487]	2	y	1	2	12	CRH1-N177YT	0	FALSE	0	0.99	FALSE	1
512	262.14	12	CRH1-N177YT		1	FHNYTLDWAMDK	FHNYTLDWAMDK[512]	2	y	1	2	12	CRH1-N177YT	0	FALSE	0	0.99	FALSE	1
537	262.14	12	CRH1-N177YT		1	FHNYTLDWAMDK	FHNYTLDWAMDK[537]	2	y	1	2	12	CRH1-N177YT	0	FALSE	0	0.99	FALSE	1
562	262.14	12	CRH1-N177YT		1	FHNYTLDWAMDK	FHNYTLDWAMDK[562]	2	y	1	2	12	CRH1-N177YT	0	FALSE	0	0.99	FALSE	1
587	262.14	12	CRH1-N177YT		1	FHNYTLDWAMDK	FHNYTLDWAMDK[587]	2	y	1	2	12	CRH1-N177YT	0	FALSE	0	0.99	FALSE	1
612	262.14	12	CRH1-N177YT		1	FHNYTLDWAMDK	FHNYTLDWAMDK[612]	2	y	1	2	12	CRH1-N177YT	0	FALSE	0	0.99	FALSE	1
637	262.14	12	CRH1-N177YT		1	FHNYTLDWAMDK	FHNYTLDWAMDK[637]	2	y	1	2	12	CRH1-N177YT	0	FALSE	0	0.99	FALSE	1
662	262.14	12	CRH1-N177YT		1	FHNYTLDWAMDK	FHNYTLDWAMDK[662]	2	y	1	2	12	CRH1-N177YT	0	FALSE	0	0.99	FALSE	1
687	262.14	12	CRH1-N177YT		1	FHNYTLDWAMDK	FHNYTLDWAMDK[687]	2	y	1	2	12	CRH1-N177YT	0	FALSE	0	0.99	FALSE	1
712	262.14	12	CRH1-N177YT		1	FHNYTLDWAMDK	FHNYTLDWAMDK[712]	2	y	1	2	12	CRH1-N177YT	0	FALSE	0	0.99	FALSE	1
737	262.14	12	CRH1-N177YT		1	FHNYTLDWAMDK	FHNYTLDWAMDK[737]	2	y	1	2	12	CRH1-N177YT	0	FALSE	0	0.99	FALSE	1
762	262.14	12	CRH1-N177YT		1	FHNYTLDWAMDK	FHNYTLDWAMDK[762]	2	y	1	2	12	CRH1-N177YT	0	FALSE	0	0.99	FALSE	1
787	262.14	12	CRH1-N177YT		1	FHNYTLDWAMDK	FHNYTLDWAMDK[787]	2	y	1	2	12	CRH1-N177YT	0	FALSE	0	0.99	FALSE	1
812	262.14	12	CRH1-N177YT		1	FHNYTLDWAMDK	FHNYTLDWAMDK[812]	2	y	1	2	12	CRH1-N177YT	0	FALSE	0	0.99	FALSE	1
837	262.14	12	CRH1-N177YT		1	FHNYTLDWAMDK	FHNYTLDWAMDK[837]	2	y	1	2	12	CRH1-N177YT	0	FALSE	0	0.99	FALSE	1
862	262.14	12	CRH1-N177YT		1	FHNYTLDWAMDK	FHNYTLDWAMDK[862]	2	y	1	2	12	CRH1-N177YT	0	FALSE	0	0.99	FALSE	1
887	262.14	12	CRH1-N177YT		1	FHNYTLDWAMDK	FHNYTLDWAMDK[887]	2	y	1	2	12	CRH1-N177YT	0	FALSE	0	0.99	FALSE	1
912	262.14	12	CRH1-N177YT		1	FHNYTLDWAMDK	FHNYTLDWAMDK[912]	2	y	1	2	12	CRH1-N177YT	0	FALSE	0	0.99	FALSE	1
937	262.14	12	CRH1-N177YT		1	FHNYTLDWAMDK	FHNYTLDWAMDK[937]	2	y	1	2	12	CRH1-N177YT	0	FALSE	0	0.99	FALSE	1
962	262.14	12	CRH1-N177YT		1	FHNYTLDWAMDK	FHNYTLDWAMDK[962]	2	y	1	2	12	CRH1-N177YT	0	FALSE	0	0.99	FALSE	1
987	262.14	12	CRH1-N177YT		1	FHNYTLDWAMDK	FHNYTLDWAMDK[987]	2	y	1	2	12	CRH1-N177YT	0	FALSE	0	0.99	FALSE	1
1012	262.14	12	CRH1-N177YT		1	FHNYTLDWAMDK	FHNYTLDWAMDK[1012]	2	y	1	2	12	CRH1-N177YT	0	FALSE	0	0.99	FALSE	1
1037	262.14	12	CRH1-N177YT		1	FHNYTLDWAMDK	FHNYTLDWAMDK[1037]	2	y	1	2	12	CRH1-N177YT	0	FALSE	0	0.99	FALSE	1
1062	262.14	12	CRH1-N177YT		1	FHNYTLDWAMDK	FHNYTLDWAMDK[1062]	2	y	1	2	12	CRH1-N177YT	0	FALSE	0	0.99	FALSE	1
1087	262.14	12	CRH1-N177YT		1	FHNYTLDWAMDK	FHNYTLDWAMDK[1087]	2	y	1	2	12	CRH1-N177YT	0	FALSE	0	0.99	FALSE	1
1112	262.14	12	CRH1-N177YT		1	FHNYTLDWAMDK	FHNYTLDWAMDK[1112]	2	y	1	2	12	CRH1-N177YT	0	FALSE	0	0.99	FALSE	1
1137	262.14	12	CRH1-N177YT		1	FHNYTLDWAMDK	FHNYTLDWAMDK[1137]	2	y	1	2	12	CRH1-N177YT	0	FALSE	0	0.99	FALSE	1
1162	262.14	12	CRH1-N177YT		1	FHNYTLDWAMDK	FHNYTLDWAMDK[1162]	2	y	1	2	12	CRH1-N177YT	0	FALSE	0	0.99	FALSE	1
1187	262.14	12	CRH1-N177YT		1	FHNYTLDWAMDK	FHNYTLDWAMDK[1187]	2	y	1	2	12	CRH1-N177YT	0	FALSE	0	0.99	FALSE	1
1212	262.14	12	CRH1-N177YT		1	FHNYTLDWAMDK	FHNYTLDWAMDK[1212]	2	y	1	2	12	CRH1-N177YT	0	FALSE	0	0.99	FALSE	1
1237	262.14	12	CRH1-N177YT		1	FHNYTLDWAMDK	FHNYTLDWAMDK[1237]	2	y	1	2	12	CRH1-N177YT	0	FALSE	0	0.99	FALSE	1
412.5	143.071	12	CRH1-N177YT		1	FHNYTLDWAMDK	FHNYTLDWAMDK[412]	2	b	2	2	12	CRH1-N177YT	0	FALSE	0	0.99	FALSE	1
437	143.071	12	CRH1-N177YT		1	FHNYTLDWAMDK	FHNYTLDWAMDK[437]	2	b	2	2	12	CRH1-N177YT	0	FALSE	0	0.99	FALSE	1
462	143.071	12	CRH1-N177YT		1	FHNYTLDWAMDK	FHNYTLDWAMDK[462]	2	b	2	2	12	CRH1-N177YT	0	FALSE	0	0.99	FALSE	1
487	143.071	12	CRH1-N177YT		1	FHNYTLDWAMDK	FHNYTLDWAMDK[487]	2	b	2	2	12	CRH1-N177YT	0	FALSE	0	0.99	FALSE	1
512	143.071	12	CRH1-N177YT		1	FHNYTLDWAMDK	FHNYTLDWAMDK[512]	2	b	2	2	12	CRH1-N177YT	0	FALSE	0	0.99	FALSE	1
537	143.071	12	CRH1-N177YT		1	FHNYTLDWAMDK	FHNYTLDWAMDK[537]	2	b	2	2	12	CRH1-N177YT	0	FALSE	0	0.99	FALSE	1
562	143.071	12	CRH1-N177YT		1	FHNYTLDWAMDK	FHNYTLDWAMDK[562]	2	b	2	2	12	CRH1-N177YT	0	FALSE	0	0.99	FALSE	1
587	143.071	12	CRH1-N177YT		1	FHNYTLDWAMDK	FHNYTLDWAMDK[587]	2	b	2	2	12	CRH1-N177YT	0	FALSE	0	0.99	FALSE	1
612	143.071	12	CRH1-N177YT		1	FHNYTLDWAMDK	FHNYTLDWAMDK[612]	2	b	2	2	12	CRH1-N177YT	0	FALSE	0	0.99	FALSE	1
637	143.071	12	CRH1-N177YT		1	FHNYTLDWAMDK	FHNYTLDWAMDK[637]	2	b	2	2	12	CRH1-N177YT	0	FALSE	0	0.99	FALSE	1
662	143.071	12	CRH1-N177YT		1	FHNYTLDWAMDK	FHNYTLDWAMDK[662]	2	b	2	2	12	CRH1-N177YT	0	FALSE	0	0.99	FALSE	1
687	143.071	12	CRH1-N177YT		1	FHNYTLDWAMDK	FHNYTLDWAMDK[687]	2	b	2	2	12	CRH1-N177YT	0	FALSE	0	0.99	FALSE	1
712	143.071	12	CRH1-N177YT		1	FHNYTLDWAMDK	FHNYTLDWAMDK[712]	2	b	2	2	12	CRH1-N177YT	0	FALSE	0	0.99	FALSE	1
737	143.071	12	CRH1-N177YT		1	FHNYTLDWAMDK	FHNYTLDWAMDK[737]	2	b	2	2	12	CRH1-N177YT	0	FALSE	0	0.99	FALSE	1
762	143.071	12	CRH1-N177YT		1	FHNYTLDWAMDK	FHNYTLDWAMDK[762]	2	b	2	2	12	CRH1-N177YT	0	FALSE	0	0.99	FALSE	1
787	143.071	12	CRH1-N177YT		1	FHNYTLDWAMDK	FHNYTLDWAMDK[787]	2	b	2	2	12	CRH1-N177YT	0	FALSE	0	0.99	FALSE	1
812	143.071	12	CRH1-N177YT		1	FHNYTLDWAMDK	FHNYTLDWAMDK[812]	2	b	2	2	12	CRH1-N177YT	0	FALSE	0	0.99	FALSE	1
837	143.071	12	CRH1-N177YT		1	FHNYTLDWAMDK	FHNYTLDWAMDK[837]	2	b	2	2	12	CRH1-N177YT	0	FALSE	0	0.99	FALSE	1
862	143.071	12	CRH1-N177YT		1	FHNYTLDWAMDK	FHNYTLDWAMDK[862]	2	b	2	2	12	CRH1-N177YT	0	FALSE	0	0.99	FALSE	1
887	143.071	12	CRH1-N177YT		1	FHNYTLDWAMDK	FHNYTLDWAMDK[887]	2	b	2	2	12	CRH1-N177YT	0	FALSE	0	0.99	FALSE	1
912	143.071	12	CRH1-N177YT		1	FHNYTLDWAMDK	FHNYTLDWAMDK[912]	2	b	2	2	12	CRH1-N177YT	0	FALSE	0	0.99	FALSE	1
937	143.071	12	CRH1-N177YT		1	FHNYTLDWAMDK	FHNYTLDWAMDK[937]	2	b	2	2	12	CRH1-N177YT	0	FALSE	0	0.99	FALSE	1
962	143.071	12	CRH1-N177YT		1	FHNYTLDWAMDK	FHNYTLDWAMDK[962]	2	b	2	2	12	CRH1-N177YT	0	FALSE	0	0.99	FALSE	1
987	143.071	12	CRH1-N177YT		1	FHNYTLDWAMDK	FHNYTLDWAMDK[987]	2	b	2	2	12	CRH1-N177YT	0	FALSE	0	0.99	FALSE	1
1012	143.071	12	CRH1-N177YT		1	FHNYTLDWAMDK	FHNYTLDWAMDK[1012]	2	b	2	2	12	CRH1-N177YT	0	FALSE	0	0.99	FALSE	1
1037	143.071	12	CRH1-N177YT		1	FHNYTLDWAMDK	FHNYTLDWAMDK[1037]	2	b	2	2	12	CRH1-N177YT	0	FALSE	0	0.99	FALSE	1
1062	143.071	12	CRH1-N177YT		1	FHNYTLDWAMDK	FHNYTLDWAMDK[1062]	2	b	2	2	12	CRH1-N177YT	0	FALSE	0	0.99	FALSE	1
1087	143.071	12	CRH1-N177YT		1	FHNYTLDWAMDK	FHNYTLDWAMDK[1087]	2	b	2	2	12	CRH1-N177YT	0	FALSE	0	0.99	FALSE	1
1112	143.071	12	CRH1-N177YT		1	FHNYTLDWAMDK	FHNYTLDWAMDK[1112]	2	b	2	2	12	CRH1-N177YT	0	FALSE	0	0.99	FALSE	1
1137	143.071	12	CRH1-N177YT		1	FHNYTLDWAMDK	FHNYTLDWAMDK[1137]	2	b	2	2	12	CRH1-N177YT	0	FALSE	0	0.99	FALSE	1
1162	143.071	12	CRH1-N177YT		1	FHNYTLDWAMDK	FHNYTLDWAMDK[1162]	2	b	2	2	12	CRH1-N177YT	0	FALSE	0	0.99	FALSE	1
1187	143.071	12	CRH1-N177YT		1	FHNYTLDWAMDK	FHNYTLDWAMDK[1187]	2	b	2	2	12	CRH1-N177YT	0	FALSE	0	0.99	FALSE	1
1212	143.071	12	CRH1-N177YT		1	FHNYTLDWAMDK	FHNYTLDWAMDK[1212]	2	b	2	2	12	CRH1-N177YT	0	FALSE	0	0.99	FALSE	1
1237	143.071	12	CRH1-N177YT		1	FHNYTLDWAMDK	FHNYTLDWAMDK[1237]	2	b	2	2	12	CRH1-N177YT	0	FALSE	0	0.99	FALSE	1
412.5	131.573	12	CRH1-N177YT		1	FHNYTLDWAMDK	FHNYTLDWAMDK[412]	2	y	2	2	12	CRH1-N177YT	0	FALSE	0	0.99	FALSE	1
437	131.573	12	CRH1-N177YT		1	FHNYTLDWAMDK	FHNYTLDWAMDK[437]	2	y	2	2	12	CRH1-N177YT	0	FALSE	0	0.99	FALSE	1
462	131.573	12	CRH1-N177YT		1	FHNYTLDWAMDK	FHNYTLDWAMDK[462]	2	y	2	2	12	CRH1-N177YT	0	FALSE	0	0.99	FALSE	1
487	131.573	12	CRH1-N177YT		1	FHNYTLDWAMDK	FHNYTLDWAMDK[487]	2	y	2	2	12	CRH1-N177YT	0	FALSE	0	0.99	FALSE	1
512	131.573	12	CRH1-N177YT		1	FHNYTLDWAMDK	FHNYTLDWAMDK[512]	2	y	2	2	12	CRH1-N177YT	0	FALSE	0	0.99	FALSE	1
537	131.573	12	CRH1-N177YT		1	FHNYTLDWAMDK	FHNYTLDWAMDK[537]	2	y	2	2	12	CRH1-N177YT	0	FALSE	0	0.99	FALSE	1
562	131.573	12	CRH1-N177YT		1	FHNYTLDWAMDK	FHNYTLDWAMDK[562]	2	y	2	2	12	CRH1-N177YT	0	FALSE	0	0.99	FALSE	1
587	131.573	12	CRH1-N177YT		1	FHNYTLDWAMDK	FHNYTLDWAMDK[587]	2	y	2	2	12	CRH1-N177YT	0	FALSE	0	0.99	FALSE	1
612	131.573	12	CRH1-N177YT		1	FHNYTLDWAMDK	FHNYTLDWAMDK[612]	2	y	2	2	12	CRH1-N177YT	0	FALSE	0	0.99	FALSE	1
637	131.573	12	CRH1-N177YT		1	FHNYTLDWAMDK	FHNYTLDWAMDK[637]	2	y	2	2	12	CRH1-N177YT	0	FALSE	0	0.99	FALSE	1
662	131.573	12	CRH1-N177YT		1	FHNYTLDWAMDK	FHNYTLDWAMDK[662]	2	y	2	2	12	CRH1-N177YT	0	FALSE	0	0.99	FALSE	1
687	131.573	12	CRH1-N177YT		1	FHNYTLDWAMDK	FHNYTLDWAMDK[687]	2	y	2	2	12	CRH1-N177YT	0	FALSE	0	0.99	FALSE	1
712	131.573	12	CRH1-N177YT		1	FHNYTLDWAMDK	FHNYTLDWAMDK[712]	2	y	2	2	12	CRH1-N177YT	0	FALSE	0	0.99	FALSE	1
737	131.573	12	CRH1-N177YT		1	FHNYTLDWAMDK	FHNYTLDWAMDK[737]	2	y	2	2	12	CRH1-N177YT	0	FALSE	0	0.99	FALSE	1
762	131.573	12	CRH1-N177YT		1	FHNYTLDWAMDK	FHNYTLDWAMDK[762]	2	y	2	2	12	CRH1-N177YT	0	FALSE	0	0.99	FALSE	1
787	131.573	12	CRH1-N177YT		1	FHNYTLDWAMDK	FHNYTLDWAMDK[787]	2	y	2	2	12	CRH1-N177YT	0	FALSE	0	0.99	FALSE	1
812	131.573	12	CRH1-N177YT		1	FHNYTLDWAMDK	FHNYTLDWAMDK[812]	2	y	2	2	12	CRH1-N177YT	0	FALSE	0	0.99	FALSE	1
837	131.573	12	CRH1-N177YT		1	FHNYTLDWAMDK	FHNYTLDWAMDK[837]	2	y	2	2	12	CRH1-N177YT	0	FALSE	0	0.99	FALSE	1
862	131.573	12	CRH1-N177YT		1	FHNYTLDWAMDK	FHNYTLDWAMDK[862]	2	y	2	2	12	CRH1-N177YT	0	FALSE	0	0.99	FALSE	1
887	131.573	12	CRH1-N177YT		1	FHNYTLDWAMDK	FHNYTLDWAMDK[887]	2	y	2	2	12	CRH1-N177YT	0	FALSE	0	0.99	FALSE	1
912	131.573	12	CRH1-N177YT		1	FHNYTLDWAMDK	FHNYTLDWAMDK[912]	2	y	2	2	12	CRH1-N177YT	0	FALSE	0	0.99	FALSE	1
937	131.573	12	CRH1-N177YT		1	FHNYTLDWAMDK	FHNYTLDWAMDK[937]	2	y	2	2	12	CRH1-N177YT	0	FALSE	0	0.99	FALSE	1
962	131.573	12	CRH1-N177YT		1	FHNYTLDWAMDK	FHNYTLDWAMDK[962]	2	y	2	2	12	CRH1-N177YT	0	FALSE	0	0.99	FALSE	1
987	131.573	12	CRH1-N177YT		1	FHNYTLDWAMDK	FHNYTLDWAMDK[987]	2	y	2	2	12	CRH1-N177YT	0	FALSE	0	0.99	FALSE	1
1012	131.573	12	CRH1-N177YT		1	FHNYTLDWAMDK	FHNYTLDWAMDK[1012]	2	y	2	2	12	CRH1-N177YT	0	FALSE	0	0.99	FALSE	1
1037	131.573	12	CRH1-N177YT		1	FHNYTLDWAMDK	FHNYTLDWAMDK[1037]	2	y	2	2	12	CRH1-N177YT	0	FALSE	0	0.99	FALSE	1
1062	131.573	12	CRH1-N177YT		1	FHNYTLDWAMDK	FHNYTLDWAMDK[1062]	2	y	2	2	12	CRH1-N177YT	0	FALSE	0	0.99	FALSE	1
1087	131.573	12	CRH1-N177YT		1	FHNYTLDWAMDK	FHNYTLDWAMDK[1087]	2	y	2	2	12	CRH1-N177YT	0	FALSE	0	0.99	FALSE	1
1112	131.573	12	CRH1-N177YT		1	FHNYTLDWAMDK	FHNYTLDWAMDK[1112]	2	y	2	2	12	CRH1-N177YT	0	FALSE	0	0.99	FALSE	1
1137	131.573	12	CRH1-N177YT		1	FHNYTLDWAMDK	FHNYTLDWAMDK[1137]	2	y	2	2	12	CRH1-N177YT	0	FALSE	0	0.99	FALSE	1
1162	131.573	12	CRH1-N177YT		1	FHNYTLDWAMDK	FHNYTLDWAMDK[1162]	2	y	2	2	12	CRH1-N177YT	0	FALSE	0	0.99	FALSE	1
1187	131.573	12	CRH1-N177YT		1	FHNYTLDWAMDK	FHNYTLDWAMDK[1187]	2	y	2	2	12	CRH1-N177YT	0	FALSE	0	0.99	FALSE	1
1212	131.573	12	CRH1-N177YT		1	FHNYTLDWAMDK	FHNYTLDWAMDK[1212]	2	y	2	2	12	CRH1-N177YT	0	FALSE	0	0.99	FALSE	1
1237	131.573	12	CRH1-N177YT		1	FHNYTLDWAMDK	FHNYTLDWAMDK[1237]	2	y	2	2	12	CRH1-N177YT	0	FALSE	0	0.99	FALSE	1
412.5	399.178	12	CRH1-N177YT		1	FHNYTLDWAMDK	FHNYTLDWAMDK[412]	2	b	1	3	12	CRH1-N177YT	0	FALSE	0	0.99	FALSE	1
437	399.178	12	CRH1-N177YT		1	FHNYTLDWAMDK	FHNYTLDWAMDK[437]	2	b	1	3	12	CRH1-N177YT	0	FALSE	0	0.99	FALSE	1
462	399.178	12	CRH1-N177YT		1	FHNYTLDWAMDK	FHNYTLDWAMDK[462]	2	b	1	3	12	CRH1-N177YT	0	FALSE	0	0.99	FALSE	1
487	399.178	12	CRH1-N177YT		1	FHNYTLDWAMDK	FHNYTLDWAMDK[487]	2	b	1	3	12	CRH1-N177YT	0	FALSE	0	0.99	FALSE	1
512	399.178	12	CRH1-N177YT		1	FHNYTLDWAMDK	FHNYTLDWAMDK[512]	2	b	1	3	12	CRH1-N177YT	0	FALSE	0	0.99	FALSE	1
537	399.178	12	CRH1-N177YT		1	FHNYTLDWAMDK	FHNYTLDWAMDK[537]	2	b	1	3	12	CRH1-N177YT	0	FALSE	0	0.99	FALSE	1
562	399.178	12	CRH1-N177YT		1	FHNYTLDWAMDK	FHNYTLDWAMDK[562]	2	b	1	3	12	CRH1-N177YT	0	FALSE	0	0.99	FALSE	1
587	399.178	12	CRH1-N177YT		1	FHNYTLDWAMDK	FHNYTLDWAMDK[587]	2	b	1	3	12	CRH1-N177YT	0	FALSE	0	0.99	FALSE	1
612	399.178	12	CRH1-N177YT		1	FHNYTLDWAMDK	FHNYTLDWAMDK[612]	2	b	1	3	12	CRH1-N177YT	0	FALSE	0	0.99	FALSE	1
637	399.178	12	CRH1-N177YT		1	FHNYTLDWAMDK	FHNYTLDWAMDK[637]	2	b	1	3	12	CRH1-N177YT	0	FALSE	0	0.99	FALSE	1
662	399.178	12	CRH1-N177YT		1	FHNYTLDWAMDK	FHNYTLDWAMDK[662]	2	b	1	3	12	CRH1-N177YT	0	FALSE	0	0.99	FALSE	1
687	399.178	12	CRH1-N177YT		1	FHNYTLDWAMDK	FHNYTLDWAMDK[687]	2	b	1	3	12	CRH1-N177YT	0	FALSE	0	0.99	FALSE	1
712	399.178	12	CRH1-N177YT		1	FHNYTLDWAMDK	FHNYTLDWAMDK[712]	2	b	1	3	12	CRH1-N177YT	0	FALSE	0	0.99	FALSE	1
737	399.178	12	CRH1-N177YT		1	FHNYTLDWAMDK	FHNYTLDWAMDK[737]	2	b	1	3	12	CRH1-N177YT	0	FALSE	0	0.99	FALSE	1
762	399.178	12	CRH1-N177YT		1	FHNYTLDWAMDK	FHNYTLDWAMDK[762]	2	b	1	3	12	CRH1-N177YT	0	FALSE	0	0.99	FALSE	1
787	399.178	12	CRH1-N177YT		1	FHNYTLDWAMDK	FHNYTLDWAMDK[787]	2	b	1	3	12	CRH1-N177YT	0	FALSE	0	0.99	FALSE	1
812	399.178	12	CRH1-N177YT		1	FHNYTLDWAMDK	FHNYTLDWAMDK[812]	2	b	1	3	12	CRH1-N177YT	0	FALSE	0	0.99	FALSE	1
837	399.178	12	CRH1-N177YT		1	FHNYTLDWAMDK	FHNYTLDWAMDK[837]	2	b	1	3	12	CRH1-N177YT	0	FALSE	0	0.99	FALSE	1
862	399.178	12	CRH1-N177YT		1	FHNYTLDWAMDK	FHNYTLDWAMDK[862]	2	b	1	3	12	CRH1-N177YT	0	FALSE	0	0.99	FALSE	1
887	399.178	12	CRH1-N177YT		1	FHNYTLDWAMDK	FHNYTLDWAMDK[887]	2	b	1	3	12	CRH1-N177YT	0	FALSE	0	0.99	FALSE	1
912	399.178	12	CRH1-N177YT		1	FHNYTLDWAMDK	FHNYTLDWAMDK[912]	2	b	1	3	12	CRH1-N177YT	0	FALSE	0	0.99	FALSE	1
937	399.178	12	CRH1-N177YT		1	FHNYTLDWAMDK	FHNYTLDWAMDK[937]	2	b	1	3	12	CRH1-N177YT	0	FALSE	0	0.99	FALSE	1
962	399.178	12	CRH1-N177YT		1	FHNYTLDWAMDK	FHNYTLDWAMDK[962]	2	b	1	3	12	CRH1-N177YT	0	FALSE	0	0.99	FALSE	1
987	399.178	12	CRH1-N177YT		1	FHNYTLDWAMDK	FHNYTLDWAMDK[987]	2	b	1	3	12	CRH1-N177YT	0	FALSE	0	0.99	FALSE	1
1012	399.178	12	CRH1-N177YT		1	FHNYTLDWAMDK	FHNYTLDWAMDK[1012]	2	b	1	3	12	CRH1-N177YT	0	FALSE	0	0.99	FALSE	1
1037	399.178	12	CRH1-N177YT		1	FHNYTLDWAMDK	FHNYTLDWAMDK[1037]	2	b	1	3	12	CRH1-N177YT	0	FALSE	0	0.99	FALSE	1
1062	399.178	12	CRH1-N177YT		1	FHNYTLDWAMDK	FHNYTLDWAMDK[1062]	2	b	1	3	12	CRH1-N177YT	0	FALSE	0	0.99	FALSE	1
1087	399.178	12	CRH1-N177YT		1	FHNYTLDWAMDK	FHNYTLDWAMDK[1087]	2	b	1	3	12	CRH1-N177YT	0	FALSE	0	0.99	FALSE	1
1112	399.178	12	CRH1-N177YT		1	FHNYTLDWAMDK	FHNYTLDWAMDK[1112]	2	b	1	3	12	CRH1-N177YT	0	FALSE	0	0.99	FALSE	1
1137	399.178	12	CRH1-N177YT		1	FHNYTLDWAMDK	FHNYTLDWAMDK[1137]	2	b	1	3	12	CRH1-N177YT	0	FALSE	0	0.99	FALSE	1
1162	399.178	12	CRH1-N177YT		1	FHNYTLDWAMDK	FHNYTLDWAMDK[1162]	2	b	1	3	12	CRH1-N177YT	0	FALSE	0	0.99	FALSE	1
1187	399.178	12	CRH1-N177YT		1	FHNYTLDWAMDK	FHNYTLDWAMDK[1187]	2	b	1	3	12	CRH1-N177YT	0	FALSE	0	0.99	FALSE	1
1212	399.178	12	CRH1-N177YT		1	FHNYTLDWAMDK	FHNYTLDWAMDK[1212]	2	b	1	3	12	CRH1-N177YT	0	FALSE	0	0.99	FALSE	1
1237	399.178	12	CRH1-N177YT		1	FHNYTLDWAMDK	FHNYTLDWAMDK[1237]	2	b	1	3	12	CRH1-N177YT	0	FALSE	0	0.99	FALSE	1
412.5	393.18	12	CRH1-N177YT		1	FHNYTLDWAMDK	FHNYTLDWAMDK[412]	2	y	1	3	12	CRH1-N177YT	0	FALSE	0	0.99	FALSE	1
437	393.18	12	CRH1-N177YT		1	FHNYTLDWAMDK	FHNYTLDWAMDK[437]	2	y	1	3	12	CRH1-N177YT	0	FALSE	0	0.99	FALSE	1
462	393.18	12	CRH1-N177YT		1	FHNYTLDWAMDK	FHNYTLDWAMDK[462]	2	y	1	3	12	CRH1-N177YT	0	FALSE	0	0.99	FALSE	1
487	393.18	12	CRH1-N177YT		1	FHNYTLDWAMDK	FHNYTLDWAMDK[487]	2	y	1	3	12	CRH1-N177YT	0	FALSE	0	0.99	FALSE	1
512	393.18	12	CRH1-N177YT		1	FHNYTLDWAMDK	FHNYTLDWAMDK[512]	2	y	1	3	12	CRH1-N177YT	0	FALSE	0	0.99	FALSE	1
537	393.18	12	CRH1-N177YT		1	FHNYTLDWAMDK	FHNYTLDWAMDK[537]	2	y	1	3	12	CRH1-N177YT	0	FALSE	0	0.99	FALSE	1
562	393.18	12	CRH1-N177YT		1	FHNYTLDWAMDK	FHNYTLDWAMDK[562]	2	y	1	3	12	CRH1-N177YT	0	FALSE	0	0.99	FALSE	1
587	393.18	12	CRH1-N177YT		1	FHNYTLDWAMDK	FHNYTLDWAMDK[587]	2	y	1	3	12	CRH1-N177YT	0	FALSE	0	0.99	FALSE	1
612	393.18	12	CRH1-N177YT		1	FHNYTLDWAMDK	FHNYTLDWAMDK[612]	2	y	1	3	12	CRH1-N177YT	0	FALSE	0	0.99	FALSE	1
637	393.18	12	CRH1-N177YT		1	FHNYTLDWAMDK	FHNYTLDWAMDK[637]	2	y	1	3	12	CRH1-N177YT	0	FALSE	0	0.99	FALSE	1
662	393.18	12	CRH1-N177YT		1	FHNYTLDWAMDK	FHNYTLDWAMDK[662]	2	y	1	3	12	CRH1-N177YT	0	FALSE	0	0.99	FALSE	1
687	393.18	12	CRH1-N177YT		1	FHNYTLDWAMDK	FHNYTLDWAMDK[687]	2	y	1	3	12	CRH1-N177YT	0	FALSE	0	0.99	FALSE	1
712	393.18	12	CRH1-N177YT		1	FHNYTLDWAMDK	FHNYTLDWAMDK[712]	2	y	1	3	12	CRH1-N177YT	0	FALSE	0	0.99	FALSE	1
737	393.18	12	CRH1-N177YT		1	FHNYTLDWAMDK	FHNYTLDWAMDK[737]	2	y	1	3	12	CRH1-N177YT	0	FALSE	0	0.99	FALSE	1
762	393.18	12	CRH1-N177YT		1	FHNYTLDWAMDK	FHNYTLDWAMDK[762]	2	y	1	3	12	CRH1-N177YT	0	FALSE	0	0.99	FALSE	1
787	393.18	12	CRH1-N177YT		1	FHNYTLDWAMDK	FHNYTLDWAMDK[787]	2	y	1	3	12	CRH1-N177YT	0	FALSE	0	0.99	FALSE	1
812	393.18	12	CRH1-N177YT		1	FHNYTLDWAMDK	FHNYTLDWAMDK[812]	2	y	1	3	12	CRH1-N177YT	0	FALSE	0	0.99	FALSE	1
837	393.18	12	CRH1-N177YT		1	FHNYTLDWAMDK	FHNYTLDWAMDK[837]	2	y	1	3	12	CRH1-N177YT	0	FALSE	0	0.99	FALSE	1
862	393.18	12	CRH1-N177YT		1	FHNYTLDWAMDK	FHNYTLDWAMDK[862]	2	y	1	3	12	CRH1-N177YT	0	FALSE	0	0.99	FALSE	1
887	393.18	12	CRH1-N177YT		1	FHNYTLDWAMDK	FHNYTLDWAMDK[887]	2	y	1	3	12	CRH1-N177YT	0	FALSE	0	0.99	FALSE	1
912	393.18	12	CRH1-N177YT		1	FHNYTLDWAMDK	FHNYTLDWAMDK[912]	2	y	1	3	12	CRH1-N177YT	0	FALSE	0	0.99	FALSE	1
937	393.18	12	CRH1-N177YT		1	FHNYTLDWAMDK	FHNYTLDWAMDK[937]	2	y	1	3	12	CRH1-N177YT	0	FALSE	0	0.99	FALSE	1
962	393.18	12	CRH1-N177YT		1	FHNYTLDWAMDK	FHNYTLDWAMDK[962]	2	y	1	3	12	CRH1-N177YT	0	FALSE	0	0.99	FALSE	1
987	393.18	12	CRH1-N177YT		1	FHNYTLDWAMDK	FHNYTLDWAMDK[987]	2	y	1	3	12	CRH1-N177YT	0	FALSE	0	0.99	FALSE	1
1012	393.18	12	CRH1-N177YT		1	FHNYTLDWAMDK	FHNYTLDWAMDK[1012]	2	y	1	3	12	CRH1-N177YT	0	FALSE	0	0.99	FALSE	1
1037	393.18	12	CRH1-N177YT		1	FHNYTLDWAMDK	FHNYTLDWAMDK[1037]	2	y	1	3	12	CRH1-N177YT	0	FALSE	0	0.99	FALSE	1
1062	393.18	12	CRH1-N177YT		1	FHNYTLDWAMDK	FHNYTLDWAMDK[1062]	2	y	1	3	12	CRH1-N177YT	0	FALSE	0	0.99	FALSE	1
1087	393.18	12	CRH1-N177YT		1	FHNYTLDWAMDK	FHNYTLDWAMDK[1087]	2	y	1	3	12	CRH1-N177YT	0	FALSE	0	0.99	FALSE	1
1112	393.18	12	CRH1-N177YT		1	FHNYTLDWAMDK	FHNYTLDWAMDK[1112]	2	y	1	3	12	CRH1-N177YT	0	FALSE	0	0.99	FALSE	1
1137	393.18	12	CRH1-N177YT		1	FHNYTLDWAMDK	FHNYTLDWAMDK[1137]	2	y	1	3	12	CRH1-N177YT	0	FALSE	0	0.99	FALSE	1
1162	393.18	12	CRH1-N177YT		1	FHNYTLDWAMDK	FHNYTLDWAMDK[1162]	2	y	1	3	12	CRH1-N177YT	0	FALSE	0	0.99	FALSE	1
1187	393.18	12	CRH1-N177YT		1	FHNYTLDWAMDK	FHNYTLDWAMDK[1187]	2	y	1	3	12	CRH1-N177YT	0	FALSE	0	0.99	FALSE	1
1212	393.18	12	CRH1-N177YT		1	FHNYTLDWAMDK	FHNYTLDWAMDK[1212]	2	y	1	3	12	CRH1-N177YT	0	FALSE	0	0.99	FALSE	1
1237	393.18	12	CRH1-N177YT		1	FHNYTLDWAMDK	FHNYTLDWAMDK[1237]	2	y	1	3	12	CRH1-N177YT	0	FALSE	0	0.99	FALSE	1
412.5	200.092	12	CRH1-N177YT		1	FHNYTLDWAMDK	FHNYTLDWAMDK[412]	2	b	2	3	12	CRH1-N177YT	0	FALSE	0	0.99	FALSE	1
437	200.092	12	CRH1-N177YT		1	FHNYTLDWAMDK	FHNYTLDWAMDK[437]	2	b	2	3	12	CRH1-N177YT	0	FALSE	0	0.99	FALSE	1
462	200.092	12	CRH1-N177YT		1	FHNYTLDWAMDK	FHNYTLDWAMDK[462]	2	b	2	3	12	CRH1-N177YT	0	FALSE	0	0.99	FALSE	1
487	200.092	12	CRH1-N177YT		1	FHNYTLDWAMDK	FHNYTLDWAMDK[487]	2	b	2	3	12	CRH1-N177YT	0	FALSE	0	0.99	FALSE	1
512	200.092	12	CRH1-N177YT		1	FHNYTLDWAMDK	FHNYTLDWAMDK[512]	2	b	2	3	12	CRH1-N177YT	0	FALSE	0	0.99	FALSE	1
537	200.092	12	CRH1-N177YT		1	FHNYTLDWAMDK	FHNYTLDWAMDK[537]	2	b	2	3	12	CRH1-N177YT	0	FALSE	0	0.99	FALSE	1
562	200.092	12	CRH1-N177YT		1	FHNYTLDWAMDK	FHNYTLDWAMDK[562]	2	b	2	3	12	CRH1-N177YT	0	FALSE	0	0.99	FALSE	1
587	200.092	12	CRH1-N177YT		1	FHNYTLDWAMDK	FHNYTLDWAMDK[587]	2	b	2	3	12	CRH1-N177YT	0	FALSE	0	0.99	FALSE	1
612	200.092	12	CRH1-N177YT		1	FHNYTLDWAMDK	FHNYTLDWAMDK[612]	2	b	2	3	12	CRH1-N177YT	0	FALSE	0	0.99	FALSE	1
637	200.092	12	CRH1-N177YT		1	FHNYTLDWAMDK	FHNYTLDWAMDK[637]	2	b	2	3	12	CRH1-N177YT	0	FALSE	0	0.99	FALSE	1
662	200.092	12	CRH1-N177YT		1	FHNYTLDWAMDK	FHNYTLDWAMDK[662]	2	b	2	3	12	CRH1-N177YT	0	FALSE	0	0.99	FALSE	1
687	200.092	12	CRH1-N177YT		1	FHNYTLDWAMDK	FHNYTLDWAMDK[687]	2	b	2	3	12	CRH1-N177YT	0	FALSE	0	0.99	FALSE	1
712	200.092	12	CRH1-N177YT		1	FHNYTLDWAMDK	FHNYTLDWAMDK[712]	2	b	2	3	12	CRH1-N177YT	0	FALSE	0	0.99	FALSE	1
737	200.092	12	CRH1-N177YT		1	FHNYTLDWAMDK	FHNYTLDWAMDK[737]	2	b	2	3	12	CRH1-N177YT	0	FALSE	0	0.99	FALSE	1
762	200.092	12	CRH1-N177YT		1	FHNYTLDWAMDK	FHNYTLDWAMDK[762]	2	b	2	3	12	CRH1-N177YT	0	FALSE	0	0.99	FALSE	1
787	200.092	12	CRH1-N177YT		1	FHNYTLDWAMDK	FHNYTLDWAMDK[787]	2	b	2	3	12	CRH1-N177YT	0	FALSE	0	0.99	FALSE	1
812	200.092	12	CRH1-N177YT		1	FHNYTLDWAMDK	FHNYTLDWAMDK[812]	2	b	2	3	12	CRH1-N177YT	0	FALSE	0	0.99	FALSE	1
837	200.092	12	CRH1-N177YT		1	FHNYTLDWAMDK	FHNYTLDWAMDK[837]	2	b	2	3	12	CRH1-N177YT	0	FALSE	0	0.99	FALSE	1
862	200.092	12	CRH1-N177YT		1	FHNYTLDWAMDK	FHNYTLDWAMDK[862]	2	b	2	3	12	CRH1-N177YT	0	FALSE	0	0.99	FALSE	1
887	200.092	12	CRH1-N177YT		1	FHNYTLDWAMDK	FHNYTLDWAMDK[887]	2	b	2	3	12	CRH1-N177YT	0	FALSE	0	0.99	FALSE	1
912	200.092	12	CRH1-N177YT		1	FHNYTLDWAMDK	FHNYTLDWAMDK[912]	2	b	2	3	12	CRH1-N177YT	0	FALSE	0	0.99	FALSE	1
937	200.092	12	CRH1-N177YT		1	FHNYTLDWAMDK	FHNYTLDWAMDK[937]	2	b	2	3	12	CRH1-N177YT	0	FALSE	0	0.99	FALSE	1
962	200.092	12	CRH1-N177YT		1	FHNYTLDWAMDK	FHNYTLDWAMDK[962]	2	b	2	3	12	CRH1-N177YT	0	FALSE	0	0.99	FALSE	1
987	200.092	12	CRH1-N177YT		1	FHNYTLDWAMDK	FHNYTLDWAMDK[987]	2	b	2	3	12	CRH1-N177YT	0	FALSE	0	0.99	FALSE	1
1012	200.092	12	CRH1-N177YT		1	FHNYTLDWAMDK	FHNYTLDWAMDK[1012]	2	b	2	3	12	CRH1-N177YT	0	FALSE	0	0.99	FALSE	1
1037	200.092	12	CRH1-N177YT		1	FHNYTLDWAMDK	FHNYTLDWAMDK[1037]	2	b	2	3	12	CRH1-N177YT	0	FALSE	0	0.99	FALSE	1
1062	200.092	12	CRH1-N177YT		1	FHNYTLDWAMDK	FHNYTLDWAMDK[1062]	2	b	2	3	12	CRH1-N177YT	0	FALSE	0	0.99	FALSE	1
1087	200.092	12	CRH1-N177YT		1	FHNYTLDWAMDK	FHNYTLDWAMDK[1087]	2	b	2	3	12	CRH1-N177YT	0	FALSE	0	0.99	FALSE	1
1112	200.092	12	CRH1-N177YT		1	FHNYTLDWAMDK	FHNYTLDWAMDK[1112]	2	b	2	3	12	CRH1-N177YT	0	FALSE	0	0.99	FALSE	1
1137	200.092	12	CRH1-N177YT		1	FHNYTLDWAMDK	FHNYTLDWAMDK[1137]	2	b	2	3	12	CRH1-N177YT	0	FALSE	0	0.99	FALSE	1
1162	200.092	12	CRH1-N177YT		1	FHNYTLDWAMDK	FHNYTLDWAMDK[1162]	2	b	2	3	12	CRH1-N177YT	0	FALSE	0	0.99	FALSE	1
1187	200.092	12	CRH1-N177YT		1	FHNYTLDWAMDK	FHNYTLDWAMDK[1187]	2	b	2	3	12	CRH1-N177YT	0	FALSE	0	0.99	FALSE	1
1212	200.092	12	CRH1-N177YT		1	FHNYTLDWAMDK	FHNYTLDWAMDK[1212]	2	b	2	3	12	CRH1-N177YT	0	FALSE	0	0.99	FALSE	1
1237	200.092	12	CRH1-N177YT		1	FHNYTLDWAMDK	FHNYTLDWAMDK[1237]	2	b	2	3	12	CRH1-N177YT	0	FALSE	0	0.99	FALSE	1
412.5	197.094	12	CRH1-N177YT		1	FHNYTLDWAMDK	FHNYTLDWAMDK[412]	2	y	2	3	12	CRH1-N177YT	0	FALSE	0	0.99	FALSE	1
437	197.094	12	CRH1-N177YT		1	FHNYTLDWAMDK	FHNYTLDWAMDK[437]	2	y	2	3	12	CRH1-N177YT	0	FALSE	0	0.99	FALSE	1
462	197.094	12	CRH1-N177YT		1	FHNYTLDWAMDK	FHNYTLDWAMDK[462]	2	y	2	3	12	CRH1-N177YT	0	FALSE	0	0.99	FALSE	1
487	197.094	12	CRH1-N177YT		1	FHNYTLDWAMDK	FHNYTLDWAMDK[487]	2	y	2	3	12	CRH1-N177YT	0	FALSE	0	0.99	FALSE	1
512	197.094	12	CRH1-N177YT		1	FHNYTLDWAMDK	FHNYTLDWAMDK[512]	2	y	2	3	12	CRH1-N177YT	0	FALSE	0	0.99	FALSE	1
537	197.094	12	CRH1-N177YT		1	FHNYTLDWAMDK	FHNYTLDWAMDK[537]	2	y	2	3	12	CRH1-N177YT	0	FALSE	0	0.99	FALSE	1
562	197.094	12	CRH1-N177YT		1	FHNYTLDWAMDK	FHNYTLDWAMDK[562]	2	y	2	3	12	CRH1-N177YT	0	FALSE	0	0.99	FALSE	1
587	197.094	12	CRH1-N177YT		1	FHNYTLDWAMDK	FHNYTLDWAMDK[587]	2	y	2	3	12	CRH1-N177YT	0	FALSE	0	0.99	FALSE	1
612	197.094	12	CRH1-N177YT		1	FHNYTLDWAMDK	FHNYTLDWAMDK[612]	2	y	2	3	12	CRH1-N177YT	0	FALSE	0	0.99	FALSE	1
637	197.094	12	CRH1-N177YT		1	FHNYTLDWAMDK	FHNYTLDWAMDK[637]	2	y	2	3	12	CRH1-N177YT	0	FALSE	0	0.99	FALSE	1
662	197.094	12	CRH1-N177YT		1	FHNYTLDWAMDK	FHNYTLDWAMDK[662]	2	y	2	3	12	CRH1-N177YT	0	FALSE	0	0.99	FALSE	1
687	197.094	12	CRH1-N177YT		1	FHNYTLDWAMDK	FHNYTLDWAMDK[687]	2	y	2	3	12	CRH1-N177YT	0	FALSE	0	0.99	FALSE	1
712	197.094	12	CRH1-N177YT		1	FHNYTLDWAMDK	FHNYTLDWAMDK[712]	2	y	2	3	12	CRH1-N177YT	0	FALSE	0	0.99	FALSE	1
737	197.094	12	CRH1-N177YT		1	FHNYTLDWAMDK	FHNYTLDWAMDK[737]	2	y	2	3	12	CRH1-N177YT	0	FALSE	0	0.99	FALSE	1
762	197.094	12	CRH1-N177YT		1	FHNYTLDWAMDK	FHNYTLDWAMDK[762]	2	y	2	3	12	CRH1-N177YT	0	FALSE	0	0.99	FALSE	1
787	197.094	12	CRH1-N177YT		1	FHNYTLDWAMDK	FHNYTLDWAMDK[787]	2	y	2	3	12	CRH1-N177YT	0	FALSE	0	0.99	FALSE	1
812	197.094	12	CRH1-N177YT		1	FHNYTLDWAMDK	FHNYTLDWAMDK[812]	2	y	2	3	12	CRH1-N177YT	0	FALSE	0	0.99	FALSE	1
837	197.094	12	CRH1-N177YT		1	FHNYTLDWAMDK	FHNYTLDWAMDK[837]	2	y	2	3	12	CRH1-N177YT	0	FALSE	0	0.99	FALSE	1
862	197.094	12	CRH1-N177YT		1	FHNYTLDWAMDK	FHNYTLDWAMDK[862]	2	y	2	3	12	CRH1-N177YT	0	FALSE	0	0.99	FALSE	1
887	197.094	12	CRH1-N177YT		1	FHNYTLDWAMDK	FHNYTLDWAMDK[887]	2	y	2	3	12	CRH1-N177YT	0	FALSE	0	0.99	FALSE	1
912	197.094	12	CRH1-N177YT		1	FHNYTLDWAMDK	FHNYTLDWAMDK[912]	2	y	2	3	12	CRH1-N177YT	0	FALSE	0	0.99	FALSE	1
937	197.094	12	CRH1-N177YT		1	FHNYTLDWAMDK	FHNYTLDWAMDK[937]	2	y	2	3	12	CRH1-N177YT	0	FALSE	0	0.99	FALSE	1
962	197.094	12	CRH1-N177YT		1	FHNYTLDWAMDK	FHNYTLDWAMDK[962]	2	y	2	3	12	CRH1-N177YT	0	FALSE	0	0.99	FALSE	1
987	197.094	12	CRH1-N177YT		1	FHNYTLDWAMDK	FHNYTLDWAMDK[987]	2	y	2	3	12	CRH1-N177YT	0	FALSE	0	0.99	FALSE	1
1012	197.094	12	CRH1-N177YT		1	FHNYTLDWAMDK	FHNYTLDWAMDK[1012]	2	y	2	3	12	CRH1-N177YT	0	FALSE	0	0.99	FALSE	1
1037	197.094	12	CRH1-N177YT		1	FHNYTLDWAMDK	FHNYTLDWAMDK[1037]	2	y	2	3	12	CRH1-N177YT	0	FALSE	0	0.99	FALSE	1
1062	197.094	12	CRH1-N177YT		1	FHNYTLDWAMDK	FHNYTLDWAMDK[1062]	2	y	2	3	12	CRH1-N177YT	0	FALSE	0	0.99	FALSE	1
1087	197.094	12	CRH1-N177YT		1	FHNYTLDWAMDK	FHNYTLDWAMDK[1087]	2	y	2	3	12	CRH1-N177YT	0	FALSE	0	0.99	FALSE	1
1112	197.094	12	CRH1-N177YT		1	FHNYTLDWAMDK	FHNYTLDWAMDK[1112]	2	y	2	3	12	CRH1-N177YT	0	FALSE	0	0.99	FALSE	1
1137	197.094	12	CRH1-N177YT		1	FHNYTLDWAMDK	FHNYTLDWAMDK[1137]	2	y	2	3	12	CRH1-N177YT	0	FALSE	0	0.99	FALSE	1
1162	197.094	12	CRH1-N177YT		1	FHNYTLDWAMDK	FHNYTLDWAMDK[1162]	2	y	2	3	12	CRH1-N177YT	0	FALSE	0	0.99	FALSE	1
1187	197.094	12	CRH1-N177YT		1	FHNYTLDWAMDK	FHNYTLDWAMDK[1187]	2	y	2	3	12	CRH1-N177YT	0	FALSE	0	0.99	FALSE	1
1212	197.094	12	CRH1-N177YT		1	FHNYTLDWAMDK	FHNYTLDWAMDK[1212]	2	y	2	3	12	CRH1-N177YT	0	FALSE	0	0.99	FALSE	1
1237	197.094	12	CRH1-N177YT		1	FHNYTLDWAMDK	FHNYTLDWAMDK[1237]	2	y	2	3	12	CRH1-N177YT	0	FALSE	0	0.99	FALSE	1
412.5	562.241	12	CRH1-N177YT		1	FHNYTLDWAMDK	FHNYTLDWAMDK[412]	2	b	1	4	12	CRH1-N177YT	0	FALSE	0	0.99	FALSE	1
437	562.241	12	CRH1-N177YT		1	FHNYTLDWAMDK	FHNYTLDWAMDK[437]	2	b	1	4	12	CRH1-N177YT	0	FALSE	0	0.99	FALSE	1
462	562.241	12	CRH1-N177YT		1	FHNYTLDWAMDK	FHNYTLDWAMDK[462]	2	b	1	4	12	CRH1-N177YT	0	FALSE	0	0.99	FALSE	1
487	562.241	12	CRH1-N177YT		1	FHNYTLDWAMDK	FHNYTLDWAMDK[487]	2	b	1	4	12	CRH1-N177YT	0	FALSE	0	0.99	FALSE	1
512	562.241	12	CRH1-N177YT		1	FHNYTLDWAMDK	FHNYTLDWAMDK[512]	2	b	1	4	12	CRH1-N177YT	0	FALSE	0	0.99	FALSE	1
537	562.241	12	CRH1-N177YT		1	FHNYTLDWAMDK	FHNYTLDWAMDK[537]	2	b	1	4	12	CRH1-N177YT	0	FALSE	0	0.99	FALSE	1
562	562.241	12	CRH1-N177YT		1	FHNYTLDWAMDK	FHNYTLDWAMDK[562]	2	b	1	4	12	CRH1-N177YT	0	FALSE	0	0.99	FALSE	1
587	562.241	12	CRH1-N177YT		1	FHNYTLDWAMDK	FHNYTLDWAMDK[587]	2	b	1	4	12	CRH1-N177YT	0	FALSE	0	0.99	FALSE	1
612	562.241	12	CRH1-N177YT		1	FHNYTLDWAMDK	FHNYTLDWAMDK[612]	2	b	1	4	12	CRH1-N177YT	0	FALSE	0	0.99	FALSE	1
637	562.241	12	CRH1-N177YT		1	FHNYTLDWAMDK	FHNYTLDWAMDK[637]	2	b	1	4	12	CRH1-N177YT	0	FALSE	0	0.99	FALSE	1
662	562.241	12	CRH1-N177YT		1	FHNYTLDWAMDK	FHNYTLDWAMDK[662]	2	b	1	4	12	CRH1-N177YT	0	FALSE	0	0.99	FALSE	1
687	562.241	12	CRH1-N177YT		1	FHNYTLDWAMDK	FHNYTLDWAMDK[687]	2	b	1	4	12	CRH1-N177YT	0	FALSE	0	0.99	FALSE	1
712	562.241	12	CRH1-N177YT		1	FHNYTLDWAMDK	FHNYTLDWAMDK[712]	2	b	1	4	12	CRH1-N177YT	0	FALSE	0	0.99	FALSE	1
737	562.241	12	CRH1-N177YT		1	FHNYTLDWAMDK	FHNYTLDWAMDK[737]	2	b	1	4	12	CRH1-N177YT	0	FALSE	0	0.99	FALSE	1
762	562.241	12	CRH1-N177YT		1	FHNYTLDWAMDK	FHNYTLDWAMDK[762]	2	b	1	4	12	CRH1-N177YT	0	FALSE	0	0.99	FALSE	1
787	562.241	12	CRH1-N177YT		1	FHNYTLDWAMDK	FHNYTLDWAMDK[787]	2	b	1	4	12	CRH1-N177YT	0	FALSE	0	0.99	FALSE	1
812	562.241	12	CRH1-N177YT		1	FHNYTLDWAMDK	FHNYTLDWAMDK[812]	2	b	1	4	12	CRH1-N177YT	0	FALSE	0	0.99	FALSE	1
837	562.241	12	CRH1-N177YT		1	FHNYTLDWAMDK	FHNYTLDWAMDK[837]	2	b	1	4	12	CRH1-N177YT	0	FALSE	0	0.99	FALSE	1
862	562.241	12	CRH1-N177YT		1	FHNYTLDWAMDK	FHNYTLDWAMDK[862]	2	b	1	4	12	CRH1-N177YT	0	FALSE	0	0.99	FALSE	1
887	562.241	12	CRH1-N177YT		1	FHNYTLDWAMDK	FHNYTLDWAMDK[887]	2	b	1	4	12	CRH1-N177YT	0	FALSE	0	0.99	FALSE	1
912	562.241	12	CRH1-N177YT		1	FHNYTLDWAMDK	FHNYTLDWAMDK[912]	2	b	1	4	12	CRH1-N177YT	0	FALSE	0	0.99	FALSE	1
937	562.241	12	CRH1-N177YT		1	FHNYTLDWAMDK	FHNYTLDWAMDK[937]	2	b	1	4	12	CRH1-N177YT	0	FALSE	0	0.99	FALSE	1
962	562.241	12	CRH1-N177YT		1	FHNYTLDWAMDK	FHNYTLDWAMDK[962]	2	b	1	4	12	CRH1-N177YT	0	FALSE	0	0.99	FALSE	1
987	562.241	12	CRH1-N177YT		1	FHNYTLDWAMDK	FHNYTLDWAMDK[987]	2	b	1	4	12	CRH1-N177YT	0	FALSE	0	0.99	FALSE	1
1012	562.241	12	CRH1-N177YT		1	FHNYTLDWAMDK	FHNYTLDWAMDK[1012]	2	b	1	4	12	CRH1-N177YT	0	FALSE	0	0.99	FALSE	1
1037	562.241	12	CRH1-N177YT		1	FHNYTLDWAMDK	FHNYTLDWAMDK[1037]	2	b	1	4	12	CRH1-N177YT	0	FALSE	0	0.99	FALSE	1
1062	562.241	12	CRH1-N177YT		1	FHNYTLDWAMDK	FHNYTLDWAMDK[1062]	2	b	1	4	12	CRH1-N177YT	0	FALSE	0	0.99	FALSE	1
1087	562.241	12	CRH1-N177YT		1	FHNYTLDWAMDK	FHNYTLDWAMDK[1087]	2	b	1	4	12	CRH1-N177YT	0	FALSE	0	0.99	FALSE	1
1112	562.241	12	CRH1-N177YT		1	FHNYTLDWAMDK	FHNYTLDWAMDK[1112]	2	b	1	4	12	CRH1-N177YT	0	FALSE	0	0.99	FALSE	1
1137	562.241	12	CRH1-N177YT		1	FHNYTLDWAMDK	FHNYTLDWAMDK[1137]	2	b	1	4	12	CRH1-N177YT	0	FALSE	0	0.99	FALSE	1
1162	562.241	12	CRH1-N177YT		1	FHNYTLDWAMDK	FHNYTLDWAMDK[1162]	2	b	1	4	12	CRH1-N177YT	0	FALSE	0	0.99	FALSE	1
1187	562.241	12	CRH1-N177YT		1	FHNYTLDWAMDK	FHNYTLDWAMDK[1187]	2	b	1	4	12	CRH1-N177YT	0	FALSE	0	0.99	FALSE	1
1212	562.241	12	CRH1-N177YT		1	FHNYTLDWAMDK	FHNYTLDWAMDK[1212]	2	b	1	4	12	CRH1-N177YT	0	FALSE	0	0.99	FALSE	1
1237	562.241	12	CRH1-N177YT		1	FHNYTLDWAMDK	FHNYTLDWAMDK[1237]	2	b	1	4	12	CRH1-N177YT	0	FALSE	0	0.99	FALSE	1
412.5	464.217	12	CRH1-N177YT		1	FHNYTLDWAMDK	FHNYTLDWAMDK[412]	2	y	1	4	12	CRH1-N177YT	0	FALSE	0	0.99	FALSE	1
437	464.217	12	CRH1-N177YT		1	FHNYTLDWAMDK	FHNYTLDWAMDK[437]	2	y	1	4	12	CRH1-N177YT	0	FALSE	0	0.99	FALSE	1
462	464.217	12	CRH1-N177YT		1	FHNYTLDWAMDK	FHNYTLDWAMDK[462]	2	y	1	4	12	CRH1-N177YT	0	FALSE	0	0.99	FALSE	1
487	464.217	12	CRH1-N177YT		1	FHNYTLDWAMDK	FHNYTLDWAMDK[487]	2	y	1	4	12	CRH1-N177YT	0	FALSE	0	0.99	FALSE	1
512	464.217	12	CRH1-N177YT		1	FHNYTLDWAMDK	FHNYTLDWAMDK[512]	2	y	1	4	12	CRH1-N177YT	0	FALSE	0	0.99	FALSE	1
537	464.217	12	CRH1-N177YT		1	FHNYTLDWAMDK	FHNYTLDWAMDK[537]	2	y	1	4	12	CRH1-N177YT	0	FALSE	0	0.99	FALSE	1
562	464.217	12	CRH1-N177YT		1	FHNYTLDWAMDK	FHNYTLDWAMDK[562]	2	y	1	4	12	CRH1-N177YT	0	FALSE	0	0.99	FALSE	1
587	464.217	12	CRH1-N177YT		1	FHNYTLDWAMDK	FHNYTLDWAMDK[587]	2	y	1	4	12	CRH1-N177YT	0	FALSE	0	0.99	FALSE	1
612	464.217	12	CRH1-N177YT		1	FHNYTLDWAMDK	FHNYTLDWAMDK[612]	2	y	1	4	12	CRH1-N177YT	0	FALSE	0	0.99	FALSE	1
637	464.217	12	CRH1-N177YT		1	FHNYTLDWAMDK	FHNYTLDWAMDK[637]	2	y	1	4	12	CRH1-N177YT	0	FALSE	0	0.99	FALSE	1
662	464.217	12	CRH1-N177YT		1	FHNYTLDWAMDK	FHNYTLDWAMDK[662]	2	y	1	4	12	CRH1-N177YT	0	FALSE	0	0.99	FALSE	1
687	464.217	12	CRH1-N177YT		1	FHNYTLDWAMDK	FHNYTLDWAMDK[687]	2	y	1	4	12	CRH1-N177YT	0	FALSE	0	0.99	FALSE	1
712	464.217	12	CRH1-N177YT		1	FHNYTLDWAMDK	FHNYTLDWAMDK[712]	2	y	1	4	12	CRH1-N177YT	0	FALSE	0	0.99	FALSE	1
737	464.217	12	CRH1-N177YT		1	FHNYTLDWAMDK	FHNYTLDWAMDK[737]	2	y	1	4	12	CRH1-N177YT	0	FALSE	0	0.99	FALSE	1
762	464.217	12	CRH1-N177YT		1	FHNYTLDWAMDK	FHNYTLDWAMDK[762]	2	y	1	4	12	CRH1-N177YT	0	FALSE	0	0.99	FALSE	1
787	464.217	12	CRH1-N177YT		1	FHNYTLDWAMDK	FHNYTLDWAMDK[787]	2	y	1	4	12	CRH1-N177YT	0	FALSE	0	0.99	FALSE	1
812	464.217	12	CRH1-N177YT		1	FHNYTLDWAMDK	FHNYTLDWAMDK[812]	2	y	1	4	12	CRH1-N177YT	0	FALSE	0	0.99	FALSE	1
837	464.217	12	CRH1-N177YT		1	FHNYTLDWAMDK	FHNYTLDWAMDK[837]	2	y	1	4	12	CRH1-N177YT	0	FALSE	0	0.99	FALSE	1
862	464.217	12	CRH1-N177YT		1	FHNYTLDWAMDK	FHNYTLDWAMDK[862]	2	y	1	4	12	CRH1-N177YT	0	FALSE	0	0.99	FALSE	1
887	464.217	12	CRH1-N177YT		1	FHNYTLDWAMDK	FHNYTLDWAMDK[887]	2	y	1	4	12	CRH1-N177YT	0	FALSE	0	0.99	FALSE	1
912	464.217	12	CRH1-N177YT		1	FHNYTLDWAMDK	FHNYTLDWAMDK[912]	2	y	1	4	12	CRH1-N177YT	0	FALSE	0	0.99	FALSE	1
937	464.217	12	CRH1-N177YT		1	FHNYTLDWAMDK	FHNYTLDWAMDK[937]	2	y	1	4	12	CRH1-N177YT	0	FALSE	0	0.99	FALSE	1
962	464.217	12	CRH1-N177YT		1	FHNYTLDWAMDK	FHNYTLDWAMDK[962]	2	y	1	4	12	CRH1-N177YT	0	FALSE	0	0.99	FALSE	1
987	464.217	12	CRH1-N177YT		1	FHNYTLDWAMDK	FHNYTLDWAMDK[987]	2	y	1	4	12	CRH1-N177YT	0	FALSE	0	0.99	FALSE	1
1012	464.217	12	CRH1-N177YT		1	FHNYTLDWAMDK	FHNYTLDWAMDK[1012]	2	y	1	4	12	CRH1-N177YT	0	FALSE	0	0.99	FALSE	1
1037	464.217	12	CRH1-N177YT		1	FHNYTLDWAMDK	FHNYTLDWAMDK[1037]	2	y	1	4	12	CRH1-N177YT	0	FALSE	0	0.99	FALSE	1
1062	464.217	12	CRH1-N177YT		1	FHNYTLDWAMDK	FHNYTLDWAMDK[1062]	2	y	1	4	12	CRH1-N177YT	0	FALSE	0	0.99	FALSE	1
1087	464.217	12	CRH1-N177YT		1	FHNYTLDWAMDK	FHNYTLDWAMDK[1087]	2	y	1	4	12	CRH1-N177YT	0	FALSE	0	0.99	FALSE	1
1112	464.217	12	CRH1-N177YT		1	FHNYTLDWAMDK	FHNYTLDWAMDK[1112]	2	y	1	4	12	CRH1-N177YT	0	FALSE	0	0.99	FALSE	1
1137	464.217	12	CRH1-N177YT		1	FHNYTLDWAMDK	FHNYTLDWAMDK[1137]	2	y	1	4	12	CRH1-N177YT	0	FALSE	0	0.99	FALSE	1
1162	464.217	12	CRH1-N177YT		1	FHNYTLDWAMDK	FHNYTLDWAMDK[1162]	2	y	1	4	12	CRH1-N177YT	0	FALSE	0	0.99	FALSE	1
1187	464.217	12	CRH1-N177YT		1	FHNYTLDWAMDK	FHNYTLDWAMDK[1187]	2	y	1	4	12	CRH1-N177YT	0	FALSE	0	0.99	FALSE	1
1212	464.217	12	CRH1-N177YT		1	FHNYTLDWAMDK	FHNYTLDWAMDK[1212]	2	y	1	4	12	CRH1-N177YT	0	FALSE	0	0.99	FALSE	1
1237	464.217	12	CRH1-N177YT		1	FHNYTLDWAMDK	FHNYTLDWAMDK[1237]	2	y	1	4	12	CRH1-N177YT	0	FALSE	0	0.99	FALSE	1
412.5	281.624	12	CRH1-N177YT		1	FHNYTLDWAMDK	FHNYTLDWAMDK[412]	2	b	2	4	12	CRH1-N177YT	0	FALSE	0	0.99	FALSE	1
437	281.624	12	CRH1-N177YT		1	FHNYTLDWAMDK	FHNYTLDWAMDK[437]	2	b	2	4	12	CRH1-N177YT	0	FALSE	0	0.99	FALSE	1
462	281.624	12	CRH1-N177YT		1	FHNYTLDWAMDK	FHNYTLDWAMDK[462]	2	b	2	4	12	CRH1-N177YT	0	FALSE	0	0.99	FALSE	1
487	281.624	12	CRH1-N177YT		1	FHNYTLDWAMDK	FHNYTLDWAMDK[487]	2	b	2	4	12	CRH1-N177YT	0	FALSE	0	0.99	FALSE	1
512	281.624	12	CRH1-N177YT		1	FHNYTLDWAMDK	FHNYTLDWAMDK[512]	2	b	2	4	12	CRH1-N177YT	0	FALSE	0	0.99	FALSE	1
537	281.624	12	CRH1-N177YT		1	FHNYTLDWAMDK	FHNYTLDWAMDK[537]	2	b	2	4	12	CRH1-N177YT	0	FALSE	0	0.99	FALSE	1
562	281.624	12	CRH1-N177YT		1	FHNYTLDWAMDK	FHNYTLDWAMDK[562]	2	b	2	4	12	CRH1-N177YT	0	FALSE	0	0.99	FALSE	1
587	281.624	12	CRH1-N177YT		1	FHNYTLDWAMDK	FHNYTLDWAMDK[587]	2	b	2	4	12	CRH1-N177YT	0	FALSE	0	0.99	FALSE	1
612	281.624	12	CRH1-N177YT		1	FHNYTLDWAMDK	FHNYTLDWAMDK[612]	2	b	2	4	12	CRH1-N177YT	0	FALSE	0	0.99	FALSE	1
637	281.624	12	CRH1-N177YT		1	FHNYTLDWAMDK	FHNYTLDWAMDK[637]	2	b	2	4	12	CRH1-N177YT	0	FALSE	0	0.99	FALSE	1
662	281.624	12	CRH1-N177YT		1	FHNYTLDWAMDK	FHNYTLDWAMDK[662]	2	b	2	4	12	CRH1-N177YT	0	FALSE	0	0.99	FALSE	1
687	281.624	12	CRH1-N177YT		1	FHNYTLDWAMDK	FHNYTLDWAMDK[687]	2	b	2	4	12	CRH1-N177YT	0	FALSE	0	0.99	FALSE	1
712	281.624	12	CRH1-N177YT		1	FHNYTLDWAMDK	FHNYTLDWAMDK[712]	2	b	2	4	12	CRH1-N177YT	0	FALSE	0	0.99	FALSE	1
737	281.624	12	CRH1-N177YT		1	FHNYTLDWAMDK	FHNYTLDWAMDK[737]	2	b	2	4	12	CRH1-N177YT	0	FALSE	0	0.99	FALSE	1
762	281.624	12	CRH1-N177YT		1	FHNYTLDWAMDK	FHNYTLDWAMDK[762]	2	b	2	4	12	CRH1-N177YT	0	FALSE	0	0.99	FALSE	1
787	281.624	12	CRH1-N177YT		1	FHNYTLDWAMDK	FHNYTLDWAMDK[787]	2	b	2	4	12	CRH1-N177YT	0	FALSE	0	0.99	FALSE	1
812	281.624	12	CRH1-N177YT		1	FHNYTLDWAMDK	FHNYTLDWAMDK[812]	2	b	2	4	12	CRH1-N177YT	0	FALSE	0	0.99	FALSE	1
837	281.624	12	CRH1-N177YT		1	FHNYTLDWAMDK	FHNYTLDWAMDK[837]	2	b	2	4	12	CRH1-N177YT	0	FALSE	0	0.99	FALSE	1
862	281.624	12	CRH1-N177YT		1	FHNYTLDWAMDK	FHNYTLDWAMDK[862]	2	b	2	4	12	CRH1-N177YT	0	FALSE	0	0.99	FALSE	1
887	281.624	12	CRH1-N177YT		1	FHNYTLDWAMDK	FHNYTLDWAMDK[887]	2	b	2	4	12	CRH1-N177YT	0	FALSE	0	0.99	FALSE	1
912	281.624	12	CRH1-N177YT		1	FHNYTLDWAMDK	FHNYTLDWAMDK[912]	2	b	2	4	12	CRH1-N177YT	0	FALSE	0	0.99	FALSE	1
937	281.624	12	CRH1-N177YT		1	FHNYTLDWAMDK	FHNYTLDWAMDK[937]	2	b	2	4	12	CRH1-N177YT	0	FALSE	0	0.99	FALSE	1
962	281.624	12	CRH1-N177YT		1	FHNYTLDWAMDK	FHNYTLDWAMDK[962]	2	b	2	4	12	CRH1-N177YT	0	FALSE	0	0.99	FALSE	1
987	281.624	12	CRH1-N177YT		1	FHNYTLDWAMDK	FHNYTLDWAMDK[987]	2	b	2	4	12	CRH1-N177YT	0	FALSE	0	0.99	FALSE	1
1012	281.624	12	CRH1-N177YT		1	FHNYTLDWAMDK	FHNYTLDWAMDK[1012]	2	b	2	4	12	CRH1-N177YT	0	FALSE	0	0.99	FALSE	1
1037	281.624	12	CRH1-N177YT		1	FHNYTLDWAMDK	FHNYTLDWAMDK[1037]	2	b	2	4	12	CRH1-N177YT	0	FALSE	0	0.99	FALSE	1
1062	281.624	12	CRH1-N177YT		1	FHNYTLDWAMDK	FHNYTLDWAMDK[1062]	2	b	2	4	12	CRH1-N177YT	0	FALSE	0	0.99	FALSE	1
1087	281.624	12	CRH1-N177YT		1	FHNYTLDWAMDK	FHNYTLDWAMDK[1087]	2	b	2	4	12	CRH1-N177YT	0	FALSE	0	0.99	FALSE	1
1112	281.624	12	CRH1-N177YT		1	FHNYTLDWAMDK	FHNYTLDWAMDK[1112]	2	b	2	4	12	CRH1-N177YT	0	FALSE	0	0.99	FALSE	1
1137	281.624	12	CRH1-N177YT		1	FHNYTLDWAMDK	FHNYTLDWAMDK[1137]	2	b	2	4	12	CRH1-N177YT	0	FALSE	0	0.99	FALSE	1
1162	281.624	12	CRH1-N177YT		1	FHNYTLDWAMDK	FHNYTLDWAMDK[1162]	2	b	2	4	12	CRH1-N177YT	0	FALSE	0	0.99	FALSE	1
1187	281.624	12	CRH1-N177YT		1	FHNYTLDWAMDK	FHNYTLDWAMDK[1187]	2	b	2	4	12	CRH1-N177YT	0	FALSE	0	0.99	FALSE	1
1212	281.624	12	CRH1-N177YT		1	FHNYTLDWAMDK	FHNYTLDWAMDK[1212]	2	b	2	4	12	CRH1-N177YT	0	FALSE	0	0.99	FALSE	1
1237	281.624	12	CRH1-N177YT		1	FHNYTLDWAMDK	FHNYTLDWAMDK[1237]	2	b	2	4	12	CRH1-N177YT	0	FALSE	0	0.99	FALSE	1
412.5	232.612	12	CRH1-N177YT		1	FHNYTLDWAMDK	FHNYTLDWAMDK[412]	2	y	2	4	12	CRH1-N177YT	0	FALSE	0	0.99	FALSE	1
437	232.612	12	CRH1-N177YT		1	FHNYTLDWAMDK	FHNYTLDWAMDK[437]	2	y	2	4	12	CRH1-N177YT	0	FALSE	0	0.99	FALSE	1
462	232.612	12	CRH1-N177YT		1	FHNYTLDWAMDK	FHNYTLDWAMDK[462]	2	y	2	4	12	CRH1-N177YT	0	FALSE	0	0.99	FALSE	1
487	232.612	12	CRH1-N177YT		1	FHNYTLDWAMDK	FHNYTLDWAMDK[487]	2	y	2	4	12	CRH1-N177YT	0	FALSE	0	0.99	FALSE	1
512	232.612	12	CRH1-N177YT		1	FHNYTLDWAMDK	FHNYTLDWAMDK[512]	2	y	2	4	12	CRH1-N177YT	0	FALSE	0	0.99	FALSE	1
537	232.612	12	CRH1-N177YT		1	FHNYTLDWAMDK	FHNYTLDWAMDK[537]	2	y	2	4	12	CRH1-N177YT	0	FALSE	0	0.99	FALSE	1
562	232.612	12	CRH1-N177YT		1	FHNYTLDWAMDK	FHNYTLDWAMDK[562]	2	y	2	4	12	CRH1-N177YT	0	FALSE	0	0.99	FALSE	1
587	232.612	12	CRH1-N177YT		1	FHNYTLDWAMDK	FHNYTLDWAMDK[587]	2	y	2	4	12	CRH1-N177YT	0	FALSE	0	0.99	FALSE	1
612	232.612	12	CRH1-N177YT		1	FHNYTLDWAMDK	FHNYTLDWAMDK[612]	2	y	2	4	12	CRH1-N177YT	0	FALSE	0	0.99	FALSE	1
637	232.612	12	CRH1-N177YT		1	FHNYTLDWAMDK	FHNYTLDWAMDK[637]	2	y	2	4	12	CRH1-N177YT	0	FALSE	0	0.99	FALSE	1
662	232.612	12	CRH1-N177YT		1	FHNYTLDWAMDK	FHNYTLDWAMDK[662]	2	y	2	4	12	CRH1-N177YT	0	FALSE	0	0.99	FALSE	1
687	232.612	12	CRH1-N177YT		1	FHNYTLDWAMDK	FHNYTLDWAMDK[687]	2	y	2	4	12	CRH1-N177YT	0	FALSE	0	0.99	FALSE	1
712	232.612	12	CRH1-N177YT		1	FHNYTLDWAMDK	FHNYTLDWAMDK[712]	2	y	2	4	12	CRH1-N177YT	0	FALSE	0	0.99	FALSE	1
737	232.612	12	CRH1-N177YT		1	FHNYTLDWAMDK	FHNYTLDWAMDK[737]	2	y	2	4	12	CRH1-N177YT	0	FALSE	0	0.99	FALSE	1
762	232.612	12	CRH1-N177YT		1	FHNYTLDWAMDK	FHNYTLDWAMDK[762]	2	y	2	4	12	CRH1-N177YT	0	FALSE	0	0.99	FALSE	1
787	232.612	12	CRH1-N177YT		1	FHNYTLDWAMDK	FHNYTLDWAMDK[787]	2	y	2	4	12	CRH1-N177YT	0	FALSE	0	0.99	FALSE	1
812	232.612	12	CRH1-N177YT		1	FHNYTLDWAMDK	FHNYTLDWAMDK[812]	2	y	2	4	12	CRH1-N177YT	0	FALSE	0	0.99	FALSE	1
837	232.612	12	CRH1-N177YT		1	FHNYTLDWAMDK	FHNYTLDWAMDK[837]	2	y	2	4	12	CRH1-N177YT	0	FALSE	0	0.99	FALSE	1
862	232.612	12	CRH1-N177YT		1	FHNYTLDWAMDK	FHNYTLDWAMDK[862]	2	y	2	4	12	CRH1-N177YT	0	FALSE	0	0.99	FALSE	1
887	232.612	12	CRH1-N177YT		1	FHNYTLDWAMDK	FHNYTLDWAMDK[887]	2	y	2	4	12	CRH1-N177YT	0	FALSE	0	0.99	FALSE	1
912	232.612	12	CRH1-N177YT		1	FHNYTLDWAMDK	FHNYTLDWAMDK[912]	2	y	2	4	12	CRH1-N177YT	0	FALSE	0	0.99	FALSE	1
937	232.612	12	CRH1-N177YT		1	FHNYTLDWAMDK	FHNYTLDWAMDK[937]	2	y	2	4	12	CRH1-N177YT	0	FALSE	0	0.99	FALSE	1
962	232.612	12	CRH1-N177YT		1	FHNYTLDWAMDK	FHNYTLDWAMDK[962]	2	y	2	4	12	CRH1-N177YT	0	FALSE	0	0.99	FALSE	1
987	232.612	12	CRH1-N177YT		1	FHNYTLDWAMDK	FHNYTLDWAMDK[987]	2	y	2	4	12	CRH1-N177YT	0	FALSE	0	0.99	FALSE	1
1012	232.612	12	CRH1-N177YT		1	FHNYTLDWAMDK	FHNYTLDWAMDK[1012]	2	y	2	4	12	CRH1-N177YT	0	FALSE	0	0.99	FALSE	1
1037	232.612	12	CRH1-N177YT		1	FHNYTLDWAMDK	FHNYTLDWAMDK[1037]	2	y	2	4	12	CRH1-N177YT	0	FALSE	0	0.99	FALSE	1
1062	232.612	12	CRH1-N177YT		1	FHNYTLDWAMDK	FHNYTLDWAMDK[1062]	2	y	2	4	12	CRH1-N177YT	0	FALSE	0	0.99	FALSE	1
1087	232.612	12	CRH1-N177YT		1	FHNYTLDWAMDK	FHNYTLDWAMDK[1087]	2	y	2	4	12	CRH1-N177YT	0	FALSE	0	0.99	FALSE	1
1112	232.612	12	CRH1-N177YT		1	FHNYTLDWAMDK	FHNYTLDWAMDK[1112]	2	y	2	4	12	CRH1-N177YT	0	FALSE	0	0.99	FALSE	1
1137	232.612	12	CRH1-N177YT		1	FHNYTLDWAMDK	FHNYTLDWAMDK[1137]	2	y	2	4	12	CRH1-N177YT	0	FALSE	0	0.99	FALSE	1
1162	232.612	12	CRH1-N177YT		1	FHNYTLDWAMDK	FHNYTLDWAMDK[1162]	2	y	2	4	12	CRH1-N177YT	0	FALSE	0	0.99	FALSE	1
1187	232.612	12	CRH1-N177YT		1	FHNYTLDWAMDK	FHNYTLDWAMDK[1187]	2	y	2	4	12	CRH1-N177YT	0	FALSE	0	0.99	FALSE	1
1212	232.612	12	CRH1-N177YT		1	FHNYTLDWAMDK	FHNYTLDWAMDK[1212]	2	y	2	4	12	CRH1-N177YT	0	FALSE	0	0.99	FALSE	1
1237	232.612	12	CRH1-N177YT		1	FHNYTLDWAMDK	FHNYTLDWAMDK[1237]	2	y	2	4	12	CRH1-N177YT	0	FALSE	0	0.99	FALSE	1
412.5	663.288	12	CRH1-N177YT		1	FHNYTLDWAMDK	FHNYTLDWAMDK[412]	2	b	1	5	12	CRH1-N177YT	0	FALSE	0	0.99	FALSE	1
437	663.288	12	CRH1-N177YT		1	FHNYTLDWAMDK	FHNYTLDWAMDK[437]	2	b	1	5	12	CRH1-N177YT	0	FALSE	0	0.99	FALSE	1
462	663.288	12	CRH1-N177YT		1	FHNYTLDWAMDK	FHNYTLDWAMDK[462]	2	b	1	5	12	CRH1-N177YT	0	FALSE	0	0.99	FALSE	1
487	663.288	12	CRH1-N177YT		1	FHNYTLDWAMDK	FHNYTLDWAMDK[487]	2	b	1	5	12	CRH1-N177YT	0	FALSE	0	0.99	FALSE	1
512	663.288	12	CRH1-N177YT		1	FHNYTLDWAMDK	FHNYTLDWAMDK[512]	2	b	1	5	12	CRH1-N177YT	0	FALSE	0	0.99	FALSE	1
537	663.288	12	CRH1-N177YT		1	FHNYTLDWAMDK	FHNYTLDWAMDK[537]	2	b	1	5	12	CRH1-N177YT	0	FALSE	0	0.99	FALSE	1
562	663.288	12	CRH1-N177YT		1	FHNYTLDWAMDK	FHNYTLDWAMDK[562]	2	b	1	5	12	CRH1-N177YT	0	FALSE	0	0.99	FALSE	1
587	663.288	12	CRH1-N177YT		1	FHNYTLDWAMDK	FHNYTLDWAMDK[587]	2	b	1	5	12	CRH1-N177YT	0	FALSE	0	0.99	FALSE	1
612	663.288	12	CRH1-N177YT		1	FHNYTLDWAMDK	FHNYTLDWAMDK[612]	2	b	1	5	12	CRH1-N177YT	0	FALSE	0	0.99	FALSE	1
637	663.288	12	CRH1-N177YT		1	FHNYTLDWAMDK	FHNYTLDWAMDK[637]	2	b	1	5	12	CRH1-N177YT	0	FALSE	0	0.99	FALSE	1
662	663.288	12	CRH1-N177YT		1	FHNYTLDWAMDK	FHNYTLDWAMDK[662]	2	b	1	5	12	CRH1-N177YT	0	FALSE	0	0.99	FALSE	1
687	663.288	12	CRH1-N177YT		1	FHNYTLDWAMDK	FHNYTLDWAMDK[687]	2	b	1	5	12	CRH1-N177YT	0	FALSE	0	0.99	FALSE	1
712	663.288	12	CRH1-N177YT		1	FHNYTLDWAMDK	FHNYTLDWAMDK[712]	2	b	1	5	12	CRH1-N177YT	0	FALSE	0	0.99	FALSE	1
737	663.288	12	CRH1-N177YT		1	FHNYTLDWAMDK	FHNYTLDWAMDK[737]	2	b	1	5	12	CRH1-N177YT	0	FALSE	0	0.99	FALSE	1
762	663.288	12	CRH1-N177YT		1	FHNYTLDWAMDK	FHNYTLDWAMDK[762]	2	b	1	5	12	CRH1-N177YT	0	FALSE	0	0.99	FALSE	1
787	663.288	12	CRH1-N177YT		1	FHNYTLDWAMDK	FHNYTLDWAMDK[787]	2	b	1	5	12	CRH1-N177YT	0	FALSE	0	0.99	FALSE	1
812	663.288	12	CRH1-N177YT		1	FHNYTLDWAMDK	FHNYTLDWAMDK[812]	2	b	1	5	12	CRH1-N177YT	0	FALSE	0	0.99	FALSE	1
837	663.288	12	CRH1-N177YT		1	FHNYTLDWAMDK	FHNYTLDWAMDK[837]	2	b	1	5	12	CRH1-N177YT	0	FALSE	0	0.99	FALSE	1
862	663.288	12	CRH1-N177YT		1	FHNYTLDWAMDK	FHNYTLDWAMDK[862]	2	b	1	5	12	CRH1-N177YT	0	FALSE	0	0.99	FALSE	1
887	663.288	12	CRH1-N177YT		1	FHNYTLDWAMDK	FHNYTLDWAMDK[887]	2	b	1	5	12	CRH1-N177YT	0	FALSE	0	0.99	FALSE	1
912	663.288	12	CRH1-N177YT		1	FHNYTLDWAMDK	FHNYTLDWAMDK[912]	2	b	1	5	12	CRH1-N177YT	0	FALSE	0	0.99	FALSE	1
937	663.288	12	CRH1-N177YT		1	FHNYTLDWAMDK	FHNYTLDWAMDK[937]	2	b	1	5	12	CRH1-N177YT	0	FALSE	0	0.99	FALSE	1
962	663.288	12	CRH1-N177YT		1	FHNYTLDWAMDK	FHNYTLDWAMDK[962]	2	b	1	5	12	CRH1-N177YT	0	FALSE	0	0.99	FALSE	1
987	663.288	12	CRH1-N177YT		1	FHNYTLDWAMDK	FHNYTLDWAMDK[987]	2	b	1	5	12	CRH1-N177YT	0	FALSE	0	0.99	FALSE	1
1012	663.288	12	CRH1-N177YT		1	FHNYTLDWAMDK	FHNYTLDWAMDK[1012]	2	b	1	5	12	CRH1-N177YT	0	FALSE	0	0.99	FALSE	1
1037	663.288	12	CRH1-N177YT		1	FHNYTLDWAMDK	FHNYTLDWAMDK[1037]	2	b	1	5	12	CRH1-N177YT	0	FALSE	0	0.99	FALSE	1
1062	663.288	12	CRH1-N177YT		1	FHNYTLDWAMDK	FHNYTLDWAMDK[1062]	2	b	1	5	12	CRH1-N177YT	0	FALSE	0	0.99	FALSE	1
1087	663.288	12	CRH1-N177YT		1	FHNYTLDWAMDK	FHNYTLDWAMDK[1087]	2	b	1	5	12	CRH1-N177YT	0	FALSE	0	0.99	FALSE	1
1112	663.288	12	CRH1-N177YT		1	FHNYTLDWAMDK	FHNYTLDWAMDK[1112]	2	b	1	5	12	CRH1-N177YT	0	FALSE	0	0.99	FALSE	1
1137	663.288	12	CRH1-N177YT		1	FHNYTLDWAMDK	FHNYTLDWAMDK[1137]	2	b	1	5	12	CRH1-N177YT	0	FALSE	0	0.99	FALSE	1
1162	663.288	12	CRH1-N177YT		1	FHNYTLDWAMDK	FHNYTLDWAMDK[1162]	2	b	1	5	12	CRH1-N177YT	0	FALSE	0	0.99	FALSE	1
1187	663.288	12	CRH1-N177YT		1	FHNYTLDWAMDK	FHNYTLDWAMDK[1187]	2	b	1	5	12	CRH1-N177YT	0	FALSE	0	0.99	FALSE	1
1212	663.288	12	CRH1-N177YT		1	FHNYTLDWAMDK	FHNYTLDWAMDK[1212]	2	b	1	5	12	CRH1-N177YT	0	FALSE	0	0.99	FALSE	1
1237	663.288	12	CRH1-N177YT		1	FHNYTLDWAMDK	FHNYTLDWAMDK[1237]	2	b	1	5	12	CRH1-N177YT	0	FALSE	0	0.99	FALSE	1
412.5	650.297	12	CRH1-N177YT		1	FHNYTLDWAMDK	FHNYTLDWAMDK[412]	2	y	1	5	12	CRH1-N177YT	0	FALSE	0	0.99	FALSE	1
437	650.297	12	CRH1-N177YT		1	FHNYTLDWAMDK	FHNYTLDWAMDK[437]	2	y	1	5	12	CRH1-N177YT	0	FALSE	0	0.99	FALSE	1
462	650.297	12	CRH1-N177YT		1	FHNYTLDWAMDK	FHNYTLDWAMDK[462]	2	y	1	5	12	CRH1-N177YT	0	FALSE	0	0.99	FALSE	1
487	650.297	12	CRH1-N177YT		1	FHNYTLDWAMDK	FHNYTLDWAMDK[487]	2	y	1	5	12	CRH1-N177YT	0	FALSE	0	0.99	FALSE	1
512	650.297	12	CRH1-N177YT		1	FHNYTLDWAMDK	FHNYTLDWAMDK[512]	2	y	1	5	12	CRH1-N177YT	0	FALSE	0	0.99	FALSE	1
537	650.297	12	CRH1-N177YT		1	FHNYTLDWAMDK	FHNYTLDWAMDK[537]	2	y	1	5	12	CRH1-N177YT	0	FALSE	0	0.99	FALSE	1
562	650.297	12	CRH1-N177YT		1	FHNYTLDWAMDK	FHNYTLDWAMDK[562]	2	y	1	5	12	CRH1-N177YT	0	FALSE	0	0.99	FALSE	1
587	650.297	12	CRH1-N177YT		1	FHNYTLDWAMDK	FHNYTLDWAMDK[587]	2	y	1	5	12	CRH1-N177YT	0	FALSE	0	0.99	FALSE	1
612	650.297	12	CRH1-N177YT		1	FHNYTLDWAMDK	FHNYTLDWAMDK[612]	2	y	1	5	12	CRH1-N177YT	0	FALSE	0	0.99	FALSE	1
637	650.297	12	CRH1-N177YT		1	FHNYTLDWAMDK	FHNYTLDWAMDK[637]	2	y	1	5	12	CRH1-N177YT	0	FALSE	0	0.99	FALSE	1
662	650.297	12	CRH1-N177YT		1	FHNYTLDWAMDK	FHNYTLDWAMDK[662]	2	y	1	5	12	CRH1-N177YT	0	FALSE	0	0.99	FALSE	1
687	650.297	12	CRH1-N177YT		1	FHNYTLDWAMDK	FHNYTLDWAMDK[687]	2	y	1	5	12	CRH1-N177YT	0	FALSE	0	0.99	FALSE	1
712	650.297	12	CRH1-N177YT		1	FHNYTLDWAMDK	FHNYTLDWAMDK[712]	2	y	1	5	12	CRH1-N177YT	0	FALSE	0	0.99	FALSE	1
737	650.297	12	CRH1-N177YT		1	FHNYTLDWAMDK	FHNYTLDWAMDK[737]	2	y	1	5	12	CRH1-N177YT	0	FALSE	0	0.99	FALSE	1
762	650.297	12	CRH1-N177YT		1	FHNYTLDWAMDK	FHNYTLDWAMDK[762]	2	y	1	5	12	CRH1-N177YT	0	FALSE	0	0.99	FALSE	1
787	650.297	12	CRH1-N177YT		1	FHNYTLDWAMDK	FHNYTLDWAMDK[787]	2	y	1	5	12	CRH1-N177YT	0	FALSE	0	0.99	FALSE	1
812	650.297	12	CRH1-N177YT		1	FHNYTLDWAMDK	FHNYTLDWAMDK[812]	2	y	1	5	12	CRH1-N177YT	0	FALSE	0	0.99	FALSE	1
837	650.297	12	CRH1-N177YT		1	FHNYTLDWAMDK	FHNYTLDWAMDK[837]	2	y	1	5	12	CRH1-N177YT	0	FALSE	0	0.99	FALSE	1
862	650.297	12	CRH1-N177YT		1	FHNYTLDWAMDK	FHNYTLDWAMDK[862]	2	y	1	5	12	CRH1-N177YT	0	FALSE	0	0.99	FALSE	1
887	650.297	12	CRH1-N177YT		1	FHNYTLDWAMDK	FHNYTLDWAMDK[887]	2	y	1	5	12	CRH1-N177YT	0	FALSE	0	0.99	FALSE	1
912	650.297	12	CRH1-N177YT		1	FHNYTLDWAMDK	FHNYTLDWAMDK[912]	2	y	1	5	12	CRH1-N177YT	0	FALSE	0	0.99	FALSE	1
937	650.297	12	CRH1-N177YT		1	FHNYTLDWAMDK	FHNYTLDWAMDK[937]	2	y	1	5	12	CRH1-N177YT	0	FALSE	0	0.99	FALSE	1
962	650.297	12	CRH1-N177YT		1	FHNYTLDWAMDK	FHNYTLDWAMDK[962]	2	y	1	5	12	CRH1-N177YT	0	FALSE	0	0.99	FALSE	1
987	650.297	12	CRH1-N177YT		1	FHNYTLDWAMDK	FHNYTLDWAMDK[987]	2	y	1	5	12	CRH1-N177YT	0	FALSE	0	0.99	FALSE	1
1012	650.297	12	CRH1-N177YT		1	FHNYTLDWAMDK	FHNYTLDWAMDK[1012]	2	y	1	5	12	CRH1-N177YT	0	FALSE	0	0.99	FALSE	1
1037	650.297	12	CRH1-N177YT		1	FHNYTLDWAMDK	FHNYTLDWAMDK[1037]	2	y	1	5	12	CRH1-N177YT	0	FALSE	0	0.99	FALSE	1
1062	650.297	12	CRH1-N177YT		1	FHNYTLDWAMDK	FHNYTLDWAMDK[1062]	2	y	1	5	12	CRH1-N177YT	0	FALSE	0	0.99	FALSE	1
1087	650.297	12	CRH1-N177YT		1	FHNYTLDWAMDK	FHNYTLDWAMDK[1087]	2	y	1	5	12	CRH1-N177YT	0	FALSE	0	0.99	FALSE	1
1112	650.297	12	CRH1-N177YT		1	FHNYTLDWAMDK	FHNYTLDWAMDK[1112]	2	y	1	5	12	CRH1-N177YT	0	FALSE	0	0.99	FALSE	1
1137	650.297	12	CRH1-N177YT		1	FHNYTLDWAMDK	FHNYTLDWAMDK[1137]	2	y	1	5	12	CRH1-N177YT	0	FALSE	0	0.99	FALSE	1
1162	650.297	12	CRH1-N177YT		1	FHNYTLDWAMDK	FHNYTLDWAMDK[1162]	2	y	1	5	12	CRH1-N177YT	0	FALSE	0	0.99	FALSE	1
1187	650.297	12	CRH1-N177YT		1	FHNYTLDWAMDK	FHNYTLDWAMDK[1187]	2	y	1	5	12	CRH1-N177YT	0	FALSE	0	0.99	FALSE	1
1212	650.297	12	CRH1-N177YT		1	FHNYTLDWAMDK	FHNYTLDWAMDK[1212]	2	y	1	5	12	CRH1-N177YT	0	FALSE	0	0.99	FALSE	1
1237	650.297	12	CRH1-N177YT		1	FHNYTLDWAMDK	FHNYTLDWAMDK[1237]	2	y	1	5	12	CRH1-N177YT	0	FALSE	0	0.99	FALSE	1
412.5	332.148	12	CRH1-N177YT		1	FHNYTLDWAMDK	FHNYTLDWAMDK[412]	2	b	2	5	12	CRH1-N177YT	0	FALSE	0	0.99	FALSE	1
437	332.148	12	CRH1-N177YT		1	FHNYTLDWAMDK	FHNYTLDWAMDK[437]	2	b	2	5	12	CRH1-N177YT	0	FALSE	0	0.99	FALSE	1
462	332.148	12	CRH1-N177YT		1	FHNYTLDWAMDK	FHNYTLDWAMDK[462]	2	b	2	5	12	CRH1-N177YT	0	FALSE	0	0.99	FALSE	1
487	332.148	12	CRH1-N177YT		1	FHNYTLDWAMDK	FHNYTLDWAMDK[487]	2	b	2	5	12	CRH1-N177YT	0	FALSE	0	0.99	FALSE	1
512	332.148	12	CRH1-N177YT		1	FHNYTLDWAMDK	FHNYTLDWAMDK[512]	2	b	2	5	12	CRH1-N177YT	0	FALSE	0	0.99	FALSE	1
537	332.148	12	CRH1-N177YT		1	FHNYTLDWAMDK	FHNYTLDWAMDK[537]	2	b	2	5	12	CRH1-N177YT	0	FALSE	0	0.99	FALSE	1
562	332.148	12	CRH1-N177YT		1	FHNYTLDWAMDK	FHNYTLDWAMDK[562]	2	b	2	5	12	CRH1-N177YT	0	FALSE	0	0.99	FALSE	1
587	332.148	12	CRH1-N177YT		1	FHNYTLDWAMDK	FHNYTLDWAMDK[587]	2	b	2	5	12	CRH1-N177YT	0	FALSE	0	0.99	FALSE	1
612	332.148	12	CRH1-N177YT		1	FHNYTLDWAMDK	FHNYTLDWAMDK[612]	2	b	2	5	12	CRH1-N177YT	0	FALSE	0	0.99	FALSE	1
637	332.148	12	CRH1-N177YT		1	FHNYTLDWAMDK	FHNYTLDWAMDK[637]	2	b	2	5	12	CRH1-N177YT	0	FALSE	0	0.99	FALSE	1
662	332.148	12	CRH1-N177YT		1	FHNYTLDWAMDK	FHNYTLDWAMDK[662]	2	b	2	5	12	CRH1-N177YT	0	FALSE	0	0.99	FALSE	1
687	332.148	12	CRH1-N177YT		1	FHNYTLDWAMDK	FHNYTLDWAMDK[687]	2	b	2	5	12	CRH1-N177YT	0	FALSE	0	0.99	FALSE	1
712	332.148	12	CRH1-N177YT		1	FHNYTLDWAMDK	FHNYTLDWAMDK[712]	2	b	2	5	12	CRH1-N177YT	0	FALSE	0	0.99	FALSE	1
737	332.148	12	CRH1-N177YT		1	FHNYTLDWAMDK	FHNYTLDWAMDK[737]	2	b	2	5	12	CRH1-N177YT	0	FALSE	0	0.99	FALSE	1
762	332.148	12	CRH1-N177YT		1	FHNYTLDWAMDK	FHNYTLDWAMDK[762]	2	b	2	5	12	CRH1-N177YT	0	FALSE	0	0.99	FALSE	1
787	332.148	12	CRH1-N177YT		1	FHNYTLDWAMDK	FHNYTLDWAMDK[787]	2	b	2	5	12	CRH1-N177YT	0	FALSE	0	0.99	FALSE	1
812	332.148	12	CRH1-N177YT		1	FHNYTLDWAMDK	FHNYTLDWAMDK[812]	2	b	2	5	12	CRH1-N177YT	0	FALSE	0	0.99	FALSE	1
837	332.148	12	CRH1-N177YT		1	FHNYTLDWAMDK	FHNYTLDWAMDK[837]	2	b	2	5	12	CRH1-N177YT	0	FALSE	0	0.99	FALSE	1
862	332.148	12	CRH1-N177YT		1	FHNYTLDWAMDK	FHNYTLDWAMDK[862]	2	b	2	5	12	CRH1-N177YT	0	FALSE	0	0.99	FALSE	1
887	332.148	12	CRH1-N177YT		1	FHNYTLDWAMDK	FHNYTLDWAMDK[887]	2	b	2	5	12	CRH1-N177YT	0	FALSE	0	0.99	FALSE	1
912	332.148	12	CRH1-N177YT		1	FHNYTLDWAMDK	FHNYTLDWAMDK[912]	2	b	2	5	12	CRH1-N177YT	0	FALSE	0	0.99	FALSE	1
937	332.148	12	CRH1-N177YT		1	FHNYTLDWAMDK	FHNYTLDWAMDK[937]	2	b	2	5	12	CRH1-N177YT	0	FALSE	0	0.99	FALSE	1
962	332.148	12	CRH1-N177YT		1	FHNYTLDWAMDK	FHNYTLDWAMDK[962]	2	b	2	5	12	CRH1-N177YT	0	FALSE	0	0.99	FALSE	1
987	332.148	12	CRH1-N177YT		1	FHNYTLDWAMDK	FHNYTLDWAMDK[987]	2	b	2	5	12	CRH1-N177YT	0	FALSE	0	0.99	FALSE	1
1012	332.148	12	CRH1-N177YT		1	FHNYTLDWAMDK	FHNYTLDWAMDK[1012]	2	b	2	5	12	CRH1-N177YT	0	FALSE	0	0.99	FALSE	1
1037	332.148	12	CRH1-N177YT		1	FHNYTLDWAMDK	FHNYTLDWAMDK[1037]	2	b	2	5	12	CRH1-N177YT	0	FALSE	0	0.99	FALSE	1
1062	332.148	12	CRH1-N177YT		1	FHNYTLDWAMDK	FHNYTLDWAMDK[1062]	2	b	2	5	12	CRH1-N177YT	0	FALSE	0	0.99	FALSE	1
1087	332.148	12	CRH1-N177YT		1	FHNYTLDWAMDK	FHNYTLDWAMDK[1087]	2	b	2	5	12	CRH1-N177YT	0	FALSE	0	0.99	FALSE	1
1112	332.148	12	CRH1-N177YT		1	FHNYTLDWAMDK	FHNYTLDWAMDK[1112]	2	b	2	5	12	CRH1-N177YT	0	FALSE	0	0.99	FALSE	1
1137	332.148	12	CRH1-N177YT		1	FHNYTLDWAMDK	FHNYTLDWAMDK[1137]	2	b	2	5	12	CRH1-N177YT	0	FALSE	0	0.99	FALSE	1
1162	332.148	12	CRH1-N177YT		1	FHNYTLDWAMDK	FHNYTLDWAMDK[1162]	2	b	2	5	12	CRH1-N177YT	0	FALSE	0	0.99	FALSE	1
1187	332.148	12	CRH1-N177YT		1	FHNYTLDWAMDK	FHNYTLDWAMDK[1187]	2	b	2	5	12	CRH1-N177YT	0	FALSE	0	0.99	FALSE	1
1212	332.148	12	CRH1-N177YT		1	FHNYTLDWAMDK	FHNYTLDWAMDK[1212]	2	b	2	5	12	CRH1-N177YT	0	FALSE	0	0.99	FALSE	1
1237	332.148	12	CRH1-N177YT		1	FHNYTLDWAMDK	FHNYTLDWAMDK[1237]	2	b	2	5	12	CRH1-N177YT	0	FALSE	0	0.99	FALSE	1
412.5	325.652	12	CRH1-N177YT		1	FHNYTLDWAMDK	FHNYTLDWAMDK[412]	2	y	2	5	12	CRH1-N177YT	0	FALSE	0	0.99	FALSE	1
437	325.652	12	CRH1-N177YT		1	FHNYTLDWAMDK	FHNYTLDWAMDK[437]	2	y	2	5	12	CRH1-N177YT	0	FALSE	0	0.99	FALSE	1
462	325.652	12	CRH1-N177YT		1	FHNYTLDWAMDK	FHNYTLDWAMDK[462]	2	y	2	5	12	CRH1-N177YT	0	FALSE	0	0.99	FALSE	1
487	325.652	12	CRH1-N177YT		1	FHNYTLDWAMDK	FHNYTLDWAMDK[487]	2	y	2	5	12	CRH1-N177YT	0	FALSE	0	0.99	FALSE	1
512	325.652	12	CRH1-N177YT		1	FHNYTLDWAMDK	FHNYTLDWAMDK[512]	2	y	2	5	12	CRH1-N177YT	0	FALSE	0	0.99	FALSE	1
537	325.652	12	CRH1-N177YT		1	FHNYTLDWAMDK	FHNYTLDWAMDK[537]	2	y	2	5	12	CRH1-N177YT	0	FALSE	0	0.99	FALSE	1
562	325.652	12	CRH1-N177YT		1	FHNYTLDWAMDK	FHNYTLDWAMDK[562]	2	y	2	5	12	CRH1-N177YT	0	FALSE	0	0.99	FALSE	1
587	325.652	12	CRH1-N177YT		1	FHNYTLDWAMDK	FHNYTLDWAMDK[587]	2	y	2	5	12	CRH1-N177YT	0	FALSE	0	0.99	FALSE	1
612	325.652	12	CRH1-N177YT		1	FHNYTLDWAMDK	FHNYTLDWAMDK[612]	2	y	2	5	12	CRH1-N177YT	0	FALSE	0	0.99	FALSE	1
637	325.652	12	CRH1-N177YT		1	FHNYTLDWAMDK	FHNYTLDWAMDK[637]	2	y	2	5	12	CRH1-N177YT	0	FALSE	0	0.99	FALSE	1
662	325.652	12	CRH1-N177YT		1	FHNYTLDWAMDK	FHNYTLDWAMDK[662]	2	y	2	5	12	CRH1-N177YT	0	FALSE	0	0.99	FALSE	1
687	325.652	12	CRH1-N177YT		1	FHNYTLDWAMDK	FHNYTLDWAMDK[687]	2	y	2	5	12	CRH1-N177YT	0	FALSE	0	0.99	FALSE	1
712	325.652	12	CRH1-N177YT		1	FHNYTLDWAMDK	FHNYTLDWAMDK[712]	2	y	2	5	12	CRH1-N177YT	0	FALSE	0	0.99	FALSE	1
737	325.652	12	CRH1-N177YT		1	FHNYTLDWAMDK	FHNYTLDWAMDK[737]	2	y	2	5	12	CRH1-N177YT	0	FALSE	0	0.99	FALSE	1
762	325.652	12	CRH1-N177YT		1	FHNYTLDWAMDK	FHNYTLDWAMDK[762]	2	y	2	5	12	CRH1-N177YT	0	FALSE	0	0.99	FALSE	1
787	325.652	12	CRH1-N177YT		1	FHNYTLDWAMDK	FHNYTLDWAMDK[787]	2	y	2	5	12	CRH1-N177YT	0	FALSE	0	0.99	FALSE	1
812	325.652	12	CRH1-N177YT		1	FHNYTLDWAMDK	FHNYTLDWAMDK[812]	2	y	2	5	12	CRH1-N177YT	0	FALSE	0	0.99	FALSE	1
837	325.652	12	CRH1-N177YT		1	FHNYTLDWAMDK	FHNYTLDWAMDK[837]	2	y	2	5	12	CRH1-N177YT	0	FALSE	0	0.99	FALSE	1
862	325.652	12	CRH1-N177YT		1	FHNYTLDWAMDK	FHNYTLDWAMDK[862]	2	y	2	5	12	CRH1-N177YT	0	FALSE	0	0.99	FALSE	1
887	325.652	12	CRH1-N177YT		1	FHNYTLDWAMDK	FHNYTLDWAMDK[887]	2	y	2	5	12	CRH1-N177YT	0	FALSE	0	0.99	FALSE	1
912	325.652	12	CRH1-N177YT		1	FHNYTLDWAMDK	FHNYTLDWAMDK[912]	2	y	2	5	12	CRH1-N177YT	0	FALSE	0	0.99	FALSE	1
937	325.652	12	CRH1-N177YT		1	FHNYTLDWAMDK	FHNYTLDWAMDK[937]	2	y	2	5	12	CRH1-N177YT	0	FALSE	0	0.99	FALSE	1
962	325.652	12	CRH1-N177YT		1	FHNYTLDWAMDK	FHNYTLDWAMDK[962]	2	y	2	5	12	CRH1-N177YT	0	FALSE	0	0.99	FALSE	1
987	325.652	12	CRH1-N177YT		1	FHNYTLDWAMDK	FHNYTLDWAMDK[987]	2	y	2	5	12	CRH1-N177YT	0	FALSE	0	0.99	FALSE	1
1012	325.652	12	CRH1-N177YT		1	FHNYTLDWAMDK	FHNYTLDWAMDK[1012]	2	y	2	5	12	CRH1-N177YT	0	FALSE	0	0.99	FALSE	1
1037	325.652	12	CRH1-N177YT		1	FHNYTLDWAMDK	FHNYTLDWAMDK[1037]	2	y	2	5	12	CRH1-N177YT	0	FALSE	0	0.99	FALSE	1
1062	325.652	12	CRH1-N177YT		1	FHNYTLDWAMDK	FHNYTLDWAMDK[1062]	2	y	2	5	12	CRH1-N177YT	0	FALSE	0	0.99	FALSE	1
1087	325.652	12	CRH1-N177YT		1	FHNYTLDWAMDK	FHNYTLDWAMDK[1087]	2	y	2	5	12	CRH1-N177YT	0	FALSE	0	0.99	FALSE	1
1112	325.652	12	CRH1-N177YT		1	FHNYTLDWAMDK	FHNYTLDWAMDK[1112]	2	y	2	5	12	CRH1-N177YT	0	FALSE	0	0.99	FALSE	1
1137	325.652	12	CRH1-N177YT		1	FHNYTLDWAMDK	FHNYTLDWAMDK[1137]	2	y	2	5	12	CRH1-N177YT	0	FALSE	0	0.99	FALSE	1
1162	325.652	12	CRH1-N177YT		1	FHNYTLDWAMDK	FHNYTLDWAMDK[1162]	2	y	2	5	12	CRH1-N177YT	0	FALSE	0	0.99	FALSE	1
1187	325.652	12	CRH1-N177YT		1	FHNYTLDWAMDK	FHNYTLDWAMDK[1187]	2	y	2	5	12	CRH1-N177YT	0	FALSE	0	0.99	FALSE	1
1212	325.652	12	CRH1-N177YT		1	FHNYTLDWAMDK	FHNYTLDWAMDK[1212]	2	y	2	5	12	CRH1-N177YT	0	FALSE	0	0.99	FALSE	1
1237	325.652	12	CRH1-N177YT		1	FHNYTLDWAMDK	FHNYTLDWAMDK[1237]	2	y	2	5	12	CRH1-N177YT	0	FALSE	0	0.99	FALSE	1
412.5	776.373	12	CRH1-N177YT		1	FHNYTLDWAMDK	FHNYTLDWAMDK[412]	2	b	1	6	12	CRH1-N177YT	0	FALSE	0	0.99	FALSE	1
437	776.373	12	CRH1-N177YT		1	FHNYTLDWAMDK	FHNYTLDWAMDK[437]	2	b	1	6	12	CRH1-N177YT	0	FALSE	0	0.99	FALSE	1
462	776.373	12	CRH1-N177YT		1	FHNYTLDWAMDK	FHNYTLDWAMDK[462]	2	b	1	6	12	CRH1-N177YT	0	FALSE	0	0.99	FALSE	1
487	776.373	12	CRH1-N177YT		1	FHNYTLDWAMDK	FHNYTLDWAMDK[487]	2	b	1	6	12	CRH1-N177YT	0	FALSE	0	0.99	FALSE	1
512	776.373	12	CRH1-N177YT		1	FHNYTLDWAMDK	FHNYTLDWAMDK[512]	2	b	1	6	12	CRH1-N177YT	0	FALSE	0	0.99	FALSE	1
537	776.373	12	CRH1-N177YT		1	FHNYTLDWAMDK	FHNYTLDWAMDK[537]	2	b	1	6	12	CRH1-N177YT	0	FALSE	0	0.99	FALSE	1
562	776.373	12	CRH1-N177YT		1	FHNYTLDWAMDK	FHNYTLDWAMDK[562]	2	b	1	6	12	CRH1-N177YT	0	FALSE	0	0.99	FALSE	1
587	776.373	12	CRH1-N177YT		1	FHNYTLDWAMDK	FHNYTLDWAMDK[587]	2	b	1	6	12	CRH1-N177YT	0	FALSE	0	0.99	FALSE	1
612	776.373	12	CRH1-N177YT		1	FHNYTLDWAMDK	FHNYTLDWAMDK[612]	2	b	1	6	12	CRH1-N177YT	0	FALSE	0	0.99	FALSE	1
637	776.373	12	CRH1-N177YT		1	FHNYTLDWAMDK	FHNYTLDWAMDK[637]	2	b	1	6	12	CRH1-N177YT	0	FALSE	0	0.99	FALSE	1
662	776.373	12	CRH1-N177YT		1	FHNYTLDWAMDK	FHNYTLDWAMDK[662]	2	b	1	6	12	CRH1-N177YT	0	FALSE	0	0.99	FALSE	1
687	776.373	12	CRH1-N177YT		1	FHNYTLDWAMDK	FHNYTLDWAMDK[687]	2	b	1	6	12	CRH1-N177YT	0	FALSE	0	0.99	FALSE	1
712	776.373	12	CRH1-N177YT		1	FHNYTLDWAMDK	FHNYTLDWAMDK[712]	2	b	1	6	12	CRH1-N177YT	0	FALSE	0	0.99	FALSE	1
737	776.373	12	CRH1-N177YT		1	FHNYTLDWAMDK	FHNYTLDWAMDK[737]	2	b	1	6	12	CRH1-N177YT	0	FALSE	0	0.99	FALSE	1
762	776.373	12	CRH1-N177YT		1	FHNYTLDWAMDK	FHNYTLDWAMDK[762]	2	b	1	6	12	CRH1-N177YT	0	FALSE	0	0.99	FALSE	1
787	776.373	12	CRH1-N177YT		1	FHNYTLDWAMDK	FHNYTLDWAMDK[787]	2	b	1	6	12	CRH1-N177YT	0	FALSE	0	0.99	FALSE	1
812	776.373	12	CRH1-N177YT		1	FHNYTLDWAMDK	FHNYTLDWAMDK[812]	2	b	1	6	12	CRH1-N177YT	0	FALSE	0	0.99	FALSE	1
837	776.373	12	CRH1-N177YT		1	FHNYTLDWAMDK	FHNYTLDWAMDK[837]	2	b	1	6	12	CRH1-N177YT	0	FALSE	0	0.99	FALSE	1
862	776.373	12	CRH1-N177YT		1	FHNYTLDWAMDK	FHNYTLDWAMDK[862]	2	b	1	6	12	CRH1-N177YT	0	FALSE	0	0.99	FALSE	1
887	776.373	12	CRH1-N177YT		1	FHNYTLDWAMDK	FHNYTLDWAMDK[887]	2	b	1	6	12	CRH1-N177YT	0	FALSE	0	0.99	FALSE	1
912	776.373	12	CRH1-N177YT		1	FHNYTLDWAMDK	FHNYTLDWAMDK[912]	2	b	1	6	12	CRH1-N177YT	0	FALSE	0	0.99	FALSE	1
937	776.373	12	CRH1-N177YT		1	FHNYTLDWAMDK	FHNYTLDWAMDK[937]	2	b	1	6	12	CRH1-N177YT	0	FALSE	0	0.99	FALSE	1
962	776.373	12	CRH1-N177YT		1	FHNYTLDWAMDK	FHNYTLDWAMDK[962]	2	b	1	6	12	CRH1-N177YT	0	FALSE	0	0.99	FALSE	1
987	776.373	12	CRH1-N177YT		1	FHNYTLDWAMDK	FHNYTLDWAMDK[987]	2	b	1	6	12	CRH1-N177YT	0	FALSE	0	0.99	FALSE	1
1012	776.373	12	CRH1-N177YT		1	FHNYTLDWAMDK	FHNYTLDWAMDK[1012]	2	b	1	6	12	CRH1-N177YT	0	FALSE	0	0.99	FALSE	1
1037	776.373	12	CRH1-N177YT		1	FHNYTLDWAMDK	FHNYTLDWAMDK[1037]	2	b	1	6	12	CRH1-N177YT	0	FALSE	0	0.99	FALSE	1
1062	776.373	12	CRH1-N177YT		1	FHNYTLDWAMDK	FHNYTLDWAMDK[1062]	2	b	1	6	12	CRH1-N177YT	0	FALSE	0	0.99	FALSE	1
1087	776.373	12	CRH1-N177YT		1	FHNYTLDWAMDK	FHNYTLDWAMDK[1087]	2	b	1	6	12	CRH1-N177YT	0	FALSE	0	0.99	FALSE	1
1112	776.373	12	CRH1-N177YT		1	FHNYTLDWAMDK	FHNYTLDWAMDK[1112]	2	b	1	6	12	CRH1-N177YT	0	FALSE	0	0.99	FALSE	1
1137	776.373	12	CRH1-N177YT		1	FHNYTLDWAMDK	FHNYTLDWAMDK[1137]	2	b	1	6	12	CRH1-N177YT	0	FALSE	0	0.99	FALSE	1
1162	776.373	12	CRH1-N177YT		1	FHNYTLDWAMDK	FHNYTLDWAMDK[1162]	2	b	1	6	12	CRH1-N177YT	0	FALSE	0	0.99	FALSE	1
1187	776.373	12	CRH1-N177YT		1	FHNYTLDWAMDK	FHNYTLDWAMDK[1187]	2	b	1	6	12	CRH1-N177YT	0	FALSE	0	0.99	FALSE	1
1212	776.373	12	CRH1-N177YT		1	FHNYTLDWAMDK	FHNYTLDWAMDK[1212]	2	b	1	6	12	CRH1-N177YT	0	FALSE	0	0.99	FALSE	1
1237	776.373	12	CRH1-N177YT		1	FHNYTLDWAMDK	FHNYTLDWAMDK[1237]	2	b	1	6	12	CRH1-N177YT	0	FALSE	0	0.99	FALSE	1
412.5	765.324	12	CRH1-N177YT		1	FHNYTLDWAMDK	FHNYTLDWAMDK[412]	2	y	1	6	12	CRH1-N177YT	0	FALSE	0	0.99	FALSE	1
437	765.324	12	CRH1-N177YT		1	FHNYTLDWAMDK	FHNYTLDWAMDK[437]	2	y	1	6	12	CRH1-N177YT	0	FALSE	0	0.99	FALSE	1
462	765.324	12	CRH1-N177YT		1	FHNYTLDWAMDK	FHNYTLDWAMDK[462]	2	y	1	6	12	CRH1-N177YT	0	FALSE	0	0.99	FALSE	1
487	765.324	12	CRH1-N177YT		1	FHNYTLDWAMDK	FHNYTLDWAMDK[487]	2	y	1	6	12	CRH1-N177YT	0	FALSE	0	0.99	FALSE	1
512	765.324	12	CRH1-N177YT		1	FHNYTLDWAMDK	FHNYTLDWAMDK[512]	2	y	1	6	12	CRH1-N177YT	0	FALSE	0	0.99	FALSE	1
537	765.324	12	CRH1-N177YT		1	FHNYTLDWAMDK	FHNYTLDWAMDK[537]	2	y	1	6	12	CRH1-N177YT	0	FALSE	0	0.99	FALSE	1
562	765.324	12	CRH1-N177YT		1	FHNYTLDWAMDK	FHNYTLDWAMDK[562]	2	y	1	6	12	CRH1-N177YT	0	FALSE	0	0.99	FALSE	1
587	765.324	12	CRH1-N177YT		1	FHNYTLDWAMDK	FHNYTLDWAMDK[587]	2	y	1	6	12	CRH1-N177YT	0	FALSE	0	0.99	FALSE	1
612	765.324	12	CRH1-N177YT		1	FHNYTLDWAMDK	FHNYTLDWAMDK[612]	2	y	1	6	12	CRH1-N177YT	0	FALSE	0	0.99	FALSE	1
637	765.324	12	CRH1-N177YT		1	FHNYTLDWAMDK	FHNYTLDWAMDK[637]	2	y	1	6	12	CRH1-N177YT	0	FALSE	0	0.99	FALSE	1
662	765.324	12	CRH1-N177YT		1	FHNYTLDWAMDK	FHNYTLDWAMDK[662]	2	y	1	6	12	CRH1-N177YT	0	FALSE	0	0.99	FALSE	1
687	765.324	12	CRH1-N177YT		1	FHNYTLDWAMDK	FHNYTLDWAMDK[687]	2	y	1	6	12	CRH1-N177YT	0	FALSE	0	0.99	FALSE	1
712	765.324	12	CRH1-N177YT		1	FHNYTLDWAMDK	FHNYTLDWAMDK[712]	2	y	1	6	12	CRH1-N177YT	0	FALSE	0	0.99	FALSE	1
737	765.324	12	CRH1-N177YT		1	FHNYTLDWAMDK	FHNYTLDWAMDK[737]	2	y	1	6	12	CRH1-N177YT	0	FALSE	0	0.99	FALSE	1
762	765.324	12	CRH1-N177YT		1	FHNYTLDWAMDK	FHNYTLDWAMDK[762]	2	y	1	6	12	CRH1-N177YT	0	FALSE	0	0.99	FALSE	1
787	765.324	12	CRH1-N177YT		1	FHNYTLDWAMDK	FHNYTLDWAMDK[787]	2	y	1	6	12	CRH1-N177YT	0	FALSE	0	0.99	FALSE	1
812	765.324	12	CRH1-N177YT		1	FHNYTLDWAMDK	FHNYTLDWAMDK[812]	2	y	1	6	12	CRH1-N177YT	0	FALSE	0	0.99	FALSE	1
837	765.324	12	CRH1-N177YT		1	FHNYTLDWAMDK	FHNYTLDWAMDK[837]	2	y	1	6	12	CRH1-N177YT	0	FALSE	0	0.99	FALSE	1
862	765.324	12	CRH1-N177YT		1	FHNYTLDWAMDK	FHNYTLDWAMDK[862]	2	y	1	6	12	CRH1-N177YT	0	FALSE	0	0.99	FALSE	1
887	765.324	12	CRH1-N177YT		1	FHNYTLDWAMDK	FHNYTLDWAMDK[887]	2	y	1	6	12	CRH1-N177YT	0	FALSE	0	0.99	FALSE	1
912	765.324	12	CRH1-N177YT		1	FHNYTLDWAMDK	FHNYTLDWAMDK[912]	2	y	1	6	12	CRH1-N177YT	0	FALSE	0	0.99	FALSE	1
937	765.324	12	CRH1-N177YT		1	FHNYTLDWAMDK	FHNYTLDWAMDK[937]	2	y	1	6	12	CRH1-N177YT	0	FALSE	0	0.99	FALSE	1
962	765.324	12	CRH1-N177YT		1	FHNYTLDWAMDK	FHNYTLDWAMDK[962]	2	y	1	6	12	CRH1-N177YT	0	FALSE	0	0.99	FALSE	1
987	765.324	12	CRH1-N177YT		1	FHNYTLDWAMDK	FHNYTLDWAMDK[987]	2	y	1	6	12	CRH1-N177YT	0	FALSE	0	0.99	FALSE	1
1012	765.324	12	CRH1-N177YT		1	FHNYTLDWAMDK	FHNYTLDWAMDK[1012]	2	y	1	6	12	CRH1-N177YT	0	FALSE	0	0.99	FALSE	1
1037	765.324	12	CRH1-N177YT		1	FHNYTLDWAMDK	FHNYTLDWAMDK[1037]	2	y	1	6	12	CRH1-N177YT	0	FALSE	0	0.99	FALSE	1
1062	765.324	12	CRH1-N177YT		1	FHNYTLDWAMDK	FHNYTLDWAMDK[1062]	2	y	1	6	12	CRH1-N177YT	0	FALSE	0	0.99	FALSE	1
1087	765.324	12	CRH1-N177YT		1	FHNYTLDWAMDK	FHNYTLDWAMDK[1087]	2	y	1	6	12	CRH1-N177YT	0	FALSE	0	0.99	FALSE	1
1112	765.324	12	CRH1-N177YT		1	FHNYTLDWAMDK	FHNYTLDWAMDK[1112]	2	y	1	6	12	CRH1-N177YT	0	FALSE	0	0.99	FALSE	1
1137	765.324	12	CRH1-N177YT		1	FHNYTLDWAMDK	FHNYTLDWAMDK[1137]	2	y	1	6	12	CRH1-N177YT	0	FALSE	0	0.99	FALSE	1
1162	765.324	12	CRH1-N177YT		1	FHNYTLDWAMDK	FHNYTLDWAMDK[1162]	2	y	1	6	12	CRH1-N177YT	0	FALSE	0	0.99	FALSE	1
1187	765.324	12	CRH1-N177YT		1	FHNYTLDWAMDK	FHNYTLDWAMDK[1187]	2	y	1	6	12	CRH1-N177YT	0	FALSE	0	0.99	FALSE	1
1212	765.324	12	CRH1-N177YT		1	FHNYTLDWAMDK	FHNYTLDWAMDK[1212]	2	y	1	6	12	CRH1-N177YT	0	FALSE	0	0.99	FALSE	1
1237	765.324	12	CRH1-N177YT		1	FHNYTLDWAMDK	FHNYTLDWAMDK[1237]	2	y	1	6	12	CRH1-N177YT	0	FALSE	0	0.99	FALSE	1
412.5	388.69	12	CRH1-N177YT		1	FHNYTLDWAMDK	FHNYTLDWAMDK[412]	2	b	2	6	12	CRH1-N177YT	0	FALSE	0	0.99	FALSE	1
437	388.69	12	CRH1-N177YT		1	FHNYTLDWAMDK	FHNYTLDWAMDK[437]	2	b	2	6	12	CRH1-N177YT	0	FALSE	0	0.99	FALSE	1
462	388.69	12	CRH1-N177YT		1	FHNYTLDWAMDK	FHNYTLDWAMDK[462]	2	b	2	6	12	CRH1-N177YT	0	FALSE	0	0.99	FALSE	1
487	388.69	12	CRH1-N177YT		1	FHNYTLDWAMDK	FHNYTLDWAMDK[487]	2	b	2	6	12	CRH1-N177YT	0	FALSE	0	0.99	FALSE	1
512	388.69	12	CRH1-N177YT		1	FHNYTLDWAMDK	FHNYTLDWAMDK[512]	2	b	2	6	12	CRH1-N177YT	0	FALSE	0	0.99	FALSE	1
537	388.69	12	CRH1-N177YT		1	FHNYTLDWAMDK	FHNYTLDWAMDK[537]	2	b	2	6	12	CRH1-N177YT	0	FALSE	0	0.99	FALSE	1
562	388.69	12	CRH1-N177YT		1	FHNYTLDWAMDK	FHNYTLDWAMDK[562]	2	b	2	6	12	CRH1-N177YT	0	FALSE	0	0.99	FALSE	1
587	388.69	12	CRH1-N177YT		1	FHNYTLDWAMDK	FHNYTLDWAMDK[587]	2	b	2	6	12	CRH1-N177YT	0	FALSE	0	0.99	FALSE	1
612	388.69	12	CRH1-N177YT		1	FHNYTLDWAMDK	FHNYTLDWAMDK[612]	2	b	2	6	12	CRH1-N177YT	0	FALSE	0	0.99	FALSE	1
637	388.69	12	CRH1-N177YT		1	FHNYTLDWAMDK	FHNYTLDWAMDK[637]	2	b	2	6	12	CRH1-N177YT	0	FALSE	0	0.99	FALSE	1
662	388.69	12	CRH1-N177YT		1	FHNYTLDWAMDK	FHNYTLDWAMDK[662]	2	b	2	6	12	CRH1-N177YT	0	FALSE	0	0.99	FALSE	1
687	388.69	12	CRH1-N177YT		1	FHNYTLDWAMDK	FHNYTLDWAMDK[687]	2	b	2	6	12	CRH1-N177YT	0	FALSE	0	0.99	FALSE	1
712	388.69	12	CRH1-N177YT		1	FHNYTLDWAMDK	FHNYTLDWAMDK[712]	2	b	2	6	12	CRH1-N177YT	0	FALSE	0	0.99	FALSE	1
737	388.69	12	CRH1-N177YT		1	FHNYTLDWAMDK	FHNYTLDWAMDK[737]	2	b	2	6	12	CRH1-N177YT	0	FALSE	0	0.99	FALSE	1
762	388.69	12	CRH1-N177YT		1	FHNYTLDWAMDK	FHNYTLDWAMDK[762]	2	b	2	6	12	CRH1-N177YT	0	FALSE	0	0.99	FALSE	1
787	388.69	12	CRH1-N177YT		1	FHNYTLDWAMDK	FHNYTLDWAMDK[787]	2	b	2	6	12	CRH1-N177YT	0	FALSE	0	0.99	FALSE	1
812	388.69	12	CRH1-N177YT		1	FHNYTLDWAMDK	FHNYTLDWAMDK[812]	2	b	2	6	12	CRH1-N177YT	0	FALSE	0	0.99	FALSE	1
837	388.69	12	CRH1-N177YT		1	FHNYTLDWAMDK	FHNYTLDWAMDK[837]	2	b	2	6	12	CRH1-N177YT	0	FALSE	0	0.99	FALSE	1
862	388.69	12	CRH1-N177YT		1	FHNYTLDWAMDK	FHNYTLDWAMDK[862]	2	b	2	6	12	CRH1-N177YT	0	FALSE	0	0.99	FALSE	1
887	388.69	12	CRH1-N177YT		1	FHNYTLDWAMDK	FHNYTLDWAMDK[887]	2	b	2	6	12	CRH1-N177YT	0	FALSE	0	0.99	FALSE	1
912	388.69	12	CRH1-N177YT		1	FHNYTLDWAMDK	FHNYTLDWAMDK[912]	2	b	2	6	12	CRH1-N177YT	0	FALSE	0	0.99	FALSE	1
937	388.69	12	CRH1-N177YT		1	FHNYTLDWAMDK	FHNYTLDWAMDK[937]	2	b	2	6	12	CRH1-N177YT	0	FALSE	0	0.99	FALSE	1
962	388.69	12	CRH1-N177YT		1	FHNYTLDWAMDK	FHNYTLDWAMDK[962]	2	b	2	6	12	CRH1-N177YT	0	FALSE	0	0.99	FALSE	1
987	388.69	12	CRH1-N177YT		1	FHNYTLDWAMDK	FHNYTLDWAMDK[987]	2	b	2	6	12	CRH1-N177YT	0	FALSE	0	0.99	FALSE	1
1012	388.69	12	CRH1-N177YT		1	FHNYTLDWAMDK	FHNYTLDWAMDK[1012]	2	b	2	6	12	CRH1-N177YT	0	FALSE	0	0.99	FALSE	1
1037	388.69	12	CRH1-N177YT		1	FHNYTLDWAMDK	FHNYTLDWAMDK[1037]	2	b	2	6	12	CRH1-N177YT	0	FALSE	0	0.99	FALSE	1
1062	388.69	12	CRH1-N177YT		1	FHNYTLDWAMDK	FHNYTLDWAMDK[1062]	2	b	2	6	12	CRH1-N177YT	0	FALSE	0	0.99	FALSE	1
1087	388.69	12	CRH1-N177YT		1	FHNYTLDWAMDK	FHNYTLDWAMDK[1087]	2	b	2	6	12	CRH1-N177YT	0	FALSE	0	0.99	FALSE	1
1112	388.69	12	CRH1-N177YT		1	FHNYTLDWAMDK	FHNYTLDWAMDK[1112]	2	b	2	6	12	CRH1-N177YT	0	FALSE	0	0.99	FALSE	1
1137	388.69	12	CRH1-N177YT		1	FHNYTLDWAMDK	FHNYTLDWAMDK[1137]	2	b	2	6	12	CRH1-N177YT	0	FALSE	0	0.99	FALSE	1
1162	388.69	12	CRH1-N177YT		1	FHNYTLDWAMDK	FHNYTLDWAMDK[1162]	2	b	2	6	12	CRH1-N177YT	0	FALSE	0	0.99	FALSE	1
1187	388.69	12	CRH1-N177YT		1	FHNYTLDWAMDK	FHNYTLDWAMDK[1187]	2	b	2	6	12	CRH1-N177YT	0	FALSE	0	0.99	FALSE	1
1212	388.69	12	CRH1-N177YT		1	FHNYTLDWAMDK	FHNYTLDWAMDK[1212]	2	b	2	6	12	CRH1-N177YT	0	FALSE	0	0.99	FALSE	1
1237	388.69	12	CRH1-N177YT		1	FHNYTLDWAMDK	FHNYTLDWAMDK[1237]	2	b	2	6	12	CRH1-N177YT	0	FALSE	0	0.99	FALSE	1
412.5	383.165	12	CRH1-N177YT		1	FHNYTLDWAMDK	FHNYTLDWAMDK[412]	2	y	2	6	12	CRH1-N177YT	0	FALSE	0	0.99	FALSE	1
437	383.165	12	CRH1-N177YT		1	FHNYTLDWAMDK	FHNYTLDWAMDK[437]	2	y	2	6	12	CRH1-N177YT	0	FALSE	0	0.99	FALSE	1
462	383.165	12	CRH1-N177YT		1	FHNYTLDWAMDK	FHNYTLDWAMDK[462]	2	y	2	6	12	CRH1-N177YT	0	FALSE	0	0.99	FALSE	1
487	383.165	12	CRH1-N177YT		1	FHNYTLDWAMDK	FHNYTLDWAMDK[487]	2	y	2	6	12	CRH1-N177YT	0	FALSE	0	0.99	FALSE	1
512	383.165	12	CRH1-N177YT		1	FHNYTLDWAMDK	FHNYTLDWAMDK[512]	2	y	2	6	12	CRH1-N177YT	0	FALSE	0	0.99	FALSE	1
537	383.165	12	CRH1-N177YT		1	FHNYTLDWAMDK	FHNYTLDWAMDK[537]	2	y	2	6	12	CRH1-N177YT	0	FALSE	0	0.99	FALSE	1
562	383.165	12	CRH1-N177YT		1	FHNYTLDWAMDK	FHNYTLDWAMDK[562]	2	y	2	6	12	CRH1-N177YT	0	FALSE	0	0.99	FALSE	1
587	383.165	12	CRH1-N177YT		1	FHNYTLDWAMDK	FHNYTLDWAMDK[587]	2	y	2	6	12	CRH1-N177YT	0	FALSE	0	0.99	FALSE	1
612	383.165	12	CRH1-N177YT		1	FHNYTLDWAMDK	FHNYTLDWAMDK[612]	2	y	2	6	12	CRH1-N177YT	0	FALSE	0	0.99	FALSE	1
637	383.165	12	CRH1-N177YT		1	FHNYTLDWAMDK	FHNYTLDWAMDK[637]	2	y	2	6	12	CRH1-N177YT	0	FALSE	0	0.99	FALSE	1
662	383.165	12	CRH1-N177YT		1	FHNYTLDWAMDK	FHNYTLDWAMDK[662]	2	y	2	6	12	CRH1-N177YT	0	FALSE	0	0.99	FALSE	1
687	383.165	12	CRH1-N177YT		1	FHNYTLDWAMDK	FHNYTLDWAMDK[687]	2	y	2	6	12	CRH1-N177YT	0	FALSE	0	0.99	FALSE	1
712	383.165	12	CRH1-N177YT		1	FHNYTLDWAMDK	FHNYTLDWAMDK[712]	2	y	2	6	12	CRH1-N177YT	0	FALSE	0	0.99	FALSE	1
737	383.165	12	CRH1-N177YT		1	FHNYTLDWAMDK	FHNYTLDWAMDK[737]	2	y	2	6	12	CRH1-N177YT	0	FALSE	0	0.99	FALSE	1
762	383.165	12	CRH1-N177YT		1	FHNYTLDWAMDK	FHNYTLDWAMDK[762]	2	y	2	6	12	CRH1-N177YT	0	FALSE	0	0.99	FALSE	1
787	383.165	12	CRH1-N177YT		1	FHNYTLDWAMDK	FHNYTLDWAMDK[787]	2	y	2	6	12	CRH1-N177YT	0	FALSE	0	0.99	FALSE	1
812	383.165	12	CRH1-N177YT		1	FHNYTLDWAMDK	FHNYTLDWAMDK[812]	2	y	2	6	12	CRH1-N177YT	0	FALSE	0	0.99	FALSE	1
837	383.165	12	CRH1-N177YT		1	FHNYTLDWAMDK	FHNYTLDWAMDK[837]	2	y	2	6	12	CRH1-N177YT	0	FALSE	0	0.99	FALSE	1
862	383.165	12	CRH1-N177YT		1	FHNYTLDWAMDK	FHNYTLDWAMDK[862]	2	y	2	6	12	CRH1-N177YT	0	FALSE	0	0.99	FALSE	1
887	383.165	12	CRH1-N177YT		1	FHNYTLDWAMDK	FHNYTLDWAMDK[887]	2	y	2	6	12	CRH1-N177YT	0	FALSE	0	0.99	FALSE	1
912	383.165	12	CRH1-N177YT		1	FHNYTLDWAMDK	FHNYTLDWAMDK[912]	2	y	2	6	12	CRH1-N177YT	0	FALSE	0	0.99	FALSE	1
937	383.165	12	CRH1-N177YT		1	FHNYTLDWAMDK	FHNYTLDWAMDK[937]	2	y	2	6	12	CRH1-N177YT	0	FALSE	0	0.99	FALSE	1
962	383.165	12	CRH1-N177YT		1	FHNYTLDWAMDK	FHNYTLDWAMDK[962]	2	y	2	6	12	CRH1-N177YT	0	FALSE	0	0.99	FALSE	1
987	383.165	12	CRH1-N177YT		1	FHNYTLDWAMDK	FHNYTLDWAMDK[987]	2	y	2	6	12	CRH1-N177YT	0	FALSE	0	0.99	FALSE	1
1012	383.165	12	CRH1-N177YT		1	FHNYTLDWAMDK	FHNYTLDWAMDK[1012]	2	y	2	6	12	CRH1-N177YT	0	FALSE	0	0.99	FALSE	1
1037	383.165	12	CRH1-N177YT		1	FHNYTLDWAMDK	FHNYTLDWAMDK[1037]	2	y	2	6	12	CRH1-N177YT	0	FALSE	0	0.99	FALSE	1
1062	383.165	12	CRH1-N177YT		1	FHNYTLDWAMDK	FHNYTLDWAMDK[1062]	2	y	2	6	12	CRH1-N177YT	0	FALSE	0	0.99	FALSE	1
1087	383.165	12	CRH1-N177YT		1	FHNYTLDWAMDK	FHNYTLDWAMDK[1087]	2	y	2	6	12	CRH1-N177YT	0	FALSE	0	0.99	FALSE	1
1112	383.165	12	CRH1-N177YT		1	FHNYTLDWAMDK	FHNYTLDWAMDK[1112]	2	y	2	6	12	CRH1-N177YT	0	FALSE	0	0.99	FALSE	1
1137	383.165	12	CRH1-N177YT		1	FHNYTLDWAMDK	FHNYTLDWAMDK[1137]	2	y	2	6	12	CRH1-N177YT	0	FALSE	0	0.99	FALSE	1
1162	383.165	12	CRH1-N177YT		1	FHNYTLDWAMDK	FHNYTLDWAMDK[1162]	2	y	2	6	12	CRH1-N177YT	0	FALSE	0	0.99	FALSE	1
1187	383.165	12	CRH1-N177YT		1	FHNYTLDWAMDK	FHNYTLDWAMDK[1187]	2	y	2	6	12	CRH1-N177YT	0	FALSE	0	0.99	FALSE	1
1212	383.165	12	CRH1-N177YT		1	FHNYTLDWAMDK	FHNYTLDWAMDK[1212]	2	y	2	6	12	CRH1-N177YT	0	FALSE	0	0.99	FALSE	1
1237	383.165	12	CRH1-N177YT		1	FHNYTLDWAMDK	FHNYTLDWAMDK[1237]	2	y	2	6	12	CRH1-N177YT	0	FALSE	0	0.99	FALSE	1
412.5	891.399	12	CRH1-N177YT		1	FHNYTLDWAMDK	FHNYTLDWAMDK[412]	2	b	1	7	12	CRH1-N177YT	0	FALSE	0	0.99	FALSE	1
437	891.399	12	CRH1-N177YT		1	FHNYTLDWAMDK	FHNYTLDWAMDK[437]	2	b	1	7	12	CRH1-N177YT	0	FALSE	0	0.99	FALSE	1
462	891.399	12	CRH1-N177YT		1	FHNYTLDWAMDK	FHNYTLDWAMDK[462]	2	b	1	7	12	CRH1-N177YT	0	FALSE	0	0.99	FALSE	1
487	891.399	12	CRH1-N177YT		1	FHNYTLDWAMDK	FHNYTLDWAMDK[487]	2	b	1	7	12	CRH1-N177YT	0	FALSE	0	0.99	FALSE	1
512	891.399	12	CRH1-N177YT		1	FHNYTLDWAMDK	FHNYTLDWAMDK[512]	2	b	1	7	12	CRH1-N177YT	0	FALSE	0	0.99	FALSE	1
537	891.399	12	CRH1-N177YT		1	FHNYTLDWAMDK	FHNYTLDWAMDK[537]	2	b	1	7	12	CRH1-N177YT	0	FALSE	0	0.99	FALSE	1
562	891.399	12	CRH1-N177YT		1	FHNYTLDWAMDK	FHNYTLDWAMDK[562]	2	b	1	7	12	CRH1-N177YT	0	FALSE	0	0.99	FALSE	1
587	891.399	12	CRH1-N177YT		1	FHNYTLDWAMDK	FHNYTLDWAMDK[587]	2	b	1	7	12	CRH1-N177YT	0	FALSE	0	0.99	FALSE	1
612	891.399	12	CRH1-N177YT		1	FHNYTLDWAMDK	FHNYTLDWAMDK[612]	2	b	1	7	12	CRH1-N177YT	0	FALSE	0	0.99	FALSE	1
637	891.399	12	CRH1-N177YT		1	FHNYTLDWAMDK	FHNYTLDWAMDK[637]	2	b	1	7	12	CRH1-N177YT	0	FALSE	0	0.99	FALSE	1
662	891.399	12	CRH1-N177YT		1	FHNYTLDWAMDK	FHNYTLDWAMDK[662]	2	b	1	7	12	CRH1-N177YT	0	FALSE	0	0.99	FALSE	1
687	891.399	12	CRH1-N177YT		1	FHNYTLDWAMDK	FHNYTLDWAMDK[687]	2	b	1	7	12	CRH1-N177YT	0	FALSE	0	0.99	FALSE	1
712	891.399	12	CRH1-N177YT		1	FHNYTLDWAMDK	FHNYTLDWAMDK[712]	2	b	1	7	12	CRH1-N177YT	0	FALSE	0	0.99	FALSE	1
737	891.399	12	CRH1-N177YT		1	FHNYTLDWAMDK	FHNYTLDWAMDK[737]	2	b	1	7	12	CRH1-N177YT	0	FALSE	0	0.99	FALSE	1
762	891.399	12	CRH1-N177YT		1	FHNYTLDWAMDK	FHNYTLDWAMDK[762]	2	b	1	7	12	CRH1-N177YT	0	FALSE	0	0.99	FALSE	1
787	891.399	12	CRH1-N177YT		1	FHNYTLDWAMDK	FHNYTLDWAMDK[787]	2	b	1	7	12	CRH1-N177YT	0	FALSE	0	0.99	FALSE	1
812	891.399	12	CRH1-N177YT		1	FHNYTLDWAMDK	FHNYTLDWAMDK[812]	2	b	1	7	12	CRH1-N177YT	0	FALSE	0	0.99	FALSE	1
837	891.399	12	CRH1-N177YT		1	FHNYTLDWAMDK	FHNYTLDWAMDK[837]	2	b	1	7	12	CRH1-N177YT	0	FALSE	0	0.99	FALSE	1
862	891.399	12	CRH1-N177YT		1	FHNYTLDWAMDK	FHNYTLDWAMDK[862]	2	b	1	7	12	CRH1-N177YT	0	FALSE	0	0.99	FALSE	1
887	891.399	12	CRH1-N177YT		1	FHNYTLDWAMDK	FHNYTLDWAMDK[887]	2	b	1	7	12	CRH1-N177YT	0	FALSE	0	0.99	FALSE	1
912	891.399	12	CRH1-N177YT		1	FHNYTLDWAMDK	FHNYTLDWAMDK[912]	2	b	1	7	12	CRH1-N177YT	0	FALSE	0	0.99	FALSE	1
937	891.399	12	CRH1-N177YT		1	FHNYTLDWAMDK	FHNYTLDWAMDK[937]	2	b	1	7	12	CRH1-N177YT	0	FALSE	0	0.99	FALSE	1
962	891.399	12	CRH1-N177YT		1	FHNYTLDWAMDK	FHNYTLDWAMDK[962]	2	b	1	7	12	CRH1-N177YT	0	FALSE	0	0.99	FALSE	1
987	891.399	12	CRH1-N177YT		1	FHNYTLDWAMDK	FHNYTLDWAMDK[987]	2	b	1	7	12	CRH1-N177YT	0	FALSE	0	0.99	FALSE	1
1012	891.399	12	CRH1-N177YT		1	FHNYTLDWAMDK	FHNYTLDWAMDK[1012]	2	b	1	7	12	CRH1-N177YT	0	FALSE	0	0.99	FALSE	1
1037	891.399	12	CRH1-N177YT		1	FHNYTLDWAMDK	FHNYTLDWAMDK[1037]	2	b	1	7	12	CRH1-N177YT	0	FALSE	0	0.99	FALSE	1
1062	891.399	12	CRH1-N177YT		1	FHNYTLDWAMDK	FHNYTLDWAMDK[1062]	2	b	1	7	12	CRH1-N177YT	0	FALSE	0	0.99	FALSE	1
1087	891.399	12	CRH1-N177YT		1	FHNYTLDWAMDK	FHNYTLDWAMDK[1087]	2	b	1	7	12	CRH1-N177YT	0	FALSE	0	0.99	FALSE	1
1112	891.399	12	CRH1-N177YT		1	FHNYTLDWAMDK	FHNYTLDWAMDK[1112]	2	b	1	7	12	CRH1-N177YT	0	FALSE	0	0.99	FALSE	1
1137	891.399	12	CRH1-N177YT		1	FHNYTLDWAMDK	FHNYTLDWAMDK[1137]	2	b	1	7	12	CRH1-N177YT	0	FALSE	0	0.99	FALSE	1
1162	891.399	12	CRH1-N177YT		1	FHNYTLDWAMDK	FHNYTLDWAMDK[1162]	2	b	1	7	12	CRH1-N177YT	0	FALSE	0	0.99	FALSE	1
1187	891.399	12	CRH1-N177YT		1	FHNYTLDWAMDK	FHNYTLDWAMDK[1187]	2	b	1	7	12	CRH1-N177YT	0	FALSE	0	0.99	FALSE	1
1212	891.399	12	CRH1-N177YT		1	FHNYTLDWAMDK	FHNYTLDWAMDK[1212]	2	b	1	7	12	CRH1-N177YT	0	FALSE	0	0.99	FALSE	1
1237	891.399	12	CRH1-N177YT		1	FHNYTLDWAMDK	FHNYTLDWAMDK[1237]	2	b	1	7	12	CRH1-N177YT	0	FALSE	0	0.99	FALSE	1
412.5	878.408	12	CRH1-N177YT		1	FHNYTLDWAMDK	FHNYTLDWAMDK[412]	2	y	1	7	12	CRH1-N177YT	0	FALSE	0	0.99	FALSE	1
437	878.408	12	CRH1-N177YT		1	FHNYTLDWAMDK	FHNYTLDWAMDK[437]	2	y	1	7	12	CRH1-N177YT	0	FALSE	0	0.99	FALSE	1
462	878.408	12	CRH1-N177YT		1	FHNYTLDWAMDK	FHNYTLDWAMDK[462]	2	y	1	7	12	CRH1-N177YT	0	FALSE	0	0.99	FALSE	1
487	878.408	12	CRH1-N177YT		1	FHNYTLDWAMDK	FHNYTLDWAMDK[487]	2	y	1	7	12	CRH1-N177YT	0	FALSE	0	0.99	FALSE	1
512	878.408	12	CRH1-N177YT		1	FHNYTLDWAMDK	FHNYTLDWAMDK[512]	2	y	1	7	12	CRH1-N177YT	0	FALSE	0	0.99	FALSE	1
537	878.408	12	CRH1-N177YT		1	FHNYTLDWAMDK	FHNYTLDWAMDK[537]	2	y	1	7	12	CRH1-N177YT	0	FALSE	0	0.99	FALSE	1
562	878.408	12	CRH1-N177YT		1	FHNYTLDWAMDK	FHNYTLDWAMDK[562]	2	y	1	7	12	CRH1-N177YT	0	FALSE	0	0.99	FALSE	1
587	878.408	12	CRH1-N177YT		1	FHNYTLDWAMDK	FHNYTLDWAMDK[587]	2	y	1	7	12	CRH1-N177YT	0	FALSE	0	0.99	FALSE	1
612	878.408	12	CRH1-N177YT		1	FHNYTLDWAMDK	FHNYTLDWAMDK[612]	2	y	1	7	12	CRH1-N177YT	0	FALSE	0	0.99	FALSE	1
637	878.408	12	CRH1-N177YT		1	FHNYTLDWAMDK	FHNYTLDWAMDK[637]	2	y	1	7	12	CRH1-N177YT	0	FALSE	0	0.99	FALSE	1
662	878.408	12	CRH1-N177YT		1	FHNYTLDWAMDK	FHNYTLDWAMDK[662]	2	y	1	7	12	CRH1-N177YT	0	FALSE	0	0.99	FALSE	1
687	878.408	12	CRH1-N177YT		1	FHNYTLDWAMDK	FHNYTLDWAMDK[687]	2	y	1	7	12	CRH1-N177YT	0	FALSE	0	0.99	FALSE	1
712	878.408	12	CRH1-N177YT		1	FHNYTLDWAMDK	FHNYTLDWAMDK[712]	2	y	1	7	12	CRH1-N177YT	0	FALSE	0	0.99	FALSE	1
737	878.408	12	CRH1-N177YT		1	FHNYTLDWAMDK	FHNYTLDWAMDK[737]	2	y	1	7	12	CRH1-N177YT	0	FALSE	0	0.99	FALSE	1
762	878.408	12	CRH1-N177YT		1	FHNYTLDWAMDK	FHNYTLDWAMDK[762]	2	y	1	7	12	CRH1-N177YT	0	FALSE	0	0.99	FALSE	1
787	878.408	12	CRH1-N177YT		1	FHNYTLDWAMDK	FHNYTLDWAMDK[787]	2	y	1	7	12	CRH1-N177YT	0	FALSE	0	0.99	FALSE	1
812	878.408	12	CRH1-N177YT		1	FHNYTLDWAMDK	FHNYTLDWAMDK[812]	2	y	1	7	12	CRH1-N177YT	0	FALSE	0	0.99	FALSE	1
837	878.408	12	CRH1-N177YT		1	FHNYTLDWAMDK	FHNYTLDWAMDK[837]	2	y	1	7	12	CRH1-N177YT	0	FALSE	0	0.99	FALSE	1
862	878.408	12	CRH1-N177YT		1	FHNYTLDWAMDK	FHNYTLDWAMDK[862]	2	y	1	7	12	CRH1-N177YT	0	FALSE	0	0.99	FALSE	1
887	878.408	12	CRH1-N177YT		1	FHNYTLDWAMDK	FHNYTLDWAMDK[887]	2	y	1	7	12	CRH1-N177YT	0	FALSE	0	0.99	FALSE	1
912	878.408	12	CRH1-N177YT		1	FHNYTLDWAMDK	FHNYTLDWAMDK[912]	2	y	1	7	12	CRH1-N177YT	0	FALSE	0	0.99	FALSE	1
937	878.408	12	CRH1-N177YT		1	FHNYTLDWAMDK	FHNYTLDWAMDK[937]	2	y	1	7	12	CRH1-N177YT	0	FALSE	0	0.99	FALSE	1
962	878.408	12	CRH1-N177YT		1	FHNYTLDWAMDK	FHNYTLDWAMDK[962]	2	y	1	7	12	CRH1-N177YT	0	FALSE	0	0.99	FALSE	1
987	878.408	12	CRH1-N177YT		1	FHNYTLDWAMDK	FHNYTLDWAMDK[987]	2	y	1	7	12	CRH1-N177YT	0	FALSE	0	0.99	FALSE	1
1012	878.408	12	CRH1-N177YT		1	FHNYTLDWAMDK	FHNYTLDWAMDK[1012]	2	y	1	7	12	CRH1-N177YT	0	FALSE	0	0.99	FALSE	1
1037	878.408	12	CRH1-N177YT		1	FHNYTLDWAMDK	FHNYTLDWAMDK[1037]	2	y	1	7	12	CRH1-N177YT	0	FALSE	0	0.99	FALSE	1
1062	878.408	12	CRH1-N177YT		1	FHNYTLDWAMDK	FHNYTLDWAMDK[1062]	2	y	1	7	12	CRH1-N177YT	0	FALSE	0	0.99	FALSE	1
1087	878.408	12	CRH1-N177YT		1	FHNYTLDWAMDK	FHNYTLDWAMDK[1087]	2	y	1	7	12	CRH1-N177YT	0	FALSE	0	0.99	FALSE	1
1112	878.408	12	CRH1-N177YT		1	FHNYTLDWAMDK	FHNYTLDWAMDK[1112]	2	y	1	7	12	CRH1-N177YT	0	FALSE	0	0.99	FALSE	1
1137	878.408	12	CRH1-N177YT		1	FHNYTLDWAMDK	FHNYTLDWAMDK[1137]	2	y	1	7	12	CRH1-N177YT	0	FALSE	0	0.99	FALSE	1
1162	878.408	12	CRH1-N177YT		1	FHNYTLDWAMDK	FHNYTLDWAMDK[1162]	2	y	1	7	12	CRH1-N177YT	0	FALSE	0	0.99	FALSE	1
1187	878.408	12	CRH1-N177YT		1	FHNYTLDWAMDK	FHNYTLDWAMDK[1187]	2	y	1	7	12	CRH1-N177YT	0	FALSE	0	0.99	FALSE	1
1212	878.408	12	CRH1-N177YT		1	FHNYTLDWAMDK	FHNYTLDWAMDK[1212]	2	y	1	7	12	CRH1-N177YT	0	FALSE	0	0.99	FALSE	1
1237	878.408	12	CRH1-N177YT		1	FHNYTLDWAMDK	FHNYTLDWAMDK[1237]	2	y	1	7	12	CRH1-N177YT	0	FALSE	0	0.99	FALSE	1
412.5	446.203	12	CRH1-N177YT		1	FHNYTLDWAMDK	FHNYTLDWAMDK[412]	2	b	2	7	12	CRH1-N177YT	0	FALSE	0	0.99	FALSE	1
437	446.203	12	CRH1-N177YT		1	FHNYTLDWAMDK	FHNYTLDWAMDK[437]	2	b	2	7	12	CRH1-N177YT	0	FALSE	0	0.99	FALSE	1
462	446.203	12	CRH1-N177YT		1	FHNYTLDWAMDK	FHNYTLDWAMDK[462]	2	b	2	7	12	CRH1-N177YT	0	FALSE	0	0.99	FALSE	1
487	446.203	12	CRH1-N177YT		1	FHNYTLDWAMDK	FHNYTLDWAMDK[487]	2	b	2	7	12	CRH1-N177YT	0	FALSE	0	0.99	FALSE	1
512	446.203	12	CRH1-N177YT		1	FHNYTLDWAMDK	FHNYTLDWAMDK[512]	2	b	2	7	12	CRH1-N177YT	0	FALSE	0	0.99	FALSE	1
537	446.203	12	CRH1-N177YT		1	FHNYTLDWAMDK	FHNYTLDWAMDK[537]	2	b	2	7	12	CRH1-N177YT	0	FALSE	0	0.99	FALSE	1
562	446.203	12	CRH1-N177YT		1	FHNYTLDWAMDK	FHNYTLDWAMDK[562]	2	b	2	7	12	CRH1-N177YT	0	FALSE	0	0.99	FALSE	1
587	446.203	12	CRH1-N177YT		1	FHNYTLDWAMDK	FHNYTLDWAMDK[587]	2	b	2	7	12	CRH1-N177YT	0	FALSE	0	0.99	FALSE	1
612	446.203	12	CRH1-N177YT		1	FHNYTLDWAMDK	FHNYTLDWAMDK[612]	2	b	2	7	12	CRH1-N177YT	0	FALSE	0	0.99	FALSE	1
637	446.203	12	CRH1-N177YT		1	FHNYTLDWAMDK	FHNYTLDWAMDK[637]	2	b	2	7	12	CRH1-N177YT	0	FALSE	0	0.99	FALSE	1
662	446.203	12	CRH1-N177YT		1	FHNYTLDWAMDK	FHNYTLDWAMDK[662]	2	b	2	7	12	CRH1-N177YT	0	FALSE	0	0.99	FALSE	1
687	446.203	12	CRH1-N177YT		1	FHNYTLDWAMDK	FHNYTLDWAMDK[687]	2	b	2	7	12	CRH1-N177YT	0	FALSE	0	0.99	FALSE	1
712	446.203	12	CRH1-N177YT		1	FHNYTLDWAMDK	FHNYTLDWAMDK[712]	2	b	2	7	12	CRH1-N177YT	0	FALSE	0	0.99	FALSE	1
737	446.203	12	CRH1-N177YT		1	FHNYTLDWAMDK	FHNYTLDWAMDK[737]	2	b	2	7	12	CRH1-N177YT	0	FALSE	0	0.99	FALSE	1
762	446.203	12	CRH1-N177YT		1	FHNYTLDWAMDK	FHNYTLDWAMDK[762]	2	b	2	7	12	CRH1-N177YT	0	FALSE	0	0.99	FALSE	1
787	446.203	12	CRH1-N177YT		1	FHNYTLDWAMDK	FHNYTLDWAMDK[787]	2	b	2	7	12	CRH1-N177YT	0	FALSE	0	0.99	FALSE	1
812	446.203	12	CRH1-N177YT		1	FHNYTLDWAMDK	FHNYTLDWAMDK[812]	2	b	2	7	12	CRH1-N177YT	0	FALSE	0	0.99	FALSE	1
837	446.203	12	CRH1-N177YT		1	FHNYTLDWAMDK	FHNYTLDWAMDK[837]	2	b	2	7	12	CRH1-N177YT	0	FALSE	0	0.99	FALSE	1
862	446.203	12	CRH1-N177YT		1	FHNYTLDWAMDK	FHNYTLDWAMDK[862]	2	b	2	7	12	CRH1-N177YT	0	FALSE	0	0.99	FALSE	1
887	446.203	12	CRH1-N177YT		1	FHNYTLDWAMDK	FHNYTLDWAMDK[887]	2	b	2	7	12	CRH1-N177YT	0	FALSE	0	0.99	FALSE	1
912	446.203	12	CRH1-N177YT		1	FHNYTLDWAMDK	FHNYTLDWAMDK[912]	2	b	2	7	12	CRH1-N177YT	0	FALSE	0	0.99	FALSE	1
937	446.203	12	CRH1-N177YT		1	FHNYTLDWAMDK	FHNYTLDWAMDK[937]	2	b	2	7	12	CRH1-N177YT	0	FALSE	0	0.99	FALSE	1
962	446.203	12	CRH1-N177YT		1	FHNYTLDWAMDK	FHNYTLDWAMDK[962]	2	b	2	7	12	CRH1-N177YT	0	FALSE	0	0.99	FALSE	1
987	446.203	12	CRH1-N177YT		1	FHNYTLDWAMDK	FHNYTLDWAMDK[987]	2	b	2	7	12	CRH1-N177YT	0	FALSE	0	0.99	FALSE	1
1012	446.203	12	CRH1-N177YT		1	FHNYTLDWAMDK	FHNYTLDWAMDK[1012]	2	b	2	7	12	CRH1-N177YT	0	FALSE	0	0.99	FALSE	1
1037	446.203	12	CRH1-N177YT		1	FHNYTLDWAMDK	FHNYTLDWAMDK[1037]	2	b	2	7	12	CRH1-N177YT	0	FALSE	0	0.99	FALSE	1
1062	446.203	12	CRH1-N177YT		1	FHNYTLDWAMDK	FHNYTLDWAMDK[1062]	2	b	2	7	12	CRH1-N177YT	0	FALSE	0	0.99	FALSE	1
1087	446.203	12	CRH1-N177YT		1	FHNYTLDWAMDK	FHNYTLDWAMDK[1087]	2	b	2	7	12	CRH1-N177YT	0	FALSE	0	0.99	FALSE	1
1112	446.203	12	CRH1-N177YT		1	FHNYTLDWAMDK	FHNYTLDWAMDK[1112]	2	b	2	7	12	CRH1-N177YT	0	FALSE	0	0.99	FALSE	1
1137	446.203	12	CRH1-N177YT		1	FHNYTLDWAMDK	FHNYTLDWAMDK[1137]	2	b	2	7	12	CRH1-N177YT	0	FALSE	0	0.99	FALSE	1
1162	446.203	12	CRH1-N177YT		1	FHNYTLDWAMDK	FHNYTLDWAMDK[1162]	2	b	2	7	12	CRH1-N177YT	0	FALSE	0	0.99	FALSE	1
1187	446.203	12	CRH1-N177YT		1	FHNYTLDWAMDK	FHNYTLDWAMDK[1187]	2	b	2	7	12	CRH1-N177YT	0	FALSE	0	0.99	FALSE	1
1212	446.203	12	CRH1-N177YT		1	FHNYTLDWAMDK	FHNYTLDWAMDK[1212]	2	b	2	7	12	CRH1-N177YT	0	FALSE	0	0.99	FALSE	1
1237	446.203	12	CRH1-N177YT		1	FHNYTLDWAMDK	FHNYTLDWAMDK[1237]	2	b	2	7	12	CRH1-N177YT	0	FALSE	0	0.99	FALSE	1
412.5	439.707	12	CRH1-N177YT		1	FHNYTLDWAMDK	FHNYTLDWAMDK[412]	2	y	2	7	12	CRH1-N177YT	0	FALSE	0	0.99	FALSE	1
437	439.707	12	CRH1-N177YT		1	FHNYTLDWAMDK	FHNYTLDWAMDK[437]	2	y	2	7	12	CRH1-N177YT	0	FALSE	0	0.99	FALSE	1
462	439.707	12	CRH1-N177YT		1	FHNYTLDWAMDK	FHNYTLDWAMDK[462]	2	y	2	7	12	CRH1-N177YT	0	FALSE	0	0.99	FALSE	1
487	439.707	12	CRH1-N177YT		1	FHNYTLDWAMDK	FHNYTLDWAMDK[487]	2	y	2	7	12	CRH1-N177YT	0	FALSE	0	0.99	FALSE	1
512	439.707	12	CRH1-N177YT		1	FHNYTLDWAMDK	FHNYTLDWAMDK[512]	2	y	2	7	12	CRH1-N177YT	0	FALSE	0	0.99	FALSE	1
537	439.707	12	CRH1-N177YT		1	FHNYTLDWAMDK	FHNYTLDWAMDK[537]	2	y	2	7	12	CRH1-N177YT	0	FALSE	0	0.99	FALSE	1
562	439.707	12	CRH1-N177YT		1	FHNYTLDWAMDK	FHNYTLDWAMDK[562]	2	y	2	7	12	CRH1-N177YT	0	FALSE	0	0.99	FALSE	1
587	439.707	12	CRH1-N177YT		1	FHNYTLDWAMDK	FHNYTLDWAMDK[587]	2	y	2	7	12	CRH1-N177YT	0	FALSE	0	0.99	FALSE	1
612	439.707	12	CRH1-N177YT		1	FHNYTLDWAMDK	FHNYTLDWAMDK[612]	2	y	2	7	12	CRH1-N177YT	0	FALSE	0	0.99	FALSE	1
637	439.707	12	CRH1-N177YT		1	FHNYTLDWAMDK	FHNYTLDWAMDK[637]	2	y	2	7	12	CRH1-N177YT	0	FALSE	0	0.99	FALSE	1
662	439.707	12	CRH1-N177YT		1	FHNYTLDWAMDK	FHNYTLDWAMDK[662]	2	y	2	7	12	CRH1-N177YT	0	FALSE	0	0.99	FALSE	1
687	439.707	12	CRH1-N177YT		1	FHNYTLDWAMDK	FHNYTLDWAMDK[687]	2	y	2	7	12	CRH1-N177YT	0	FALSE	0	0.99	FALSE	1
712	439.707	12	CRH1-N177YT		1	FHNYTLDWAMDK	FHNYTLDWAMDK[712]	2	y	2	7	12	CRH1-N177YT	0	FALSE	0	0.99	FALSE	1
737	439.707	12	CRH1-N177YT		1	FHNYTLDWAMDK	FHNYTLDWAMDK[737]	2	y	2	7	12	CRH1-N177YT	0	FALSE	0	0.99	FALSE	1
762	439.707	12	CRH1-N177YT		1	FHNYTLDWAMDK	FHNYTLDWAMDK[762]	2	y	2	7	12	CRH1-N177YT	0	FALSE	0	0.99	FALSE	1
787	439.707	12	CRH1-N177YT		1	FHNYTLDWAMDK	FHNYTLDWAMDK[787]	2	y	2	7	12	CRH1-N177YT	0	FALSE	0	0.99	FALSE	1
812	439.707	12	CRH1-N177YT		1	FHNYTLDWAMDK	FHNYTLDWAMDK[812]	2	y	2	7	12	CRH1-N177YT	0	FALSE	0	0.99	FALSE	1
837	439.707	12	CRH1-N177YT		1	FHNYTLDWAMDK	FHNYTLDWAMDK[837]	2	y	2	7	12	CRH1-N177YT	0	FALSE	0	0.99	FALSE	1
862	439.707	12	CRH1-N177YT		1	FHNYTLDWAMDK	FHNYTLDWAMDK[862]	2	y	2	7	12	CRH1-N177YT	0	FALSE	0	0.99	FALSE	1
887	439.707	12	CRH1-N177YT		1	FHNYTLDWAMDK	FHNYTLDWAMDK[887]	2	y	2	7	12	CRH1-N177YT	0	FALSE	0	0.99	FALSE	1
912	439.707	12	CRH1-N177YT		1	FHNYTLDWAMDK	FHNYTLDWAMDK[912]	2	y	2	7	12	CRH1-N177YT	0	FALSE	0	0.99	FALSE	1
937	439.707	12	CRH1-N177YT		1	FHNYTLDWAMDK	FHNYTLDWAMDK[937]	2	y	2	7	12	CRH1-N177YT	0	FALSE	0	0.99	FALSE	1
962	439.707	12	CRH1-N177YT		1	FHNYTLDWAMDK	FHNYTLDWAMDK[962]	2	y	2	7	12	CRH1-N177YT	0	FALSE	0	0.99	FALSE	1
987	439.707	12	CRH1-N177YT		1	FHNYTLDWAMDK	FHNYTLDWAMDK[987]	2	y	2	7	12	CRH1-N177YT	0	FALSE	0	0.99	FALSE	1
1012	439.707	12	CRH1-N177YT		1	FHNYTLDWAMDK	FHNYTLDWAMDK[1012]	2	y	2	7	12	CRH1-N177YT	0	FALSE	0	0.99	FALSE	1
1037	439.707	12	CRH1-N177YT		1	FHNYTLDWAMDK	FHNYTLDWAMDK[1037]	2	y	2	7	12	CRH1-N177YT	0	FALSE	0	0.99	FALSE	1
1062	439.707	12	CRH1-N177YT		1	FHNYTLDWAMDK	FHNYTLDWAMDK[1062]	2	y	2	7	12	CRH1-N177YT	0	FALSE	0	0.99	FALSE	1
1087	439.707	12	CRH1-N177YT		1	FHNYTLDWAMDK	FHNYTLDWAMDK[1087]	2	y	2	7	12	CRH1-N177YT	0	FALSE	0	0.99	FALSE	1
1112	439.707	12	CRH1-N177YT		1	FHNYTLDWAMDK	FHNYTLDWAMDK[1112]	2	y	2	7	12	CRH1-N177YT	0	FALSE	0	0.99	FALSE	1
1137	439.707	12	CRH1-N177YT		1	FHNYTLDWAMDK	FHNYTLDWAMDK[1137]	2	y	2	7	12	CRH1-N177YT	0	FALSE	0	0.99	FALSE	1
1162	439.707	12	CRH1-N177YT		1	FHNYTLDWAMDK	FHNYTLDWAMDK[1162]	2	y	2	7	12	CRH1-N177YT	0	FALSE	0	0.99	FALSE	1
1187	439.707	12	CRH1-N177YT		1	FHNYTLDWAMDK	FHNYTLDWAMDK[1187]	2	y	2	7	12	CRH1-N177YT	0	FALSE	0	0.99	FALSE	1
1212	439.707	12	CRH1-N177YT		1	FHNYTLDWAMDK	FHNYTLDWAMDK[1212]	2	y	2	7	12	CRH1-N177YT	0	FALSE	0	0.99	FALSE	1
1237	439.707	12	CRH1-N177YT		1	FHNYTLDWAMDK	FHNYTLDWAMDK[1237]	2	y	2	7	12	CRH1-N177YT	0	FALSE	0	0.99	FALSE	1
412.5	1077.48	12	CRH1-N177YT		1	FHNYTLDWAMDK	FHNYTLDWAMDK[412]	2	b	1	8	12	CRH1-N177YT	0	FALSE	0	0.99	FALSE	1
437	1077.48	12	CRH1-N177YT		1	FHNYTLDWAMDK	FHNYTLDWAMDK[437]	2	b	1	8	12	CRH1-N177YT	0	FALSE	0	0.99	FALSE	1
462	1077.48	12	CRH1-N177YT		1	FHNYTLDWAMDK	FHNYTLDWAMDK[462]	2	b	1	8	12	CRH1-N177YT	0	FALSE	0	0.99	FALSE	1
487	1077.48	12	CRH1-N177YT		1	FHNYTLDWAMDK	FHNYTLDWAMDK[487]	2	b	1	8	12	CRH1-N177YT	0	FALSE	0	0.99	FALSE	1
512	1077.48	12	CRH1-N177YT		1	FHNYTLDWAMDK	FHNYTLDWAMDK[512]	2	b	1	8	12	CRH1-N177YT	0	FALSE	0	0.99	FALSE	1
537	1077.48	12	CRH1-N177YT		1	FHNYTLDWAMDK	FHNYTLDWAMDK[537]	2	b	1	8	12	CRH1-N177YT	0	FALSE	0	0.99	FALSE	1
562	1077.48	12	CRH1-N177YT		1	FHNYTLDWAMDK	FHNYTLDWAMDK[562]	2	b	1	8	12	CRH1-N177YT	0	FALSE	0	0.99	FALSE	1
587	1077.48	12	CRH1-N177YT		1	FHNYTLDWAMDK	FHNYTLDWAMDK[587]	2	b	1	8	12	CRH1-N177YT	0	FALSE	0	0.99	FALSE	1
612	1077.48	12	CRH1-N177YT		1	FHNYTLDWAMDK	FHNYTLDWAMDK[612]	2	b	1	8	12	CRH1-N177YT	0	FALSE	0	0.99	FALSE	1
637	1077.48	12	CRH1-N177YT		1	FHNYTLDWAMDK	FHNYTLDWAMDK[637]	2	b	1	8	12	CRH1-N177YT	0	FALSE	0	0.99	FALSE	1
662	1077.48	12	CRH1-N177YT		1	FHNYTLDWAMDK	FHNYTLDWAMDK[662]	2	b	1	8	12	CRH1-N177YT	0	FALSE	0	0.99	FALSE	1
687	1077.48	12	CRH1-N177YT		1	FHNYTLDWAMDK	FHNYTLDWAMDK[687]	2	b	1	8	12	CRH1-N177YT	0	FALSE	0	0.99	FALSE	1
712	1077.48	12	CRH1-N177YT		1	FHNYTLDWAMDK	FHNYTLDWAMDK[712]	2	b	1	8	12	CRH1-N177YT	0	FALSE	0	0.99	FALSE	1
737	1077.48	12	CRH1-N177YT		1	FHNYTLDWAMDK	FHNYTLDWAMDK[737]	2	b	1	8	12	CRH1-N177YT	0	FALSE	0	0.99	FALSE	1
762	1077.48	12	CRH1-N177YT		1	FHNYTLDWAMDK	FHNYTLDWAMDK[762]	2	b	1	8	12	CRH1-N177YT	0	FALSE	0	0.99	FALSE	1
787	1077.48	12	CRH1-N177YT		1	FHNYTLDWAMDK	FHNYTLDWAMDK[787]	2	b	1	8	12	CRH1-N177YT	0	FALSE	0	0.99	FALSE	1
812	1077.48	12	CRH1-N177YT		1	FHNYTLDWAMDK	FHNYTLDWAMDK[812]	2	b	1	8	12	CRH1-N177YT	0	FALSE	0	0.99	FALSE	1
837	1077.48	12	CRH1-N177YT		1	FHNYTLDWAMDK	FHNYTLDWAMDK[837]	2	b	1	8	12	CRH1-N177YT	0	FALSE	0	0.99	FALSE	1
862	1077.48	12	CRH1-N177YT		1	FHNYTLDWAMDK	FHNYTLDWAMDK[862]	2	b	1	8	12	CRH1-N177YT	0	FALSE	0	0.99	FALSE	1
887	1077.48	12	CRH1-N177YT		1	FHNYTLDWAMDK	FHNYTLDWAMDK[887]	2	b	1	8	12	CRH1-N177YT	0	FALSE	0	0.99	FALSE	1
912	1077.48	12	CRH1-N177YT		1	FHNYTLDWAMDK	FHNYTLDWAMDK[912]	2	b	1	8	12	CRH1-N177YT	0	FALSE	0	0.99	FALSE	1
937	1077.48	12	CRH1-N177YT		1	FHNYTLDWAMDK	FHNYTLDWAMDK[937]	2	b	1	8	12	CRH1-N177YT	0	FALSE	0	0.99	FALSE	1
962	1077.48	12	CRH1-N177YT		1	FHNYTLDWAMDK	FHNYTLDWAMDK[962]	2	b	1	8	12	CRH1-N177YT	0	FALSE	0	0.99	FALSE	1
987	1077.48	12	CRH1-N177YT		1	FHNYTLDWAMDK	FHNYTLDWAMDK[987]	2	b	1	8	12	CRH1-N177YT	0	FALSE	0	0.99	FALSE	1
1012	1077.48	12	CRH1-N177YT		1	FHNYTLDWAMDK	FHNYTLDWAMDK[1012]	2	b	1	8	12	CRH1-N177YT	0	FALSE	0	0.99	FALSE	1
1037	1077.48	12	CRH1-N177YT		1	FHNYTLDWAMDK	FHNYTLDWAMDK[1037]	2	b	1	8	12	CRH1-N177YT	0	FALSE	0	0.99	FALSE	1
1062	1077.48	12	CRH1-N177YT		1	FHNYTLDWAMDK	FHNYTLDWAMDK[1062]	2	b	1	8	12	CRH1-N177YT	0	FALSE	0	0.99	FALSE	1
1087	1077.48	12	CRH1-N177YT		1	FHNYTLDWAMDK	FHNYTLDWAMDK[1087]	2	b	1	8	12	CRH1-N177YT	0	FALSE	0	0.99	FALSE	1
1112	1077.48	12	CRH1-N177YT		1	FHNYTLDWAMDK	FHNYTLDWAMDK[1112]	2	b	1	8	12	CRH1-N177YT	0	FALSE	0	0.99	FALSE	1
1137	1077.48	12	CRH1-N177YT		1	FHNYTLDWAMDK	FHNYTLDWAMDK[1137]	2	b	1	8	12	CRH1-N177YT	0	FALSE	0	0.99	FALSE	1
1162	1077.48	12	CRH1-N177YT		1	FHNYTLDWAMDK	FHNYTLDWAMDK[1162]	2	b	1	8	12	CRH1-N177YT	0	FALSE	0	0.99	FALSE	1
1187	1077.48	12	CRH1-N177YT		1	FHNYTLDWAMDK	FHNYTLDWAMDK[1187]	2	b	1	8	12	CRH1-N177YT	0	FALSE	0	0.99	FALSE	1
1212	1077.48	12	CRH1-N177YT		1	FHNYTLDWAMDK	FHNYTLDWAMDK[1212]	2	b	1	8	12	CRH1-N177YT	0	FALSE	0	0.99	FALSE	1
1237	1077.48	12	CRH1-N177YT		1	FHNYTLDWAMDK	FHNYTLDWAMDK[1237]	2	b	1	8	12	CRH1-N177YT	0	FALSE	0	0.99	FALSE	1
412.5	979.455	12	CRH1-N177YT		1	FHNYTLDWAMDK	FHNYTLDWAMDK[412]	2	y	1	8	12	CRH1-N177YT	0	FALSE	0	0.99	FALSE	1
437	979.455	12	CRH1-N177YT		1	FHNYTLDWAMDK	FHNYTLDWAMDK[437]	2	y	1	8	12	CRH1-N177YT	0	FALSE	0	0.99	FALSE	1
462	979.455	12	CRH1-N177YT		1	FHNYTLDWAMDK	FHNYTLDWAMDK[462]	2	y	1	8	12	CRH1-N177YT	0	FALSE	0	0.99	FALSE	1
487	979.455	12	CRH1-N177YT		1	FHNYTLDWAMDK	FHNYTLDWAMDK[487]	2	y	1	8	12	CRH1-N177YT	0	FALSE	0	0.99	FALSE	1
512	979.455	12	CRH1-N177YT		1	FHNYTLDWAMDK	FHNYTLDWAMDK[512]	2	y	1	8	12	CRH1-N177YT	0	FALSE	0	0.99	FALSE	1
537	979.455	12	CRH1-N177YT		1	FHNYTLDWAMDK	FHNYTLDWAMDK[537]	2	y	1	8	12	CRH1-N177YT	0	FALSE	0	0.99	FALSE	1
562	979.455	12	CRH1-N177YT		1	FHNYTLDWAMDK	FHNYTLDWAMDK[562]	2	y	1	8	12	CRH1-N177YT	0	FALSE	0	0.99	FALSE	1
587	979.455	12	CRH1-N177YT		1	FHNYTLDWAMDK	FHNYTLDWAMDK[587]	2	y	1	8	12	CRH1-N177YT	0	FALSE	0	0.99	FALSE	1
612	979.455	12	CRH1-N177YT		1	FHNYTLDWAMDK	FHNYTLDWAMDK[612]	2	y	1	8	12	CRH1-N177YT	0	FALSE	0	0.99	FALSE	1
637	979.455	12	CRH1-N177YT		1	FHNYTLDWAMDK	FHNYTLDWAMDK[637]	2	y	1	8	12	CRH1-N177YT	0	FALSE	0	0.99	FALSE	1
662	979.455	12	CRH1-N177YT		1	FHNYTLDWAMDK	FHNYTLDWAMDK[662]	2	y	1	8	12	CRH1-N177YT	0	FALSE	0	0.99	FALSE	1
687	979.455	12	CRH1-N177YT		1	FHNYTLDWAMDK	FHNYTLDWAMDK[687]	2	y	1	8	12	CRH1-N177YT	0	FALSE	0	0.99	FALSE	1
712	979.455	12	CRH1-N177YT		1	FHNYTLDWAMDK	FHNYTLDWAMDK[712]	2	y	1	8	12	CRH1-N177YT	0	FALSE	0	0.99	FALSE	1
737	979.455	12	CRH1-N177YT		1	FHNYTLDWAMDK	FHNYTLDWAMDK[737]	2	y	1	8	12	CRH1-N177YT	0	FALSE	0	0.99	FALSE	1
762	979.455	12	CRH1-N177YT		1	FHNYTLDWAMDK	FHNYTLDWAMDK[762]	2	y	1	8	12	CRH1-N177YT	0	FALSE	0	0.99	FALSE	1
787	979.455	12	CRH1-N177YT		1	FHNYTLDWAMDK	FHNYTLDWAMDK[787]	2	y	1	8	12	CRH1-N177YT	0	FALSE	0	0.99	FALSE	1
812	979.455	12	CRH1-N177YT		1	FHNYTLDWAMDK	FHNYTLDWAMDK[812]	2	y	1	8	12	CRH1-N177YT	0	FALSE	0	0.99	FALSE	1
837	979.455	12	CRH1-N177YT		1	FHNYTLDWAMDK	FHNYTLDWAMDK[837]	2	y	1	8	12	CRH1-N177YT	0	FALSE	0	0.99	FALSE	1
862	979.455	12	CRH1-N177YT		1	FHNYTLDWAMDK	FHNYTLDWAMDK[862]	2	y	1	8	12	CRH1-N177YT	0	FALSE	0	0.99	FALSE	1
887	979.455	12	CRH1-N177YT		1	FHNYTLDWAMDK	FHNYTLDWAMDK[887]	2	y	1	8	12	CRH1-N177YT	0	FALSE	0	0.99	FALSE	1
912	979.455	12	CRH1-N177YT		1	FHNYTLDWAMDK	FHNYTLDWAMDK[912]	2	y	1	8	12	CRH1-N177YT	0	FALSE	0	0.99	FALSE	1
937	979.455	12	CRH1-N177YT		1	FHNYTLDWAMDK	FHNYTLDWAMDK[937]	2	y	1	8	12	CRH1-N177YT	0	FALSE	0	0.99	FALSE	1
962	979.455	12	CRH1-N177YT		1	FHNYTLDWAMDK	FHNYTLDWAMDK[962]	2	y	1	8	12	CRH1-N177YT	0	FALSE	0	0.99	FALSE	1
987	979.455	12	CRH1-N177YT		1	FHNYTLDWAMDK	FHNYTLDWAMDK[987]	2	y	1	8	12	CRH1-N177YT	0	FALSE	0	0.99	FALSE	1
1012	979.455	12	CRH1-N177YT		1	FHNYTLDWAMDK	FHNYTLDWAMDK[1012]	2	y	1	8	12	CRH1-N177YT	0	FALSE	0	0.99	FALSE	1
1037	979.455	12	CRH1-N177YT		1	FHNYTLDWAMDK	FHNYTLDWAMDK[1037]	2	y	1	8	12	CRH1-N177YT	0	FALSE	0	0.99	FALSE	1
1062	979.455	12	CRH1-N177YT		1	FHNYTLDWAMDK	FHNYTLDWAMDK[1062]	2	y	1	8	12	CRH1-N177YT	0	FALSE	0	0.99	FALSE	1
1087	979.455	12	CRH1-N177YT		1	FHNYTLDWAMDK	FHNYTLDWAMDK[1087]	2	y	1	8	12	CRH1-N177YT	0	FALSE	0	0.99	FALSE	1
1112	979.455	12	CRH1-N177YT		1	FHNYTLDWAMDK	FHNYTLDWAMDK[1112]	2	y	1	8	12	CRH1-N177YT	0	FALSE	0	0.99	FALSE	1
1137	979.455	12	CRH1-N177YT		1	FHNYTLDWAMDK	FHNYTLDWAMDK[1137]	2	y	1	8	12	CRH1-N177YT	0	FALSE	0	0.99	FALSE	1
1162	979.455	12	CRH1-N177YT		1	FHNYTLDWAMDK	FHNYTLDWAMDK[1162]	2	y	1	8	12	CRH1-N177YT	0	FALSE	0	0.99	FALSE	1
1187	979.455	12	CRH1-N177YT		1	FHNYTLDWAMDK	FHNYTLDWAMDK[1187]	2	y	1	8	12	CRH1-N177YT	0	FALSE	0	0.99	FALSE	1
1212	979.455	12	CRH1-N177YT		1	FHNYTLDWAMDK	FHNYTLDWAMDK[1212]	2	y	1	8	12	CRH1-N177YT	0	FALSE	0	0.99	FALSE	1
1237	979.455	12	CRH1-N177YT		1	FHNYTLDWAMDK	FHNYTLDWAMDK[1237]	2	y	1	8	12	CRH1-N177YT	0	FALSE	0	0.99	FALSE	1
412.5	539.243	12	CRH1-N177YT		1	FHNYTLDWAMDK	FHNYTLDWAMDK[412]	2	b	2	8	12	CRH1-N177YT	0	FALSE	0	0.99	FALSE	1
437	539.243	12	CRH1-N177YT		1	FHNYTLDWAMDK	FHNYTLDWAMDK[437]	2	b	2	8	12	CRH1-N177YT	0	FALSE	0	0.99	FALSE	1
462	539.243	12	CRH1-N177YT		1	FHNYTLDWAMDK	FHNYTLDWAMDK[462]	2	b	2	8	12	CRH1-N177YT	0	FALSE	0	0.99	FALSE	1
487	539.243	12	CRH1-N177YT		1	FHNYTLDWAMDK	FHNYTLDWAMDK[487]	2	b	2	8	12	CRH1-N177YT	0	FALSE	0	0.99	FALSE	1
512	539.243	12	CRH1-N177YT		1	FHNYTLDWAMDK	FHNYTLDWAMDK[512]	2	b	2	8	12	CRH1-N177YT	0	FALSE	0	0.99	FALSE	1
537	539.243	12	CRH1-N177YT		1	FHNYTLDWAMDK	FHNYTLDWAMDK[537]	2	b	2	8	12	CRH1-N177YT	0	FALSE	0	0.99	FALSE	1
562	539.243	12	CRH1-N177YT		1	FHNYTLDWAMDK	FHNYTLDWAMDK[562]	2	b	2	8	12	CRH1-N177YT	0	FALSE	0	0.99	FALSE	1
587	539.243	12	CRH1-N177YT		1	FHNYTLDWAMDK	FHNYTLDWAMDK[587]	2	b	2	8	12	CRH1-N177YT	0	FALSE	0	0.99	FALSE	1
612	539.243	12	CRH1-N177YT		1	FHNYTLDWAMDK	FHNYTLDWAMDK[612]	2	b	2	8	12	CRH1-N177YT	0	FALSE	0	0.99	FALSE	1
637	539.243	12	CRH1-N177YT		1	FHNYTLDWAMDK	FHNYTLDWAMDK[637]	2	b	2	8	12	CRH1-N177YT	0	FALSE	0	0.99	FALSE	1
662	539.243	12	CRH1-N177YT		1	FHNYTLDWAMDK	FHNYTLDWAMDK[662]	2	b	2	8	12	CRH1-N177YT	0	FALSE	0	0.99	FALSE	1
687	539.243	12	CRH1-N177YT		1	FHNYTLDWAMDK	FHNYTLDWAMDK[687]	2	b	2	8	12	CRH1-N177YT	0	FALSE	0	0.99	FALSE	1
712	539.243	12	CRH1-N177YT		1	FHNYTLDWAMDK	FHNYTLDWAMDK[712]	2	b	2	8	12	CRH1-N177YT	0	FALSE	0	0.99	FALSE	1
737	539.243	12	CRH1-N177YT		1	FHNYTLDWAMDK	FHNYTLDWAMDK[737]	2	b	2	8	12	CRH1-N177YT	0	FALSE	0	0.99	FALSE	1
762	539.243	12	CRH1-N177YT		1	FHNYTLDWAMDK	FHNYTLDWAMDK[762]	2	b	2	8	12	CRH1-N177YT	0	FALSE	0	0.99	FALSE	1
787	539.243	12	CRH1-N177YT		1	FHNYTLDWAMDK	FHNYTLDWAMDK[787]	2	b	2	8	12	CRH1-N177YT	0	FALSE	0	0.99	FALSE	1
812	539.243	12	CRH1-N177YT		1	FHNYTLDWAMDK	FHNYTLDWAMDK[812]	2	b	2	8	12	CRH1-N177YT	0	FALSE	0	0.99	FALSE	1
837	539.243	12	CRH1-N177YT		1	FHNYTLDWAMDK	FHNYTLDWAMDK[837]	2	b	2	8	12	CRH1-N177YT	0	FALSE	0	0.99	FALSE	1
862	539.243	12	CRH1-N177YT		1	FHNYTLDWAMDK	FHNYTLDWAMDK[862]	2	b	2	8	12	CRH1-N177YT	0	FALSE	0	0.99	FALSE	1
887	539.243	12	CRH1-N177YT		1	FHNYTLDWAMDK	FHNYTLDWAMDK[887]	2	b	2	8	12	CRH1-N177YT	0	FALSE	0	0.99	FALSE	1
912	539.243	12	CRH1-N177YT		1	FHNYTLDWAMDK	FHNYTLDWAMDK[912]	2	b	2	8	12	CRH1-N177YT	0	FALSE	0	0.99	FALSE	1
937	539.243	12	CRH1-N177YT		1	FHNYTLDWAMDK	FHNYTLDWAMDK[937]	2	b	2	8	12	CRH1-N177YT	0	FALSE	0	0.99	FALSE	1
962	539.243	12	CRH1-N177YT		1	FHNYTLDWAMDK	FHNYTLDWAMDK[962]	2	b	2	8	12	CRH1-N177YT	0	FALSE	0	0.99	FALSE	1
987	539.243	12	CRH1-N177YT		1	FHNYTLDWAMDK	FHNYTLDWAMDK[987]	2	b	2	8	12	CRH1-N177YT	0	FALSE	0	0.99	FALSE	1
1012	539.243	12	CRH1-N177YT		1	FHNYTLDWAMDK	FHNYTLDWAMDK[1012]	2	b	2	8	12	CRH1-N177YT	0	FALSE	0	0.99	FALSE	1
1037	539.243	12	CRH1-N177YT		1	FHNYTLDWAMDK	FHNYTLDWAMDK[1037]	2	b	2	8	12	CRH1-N177YT	0	FALSE	0	0.99	FALSE	1
1062	539.243	12	CRH1-N177YT		1	FHNYTLDWAMDK	FHNYTLDWAMDK[1062]	2	b	2	8	12	CRH1-N177YT	0	FALSE	0	0.99	FALSE	1
1087	539.243	12	CRH1-N177YT		1	FHNYTLDWAMDK	FHNYTLDWAMDK[1087]	2	b	2	8	12	CRH1-N177YT	0	FALSE	0	0.99	FALSE	1
1112	539.243	12	CRH1-N177YT		1	FHNYTLDWAMDK	FHNYTLDWAMDK[1112]	2	b	2	8	12	CRH1-N177YT	0	FALSE	0	0.99	FALSE	1
1137	539.243	12	CRH1-N177YT		1	FHNYTLDWAMDK	FHNYTLDWAMDK[1137]	2	b	2	8	12	CRH1-N177YT	0	FALSE	0	0.99	FALSE	1
1162	539.243	12	CRH1-N177YT		1	FHNYTLDWAMDK	FHNYTLDWAMDK[1162]	2	b	2	8	12	CRH1-N177YT	0	FALSE	0	0.99	FALSE	1
1187	539.243	12	CRH1-N177YT		1	FHNYTLDWAMDK	FHNYTLDWAMDK[1187]	2	b	2	8	12	CRH1-N177YT	0	FALSE	0	0.99	FALSE	1
1212	539.243	12	CRH1-N177YT		1	FHNYTLDWAMDK	FHNYTLDWAMDK[1212]	2	b	2	8	12	CRH1-N177YT	0	FALSE	0	0.99	FALSE	1
1237	539.243	12	CRH1-N177YT		1	FHNYTLDWAMDK	FHNYTLDWAMDK[1237]	2	b	2	8	12	CRH1-N177YT	0	FALSE	0	0.99	FALSE	1
412.5	490.231	12	CRH1-N177YT		1	FHNYTLDWAMDK	FHNYTLDWAMDK[412]	2	y	2	8	12	CRH1-N177YT	0	FALSE	0	0.99	FALSE	1
437	490.231	12	CRH1-N177YT		1	FHNYTLDWAMDK	FHNYTLDWAMDK[437]	2	y	2	8	12	CRH1-N177YT	0	FALSE	0	0.99	FALSE	1
462	490.231	12	CRH1-N177YT		1	FHNYTLDWAMDK	FHNYTLDWAMDK[462]	2	y	2	8	12	CRH1-N177YT	0	FALSE	0	0.99	FALSE	1
487	490.231	12	CRH1-N177YT		1	FHNYTLDWAMDK	FHNYTLDWAMDK[487]	2	y	2	8	12	CRH1-N177YT	0	FALSE	0	0.99	FALSE	1
512	490.231	12	CRH1-N177YT		1	FHNYTLDWAMDK	FHNYTLDWAMDK[512]	2	y	2	8	12	CRH1-N177YT	0	FALSE	0	0.99	FALSE	1
537	490.231	12	CRH1-N177YT		1	FHNYTLDWAMDK	FHNYTLDWAMDK[537]	2	y	2	8	12	CRH1-N177YT	0	FALSE	0	0.99	FALSE	1
562	490.231	12	CRH1-N177YT		1	FHNYTLDWAMDK	FHNYTLDWAMDK[562]	2	y	2	8	12	CRH1-N177YT	0	FALSE	0	0.99	FALSE	1
587	490.231	12	CRH1-N177YT		1	FHNYTLDWAMDK	FHNYTLDWAMDK[587]	2	y	2	8	12	CRH1-N177YT	0	FALSE	0	0.99	FALSE	1
612	490.231	12	CRH1-N177YT		1	FHNYTLDWAMDK	FHNYTLDWAMDK[612]	2	y	2	8	12	CRH1-N177YT	0	FALSE	0	0.99	FALSE	1
637	490.231	12	CRH1-N177YT		1	FHNYTLDWAMDK	FHNYTLDWAMDK[637]	2	y	2	8	12	CRH1-N177YT	0	FALSE	0	0.99	FALSE	1
662	490.231	12	CRH1-N177YT		1	FHNYTLDWAMDK	FHNYTLDWAMDK[662]	2	y	2	8	12	CRH1-N177YT	0	FALSE	0	0.99	FALSE	1
687	490.231	12	CRH1-N177YT		1	FHNYTLDWAMDK	FHNYTLDWAMDK[687]	2	y	2	8	12	CRH1-N177YT	0	FALSE	0	0.99	FALSE	1
712	490.231	12	CRH1-N177YT		1	FHNYTLDWAMDK	FHNYTLDWAMDK[712]	2	y	2	8	12	CRH1-N177YT	0	FALSE	0	0.99	FALSE	1
737	490.231	12	CRH1-N177YT		1	FHNYTLDWAMDK	FHNYTLDWAMDK[737]	2	y	2	8	12	CRH1-N177YT	0	FALSE	0	0.99	FALSE	1
762	490.231	12	CRH1-N177YT		1	FHNYTLDWAMDK	FHNYTLDWAMDK[762]	2	y	2	8	12	CRH1-N177YT	0	FALSE	0	0.99	FALSE	1
787	490.231	12	CRH1-N177YT		1	FHNYTLDWAMDK	FHNYTLDWAMDK[787]	2	y	2	8	12	CRH1-N177YT	0	FALSE	0	0.99	FALSE	1
812	490.231	12	CRH1-N177YT		1	FHNYTLDWAMDK	FHNYTLDWAMDK[812]	2	y	2	8	12	CRH1-N177YT	0	FALSE	0	0.99	FALSE	1
837	490.231	12	CRH1-N177YT		1	FHNYTLDWAMDK	FHNYTLDWAMDK[837]	2	y	2	8	12	CRH1-N177YT	0	FALSE	0	0.99	FALSE	1
862	490.231	12	CRH1-N177YT		1	FHNYTLDWAMDK	FHNYTLDWAMDK[862]	2	y	2	8	12	CRH1-N177YT	0	FALSE	0	0.99	FALSE	1
887	490.231	12	CRH1-N177YT		1	FHNYTLDWAMDK	FHNYTLDWAMDK[887]	2	y	2	8	12	CRH1-N177YT	0	FALSE	0	0.99	FALSE	1
912	490.231	12	CRH1-N177YT		1	FHNYTLDWAMDK	FHNYTLDWAMDK[912]	2	y	2	8	12	CRH1-N177YT	0	FALSE	0	0.99	FALSE	1
937	490.231	12	CRH1-N177YT		1	FHNYTLDWAMDK	FHNYTLDWAMDK[937]	2	y	2	8	12	CRH1-N177YT	0	FALSE	0	0.99	FALSE	1
962	490.231	12	CRH1-N177YT		1	FHNYTLDWAMDK	FHNYTLDWAMDK[962]	2	y	2	8	12	CRH1-N177YT	0	FALSE	0	0.99	FALSE	1
987	490.231	12	CRH1-N177YT		1	FHNYTLDWAMDK	FHNYTLDWAMDK[987]	2	y	2	8	12	CRH1-N177YT	0	FALSE	0	0.99	FALSE	1
1012	490.231	12	CRH1-N177YT		1	FHNYTLDWAMDK	FHNYTLDWAMDK[1012]	2	y	2	8	12	CRH1-N177YT	0	FALSE	0	0.99	FALSE	1
1037	490.231	12	CRH1-N177YT		1	FHNYTLDWAMDK	FHNYTLDWAMDK[1037]	2	y	2	8	12	CRH1-N177YT	0	FALSE	0	0.99	FALSE	1
1062	490.231	12	CRH1-N177YT		1	FHNYTLDWAMDK	FHNYTLDWAMDK[1062]	2	y	2	8	12	CRH1-N177YT	0	FALSE	0	0.99	FALSE	1
1087	490.231	12	CRH1-N177YT		1	FHNYTLDWAMDK	FHNYTLDWAMDK[1087]	2	y	2	8	12	CRH1-N177YT	0	FALSE	0	0.99	FALSE	1
1112	490.231	12	CRH1-N177YT		1	FHNYTLDWAMDK	FHNYTLDWAMDK[1112]	2	y	2	8	12	CRH1-N177YT	0	FALSE	0	0.99	FALSE	1
1137	490.231	12	CRH1-N177YT		1	FHNYTLDWAMDK	FHNYTLDWAMDK[1137]	2	y	2	8	12	CRH1-N177YT	0	FALSE	0	0.99	FALSE	1
1162	490.231	12	CRH1-N177YT		1	FHNYTLDWAMDK	FHNYTLDWAMDK[1162]	2	y	2	8	12	CRH1-N177YT	0	FALSE	0	0.99	FALSE	1
1187	490.231	12	CRH1-N177YT		1	FHNYTLDWAMDK	FHNYTLDWAMDK[1187]	2	y	2	8	12	CRH1-N177YT	0	FALSE	0	0.99	FALSE	1
1212	490.231	12	CRH1-N177YT		1	FHNYTLDWAMDK	FHNYTLDWAMDK[1212]	2	y	2	8	12	CRH1-N177YT	0	FALSE	0	0.99	FALSE	1
1237	490.231	12	CRH1-N177YT		1	FHNYTLDWAMDK	FHNYTLDWAMDK[1237]	2	y	2	8	12	CRH1-N177YT	0	FALSE	0	0.99	FALSE	1
412.5	1148.52	12	CRH1-N177YT		1	FHNYTLDWAMDK	FHNYTLDWAMDK[412]	2	b	1	9	12	CRH1-N177YT	0	FALSE	0	0.99	FALSE	1
437	1148.52	12	CRH1-N177YT		1	FHNYTLDWAMDK	FHNYTLDWAMDK[437]	2	b	1	9	12	CRH1-N177YT	0	FALSE	0	0.99	FALSE	1
462	1148.52	12	CRH1-N177YT		1	FHNYTLDWAMDK	FHNYTLDWAMDK[462]	2	b	1	9	12	CRH1-N177YT	0	FALSE	0	0.99	FALSE	1
487	1148.52	12	CRH1-N177YT		1	FHNYTLDWAMDK	FHNYTLDWAMDK[487]	2	b	1	9	12	CRH1-N177YT	0	FALSE	0	0.99	FALSE	1
512	1148.52	12	CRH1-N177YT		1	FHNYTLDWAMDK	FHNYTLDWAMDK[512]	2	b	1	9	12	CRH1-N177YT	0	FALSE	0	0.99	FALSE	1
537	1148.52	12	CRH1-N177YT		1	FHNYTLDWAMDK	FHNYTLDWAMDK[537]	2	b	1	9	12	CRH1-N177YT	0	FALSE	0	0.99	FALSE	1
562	1148.52	12	CRH1-N177YT		1	FHNYTLDWAMDK	FHNYTLDWAMDK[562]	2	b	1	9	12	CRH1-N177YT	0	FALSE	0	0.99	FALSE	1
587	1148.52	12	CRH1-N177YT		1	FHNYTLDWAMDK	FHNYTLDWAMDK[587]	2	b	1	9	12	CRH1-N177YT	0	FALSE	0	0.99	FALSE	1
612	1148.52	12	CRH1-N177YT		1	FHNYTLDWAMDK	FHNYTLDWAMDK[612]	2	b	1	9	12	CRH1-N177YT	0	FALSE	0	0.99	FALSE	1
637	1148.52	12	CRH1-N177YT		1	FHNYTLDWAMDK	FHNYTLDWAMDK[637]	2	b	1	9	12	CRH1-N177YT	0	FALSE	0	0.99	FALSE	1
662	1148.52	12	CRH1-N177YT		1	FHNYTLDWAMDK	FHNYTLDWAMDK[662]	2	b	1	9	12	CRH1-N177YT	0	FALSE	0	0.99	FALSE	1
687	1148.52	12	CRH1-N177YT		1	FHNYTLDWAMDK	FHNYTLDWAMDK[687]	2	b	1	9	12	CRH1-N177YT	0	FALSE	0	0.99	FALSE	1
712	1148.52	12	CRH1-N177YT		1	FHNYTLDWAMDK	FHNYTLDWAMDK[712]	2	b	1	9	12	CRH1-N177YT	0	FALSE	0	0.99	FALSE	1
737	1148.52	12	CRH1-N177YT		1	FHNYTLDWAMDK	FHNYTLDWAMDK[737]	2	b	1	9	12	CRH1-N177YT	0	FALSE	0	0.99	FALSE	1
762	1148.52	12	CRH1-N177YT		1	FHNYTLDWAMDK	FHNYTLDWAMDK[762]	2	b	1	9	12	CRH1-N177YT	0	FALSE	0	0.99	FALSE	1
787	1148.52	12	CRH1-N177YT		1	FHNYTLDWAMDK	FHNYTLDWAMDK[787]	2	b	1	9	12	CRH1-N177YT	0	FALSE	0	0.99	FALSE	1
812	1148.52	12	CRH1-N177YT		1	FHNYTLDWAMDK	FHNYTLDWAMDK[812]	2	b	1	9	12	CRH1-N177YT	0	FALSE	0	0.99	FALSE	1
837	1148.52	12	CRH1-N177YT		1	FHNYTLDWAMDK	FHNYTLDWAMDK[837]	2	b	1	9	12	CRH1-N177YT	0	FALSE	0	0.99	FALSE	1
862	1148.52	12	CRH1-N177YT		1	FHNYTLDWAMDK	FHNYTLDWAMDK[862]	2	b	1	9	12	CRH1-N177YT	0	FALSE	0	0.99	FALSE	1
887	1148.52	12	CRH1-N177YT		1	FHNYTLDWAMDK	FHNYTLDWAMDK[887]	2	b	1	9	12	CRH1-N177YT	0	FALSE	0	0.99	FALSE	1
912	1148.52	12	CRH1-N177YT		1	FHNYTLDWAMDK	FHNYTLDWAMDK[912]	2	b	1	9	12	CRH1-N177YT	0	FALSE	0	0.99	FALSE	1
937	1148.52	12	CRH1-N177YT		1	FHNYTLDWAMDK	FHNYTLDWAMDK[937]	2	b	1	9	12	CRH1-N177YT	0	FALSE	0	0.99	FALSE	1
962	1148.52	12	CRH1-N177YT		1	FHNYTLDWAMDK	FHNYTLDWAMDK[962]	2	b	1	9	12	CRH1-N177YT	0	FALSE	0	0.99	FALSE	1
987	1148.52	12	CRH1-N177YT		1	FHNYTLDWAMDK	FHNYTLDWAMDK[987]	2	b	1	9	12	CRH1-N177YT	0	FALSE	0	0.99	FALSE	1
1012	1148.52	12	CRH1-N177YT		1	FHNYTLDWAMDK	FHNYTLDWAMDK[1012]	2	b	1	9	12	CRH1-N177YT	0	FALSE	0	0.99	FALSE	1
1037	1148.52	12	CRH1-N177YT		1	FHNYTLDWAMDK	FHNYTLDWAMDK[1037]	2	b	1	9	12	CRH1-N177YT	0	FALSE	0	0.99	FALSE	1
1062	1148.52	12	CRH1-N177YT		1	FHNYTLDWAMDK	FHNYTLDWAMDK[1062]	2	b	1	9	12	CRH1-N177YT	0	FALSE	0	0.99	FALSE	1
1087	1148.52	12	CRH1-N177YT		1	FHNYTLDWAMDK	FHNYTLDWAMDK[1087]	2	b	1	9	12	CRH1-N177YT	0	FALSE	0	0.99	FALSE	1
1112	1148.52	12	CRH1-N177YT		1	FHNYTLDWAMDK	FHNYTLDWAMDK[1112]	2	b	1	9	12	CRH1-N177YT	0	FALSE	0	0.99	FALSE	1
1137	1148.52	12	CRH1-N177YT		1	FHNYTLDWAMDK	FHNYTLDWAMDK[1137]	2	b	1	9	12	CRH1-N177YT	0	FALSE	0	0.99	FALSE	1
1162	1148.52	12	CRH1-N177YT		1	FHNYTLDWAMDK	FHNYTLDWAMDK[1162]	2	b	1	9	12	CRH1-N177YT	0	FALSE	0	0.99	FALSE	1
1187	1148.52	12	CRH1-N177YT		1	FHNYTLDWAMDK	FHNYTLDWAMDK[1187]	2	b	1	9	12	CRH1-N177YT	0	FALSE	0	0.99	FALSE	1
1212	1148.52	12	CRH1-N177YT		1	FHNYTLDWAMDK	FHNYTLDWAMDK[1212]	2	b	1	9	12	CRH1-N177YT	0	FALSE	0	0.99	FALSE	1
1237	1148.52	12	CRH1-N177YT		1	FHNYTLDWAMDK	FHNYTLDWAMDK[1237]	2	b	1	9	12	CRH1-N177YT	0	FALSE	0	0.99	FALSE	1
412.5	1142.52	12	CRH1-N177YT		1	FHNYTLDWAMDK	FHNYTLDWAMDK[412]	2	y	1	9	12	CRH1-N177YT	0	FALSE	0	0.99	FALSE	1
437	1142.52	12	CRH1-N177YT		1	FHNYTLDWAMDK	FHNYTLDWAMDK[437]	2	y	1	9	12	CRH1-N177YT	0	FALSE	0	0.99	FALSE	1
462	1142.52	12	CRH1-N177YT		1	FHNYTLDWAMDK	FHNYTLDWAMDK[462]	2	y	1	9	12	CRH1-N177YT	0	FALSE	0	0.99	FALSE	1
487	1142.52	12	CRH1-N177YT		1	FHNYTLDWAMDK	FHNYTLDWAMDK[487]	2	y	1	9	12	CRH1-N177YT	0	FALSE	0	0.99	FALSE	1
512	1142.52	12	CRH1-N177YT		1	FHNYTLDWAMDK	FHNYTLDWAMDK[512]	2	y	1	9	12	CRH1-N177YT	0	FALSE	0	0.99	FALSE	1
537	1142.52	12	CRH1-N177YT		1	FHNYTLDWAMDK	FHNYTLDWAMDK[537]	2	y	1	9	12	CRH1-N177YT	0	FALSE	0	0.99	FALSE	1
562	1142.52	12	CRH1-N177YT		1	FHNYTLDWAMDK	FHNYTLDWAMDK[562]	2	y	1	9	12	CRH1-N177YT	0	FALSE	0	0.99	FALSE	1
587	1142.52	12	CRH1-N177YT		1	FHNYTLDWAMDK	FHNYTLDWAMDK[587]	2	y	1	9	12	CRH1-N177YT	0	FALSE	0	0.99	FALSE	1
612	1142.52	12	CRH1-N177YT		1	FHNYTLDWAMDK	FHNYTLDWAMDK[612]	2	y	1	9	12	CRH1-N177YT	0	FALSE	0	0.99	FALSE	1
637	1142.52	12	CRH1-N177YT		1	FHNYTLDWAMDK	FHNYTLDWAMDK[637]	2	y	1	9	12	CRH1-N177YT	0	FALSE	0	0.99	FALSE	1
662	1142.52	12	CRH1-N177YT		1	FHNYTLDWAMDK	FHNYTLDWAMDK[662]	2	y	1	9	12	CRH1-N177YT	0	FALSE	0	0.99	FALSE	1
687	1142.52	12	CRH1-N177YT		1	FHNYTLDWAMDK	FHNYTLDWAMDK[687]	2	y	1	9	12	CRH1-N177YT	0	FALSE	0	0.99	FALSE	1
712	1142.52	12	CRH1-N177YT		1	FHNYTLDWAMDK	FHNYTLDWAMDK[712]	2	y	1	9	12	CRH1-N177YT	0	FALSE	0	0.99	FALSE	1
737	1142.52	12	CRH1-N177YT		1	FHNYTLDWAMDK	FHNYTLDWAMDK[737]	2	y	1	9	12	CRH1-N177YT	0	FALSE	0	0.99	FALSE	1
762	1142.52	12	CRH1-N177YT		1	FHNYTLDWAMDK	FHNYTLDWAMDK[762]	2	y	1	9	12	CRH1-N177YT	0	FALSE	0	0.99	FALSE	1
787	1142.52	12	CRH1-N177YT		1	FHNYTLDWAMDK	FHNYTLDWAMDK[787]	2	y	1	9	12	CRH1-N177YT	0	FALSE	0	0.99	FALSE	1
812	1142.52	12	CRH1-N177YT		1	FHNYTLDWAMDK	FHNYTLDWAMDK[812]	2	y	1	9	12	CRH1-N177YT	0	FALSE	0	0.99	FALSE	1
837	1142.52	12	CRH1-N177YT		1	FHNYTLDWAMDK	FHNYTLDWAMDK[837]	2	y	1	9	12	CRH1-N177YT	0	FALSE	0	0.99	FALSE	1
862	1142.52	12	CRH1-N177YT		1	FHNYTLDWAMDK	FHNYTLDWAMDK[862]	2	y	1	9	12	CRH1-N177YT	0	FALSE	0	0.99	FALSE	1
887	1142.52	12	CRH1-N177YT		1	FHNYTLDWAMDK	FHNYTLDWAMDK[887]	2	y	1	9	12	CRH1-N177YT	0	FALSE	0	0.99	FALSE	1
912	1142.52	12	CRH1-N177YT		1	FHNYTLDWAMDK	FHNYTLDWAMDK[912]	2	y	1	9	12	CRH1-N177YT	0	FALSE	0	0.99	FALSE	1
937	1142.52	12	CRH1-N177YT		1	FHNYTLDWAMDK	FHNYTLDWAMDK[937]	2	y	1	9	12	CRH1-N177YT	0	FALSE	0	0.99	FALSE	1
962	1142.52	12	CRH1-N177YT		1	FHNYTLDWAMDK	FHNYTLDWAMDK[962]	2	y	1	9	12	CRH1-N177YT	0	FALSE	0	0.99	FALSE	1
987	1142.52	12	CRH1-N177YT		1	FHNYTLDWAMDK	FHNYTLDWAMDK[987]	2	y	1	9	12	CRH1-N177YT	0	FALSE	0	0.99	FALSE	1
1012	1142.52	12	CRH1-N177YT		1	FHNYTLDWAMDK	FHNYTLDWAMDK[1012]	2	y	1	9	12	CRH1-N177YT	0	FALSE	0	0.99	FALSE	1
1037	1142.52	12	CRH1-N177YT		1	FHNYTLDWAMDK	FHNYTLDWAMDK[1037]	2	y	1	9	12	CRH1-N177YT	0	FALSE	0	0.99	FALSE	1
1062	1142.52	12	CRH1-N177YT		1	FHNYTLDWAMDK	FHNYTLDWAMDK[1062]	2	y	1	9	12	CRH1-N177YT	0	FALSE	0	0.99	FALSE	1
1087	1142.52	12	CRH1-N177YT		1	FHNYTLDWAMDK	FHNYTLDWAMDK[1087]	2	y	1	9	12	CRH1-N177YT	0	FALSE	0	0.99	FALSE	1
1112	1142.52	12	CRH1-N177YT		1	FHNYTLDWAMDK	FHNYTLDWAMDK[1112]	2	y	1	9	12	CRH1-N177YT	0	FALSE	0	0.99	FALSE	1
1137	1142.52	12	CRH1-N177YT		1	FHNYTLDWAMDK	FHNYTLDWAMDK[1137]	2	y	1	9	12	CRH1-N177YT	0	FALSE	0	0.99	FALSE	1
1162	1142.52	12	CRH1-N177YT		1	FHNYTLDWAMDK	FHNYTLDWAMDK[1162]	2	y	1	9	12	CRH1-N177YT	0	FALSE	0	0.99	FALSE	1
1187	1142.52	12	CRH1-N177YT		1	FHNYTLDWAMDK	FHNYTLDWAMDK[1187]	2	y	1	9	12	CRH1-N177YT	0	FALSE	0	0.99	FALSE	1
1212	1142.52	12	CRH1-N177YT		1	FHNYTLDWAMDK	FHNYTLDWAMDK[1212]	2	y	1	9	12	CRH1-N177YT	0	FALSE	0	0.99	FALSE	1
1237	1142.52	12	CRH1-N177YT		1	FHNYTLDWAMDK	FHNYTLDWAMDK[1237]	2	y	1	9	12	CRH1-N177YT	0	FALSE	0	0.99	FALSE	1
412.5	574.762	12	CRH1-N177YT		1	FHNYTLDWAMDK	FHNYTLDWAMDK[412]	2	b	2	9	12	CRH1-N177YT	0	FALSE	0	0.99	FALSE	1
437	574.762	12	CRH1-N177YT		1	FHNYTLDWAMDK	FHNYTLDWAMDK[437]	2	b	2	9	12	CRH1-N177YT	0	FALSE	0	0.99	FALSE	1
462	574.762	12	CRH1-N177YT		1	FHNYTLDWAMDK	FHNYTLDWAMDK[462]	2	b	2	9	12	CRH1-N177YT	0	FALSE	0	0.99	FALSE	1
487	574.762	12	CRH1-N177YT		1	FHNYTLDWAMDK	FHNYTLDWAMDK[487]	2	b	2	9	12	CRH1-N177YT	0	FALSE	0	0.99	FALSE	1
512	574.762	12	CRH1-N177YT		1	FHNYTLDWAMDK	FHNYTLDWAMDK[512]	2	b	2	9	12	CRH1-N177YT	0	FALSE	0	0.99	FALSE	1
537	574.762	12	CRH1-N177YT		1	FHNYTLDWAMDK	FHNYTLDWAMDK[537]	2	b	2	9	12	CRH1-N177YT	0	FALSE	0	0.99	FALSE	1
562	574.762	12	CRH1-N177YT		1	FHNYTLDWAMDK	FHNYTLDWAMDK[562]	2	b	2	9	12	CRH1-N177YT	0	FALSE	0	0.99	FALSE	1
587	574.762	12	CRH1-N177YT		1	FHNYTLDWAMDK	FHNYTLDWAMDK[587]	2	b	2	9	12	CRH1-N177YT	0	FALSE	0	0.99	FALSE	1
612	574.762	12	CRH1-N177YT		1	FHNYTLDWAMDK	FHNYTLDWAMDK[612]	2	b	2	9	12	CRH1-N177YT	0	FALSE	0	0.99	FALSE	1
637	574.762	12	CRH1-N177YT		1	FHNYTLDWAMDK	FHNYTLDWAMDK[637]	2	b	2	9	12	CRH1-N177YT	0	FALSE	0	0.99	FALSE	1
662	574.762	12	CRH1-N177YT		1	FHNYTLDWAMDK	FHNYTLDWAMDK[662]	2	b	2	9	12	CRH1-N177YT	0	FALSE	0	0.99	FALSE	1
687	574.762	12	CRH1-N177YT		1	FHNYTLDWAMDK	FHNYTLDWAMDK[687]	2	b	2	9	12	CRH1-N177YT	0	FALSE	0	0.99	FALSE	1
712	574.762	12	CRH1-N177YT		1	FHNYTLDWAMDK	FHNYTLDWAMDK[712]	2	b	2	9	12	CRH1-N177YT	0	FALSE	0	0.99	FALSE	1
737	574.762	12	CRH1-N177YT		1	FHNYTLDWAMDK	FHNYTLDWAMDK[737]	2	b	2	9	12	CRH1-N177YT	0	FALSE	0	0.99	FALSE	1
762	574.762	12	CRH1-N177YT		1	FHNYTLDWAMDK	FHNYTLDWAMDK[762]	2	b	2	9	12	CRH1-N177YT	0	FALSE	0	0.99	FALSE	1
787	574.762	12	CRH1-N177YT		1	FHNYTLDWAMDK	FHNYTLDWAMDK[787]	2	b	2	9	12	CRH1-N177YT	0	FALSE	0	0.99	FALSE	1
812	574.762	12	CRH1-N177YT		1	FHNYTLDWAMDK	FHNYTLDWAMDK[812]	2	b	2	9	12	CRH1-N177YT	0	FALSE	0	0.99	FALSE	1
837	574.762	12	CRH1-N177YT		1	FHNYTLDWAMDK	FHNYTLDWAMDK[837]	2	b	2	9	12	CRH1-N177YT	0	FALSE	0	0.99	FALSE	1
862	574.762	12	CRH1-N177YT		1	FHNYTLDWAMDK	FHNYTLDWAMDK[862]	2	b	2	9	12	CRH1-N177YT	0	FALSE	0	0.99	FALSE	1
887	574.762	12	CRH1-N177YT		1	FHNYTLDWAMDK	FHNYTLDWAMDK[887]	2	b	2	9	12	CRH1-N177YT	0	FALSE	0	0.99	FALSE	1
912	574.762	12	CRH1-N177YT		1	FHNYTLDWAMDK	FHNYTLDWAMDK[912]	2	b	2	9	12	CRH1-N177YT	0	FALSE	0	0.99	FALSE	1
937	574.762	12	CRH1-N177YT		1	FHNYTLDWAMDK	FHNYTLDWAMDK[937]	2	b	2	9	12	CRH1-N177YT	0	FALSE	0	0.99	FALSE	1
962	574.762	12	CRH1-N177YT		1	FHNYTLDWAMDK	FHNYTLDWAMDK[962]	2	b	2	9	12	CRH1-N177YT	0	FALSE	0	0.99	FALSE	1
987	574.762	12	CRH1-N177YT		1	FHNYTLDWAMDK	FHNYTLDWAMDK[987]	2	b	2	9	12	CRH1-N177YT	0	FALSE	0	0.99	FALSE	1
1012	574.762	12	CRH1-N177YT		1	FHNYTLDWAMDK	FHNYTLDWAMDK[1012]	2	b	2	9	12	CRH1-N177YT	0	FALSE	0	0.99	FALSE	1
1037	574.762	12	CRH1-N177YT		1	FHNYTLDWAMDK	FHNYTLDWAMDK[1037]	2	b	2	9	12	CRH1-N177YT	0	FALSE	0	0.99	FALSE	1
1062	574.762	12	CRH1-N177YT		1	FHNYTLDWAMDK	FHNYTLDWAMDK[1062]	2	b	2	9	12	CRH1-N177YT	0	FALSE	0	0.99	FALSE	1
1087	574.762	12	CRH1-N177YT		1	FHNYTLDWAMDK	FHNYTLDWAMDK[1087]	2	b	2	9	12	CRH1-N177YT	0	FALSE	0	0.99	FALSE	1
1112	574.762	12	CRH1-N177YT		1	FHNYTLDWAMDK	FHNYTLDWAMDK[1112]	2	b	2	9	12	CRH1-N177YT	0	FALSE	0	0.99	FALSE	1
1137	574.762	12	CRH1-N177YT		1	FHNYTLDWAMDK	FHNYTLDWAMDK[1137]	2	b	2	9	12	CRH1-N177YT	0	FALSE	0	0.99	FALSE	1
1162	574.762	12	CRH1-N177YT		1	FHNYTLDWAMDK	FHNYTLDWAMDK[1162]	2	b	2	9	12	CRH1-N177YT	0	FALSE	0	0.99	FALSE	1
1187	574.762	12	CRH1-N177YT		1	FHNYTLDWAMDK	FHNYTLDWAMDK[1187]	2	b	2	9	12	CRH1-N177YT	0	FALSE	0	0.99	FALSE	1
1212	574.762	12	CRH1-N177YT		1	FHNYTLDWAMDK	FHNYTLDWAMDK[1212]	2	b	2	9	12	CRH1-N177YT	0	FALSE	0	0.99	FALSE	1
1237	574.762	12	CRH1-N177YT		1	FHNYTLDWAMDK	FHNYTLDWAMDK[1237]	2	b	2	9	12	CRH1-N177YT	0	FALSE	0	0.99	FALSE	1
412.5	571.763	12	CRH1-N177YT		1	FHNYTLDWAMDK	FHNYTLDWAMDK[412]	2	y	2	9	12	CRH1-N177YT	0	FALSE	0	0.99	FALSE	1
437	571.763	12	CRH1-N177YT		1	FHNYTLDWAMDK	FHNYTLDWAMDK[437]	2	y	2	9	12	CRH1-N177YT	0	FALSE	0	0.99	FALSE	1
462	571.763	12	CRH1-N177YT		1	FHNYTLDWAMDK	FHNYTLDWAMDK[462]	2	y	2	9	12	CRH1-N177YT	0	FALSE	0	0.99	FALSE	1
487	571.763	12	CRH1-N177YT		1	FHNYTLDWAMDK	FHNYTLDWAMDK[487]	2	y	2	9	12	CRH1-N177YT	0	FALSE	0	0.99	FALSE	1
512	571.763	12	CRH1-N177YT		1	FHNYTLDWAMDK	FHNYTLDWAMDK[512]	2	y	2	9	12	CRH1-N177YT	0	FALSE	0	0.99	FALSE	1
537	571.763	12	CRH1-N177YT		1	FHNYTLDWAMDK	FHNYTLDWAMDK[537]	2	y	2	9	12	CRH1-N177YT	0	FALSE	0	0.99	FALSE	1
562	571.763	12	CRH1-N177YT		1	FHNYTLDWAMDK	FHNYTLDWAMDK[562]	2	y	2	9	12	CRH1-N177YT	0	FALSE	0	0.99	FALSE	1
587	571.763	12	CRH1-N177YT		1	FHNYTLDWAMDK	FHNYTLDWAMDK[587]	2	y	2	9	12	CRH1-N177YT	0	FALSE	0	0.99	FALSE	1
612	571.763	12	CRH1-N177YT		1	FHNYTLDWAMDK	FHNYTLDWAMDK[612]	2	y	2	9	12	CRH1-N177YT	0	FALSE	0	0.99	FALSE	1
637	571.763	12	CRH1-N177YT		1	FHNYTLDWAMDK	FHNYTLDWAMDK[637]	2	y	2	9	12	CRH1-N177YT	0	FALSE	0	0.99	FALSE	1
662	571.763	12	CRH1-N177YT		1	FHNYTLDWAMDK	FHNYTLDWAMDK[662]	2	y	2	9	12	CRH1-N177YT	0	FALSE	0	0.99	FALSE	1
687	571.763	12	CRH1-N177YT		1	FHNYTLDWAMDK	FHNYTLDWAMDK[687]	2	y	2	9	12	CRH1-N177YT	0	FALSE	0	0.99	FALSE	1
712	571.763	12	CRH1-N177YT		1	FHNYTLDWAMDK	FHNYTLDWAMDK[712]	2	y	2	9	12	CRH1-N177YT	0	FALSE	0	0.99	FALSE	1
737	571.763	12	CRH1-N177YT		1	FHNYTLDWAMDK	FHNYTLDWAMDK[737]	2	y	2	9	12	CRH1-N177YT	0	FALSE	0	0.99	FALSE	1
762	571.763	12	CRH1-N177YT		1	FHNYTLDWAMDK	FHNYTLDWAMDK[762]	2	y	2	9	12	CRH1-N177YT	0	FALSE	0	0.99	FALSE	1
787	571.763	12	CRH1-N177YT		1	FHNYTLDWAMDK	FHNYTLDWAMDK[787]	2	y	2	9	12	CRH1-N177YT	0	FALSE	0	0.99	FALSE	1
812	571.763	12	CRH1-N177YT		1	FHNYTLDWAMDK	FHNYTLDWAMDK[812]	2	y	2	9	12	CRH1-N177YT	0	FALSE	0	0.99	FALSE	1
837	571.763	12	CRH1-N177YT		1	FHNYTLDWAMDK	FHNYTLDWAMDK[837]	2	y	2	9	12	CRH1-N177YT	0	FALSE	0	0.99	FALSE	1
862	571.763	12	CRH1-N177YT		1	FHNYTLDWAMDK	FHNYTLDWAMDK[862]	2	y	2	9	12	CRH1-N177YT	0	FALSE	0	0.99	FALSE	1
887	571.763	12	CRH1-N177YT		1	FHNYTLDWAMDK	FHNYTLDWAMDK[887]	2	y	2	9	12	CRH1-N177YT	0	FALSE	0	0.99	FALSE	1
912	571.763	12	CRH1-N177YT		1	FHNYTLDWAMDK	FHNYTLDWAMDK[912]	2	y	2	9	12	CRH1-N177YT	0	FALSE	0	0.99	FALSE	1
937	571.763	12	CRH1-N177YT		1	FHNYTLDWAMDK	FHNYTLDWAMDK[937]	2	y	2	9	12	CRH1-N177YT	0	FALSE	0	0.99	FALSE	1
962	571.763	12	CRH1-N177YT		1	FHNYTLDWAMDK	FHNYTLDWAMDK[962]	2	y	2	9	12	CRH1-N177YT	0	FALSE	0	0.99	FALSE	1
987	571.763	12	CRH1-N177YT		1	FHNYTLDWAMDK	FHNYTLDWAMDK[987]	2	y	2	9	12	CRH1-N177YT	0	FALSE	0	0.99	FALSE	1
1012	571.763	12	CRH1-N177YT		1	FHNYTLDWAMDK	FHNYTLDWAMDK[1012]	2	y	2	9	12	CRH1-N177YT	0	FALSE	0	0.99	FALSE	1
1037	571.763	12	CRH1-N177YT		1	FHNYTLDWAMDK	FHNYTLDWAMDK[1037]	2	y	2	9	12	CRH1-N177YT	0	FALSE	0	0.99	FALSE	1
1062	571.763	12	CRH1-N177YT		1	FHNYTLDWAMDK	FHNYTLDWAMDK[1062]	2	y	2	9	12	CRH1-N177YT	0	FALSE	0	0.99	FALSE	1
1087	571.763	12	CRH1-N177YT		1	FHNYTLDWAMDK	FHNYTLDWAMDK[1087]	2	y	2	9	12	CRH1-N177YT	0	FALSE	0	0.99	FALSE	1
1112	571.763	12	CRH1-N177YT		1	FHNYTLDWAMDK	FHNYTLDWAMDK[1112]	2	y	2	9	12	CRH1-N177YT	0	FALSE	0	0.99	FALSE	1
1137	571.763	12	CRH1-N177YT		1	FHNYTLDWAMDK	FHNYTLDWAMDK[1137]	2	y	2	9	12	CRH1-N177YT	0	FALSE	0	0.99	FALSE	1
1162	571.763	12	CRH1-N177YT		1	FHNYTLDWAMDK	FHNYTLDWAMDK[1162]	2	y	2	9	12	CRH1-N177YT	0	FALSE	0	0.99	FALSE	1
1187	571.763	12	CRH1-N177YT		1	FHNYTLDWAMDK	FHNYTLDWAMDK[1187]	2	y	2	9	12	CRH1-N177YT	0	FALSE	0	0.99	FALSE	1
1212	571.763	12	CRH1-N177YT		1	FHNYTLDWAMDK	FHNYTLDWAMDK[1212]	2	y	2	9	12	CRH1-N177YT	0	FALSE	0	0.99	FALSE	1
1237	571.763	12	CRH1-N177YT		1	FHNYTLDWAMDK	FHNYTLDWAMDK[1237]	2	y	2	9	12	CRH1-N177YT	0	FALSE	0	0.99	FALSE	1
412.5	1279.56	12	CRH1-N177YT		1	FHNYTLDWAMDK	FHNYTLDWAMDK[412]	2	b	1	10	12	CRH1-N177YT	0	FALSE	0	0.99	FALSE	1
437	1279.56	12	CRH1-N177YT		1	FHNYTLDWAMDK	FHNYTLDWAMDK[437]	2	b	1	10	12	CRH1-N177YT	0	FALSE	0	0.99	FALSE	1
462	1279.56	12	CRH1-N177YT		1	FHNYTLDWAMDK	FHNYTLDWAMDK[462]	2	b	1	10	12	CRH1-N177YT	0	FALSE	0	0.99	FALSE	1
487	1279.56	12	CRH1-N177YT		1	FHNYTLDWAMDK	FHNYTLDWAMDK[487]	2	b	1	10	12	CRH1-N177YT	0	FALSE	0	0.99	FALSE	1
512	1279.56	12	CRH1-N177YT		1	FHNYTLDWAMDK	FHNYTLDWAMDK[512]	2	b	1	10	12	CRH1-N177YT	0	FALSE	0	0.99	FALSE	1
537	1279.56	12	CRH1-N177YT		1	FHNYTLDWAMDK	FHNYTLDWAMDK[537]	2	b	1	10	12	CRH1-N177YT	0	FALSE	0	0.99	FALSE	1
562	1279.56	12	CRH1-N177YT		1	FHNYTLDWAMDK	FHNYTLDWAMDK[562]	2	b	1	10	12	CRH1-N177YT	0	FALSE	0	0.99	FALSE	1
587	1279.56	12	CRH1-N177YT		1	FHNYTLDWAMDK	FHNYTLDWAMDK[587]	2	b	1	10	12	CRH1-N177YT	0	FALSE	0	0.99	FALSE	1
612	1279.56	12	CRH1-N177YT		1	FHNYTLDWAMDK	FHNYTLDWAMDK[612]	2	b	1	10	12	CRH1-N177YT	0	FALSE	0	0.99	FALSE	1
637	1279.56	12	CRH1-N177YT		1	FHNYTLDWAMDK	FHNYTLDWAMDK[637]	2	b	1	10	12	CRH1-N177YT	0	FALSE	0	0.99	FALSE	1
662	1279.56	12	CRH1-N177YT		1	FHNYTLDWAMDK	FHNYTLDWAMDK[662]	2	b	1	10	12	CRH1-N177YT	0	FALSE	0	0.99	FALSE	1
687	1279.56	12	CRH1-N177YT		1	FHNYTLDWAMDK	FHNYTLDWAMDK[687]	2	b	1	10	12	CRH1-N177YT	0	FALSE	0	0.99	FALSE	1
712	1279.56	12	CRH1-N177YT		1	FHNYTLDWAMDK	FHNYTLDWAMDK[712]	2	b	1	10	12	CRH1-N177YT	0	FALSE	0	0.99	FALSE	1
737	1279.56	12	CRH1-N177YT		1	FHNYTLDWAMDK	FHNYTLDWAMDK[737]	2	b	1	10	12	CRH1-N177YT	0	FALSE	0	0.99	FALSE	1
762	1279.56	12	CRH1-N177YT		1	FHNYTLDWAMDK	FHNYTLDWAMDK[762]	2	b	1	10	12	CRH1-N177YT	0	FALSE	0	0.99	FALSE	1
787	1279.56	12	CRH1-N177YT		1	FHNYTLDWAMDK	FHNYTLDWAMDK[787]	2	b	1	10	12	CRH1-N177YT	0	FALSE	0	0.99	FALSE	1
812	1279.56	12	CRH1-N177YT		1	FHNYTLDWAMDK	FHNYTLDWAMDK[812]	2	b	1	10	12	CRH1-N177YT	0	FALSE	0	0.99	FALSE	1
837	1279.56	12	CRH1-N177YT		1	FHNYTLDWAMDK	FHNYTLDWAMDK[837]	2	b	1	10	12	CRH1-N177YT	0	FALSE	0	0.99	FALSE	1
862	1279.56	12	CRH1-N177YT		1	FHNYTLDWAMDK	FHNYTLDWAMDK[862]	2	b	1	10	12	CRH1-N177YT	0	FALSE	0	0.99	FALSE	1
887	1279.56	12	CRH1-N177YT		1	FHNYTLDWAMDK	FHNYTLDWAMDK[887]	2	b	1	10	12	CRH1-N177YT	0	FALSE	0	0.99	FALSE	1
912	1279.56	12	CRH1-N177YT		1	FHNYTLDWAMDK	FHNYTLDWAMDK[912]	2	b	1	10	12	CRH1-N177YT	0	FALSE	0	0.99	FALSE	1
937	1279.56	12	CRH1-N177YT		1	FHNYTLDWAMDK	FHNYTLDWAMDK[937]	2	b	1	10	12	CRH1-N177YT	0	FALSE	0	0.99	FALSE	1
962	1279.56	12	CRH1-N177YT		1	FHNYTLDWAMDK	FHNYTLDWAMDK[962]	2	b	1	10	12	CRH1-N177YT	0	FALSE	0	0.99	FALSE	1
987	1279.56	12	CRH1-N177YT		1	FHNYTLDWAMDK	FHNYTLDWAMDK[987]	2	b	1	10	12	CRH1-N177YT	0	FALSE	0	0.99	FALSE	1
1012	1279.56	12	CRH1-N177YT		1	FHNYTLDWAMDK	FHNYTLDWAMDK[1012]	2	b	1	10	12	CRH1-N177YT	0	FALSE	0	0.99	FALSE	1
1037	1279.56	12	CRH1-N177YT		1	FHNYTLDWAMDK	FHNYTLDWAMDK[1037]	2	b	1	10	12	CRH1-N177YT	0	FALSE	0	0.99	FALSE	1
1062	1279.56	12	CRH1-N177YT		1	FHNYTLDWAMDK	FHNYTLDWAMDK[1062]	2	b	1	10	12	CRH1-N177YT	0	FALSE	0	0.99	FALSE	1
[truncated: 13,675 more rows]

## Sheet: Supplementary Table S5_byY
Q1	Q3	RT_detected	protein_name	isotype	relative_intensity	stripped_sequence	modification_sequence	prec_z	frg_type	frg_z	frg_nr	iRT	uniprot_id	score	decoy	prec_y	confidence	shared	N	rank	mods	nterm	cterm
412.5	859.488	12	GAS3-N350VS		1	NVSLPTTK	N[412]VSLPTTK	2	Y	1	1	12	GAS3-N350VS	0	FALSE	0	0.99	FALSE	1
437	859.488	12	GAS3-N350VS		1	NVSLPTTK	N[437]VSLPTTK	2	Y	1	1	12	GAS3-N350VS	0	FALSE	0	0.99	FALSE	1
462	859.488	12	GAS3-N350VS		1	NVSLPTTK	N[462]VSLPTTK	2	Y	1	1	12	GAS3-N350VS	0	FALSE	0	0.99	FALSE	1
487	859.488	12	GAS3-N350VS		1	NVSLPTTK	N[487]VSLPTTK	2	Y	1	1	12	GAS3-N350VS	0	FALSE	0	0.99	FALSE	1
512	859.488	12	GAS3-N350VS		1	NVSLPTTK	N[512]VSLPTTK	2	Y	1	1	12	GAS3-N350VS	0	FALSE	0	0.99	FALSE	1
537	859.488	12	GAS3-N350VS		1	NVSLPTTK	N[537]VSLPTTK	2	Y	1	1	12	GAS3-N350VS	0	FALSE	0	0.99	FALSE	1
562	859.488	12	GAS3-N350VS		1	NVSLPTTK	N[562]VSLPTTK	2	Y	1	1	12	GAS3-N350VS	0	FALSE	0	0.99	FALSE	1
587	859.488	12	GAS3-N350VS		1	NVSLPTTK	N[587]VSLPTTK	2	Y	1	1	12	GAS3-N350VS	0	FALSE	0	0.99	FALSE	1
612	859.488	12	GAS3-N350VS		1	NVSLPTTK	N[612]VSLPTTK	2	Y	1	1	12	GAS3-N350VS	0	FALSE	0	0.99	FALSE	1
637	859.488	12	GAS3-N350VS		1	NVSLPTTK	N[637]VSLPTTK	2	Y	1	1	12	GAS3-N350VS	0	FALSE	0	0.99	FALSE	1
662	859.488	12	GAS3-N350VS		1	NVSLPTTK	N[662]VSLPTTK	2	Y	1	1	12	GAS3-N350VS	0	FALSE	0	0.99	FALSE	1
687	859.488	12	GAS3-N350VS		1	NVSLPTTK	N[687]VSLPTTK	2	Y	1	1	12	GAS3-N350VS	0	FALSE	0	0.99	FALSE	1
712	859.488	12	GAS3-N350VS		1	NVSLPTTK	N[712]VSLPTTK	2	Y	1	1	12	GAS3-N350VS	0	FALSE	0	0.99	FALSE	1
737	859.488	12	GAS3-N350VS		1	NVSLPTTK	N[737]VSLPTTK	2	Y	1	1	12	GAS3-N350VS	0	FALSE	0	0.99	FALSE	1
762	859.488	12	GAS3-N350VS		1	NVSLPTTK	N[762]VSLPTTK	2	Y	1	1	12	GAS3-N350VS	0	FALSE	0	0.99	FALSE	1
787	859.488	12	GAS3-N350VS		1	NVSLPTTK	N[787]VSLPTTK	2	Y	1	1	12	GAS3-N350VS	0	FALSE	0	0.99	FALSE	1
812	859.488	12	GAS3-N350VS		1	NVSLPTTK	N[812]VSLPTTK	2	Y	1	1	12	GAS3-N350VS	0	FALSE	0	0.99	FALSE	1
837	859.488	12	GAS3-N350VS		1	NVSLPTTK	N[837]VSLPTTK	2	Y	1	1	12	GAS3-N350VS	0	FALSE	0	0.99	FALSE	1
862	859.488	12	GAS3-N350VS		1	NVSLPTTK	N[862]VSLPTTK	2	Y	1	1	12	GAS3-N350VS	0	FALSE	0	0.99	FALSE	1
887	859.488	12	GAS3-N350VS		1	NVSLPTTK	N[887]VSLPTTK	2	Y	1	1	12	GAS3-N350VS	0	FALSE	0	0.99	FALSE	1
912	859.488	12	GAS3-N350VS		1	NVSLPTTK	N[912]VSLPTTK	2	Y	1	1	12	GAS3-N350VS	0	FALSE	0	0.99	FALSE	1
937	859.488	12	GAS3-N350VS		1	NVSLPTTK	N[937]VSLPTTK	2	Y	1	1	12	GAS3-N350VS	0	FALSE	0	0.99	FALSE	1
962	859.488	12	GAS3-N350VS		1	NVSLPTTK	N[962]VSLPTTK	2	Y	1	1	12	GAS3-N350VS	0	FALSE	0	0.99	FALSE	1
987	859.488	12	GAS3-N350VS		1	NVSLPTTK	N[987]VSLPTTK	2	Y	1	1	12	GAS3-N350VS	0	FALSE	0	0.99	FALSE	1
1012	859.488	12	GAS3-N350VS		1	NVSLPTTK	N[1012]VSLPTTK	2	Y	1	1	12	GAS3-N350VS	0	FALSE	0	0.99	FALSE	1
1037	859.488	12	GAS3-N350VS		1	NVSLPTTK	N[1037]VSLPTTK	2	Y	1	1	12	GAS3-N350VS	0	FALSE	0	0.99	FALSE	1
1062	859.488	12	GAS3-N350VS		1	NVSLPTTK	N[1062]VSLPTTK	2	Y	1	1	12	GAS3-N350VS	0	FALSE	0	0.99	FALSE	1
1087	859.488	12	GAS3-N350VS		1	NVSLPTTK	N[1087]VSLPTTK	2	Y	1	1	12	GAS3-N350VS	0	FALSE	0	0.99	FALSE	1
1112	859.488	12	GAS3-N350VS		1	NVSLPTTK	N[1112]VSLPTTK	2	Y	1	1	12	GAS3-N350VS	0	FALSE	0	0.99	FALSE	1
1137	859.488	12	GAS3-N350VS		1	NVSLPTTK	N[1137]VSLPTTK	2	Y	1	1	12	GAS3-N350VS	0	FALSE	0	0.99	FALSE	1
1162	859.488	12	GAS3-N350VS		1	NVSLPTTK	N[1162]VSLPTTK	2	Y	1	1	12	GAS3-N350VS	0	FALSE	0	0.99	FALSE	1
1187	859.488	12	GAS3-N350VS		1	NVSLPTTK	N[1187]VSLPTTK	2	Y	1	1	12	GAS3-N350VS	0	FALSE	0	0.99	FALSE	1
1212	859.488	12	GAS3-N350VS		1	NVSLPTTK	N[1212]VSLPTTK	2	Y	1	1	12	GAS3-N350VS	0	FALSE	0	0.99	FALSE	1
1237	859.488	12	GAS3-N350VS		1	NVSLPTTK	N[1237]VSLPTTK	2	Y	1	1	12	GAS3-N350VS	0	FALSE	0	0.99	FALSE	1
412.5	430.248	12	GAS3-N350VS		1	NVSLPTTK	N[412]VSLPTTK	2	Y	2	1	12	GAS3-N350VS	0	FALSE	0	0.99	FALSE	1
437	430.248	12	GAS3-N350VS		1	NVSLPTTK	N[437]VSLPTTK	2	Y	2	1	12	GAS3-N350VS	0	FALSE	0	0.99	FALSE	1
462	430.248	12	GAS3-N350VS		1	NVSLPTTK	N[462]VSLPTTK	2	Y	2	1	12	GAS3-N350VS	0	FALSE	0	0.99	FALSE	1
487	430.248	12	GAS3-N350VS		1	NVSLPTTK	N[487]VSLPTTK	2	Y	2	1	12	GAS3-N350VS	0	FALSE	0	0.99	FALSE	1
512	430.248	12	GAS3-N350VS		1	NVSLPTTK	N[512]VSLPTTK	2	Y	2	1	12	GAS3-N350VS	0	FALSE	0	0.99	FALSE	1
537	430.248	12	GAS3-N350VS		1	NVSLPTTK	N[537]VSLPTTK	2	Y	2	1	12	GAS3-N350VS	0	FALSE	0	0.99	FALSE	1
562	430.248	12	GAS3-N350VS		1	NVSLPTTK	N[562]VSLPTTK	2	Y	2	1	12	GAS3-N350VS	0	FALSE	0	0.99	FALSE	1
587	430.248	12	GAS3-N350VS		1	NVSLPTTK	N[587]VSLPTTK	2	Y	2	1	12	GAS3-N350VS	0	FALSE	0	0.99	FALSE	1
612	430.248	12	GAS3-N350VS		1	NVSLPTTK	N[612]VSLPTTK	2	Y	2	1	12	GAS3-N350VS	0	FALSE	0	0.99	FALSE	1
637	430.248	12	GAS3-N350VS		1	NVSLPTTK	N[637]VSLPTTK	2	Y	2	1	12	GAS3-N350VS	0	FALSE	0	0.99	FALSE	1
662	430.248	12	GAS3-N350VS		1	NVSLPTTK	N[662]VSLPTTK	2	Y	2	1	12	GAS3-N350VS	0	FALSE	0	0.99	FALSE	1
687	430.248	12	GAS3-N350VS		1	NVSLPTTK	N[687]VSLPTTK	2	Y	2	1	12	GAS3-N350VS	0	FALSE	0	0.99	FALSE	1
712	430.248	12	GAS3-N350VS		1	NVSLPTTK	N[712]VSLPTTK	2	Y	2	1	12	GAS3-N350VS	0	FALSE	0	0.99	FALSE	1
737	430.248	12	GAS3-N350VS		1	NVSLPTTK	N[737]VSLPTTK	2	Y	2	1	12	GAS3-N350VS	0	FALSE	0	0.99	FALSE	1
762	430.248	12	GAS3-N350VS		1	NVSLPTTK	N[762]VSLPTTK	2	Y	2	1	12	GAS3-N350VS	0	FALSE	0	0.99	FALSE	1
787	430.248	12	GAS3-N350VS		1	NVSLPTTK	N[787]VSLPTTK	2	Y	2	1	12	GAS3-N350VS	0	FALSE	0	0.99	FALSE	1
812	430.248	12	GAS3-N350VS		1	NVSLPTTK	N[812]VSLPTTK	2	Y	2	1	12	GAS3-N350VS	0	FALSE	0	0.99	FALSE	1
837	430.248	12	GAS3-N350VS		1	NVSLPTTK	N[837]VSLPTTK	2	Y	2	1	12	GAS3-N350VS	0	FALSE	0	0.99	FALSE	1
862	430.248	12	GAS3-N350VS		1	NVSLPTTK	N[862]VSLPTTK	2	Y	2	1	12	GAS3-N350VS	0	FALSE	0	0.99	FALSE	1
887	430.248	12	GAS3-N350VS		1	NVSLPTTK	N[887]VSLPTTK	2	Y	2	1	12	GAS3-N350VS	0	FALSE	0	0.99	FALSE	1
912	430.248	12	GAS3-N350VS		1	NVSLPTTK	N[912]VSLPTTK	2	Y	2	1	12	GAS3-N350VS	0	FALSE	0	0.99	FALSE	1
937	430.248	12	GAS3-N350VS		1	NVSLPTTK	N[937]VSLPTTK	2	Y	2	1	12	GAS3-N350VS	0	FALSE	0	0.99	FALSE	1
962	430.248	12	GAS3-N350VS		1	NVSLPTTK	N[962]VSLPTTK	2	Y	2	1	12	GAS3-N350VS	0	FALSE	0	0.99	FALSE	1
987	430.248	12	GAS3-N350VS		1	NVSLPTTK	N[987]VSLPTTK	2	Y	2	1	12	GAS3-N350VS	0	FALSE	0	0.99	FALSE	1
1012	430.248	12	GAS3-N350VS		1	NVSLPTTK	N[1012]VSLPTTK	2	Y	2	1	12	GAS3-N350VS	0	FALSE	0	0.99	FALSE	1
1037	430.248	12	GAS3-N350VS		1	NVSLPTTK	N[1037]VSLPTTK	2	Y	2	1	12	GAS3-N350VS	0	FALSE	0	0.99	FALSE	1
1062	430.248	12	GAS3-N350VS		1	NVSLPTTK	N[1062]VSLPTTK	2	Y	2	1	12	GAS3-N350VS	0	FALSE	0	0.99	FALSE	1
1087	430.248	12	GAS3-N350VS		1	NVSLPTTK	N[1087]VSLPTTK	2	Y	2	1	12	GAS3-N350VS	0	FALSE	0	0.99	FALSE	1
1112	430.248	12	GAS3-N350VS		1	NVSLPTTK	N[1112]VSLPTTK	2	Y	2	1	12	GAS3-N350VS	0	FALSE	0	0.99	FALSE	1
1137	430.248	12	GAS3-N350VS		1	NVSLPTTK	N[1137]VSLPTTK	2	Y	2	1	12	GAS3-N350VS	0	FALSE	0	0.99	FALSE	1
1162	430.248	12	GAS3-N350VS		1	NVSLPTTK	N[1162]VSLPTTK	2	Y	2	1	12	GAS3-N350VS	0	FALSE	0	0.99	FALSE	1
1187	430.248	12	GAS3-N350VS		1	NVSLPTTK	N[1187]VSLPTTK	2	Y	2	1	12	GAS3-N350VS	0	FALSE	0	0.99	FALSE	1
1212	430.248	12	GAS3-N350VS		1	NVSLPTTK	N[1212]VSLPTTK	2	Y	2	1	12	GAS3-N350VS	0	FALSE	0	0.99	FALSE	1
1237	430.248	12	GAS3-N350VS		1	NVSLPTTK	N[1237]VSLPTTK	2	Y	2	1	12	GAS3-N350VS	0	FALSE	0	0.99	FALSE	1
412.5	214.119	12	GAS3-N350VS		1	NVSLPTTK	N[412]VSLPTTK	2	b	1	2	12	GAS3-N350VS	0	FALSE	0	0.99	FALSE	1
437	214.119	12	GAS3-N350VS		1	NVSLPTTK	N[437]VSLPTTK	2	b	1	2	12	GAS3-N350VS	0	FALSE	0	0.99	FALSE	1
462	214.119	12	GAS3-N350VS		1	NVSLPTTK	N[462]VSLPTTK	2	b	1	2	12	GAS3-N350VS	0	FALSE	0	0.99	FALSE	1
487	214.119	12	GAS3-N350VS		1	NVSLPTTK	N[487]VSLPTTK	2	b	1	2	12	GAS3-N350VS	0	FALSE	0	0.99	FALSE	1
512	214.119	12	GAS3-N350VS		1	NVSLPTTK	N[512]VSLPTTK	2	b	1	2	12	GAS3-N350VS	0	FALSE	0	0.99	FALSE	1
537	214.119	12	GAS3-N350VS		1	NVSLPTTK	N[537]VSLPTTK	2	b	1	2	12	GAS3-N350VS	0	FALSE	0	0.99	FALSE	1
562	214.119	12	GAS3-N350VS		1	NVSLPTTK	N[562]VSLPTTK	2	b	1	2	12	GAS3-N350VS	0	FALSE	0	0.99	FALSE	1
587	214.119	12	GAS3-N350VS		1	NVSLPTTK	N[587]VSLPTTK	2	b	1	2	12	GAS3-N350VS	0	FALSE	0	0.99	FALSE	1
612	214.119	12	GAS3-N350VS		1	NVSLPTTK	N[612]VSLPTTK	2	b	1	2	12	GAS3-N350VS	0	FALSE	0	0.99	FALSE	1
637	214.119	12	GAS3-N350VS		1	NVSLPTTK	N[637]VSLPTTK	2	b	1	2	12	GAS3-N350VS	0	FALSE	0	0.99	FALSE	1
662	214.119	12	GAS3-N350VS		1	NVSLPTTK	N[662]VSLPTTK	2	b	1	2	12	GAS3-N350VS	0	FALSE	0	0.99	FALSE	1
687	214.119	12	GAS3-N350VS		1	NVSLPTTK	N[687]VSLPTTK	2	b	1	2	12	GAS3-N350VS	0	FALSE	0	0.99	FALSE	1
712	214.119	12	GAS3-N350VS		1	NVSLPTTK	N[712]VSLPTTK	2	b	1	2	12	GAS3-N350VS	0	FALSE	0	0.99	FALSE	1
737	214.119	12	GAS3-N350VS		1	NVSLPTTK	N[737]VSLPTTK	2	b	1	2	12	GAS3-N350VS	0	FALSE	0	0.99	FALSE	1
762	214.119	12	GAS3-N350VS		1	NVSLPTTK	N[762]VSLPTTK	2	b	1	2	12	GAS3-N350VS	0	FALSE	0	0.99	FALSE	1
787	214.119	12	GAS3-N350VS		1	NVSLPTTK	N[787]VSLPTTK	2	b	1	2	12	GAS3-N350VS	0	FALSE	0	0.99	FALSE	1
812	214.119	12	GAS3-N350VS		1	NVSLPTTK	N[812]VSLPTTK	2	b	1	2	12	GAS3-N350VS	0	FALSE	0	0.99	FALSE	1
837	214.119	12	GAS3-N350VS		1	NVSLPTTK	N[837]VSLPTTK	2	b	1	2	12	GAS3-N350VS	0	FALSE	0	0.99	FALSE	1
862	214.119	12	GAS3-N350VS		1	NVSLPTTK	N[862]VSLPTTK	2	b	1	2	12	GAS3-N350VS	0	FALSE	0	0.99	FALSE	1
887	214.119	12	GAS3-N350VS		1	NVSLPTTK	N[887]VSLPTTK	2	b	1	2	12	GAS3-N350VS	0	FALSE	0	0.99	FALSE	1
912	214.119	12	GAS3-N350VS		1	NVSLPTTK	N[912]VSLPTTK	2	b	1	2	12	GAS3-N350VS	0	FALSE	0	0.99	FALSE	1
937	214.119	12	GAS3-N350VS		1	NVSLPTTK	N[937]VSLPTTK	2	b	1	2	12	GAS3-N350VS	0	FALSE	0	0.99	FALSE	1
962	214.119	12	GAS3-N350VS		1	NVSLPTTK	N[962]VSLPTTK	2	b	1	2	12	GAS3-N350VS	0	FALSE	0	0.99	FALSE	1
987	214.119	12	GAS3-N350VS		1	NVSLPTTK	N[987]VSLPTTK	2	b	1	2	12	GAS3-N350VS	0	FALSE	0	0.99	FALSE	1
1012	214.119	12	GAS3-N350VS		1	NVSLPTTK	N[1012]VSLPTTK	2	b	1	2	12	GAS3-N350VS	0	FALSE	0	0.99	FALSE	1
1037	214.119	12	GAS3-N350VS		1	NVSLPTTK	N[1037]VSLPTTK	2	b	1	2	12	GAS3-N350VS	0	FALSE	0	0.99	FALSE	1
1062	214.119	12	GAS3-N350VS		1	NVSLPTTK	N[1062]VSLPTTK	2	b	1	2	12	GAS3-N350VS	0	FALSE	0	0.99	FALSE	1
1087	214.119	12	GAS3-N350VS		1	NVSLPTTK	N[1087]VSLPTTK	2	b	1	2	12	GAS3-N350VS	0	FALSE	0	0.99	FALSE	1
1112	214.119	12	GAS3-N350VS		1	NVSLPTTK	N[1112]VSLPTTK	2	b	1	2	12	GAS3-N350VS	0	FALSE	0	0.99	FALSE	1
1137	214.119	12	GAS3-N350VS		1	NVSLPTTK	N[1137]VSLPTTK	2	b	1	2	12	GAS3-N350VS	0	FALSE	0	0.99	FALSE	1
1162	214.119	12	GAS3-N350VS		1	NVSLPTTK	N[1162]VSLPTTK	2	b	1	2	12	GAS3-N350VS	0	FALSE	0	0.99	FALSE	1
1187	214.119	12	GAS3-N350VS		1	NVSLPTTK	N[1187]VSLPTTK	2	b	1	2	12	GAS3-N350VS	0	FALSE	0	0.99	FALSE	1
1212	214.119	12	GAS3-N350VS		1	NVSLPTTK	N[1212]VSLPTTK	2	b	1	2	12	GAS3-N350VS	0	FALSE	0	0.99	FALSE	1
1237	214.119	12	GAS3-N350VS		1	NVSLPTTK	N[1237]VSLPTTK	2	b	1	2	12	GAS3-N350VS	0	FALSE	0	0.99	FALSE	1
412.5	248.161	12	GAS3-N350VS		1	NVSLPTTK	N[412]VSLPTTK	2	y	1	2	12	GAS3-N350VS	0	FALSE	0	0.99	FALSE	1
437	248.161	12	GAS3-N350VS		1	NVSLPTTK	N[437]VSLPTTK	2	y	1	2	12	GAS3-N350VS	0	FALSE	0	0.99	FALSE	1
462	248.161	12	GAS3-N350VS		1	NVSLPTTK	N[462]VSLPTTK	2	y	1	2	12	GAS3-N350VS	0	FALSE	0	0.99	FALSE	1
487	248.161	12	GAS3-N350VS		1	NVSLPTTK	N[487]VSLPTTK	2	y	1	2	12	GAS3-N350VS	0	FALSE	0	0.99	FALSE	1
512	248.161	12	GAS3-N350VS		1	NVSLPTTK	N[512]VSLPTTK	2	y	1	2	12	GAS3-N350VS	0	FALSE	0	0.99	FALSE	1
537	248.161	12	GAS3-N350VS		1	NVSLPTTK	N[537]VSLPTTK	2	y	1	2	12	GAS3-N350VS	0	FALSE	0	0.99	FALSE	1
562	248.161	12	GAS3-N350VS		1	NVSLPTTK	N[562]VSLPTTK	2	y	1	2	12	GAS3-N350VS	0	FALSE	0	0.99	FALSE	1
587	248.161	12	GAS3-N350VS		1	NVSLPTTK	N[587]VSLPTTK	2	y	1	2	12	GAS3-N350VS	0	FALSE	0	0.99	FALSE	1
612	248.161	12	GAS3-N350VS		1	NVSLPTTK	N[612]VSLPTTK	2	y	1	2	12	GAS3-N350VS	0	FALSE	0	0.99	FALSE	1
637	248.161	12	GAS3-N350VS		1	NVSLPTTK	N[637]VSLPTTK	2	y	1	2	12	GAS3-N350VS	0	FALSE	0	0.99	FALSE	1
662	248.161	12	GAS3-N350VS		1	NVSLPTTK	N[662]VSLPTTK	2	y	1	2	12	GAS3-N350VS	0	FALSE	0	0.99	FALSE	1
687	248.161	12	GAS3-N350VS		1	NVSLPTTK	N[687]VSLPTTK	2	y	1	2	12	GAS3-N350VS	0	FALSE	0	0.99	FALSE	1
712	248.161	12	GAS3-N350VS		1	NVSLPTTK	N[712]VSLPTTK	2	y	1	2	12	GAS3-N350VS	0	FALSE	0	0.99	FALSE	1
737	248.161	12	GAS3-N350VS		1	NVSLPTTK	N[737]VSLPTTK	2	y	1	2	12	GAS3-N350VS	0	FALSE	0	0.99	FALSE	1
762	248.161	12	GAS3-N350VS		1	NVSLPTTK	N[762]VSLPTTK	2	y	1	2	12	GAS3-N350VS	0	FALSE	0	0.99	FALSE	1
787	248.161	12	GAS3-N350VS		1	NVSLPTTK	N[787]VSLPTTK	2	y	1	2	12	GAS3-N350VS	0	FALSE	0	0.99	FALSE	1
812	248.161	12	GAS3-N350VS		1	NVSLPTTK	N[812]VSLPTTK	2	y	1	2	12	GAS3-N350VS	0	FALSE	0	0.99	FALSE	1
837	248.161	12	GAS3-N350VS		1	NVSLPTTK	N[837]VSLPTTK	2	y	1	2	12	GAS3-N350VS	0	FALSE	0	0.99	FALSE	1
862	248.161	12	GAS3-N350VS		1	NVSLPTTK	N[862]VSLPTTK	2	y	1	2	12	GAS3-N350VS	0	FALSE	0	0.99	FALSE	1
887	248.161	12	GAS3-N350VS		1	NVSLPTTK	N[887]VSLPTTK	2	y	1	2	12	GAS3-N350VS	0	FALSE	0	0.99	FALSE	1
912	248.161	12	GAS3-N350VS		1	NVSLPTTK	N[912]VSLPTTK	2	y	1	2	12	GAS3-N350VS	0	FALSE	0	0.99	FALSE	1
937	248.161	12	GAS3-N350VS		1	NVSLPTTK	N[937]VSLPTTK	2	y	1	2	12	GAS3-N350VS	0	FALSE	0	0.99	FALSE	1
962	248.161	12	GAS3-N350VS		1	NVSLPTTK	N[962]VSLPTTK	2	y	1	2	12	GAS3-N350VS	0	FALSE	0	0.99	FALSE	1
987	248.161	12	GAS3-N350VS		1	NVSLPTTK	N[987]VSLPTTK	2	y	1	2	12	GAS3-N350VS	0	FALSE	0	0.99	FALSE	1
1012	248.161	12	GAS3-N350VS		1	NVSLPTTK	N[1012]VSLPTTK	2	y	1	2	12	GAS3-N350VS	0	FALSE	0	0.99	FALSE	1
1037	248.161	12	GAS3-N350VS		1	NVSLPTTK	N[1037]VSLPTTK	2	y	1	2	12	GAS3-N350VS	0	FALSE	0	0.99	FALSE	1
1062	248.161	12	GAS3-N350VS		1	NVSLPTTK	N[1062]VSLPTTK	2	y	1	2	12	GAS3-N350VS	0	FALSE	0	0.99	FALSE	1
1087	248.161	12	GAS3-N350VS		1	NVSLPTTK	N[1087]VSLPTTK	2	y	1	2	12	GAS3-N350VS	0	FALSE	0	0.99	FALSE	1
1112	248.161	12	GAS3-N350VS		1	NVSLPTTK	N[1112]VSLPTTK	2	y	1	2	12	GAS3-N350VS	0	FALSE	0	0.99	FALSE	1
1137	248.161	12	GAS3-N350VS		1	NVSLPTTK	N[1137]VSLPTTK	2	y	1	2	12	GAS3-N350VS	0	FALSE	0	0.99	FALSE	1
1162	248.161	12	GAS3-N350VS		1	NVSLPTTK	N[1162]VSLPTTK	2	y	1	2	12	GAS3-N350VS	0	FALSE	0	0.99	FALSE	1
1187	248.161	12	GAS3-N350VS		1	NVSLPTTK	N[1187]VSLPTTK	2	y	1	2	12	GAS3-N350VS	0	FALSE	0	0.99	FALSE	1
1212	248.161	12	GAS3-N350VS		1	NVSLPTTK	N[1212]VSLPTTK	2	y	1	2	12	GAS3-N350VS	0	FALSE	0	0.99	FALSE	1
1237	248.161	12	GAS3-N350VS		1	NVSLPTTK	N[1237]VSLPTTK	2	y	1	2	12	GAS3-N350VS	0	FALSE	0	0.99	FALSE	1
412.5	107.563	12	GAS3-N350VS		1	NVSLPTTK	N[412]VSLPTTK	2	b	2	2	12	GAS3-N350VS	0	FALSE	0	0.99	FALSE	1
437	107.563	12	GAS3-N350VS		1	NVSLPTTK	N[437]VSLPTTK	2	b	2	2	12	GAS3-N350VS	0	FALSE	0	0.99	FALSE	1
462	107.563	12	GAS3-N350VS		1	NVSLPTTK	N[462]VSLPTTK	2	b	2	2	12	GAS3-N350VS	0	FALSE	0	0.99	FALSE	1
487	107.563	12	GAS3-N350VS		1	NVSLPTTK	N[487]VSLPTTK	2	b	2	2	12	GAS3-N350VS	0	FALSE	0	0.99	FALSE	1
512	107.563	12	GAS3-N350VS		1	NVSLPTTK	N[512]VSLPTTK	2	b	2	2	12	GAS3-N350VS	0	FALSE	0	0.99	FALSE	1
537	107.563	12	GAS3-N350VS		1	NVSLPTTK	N[537]VSLPTTK	2	b	2	2	12	GAS3-N350VS	0	FALSE	0	0.99	FALSE	1
562	107.563	12	GAS3-N350VS		1	NVSLPTTK	N[562]VSLPTTK	2	b	2	2	12	GAS3-N350VS	0	FALSE	0	0.99	FALSE	1
587	107.563	12	GAS3-N350VS		1	NVSLPTTK	N[587]VSLPTTK	2	b	2	2	12	GAS3-N350VS	0	FALSE	0	0.99	FALSE	1
612	107.563	12	GAS3-N350VS		1	NVSLPTTK	N[612]VSLPTTK	2	b	2	2	12	GAS3-N350VS	0	FALSE	0	0.99	FALSE	1
637	107.563	12	GAS3-N350VS		1	NVSLPTTK	N[637]VSLPTTK	2	b	2	2	12	GAS3-N350VS	0	FALSE	0	0.99	FALSE	1
662	107.563	12	GAS3-N350VS		1	NVSLPTTK	N[662]VSLPTTK	2	b	2	2	12	GAS3-N350VS	0	FALSE	0	0.99	FALSE	1
687	107.563	12	GAS3-N350VS		1	NVSLPTTK	N[687]VSLPTTK	2	b	2	2	12	GAS3-N350VS	0	FALSE	0	0.99	FALSE	1
712	107.563	12	GAS3-N350VS		1	NVSLPTTK	N[712]VSLPTTK	2	b	2	2	12	GAS3-N350VS	0	FALSE	0	0.99	FALSE	1
737	107.563	12	GAS3-N350VS		1	NVSLPTTK	N[737]VSLPTTK	2	b	2	2	12	GAS3-N350VS	0	FALSE	0	0.99	FALSE	1
762	107.563	12	GAS3-N350VS		1	NVSLPTTK	N[762]VSLPTTK	2	b	2	2	12	GAS3-N350VS	0	FALSE	0	0.99	FALSE	1
787	107.563	12	GAS3-N350VS		1	NVSLPTTK	N[787]VSLPTTK	2	b	2	2	12	GAS3-N350VS	0	FALSE	0	0.99	FALSE	1
812	107.563	12	GAS3-N350VS		1	NVSLPTTK	N[812]VSLPTTK	2	b	2	2	12	GAS3-N350VS	0	FALSE	0	0.99	FALSE	1
837	107.563	12	GAS3-N350VS		1	NVSLPTTK	N[837]VSLPTTK	2	b	2	2	12	GAS3-N350VS	0	FALSE	0	0.99	FALSE	1
862	107.563	12	GAS3-N350VS		1	NVSLPTTK	N[862]VSLPTTK	2	b	2	2	12	GAS3-N350VS	0	FALSE	0	0.99	FALSE	1
887	107.563	12	GAS3-N350VS		1	NVSLPTTK	N[887]VSLPTTK	2	b	2	2	12	GAS3-N350VS	0	FALSE	0	0.99	FALSE	1
912	107.563	12	GAS3-N350VS		1	NVSLPTTK	N[912]VSLPTTK	2	b	2	2	12	GAS3-N350VS	0	FALSE	0	0.99	FALSE	1
937	107.563	12	GAS3-N350VS		1	NVSLPTTK	N[937]VSLPTTK	2	b	2	2	12	GAS3-N350VS	0	FALSE	0	0.99	FALSE	1
962	107.563	12	GAS3-N350VS		1	NVSLPTTK	N[962]VSLPTTK	2	b	2	2	12	GAS3-N350VS	0	FALSE	0	0.99	FALSE	1
987	107.563	12	GAS3-N350VS		1	NVSLPTTK	N[987]VSLPTTK	2	b	2	2	12	GAS3-N350VS	0	FALSE	0	0.99	FALSE	1
1012	107.563	12	GAS3-N350VS		1	NVSLPTTK	N[1012]VSLPTTK	2	b	2	2	12	GAS3-N350VS	0	FALSE	0	0.99	FALSE	1
1037	107.563	12	GAS3-N350VS		1	NVSLPTTK	N[1037]VSLPTTK	2	b	2	2	12	GAS3-N350VS	0	FALSE	0	0.99	FALSE	1
1062	107.563	12	GAS3-N350VS		1	NVSLPTTK	N[1062]VSLPTTK	2	b	2	2	12	GAS3-N350VS	0	FALSE	0	0.99	FALSE	1
1087	107.563	12	GAS3-N350VS		1	NVSLPTTK	N[1087]VSLPTTK	2	b	2	2	12	GAS3-N350VS	0	FALSE	0	0.99	FALSE	1
1112	107.563	12	GAS3-N350VS		1	NVSLPTTK	N[1112]VSLPTTK	2	b	2	2	12	GAS3-N350VS	0	FALSE	0	0.99	FALSE	1
1137	107.563	12	GAS3-N350VS		1	NVSLPTTK	N[1137]VSLPTTK	2	b	2	2	12	GAS3-N350VS	0	FALSE	0	0.99	FALSE	1
1162	107.563	12	GAS3-N350VS		1	NVSLPTTK	N[1162]VSLPTTK	2	b	2	2	12	GAS3-N350VS	0	FALSE	0	0.99	FALSE	1
1187	107.563	12	GAS3-N350VS		1	NVSLPTTK	N[1187]VSLPTTK	2	b	2	2	12	GAS3-N350VS	0	FALSE	0	0.99	FALSE	1
1212	107.563	12	GAS3-N350VS		1	NVSLPTTK	N[1212]VSLPTTK	2	b	2	2	12	GAS3-N350VS	0	FALSE	0	0.99	FALSE	1
1237	107.563	12	GAS3-N350VS		1	NVSLPTTK	N[1237]VSLPTTK	2	b	2	2	12	GAS3-N350VS	0	FALSE	0	0.99	FALSE	1
412.5	124.584	12	GAS3-N350VS		1	NVSLPTTK	N[412]VSLPTTK	2	y	2	2	12	GAS3-N350VS	0	FALSE	0	0.99	FALSE	1
437	124.584	12	GAS3-N350VS		1	NVSLPTTK	N[437]VSLPTTK	2	y	2	2	12	GAS3-N350VS	0	FALSE	0	0.99	FALSE	1
462	124.584	12	GAS3-N350VS		1	NVSLPTTK	N[462]VSLPTTK	2	y	2	2	12	GAS3-N350VS	0	FALSE	0	0.99	FALSE	1
487	124.584	12	GAS3-N350VS		1	NVSLPTTK	N[487]VSLPTTK	2	y	2	2	12	GAS3-N350VS	0	FALSE	0	0.99	FALSE	1
512	124.584	12	GAS3-N350VS		1	NVSLPTTK	N[512]VSLPTTK	2	y	2	2	12	GAS3-N350VS	0	FALSE	0	0.99	FALSE	1
537	124.584	12	GAS3-N350VS		1	NVSLPTTK	N[537]VSLPTTK	2	y	2	2	12	GAS3-N350VS	0	FALSE	0	0.99	FALSE	1
562	124.584	12	GAS3-N350VS		1	NVSLPTTK	N[562]VSLPTTK	2	y	2	2	12	GAS3-N350VS	0	FALSE	0	0.99	FALSE	1
587	124.584	12	GAS3-N350VS		1	NVSLPTTK	N[587]VSLPTTK	2	y	2	2	12	GAS3-N350VS	0	FALSE	0	0.99	FALSE	1
612	124.584	12	GAS3-N350VS		1	NVSLPTTK	N[612]VSLPTTK	2	y	2	2	12	GAS3-N350VS	0	FALSE	0	0.99	FALSE	1
637	124.584	12	GAS3-N350VS		1	NVSLPTTK	N[637]VSLPTTK	2	y	2	2	12	GAS3-N350VS	0	FALSE	0	0.99	FALSE	1
662	124.584	12	GAS3-N350VS		1	NVSLPTTK	N[662]VSLPTTK	2	y	2	2	12	GAS3-N350VS	0	FALSE	0	0.99	FALSE	1
687	124.584	12	GAS3-N350VS		1	NVSLPTTK	N[687]VSLPTTK	2	y	2	2	12	GAS3-N350VS	0	FALSE	0	0.99	FALSE	1
712	124.584	12	GAS3-N350VS		1	NVSLPTTK	N[712]VSLPTTK	2	y	2	2	12	GAS3-N350VS	0	FALSE	0	0.99	FALSE	1
737	124.584	12	GAS3-N350VS		1	NVSLPTTK	N[737]VSLPTTK	2	y	2	2	12	GAS3-N350VS	0	FALSE	0	0.99	FALSE	1
762	124.584	12	GAS3-N350VS		1	NVSLPTTK	N[762]VSLPTTK	2	y	2	2	12	GAS3-N350VS	0	FALSE	0	0.99	FALSE	1
787	124.584	12	GAS3-N350VS		1	NVSLPTTK	N[787]VSLPTTK	2	y	2	2	12	GAS3-N350VS	0	FALSE	0	0.99	FALSE	1
812	124.584	12	GAS3-N350VS		1	NVSLPTTK	N[812]VSLPTTK	2	y	2	2	12	GAS3-N350VS	0	FALSE	0	0.99	FALSE	1
837	124.584	12	GAS3-N350VS		1	NVSLPTTK	N[837]VSLPTTK	2	y	2	2	12	GAS3-N350VS	0	FALSE	0	0.99	FALSE	1
862	124.584	12	GAS3-N350VS		1	NVSLPTTK	N[862]VSLPTTK	2	y	2	2	12	GAS3-N350VS	0	FALSE	0	0.99	FALSE	1
887	124.584	12	GAS3-N350VS		1	NVSLPTTK	N[887]VSLPTTK	2	y	2	2	12	GAS3-N350VS	0	FALSE	0	0.99	FALSE	1
912	124.584	12	GAS3-N350VS		1	NVSLPTTK	N[912]VSLPTTK	2	y	2	2	12	GAS3-N350VS	0	FALSE	0	0.99	FALSE	1
937	124.584	12	GAS3-N350VS		1	NVSLPTTK	N[937]VSLPTTK	2	y	2	2	12	GAS3-N350VS	0	FALSE	0	0.99	FALSE	1
962	124.584	12	GAS3-N350VS		1	NVSLPTTK	N[962]VSLPTTK	2	y	2	2	12	GAS3-N350VS	0	FALSE	0	0.99	FALSE	1
987	124.584	12	GAS3-N350VS		1	NVSLPTTK	N[987]VSLPTTK	2	y	2	2	12	GAS3-N350VS	0	FALSE	0	0.99	FALSE	1
1012	124.584	12	GAS3-N350VS		1	NVSLPTTK	N[1012]VSLPTTK	2	y	2	2	12	GAS3-N350VS	0	FALSE	0	0.99	FALSE	1
1037	124.584	12	GAS3-N350VS		1	NVSLPTTK	N[1037]VSLPTTK	2	y	2	2	12	GAS3-N350VS	0	FALSE	0	0.99	FALSE	1
1062	124.584	12	GAS3-N350VS		1	NVSLPTTK	N[1062]VSLPTTK	2	y	2	2	12	GAS3-N350VS	0	FALSE	0	0.99	FALSE	1
1087	124.584	12	GAS3-N350VS		1	NVSLPTTK	N[1087]VSLPTTK	2	y	2	2	12	GAS3-N350VS	0	FALSE	0	0.99	FALSE	1
1112	124.584	12	GAS3-N350VS		1	NVSLPTTK	N[1112]VSLPTTK	2	y	2	2	12	GAS3-N350VS	0	FALSE	0	0.99	FALSE	1
1137	124.584	12	GAS3-N350VS		1	NVSLPTTK	N[1137]VSLPTTK	2	y	2	2	12	GAS3-N350VS	0	FALSE	0	0.99	FALSE	1
1162	124.584	12	GAS3-N350VS		1	NVSLPTTK	N[1162]VSLPTTK	2	y	2	2	12	GAS3-N350VS	0	FALSE	0	0.99	FALSE	1
1187	124.584	12	GAS3-N350VS		1	NVSLPTTK	N[1187]VSLPTTK	2	y	2	2	12	GAS3-N350VS	0	FALSE	0	0.99	FALSE	1
1212	124.584	12	GAS3-N350VS		1	NVSLPTTK	N[1212]VSLPTTK	2	y	2	2	12	GAS3-N350VS	0	FALSE	0	0.99	FALSE	1
1237	124.584	12	GAS3-N350VS		1	NVSLPTTK	N[1237]VSLPTTK	2	y	2	2	12	GAS3-N350VS	0	FALSE	0	0.99	FALSE	1
412.5	301.151	12	GAS3-N350VS		1	NVSLPTTK	N[412]VSLPTTK	2	b	1	3	12	GAS3-N350VS	0	FALSE	0	0.99	FALSE	1
437	301.151	12	GAS3-N350VS		1	NVSLPTTK	N[437]VSLPTTK	2	b	1	3	12	GAS3-N350VS	0	FALSE	0	0.99	FALSE	1
462	301.151	12	GAS3-N350VS		1	NVSLPTTK	N[462]VSLPTTK	2	b	1	3	12	GAS3-N350VS	0	FALSE	0	0.99	FALSE	1
487	301.151	12	GAS3-N350VS		1	NVSLPTTK	N[487]VSLPTTK	2	b	1	3	12	GAS3-N350VS	0	FALSE	0	0.99	FALSE	1
512	301.151	12	GAS3-N350VS		1	NVSLPTTK	N[512]VSLPTTK	2	b	1	3	12	GAS3-N350VS	0	FALSE	0	0.99	FALSE	1
537	301.151	12	GAS3-N350VS		1	NVSLPTTK	N[537]VSLPTTK	2	b	1	3	12	GAS3-N350VS	0	FALSE	0	0.99	FALSE	1
562	301.151	12	GAS3-N350VS		1	NVSLPTTK	N[562]VSLPTTK	2	b	1	3	12	GAS3-N350VS	0	FALSE	0	0.99	FALSE	1
587	301.151	12	GAS3-N350VS		1	NVSLPTTK	N[587]VSLPTTK	2	b	1	3	12	GAS3-N350VS	0	FALSE	0	0.99	FALSE	1
612	301.151	12	GAS3-N350VS		1	NVSLPTTK	N[612]VSLPTTK	2	b	1	3	12	GAS3-N350VS	0	FALSE	0	0.99	FALSE	1
637	301.151	12	GAS3-N350VS		1	NVSLPTTK	N[637]VSLPTTK	2	b	1	3	12	GAS3-N350VS	0	FALSE	0	0.99	FALSE	1
662	301.151	12	GAS3-N350VS		1	NVSLPTTK	N[662]VSLPTTK	2	b	1	3	12	GAS3-N350VS	0	FALSE	0	0.99	FALSE	1
687	301.151	12	GAS3-N350VS		1	NVSLPTTK	N[687]VSLPTTK	2	b	1	3	12	GAS3-N350VS	0	FALSE	0	0.99	FALSE	1
712	301.151	12	GAS3-N350VS		1	NVSLPTTK	N[712]VSLPTTK	2	b	1	3	12	GAS3-N350VS	0	FALSE	0	0.99	FALSE	1
737	301.151	12	GAS3-N350VS		1	NVSLPTTK	N[737]VSLPTTK	2	b	1	3	12	GAS3-N350VS	0	FALSE	0	0.99	FALSE	1
762	301.151	12	GAS3-N350VS		1	NVSLPTTK	N[762]VSLPTTK	2	b	1	3	12	GAS3-N350VS	0	FALSE	0	0.99	FALSE	1
787	301.151	12	GAS3-N350VS		1	NVSLPTTK	N[787]VSLPTTK	2	b	1	3	12	GAS3-N350VS	0	FALSE	0	0.99	FALSE	1
812	301.151	12	GAS3-N350VS		1	NVSLPTTK	N[812]VSLPTTK	2	b	1	3	12	GAS3-N350VS	0	FALSE	0	0.99	FALSE	1
837	301.151	12	GAS3-N350VS		1	NVSLPTTK	N[837]VSLPTTK	2	b	1	3	12	GAS3-N350VS	0	FALSE	0	0.99	FALSE	1
862	301.151	12	GAS3-N350VS		1	NVSLPTTK	N[862]VSLPTTK	2	b	1	3	12	GAS3-N350VS	0	FALSE	0	0.99	FALSE	1
887	301.151	12	GAS3-N350VS		1	NVSLPTTK	N[887]VSLPTTK	2	b	1	3	12	GAS3-N350VS	0	FALSE	0	0.99	FALSE	1
912	301.151	12	GAS3-N350VS		1	NVSLPTTK	N[912]VSLPTTK	2	b	1	3	12	GAS3-N350VS	0	FALSE	0	0.99	FALSE	1
937	301.151	12	GAS3-N350VS		1	NVSLPTTK	N[937]VSLPTTK	2	b	1	3	12	GAS3-N350VS	0	FALSE	0	0.99	FALSE	1
962	301.151	12	GAS3-N350VS		1	NVSLPTTK	N[962]VSLPTTK	2	b	1	3	12	GAS3-N350VS	0	FALSE	0	0.99	FALSE	1
987	301.151	12	GAS3-N350VS		1	NVSLPTTK	N[987]VSLPTTK	2	b	1	3	12	GAS3-N350VS	0	FALSE	0	0.99	FALSE	1
1012	301.151	12	GAS3-N350VS		1	NVSLPTTK	N[1012]VSLPTTK	2	b	1	3	12	GAS3-N350VS	0	FALSE	0	0.99	FALSE	1
1037	301.151	12	GAS3-N350VS		1	NVSLPTTK	N[1037]VSLPTTK	2	b	1	3	12	GAS3-N350VS	0	FALSE	0	0.99	FALSE	1
1062	301.151	12	GAS3-N350VS		1	NVSLPTTK	N[1062]VSLPTTK	2	b	1	3	12	GAS3-N350VS	0	FALSE	0	0.99	FALSE	1
1087	301.151	12	GAS3-N350VS		1	NVSLPTTK	N[1087]VSLPTTK	2	b	1	3	12	GAS3-N350VS	0	FALSE	0	0.99	FALSE	1
1112	301.151	12	GAS3-N350VS		1	NVSLPTTK	N[1112]VSLPTTK	2	b	1	3	12	GAS3-N350VS	0	FALSE	0	0.99	FALSE	1
1137	301.151	12	GAS3-N350VS		1	NVSLPTTK	N[1137]VSLPTTK	2	b	1	3	12	GAS3-N350VS	0	FALSE	0	0.99	FALSE	1
1162	301.151	12	GAS3-N350VS		1	NVSLPTTK	N[1162]VSLPTTK	2	b	1	3	12	GAS3-N350VS	0	FALSE	0	0.99	FALSE	1
1187	301.151	12	GAS3-N350VS		1	NVSLPTTK	N[1187]VSLPTTK	2	b	1	3	12	GAS3-N350VS	0	FALSE	0	0.99	FALSE	1
1212	301.151	12	GAS3-N350VS		1	NVSLPTTK	N[1212]VSLPTTK	2	b	1	3	12	GAS3-N350VS	0	FALSE	0	0.99	FALSE	1
1237	301.151	12	GAS3-N350VS		1	NVSLPTTK	N[1237]VSLPTTK	2	b	1	3	12	GAS3-N350VS	0	FALSE	0	0.99	FALSE	1
412.5	349.208	12	GAS3-N350VS		1	NVSLPTTK	N[412]VSLPTTK	2	y	1	3	12	GAS3-N350VS	0	FALSE	0	0.99	FALSE	1
437	349.208	12	GAS3-N350VS		1	NVSLPTTK	N[437]VSLPTTK	2	y	1	3	12	GAS3-N350VS	0	FALSE	0	0.99	FALSE	1
462	349.208	12	GAS3-N350VS		1	NVSLPTTK	N[462]VSLPTTK	2	y	1	3	12	GAS3-N350VS	0	FALSE	0	0.99	FALSE	1
487	349.208	12	GAS3-N350VS		1	NVSLPTTK	N[487]VSLPTTK	2	y	1	3	12	GAS3-N350VS	0	FALSE	0	0.99	FALSE	1
512	349.208	12	GAS3-N350VS		1	NVSLPTTK	N[512]VSLPTTK	2	y	1	3	12	GAS3-N350VS	0	FALSE	0	0.99	FALSE	1
537	349.208	12	GAS3-N350VS		1	NVSLPTTK	N[537]VSLPTTK	2	y	1	3	12	GAS3-N350VS	0	FALSE	0	0.99	FALSE	1
562	349.208	12	GAS3-N350VS		1	NVSLPTTK	N[562]VSLPTTK	2	y	1	3	12	GAS3-N350VS	0	FALSE	0	0.99	FALSE	1
587	349.208	12	GAS3-N350VS		1	NVSLPTTK	N[587]VSLPTTK	2	y	1	3	12	GAS3-N350VS	0	FALSE	0	0.99	FALSE	1
612	349.208	12	GAS3-N350VS		1	NVSLPTTK	N[612]VSLPTTK	2	y	1	3	12	GAS3-N350VS	0	FALSE	0	0.99	FALSE	1
637	349.208	12	GAS3-N350VS		1	NVSLPTTK	N[637]VSLPTTK	2	y	1	3	12	GAS3-N350VS	0	FALSE	0	0.99	FALSE	1
662	349.208	12	GAS3-N350VS		1	NVSLPTTK	N[662]VSLPTTK	2	y	1	3	12	GAS3-N350VS	0	FALSE	0	0.99	FALSE	1
687	349.208	12	GAS3-N350VS		1	NVSLPTTK	N[687]VSLPTTK	2	y	1	3	12	GAS3-N350VS	0	FALSE	0	0.99	FALSE	1
712	349.208	12	GAS3-N350VS		1	NVSLPTTK	N[712]VSLPTTK	2	y	1	3	12	GAS3-N350VS	0	FALSE	0	0.99	FALSE	1
737	349.208	12	GAS3-N350VS		1	NVSLPTTK	N[737]VSLPTTK	2	y	1	3	12	GAS3-N350VS	0	FALSE	0	0.99	FALSE	1
762	349.208	12	GAS3-N350VS		1	NVSLPTTK	N[762]VSLPTTK	2	y	1	3	12	GAS3-N350VS	0	FALSE	0	0.99	FALSE	1
787	349.208	12	GAS3-N350VS		1	NVSLPTTK	N[787]VSLPTTK	2	y	1	3	12	GAS3-N350VS	0	FALSE	0	0.99	FALSE	1
812	349.208	12	GAS3-N350VS		1	NVSLPTTK	N[812]VSLPTTK	2	y	1	3	12	GAS3-N350VS	0	FALSE	0	0.99	FALSE	1
837	349.208	12	GAS3-N350VS		1	NVSLPTTK	N[837]VSLPTTK	2	y	1	3	12	GAS3-N350VS	0	FALSE	0	0.99	FALSE	1
862	349.208	12	GAS3-N350VS		1	NVSLPTTK	N[862]VSLPTTK	2	y	1	3	12	GAS3-N350VS	0	FALSE	0	0.99	FALSE	1
887	349.208	12	GAS3-N350VS		1	NVSLPTTK	N[887]VSLPTTK	2	y	1	3	12	GAS3-N350VS	0	FALSE	0	0.99	FALSE	1
912	349.208	12	GAS3-N350VS		1	NVSLPTTK	N[912]VSLPTTK	2	y	1	3	12	GAS3-N350VS	0	FALSE	0	0.99	FALSE	1
937	349.208	12	GAS3-N350VS		1	NVSLPTTK	N[937]VSLPTTK	2	y	1	3	12	GAS3-N350VS	0	FALSE	0	0.99	FALSE	1
962	349.208	12	GAS3-N350VS		1	NVSLPTTK	N[962]VSLPTTK	2	y	1	3	12	GAS3-N350VS	0	FALSE	0	0.99	FALSE	1
987	349.208	12	GAS3-N350VS		1	NVSLPTTK	N[987]VSLPTTK	2	y	1	3	12	GAS3-N350VS	0	FALSE	0	0.99	FALSE	1
1012	349.208	12	GAS3-N350VS		1	NVSLPTTK	N[1012]VSLPTTK	2	y	1	3	12	GAS3-N350VS	0	FALSE	0	0.99	FALSE	1
1037	349.208	12	GAS3-N350VS		1	NVSLPTTK	N[1037]VSLPTTK	2	y	1	3	12	GAS3-N350VS	0	FALSE	0	0.99	FALSE	1
1062	349.208	12	GAS3-N350VS		1	NVSLPTTK	N[1062]VSLPTTK	2	y	1	3	12	GAS3-N350VS	0	FALSE	0	0.99	FALSE	1
1087	349.208	12	GAS3-N350VS		1	NVSLPTTK	N[1087]VSLPTTK	2	y	1	3	12	GAS3-N350VS	0	FALSE	0	0.99	FALSE	1
1112	349.208	12	GAS3-N350VS		1	NVSLPTTK	N[1112]VSLPTTK	2	y	1	3	12	GAS3-N350VS	0	FALSE	0	0.99	FALSE	1
1137	349.208	12	GAS3-N350VS		1	NVSLPTTK	N[1137]VSLPTTK	2	y	1	3	12	GAS3-N350VS	0	FALSE	0	0.99	FALSE	1
1162	349.208	12	GAS3-N350VS		1	NVSLPTTK	N[1162]VSLPTTK	2	y	1	3	12	GAS3-N350VS	0	FALSE	0	0.99	FALSE	1
1187	349.208	12	GAS3-N350VS		1	NVSLPTTK	N[1187]VSLPTTK	2	y	1	3	12	GAS3-N350VS	0	FALSE	0	0.99	FALSE	1
1212	349.208	12	GAS3-N350VS		1	NVSLPTTK	N[1212]VSLPTTK	2	y	1	3	12	GAS3-N350VS	0	FALSE	0	0.99	FALSE	1
1237	349.208	12	GAS3-N350VS		1	NVSLPTTK	N[1237]VSLPTTK	2	y	1	3	12	GAS3-N350VS	0	FALSE	0	0.99	FALSE	1
412.5	151.079	12	GAS3-N350VS		1	NVSLPTTK	N[412]VSLPTTK	2	b	2	3	12	GAS3-N350VS	0	FALSE	0	0.99	FALSE	1
437	151.079	12	GAS3-N350VS		1	NVSLPTTK	N[437]VSLPTTK	2	b	2	3	12	GAS3-N350VS	0	FALSE	0	0.99	FALSE	1
462	151.079	12	GAS3-N350VS		1	NVSLPTTK	N[462]VSLPTTK	2	b	2	3	12	GAS3-N350VS	0	FALSE	0	0.99	FALSE	1
487	151.079	12	GAS3-N350VS		1	NVSLPTTK	N[487]VSLPTTK	2	b	2	3	12	GAS3-N350VS	0	FALSE	0	0.99	FALSE	1
512	151.079	12	GAS3-N350VS		1	NVSLPTTK	N[512]VSLPTTK	2	b	2	3	12	GAS3-N350VS	0	FALSE	0	0.99	FALSE	1
537	151.079	12	GAS3-N350VS		1	NVSLPTTK	N[537]VSLPTTK	2	b	2	3	12	GAS3-N350VS	0	FALSE	0	0.99	FALSE	1
562	151.079	12	GAS3-N350VS		1	NVSLPTTK	N[562]VSLPTTK	2	b	2	3	12	GAS3-N350VS	0	FALSE	0	0.99	FALSE	1
587	151.079	12	GAS3-N350VS		1	NVSLPTTK	N[587]VSLPTTK	2	b	2	3	12	GAS3-N350VS	0	FALSE	0	0.99	FALSE	1
612	151.079	12	GAS3-N350VS		1	NVSLPTTK	N[612]VSLPTTK	2	b	2	3	12	GAS3-N350VS	0	FALSE	0	0.99	FALSE	1
637	151.079	12	GAS3-N350VS		1	NVSLPTTK	N[637]VSLPTTK	2	b	2	3	12	GAS3-N350VS	0	FALSE	0	0.99	FALSE	1
662	151.079	12	GAS3-N350VS		1	NVSLPTTK	N[662]VSLPTTK	2	b	2	3	12	GAS3-N350VS	0	FALSE	0	0.99	FALSE	1
687	151.079	12	GAS3-N350VS		1	NVSLPTTK	N[687]VSLPTTK	2	b	2	3	12	GAS3-N350VS	0	FALSE	0	0.99	FALSE	1
712	151.079	12	GAS3-N350VS		1	NVSLPTTK	N[712]VSLPTTK	2	b	2	3	12	GAS3-N350VS	0	FALSE	0	0.99	FALSE	1
737	151.079	12	GAS3-N350VS		1	NVSLPTTK	N[737]VSLPTTK	2	b	2	3	12	GAS3-N350VS	0	FALSE	0	0.99	FALSE	1
762	151.079	12	GAS3-N350VS		1	NVSLPTTK	N[762]VSLPTTK	2	b	2	3	12	GAS3-N350VS	0	FALSE	0	0.99	FALSE	1
787	151.079	12	GAS3-N350VS		1	NVSLPTTK	N[787]VSLPTTK	2	b	2	3	12	GAS3-N350VS	0	FALSE	0	0.99	FALSE	1
812	151.079	12	GAS3-N350VS		1	NVSLPTTK	N[812]VSLPTTK	2	b	2	3	12	GAS3-N350VS	0	FALSE	0	0.99	FALSE	1
837	151.079	12	GAS3-N350VS		1	NVSLPTTK	N[837]VSLPTTK	2	b	2	3	12	GAS3-N350VS	0	FALSE	0	0.99	FALSE	1
862	151.079	12	GAS3-N350VS		1	NVSLPTTK	N[862]VSLPTTK	2	b	2	3	12	GAS3-N350VS	0	FALSE	0	0.99	FALSE	1
887	151.079	12	GAS3-N350VS		1	NVSLPTTK	N[887]VSLPTTK	2	b	2	3	12	GAS3-N350VS	0	FALSE	0	0.99	FALSE	1
912	151.079	12	GAS3-N350VS		1	NVSLPTTK	N[912]VSLPTTK	2	b	2	3	12	GAS3-N350VS	0	FALSE	0	0.99	FALSE	1
937	151.079	12	GAS3-N350VS		1	NVSLPTTK	N[937]VSLPTTK	2	b	2	3	12	GAS3-N350VS	0	FALSE	0	0.99	FALSE	1
962	151.079	12	GAS3-N350VS		1	NVSLPTTK	N[962]VSLPTTK	2	b	2	3	12	GAS3-N350VS	0	FALSE	0	0.99	FALSE	1
987	151.079	12	GAS3-N350VS		1	NVSLPTTK	N[987]VSLPTTK	2	b	2	3	12	GAS3-N350VS	0	FALSE	0	0.99	FALSE	1
1012	151.079	12	GAS3-N350VS		1	NVSLPTTK	N[1012]VSLPTTK	2	b	2	3	12	GAS3-N350VS	0	FALSE	0	0.99	FALSE	1
1037	151.079	12	GAS3-N350VS		1	NVSLPTTK	N[1037]VSLPTTK	2	b	2	3	12	GAS3-N350VS	0	FALSE	0	0.99	FALSE	1
1062	151.079	12	GAS3-N350VS		1	NVSLPTTK	N[1062]VSLPTTK	2	b	2	3	12	GAS3-N350VS	0	FALSE	0	0.99	FALSE	1
1087	151.079	12	GAS3-N350VS		1	NVSLPTTK	N[1087]VSLPTTK	2	b	2	3	12	GAS3-N350VS	0	FALSE	0	0.99	FALSE	1
1112	151.079	12	GAS3-N350VS		1	NVSLPTTK	N[1112]VSLPTTK	2	b	2	3	12	GAS3-N350VS	0	FALSE	0	0.99	FALSE	1
1137	151.079	12	GAS3-N350VS		1	NVSLPTTK	N[1137]VSLPTTK	2	b	2	3	12	GAS3-N350VS	0	FALSE	0	0.99	FALSE	1
1162	151.079	12	GAS3-N350VS		1	NVSLPTTK	N[1162]VSLPTTK	2	b	2	3	12	GAS3-N350VS	0	FALSE	0	0.99	FALSE	1
1187	151.079	12	GAS3-N350VS		1	NVSLPTTK	N[1187]VSLPTTK	2	b	2	3	12	GAS3-N350VS	0	FALSE	0	0.99	FALSE	1
1212	151.079	12	GAS3-N350VS		1	NVSLPTTK	N[1212]VSLPTTK	2	b	2	3	12	GAS3-N350VS	0	FALSE	0	0.99	FALSE	1
1237	151.079	12	GAS3-N350VS		1	NVSLPTTK	N[1237]VSLPTTK	2	b	2	3	12	GAS3-N350VS	0	FALSE	0	0.99	FALSE	1
412.5	175.108	12	GAS3-N350VS		1	NVSLPTTK	N[412]VSLPTTK	2	y	2	3	12	GAS3-N350VS	0	FALSE	0	0.99	FALSE	1
437	175.108	12	GAS3-N350VS		1	NVSLPTTK	N[437]VSLPTTK	2	y	2	3	12	GAS3-N350VS	0	FALSE	0	0.99	FALSE	1
462	175.108	12	GAS3-N350VS		1	NVSLPTTK	N[462]VSLPTTK	2	y	2	3	12	GAS3-N350VS	0	FALSE	0	0.99	FALSE	1
487	175.108	12	GAS3-N350VS		1	NVSLPTTK	N[487]VSLPTTK	2	y	2	3	12	GAS3-N350VS	0	FALSE	0	0.99	FALSE	1
512	175.108	12	GAS3-N350VS		1	NVSLPTTK	N[512]VSLPTTK	2	y	2	3	12	GAS3-N350VS	0	FALSE	0	0.99	FALSE	1
537	175.108	12	GAS3-N350VS		1	NVSLPTTK	N[537]VSLPTTK	2	y	2	3	12	GAS3-N350VS	0	FALSE	0	0.99	FALSE	1
562	175.108	12	GAS3-N350VS		1	NVSLPTTK	N[562]VSLPTTK	2	y	2	3	12	GAS3-N350VS	0	FALSE	0	0.99	FALSE	1
587	175.108	12	GAS3-N350VS		1	NVSLPTTK	N[587]VSLPTTK	2	y	2	3	12	GAS3-N350VS	0	FALSE	0	0.99	FALSE	1
612	175.108	12	GAS3-N350VS		1	NVSLPTTK	N[612]VSLPTTK	2	y	2	3	12	GAS3-N350VS	0	FALSE	0	0.99	FALSE	1
637	175.108	12	GAS3-N350VS		1	NVSLPTTK	N[637]VSLPTTK	2	y	2	3	12	GAS3-N350VS	0	FALSE	0	0.99	FALSE	1
662	175.108	12	GAS3-N350VS		1	NVSLPTTK	N[662]VSLPTTK	2	y	2	3	12	GAS3-N350VS	0	FALSE	0	0.99	FALSE	1
687	175.108	12	GAS3-N350VS		1	NVSLPTTK	N[687]VSLPTTK	2	y	2	3	12	GAS3-N350VS	0	FALSE	0	0.99	FALSE	1
712	175.108	12	GAS3-N350VS		1	NVSLPTTK	N[712]VSLPTTK	2	y	2	3	12	GAS3-N350VS	0	FALSE	0	0.99	FALSE	1
737	175.108	12	GAS3-N350VS		1	NVSLPTTK	N[737]VSLPTTK	2	y	2	3	12	GAS3-N350VS	0	FALSE	0	0.99	FALSE	1
762	175.108	12	GAS3-N350VS		1	NVSLPTTK	N[762]VSLPTTK	2	y	2	3	12	GAS3-N350VS	0	FALSE	0	0.99	FALSE	1
787	175.108	12	GAS3-N350VS		1	NVSLPTTK	N[787]VSLPTTK	2	y	2	3	12	GAS3-N350VS	0	FALSE	0	0.99	FALSE	1
812	175.108	12	GAS3-N350VS		1	NVSLPTTK	N[812]VSLPTTK	2	y	2	3	12	GAS3-N350VS	0	FALSE	0	0.99	FALSE	1
837	175.108	12	GAS3-N350VS		1	NVSLPTTK	N[837]VSLPTTK	2	y	2	3	12	GAS3-N350VS	0	FALSE	0	0.99	FALSE	1
862	175.108	12	GAS3-N350VS		1	NVSLPTTK	N[862]VSLPTTK	2	y	2	3	12	GAS3-N350VS	0	FALSE	0	0.99	FALSE	1
887	175.108	12	GAS3-N350VS		1	NVSLPTTK	N[887]VSLPTTK	2	y	2	3	12	GAS3-N350VS	0	FALSE	0	0.99	FALSE	1
912	175.108	12	GAS3-N350VS		1	NVSLPTTK	N[912]VSLPTTK	2	y	2	3	12	GAS3-N350VS	0	FALSE	0	0.99	FALSE	1
937	175.108	12	GAS3-N350VS		1	NVSLPTTK	N[937]VSLPTTK	2	y	2	3	12	GAS3-N350VS	0	FALSE	0	0.99	FALSE	1
962	175.108	12	GAS3-N350VS		1	NVSLPTTK	N[962]VSLPTTK	2	y	2	3	12	GAS3-N350VS	0	FALSE	0	0.99	FALSE	1
987	175.108	12	GAS3-N350VS		1	NVSLPTTK	N[987]VSLPTTK	2	y	2	3	12	GAS3-N350VS	0	FALSE	0	0.99	FALSE	1
1012	175.108	12	GAS3-N350VS		1	NVSLPTTK	N[1012]VSLPTTK	2	y	2	3	12	GAS3-N350VS	0	FALSE	0	0.99	FALSE	1
1037	175.108	12	GAS3-N350VS		1	NVSLPTTK	N[1037]VSLPTTK	2	y	2	3	12	GAS3-N350VS	0	FALSE	0	0.99	FALSE	1
1062	175.108	12	GAS3-N350VS		1	NVSLPTTK	N[1062]VSLPTTK	2	y	2	3	12	GAS3-N350VS	0	FALSE	0	0.99	FALSE	1
1087	175.108	12	GAS3-N350VS		1	NVSLPTTK	N[1087]VSLPTTK	2	y	2	3	12	GAS3-N350VS	0	FALSE	0	0.99	FALSE	1
1112	175.108	12	GAS3-N350VS		1	NVSLPTTK	N[1112]VSLPTTK	2	y	2	3	12	GAS3-N350VS	0	FALSE	0	0.99	FALSE	1
1137	175.108	12	GAS3-N350VS		1	NVSLPTTK	N[1137]VSLPTTK	2	y	2	3	12	GAS3-N350VS	0	FALSE	0	0.99	FALSE	1
1162	175.108	12	GAS3-N350VS		1	NVSLPTTK	N[1162]VSLPTTK	2	y	2	3	12	GAS3-N350VS	0	FALSE	0	0.99	FALSE	1
1187	175.108	12	GAS3-N350VS		1	NVSLPTTK	N[1187]VSLPTTK	2	y	2	3	12	GAS3-N350VS	0	FALSE	0	0.99	FALSE	1
1212	175.108	12	GAS3-N350VS		1	NVSLPTTK	N[1212]VSLPTTK	2	y	2	3	12	GAS3-N350VS	0	FALSE	0	0.99	FALSE	1
1237	175.108	12	GAS3-N350VS		1	NVSLPTTK	N[1237]VSLPTTK	2	y	2	3	12	GAS3-N350VS	0	FALSE	0	0.99	FALSE	1
412.5	414.235	12	GAS3-N350VS		1	NVSLPTTK	N[412]VSLPTTK	2	b	1	4	12	GAS3-N350VS	0	FALSE	0	0.99	FALSE	1
437	414.235	12	GAS3-N350VS		1	NVSLPTTK	N[437]VSLPTTK	2	b	1	4	12	GAS3-N350VS	0	FALSE	0	0.99	FALSE	1
462	414.235	12	GAS3-N350VS		1	NVSLPTTK	N[462]VSLPTTK	2	b	1	4	12	GAS3-N350VS	0	FALSE	0	0.99	FALSE	1
487	414.235	12	GAS3-N350VS		1	NVSLPTTK	N[487]VSLPTTK	2	b	1	4	12	GAS3-N350VS	0	FALSE	0	0.99	FALSE	1
512	414.235	12	GAS3-N350VS		1	NVSLPTTK	N[512]VSLPTTK	2	b	1	4	12	GAS3-N350VS	0	FALSE	0	0.99	FALSE	1
537	414.235	12	GAS3-N350VS		1	NVSLPTTK	N[537]VSLPTTK	2	b	1	4	12	GAS3-N350VS	0	FALSE	0	0.99	FALSE	1
562	414.235	12	GAS3-N350VS		1	NVSLPTTK	N[562]VSLPTTK	2	b	1	4	12	GAS3-N350VS	0	FALSE	0	0.99	FALSE	1
587	414.235	12	GAS3-N350VS		1	NVSLPTTK	N[587]VSLPTTK	2	b	1	4	12	GAS3-N350VS	0	FALSE	0	0.99	FALSE	1
612	414.235	12	GAS3-N350VS		1	NVSLPTTK	N[612]VSLPTTK	2	b	1	4	12	GAS3-N350VS	0	FALSE	0	0.99	FALSE	1
637	414.235	12	GAS3-N350VS		1	NVSLPTTK	N[637]VSLPTTK	2	b	1	4	12	GAS3-N350VS	0	FALSE	0	0.99	FALSE	1
662	414.235	12	GAS3-N350VS		1	NVSLPTTK	N[662]VSLPTTK	2	b	1	4	12	GAS3-N350VS	0	FALSE	0	0.99	FALSE	1
687	414.235	12	GAS3-N350VS		1	NVSLPTTK	N[687]VSLPTTK	2	b	1	4	12	GAS3-N350VS	0	FALSE	0	0.99	FALSE	1
712	414.235	12	GAS3-N350VS		1	NVSLPTTK	N[712]VSLPTTK	2	b	1	4	12	GAS3-N350VS	0	FALSE	0	0.99	FALSE	1
737	414.235	12	GAS3-N350VS		1	NVSLPTTK	N[737]VSLPTTK	2	b	1	4	12	GAS3-N350VS	0	FALSE	0	0.99	FALSE	1
762	414.235	12	GAS3-N350VS		1	NVSLPTTK	N[762]VSLPTTK	2	b	1	4	12	GAS3-N350VS	0	FALSE	0	0.99	FALSE	1
787	414.235	12	GAS3-N350VS		1	NVSLPTTK	N[787]VSLPTTK	2	b	1	4	12	GAS3-N350VS	0	FALSE	0	0.99	FALSE	1
812	414.235	12	GAS3-N350VS		1	NVSLPTTK	N[812]VSLPTTK	2	b	1	4	12	GAS3-N350VS	0	FALSE	0	0.99	FALSE	1
837	414.235	12	GAS3-N350VS		1	NVSLPTTK	N[837]VSLPTTK	2	b	1	4	12	GAS3-N350VS	0	FALSE	0	0.99	FALSE	1
862	414.235	12	GAS3-N350VS		1	NVSLPTTK	N[862]VSLPTTK	2	b	1	4	12	GAS3-N350VS	0	FALSE	0	0.99	FALSE	1
887	414.235	12	GAS3-N350VS		1	NVSLPTTK	N[887]VSLPTTK	2	b	1	4	12	GAS3-N350VS	0	FALSE	0	0.99	FALSE	1
912	414.235	12	GAS3-N350VS		1	NVSLPTTK	N[912]VSLPTTK	2	b	1	4	12	GAS3-N350VS	0	FALSE	0	0.99	FALSE	1
937	414.235	12	GAS3-N350VS		1	NVSLPTTK	N[937]VSLPTTK	2	b	1	4	12	GAS3-N350VS	0	FALSE	0	0.99	FALSE	1
962	414.235	12	GAS3-N350VS		1	NVSLPTTK	N[962]VSLPTTK	2	b	1	4	12	GAS3-N350VS	0	FALSE	0	0.99	FALSE	1
987	414.235	12	GAS3-N350VS		1	NVSLPTTK	N[987]VSLPTTK	2	b	1	4	12	GAS3-N350VS	0	FALSE	0	0.99	FALSE	1
1012	414.235	12	GAS3-N350VS		1	NVSLPTTK	N[1012]VSLPTTK	2	b	1	4	12	GAS3-N350VS	0	FALSE	0	0.99	FALSE	1
1037	414.235	12	GAS3-N350VS		1	NVSLPTTK	N[1037]VSLPTTK	2	b	1	4	12	GAS3-N350VS	0	FALSE	0	0.99	FALSE	1
1062	414.235	12	GAS3-N350VS		1	NVSLPTTK	N[1062]VSLPTTK	2	b	1	4	12	GAS3-N350VS	0	FALSE	0	0.99	FALSE	1
1087	414.235	12	GAS3-N350VS		1	NVSLPTTK	N[1087]VSLPTTK	2	b	1	4	12	GAS3-N350VS	0	FALSE	0	0.99	FALSE	1
1112	414.235	12	GAS3-N350VS		1	NVSLPTTK	N[1112]VSLPTTK	2	b	1	4	12	GAS3-N350VS	0	FALSE	0	0.99	FALSE	1
1137	414.235	12	GAS3-N350VS		1	NVSLPTTK	N[1137]VSLPTTK	2	b	1	4	12	GAS3-N350VS	0	FALSE	0	0.99	FALSE	1
1162	414.235	12	GAS3-N350VS		1	NVSLPTTK	N[1162]VSLPTTK	2	b	1	4	12	GAS3-N350VS	0	FALSE	0	0.99	FALSE	1
1187	414.235	12	GAS3-N350VS		1	NVSLPTTK	N[1187]VSLPTTK	2	b	1	4	12	GAS3-N350VS	0	FALSE	0	0.99	FALSE	1
1212	414.235	12	GAS3-N350VS		1	NVSLPTTK	N[1212]VSLPTTK	2	b	1	4	12	GAS3-N350VS	0	FALSE	0	0.99	FALSE	1
1237	414.235	12	GAS3-N350VS		1	NVSLPTTK	N[1237]VSLPTTK	2	b	1	4	12	GAS3-N350VS	0	FALSE	0	0.99	FALSE	1
412.5	446.261	12	GAS3-N350VS		1	NVSLPTTK	N[412]VSLPTTK	2	y	1	4	12	GAS3-N350VS	0	FALSE	0	0.99	FALSE	1
437	446.261	12	GAS3-N350VS		1	NVSLPTTK	N[437]VSLPTTK	2	y	1	4	12	GAS3-N350VS	0	FALSE	0	0.99	FALSE	1
462	446.261	12	GAS3-N350VS		1	NVSLPTTK	N[462]VSLPTTK	2	y	1	4	12	GAS3-N350VS	0	FALSE	0	0.99	FALSE	1
487	446.261	12	GAS3-N350VS		1	NVSLPTTK	N[487]VSLPTTK	2	y	1	4	12	GAS3-N350VS	0	FALSE	0	0.99	FALSE	1
512	446.261	12	GAS3-N350VS		1	NVSLPTTK	N[512]VSLPTTK	2	y	1	4	12	GAS3-N350VS	0	FALSE	0	0.99	FALSE	1
537	446.261	12	GAS3-N350VS		1	NVSLPTTK	N[537]VSLPTTK	2	y	1	4	12	GAS3-N350VS	0	FALSE	0	0.99	FALSE	1
562	446.261	12	GAS3-N350VS		1	NVSLPTTK	N[562]VSLPTTK	2	y	1	4	12	GAS3-N350VS	0	FALSE	0	0.99	FALSE	1
587	446.261	12	GAS3-N350VS		1	NVSLPTTK	N[587]VSLPTTK	2	y	1	4	12	GAS3-N350VS	0	FALSE	0	0.99	FALSE	1
612	446.261	12	GAS3-N350VS		1	NVSLPTTK	N[612]VSLPTTK	2	y	1	4	12	GAS3-N350VS	0	FALSE	0	0.99	FALSE	1
637	446.261	12	GAS3-N350VS		1	NVSLPTTK	N[637]VSLPTTK	2	y	1	4	12	GAS3-N350VS	0	FALSE	0	0.99	FALSE	1
662	446.261	12	GAS3-N350VS		1	NVSLPTTK	N[662]VSLPTTK	2	y	1	4	12	GAS3-N350VS	0	FALSE	0	0.99	FALSE	1
687	446.261	12	GAS3-N350VS		1	NVSLPTTK	N[687]VSLPTTK	2	y	1	4	12	GAS3-N350VS	0	FALSE	0	0.99	FALSE	1
712	446.261	12	GAS3-N350VS		1	NVSLPTTK	N[712]VSLPTTK	2	y	1	4	12	GAS3-N350VS	0	FALSE	0	0.99	FALSE	1
737	446.261	12	GAS3-N350VS		1	NVSLPTTK	N[737]VSLPTTK	2	y	1	4	12	GAS3-N350VS	0	FALSE	0	0.99	FALSE	1
762	446.261	12	GAS3-N350VS		1	NVSLPTTK	N[762]VSLPTTK	2	y	1	4	12	GAS3-N350VS	0	FALSE	0	0.99	FALSE	1
787	446.261	12	GAS3-N350VS		1	NVSLPTTK	N[787]VSLPTTK	2	y	1	4	12	GAS3-N350VS	0	FALSE	0	0.99	FALSE	1
812	446.261	12	GAS3-N350VS		1	NVSLPTTK	N[812]VSLPTTK	2	y	1	4	12	GAS3-N350VS	0	FALSE	0	0.99	FALSE	1
837	446.261	12	GAS3-N350VS		1	NVSLPTTK	N[837]VSLPTTK	2	y	1	4	12	GAS3-N350VS	0	FALSE	0	0.99	FALSE	1
862	446.261	12	GAS3-N350VS		1	NVSLPTTK	N[862]VSLPTTK	2	y	1	4	12	GAS3-N350VS	0	FALSE	0	0.99	FALSE	1
887	446.261	12	GAS3-N350VS		1	NVSLPTTK	N[887]VSLPTTK	2	y	1	4	12	GAS3-N350VS	0	FALSE	0	0.99	FALSE	1
912	446.261	12	GAS3-N350VS		1	NVSLPTTK	N[912]VSLPTTK	2	y	1	4	12	GAS3-N350VS	0	FALSE	0	0.99	FALSE	1
937	446.261	12	GAS3-N350VS		1	NVSLPTTK	N[937]VSLPTTK	2	y	1	4	12	GAS3-N350VS	0	FALSE	0	0.99	FALSE	1
962	446.261	12	GAS3-N350VS		1	NVSLPTTK	N[962]VSLPTTK	2	y	1	4	12	GAS3-N350VS	0	FALSE	0	0.99	FALSE	1
987	446.261	12	GAS3-N350VS		1	NVSLPTTK	N[987]VSLPTTK	2	y	1	4	12	GAS3-N350VS	0	FALSE	0	0.99	FALSE	1
1012	446.261	12	GAS3-N350VS		1	NVSLPTTK	N[1012]VSLPTTK	2	y	1	4	12	GAS3-N350VS	0	FALSE	0	0.99	FALSE	1
1037	446.261	12	GAS3-N350VS		1	NVSLPTTK	N[1037]VSLPTTK	2	y	1	4	12	GAS3-N350VS	0	FALSE	0	0.99	FALSE	1
1062	446.261	12	GAS3-N350VS		1	NVSLPTTK	N[1062]VSLPTTK	2	y	1	4	12	GAS3-N350VS	0	FALSE	0	0.99	FALSE	1
1087	446.261	12	GAS3-N350VS		1	NVSLPTTK	N[1087]VSLPTTK	2	y	1	4	12	GAS3-N350VS	0	FALSE	0	0.99	FALSE	1
1112	446.261	12	GAS3-N350VS		1	NVSLPTTK	N[1112]VSLPTTK	2	y	1	4	12	GAS3-N350VS	0	FALSE	0	0.99	FALSE	1
1137	446.261	12	GAS3-N350VS		1	NVSLPTTK	N[1137]VSLPTTK	2	y	1	4	12	GAS3-N350VS	0	FALSE	0	0.99	FALSE	1
1162	446.261	12	GAS3-N350VS		1	NVSLPTTK	N[1162]VSLPTTK	2	y	1	4	12	GAS3-N350VS	0	FALSE	0	0.99	FALSE	1
1187	446.261	12	GAS3-N350VS		1	NVSLPTTK	N[1187]VSLPTTK	2	y	1	4	12	GAS3-N350VS	0	FALSE	0	0.99	FALSE	1
1212	446.261	12	GAS3-N350VS		1	NVSLPTTK	N[1212]VSLPTTK	2	y	1	4	12	GAS3-N350VS	0	FALSE	0	0.99	FALSE	1
1237	446.261	12	GAS3-N350VS		1	NVSLPTTK	N[1237]VSLPTTK	2	y	1	4	12	GAS3-N350VS	0	FALSE	0	0.99	FALSE	1
412.5	207.621	12	GAS3-N350VS		1	NVSLPTTK	N[412]VSLPTTK	2	b	2	4	12	GAS3-N350VS	0	FALSE	0	0.99	FALSE	1
437	207.621	12	GAS3-N350VS		1	NVSLPTTK	N[437]VSLPTTK	2	b	2	4	12	GAS3-N350VS	0	FALSE	0	0.99	FALSE	1
462	207.621	12	GAS3-N350VS		1	NVSLPTTK	N[462]VSLPTTK	2	b	2	4	12	GAS3-N350VS	0	FALSE	0	0.99	FALSE	1
487	207.621	12	GAS3-N350VS		1	NVSLPTTK	N[487]VSLPTTK	2	b	2	4	12	GAS3-N350VS	0	FALSE	0	0.99	FALSE	1
512	207.621	12	GAS3-N350VS		1	NVSLPTTK	N[512]VSLPTTK	2	b	2	4	12	GAS3-N350VS	0	FALSE	0	0.99	FALSE	1
537	207.621	12	GAS3-N350VS		1	NVSLPTTK	N[537]VSLPTTK	2	b	2	4	12	GAS3-N350VS	0	FALSE	0	0.99	FALSE	1
562	207.621	12	GAS3-N350VS		1	NVSLPTTK	N[562]VSLPTTK	2	b	2	4	12	GAS3-N350VS	0	FALSE	0	0.99	FALSE	1
587	207.621	12	GAS3-N350VS		1	NVSLPTTK	N[587]VSLPTTK	2	b	2	4	12	GAS3-N350VS	0	FALSE	0	0.99	FALSE	1
612	207.621	12	GAS3-N350VS		1	NVSLPTTK	N[612]VSLPTTK	2	b	2	4	12	GAS3-N350VS	0	FALSE	0	0.99	FALSE	1
637	207.621	12	GAS3-N350VS		1	NVSLPTTK	N[637]VSLPTTK	2	b	2	4	12	GAS3-N350VS	0	FALSE	0	0.99	FALSE	1
662	207.621	12	GAS3-N350VS		1	NVSLPTTK	N[662]VSLPTTK	2	b	2	4	12	GAS3-N350VS	0	FALSE	0	0.99	FALSE	1
687	207.621	12	GAS3-N350VS		1	NVSLPTTK	N[687]VSLPTTK	2	b	2	4	12	GAS3-N350VS	0	FALSE	0	0.99	FALSE	1
712	207.621	12	GAS3-N350VS		1	NVSLPTTK	N[712]VSLPTTK	2	b	2	4	12	GAS3-N350VS	0	FALSE	0	0.99	FALSE	1
737	207.621	12	GAS3-N350VS		1	NVSLPTTK	N[737]VSLPTTK	2	b	2	4	12	GAS3-N350VS	0	FALSE	0	0.99	FALSE	1
762	207.621	12	GAS3-N350VS		1	NVSLPTTK	N[762]VSLPTTK	2	b	2	4	12	GAS3-N350VS	0	FALSE	0	0.99	FALSE	1
787	207.621	12	GAS3-N350VS		1	NVSLPTTK	N[787]VSLPTTK	2	b	2	4	12	GAS3-N350VS	0	FALSE	0	0.99	FALSE	1
812	207.621	12	GAS3-N350VS		1	NVSLPTTK	N[812]VSLPTTK	2	b	2	4	12	GAS3-N350VS	0	FALSE	0	0.99	FALSE	1
837	207.621	12	GAS3-N350VS		1	NVSLPTTK	N[837]VSLPTTK	2	b	2	4	12	GAS3-N350VS	0	FALSE	0	0.99	FALSE	1
862	207.621	12	GAS3-N350VS		1	NVSLPTTK	N[862]VSLPTTK	2	b	2	4	12	GAS3-N350VS	0	FALSE	0	0.99	FALSE	1
887	207.621	12	GAS3-N350VS		1	NVSLPTTK	N[887]VSLPTTK	2	b	2	4	12	GAS3-N350VS	0	FALSE	0	0.99	FALSE	1
912	207.621	12	GAS3-N350VS		1	NVSLPTTK	N[912]VSLPTTK	2	b	2	4	12	GAS3-N350VS	0	FALSE	0	0.99	FALSE	1
937	207.621	12	GAS3-N350VS		1	NVSLPTTK	N[937]VSLPTTK	2	b	2	4	12	GAS3-N350VS	0	FALSE	0	0.99	FALSE	1
962	207.621	12	GAS3-N350VS		1	NVSLPTTK	N[962]VSLPTTK	2	b	2	4	12	GAS3-N350VS	0	FALSE	0	0.99	FALSE	1
987	207.621	12	GAS3-N350VS		1	NVSLPTTK	N[987]VSLPTTK	2	b	2	4	12	GAS3-N350VS	0	FALSE	0	0.99	FALSE	1
1012	207.621	12	GAS3-N350VS		1	NVSLPTTK	N[1012]VSLPTTK	2	b	2	4	12	GAS3-N350VS	0	FALSE	0	0.99	FALSE	1
1037	207.621	12	GAS3-N350VS		1	NVSLPTTK	N[1037]VSLPTTK	2	b	2	4	12	GAS3-N350VS	0	FALSE	0	0.99	FALSE	1
1062	207.621	12	GAS3-N350VS		1	NVSLPTTK	N[1062]VSLPTTK	2	b	2	4	12	GAS3-N350VS	0	FALSE	0	0.99	FALSE	1
1087	207.621	12	GAS3-N350VS		1	NVSLPTTK	N[1087]VSLPTTK	2	b	2	4	12	GAS3-N350VS	0	FALSE	0	0.99	FALSE	1
1112	207.621	12	GAS3-N350VS		1	NVSLPTTK	N[1112]VSLPTTK	2	b	2	4	12	GAS3-N350VS	0	FALSE	0	0.99	FALSE	1
1137	207.621	12	GAS3-N350VS		1	NVSLPTTK	N[1137]VSLPTTK	2	b	2	4	12	GAS3-N350VS	0	FALSE	0	0.99	FALSE	1
1162	207.621	12	GAS3-N350VS		1	NVSLPTTK	N[1162]VSLPTTK	2	b	2	4	12	GAS3-N350VS	0	FALSE	0	0.99	FALSE	1
1187	207.621	12	GAS3-N350VS		1	NVSLPTTK	N[1187]VSLPTTK	2	b	2	4	12	GAS3-N350VS	0	FALSE	0	0.99	FALSE	1
1212	207.621	12	GAS3-N350VS		1	NVSLPTTK	N[1212]VSLPTTK	2	b	2	4	12	GAS3-N350VS	0	FALSE	0	0.99	FALSE	1
1237	207.621	12	GAS3-N350VS		1	NVSLPTTK	N[1237]VSLPTTK	2	b	2	4	12	GAS3-N350VS	0	FALSE	0	0.99	FALSE	1
412.5	223.634	12	GAS3-N350VS		1	NVSLPTTK	N[412]VSLPTTK	2	y	2	4	12	GAS3-N350VS	0	FALSE	0	0.99	FALSE	1
437	223.634	12	GAS3-N350VS		1	NVSLPTTK	N[437]VSLPTTK	2	y	2	4	12	GAS3-N350VS	0	FALSE	0	0.99	FALSE	1
462	223.634	12	GAS3-N350VS		1	NVSLPTTK	N[462]VSLPTTK	2	y	2	4	12	GAS3-N350VS	0	FALSE	0	0.99	FALSE	1
487	223.634	12	GAS3-N350VS		1	NVSLPTTK	N[487]VSLPTTK	2	y	2	4	12	GAS3-N350VS	0	FALSE	0	0.99	FALSE	1
512	223.634	12	GAS3-N350VS		1	NVSLPTTK	N[512]VSLPTTK	2	y	2	4	12	GAS3-N350VS	0	FALSE	0	0.99	FALSE	1
537	223.634	12	GAS3-N350VS		1	NVSLPTTK	N[537]VSLPTTK	2	y	2	4	12	GAS3-N350VS	0	FALSE	0	0.99	FALSE	1
562	223.634	12	GAS3-N350VS		1	NVSLPTTK	N[562]VSLPTTK	2	y	2	4	12	GAS3-N350VS	0	FALSE	0	0.99	FALSE	1
587	223.634	12	GAS3-N350VS		1	NVSLPTTK	N[587]VSLPTTK	2	y	2	4	12	GAS3-N350VS	0	FALSE	0	0.99	FALSE	1
612	223.634	12	GAS3-N350VS		1	NVSLPTTK	N[612]VSLPTTK	2	y	2	4	12	GAS3-N350VS	0	FALSE	0	0.99	FALSE	1
637	223.634	12	GAS3-N350VS		1	NVSLPTTK	N[637]VSLPTTK	2	y	2	4	12	GAS3-N350VS	0	FALSE	0	0.99	FALSE	1
662	223.634	12	GAS3-N350VS		1	NVSLPTTK	N[662]VSLPTTK	2	y	2	4	12	GAS3-N350VS	0	FALSE	0	0.99	FALSE	1
687	223.634	12	GAS3-N350VS		1	NVSLPTTK	N[687]VSLPTTK	2	y	2	4	12	GAS3-N350VS	0	FALSE	0	0.99	FALSE	1
712	223.634	12	GAS3-N350VS		1	NVSLPTTK	N[712]VSLPTTK	2	y	2	4	12	GAS3-N350VS	0	FALSE	0	0.99	FALSE	1
737	223.634	12	GAS3-N350VS		1	NVSLPTTK	N[737]VSLPTTK	2	y	2	4	12	GAS3-N350VS	0	FALSE	0	0.99	FALSE	1
762	223.634	12	GAS3-N350VS		1	NVSLPTTK	N[762]VSLPTTK	2	y	2	4	12	GAS3-N350VS	0	FALSE	0	0.99	FALSE	1
787	223.634	12	GAS3-N350VS		1	NVSLPTTK	N[787]VSLPTTK	2	y	2	4	12	GAS3-N350VS	0	FALSE	0	0.99	FALSE	1
812	223.634	12	GAS3-N350VS		1	NVSLPTTK	N[812]VSLPTTK	2	y	2	4	12	GAS3-N350VS	0	FALSE	0	0.99	FALSE	1
837	223.634	12	GAS3-N350VS		1	NVSLPTTK	N[837]VSLPTTK	2	y	2	4	12	GAS3-N350VS	0	FALSE	0	0.99	FALSE	1
862	223.634	12	GAS3-N350VS		1	NVSLPTTK	N[862]VSLPTTK	2	y	2	4	12	GAS3-N350VS	0	FALSE	0	0.99	FALSE	1
887	223.634	12	GAS3-N350VS		1	NVSLPTTK	N[887]VSLPTTK	2	y	2	4	12	GAS3-N350VS	0	FALSE	0	0.99	FALSE	1
912	223.634	12	GAS3-N350VS		1	NVSLPTTK	N[912]VSLPTTK	2	y	2	4	12	GAS3-N350VS	0	FALSE	0	0.99	FALSE	1
937	223.634	12	GAS3-N350VS		1	NVSLPTTK	N[937]VSLPTTK	2	y	2	4	12	GAS3-N350VS	0	FALSE	0	0.99	FALSE	1
962	223.634	12	GAS3-N350VS		1	NVSLPTTK	N[962]VSLPTTK	2	y	2	4	12	GAS3-N350VS	0	FALSE	0	0.99	FALSE	1
987	223.634	12	GAS3-N350VS		1	NVSLPTTK	N[987]VSLPTTK	2	y	2	4	12	GAS3-N350VS	0	FALSE	0	0.99	FALSE	1
1012	223.634	12	GAS3-N350VS		1	NVSLPTTK	N[1012]VSLPTTK	2	y	2	4	12	GAS3-N350VS	0	FALSE	0	0.99	FALSE	1
1037	223.634	12	GAS3-N350VS		1	NVSLPTTK	N[1037]VSLPTTK	2	y	2	4	12	GAS3-N350VS	0	FALSE	0	0.99	FALSE	1
1062	223.634	12	GAS3-N350VS		1	NVSLPTTK	N[1062]VSLPTTK	2	y	2	4	12	GAS3-N350VS	0	FALSE	0	0.99	FALSE	1
1087	223.634	12	GAS3-N350VS		1	NVSLPTTK	N[1087]VSLPTTK	2	y	2	4	12	GAS3-N350VS	0	FALSE	0	0.99	FALSE	1
1112	223.634	12	GAS3-N350VS		1	NVSLPTTK	N[1112]VSLPTTK	2	y	2	4	12	GAS3-N350VS	0	FALSE	0	0.99	FALSE	1
1137	223.634	12	GAS3-N350VS		1	NVSLPTTK	N[1137]VSLPTTK	2	y	2	4	12	GAS3-N350VS	0	FALSE	0	0.99	FALSE	1
1162	223.634	12	GAS3-N350VS		1	NVSLPTTK	N[1162]VSLPTTK	2	y	2	4	12	GAS3-N350VS	0	FALSE	0	0.99	FALSE	1
1187	223.634	12	GAS3-N350VS		1	NVSLPTTK	N[1187]VSLPTTK	2	y	2	4	12	GAS3-N350VS	0	FALSE	0	0.99	FALSE	1
1212	223.634	12	GAS3-N350VS		1	NVSLPTTK	N[1212]VSLPTTK	2	y	2	4	12	GAS3-N350VS	0	FALSE	0	0.99	FALSE	1
1237	223.634	12	GAS3-N350VS		1	NVSLPTTK	N[1237]VSLPTTK	2	y	2	4	12	GAS3-N350VS	0	FALSE	0	0.99	FALSE	1
412.5	511.288	12	GAS3-N350VS		1	NVSLPTTK	N[412]VSLPTTK	2	b	1	5	12	GAS3-N350VS	0	FALSE	0	0.99	FALSE	1
437	511.288	12	GAS3-N350VS		1	NVSLPTTK	N[437]VSLPTTK	2	b	1	5	12	GAS3-N350VS	0	FALSE	0	0.99	FALSE	1
462	511.288	12	GAS3-N350VS		1	NVSLPTTK	N[462]VSLPTTK	2	b	1	5	12	GAS3-N350VS	0	FALSE	0	0.99	FALSE	1
487	511.288	12	GAS3-N350VS		1	NVSLPTTK	N[487]VSLPTTK	2	b	1	5	12	GAS3-N350VS	0	FALSE	0	0.99	FALSE	1
512	511.288	12	GAS3-N350VS		1	NVSLPTTK	N[512]VSLPTTK	2	b	1	5	12	GAS3-N350VS	0	FALSE	0	0.99	FALSE	1
537	511.288	12	GAS3-N350VS		1	NVSLPTTK	N[537]VSLPTTK	2	b	1	5	12	GAS3-N350VS	0	FALSE	0	0.99	FALSE	1
562	511.288	12	GAS3-N350VS		1	NVSLPTTK	N[562]VSLPTTK	2	b	1	5	12	GAS3-N350VS	0	FALSE	0	0.99	FALSE	1
587	511.288	12	GAS3-N350VS		1	NVSLPTTK	N[587]VSLPTTK	2	b	1	5	12	GAS3-N350VS	0	FALSE	0	0.99	FALSE	1
612	511.288	12	GAS3-N350VS		1	NVSLPTTK	N[612]VSLPTTK	2	b	1	5	12	GAS3-N350VS	0	FALSE	0	0.99	FALSE	1
637	511.288	12	GAS3-N350VS		1	NVSLPTTK	N[637]VSLPTTK	2	b	1	5	12	GAS3-N350VS	0	FALSE	0	0.99	FALSE	1
662	511.288	12	GAS3-N350VS		1	NVSLPTTK	N[662]VSLPTTK	2	b	1	5	12	GAS3-N350VS	0	FALSE	0	0.99	FALSE	1
687	511.288	12	GAS3-N350VS		1	NVSLPTTK	N[687]VSLPTTK	2	b	1	5	12	GAS3-N350VS	0	FALSE	0	0.99	FALSE	1
712	511.288	12	GAS3-N350VS		1	NVSLPTTK	N[712]VSLPTTK	2	b	1	5	12	GAS3-N350VS	0	FALSE	0	0.99	FALSE	1
737	511.288	12	GAS3-N350VS		1	NVSLPTTK	N[737]VSLPTTK	2	b	1	5	12	GAS3-N350VS	0	FALSE	0	0.99	FALSE	1
762	511.288	12	GAS3-N350VS		1	NVSLPTTK	N[762]VSLPTTK	2	b	1	5	12	GAS3-N350VS	0	FALSE	0	0.99	FALSE	1
787	511.288	12	GAS3-N350VS		1	NVSLPTTK	N[787]VSLPTTK	2	b	1	5	12	GAS3-N350VS	0	FALSE	0	0.99	FALSE	1
812	511.288	12	GAS3-N350VS		1	NVSLPTTK	N[812]VSLPTTK	2	b	1	5	12	GAS3-N350VS	0	FALSE	0	0.99	FALSE	1
837	511.288	12	GAS3-N350VS		1	NVSLPTTK	N[837]VSLPTTK	2	b	1	5	12	GAS3-N350VS	0	FALSE	0	0.99	FALSE	1
862	511.288	12	GAS3-N350VS		1	NVSLPTTK	N[862]VSLPTTK	2	b	1	5	12	GAS3-N350VS	0	FALSE	0	0.99	FALSE	1
887	511.288	12	GAS3-N350VS		1	NVSLPTTK	N[887]VSLPTTK	2	b	1	5	12	GAS3-N350VS	0	FALSE	0	0.99	FALSE	1
912	511.288	12	GAS3-N350VS		1	NVSLPTTK	N[912]VSLPTTK	2	b	1	5	12	GAS3-N350VS	0	FALSE	0	0.99	FALSE	1
937	511.288	12	GAS3-N350VS		1	NVSLPTTK	N[937]VSLPTTK	2	b	1	5	12	GAS3-N350VS	0	FALSE	0	0.99	FALSE	1
962	511.288	12	GAS3-N350VS		1	NVSLPTTK	N[962]VSLPTTK	2	b	1	5	12	GAS3-N350VS	0	FALSE	0	0.99	FALSE	1
987	511.288	12	GAS3-N350VS		1	NVSLPTTK	N[987]VSLPTTK	2	b	1	5	12	GAS3-N350VS	0	FALSE	0	0.99	FALSE	1
1012	511.288	12	GAS3-N350VS		1	NVSLPTTK	N[1012]VSLPTTK	2	b	1	5	12	GAS3-N350VS	0	FALSE	0	0.99	FALSE	1
1037	511.288	12	GAS3-N350VS		1	NVSLPTTK	N[1037]VSLPTTK	2	b	1	5	12	GAS3-N350VS	0	FALSE	0	0.99	FALSE	1
1062	511.288	12	GAS3-N350VS		1	NVSLPTTK	N[1062]VSLPTTK	2	b	1	5	12	GAS3-N350VS	0	FALSE	0	0.99	FALSE	1
1087	511.288	12	GAS3-N350VS		1	NVSLPTTK	N[1087]VSLPTTK	2	b	1	5	12	GAS3-N350VS	0	FALSE	0	0.99	FALSE	1
1112	511.288	12	GAS3-N350VS		1	NVSLPTTK	N[1112]VSLPTTK	2	b	1	5	12	GAS3-N350VS	0	FALSE	0	0.99	FALSE	1
1137	511.288	12	GAS3-N350VS		1	NVSLPTTK	N[1137]VSLPTTK	2	b	1	5	12	GAS3-N350VS	0	FALSE	0	0.99	FALSE	1
1162	511.288	12	GAS3-N350VS		1	NVSLPTTK	N[1162]VSLPTTK	2	b	1	5	12	GAS3-N350VS	0	FALSE	0	0.99	FALSE	1
1187	511.288	12	GAS3-N350VS		1	NVSLPTTK	N[1187]VSLPTTK	2	b	1	5	12	GAS3-N350VS	0	FALSE	0	0.99	FALSE	1
1212	511.288	12	GAS3-N350VS		1	NVSLPTTK	N[1212]VSLPTTK	2	b	1	5	12	GAS3-N350VS	0	FALSE	0	0.99	FALSE	1
1237	511.288	12	GAS3-N350VS		1	NVSLPTTK	N[1237]VSLPTTK	2	b	1	5	12	GAS3-N350VS	0	FALSE	0	0.99	FALSE	1
412.5	559.345	12	GAS3-N350VS		1	NVSLPTTK	N[412]VSLPTTK	2	y	1	5	12	GAS3-N350VS	0	FALSE	0	0.99	FALSE	1
437	559.345	12	GAS3-N350VS		1	NVSLPTTK	N[437]VSLPTTK	2	y	1	5	12	GAS3-N350VS	0	FALSE	0	0.99	FALSE	1
462	559.345	12	GAS3-N350VS		1	NVSLPTTK	N[462]VSLPTTK	2	y	1	5	12	GAS3-N350VS	0	FALSE	0	0.99	FALSE	1
487	559.345	12	GAS3-N350VS		1	NVSLPTTK	N[487]VSLPTTK	2	y	1	5	12	GAS3-N350VS	0	FALSE	0	0.99	FALSE	1
512	559.345	12	GAS3-N350VS		1	NVSLPTTK	N[512]VSLPTTK	2	y	1	5	12	GAS3-N350VS	0	FALSE	0	0.99	FALSE	1
537	559.345	12	GAS3-N350VS		1	NVSLPTTK	N[537]VSLPTTK	2	y	1	5	12	GAS3-N350VS	0	FALSE	0	0.99	FALSE	1
562	559.345	12	GAS3-N350VS		1	NVSLPTTK	N[562]VSLPTTK	2	y	1	5	12	GAS3-N350VS	0	FALSE	0	0.99	FALSE	1
587	559.345	12	GAS3-N350VS		1	NVSLPTTK	N[587]VSLPTTK	2	y	1	5	12	GAS3-N350VS	0	FALSE	0	0.99	FALSE	1
612	559.345	12	GAS3-N350VS		1	NVSLPTTK	N[612]VSLPTTK	2	y	1	5	12	GAS3-N350VS	0	FALSE	0	0.99	FALSE	1
637	559.345	12	GAS3-N350VS		1	NVSLPTTK	N[637]VSLPTTK	2	y	1	5	12	GAS3-N350VS	0	FALSE	0	0.99	FALSE	1
662	559.345	12	GAS3-N350VS		1	NVSLPTTK	N[662]VSLPTTK	2	y	1	5	12	GAS3-N350VS	0	FALSE	0	0.99	FALSE	1
687	559.345	12	GAS3-N350VS		1	NVSLPTTK	N[687]VSLPTTK	2	y	1	5	12	GAS3-N350VS	0	FALSE	0	0.99	FALSE	1
712	559.345	12	GAS3-N350VS		1	NVSLPTTK	N[712]VSLPTTK	2	y	1	5	12	GAS3-N350VS	0	FALSE	0	0.99	FALSE	1
737	559.345	12	GAS3-N350VS		1	NVSLPTTK	N[737]VSLPTTK	2	y	1	5	12	GAS3-N350VS	0	FALSE	0	0.99	FALSE	1
762	559.345	12	GAS3-N350VS		1	NVSLPTTK	N[762]VSLPTTK	2	y	1	5	12	GAS3-N350VS	0	FALSE	0	0.99	FALSE	1
787	559.345	12	GAS3-N350VS		1	NVSLPTTK	N[787]VSLPTTK	2	y	1	5	12	GAS3-N350VS	0	FALSE	0	0.99	FALSE	1
812	559.345	12	GAS3-N350VS		1	NVSLPTTK	N[812]VSLPTTK	2	y	1	5	12	GAS3-N350VS	0	FALSE	0	0.99	FALSE	1
837	559.345	12	GAS3-N350VS		1	NVSLPTTK	N[837]VSLPTTK	2	y	1	5	12	GAS3-N350VS	0	FALSE	0	0.99	FALSE	1
862	559.345	12	GAS3-N350VS		1	NVSLPTTK	N[862]VSLPTTK	2	y	1	5	12	GAS3-N350VS	0	FALSE	0	0.99	FALSE	1
887	559.345	12	GAS3-N350VS		1	NVSLPTTK	N[887]VSLPTTK	2	y	1	5	12	GAS3-N350VS	0	FALSE	0	0.99	FALSE	1
912	559.345	12	GAS3-N350VS		1	NVSLPTTK	N[912]VSLPTTK	2	y	1	5	12	GAS3-N350VS	0	FALSE	0	0.99	FALSE	1
937	559.345	12	GAS3-N350VS		1	NVSLPTTK	N[937]VSLPTTK	2	y	1	5	12	GAS3-N350VS	0	FALSE	0	0.99	FALSE	1
962	559.345	12	GAS3-N350VS		1	NVSLPTTK	N[962]VSLPTTK	2	y	1	5	12	GAS3-N350VS	0	FALSE	0	0.99	FALSE	1
987	559.345	12	GAS3-N350VS		1	NVSLPTTK	N[987]VSLPTTK	2	y	1	5	12	GAS3-N350VS	0	FALSE	0	0.99	FALSE	1
1012	559.345	12	GAS3-N350VS		1	NVSLPTTK	N[1012]VSLPTTK	2	y	1	5	12	GAS3-N350VS	0	FALSE	0	0.99	FALSE	1
1037	559.345	12	GAS3-N350VS		1	NVSLPTTK	N[1037]VSLPTTK	2	y	1	5	12	GAS3-N350VS	0	FALSE	0	0.99	FALSE	1
1062	559.345	12	GAS3-N350VS		1	NVSLPTTK	N[1062]VSLPTTK	2	y	1	5	12	GAS3-N350VS	0	FALSE	0	0.99	FALSE	1
1087	559.345	12	GAS3-N350VS		1	NVSLPTTK	N[1087]VSLPTTK	2	y	1	5	12	GAS3-N350VS	0	FALSE	0	0.99	FALSE	1
1112	559.345	12	GAS3-N350VS		1	NVSLPTTK	N[1112]VSLPTTK	2	y	1	5	12	GAS3-N350VS	0	FALSE	0	0.99	FALSE	1
1137	559.345	12	GAS3-N350VS		1	NVSLPTTK	N[1137]VSLPTTK	2	y	1	5	12	GAS3-N350VS	0	FALSE	0	0.99	FALSE	1
1162	559.345	12	GAS3-N350VS		1	NVSLPTTK	N[1162]VSLPTTK	2	y	1	5	12	GAS3-N350VS	0	FALSE	0	0.99	FALSE	1
1187	559.345	12	GAS3-N350VS		1	NVSLPTTK	N[1187]VSLPTTK	2	y	1	5	12	GAS3-N350VS	0	FALSE	0	0.99	FALSE	1
1212	559.345	12	GAS3-N350VS		1	NVSLPTTK	N[1212]VSLPTTK	2	y	1	5	12	GAS3-N350VS	0	FALSE	0	0.99	FALSE	1
1237	559.345	12	GAS3-N350VS		1	NVSLPTTK	N[1237]VSLPTTK	2	y	1	5	12	GAS3-N350VS	0	FALSE	0	0.99	FALSE	1
412.5	256.147	12	GAS3-N350VS		1	NVSLPTTK	N[412]VSLPTTK	2	b	2	5	12	GAS3-N350VS	0	FALSE	0	0.99	FALSE	1
437	256.147	12	GAS3-N350VS		1	NVSLPTTK	N[437]VSLPTTK	2	b	2	5	12	GAS3-N350VS	0	FALSE	0	0.99	FALSE	1
462	256.147	12	GAS3-N350VS		1	NVSLPTTK	N[462]VSLPTTK	2	b	2	5	12	GAS3-N350VS	0	FALSE	0	0.99	FALSE	1
487	256.147	12	GAS3-N350VS		1	NVSLPTTK	N[487]VSLPTTK	2	b	2	5	12	GAS3-N350VS	0	FALSE	0	0.99	FALSE	1
512	256.147	12	GAS3-N350VS		1	NVSLPTTK	N[512]VSLPTTK	2	b	2	5	12	GAS3-N350VS	0	FALSE	0	0.99	FALSE	1
537	256.147	12	GAS3-N350VS		1	NVSLPTTK	N[537]VSLPTTK	2	b	2	5	12	GAS3-N350VS	0	FALSE	0	0.99	FALSE	1
562	256.147	12	GAS3-N350VS		1	NVSLPTTK	N[562]VSLPTTK	2	b	2	5	12	GAS3-N350VS	0	FALSE	0	0.99	FALSE	1
587	256.147	12	GAS3-N350VS		1	NVSLPTTK	N[587]VSLPTTK	2	b	2	5	12	GAS3-N350VS	0	FALSE	0	0.99	FALSE	1
612	256.147	12	GAS3-N350VS		1	NVSLPTTK	N[612]VSLPTTK	2	b	2	5	12	GAS3-N350VS	0	FALSE	0	0.99	FALSE	1
637	256.147	12	GAS3-N350VS		1	NVSLPTTK	N[637]VSLPTTK	2	b	2	5	12	GAS3-N350VS	0	FALSE	0	0.99	FALSE	1
662	256.147	12	GAS3-N350VS		1	NVSLPTTK	N[662]VSLPTTK	2	b	2	5	12	GAS3-N350VS	0	FALSE	0	0.99	FALSE	1
687	256.147	12	GAS3-N350VS		1	NVSLPTTK	N[687]VSLPTTK	2	b	2	5	12	GAS3-N350VS	0	FALSE	0	0.99	FALSE	1
712	256.147	12	GAS3-N350VS		1	NVSLPTTK	N[712]VSLPTTK	2	b	2	5	12	GAS3-N350VS	0	FALSE	0	0.99	FALSE	1
737	256.147	12	GAS3-N350VS		1	NVSLPTTK	N[737]VSLPTTK	2	b	2	5	12	GAS3-N350VS	0	FALSE	0	0.99	FALSE	1
762	256.147	12	GAS3-N350VS		1	NVSLPTTK	N[762]VSLPTTK	2	b	2	5	12	GAS3-N350VS	0	FALSE	0	0.99	FALSE	1
787	256.147	12	GAS3-N350VS		1	NVSLPTTK	N[787]VSLPTTK	2	b	2	5	12	GAS3-N350VS	0	FALSE	0	0.99	FALSE	1
812	256.147	12	GAS3-N350VS		1	NVSLPTTK	N[812]VSLPTTK	2	b	2	5	12	GAS3-N350VS	0	FALSE	0	0.99	FALSE	1
837	256.147	12	GAS3-N350VS		1	NVSLPTTK	N[837]VSLPTTK	2	b	2	5	12	GAS3-N350VS	0	FALSE	0	0.99	FALSE	1
862	256.147	12	GAS3-N350VS		1	NVSLPTTK	N[862]VSLPTTK	2	b	2	5	12	GAS3-N350VS	0	FALSE	0	0.99	FALSE	1
887	256.147	12	GAS3-N350VS		1	NVSLPTTK	N[887]VSLPTTK	2	b	2	5	12	GAS3-N350VS	0	FALSE	0	0.99	FALSE	1
912	256.147	12	GAS3-N350VS		1	NVSLPTTK	N[912]VSLPTTK	2	b	2	5	12	GAS3-N350VS	0	FALSE	0	0.99	FALSE	1
937	256.147	12	GAS3-N350VS		1	NVSLPTTK	N[937]VSLPTTK	2	b	2	5	12	GAS3-N350VS	0	FALSE	0	0.99	FALSE	1
962	256.147	12	GAS3-N350VS		1	NVSLPTTK	N[962]VSLPTTK	2	b	2	5	12	GAS3-N350VS	0	FALSE	0	0.99	FALSE	1
987	256.147	12	GAS3-N350VS		1	NVSLPTTK	N[987]VSLPTTK	2	b	2	5	12	GAS3-N350VS	0	FALSE	0	0.99	FALSE	1
1012	256.147	12	GAS3-N350VS		1	NVSLPTTK	N[1012]VSLPTTK	2	b	2	5	12	GAS3-N350VS	0	FALSE	0	0.99	FALSE	1
1037	256.147	12	GAS3-N350VS		1	NVSLPTTK	N[1037]VSLPTTK	2	b	2	5	12	GAS3-N350VS	0	FALSE	0	0.99	FALSE	1
1062	256.147	12	GAS3-N350VS		1	NVSLPTTK	N[1062]VSLPTTK	2	b	2	5	12	GAS3-N350VS	0	FALSE	0	0.99	FALSE	1
1087	256.147	12	GAS3-N350VS		1	NVSLPTTK	N[1087]VSLPTTK	2	b	2	5	12	GAS3-N350VS	0	FALSE	0	0.99	FALSE	1
1112	256.147	12	GAS3-N350VS		1	NVSLPTTK	N[1112]VSLPTTK	2	b	2	5	12	GAS3-N350VS	0	FALSE	0	0.99	FALSE	1
1137	256.147	12	GAS3-N350VS		1	NVSLPTTK	N[1137]VSLPTTK	2	b	2	5	12	GAS3-N350VS	0	FALSE	0	0.99	FALSE	1
1162	256.147	12	GAS3-N350VS		1	NVSLPTTK	N[1162]VSLPTTK	2	b	2	5	12	GAS3-N350VS	0	FALSE	0	0.99	FALSE	1
1187	256.147	12	GAS3-N350VS		1	NVSLPTTK	N[1187]VSLPTTK	2	b	2	5	12	GAS3-N350VS	0	FALSE	0	0.99	FALSE	1
1212	256.147	12	GAS3-N350VS		1	NVSLPTTK	N[1212]VSLPTTK	2	b	2	5	12	GAS3-N350VS	0	FALSE	0	0.99	FALSE	1
1237	256.147	12	GAS3-N350VS		1	NVSLPTTK	N[1237]VSLPTTK	2	b	2	5	12	GAS3-N350VS	0	FALSE	0	0.99	FALSE	1
412.5	280.176	12	GAS3-N350VS		1	NVSLPTTK	N[412]VSLPTTK	2	y	2	5	12	GAS3-N350VS	0	FALSE	0	0.99	FALSE	1
437	280.176	12	GAS3-N350VS		1	NVSLPTTK	N[437]VSLPTTK	2	y	2	5	12	GAS3-N350VS	0	FALSE	0	0.99	FALSE	1
462	280.176	12	GAS3-N350VS		1	NVSLPTTK	N[462]VSLPTTK	2	y	2	5	12	GAS3-N350VS	0	FALSE	0	0.99	FALSE	1
487	280.176	12	GAS3-N350VS		1	NVSLPTTK	N[487]VSLPTTK	2	y	2	5	12	GAS3-N350VS	0	FALSE	0	0.99	FALSE	1
512	280.176	12	GAS3-N350VS		1	NVSLPTTK	N[512]VSLPTTK	2	y	2	5	12	GAS3-N350VS	0	FALSE	0	0.99	FALSE	1
537	280.176	12	GAS3-N350VS		1	NVSLPTTK	N[537]VSLPTTK	2	y	2	5	12	GAS3-N350VS	0	FALSE	0	0.99	FALSE	1
562	280.176	12	GAS3-N350VS		1	NVSLPTTK	N[562]VSLPTTK	2	y	2	5	12	GAS3-N350VS	0	FALSE	0	0.99	FALSE	1
587	280.176	12	GAS3-N350VS		1	NVSLPTTK	N[587]VSLPTTK	2	y	2	5	12	GAS3-N350VS	0	FALSE	0	0.99	FALSE	1
612	280.176	12	GAS3-N350VS		1	NVSLPTTK	N[612]VSLPTTK	2	y	2	5	12	GAS3-N350VS	0	FALSE	0	0.99	FALSE	1
637	280.176	12	GAS3-N350VS		1	NVSLPTTK	N[637]VSLPTTK	2	y	2	5	12	GAS3-N350VS	0	FALSE	0	0.99	FALSE	1
662	280.176	12	GAS3-N350VS		1	NVSLPTTK	N[662]VSLPTTK	2	y	2	5	12	GAS3-N350VS	0	FALSE	0	0.99	FALSE	1
687	280.176	12	GAS3-N350VS		1	NVSLPTTK	N[687]VSLPTTK	2	y	2	5	12	GAS3-N350VS	0	FALSE	0	0.99	FALSE	1
712	280.176	12	GAS3-N350VS		1	NVSLPTTK	N[712]VSLPTTK	2	y	2	5	12	GAS3-N350VS	0	FALSE	0	0.99	FALSE	1
737	280.176	12	GAS3-N350VS		1	NVSLPTTK	N[737]VSLPTTK	2	y	2	5	12	GAS3-N350VS	0	FALSE	0	0.99	FALSE	1
762	280.176	12	GAS3-N350VS		1	NVSLPTTK	N[762]VSLPTTK	2	y	2	5	12	GAS3-N350VS	0	FALSE	0	0.99	FALSE	1
787	280.176	12	GAS3-N350VS		1	NVSLPTTK	N[787]VSLPTTK	2	y	2	5	12	GAS3-N350VS	0	FALSE	0	0.99	FALSE	1
812	280.176	12	GAS3-N350VS		1	NVSLPTTK	N[812]VSLPTTK	2	y	2	5	12	GAS3-N350VS	0	FALSE	0	0.99	FALSE	1
837	280.176	12	GAS3-N350VS		1	NVSLPTTK	N[837]VSLPTTK	2	y	2	5	12	GAS3-N350VS	0	FALSE	0	0.99	FALSE	1
862	280.176	12	GAS3-N350VS		1	NVSLPTTK	N[862]VSLPTTK	2	y	2	5	12	GAS3-N350VS	0	FALSE	0	0.99	FALSE	1
887	280.176	12	GAS3-N350VS		1	NVSLPTTK	N[887]VSLPTTK	2	y	2	5	12	GAS3-N350VS	0	FALSE	0	0.99	FALSE	1
912	280.176	12	GAS3-N350VS		1	NVSLPTTK	N[912]VSLPTTK	2	y	2	5	12	GAS3-N350VS	0	FALSE	0	0.99	FALSE	1
937	280.176	12	GAS3-N350VS		1	NVSLPTTK	N[937]VSLPTTK	2	y	2	5	12	GAS3-N350VS	0	FALSE	0	0.99	FALSE	1
962	280.176	12	GAS3-N350VS		1	NVSLPTTK	N[962]VSLPTTK	2	y	2	5	12	GAS3-N350VS	0	FALSE	0	0.99	FALSE	1
987	280.176	12	GAS3-N350VS		1	NVSLPTTK	N[987]VSLPTTK	2	y	2	5	12	GAS3-N350VS	0	FALSE	0	0.99	FALSE	1
1012	280.176	12	GAS3-N350VS		1	NVSLPTTK	N[1012]VSLPTTK	2	y	2	5	12	GAS3-N350VS	0	FALSE	0	0.99	FALSE	1
1037	280.176	12	GAS3-N350VS		1	NVSLPTTK	N[1037]VSLPTTK	2	y	2	5	12	GAS3-N350VS	0	FALSE	0	0.99	FALSE	1
1062	280.176	12	GAS3-N350VS		1	NVSLPTTK	N[1062]VSLPTTK	2	y	2	5	12	GAS3-N350VS	0	FALSE	0	0.99	FALSE	1
1087	280.176	12	GAS3-N350VS		1	NVSLPTTK	N[1087]VSLPTTK	2	y	2	5	12	GAS3-N350VS	0	FALSE	0	0.99	FALSE	1
1112	280.176	12	GAS3-N350VS		1	NVSLPTTK	N[1112]VSLPTTK	2	y	2	5	12	GAS3-N350VS	0	FALSE	0	0.99	FALSE	1
1137	280.176	12	GAS3-N350VS		1	NVSLPTTK	N[1137]VSLPTTK	2	y	2	5	12	GAS3-N350VS	0	FALSE	0	0.99	FALSE	1
1162	280.176	12	GAS3-N350VS		1	NVSLPTTK	N[1162]VSLPTTK	2	y	2	5	12	GAS3-N350VS	0	FALSE	0	0.99	FALSE	1
1187	280.176	12	GAS3-N350VS		1	NVSLPTTK	N[1187]VSLPTTK	2	y	2	5	12	GAS3-N350VS	0	FALSE	0	0.99	FALSE	1
1212	280.176	12	GAS3-N350VS		1	NVSLPTTK	N[1212]VSLPTTK	2	y	2	5	12	GAS3-N350VS	0	FALSE	0	0.99	FALSE	1
1237	280.176	12	GAS3-N350VS		1	NVSLPTTK	N[1237]VSLPTTK	2	y	2	5	12	GAS3-N350VS	0	FALSE	0	0.99	FALSE	1
412.5	612.335	12	GAS3-N350VS		1	NVSLPTTK	N[412]VSLPTTK	2	b	1	6	12	GAS3-N350VS	0	FALSE	0	0.99	FALSE	1
437	612.335	12	GAS3-N350VS		1	NVSLPTTK	N[437]VSLPTTK	2	b	1	6	12	GAS3-N350VS	0	FALSE	0	0.99	FALSE	1
462	612.335	12	GAS3-N350VS		1	NVSLPTTK	N[462]VSLPTTK	2	b	1	6	12	GAS3-N350VS	0	FALSE	0	0.99	FALSE	1
487	612.335	12	GAS3-N350VS		1	NVSLPTTK	N[487]VSLPTTK	2	b	1	6	12	GAS3-N350VS	0	FALSE	0	0.99	FALSE	1
512	612.335	12	GAS3-N350VS		1	NVSLPTTK	N[512]VSLPTTK	2	b	1	6	12	GAS3-N350VS	0	FALSE	0	0.99	FALSE	1
537	612.335	12	GAS3-N350VS		1	NVSLPTTK	N[537]VSLPTTK	2	b	1	6	12	GAS3-N350VS	0	FALSE	0	0.99	FALSE	1
562	612.335	12	GAS3-N350VS		1	NVSLPTTK	N[562]VSLPTTK	2	b	1	6	12	GAS3-N350VS	0	FALSE	0	0.99	FALSE	1
587	612.335	12	GAS3-N350VS		1	NVSLPTTK	N[587]VSLPTTK	2	b	1	6	12	GAS3-N350VS	0	FALSE	0	0.99	FALSE	1
612	612.335	12	GAS3-N350VS		1	NVSLPTTK	N[612]VSLPTTK	2	b	1	6	12	GAS3-N350VS	0	FALSE	0	0.99	FALSE	1
637	612.335	12	GAS3-N350VS		1	NVSLPTTK	N[637]VSLPTTK	2	b	1	6	12	GAS3-N350VS	0	FALSE	0	0.99	FALSE	1
662	612.335	12	GAS3-N350VS		1	NVSLPTTK	N[662]VSLPTTK	2	b	1	6	12	GAS3-N350VS	0	FALSE	0	0.99	FALSE	1
687	612.335	12	GAS3-N350VS		1	NVSLPTTK	N[687]VSLPTTK	2	b	1	6	12	GAS3-N350VS	0	FALSE	0	0.99	FALSE	1
712	612.335	12	GAS3-N350VS		1	NVSLPTTK	N[712]VSLPTTK	2	b	1	6	12	GAS3-N350VS	0	FALSE	0	0.99	FALSE	1
737	612.335	12	GAS3-N350VS		1	NVSLPTTK	N[737]VSLPTTK	2	b	1	6	12	GAS3-N350VS	0	FALSE	0	0.99	FALSE	1
762	612.335	12	GAS3-N350VS		1	NVSLPTTK	N[762]VSLPTTK	2	b	1	6	12	GAS3-N350VS	0	FALSE	0	0.99	FALSE	1
787	612.335	12	GAS3-N350VS		1	NVSLPTTK	N[787]VSLPTTK	2	b	1	6	12	GAS3-N350VS	0	FALSE	0	0.99	FALSE	1
812	612.335	12	GAS3-N350VS		1	NVSLPTTK	N[812]VSLPTTK	2	b	1	6	12	GAS3-N350VS	0	FALSE	0	0.99	FALSE	1
837	612.335	12	GAS3-N350VS		1	NVSLPTTK	N[837]VSLPTTK	2	b	1	6	12	GAS3-N350VS	0	FALSE	0	0.99	FALSE	1
862	612.335	12	GAS3-N350VS		1	NVSLPTTK	N[862]VSLPTTK	2	b	1	6	12	GAS3-N350VS	0	FALSE	0	0.99	FALSE	1
887	612.335	12	GAS3-N350VS		1	NVSLPTTK	N[887]VSLPTTK	2	b	1	6	12	GAS3-N350VS	0	FALSE	0	0.99	FALSE	1
912	612.335	12	GAS3-N350VS		1	NVSLPTTK	N[912]VSLPTTK	2	b	1	6	12	GAS3-N350VS	0	FALSE	0	0.99	FALSE	1
937	612.335	12	GAS3-N350VS		1	NVSLPTTK	N[937]VSLPTTK	2	b	1	6	12	GAS3-N350VS	0	FALSE	0	0.99	FALSE	1
962	612.335	12	GAS3-N350VS		1	NVSLPTTK	N[962]VSLPTTK	2	b	1	6	12	GAS3-N350VS	0	FALSE	0	0.99	FALSE	1
987	612.335	12	GAS3-N350VS		1	NVSLPTTK	N[987]VSLPTTK	2	b	1	6	12	GAS3-N350VS	0	FALSE	0	0.99	FALSE	1
1012	612.335	12	GAS3-N350VS		1	NVSLPTTK	N[1012]VSLPTTK	2	b	1	6	12	GAS3-N350VS	0	FALSE	0	0.99	FALSE	1
1037	612.335	12	GAS3-N350VS		1	NVSLPTTK	N[1037]VSLPTTK	2	b	1	6	12	GAS3-N350VS	0	FALSE	0	0.99	FALSE	1
1062	612.335	12	GAS3-N350VS		1	NVSLPTTK	N[1062]VSLPTTK	2	b	1	6	12	GAS3-N350VS	0	FALSE	0	0.99	FALSE	1
1087	612.335	12	GAS3-N350VS		1	NVSLPTTK	N[1087]VSLPTTK	2	b	1	6	12	GAS3-N350VS	0	FALSE	0	0.99	FALSE	1
1112	612.335	12	GAS3-N350VS		1	NVSLPTTK	N[1112]VSLPTTK	2	b	1	6	12	GAS3-N350VS	0	FALSE	0	0.99	FALSE	1
1137	612.335	12	GAS3-N350VS		1	NVSLPTTK	N[1137]VSLPTTK	2	b	1	6	12	GAS3-N350VS	0	FALSE	0	0.99	FALSE	1
1162	612.335	12	GAS3-N350VS		1	NVSLPTTK	N[1162]VSLPTTK	2	b	1	6	12	GAS3-N350VS	0	FALSE	0	0.99	FALSE	1
1187	612.335	12	GAS3-N350VS		1	NVSLPTTK	N[1187]VSLPTTK	2	b	1	6	12	GAS3-N350VS	0	FALSE	0	0.99	FALSE	1
1212	612.335	12	GAS3-N350VS		1	NVSLPTTK	N[1212]VSLPTTK	2	b	1	6	12	GAS3-N350VS	0	FALSE	0	0.99	FALSE	1
1237	612.335	12	GAS3-N350VS		1	NVSLPTTK	N[1237]VSLPTTK	2	b	1	6	12	GAS3-N350VS	0	FALSE	0	0.99	FALSE	1
412.5	646.377	12	GAS3-N350VS		1	NVSLPTTK	N[412]VSLPTTK	2	y	1	6	12	GAS3-N350VS	0	FALSE	0	0.99	FALSE	1
437	646.377	12	GAS3-N350VS		1	NVSLPTTK	N[437]VSLPTTK	2	y	1	6	12	GAS3-N350VS	0	FALSE	0	0.99	FALSE	1
462	646.377	12	GAS3-N350VS		1	NVSLPTTK	N[462]VSLPTTK	2	y	1	6	12	GAS3-N350VS	0	FALSE	0	0.99	FALSE	1
487	646.377	12	GAS3-N350VS		1	NVSLPTTK	N[487]VSLPTTK	2	y	1	6	12	GAS3-N350VS	0	FALSE	0	0.99	FALSE	1
512	646.377	12	GAS3-N350VS		1	NVSLPTTK	N[512]VSLPTTK	2	y	1	6	12	GAS3-N350VS	0	FALSE	0	0.99	FALSE	1
537	646.377	12	GAS3-N350VS		1	NVSLPTTK	N[537]VSLPTTK	2	y	1	6	12	GAS3-N350VS	0	FALSE	0	0.99	FALSE	1
562	646.377	12	GAS3-N350VS		1	NVSLPTTK	N[562]VSLPTTK	2	y	1	6	12	GAS3-N350VS	0	FALSE	0	0.99	FALSE	1
587	646.377	12	GAS3-N350VS		1	NVSLPTTK	N[587]VSLPTTK	2	y	1	6	12	GAS3-N350VS	0	FALSE	0	0.99	FALSE	1
612	646.377	12	GAS3-N350VS		1	NVSLPTTK	N[612]VSLPTTK	2	y	1	6	12	GAS3-N350VS	0	FALSE	0	0.99	FALSE	1
637	646.377	12	GAS3-N350VS		1	NVSLPTTK	N[637]VSLPTTK	2	y	1	6	12	GAS3-N350VS	0	FALSE	0	0.99	FALSE	1
662	646.377	12	GAS3-N350VS		1	NVSLPTTK	N[662]VSLPTTK	2	y	1	6	12	GAS3-N350VS	0	FALSE	0	0.99	FALSE	1
687	646.377	12	GAS3-N350VS		1	NVSLPTTK	N[687]VSLPTTK	2	y	1	6	12	GAS3-N350VS	0	FALSE	0	0.99	FALSE	1
712	646.377	12	GAS3-N350VS		1	NVSLPTTK	N[712]VSLPTTK	2	y	1	6	12	GAS3-N350VS	0	FALSE	0	0.99	FALSE	1
737	646.377	12	GAS3-N350VS		1	NVSLPTTK	N[737]VSLPTTK	2	y	1	6	12	GAS3-N350VS	0	FALSE	0	0.99	FALSE	1
762	646.377	12	GAS3-N350VS		1	NVSLPTTK	N[762]VSLPTTK	2	y	1	6	12	GAS3-N350VS	0	FALSE	0	0.99	FALSE	1
787	646.377	12	GAS3-N350VS		1	NVSLPTTK	N[787]VSLPTTK	2	y	1	6	12	GAS3-N350VS	0	FALSE	0	0.99	FALSE	1
812	646.377	12	GAS3-N350VS		1	NVSLPTTK	N[812]VSLPTTK	2	y	1	6	12	GAS3-N350VS	0	FALSE	0	0.99	FALSE	1
837	646.377	12	GAS3-N350VS		1	NVSLPTTK	N[837]VSLPTTK	2	y	1	6	12	GAS3-N350VS	0	FALSE	0	0.99	FALSE	1
862	646.377	12	GAS3-N350VS		1	NVSLPTTK	N[862]VSLPTTK	2	y	1	6	12	GAS3-N350VS	0	FALSE	0	0.99	FALSE	1
887	646.377	12	GAS3-N350VS		1	NVSLPTTK	N[887]VSLPTTK	2	y	1	6	12	GAS3-N350VS	0	FALSE	0	0.99	FALSE	1
912	646.377	12	GAS3-N350VS		1	NVSLPTTK	N[912]VSLPTTK	2	y	1	6	12	GAS3-N350VS	0	FALSE	0	0.99	FALSE	1
937	646.377	12	GAS3-N350VS		1	NVSLPTTK	N[937]VSLPTTK	2	y	1	6	12	GAS3-N350VS	0	FALSE	0	0.99	FALSE	1
962	646.377	12	GAS3-N350VS		1	NVSLPTTK	N[962]VSLPTTK	2	y	1	6	12	GAS3-N350VS	0	FALSE	0	0.99	FALSE	1
987	646.377	12	GAS3-N350VS		1	NVSLPTTK	N[987]VSLPTTK	2	y	1	6	12	GAS3-N350VS	0	FALSE	0	0.99	FALSE	1
1012	646.377	12	GAS3-N350VS		1	NVSLPTTK	N[1012]VSLPTTK	2	y	1	6	12	GAS3-N350VS	0	FALSE	0	0.99	FALSE	1
1037	646.377	12	GAS3-N350VS		1	NVSLPTTK	N[1037]VSLPTTK	2	y	1	6	12	GAS3-N350VS	0	FALSE	0	0.99	FALSE	1
1062	646.377	12	GAS3-N350VS		1	NVSLPTTK	N[1062]VSLPTTK	2	y	1	6	12	GAS3-N350VS	0	FALSE	0	0.99	FALSE	1
1087	646.377	12	GAS3-N350VS		1	NVSLPTTK	N[1087]VSLPTTK	2	y	1	6	12	GAS3-N350VS	0	FALSE	0	0.99	FALSE	1
1112	646.377	12	GAS3-N350VS		1	NVSLPTTK	N[1112]VSLPTTK	2	y	1	6	12	GAS3-N350VS	0	FALSE	0	0.99	FALSE	1
1137	646.377	12	GAS3-N350VS		1	NVSLPTTK	N[1137]VSLPTTK	2	y	1	6	12	GAS3-N350VS	0	FALSE	0	0.99	FALSE	1
1162	646.377	12	GAS3-N350VS		1	NVSLPTTK	N[1162]VSLPTTK	2	y	1	6	12	GAS3-N350VS	0	FALSE	0	0.99	FALSE	1
1187	646.377	12	GAS3-N350VS		1	NVSLPTTK	N[1187]VSLPTTK	2	y	1	6	12	GAS3-N350VS	0	FALSE	0	0.99	FALSE	1
1212	646.377	12	GAS3-N350VS		1	NVSLPTTK	N[1212]VSLPTTK	2	y	1	6	12	GAS3-N350VS	0	FALSE	0	0.99	FALSE	1
1237	646.377	12	GAS3-N350VS		1	NVSLPTTK	N[1237]VSLPTTK	2	y	1	6	12	GAS3-N350VS	0	FALSE	0	0.99	FALSE	1
412.5	306.671	12	GAS3-N350VS		1	NVSLPTTK	N[412]VSLPTTK	2	b	2	6	12	GAS3-N350VS	0	FALSE	0	0.99	FALSE	1
437	306.671	12	GAS3-N350VS		1	NVSLPTTK	N[437]VSLPTTK	2	b	2	6	12	GAS3-N350VS	0	FALSE	0	0.99	FALSE	1
462	306.671	12	GAS3-N350VS		1	NVSLPTTK	N[462]VSLPTTK	2	b	2	6	12	GAS3-N350VS	0	FALSE	0	0.99	FALSE	1
487	306.671	12	GAS3-N350VS		1	NVSLPTTK	N[487]VSLPTTK	2	b	2	6	12	GAS3-N350VS	0	FALSE	0	0.99	FALSE	1
512	306.671	12	GAS3-N350VS		1	NVSLPTTK	N[512]VSLPTTK	2	b	2	6	12	GAS3-N350VS	0	FALSE	0	0.99	FALSE	1
537	306.671	12	GAS3-N350VS		1	NVSLPTTK	N[537]VSLPTTK	2	b	2	6	12	GAS3-N350VS	0	FALSE	0	0.99	FALSE	1
562	306.671	12	GAS3-N350VS		1	NVSLPTTK	N[562]VSLPTTK	2	b	2	6	12	GAS3-N350VS	0	FALSE	0	0.99	FALSE	1
587	306.671	12	GAS3-N350VS		1	NVSLPTTK	N[587]VSLPTTK	2	b	2	6	12	GAS3-N350VS	0	FALSE	0	0.99	FALSE	1
612	306.671	12	GAS3-N350VS		1	NVSLPTTK	N[612]VSLPTTK	2	b	2	6	12	GAS3-N350VS	0	FALSE	0	0.99	FALSE	1
637	306.671	12	GAS3-N350VS		1	NVSLPTTK	N[637]VSLPTTK	2	b	2	6	12	GAS3-N350VS	0	FALSE	0	0.99	FALSE	1
662	306.671	12	GAS3-N350VS		1	NVSLPTTK	N[662]VSLPTTK	2	b	2	6	12	GAS3-N350VS	0	FALSE	0	0.99	FALSE	1
687	306.671	12	GAS3-N350VS		1	NVSLPTTK	N[687]VSLPTTK	2	b	2	6	12	GAS3-N350VS	0	FALSE	0	0.99	FALSE	1
712	306.671	12	GAS3-N350VS		1	NVSLPTTK	N[712]VSLPTTK	2	b	2	6	12	GAS3-N350VS	0	FALSE	0	0.99	FALSE	1
737	306.671	12	GAS3-N350VS		1	NVSLPTTK	N[737]VSLPTTK	2	b	2	6	12	GAS3-N350VS	0	FALSE	0	0.99	FALSE	1
762	306.671	12	GAS3-N350VS		1	NVSLPTTK	N[762]VSLPTTK	2	b	2	6	12	GAS3-N350VS	0	FALSE	0	0.99	FALSE	1
787	306.671	12	GAS3-N350VS		1	NVSLPTTK	N[787]VSLPTTK	2	b	2	6	12	GAS3-N350VS	0	FALSE	0	0.99	FALSE	1
812	306.671	12	GAS3-N350VS		1	NVSLPTTK	N[812]VSLPTTK	2	b	2	6	12	GAS3-N350VS	0	FALSE	0	0.99	FALSE	1
837	306.671	12	GAS3-N350VS		1	NVSLPTTK	N[837]VSLPTTK	2	b	2	6	12	GAS3-N350VS	0	FALSE	0	0.99	FALSE	1
862	306.671	12	GAS3-N350VS		1	NVSLPTTK	N[862]VSLPTTK	2	b	2	6	12	GAS3-N350VS	0	FALSE	0	0.99	FALSE	1
887	306.671	12	GAS3-N350VS		1	NVSLPTTK	N[887]VSLPTTK	2	b	2	6	12	GAS3-N350VS	0	FALSE	0	0.99	FALSE	1
912	306.671	12	GAS3-N350VS		1	NVSLPTTK	N[912]VSLPTTK	2	b	2	6	12	GAS3-N350VS	0	FALSE	0	0.99	FALSE	1
937	306.671	12	GAS3-N350VS		1	NVSLPTTK	N[937]VSLPTTK	2	b	2	6	12	GAS3-N350VS	0	FALSE	0	0.99	FALSE	1
962	306.671	12	GAS3-N350VS		1	NVSLPTTK	N[962]VSLPTTK	2	b	2	6	12	GAS3-N350VS	0	FALSE	0	0.99	FALSE	1
987	306.671	12	GAS3-N350VS		1	NVSLPTTK	N[987]VSLPTTK	2	b	2	6	12	GAS3-N350VS	0	FALSE	0	0.99	FALSE	1
1012	306.671	12	GAS3-N350VS		1	NVSLPTTK	N[1012]VSLPTTK	2	b	2	6	12	GAS3-N350VS	0	FALSE	0	0.99	FALSE	1
1037	306.671	12	GAS3-N350VS		1	NVSLPTTK	N[1037]VSLPTTK	2	b	2	6	12	GAS3-N350VS	0	FALSE	0	0.99	FALSE	1
1062	306.671	12	GAS3-N350VS		1	NVSLPTTK	N[1062]VSLPTTK	2	b	2	6	12	GAS3-N350VS	0	FALSE	0	0.99	FALSE	1
1087	306.671	12	GAS3-N350VS		1	NVSLPTTK	N[1087]VSLPTTK	2	b	2	6	12	GAS3-N350VS	0	FALSE	0	0.99	FALSE	1
1112	306.671	12	GAS3-N350VS		1	NVSLPTTK	N[1112]VSLPTTK	2	b	2	6	12	GAS3-N350VS	0	FALSE	0	0.99	FALSE	1
1137	306.671	12	GAS3-N350VS		1	NVSLPTTK	N[1137]VSLPTTK	2	b	2	6	12	GAS3-N350VS	0	FALSE	0	0.99	FALSE	1
1162	306.671	12	GAS3-N350VS		1	NVSLPTTK	N[1162]VSLPTTK	2	b	2	6	12	GAS3-N350VS	0	FALSE	0	0.99	FALSE	1
1187	306.671	12	GAS3-N350VS		1	NVSLPTTK	N[1187]VSLPTTK	2	b	2	6	12	GAS3-N350VS	0	FALSE	0	0.99	FALSE	1
1212	306.671	12	GAS3-N350VS		1	NVSLPTTK	N[1212]VSLPTTK	2	b	2	6	12	GAS3-N350VS	0	FALSE	0	0.99	FALSE	1
1237	306.671	12	GAS3-N350VS		1	NVSLPTTK	N[1237]VSLPTTK	2	b	2	6	12	GAS3-N350VS	0	FALSE	0	0.99	FALSE	1
412.5	323.692	12	GAS3-N350VS		1	NVSLPTTK	N[412]VSLPTTK	2	y	2	6	12	GAS3-N350VS	0	FALSE	0	0.99	FALSE	1
437	323.692	12	GAS3-N350VS		1	NVSLPTTK	N[437]VSLPTTK	2	y	2	6	12	GAS3-N350VS	0	FALSE	0	0.99	FALSE	1
462	323.692	12	GAS3-N350VS		1	NVSLPTTK	N[462]VSLPTTK	2	y	2	6	12	GAS3-N350VS	0	FALSE	0	0.99	FALSE	1
487	323.692	12	GAS3-N350VS		1	NVSLPTTK	N[487]VSLPTTK	2	y	2	6	12	GAS3-N350VS	0	FALSE	0	0.99	FALSE	1
512	323.692	12	GAS3-N350VS		1	NVSLPTTK	N[512]VSLPTTK	2	y	2	6	12	GAS3-N350VS	0	FALSE	0	0.99	FALSE	1
537	323.692	12	GAS3-N350VS		1	NVSLPTTK	N[537]VSLPTTK	2	y	2	6	12	GAS3-N350VS	0	FALSE	0	0.99	FALSE	1
562	323.692	12	GAS3-N350VS		1	NVSLPTTK	N[562]VSLPTTK	2	y	2	6	12	GAS3-N350VS	0	FALSE	0	0.99	FALSE	1
587	323.692	12	GAS3-N350VS		1	NVSLPTTK	N[587]VSLPTTK	2	y	2	6	12	GAS3-N350VS	0	FALSE	0	0.99	FALSE	1
612	323.692	12	GAS3-N350VS		1	NVSLPTTK	N[612]VSLPTTK	2	y	2	6	12	GAS3-N350VS	0	FALSE	0	0.99	FALSE	1
637	323.692	12	GAS3-N350VS		1	NVSLPTTK	N[637]VSLPTTK	2	y	2	6	12	GAS3-N350VS	0	FALSE	0	0.99	FALSE	1
662	323.692	12	GAS3-N350VS		1	NVSLPTTK	N[662]VSLPTTK	2	y	2	6	12	GAS3-N350VS	0	FALSE	0	0.99	FALSE	1
687	323.692	12	GAS3-N350VS		1	NVSLPTTK	N[687]VSLPTTK	2	y	2	6	12	GAS3-N350VS	0	FALSE	0	0.99	FALSE	1
712	323.692	12	GAS3-N350VS		1	NVSLPTTK	N[712]VSLPTTK	2	y	2	6	12	GAS3-N350VS	0	FALSE	0	0.99	FALSE	1
737	323.692	12	GAS3-N350VS		1	NVSLPTTK	N[737]VSLPTTK	2	y	2	6	12	GAS3-N350VS	0	FALSE	0	0.99	FALSE	1
762	323.692	12	GAS3-N350VS		1	NVSLPTTK	N[762]VSLPTTK	2	y	2	6	12	GAS3-N350VS	0	FALSE	0	0.99	FALSE	1
787	323.692	12	GAS3-N350VS		1	NVSLPTTK	N[787]VSLPTTK	2	y	2	6	12	GAS3-N350VS	0	FALSE	0	0.99	FALSE	1
812	323.692	12	GAS3-N350VS		1	NVSLPTTK	N[812]VSLPTTK	2	y	2	6	12	GAS3-N350VS	0	FALSE	0	0.99	FALSE	1
837	323.692	12	GAS3-N350VS		1	NVSLPTTK	N[837]VSLPTTK	2	y	2	6	12	GAS3-N350VS	0	FALSE	0	0.99	FALSE	1
862	323.692	12	GAS3-N350VS		1	NVSLPTTK	N[862]VSLPTTK	2	y	2	6	12	GAS3-N350VS	0	FALSE	0	0.99	FALSE	1
887	323.692	12	GAS3-N350VS		1	NVSLPTTK	N[887]VSLPTTK	2	y	2	6	12	GAS3-N350VS	0	FALSE	0	0.99	FALSE	1
912	323.692	12	GAS3-N350VS		1	NVSLPTTK	N[912]VSLPTTK	2	y	2	6	12	GAS3-N350VS	0	FALSE	0	0.99	FALSE	1
937	323.692	12	GAS3-N350VS		1	NVSLPTTK	N[937]VSLPTTK	2	y	2	6	12	GAS3-N350VS	0	FALSE	0	0.99	FALSE	1
962	323.692	12	GAS3-N350VS		1	NVSLPTTK	N[962]VSLPTTK	2	y	2	6	12	GAS3-N350VS	0	FALSE	0	0.99	FALSE	1
987	323.692	12	GAS3-N350VS		1	NVSLPTTK	N[987]VSLPTTK	2	y	2	6	12	GAS3-N350VS	0	FALSE	0	0.99	FALSE	1
1012	323.692	12	GAS3-N350VS		1	NVSLPTTK	N[1012]VSLPTTK	2	y	2	6	12	GAS3-N350VS	0	FALSE	0	0.99	FALSE	1
1037	323.692	12	GAS3-N350VS		1	NVSLPTTK	N[1037]VSLPTTK	2	y	2	6	12	GAS3-N350VS	0	FALSE	0	0.99	FALSE	1
1062	323.692	12	GAS3-N350VS		1	NVSLPTTK	N[1062]VSLPTTK	2	y	2	6	12	GAS3-N350VS	0	FALSE	0	0.99	FALSE	1
1087	323.692	12	GAS3-N350VS		1	NVSLPTTK	N[1087]VSLPTTK	2	y	2	6	12	GAS3-N350VS	0	FALSE	0	0.99	FALSE	1
1112	323.692	12	GAS3-N350VS		1	NVSLPTTK	N[1112]VSLPTTK	2	y	2	6	12	GAS3-N350VS	0	FALSE	0	0.99	FALSE	1
1137	323.692	12	GAS3-N350VS		1	NVSLPTTK	N[1137]VSLPTTK	2	y	2	6	12	GAS3-N350VS	0	FALSE	0	0.99	FALSE	1
1162	323.692	12	GAS3-N350VS		1	NVSLPTTK	N[1162]VSLPTTK	2	y	2	6	12	GAS3-N350VS	0	FALSE	0	0.99	FALSE	1
1187	323.692	12	GAS3-N350VS		1	NVSLPTTK	N[1187]VSLPTTK	2	y	2	6	12	GAS3-N350VS	0	FALSE	0	0.99	FALSE	1
1212	323.692	12	GAS3-N350VS		1	NVSLPTTK	N[1212]VSLPTTK	2	y	2	6	12	GAS3-N350VS	0	FALSE	0	0.99	FALSE	1
1237	323.692	12	GAS3-N350VS		1	NVSLPTTK	N[1237]VSLPTTK	2	y	2	6	12	GAS3-N350VS	0	FALSE	0	0.99	FALSE	1
412.5	713.383	12	GAS3-N350VS		1	NVSLPTTK	N[412]VSLPTTK	2	b	1	7	12	GAS3-N350VS	0	FALSE	0	0.99	FALSE	1
437	713.383	12	GAS3-N350VS		1	NVSLPTTK	N[437]VSLPTTK	2	b	1	7	12	GAS3-N350VS	0	FALSE	0	0.99	FALSE	1
462	713.383	12	GAS3-N350VS		1	NVSLPTTK	N[462]VSLPTTK	2	b	1	7	12	GAS3-N350VS	0	FALSE	0	0.99	FALSE	1
487	713.383	12	GAS3-N350VS		1	NVSLPTTK	N[487]VSLPTTK	2	b	1	7	12	GAS3-N350VS	0	FALSE	0	0.99	FALSE	1
512	713.383	12	GAS3-N350VS		1	NVSLPTTK	N[512]VSLPTTK	2	b	1	7	12	GAS3-N350VS	0	FALSE	0	0.99	FALSE	1
537	713.383	12	GAS3-N350VS		1	NVSLPTTK	N[537]VSLPTTK	2	b	1	7	12	GAS3-N350VS	0	FALSE	0	0.99	FALSE	1
562	713.383	12	GAS3-N350VS		1	NVSLPTTK	N[562]VSLPTTK	2	b	1	7	12	GAS3-N350VS	0	FALSE	0	0.99	FALSE	1
587	713.383	12	GAS3-N350VS		1	NVSLPTTK	N[587]VSLPTTK	2	b	1	7	12	GAS3-N350VS	0	FALSE	0	0.99	FALSE	1
612	713.383	12	GAS3-N350VS		1	NVSLPTTK	N[612]VSLPTTK	2	b	1	7	12	GAS3-N350VS	0	FALSE	0	0.99	FALSE	1
637	713.383	12	GAS3-N350VS		1	NVSLPTTK	N[637]VSLPTTK	2	b	1	7	12	GAS3-N350VS	0	FALSE	0	0.99	FALSE	1
662	713.383	12	GAS3-N350VS		1	NVSLPTTK	N[662]VSLPTTK	2	b	1	7	12	GAS3-N350VS	0	FALSE	0	0.99	FALSE	1
687	713.383	12	GAS3-N350VS		1	NVSLPTTK	N[687]VSLPTTK	2	b	1	7	12	GAS3-N350VS	0	FALSE	0	0.99	FALSE	1
712	713.383	12	GAS3-N350VS		1	NVSLPTTK	N[712]VSLPTTK	2	b	1	7	12	GAS3-N350VS	0	FALSE	0	0.99	FALSE	1
737	713.383	12	GAS3-N350VS		1	NVSLPTTK	N[737]VSLPTTK	2	b	1	7	12	GAS3-N350VS	0	FALSE	0	0.99	FALSE	1
762	713.383	12	GAS3-N350VS		1	NVSLPTTK	N[762]VSLPTTK	2	b	1	7	12	GAS3-N350VS	0	FALSE	0	0.99	FALSE	1
787	713.383	12	GAS3-N350VS		1	NVSLPTTK	N[787]VSLPTTK	2	b	1	7	12	GAS3-N350VS	0	FALSE	0	0.99	FALSE	1
812	713.383	12	GAS3-N350VS		1	NVSLPTTK	N[812]VSLPTTK	2	b	1	7	12	GAS3-N350VS	0	FALSE	0	0.99	FALSE	1
837	713.383	12	GAS3-N350VS		1	NVSLPTTK	N[837]VSLPTTK	2	b	1	7	12	GAS3-N350VS	0	FALSE	0	0.99	FALSE	1
862	713.383	12	GAS3-N350VS		1	NVSLPTTK	N[862]VSLPTTK	2	b	1	7	12	GAS3-N350VS	0	FALSE	0	0.99	FALSE	1
887	713.383	12	GAS3-N350VS		1	NVSLPTTK	N[887]VSLPTTK	2	b	1	7	12	GAS3-N350VS	0	FALSE	0	0.99	FALSE	1
912	713.383	12	GAS3-N350VS		1	NVSLPTTK	N[912]VSLPTTK	2	b	1	7	12	GAS3-N350VS	0	FALSE	0	0.99	FALSE	1
937	713.383	12	GAS3-N350VS		1	NVSLPTTK	N[937]VSLPTTK	2	b	1	7	12	GAS3-N350VS	0	FALSE	0	0.99	FALSE	1
962	713.383	12	GAS3-N350VS		1	NVSLPTTK	N[962]VSLPTTK	2	b	1	7	12	GAS3-N350VS	0	FALSE	0	0.99	FALSE	1
987	713.383	12	GAS3-N350VS		1	NVSLPTTK	N[987]VSLPTTK	2	b	1	7	12	GAS3-N350VS	0	FALSE	0	0.99	FALSE	1
1012	713.383	12	GAS3-N350VS		1	NVSLPTTK	N[1012]VSLPTTK	2	b	1	7	12	GAS3-N350VS	0	FALSE	0	0.99	FALSE	1
1037	713.383	12	GAS3-N350VS		1	NVSLPTTK	N[1037]VSLPTTK	2	b	1	7	12	GAS3-N350VS	0	FALSE	0	0.99	FALSE	1
1062	713.383	12	GAS3-N350VS		1	NVSLPTTK	N[1062]VSLPTTK	2	b	1	7	12	GAS3-N350VS	0	FALSE	0	0.99	FALSE	1
1087	713.383	12	GAS3-N350VS		1	NVSLPTTK	N[1087]VSLPTTK	2	b	1	7	12	GAS3-N350VS	0	FALSE	0	0.99	FALSE	1
1112	713.383	12	GAS3-N350VS		1	NVSLPTTK	N[1112]VSLPTTK	2	b	1	7	12	GAS3-N350VS	0	FALSE	0	0.99	FALSE	1
1137	713.383	12	GAS3-N350VS		1	NVSLPTTK	N[1137]VSLPTTK	2	b	1	7	12	GAS3-N350VS	0	FALSE	0	0.99	FALSE	1
1162	713.383	12	GAS3-N350VS		1	NVSLPTTK	N[1162]VSLPTTK	2	b	1	7	12	GAS3-N350VS	0	FALSE	0	0.99	FALSE	1
1187	713.383	12	GAS3-N350VS		1	NVSLPTTK	N[1187]VSLPTTK	2	b	1	7	12	GAS3-N350VS	0	FALSE	0	0.99	FALSE	1
1212	713.383	12	GAS3-N350VS		1	NVSLPTTK	N[1212]VSLPTTK	2	b	1	7	12	GAS3-N350VS	0	FALSE	0	0.99	FALSE	1
1237	713.383	12	GAS3-N350VS		1	NVSLPTTK	N[1237]VSLPTTK	2	b	1	7	12	GAS3-N350VS	0	FALSE	0	0.99	FALSE	1
412.5	745.445	12	GAS3-N350VS		1	NVSLPTTK	N[412]VSLPTTK	2	y	1	7	12	GAS3-N350VS	0	FALSE	0	0.99	FALSE	1
437	745.445	12	GAS3-N350VS		1	NVSLPTTK	N[437]VSLPTTK	2	y	1	7	12	GAS3-N350VS	0	FALSE	0	0.99	FALSE	1
462	745.445	12	GAS3-N350VS		1	NVSLPTTK	N[462]VSLPTTK	2	y	1	7	12	GAS3-N350VS	0	FALSE	0	0.99	FALSE	1
487	745.445	12	GAS3-N350VS		1	NVSLPTTK	N[487]VSLPTTK	2	y	1	7	12	GAS3-N350VS	0	FALSE	0	0.99	FALSE	1
512	745.445	12	GAS3-N350VS		1	NVSLPTTK	N[512]VSLPTTK	2	y	1	7	12	GAS3-N350VS	0	FALSE	0	0.99	FALSE	1
537	745.445	12	GAS3-N350VS		1	NVSLPTTK	N[537]VSLPTTK	2	y	1	7	12	GAS3-N350VS	0	FALSE	0	0.99	FALSE	1
562	745.445	12	GAS3-N350VS		1	NVSLPTTK	N[562]VSLPTTK	2	y	1	7	12	GAS3-N350VS	0	FALSE	0	0.99	FALSE	1
587	745.445	12	GAS3-N350VS		1	NVSLPTTK	N[587]VSLPTTK	2	y	1	7	12	GAS3-N350VS	0	FALSE	0	0.99	FALSE	1
612	745.445	12	GAS3-N350VS		1	NVSLPTTK	N[612]VSLPTTK	2	y	1	7	12	GAS3-N350VS	0	FALSE	0	0.99	FALSE	1
637	745.445	12	GAS3-N350VS		1	NVSLPTTK	N[637]VSLPTTK	2	y	1	7	12	GAS3-N350VS	0	FALSE	0	0.99	FALSE	1
662	745.445	12	GAS3-N350VS		1	NVSLPTTK	N[662]VSLPTTK	2	y	1	7	12	GAS3-N350VS	0	FALSE	0	0.99	FALSE	1
687	745.445	12	GAS3-N350VS		1	NVSLPTTK	N[687]VSLPTTK	2	y	1	7	12	GAS3-N350VS	0	FALSE	0	0.99	FALSE	1
712	745.445	12	GAS3-N350VS		1	NVSLPTTK	N[712]VSLPTTK	2	y	1	7	12	GAS3-N350VS	0	FALSE	0	0.99	FALSE	1
737	745.445	12	GAS3-N350VS		1	NVSLPTTK	N[737]VSLPTTK	2	y	1	7	12	GAS3-N350VS	0	FALSE	0	0.99	FALSE	1
762	745.445	12	GAS3-N350VS		1	NVSLPTTK	N[762]VSLPTTK	2	y	1	7	12	GAS3-N350VS	0	FALSE	0	0.99	FALSE	1
787	745.445	12	GAS3-N350VS		1	NVSLPTTK	N[787]VSLPTTK	2	y	1	7	12	GAS3-N350VS	0	FALSE	0	0.99	FALSE	1
812	745.445	12	GAS3-N350VS		1	NVSLPTTK	N[812]VSLPTTK	2	y	1	7	12	GAS3-N350VS	0	FALSE	0	0.99	FALSE	1
837	745.445	12	GAS3-N350VS		1	NVSLPTTK	N[837]VSLPTTK	2	y	1	7	12	GAS3-N350VS	0	FALSE	0	0.99	FALSE	1
862	745.445	12	GAS3-N350VS		1	NVSLPTTK	N[862]VSLPTTK	2	y	1	7	12	GAS3-N350VS	0	FALSE	0	0.99	FALSE	1
887	745.445	12	GAS3-N350VS		1	NVSLPTTK	N[887]VSLPTTK	2	y	1	7	12	GAS3-N350VS	0	FALSE	0	0.99	FALSE	1
912	745.445	12	GAS3-N350VS		1	NVSLPTTK	N[912]VSLPTTK	2	y	1	7	12	GAS3-N350VS	0	FALSE	0	0.99	FALSE	1
937	745.445	12	GAS3-N350VS		1	NVSLPTTK	N[937]VSLPTTK	2	y	1	7	12	GAS3-N350VS	0	FALSE	0	0.99	FALSE	1
962	745.445	12	GAS3-N350VS		1	NVSLPTTK	N[962]VSLPTTK	2	y	1	7	12	GAS3-N350VS	0	FALSE	0	0.99	FALSE	1
987	745.445	12	GAS3-N350VS		1	NVSLPTTK	N[987]VSLPTTK	2	y	1	7	12	GAS3-N350VS	0	FALSE	0	0.99	FALSE	1
1012	745.445	12	GAS3-N350VS		1	NVSLPTTK	N[1012]VSLPTTK	2	y	1	7	12	GAS3-N350VS	0	FALSE	0	0.99	FALSE	1
1037	745.445	12	GAS3-N350VS		1	NVSLPTTK	N[1037]VSLPTTK	2	y	1	7	12	GAS3-N350VS	0	FALSE	0	0.99	FALSE	1
1062	745.445	12	GAS3-N350VS		1	NVSLPTTK	N[1062]VSLPTTK	2	y	1	7	12	GAS3-N350VS	0	FALSE	0	0.99	FALSE	1
1087	745.445	12	GAS3-N350VS		1	NVSLPTTK	N[1087]VSLPTTK	2	y	1	7	12	GAS3-N350VS	0	FALSE	0	0.99	FALSE	1
1112	745.445	12	GAS3-N350VS		1	NVSLPTTK	N[1112]VSLPTTK	2	y	1	7	12	GAS3-N350VS	0	FALSE	0	0.99	FALSE	1
1137	745.445	12	GAS3-N350VS		1	NVSLPTTK	N[1137]VSLPTTK	2	y	1	7	12	GAS3-N350VS	0	FALSE	0	0.99	FALSE	1
1162	745.445	12	GAS3-N350VS		1	NVSLPTTK	N[1162]VSLPTTK	2	y	1	7	12	GAS3-N350VS	0	FALSE	0	0.99	FALSE	1
1187	745.445	12	GAS3-N350VS		1	NVSLPTTK	N[1187]VSLPTTK	2	y	1	7	12	GAS3-N350VS	0	FALSE	0	0.99	FALSE	1
1212	745.445	12	GAS3-N350VS		1	NVSLPTTK	N[1212]VSLPTTK	2	y	1	7	12	GAS3-N350VS	0	FALSE	0	0.99	FALSE	1
1237	745.445	12	GAS3-N350VS		1	NVSLPTTK	N[1237]VSLPTTK	2	y	1	7	12	GAS3-N350VS	0	FALSE	0	0.99	FALSE	1
412.5	357.195	12	GAS3-N350VS		1	NVSLPTTK	N[412]VSLPTTK	2	b	2	7	12	GAS3-N350VS	0	FALSE	0	0.99	FALSE	1
437	357.195	12	GAS3-N350VS		1	NVSLPTTK	N[437]VSLPTTK	2	b	2	7	12	GAS3-N350VS	0	FALSE	0	0.99	FALSE	1
462	357.195	12	GAS3-N350VS		1	NVSLPTTK	N[462]VSLPTTK	2	b	2	7	12	GAS3-N350VS	0	FALSE	0	0.99	FALSE	1
487	357.195	12	GAS3-N350VS		1	NVSLPTTK	N[487]VSLPTTK	2	b	2	7	12	GAS3-N350VS	0	FALSE	0	0.99	FALSE	1
512	357.195	12	GAS3-N350VS		1	NVSLPTTK	N[512]VSLPTTK	2	b	2	7	12	GAS3-N350VS	0	FALSE	0	0.99	FALSE	1
537	357.195	12	GAS3-N350VS		1	NVSLPTTK	N[537]VSLPTTK	2	b	2	7	12	GAS3-N350VS	0	FALSE	0	0.99	FALSE	1
562	357.195	12	GAS3-N350VS		1	NVSLPTTK	N[562]VSLPTTK	2	b	2	7	12	GAS3-N350VS	0	FALSE	0	0.99	FALSE	1
587	357.195	12	GAS3-N350VS		1	NVSLPTTK	N[587]VSLPTTK	2	b	2	7	12	GAS3-N350VS	0	FALSE	0	0.99	FALSE	1
612	357.195	12	GAS3-N350VS		1	NVSLPTTK	N[612]VSLPTTK	2	b	2	7	12	GAS3-N350VS	0	FALSE	0	0.99	FALSE	1
637	357.195	12	GAS3-N350VS		1	NVSLPTTK	N[637]VSLPTTK	2	b	2	7	12	GAS3-N350VS	0	FALSE	0	0.99	FALSE	1
662	357.195	12	GAS3-N350VS		1	NVSLPTTK	N[662]VSLPTTK	2	b	2	7	12	GAS3-N350VS	0	FALSE	0	0.99	FALSE	1
687	357.195	12	GAS3-N350VS		1	NVSLPTTK	N[687]VSLPTTK	2	b	2	7	12	GAS3-N350VS	0	FALSE	0	0.99	FALSE	1
712	357.195	12	GAS3-N350VS		1	NVSLPTTK	N[712]VSLPTTK	2	b	2	7	12	GAS3-N350VS	0	FALSE	0	0.99	FALSE	1
737	357.195	12	GAS3-N350VS		1	NVSLPTTK	N[737]VSLPTTK	2	b	2	7	12	GAS3-N350VS	0	FALSE	0	0.99	FALSE	1
762	357.195	12	GAS3-N350VS		1	NVSLPTTK	N[762]VSLPTTK	2	b	2	7	12	GAS3-N350VS	0	FALSE	0	0.99	FALSE	1
787	357.195	12	GAS3-N350VS		1	NVSLPTTK	N[787]VSLPTTK	2	b	2	7	12	GAS3-N350VS	0	FALSE	0	0.99	FALSE	1
812	357.195	12	GAS3-N350VS		1	NVSLPTTK	N[812]VSLPTTK	2	b	2	7	12	GAS3-N350VS	0	FALSE	0	0.99	FALSE	1
837	357.195	12	GAS3-N350VS		1	NVSLPTTK	N[837]VSLPTTK	2	b	2	7	12	GAS3-N350VS	0	FALSE	0	0.99	FALSE	1
862	357.195	12	GAS3-N350VS		1	NVSLPTTK	N[862]VSLPTTK	2	b	2	7	12	GAS3-N350VS	0	FALSE	0	0.99	FALSE	1
887	357.195	12	GAS3-N350VS		1	NVSLPTTK	N[887]VSLPTTK	2	b	2	7	12	GAS3-N350VS	0	FALSE	0	0.99	FALSE	1
912	357.195	12	GAS3-N350VS		1	NVSLPTTK	N[912]VSLPTTK	2	b	2	7	12	GAS3-N350VS	0	FALSE	0	0.99	FALSE	1
937	357.195	12	GAS3-N350VS		1	NVSLPTTK	N[937]VSLPTTK	2	b	2	7	12	GAS3-N350VS	0	FALSE	0	0.99	FALSE	1
962	357.195	12	GAS3-N350VS		1	NVSLPTTK	N[962]VSLPTTK	2	b	2	7	12	GAS3-N350VS	0	FALSE	0	0.99	FALSE	1
987	357.195	12	GAS3-N350VS		1	NVSLPTTK	N[987]VSLPTTK	2	b	2	7	12	GAS3-N350VS	0	FALSE	0	0.99	FALSE	1
1012	357.195	12	GAS3-N350VS		1	NVSLPTTK	N[1012]VSLPTTK	2	b	2	7	12	GAS3-N350VS	0	FALSE	0	0.99	FALSE	1
1037	357.195	12	GAS3-N350VS		1	NVSLPTTK	N[1037]VSLPTTK	2	b	2	7	12	GAS3-N350VS	0	FALSE	0	0.99	FALSE	1
1062	357.195	12	GAS3-N350VS		1	NVSLPTTK	N[1062]VSLPTTK	2	b	2	7	12	GAS3-N350VS	0	FALSE	0	0.99	FALSE	1
1087	357.195	12	GAS3-N350VS		1	NVSLPTTK	N[1087]VSLPTTK	2	b	2	7	12	GAS3-N350VS	0	FALSE	0	0.99	FALSE	1
1112	357.195	12	GAS3-N350VS		1	NVSLPTTK	N[1112]VSLPTTK	2	b	2	7	12	GAS3-N350VS	0	FALSE	0	0.99	FALSE	1
1137	357.195	12	GAS3-N350VS		1	NVSLPTTK	N[1137]VSLPTTK	2	b	2	7	12	GAS3-N350VS	0	FALSE	0	0.99	FALSE	1
1162	357.195	12	GAS3-N350VS		1	NVSLPTTK	N[1162]VSLPTTK	2	b	2	7	12	GAS3-N350VS	0	FALSE	0	0.99	FALSE	1
1187	357.195	12	GAS3-N350VS		1	NVSLPTTK	N[1187]VSLPTTK	2	b	2	7	12	GAS3-N350VS	0	FALSE	0	0.99	FALSE	1
1212	357.195	12	GAS3-N350VS		1	NVSLPTTK	N[1212]VSLPTTK	2	b	2	7	12	GAS3-N350VS	0	FALSE	0	0.99	FALSE	1
1237	357.195	12	GAS3-N350VS		1	NVSLPTTK	N[1237]VSLPTTK	2	b	2	7	12	GAS3-N350VS	0	FALSE	0	0.99	FALSE	1
412.5	373.226	12	GAS3-N350VS		1	NVSLPTTK	N[412]VSLPTTK	2	y	2	7	12	GAS3-N350VS	0	FALSE	0	0.99	FALSE	1
437	373.226	12	GAS3-N350VS		1	NVSLPTTK	N[437]VSLPTTK	2	y	2	7	12	GAS3-N350VS	0	FALSE	0	0.99	FALSE	1
462	373.226	12	GAS3-N350VS		1	NVSLPTTK	N[462]VSLPTTK	2	y	2	7	12	GAS3-N350VS	0	FALSE	0	0.99	FALSE	1
487	373.226	12	GAS3-N350VS		1	NVSLPTTK	N[487]VSLPTTK	2	y	2	7	12	GAS3-N350VS	0	FALSE	0	0.99	FALSE	1
512	373.226	12	GAS3-N350VS		1	NVSLPTTK	N[512]VSLPTTK	2	y	2	7	12	GAS3-N350VS	0	FALSE	0	0.99	FALSE	1
537	373.226	12	GAS3-N350VS		1	NVSLPTTK	N[537]VSLPTTK	2	y	2	7	12	GAS3-N350VS	0	FALSE	0	0.99	FALSE	1
562	373.226	12	GAS3-N350VS		1	NVSLPTTK	N[562]VSLPTTK	2	y	2	7	12	GAS3-N350VS	0	FALSE	0	0.99	FALSE	1
587	373.226	12	GAS3-N350VS		1	NVSLPTTK	N[587]VSLPTTK	2	y	2	7	12	GAS3-N350VS	0	FALSE	0	0.99	FALSE	1
612	373.226	12	GAS3-N350VS		1	NVSLPTTK	N[612]VSLPTTK	2	y	2	7	12	GAS3-N350VS	0	FALSE	0	0.99	FALSE	1
637	373.226	12	GAS3-N350VS		1	NVSLPTTK	N[637]VSLPTTK	2	y	2	7	12	GAS3-N350VS	0	FALSE	0	0.99	FALSE	1
662	373.226	12	GAS3-N350VS		1	NVSLPTTK	N[662]VSLPTTK	2	y	2	7	12	GAS3-N350VS	0	FALSE	0	0.99	FALSE	1
687	373.226	12	GAS3-N350VS		1	NVSLPTTK	N[687]VSLPTTK	2	y	2	7	12	GAS3-N350VS	0	FALSE	0	0.99	FALSE	1
712	373.226	12	GAS3-N350VS		1	NVSLPTTK	N[712]VSLPTTK	2	y	2	7	12	GAS3-N350VS	0	FALSE	0	0.99	FALSE	1
737	373.226	12	GAS3-N350VS		1	NVSLPTTK	N[737]VSLPTTK	2	y	2	7	12	GAS3-N350VS	0	FALSE	0	0.99	FALSE	1
762	373.226	12	GAS3-N350VS		1	NVSLPTTK	N[762]VSLPTTK	2	y	2	7	12	GAS3-N350VS	0	FALSE	0	0.99	FALSE	1
787	373.226	12	GAS3-N350VS		1	NVSLPTTK	N[787]VSLPTTK	2	y	2	7	12	GAS3-N350VS	0	FALSE	0	0.99	FALSE	1
812	373.226	12	GAS3-N350VS		1	NVSLPTTK	N[812]VSLPTTK	2	y	2	7	12	GAS3-N350VS	0	FALSE	0	0.99	FALSE	1
837	373.226	12	GAS3-N350VS		1	NVSLPTTK	N[837]VSLPTTK	2	y	2	7	12	GAS3-N350VS	0	FALSE	0	0.99	FALSE	1
862	373.226	12	GAS3-N350VS		1	NVSLPTTK	N[862]VSLPTTK	2	y	2	7	12	GAS3-N350VS	0	FALSE	0	0.99	FALSE	1
887	373.226	12	GAS3-N350VS		1	NVSLPTTK	N[887]VSLPTTK	2	y	2	7	12	GAS3-N350VS	0	FALSE	0	0.99	FALSE	1
912	373.226	12	GAS3-N350VS		1	NVSLPTTK	N[912]VSLPTTK	2	y	2	7	12	GAS3-N350VS	0	FALSE	0	0.99	FALSE	1
937	373.226	12	GAS3-N350VS		1	NVSLPTTK	N[937]VSLPTTK	2	y	2	7	12	GAS3-N350VS	0	FALSE	0	0.99	FALSE	1
962	373.226	12	GAS3-N350VS		1	NVSLPTTK	N[962]VSLPTTK	2	y	2	7	12	GAS3-N350VS	0	FALSE	0	0.99	FALSE	1
987	373.226	12	GAS3-N350VS		1	NVSLPTTK	N[987]VSLPTTK	2	y	2	7	12	GAS3-N350VS	0	FALSE	0	0.99	FALSE	1
1012	373.226	12	GAS3-N350VS		1	NVSLPTTK	N[1012]VSLPTTK	2	y	2	7	12	GAS3-N350VS	0	FALSE	0	0.99	FALSE	1
1037	373.226	12	GAS3-N350VS		1	NVSLPTTK	N[1037]VSLPTTK	2	y	2	7	12	GAS3-N350VS	0	FALSE	0	0.99	FALSE	1
1062	373.226	12	GAS3-N350VS		1	NVSLPTTK	N[1062]VSLPTTK	2	y	2	7	12	GAS3-N350VS	0	FALSE	0	0.99	FALSE	1
1087	373.226	12	GAS3-N350VS		1	NVSLPTTK	N[1087]VSLPTTK	2	y	2	7	12	GAS3-N350VS	0	FALSE	0	0.99	FALSE	1
1112	373.226	12	GAS3-N350VS		1	NVSLPTTK	N[1112]VSLPTTK	2	y	2	7	12	GAS3-N350VS	0	FALSE	0	0.99	FALSE	1
1137	373.226	12	GAS3-N350VS		1	NVSLPTTK	N[1137]VSLPTTK	2	y	2	7	12	GAS3-N350VS	0	FALSE	0	0.99	FALSE	1
1162	373.226	12	GAS3-N350VS		1	NVSLPTTK	N[1162]VSLPTTK	2	y	2	7	12	GAS3-N350VS	0	FALSE	0	0.99	FALSE	1
1187	373.226	12	GAS3-N350VS		1	NVSLPTTK	N[1187]VSLPTTK	2	y	2	7	12	GAS3-N350VS	0	FALSE	0	0.99	FALSE	1
1212	373.226	12	GAS3-N350VS		1	NVSLPTTK	N[1212]VSLPTTK	2	y	2	7	12	GAS3-N350VS	0	FALSE	0	0.99	FALSE	1
1237	373.226	12	GAS3-N350VS		1	NVSLPTTK	N[1237]VSLPTTK	2	y	2	7	12	GAS3-N350VS	0	FALSE	0	0.99	FALSE	1
412.5	841.478	12	GAS3-N350VS		1	NVSLPTTK	N[412]VSLPTTK	2	b	1	8	12	GAS3-N350VS	0	FALSE	0	0.99	FALSE	1
437	841.478	12	GAS3-N350VS		1	NVSLPTTK	N[437]VSLPTTK	2	b	1	8	12	GAS3-N350VS	0	FALSE	0	0.99	FALSE	1
462	841.478	12	GAS3-N350VS		1	NVSLPTTK	N[462]VSLPTTK	2	b	1	8	12	GAS3-N350VS	0	FALSE	0	0.99	FALSE	1
487	841.478	12	GAS3-N350VS		1	NVSLPTTK	N[487]VSLPTTK	2	b	1	8	12	GAS3-N350VS	0	FALSE	0	0.99	FALSE	1
512	841.478	12	GAS3-N350VS		1	NVSLPTTK	N[512]VSLPTTK	2	b	1	8	12	GAS3-N350VS	0	FALSE	0	0.99	FALSE	1
537	841.478	12	GAS3-N350VS		1	NVSLPTTK	N[537]VSLPTTK	2	b	1	8	12	GAS3-N350VS	0	FALSE	0	0.99	FALSE	1
562	841.478	12	GAS3-N350VS		1	NVSLPTTK	N[562]VSLPTTK	2	b	1	8	12	GAS3-N350VS	0	FALSE	0	0.99	FALSE	1
587	841.478	12	GAS3-N350VS		1	NVSLPTTK	N[587]VSLPTTK	2	b	1	8	12	GAS3-N350VS	0	FALSE	0	0.99	FALSE	1
612	841.478	12	GAS3-N350VS		1	NVSLPTTK	N[612]VSLPTTK	2	b	1	8	12	GAS3-N350VS	0	FALSE	0	0.99	FALSE	1
637	841.478	12	GAS3-N350VS		1	NVSLPTTK	N[637]VSLPTTK	2	b	1	8	12	GAS3-N350VS	0	FALSE	0	0.99	FALSE	1
662	841.478	12	GAS3-N350VS		1	NVSLPTTK	N[662]VSLPTTK	2	b	1	8	12	GAS3-N350VS	0	FALSE	0	0.99	FALSE	1
687	841.478	12	GAS3-N350VS		1	NVSLPTTK	N[687]VSLPTTK	2	b	1	8	12	GAS3-N350VS	0	FALSE	0	0.99	FALSE	1
712	841.478	12	GAS3-N350VS		1	NVSLPTTK	N[712]VSLPTTK	2	b	1	8	12	GAS3-N350VS	0	FALSE	0	0.99	FALSE	1
737	841.478	12	GAS3-N350VS		1	NVSLPTTK	N[737]VSLPTTK	2	b	1	8	12	GAS3-N350VS	0	FALSE	0	0.99	FALSE	1
762	841.478	12	GAS3-N350VS		1	NVSLPTTK	N[762]VSLPTTK	2	b	1	8	12	GAS3-N350VS	0	FALSE	0	0.99	FALSE	1
787	841.478	12	GAS3-N350VS		1	NVSLPTTK	N[787]VSLPTTK	2	b	1	8	12	GAS3-N350VS	0	FALSE	0	0.99	FALSE	1
812	841.478	12	GAS3-N350VS		1	NVSLPTTK	N[812]VSLPTTK	2	b	1	8	12	GAS3-N350VS	0	FALSE	0	0.99	FALSE	1
837	841.478	12	GAS3-N350VS		1	NVSLPTTK	N[837]VSLPTTK	2	b	1	8	12	GAS3-N350VS	0	FALSE	0	0.99	FALSE	1
862	841.478	12	GAS3-N350VS		1	NVSLPTTK	N[862]VSLPTTK	2	b	1	8	12	GAS3-N350VS	0	FALSE	0	0.99	FALSE	1
887	841.478	12	GAS3-N350VS		1	NVSLPTTK	N[887]VSLPTTK	2	b	1	8	12	GAS3-N350VS	0	FALSE	0	0.99	FALSE	1
912	841.478	12	GAS3-N350VS		1	NVSLPTTK	N[912]VSLPTTK	2	b	1	8	12	GAS3-N350VS	0	FALSE	0	0.99	FALSE	1
937	841.478	12	GAS3-N350VS		1	NVSLPTTK	N[937]VSLPTTK	2	b	1	8	12	GAS3-N350VS	0	FALSE	0	0.99	FALSE	1
962	841.478	12	GAS3-N350VS		1	NVSLPTTK	N[962]VSLPTTK	2	b	1	8	12	GAS3-N350VS	0	FALSE	0	0.99	FALSE	1
987	841.478	12	GAS3-N350VS		1	NVSLPTTK	N[987]VSLPTTK	2	b	1	8	12	GAS3-N350VS	0	FALSE	0	0.99	FALSE	1
1012	841.478	12	GAS3-N350VS		1	NVSLPTTK	N[1012]VSLPTTK	2	b	1	8	12	GAS3-N350VS	0	FALSE	0	0.99	FALSE	1
1037	841.478	12	GAS3-N350VS		1	NVSLPTTK	N[1037]VSLPTTK	2	b	1	8	12	GAS3-N350VS	0	FALSE	0	0.99	FALSE	1
1062	841.478	12	GAS3-N350VS		1	NVSLPTTK	N[1062]VSLPTTK	2	b	1	8	12	GAS3-N350VS	0	FALSE	0	0.99	FALSE	1
1087	841.478	12	GAS3-N350VS		1	NVSLPTTK	N[1087]VSLPTTK	2	b	1	8	12	GAS3-N350VS	0	FALSE	0	0.99	FALSE	1
1112	841.478	12	GAS3-N350VS		1	NVSLPTTK	N[1112]VSLPTTK	2	b	1	8	12	GAS3-N350VS	0	FALSE	0	0.99	FALSE	1
1137	841.478	12	GAS3-N350VS		1	NVSLPTTK	N[1137]VSLPTTK	2	b	1	8	12	GAS3-N350VS	0	FALSE	0	0.99	FALSE	1
1162	841.478	12	GAS3-N350VS		1	NVSLPTTK	N[1162]VSLPTTK	2	b	1	8	12	GAS3-N350VS	0	FALSE	0	0.99	FALSE	1
1187	841.478	12	GAS3-N350VS		1	NVSLPTTK	N[1187]VSLPTTK	2	b	1	8	12	GAS3-N350VS	0	FALSE	0	0.99	FALSE	1
1212	841.478	12	GAS3-N350VS		1	NVSLPTTK	N[1212]VSLPTTK	2	b	1	8	12	GAS3-N350VS	0	FALSE	0	0.99	FALSE	1
1237	841.478	12	GAS3-N350VS		1	NVSLPTTK	N[1237]VSLPTTK	2	b	1	8	12	GAS3-N350VS	0	FALSE	0	0.99	FALSE	1
412.5	421.243	12	GAS3-N350VS		1	NVSLPTTK	N[412]VSLPTTK	2	b	2	8	12	GAS3-N350VS	0	FALSE	0	0.99	FALSE	1
437	421.243	12	GAS3-N350VS		1	NVSLPTTK	N[437]VSLPTTK	2	b	2	8	12	GAS3-N350VS	0	FALSE	0	0.99	FALSE	1
462	421.243	12	GAS3-N350VS		1	NVSLPTTK	N[462]VSLPTTK	2	b	2	8	12	GAS3-N350VS	0	FALSE	0	0.99	FALSE	1
487	421.243	12	GAS3-N350VS		1	NVSLPTTK	N[487]VSLPTTK	2	b	2	8	12	GAS3-N350VS	0	FALSE	0	0.99	FALSE	1
512	421.243	12	GAS3-N350VS		1	NVSLPTTK	N[512]VSLPTTK	2	b	2	8	12	GAS3-N350VS	0	FALSE	0	0.99	FALSE	1
537	421.243	12	GAS3-N350VS		1	NVSLPTTK	N[537]VSLPTTK	2	b	2	8	12	GAS3-N350VS	0	FALSE	0	0.99	FALSE	1
562	421.243	12	GAS3-N350VS		1	NVSLPTTK	N[562]VSLPTTK	2	b	2	8	12	GAS3-N350VS	0	FALSE	0	0.99	FALSE	1
587	421.243	12	GAS3-N350VS		1	NVSLPTTK	N[587]VSLPTTK	2	b	2	8	12	GAS3-N350VS	0	FALSE	0	0.99	FALSE	1
612	421.243	12	GAS3-N350VS		1	NVSLPTTK	N[612]VSLPTTK	2	b	2	8	12	GAS3-N350VS	0	FALSE	0	0.99	FALSE	1
637	421.243	12	GAS3-N350VS		1	NVSLPTTK	N[637]VSLPTTK	2	b	2	8	12	GAS3-N350VS	0	FALSE	0	0.99	FALSE	1
662	421.243	12	GAS3-N350VS		1	NVSLPTTK	N[662]VSLPTTK	2	b	2	8	12	GAS3-N350VS	0	FALSE	0	0.99	FALSE	1
687	421.243	12	GAS3-N350VS		1	NVSLPTTK	N[687]VSLPTTK	2	b	2	8	12	GAS3-N350VS	0	FALSE	0	0.99	FALSE	1
712	421.243	12	GAS3-N350VS		1	NVSLPTTK	N[712]VSLPTTK	2	b	2	8	12	GAS3-N350VS	0	FALSE	0	0.99	FALSE	1
737	421.243	12	GAS3-N350VS		1	NVSLPTTK	N[737]VSLPTTK	2	b	2	8	12	GAS3-N350VS	0	FALSE	0	0.99	FALSE	1
762	421.243	12	GAS3-N350VS		1	NVSLPTTK	N[762]VSLPTTK	2	b	2	8	12	GAS3-N350VS	0	FALSE	0	0.99	FALSE	1
787	421.243	12	GAS3-N350VS		1	NVSLPTTK	N[787]VSLPTTK	2	b	2	8	12	GAS3-N350VS	0	FALSE	0	0.99	FALSE	1
812	421.243	12	GAS3-N350VS		1	NVSLPTTK	N[812]VSLPTTK	2	b	2	8	12	GAS3-N350VS	0	FALSE	0	0.99	FALSE	1
837	421.243	12	GAS3-N350VS		1	NVSLPTTK	N[837]VSLPTTK	2	b	2	8	12	GAS3-N350VS	0	FALSE	0	0.99	FALSE	1
862	421.243	12	GAS3-N350VS		1	NVSLPTTK	N[862]VSLPTTK	2	b	2	8	12	GAS3-N350VS	0	FALSE	0	0.99	FALSE	1
887	421.243	12	GAS3-N350VS		1	NVSLPTTK	N[887]VSLPTTK	2	b	2	8	12	GAS3-N350VS	0	FALSE	0	0.99	FALSE	1
912	421.243	12	GAS3-N350VS		1	NVSLPTTK	N[912]VSLPTTK	2	b	2	8	12	GAS3-N350VS	0	FALSE	0	0.99	FALSE	1
937	421.243	12	GAS3-N350VS		1	NVSLPTTK	N[937]VSLPTTK	2	b	2	8	12	GAS3-N350VS	0	FALSE	0	0.99	FALSE	1
962	421.243	12	GAS3-N350VS		1	NVSLPTTK	N[962]VSLPTTK	2	b	2	8	12	GAS3-N350VS	0	FALSE	0	0.99	FALSE	1
987	421.243	12	GAS3-N350VS		1	NVSLPTTK	N[987]VSLPTTK	2	b	2	8	12	GAS3-N350VS	0	FALSE	0	0.99	FALSE	1
1012	421.243	12	GAS3-N350VS		1	NVSLPTTK	N[1012]VSLPTTK	2	b	2	8	12	GAS3-N350VS	0	FALSE	0	0.99	FALSE	1
1037	421.243	12	GAS3-N350VS		1	NVSLPTTK	N[1037]VSLPTTK	2	b	2	8	12	GAS3-N350VS	0	FALSE	0	0.99	FALSE	1
1062	421.243	12	GAS3-N350VS		1	NVSLPTTK	N[1062]VSLPTTK	2	b	2	8	12	GAS3-N350VS	0	FALSE	0	0.99	FALSE	1
1087	421.243	12	GAS3-N350VS		1	NVSLPTTK	N[1087]VSLPTTK	2	b	2	8	12	GAS3-N350VS	0	FALSE	0	0.99	FALSE	1
1112	421.243	12	GAS3-N350VS		1	NVSLPTTK	N[1112]VSLPTTK	2	b	2	8	12	GAS3-N350VS	0	FALSE	0	0.99	FALSE	1
1137	421.243	12	GAS3-N350VS		1	NVSLPTTK	N[1137]VSLPTTK	2	b	2	8	12	GAS3-N350VS	0	FALSE	0	0.99	FALSE	1
1162	421.243	12	GAS3-N350VS		1	NVSLPTTK	N[1162]VSLPTTK	2	b	2	8	12	GAS3-N350VS	0	FALSE	0	0.99	FALSE	1
1187	421.243	12	GAS3-N350VS		1	NVSLPTTK	N[1187]VSLPTTK	2	b	2	8	12	GAS3-N350VS	0	FALSE	0	0.99	FALSE	1
1212	421.243	12	GAS3-N350VS		1	NVSLPTTK	N[1212]VSLPTTK	2	b	2	8	12	GAS3-N350VS	0	FALSE	0	0.99	FALSE	1
1237	421.243	12	GAS3-N350VS		1	NVSLPTTK	N[1237]VSLPTTK	2	b	2	8	12	GAS3-N350VS	0	FALSE	0	0.99	FALSE	1
412.5	1062.57	12	GAS3-N350VS		1	NVSLPTTK	N[412]VSLPTTK	2	Y	1	2	12	GAS3-N350VS	0	FALSE	0	0.99	FALSE	1
437	1062.57	12	GAS3-N350VS		1	NVSLPTTK	N[437]VSLPTTK	2	Y	1	2	12	GAS3-N350VS	0	FALSE	0	0.99	FALSE	1
462	1062.57	12	GAS3-N350VS		1	NVSLPTTK	N[462]VSLPTTK	2	Y	1	2	12	GAS3-N350VS	0	FALSE	0	0.99	FALSE	1
487	1062.57	12	GAS3-N350VS		1	NVSLPTTK	N[487]VSLPTTK	2	Y	1	2	12	GAS3-N350VS	0	FALSE	0	0.99	FALSE	1
512	1062.57	12	GAS3-N350VS		1	NVSLPTTK	N[512]VSLPTTK	2	Y	1	2	12	GAS3-N350VS	0	FALSE	0	0.99	FALSE	1
537	1062.57	12	GAS3-N350VS		1	NVSLPTTK	N[537]VSLPTTK	2	Y	1	2	12	GAS3-N350VS	0	FALSE	0	0.99	FALSE	1
562	1062.57	12	GAS3-N350VS		1	NVSLPTTK	N[562]VSLPTTK	2	Y	1	2	12	GAS3-N350VS	0	FALSE	0	0.99	FALSE	1
587	1062.57	12	GAS3-N350VS		1	NVSLPTTK	N[587]VSLPTTK	2	Y	1	2	12	GAS3-N350VS	0	FALSE	0	0.99	FALSE	1
612	1062.57	12	GAS3-N350VS		1	NVSLPTTK	N[612]VSLPTTK	2	Y	1	2	12	GAS3-N350VS	0	FALSE	0	0.99	FALSE	1
637	1062.57	12	GAS3-N350VS		1	NVSLPTTK	N[637]VSLPTTK	2	Y	1	2	12	GAS3-N350VS	0	FALSE	0	0.99	FALSE	1
662	1062.57	12	GAS3-N350VS		1	NVSLPTTK	N[662]VSLPTTK	2	Y	1	2	12	GAS3-N350VS	0	FALSE	0	0.99	FALSE	1
687	1062.57	12	GAS3-N350VS		1	NVSLPTTK	N[687]VSLPTTK	2	Y	1	2	12	GAS3-N350VS	0	FALSE	0	0.99	FALSE	1
712	1062.57	12	GAS3-N350VS		1	NVSLPTTK	N[712]VSLPTTK	2	Y	1	2	12	GAS3-N350VS	0	FALSE	0	0.99	FALSE	1
737	1062.57	12	GAS3-N350VS		1	NVSLPTTK	N[737]VSLPTTK	2	Y	1	2	12	GAS3-N350VS	0	FALSE	0	0.99	FALSE	1
762	1062.57	12	GAS3-N350VS		1	NVSLPTTK	N[762]VSLPTTK	2	Y	1	2	12	GAS3-N350VS	0	FALSE	0	0.99	FALSE	1
787	1062.57	12	GAS3-N350VS		1	NVSLPTTK	N[787]VSLPTTK	2	Y	1	2	12	GAS3-N350VS	0	FALSE	0	0.99	FALSE	1
812	1062.57	12	GAS3-N350VS		1	NVSLPTTK	N[812]VSLPTTK	2	Y	1	2	12	GAS3-N350VS	0	FALSE	0	0.99	FALSE	1
837	1062.57	12	GAS3-N350VS		1	NVSLPTTK	N[837]VSLPTTK	2	Y	1	2	12	GAS3-N350VS	0	FALSE	0	0.99	FALSE	1
862	1062.57	12	GAS3-N350VS		1	NVSLPTTK	N[862]VSLPTTK	2	Y	1	2	12	GAS3-N350VS	0	FALSE	0	0.99	FALSE	1
887	1062.57	12	GAS3-N350VS		1	NVSLPTTK	N[887]VSLPTTK	2	Y	1	2	12	GAS3-N350VS	0	FALSE	0	0.99	FALSE	1
912	1062.57	12	GAS3-N350VS		1	NVSLPTTK	N[912]VSLPTTK	2	Y	1	2	12	GAS3-N350VS	0	FALSE	0	0.99	FALSE	1
937	1062.57	12	GAS3-N350VS		1	NVSLPTTK	N[937]VSLPTTK	2	Y	1	2	12	GAS3-N350VS	0	FALSE	0	0.99	FALSE	1
962	1062.57	12	GAS3-N350VS		1	NVSLPTTK	N[962]VSLPTTK	2	Y	1	2	12	GAS3-N350VS	0	FALSE	0	0.99	FALSE	1
987	1062.57	12	GAS3-N350VS		1	NVSLPTTK	N[987]VSLPTTK	2	Y	1	2	12	GAS3-N350VS	0	FALSE	0	0.99	FALSE	1
1012	1062.57	12	GAS3-N350VS		1	NVSLPTTK	N[1012]VSLPTTK	2	Y	1	2	12	GAS3-N350VS	0	FALSE	0	0.99	FALSE	1
1037	1062.57	12	GAS3-N350VS		1	NVSLPTTK	N[1037]VSLPTTK	2	Y	1	2	12	GAS3-N350VS	0	FALSE	0	0.99	FALSE	1
1062	1062.57	12	GAS3-N350VS		1	NVSLPTTK	N[1062]VSLPTTK	2	Y	1	2	12	GAS3-N350VS	0	FALSE	0	0.99	FALSE	1
1087	1062.57	12	GAS3-N350VS		1	NVSLPTTK	N[1087]VSLPTTK	2	Y	1	2	12	GAS3-N350VS	0	FALSE	0	0.99	FALSE	1
1112	1062.57	12	GAS3-N350VS		1	NVSLPTTK	N[1112]VSLPTTK	2	Y	1	2	12	GAS3-N350VS	0	FALSE	0	0.99	FALSE	1
1137	1062.57	12	GAS3-N350VS		1	NVSLPTTK	N[1137]VSLPTTK	2	Y	1	2	12	GAS3-N350VS	0	FALSE	0	0.99	FALSE	1
1162	1062.57	12	GAS3-N350VS		1	NVSLPTTK	N[1162]VSLPTTK	2	Y	1	2	12	GAS3-N350VS	0	FALSE	0	0.99	FALSE	1
1187	1062.57	12	GAS3-N350VS		1	NVSLPTTK	N[1187]VSLPTTK	2	Y	1	2	12	GAS3-N350VS	0	FALSE	0	0.99	FALSE	1
1212	1062.57	12	GAS3-N350VS		1	NVSLPTTK	N[1212]VSLPTTK	2	Y	1	2	12	GAS3-N350VS	0	FALSE	0	0.99	FALSE	1
1237	1062.57	12	GAS3-N350VS		1	NVSLPTTK	N[1237]VSLPTTK	2	Y	1	2	12	GAS3-N350VS	0	FALSE	0	0.99	FALSE	1
412.5	531.788	12	GAS3-N350VS		1	NVSLPTTK	N[412]VSLPTTK	2	Y	2	2	12	GAS3-N350VS	0	FALSE	0	0.99	FALSE	1
437	531.788	12	GAS3-N350VS		1	NVSLPTTK	N[437]VSLPTTK	2	Y	2	2	12	GAS3-N350VS	0	FALSE	0	0.99	FALSE	1
462	531.788	12	GAS3-N350VS		1	NVSLPTTK	N[462]VSLPTTK	2	Y	2	2	12	GAS3-N350VS	0	FALSE	0	0.99	FALSE	1
487	531.788	12	GAS3-N350VS		1	NVSLPTTK	N[487]VSLPTTK	2	Y	2	2	12	GAS3-N350VS	0	FALSE	0	0.99	FALSE	1
512	531.788	12	GAS3-N350VS		1	NVSLPTTK	N[512]VSLPTTK	2	Y	2	2	12	GAS3-N350VS	0	FALSE	0	0.99	FALSE	1
537	531.788	12	GAS3-N350VS		1	NVSLPTTK	N[537]VSLPTTK	2	Y	2	2	12	GAS3-N350VS	0	FALSE	0	0.99	FALSE	1
562	531.788	12	GAS3-N350VS		1	NVSLPTTK	N[562]VSLPTTK	2	Y	2	2	12	GAS3-N350VS	0	FALSE	0	0.99	FALSE	1
587	531.788	12	GAS3-N350VS		1	NVSLPTTK	N[587]VSLPTTK	2	Y	2	2	12	GAS3-N350VS	0	FALSE	0	0.99	FALSE	1
612	531.788	12	GAS3-N350VS		1	NVSLPTTK	N[612]VSLPTTK	2	Y	2	2	12	GAS3-N350VS	0	FALSE	0	0.99	FALSE	1
637	531.788	12	GAS3-N350VS		1	NVSLPTTK	N[637]VSLPTTK	2	Y	2	2	12	GAS3-N350VS	0	FALSE	0	0.99	FALSE	1
662	531.788	12	GAS3-N350VS		1	NVSLPTTK	N[662]VSLPTTK	2	Y	2	2	12	GAS3-N350VS	0	FALSE	0	0.99	FALSE	1
687	531.788	12	GAS3-N350VS		1	NVSLPTTK	N[687]VSLPTTK	2	Y	2	2	12	GAS3-N350VS	0	FALSE	0	0.99	FALSE	1
712	531.788	12	GAS3-N350VS		1	NVSLPTTK	N[712]VSLPTTK	2	Y	2	2	12	GAS3-N350VS	0	FALSE	0	0.99	FALSE	1
737	531.788	12	GAS3-N350VS		1	NVSLPTTK	N[737]VSLPTTK	2	Y	2	2	12	GAS3-N350VS	0	FALSE	0	0.99	FALSE	1
762	531.788	12	GAS3-N350VS		1	NVSLPTTK	N[762]VSLPTTK	2	Y	2	2	12	GAS3-N350VS	0	FALSE	0	0.99	FALSE	1
787	531.788	12	GAS3-N350VS		1	NVSLPTTK	N[787]VSLPTTK	2	Y	2	2	12	GAS3-N350VS	0	FALSE	0	0.99	FALSE	1
812	531.788	12	GAS3-N350VS		1	NVSLPTTK	N[812]VSLPTTK	2	Y	2	2	12	GAS3-N350VS	0	FALSE	0	0.99	FALSE	1
837	531.788	12	GAS3-N350VS		1	NVSLPTTK	N[837]VSLPTTK	2	Y	2	2	12	GAS3-N350VS	0	FALSE	0	0.99	FALSE	1
862	531.788	12	GAS3-N350VS		1	NVSLPTTK	N[862]VSLPTTK	2	Y	2	2	12	GAS3-N350VS	0	FALSE	0	0.99	FALSE	1
887	531.788	12	GAS3-N350VS		1	NVSLPTTK	N[887]VSLPTTK	2	Y	2	2	12	GAS3-N350VS	0	FALSE	0	0.99	FALSE	1
912	531.788	12	GAS3-N350VS		1	NVSLPTTK	N[912]VSLPTTK	2	Y	2	2	12	GAS3-N350VS	0	FALSE	0	0.99	FALSE	1
937	531.788	12	GAS3-N350VS		1	NVSLPTTK	N[937]VSLPTTK	2	Y	2	2	12	GAS3-N350VS	0	FALSE	0	0.99	FALSE	1
962	531.788	12	GAS3-N350VS		1	NVSLPTTK	N[962]VSLPTTK	2	Y	2	2	12	GAS3-N350VS	0	FALSE	0	0.99	FALSE	1
987	531.788	12	GAS3-N350VS		1	NVSLPTTK	N[987]VSLPTTK	2	Y	2	2	12	GAS3-N350VS	0	FALSE	0	0.99	FALSE	1
1012	531.788	12	GAS3-N350VS		1	NVSLPTTK	N[1012]VSLPTTK	2	Y	2	2	12	GAS3-N350VS	0	FALSE	0	0.99	FALSE	1
1037	531.788	12	GAS3-N350VS		1	NVSLPTTK	N[1037]VSLPTTK	2	Y	2	2	12	GAS3-N350VS	0	FALSE	0	0.99	FALSE	1
1062	531.788	12	GAS3-N350VS		1	NVSLPTTK	N[1062]VSLPTTK	2	Y	2	2	12	GAS3-N350VS	0	FALSE	0	0.99	FALSE	1
1087	531.788	12	GAS3-N350VS		1	NVSLPTTK	N[1087]VSLPTTK	2	Y	2	2	12	GAS3-N350VS	0	FALSE	0	0.99	FALSE	1
1112	531.788	12	GAS3-N350VS		1	NVSLPTTK	N[1112]VSLPTTK	2	Y	2	2	12	GAS3-N350VS	0	FALSE	0	0.99	FALSE	1
1137	531.788	12	GAS3-N350VS		1	NVSLPTTK	N[1137]VSLPTTK	2	Y	2	2	12	GAS3-N350VS	0	FALSE	0	0.99	FALSE	1
1162	531.788	12	GAS3-N350VS		1	NVSLPTTK	N[1162]VSLPTTK	2	Y	2	2	12	GAS3-N350VS	0	FALSE	0	0.99	FALSE	1
1187	531.788	12	GAS3-N350VS		1	NVSLPTTK	N[1187]VSLPTTK	2	Y	2	2	12	GAS3-N350VS	0	FALSE	0	0.99	FALSE	1
1212	531.788	12	GAS3-N350VS		1	NVSLPTTK	N[1212]VSLPTTK	2	Y	2	2	12	GAS3-N350VS	0	FALSE	0	0.99	FALSE	1
1237	531.788	12	GAS3-N350VS		1	NVSLPTTK	N[1237]VSLPTTK	2	Y	2	2	12	GAS3-N350VS	0	FALSE	0	0.99	FALSE	1
412.5	1265.65	12	GAS3-N350VS		1	NVSLPTTK	N[412]VSLPTTK	2	Y	1	3	12	GAS3-N350VS	0	FALSE	0	0.99	FALSE	1
437	1265.65	12	GAS3-N350VS		1	NVSLPTTK	N[437]VSLPTTK	2	Y	1	3	12	GAS3-N350VS	0	FALSE	0	0.99	FALSE	1
462	1265.65	12	GAS3-N350VS		1	NVSLPTTK	N[462]VSLPTTK	2	Y	1	3	12	GAS3-N350VS	0	FALSE	0	0.99	FALSE	1
487	1265.65	12	GAS3-N350VS		1	NVSLPTTK	N[487]VSLPTTK	2	Y	1	3	12	GAS3-N350VS	0	FALSE	0	0.99	FALSE	1
512	1265.65	12	GAS3-N350VS		1	NVSLPTTK	N[512]VSLPTTK	2	Y	1	3	12	GAS3-N350VS	0	FALSE	0	0.99	FALSE	1
537	1265.65	12	GAS3-N350VS		1	NVSLPTTK	N[537]VSLPTTK	2	Y	1	3	12	GAS3-N350VS	0	FALSE	0	0.99	FALSE	1
562	1265.65	12	GAS3-N350VS		1	NVSLPTTK	N[562]VSLPTTK	2	Y	1	3	12	GAS3-N350VS	0	FALSE	0	0.99	FALSE	1
587	1265.65	12	GAS3-N350VS		1	NVSLPTTK	N[587]VSLPTTK	2	Y	1	3	12	GAS3-N350VS	0	FALSE	0	0.99	FALSE	1
612	1265.65	12	GAS3-N350VS		1	NVSLPTTK	N[612]VSLPTTK	2	Y	1	3	12	GAS3-N350VS	0	FALSE	0	0.99	FALSE	1
637	1265.65	12	GAS3-N350VS		1	NVSLPTTK	N[637]VSLPTTK	2	Y	1	3	12	GAS3-N350VS	0	FALSE	0	0.99	FALSE	1
662	1265.65	12	GAS3-N350VS		1	NVSLPTTK	N[662]VSLPTTK	2	Y	1	3	12	GAS3-N350VS	0	FALSE	0	0.99	FALSE	1
687	1265.65	12	GAS3-N350VS		1	NVSLPTTK	N[687]VSLPTTK	2	Y	1	3	12	GAS3-N350VS	0	FALSE	0	0.99	FALSE	1
712	1265.65	12	GAS3-N350VS		1	NVSLPTTK	N[712]VSLPTTK	2	Y	1	3	12	GAS3-N350VS	0	FALSE	0	0.99	FALSE	1
737	1265.65	12	GAS3-N350VS		1	NVSLPTTK	N[737]VSLPTTK	2	Y	1	3	12	GAS3-N350VS	0	FALSE	0	0.99	FALSE	1
762	1265.65	12	GAS3-N350VS		1	NVSLPTTK	N[762]VSLPTTK	2	Y	1	3	12	GAS3-N350VS	0	FALSE	0	0.99	FALSE	1
787	1265.65	12	GAS3-N350VS		1	NVSLPTTK	N[787]VSLPTTK	2	Y	1	3	12	GAS3-N350VS	0	FALSE	0	0.99	FALSE	1
812	1265.65	12	GAS3-N350VS		1	NVSLPTTK	N[812]VSLPTTK	2	Y	1	3	12	GAS3-N350VS	0	FALSE	0	0.99	FALSE	1
837	1265.65	12	GAS3-N350VS		1	NVSLPTTK	N[837]VSLPTTK	2	Y	1	3	12	GAS3-N350VS	0	FALSE	0	0.99	FALSE	1
862	1265.65	12	GAS3-N350VS		1	NVSLPTTK	N[862]VSLPTTK	2	Y	1	3	12	GAS3-N350VS	0	FALSE	0	0.99	FALSE	1
887	1265.65	12	GAS3-N350VS		1	NVSLPTTK	N[887]VSLPTTK	2	Y	1	3	12	GAS3-N350VS	0	FALSE	0	0.99	FALSE	1
912	1265.65	12	GAS3-N350VS		1	NVSLPTTK	N[912]VSLPTTK	2	Y	1	3	12	GAS3-N350VS	0	FALSE	0	0.99	FALSE	1
937	1265.65	12	GAS3-N350VS		1	NVSLPTTK	N[937]VSLPTTK	2	Y	1	3	12	GAS3-N350VS	0	FALSE	0	0.99	FALSE	1
962	1265.65	12	GAS3-N350VS		1	NVSLPTTK	N[962]VSLPTTK	2	Y	1	3	12	GAS3-N350VS	0	FALSE	0	0.99	FALSE	1
987	1265.65	12	GAS3-N350VS		1	NVSLPTTK	N[987]VSLPTTK	2	Y	1	3	12	GAS3-N350VS	0	FALSE	0	0.99	FALSE	1
1012	1265.65	12	GAS3-N350VS		1	NVSLPTTK	N[1012]VSLPTTK	2	Y	1	3	12	GAS3-N350VS	0	FALSE	0	0.99	FALSE	1
1037	1265.65	12	GAS3-N350VS		1	NVSLPTTK	N[1037]VSLPTTK	2	Y	1	3	12	GAS3-N350VS	0	FALSE	0	0.99	FALSE	1
1062	1265.65	12	GAS3-N350VS		1	NVSLPTTK	N[1062]VSLPTTK	2	Y	1	3	12	GAS3-N350VS	0	FALSE	0	0.99	FALSE	1
1087	1265.65	12	GAS3-N350VS		1	NVSLPTTK	N[1087]VSLPTTK	2	Y	1	3	12	GAS3-N350VS	0	FALSE	0	0.99	FALSE	1
1112	1265.65	12	GAS3-N350VS		1	NVSLPTTK	N[1112]VSLPTTK	2	Y	1	3	12	GAS3-N350VS	0	FALSE	0	0.99	FALSE	1
1137	1265.65	12	GAS3-N350VS		1	NVSLPTTK	N[1137]VSLPTTK	2	Y	1	3	12	GAS3-N350VS	0	FALSE	0	0.99	FALSE	1
1162	1265.65	12	GAS3-N350VS		1	NVSLPTTK	N[1162]VSLPTTK	2	Y	1	3	12	GAS3-N350VS	0	FALSE	0	0.99	FALSE	1
1187	1265.65	12	GAS3-N350VS		1	NVSLPTTK	N[1187]VSLPTTK	2	Y	1	3	12	GAS3-N350VS	0	FALSE	0	0.99	FALSE	1
1212	1265.65	12	GAS3-N350VS		1	NVSLPTTK	N[1212]VSLPTTK	2	Y	1	3	12	GAS3-N350VS	0	FALSE	0	0.99	FALSE	1
1237	1265.65	12	GAS3-N350VS		1	NVSLPTTK	N[1237]VSLPTTK	2	Y	1	3	12	GAS3-N350VS	0	FALSE	0	0.99	FALSE	1
412.5	633.327	12	GAS3-N350VS		1	NVSLPTTK	N[412]VSLPTTK	2	Y	2	3	12	GAS3-N350VS	0	FALSE	0	0.99	FALSE	1
437	633.327	12	GAS3-N350VS		1	NVSLPTTK	N[437]VSLPTTK	2	Y	2	3	12	GAS3-N350VS	0	FALSE	0	0.99	FALSE	1
462	633.327	12	GAS3-N350VS		1	NVSLPTTK	N[462]VSLPTTK	2	Y	2	3	12	GAS3-N350VS	0	FALSE	0	0.99	FALSE	1
487	633.327	12	GAS3-N350VS		1	NVSLPTTK	N[487]VSLPTTK	2	Y	2	3	12	GAS3-N350VS	0	FALSE	0	0.99	FALSE	1
512	633.327	12	GAS3-N350VS		1	NVSLPTTK	N[512]VSLPTTK	2	Y	2	3	12	GAS3-N350VS	0	FALSE	0	0.99	FALSE	1
537	633.327	12	GAS3-N350VS		1	NVSLPTTK	N[537]VSLPTTK	2	Y	2	3	12	GAS3-N350VS	0	FALSE	0	0.99	FALSE	1
562	633.327	12	GAS3-N350VS		1	NVSLPTTK	N[562]VSLPTTK	2	Y	2	3	12	GAS3-N350VS	0	FALSE	0	0.99	FALSE	1
587	633.327	12	GAS3-N350VS		1	NVSLPTTK	N[587]VSLPTTK	2	Y	2	3	12	GAS3-N350VS	0	FALSE	0	0.99	FALSE	1
612	633.327	12	GAS3-N350VS		1	NVSLPTTK	N[612]VSLPTTK	2	Y	2	3	12	GAS3-N350VS	0	FALSE	0	0.99	FALSE	1
637	633.327	12	GAS3-N350VS		1	NVSLPTTK	N[637]VSLPTTK	2	Y	2	3	12	GAS3-N350VS	0	FALSE	0	0.99	FALSE	1
662	633.327	12	GAS3-N350VS		1	NVSLPTTK	N[662]VSLPTTK	2	Y	2	3	12	GAS3-N350VS	0	FALSE	0	0.99	FALSE	1
687	633.327	12	GAS3-N350VS		1	NVSLPTTK	N[687]VSLPTTK	2	Y	2	3	12	GAS3-N350VS	0	FALSE	0	0.99	FALSE	1
712	633.327	12	GAS3-N350VS		1	NVSLPTTK	N[712]VSLPTTK	2	Y	2	3	12	GAS3-N350VS	0	FALSE	0	0.99	FALSE	1
737	633.327	12	GAS3-N350VS		1	NVSLPTTK	N[737]VSLPTTK	2	Y	2	3	12	GAS3-N350VS	0	FALSE	0	0.99	FALSE	1
762	633.327	12	GAS3-N350VS		1	NVSLPTTK	N[762]VSLPTTK	2	Y	2	3	12	GAS3-N350VS	0	FALSE	0	0.99	FALSE	1
787	633.327	12	GAS3-N350VS		1	NVSLPTTK	N[787]VSLPTTK	2	Y	2	3	12	GAS3-N350VS	0	FALSE	0	0.99	FALSE	1
812	633.327	12	GAS3-N350VS		1	NVSLPTTK	N[812]VSLPTTK	2	Y	2	3	12	GAS3-N350VS	0	FALSE	0	0.99	FALSE	1
837	633.327	12	GAS3-N350VS		1	NVSLPTTK	N[837]VSLPTTK	2	Y	2	3	12	GAS3-N350VS	0	FALSE	0	0.99	FALSE	1
862	633.327	12	GAS3-N350VS		1	NVSLPTTK	N[862]VSLPTTK	2	Y	2	3	12	GAS3-N350VS	0	FALSE	0	0.99	FALSE	1
887	633.327	12	GAS3-N350VS		1	NVSLPTTK	N[887]VSLPTTK	2	Y	2	3	12	GAS3-N350VS	0	FALSE	0	0.99	FALSE	1
912	633.327	12	GAS3-N350VS		1	NVSLPTTK	N[912]VSLPTTK	2	Y	2	3	12	GAS3-N350VS	0	FALSE	0	0.99	FALSE	1
937	633.327	12	GAS3-N350VS		1	NVSLPTTK	N[937]VSLPTTK	2	Y	2	3	12	GAS3-N350VS	0	FALSE	0	0.99	FALSE	1
962	633.327	12	GAS3-N350VS		1	NVSLPTTK	N[962]VSLPTTK	2	Y	2	3	12	GAS3-N350VS	0	FALSE	0	0.99	FALSE	1
987	633.327	12	GAS3-N350VS		1	NVSLPTTK	N[987]VSLPTTK	2	Y	2	3	12	GAS3-N350VS	0	FALSE	0	0.99	FALSE	1
1012	633.327	12	GAS3-N350VS		1	NVSLPTTK	N[1012]VSLPTTK	2	Y	2	3	12	GAS3-N350VS	0	FALSE	0	0.99	FALSE	1
1037	633.327	12	GAS3-N350VS		1	NVSLPTTK	N[1037]VSLPTTK	2	Y	2	3	12	GAS3-N350VS	0	FALSE	0	0.99	FALSE	1
1062	633.327	12	GAS3-N350VS		1	NVSLPTTK	N[1062]VSLPTTK	2	Y	2	3	12	GAS3-N350VS	0	FALSE	0	0.99	FALSE	1
1087	633.327	12	GAS3-N350VS		1	NVSLPTTK	N[1087]VSLPTTK	2	Y	2	3	12	GAS3-N350VS	0	FALSE	0	0.99	FALSE	1
1112	633.327	12	GAS3-N350VS		1	NVSLPTTK	N[1112]VSLPTTK	2	Y	2	3	12	GAS3-N350VS	0	FALSE	0	0.99	FALSE	1
1137	633.327	12	GAS3-N350VS		1	NVSLPTTK	N[1137]VSLPTTK	2	Y	2	3	12	GAS3-N350VS	0	FALSE	0	0.99	FALSE	1
1162	633.327	12	GAS3-N350VS		1	NVSLPTTK	N[1162]VSLPTTK	2	Y	2	3	12	GAS3-N350VS	0	FALSE	0	0.99	FALSE	1
1187	633.327	12	GAS3-N350VS		1	NVSLPTTK	N[1187]VSLPTTK	2	Y	2	3	12	GAS3-N350VS	0	FALSE	0	0.99	FALSE	1
1212	633.327	12	GAS3-N350VS		1	NVSLPTTK	N[1212]VSLPTTK	2	Y	2	3	12	GAS3-N350VS	0	FALSE	0	0.99	FALSE	1
1237	633.327	12	GAS3-N350VS		1	NVSLPTTK	N[1237]VSLPTTK	2	Y	2	3	12	GAS3-N350VS	0	FALSE	0	0.99	FALSE	1
412.5	1540.69	12	CRH1-N177YT		1	FHNYTLDWAMDK	FHN[412]YTLDWAMDK	2	Y	1	1	12	CRH1-N177YT	0	FALSE	0	0.99	FALSE	1
437	1540.69	12	CRH1-N177YT		1	FHNYTLDWAMDK	FHN[437]YTLDWAMDK	2	Y	1	1	12	CRH1-N177YT	0	FALSE	0	0.99	FALSE	1
462	1540.69	12	CRH1-N177YT		1	FHNYTLDWAMDK	FHN[462]YTLDWAMDK	2	Y	1	1	12	CRH1-N177YT	0	FALSE	0	0.99	FALSE	1
487	1540.69	12	CRH1-N177YT		1	FHNYTLDWAMDK	FHN[487]YTLDWAMDK	2	Y	1	1	12	CRH1-N177YT	0	FALSE	0	0.99	FALSE	1
512	1540.69	12	CRH1-N177YT		1	FHNYTLDWAMDK	FHN[512]YTLDWAMDK	2	Y	1	1	12	CRH1-N177YT	0	FALSE	0	0.99	FALSE	1
537	1540.69	12	CRH1-N177YT		1	FHNYTLDWAMDK	FHN[537]YTLDWAMDK	2	Y	1	1	12	CRH1-N177YT	0	FALSE	0	0.99	FALSE	1
562	1540.69	12	CRH1-N177YT		1	FHNYTLDWAMDK	FHN[562]YTLDWAMDK	2	Y	1	1	12	CRH1-N177YT	0	FALSE	0	0.99	FALSE	1
587	1540.69	12	CRH1-N177YT		1	FHNYTLDWAMDK	FHN[587]YTLDWAMDK	2	Y	1	1	12	CRH1-N177YT	0	FALSE	0	0.99	FALSE	1
612	1540.69	12	CRH1-N177YT		1	FHNYTLDWAMDK	FHN[612]YTLDWAMDK	2	Y	1	1	12	CRH1-N177YT	0	FALSE	0	0.99	FALSE	1
637	1540.69	12	CRH1-N177YT		1	FHNYTLDWAMDK	FHN[637]YTLDWAMDK	2	Y	1	1	12	CRH1-N177YT	0	FALSE	0	0.99	FALSE	1
662	1540.69	12	CRH1-N177YT		1	FHNYTLDWAMDK	FHN[662]YTLDWAMDK	2	Y	1	1	12	CRH1-N177YT	0	FALSE	0	0.99	FALSE	1
687	1540.69	12	CRH1-N177YT		1	FHNYTLDWAMDK	FHN[687]YTLDWAMDK	2	Y	1	1	12	CRH1-N177YT	0	FALSE	0	0.99	FALSE	1
712	1540.69	12	CRH1-N177YT		1	FHNYTLDWAMDK	FHN[712]YTLDWAMDK	2	Y	1	1	12	CRH1-N177YT	0	FALSE	0	0.99	FALSE	1
737	1540.69	12	CRH1-N177YT		1	FHNYTLDWAMDK	FHN[737]YTLDWAMDK	2	Y	1	1	12	CRH1-N177YT	0	FALSE	0	0.99	FALSE	1
762	1540.69	12	CRH1-N177YT		1	FHNYTLDWAMDK	FHN[762]YTLDWAMDK	2	Y	1	1	12	CRH1-N177YT	0	FALSE	0	0.99	FALSE	1
787	1540.69	12	CRH1-N177YT		1	FHNYTLDWAMDK	FHN[787]YTLDWAMDK	2	Y	1	1	12	CRH1-N177YT	0	FALSE	0	0.99	FALSE	1
812	1540.69	12	CRH1-N177YT		1	FHNYTLDWAMDK	FHN[812]YTLDWAMDK	2	Y	1	1	12	CRH1-N177YT	0	FALSE	0	0.99	FALSE	1
837	1540.69	12	CRH1-N177YT		1	FHNYTLDWAMDK	FHN[837]YTLDWAMDK	2	Y	1	1	12	CRH1-N177YT	0	FALSE	0	0.99	FALSE	1
862	1540.69	12	CRH1-N177YT		1	FHNYTLDWAMDK	FHN[862]YTLDWAMDK	2	Y	1	1	12	CRH1-N177YT	0	FALSE	0	0.99	FALSE	1
887	1540.69	12	CRH1-N177YT		1	FHNYTLDWAMDK	FHN[887]YTLDWAMDK	2	Y	1	1	12	CRH1-N177YT	0	FALSE	0	0.99	FALSE	1
912	1540.69	12	CRH1-N177YT		1	FHNYTLDWAMDK	FHN[912]YTLDWAMDK	2	Y	1	1	12	CRH1-N177YT	0	FALSE	0	0.99	FALSE	1
937	1540.69	12	CRH1-N177YT		1	FHNYTLDWAMDK	FHN[937]YTLDWAMDK	2	Y	1	1	12	CRH1-N177YT	0	FALSE	0	0.99	FALSE	1
962	1540.69	12	CRH1-N177YT		1	FHNYTLDWAMDK	FHN[962]YTLDWAMDK	2	Y	1	1	12	CRH1-N177YT	0	FALSE	0	0.99	FALSE	1
987	1540.69	12	CRH1-N177YT		1	FHNYTLDWAMDK	FHN[987]YTLDWAMDK	2	Y	1	1	12	CRH1-N177YT	0	FALSE	0	0.99	FALSE	1
1012	1540.69	12	CRH1-N177YT		1	FHNYTLDWAMDK	FHN[1012]YTLDWAMDK	2	Y	1	1	12	CRH1-N177YT	0	FALSE	0	0.99	FALSE	1
1037	1540.69	12	CRH1-N177YT		1	FHNYTLDWAMDK	FHN[1037]YTLDWAMDK	2	Y	1	1	12	CRH1-N177YT	0	FALSE	0	0.99	FALSE	1
1062	1540.69	12	CRH1-N177YT		1	FHNYTLDWAMDK	FHN[1062]YTLDWAMDK	2	Y	1	1	12	CRH1-N177YT	0	FALSE	0	0.99	FALSE	1
1087	1540.69	12	CRH1-N177YT		1	FHNYTLDWAMDK	FHN[1087]YTLDWAMDK	2	Y	1	1	12	CRH1-N177YT	0	FALSE	0	0.99	FALSE	1
1112	1540.69	12	CRH1-N177YT		1	FHNYTLDWAMDK	FHN[1112]YTLDWAMDK	2	Y	1	1	12	CRH1-N177YT	0	FALSE	0	0.99	FALSE	1
1137	1540.69	12	CRH1-N177YT		1	FHNYTLDWAMDK	FHN[1137]YTLDWAMDK	2	Y	1	1	12	CRH1-N177YT	0	FALSE	0	0.99	FALSE	1
1162	1540.69	12	CRH1-N177YT		1	FHNYTLDWAMDK	FHN[1162]YTLDWAMDK	2	Y	1	1	12	CRH1-N177YT	0	FALSE	0	0.99	FALSE	1
1187	1540.69	12	CRH1-N177YT		1	FHNYTLDWAMDK	FHN[1187]YTLDWAMDK	2	Y	1	1	12	CRH1-N177YT	0	FALSE	0	0.99	FALSE	1
1212	1540.69	12	CRH1-N177YT		1	FHNYTLDWAMDK	FHN[1212]YTLDWAMDK	2	Y	1	1	12	CRH1-N177YT	0	FALSE	0	0.99	FALSE	1
1237	1540.69	12	CRH1-N177YT		1	FHNYTLDWAMDK	FHN[1237]YTLDWAMDK	2	Y	1	1	12	CRH1-N177YT	0	FALSE	0	0.99	FALSE	1
412.5	770.848	12	CRH1-N177YT		1	FHNYTLDWAMDK	FHN[412]YTLDWAMDK	2	Y	2	1	12	CRH1-N177YT	0	FALSE	0	0.99	FALSE	1
437	770.848	12	CRH1-N177YT		1	FHNYTLDWAMDK	FHN[437]YTLDWAMDK	2	Y	2	1	12	CRH1-N177YT	0	FALSE	0	0.99	FALSE	1
462	770.848	12	CRH1-N177YT		1	FHNYTLDWAMDK	FHN[462]YTLDWAMDK	2	Y	2	1	12	CRH1-N177YT	0	FALSE	0	0.99	FALSE	1
487	770.848	12	CRH1-N177YT		1	FHNYTLDWAMDK	FHN[487]YTLDWAMDK	2	Y	2	1	12	CRH1-N177YT	0	FALSE	0	0.99	FALSE	1
512	770.848	12	CRH1-N177YT		1	FHNYTLDWAMDK	FHN[512]YTLDWAMDK	2	Y	2	1	12	CRH1-N177YT	0	FALSE	0	0.99	FALSE	1
537	770.848	12	CRH1-N177YT		1	FHNYTLDWAMDK	FHN[537]YTLDWAMDK	2	Y	2	1	12	CRH1-N177YT	0	FALSE	0	0.99	FALSE	1
562	770.848	12	CRH1-N177YT		1	FHNYTLDWAMDK	FHN[562]YTLDWAMDK	2	Y	2	1	12	CRH1-N177YT	0	FALSE	0	0.99	FALSE	1
587	770.848	12	CRH1-N177YT		1	FHNYTLDWAMDK	FHN[587]YTLDWAMDK	2	Y	2	1	12	CRH1-N177YT	0	FALSE	0	0.99	FALSE	1
612	770.848	12	CRH1-N177YT		1	FHNYTLDWAMDK	FHN[612]YTLDWAMDK	2	Y	2	1	12	CRH1-N177YT	0	FALSE	0	0.99	FALSE	1
637	770.848	12	CRH1-N177YT		1	FHNYTLDWAMDK	FHN[637]YTLDWAMDK	2	Y	2	1	12	CRH1-N177YT	0	FALSE	0	0.99	FALSE	1
662	770.848	12	CRH1-N177YT		1	FHNYTLDWAMDK	FHN[662]YTLDWAMDK	2	Y	2	1	12	CRH1-N177YT	0	FALSE	0	0.99	FALSE	1
687	770.848	12	CRH1-N177YT		1	FHNYTLDWAMDK	FHN[687]YTLDWAMDK	2	Y	2	1	12	CRH1-N177YT	0	FALSE	0	0.99	FALSE	1
712	770.848	12	CRH1-N177YT		1	FHNYTLDWAMDK	FHN[712]YTLDWAMDK	2	Y	2	1	12	CRH1-N177YT	0	FALSE	0	0.99	FALSE	1
737	770.848	12	CRH1-N177YT		1	FHNYTLDWAMDK	FHN[737]YTLDWAMDK	2	Y	2	1	12	CRH1-N177YT	0	FALSE	0	0.99	FALSE	1
762	770.848	12	CRH1-N177YT		1	FHNYTLDWAMDK	FHN[762]YTLDWAMDK	2	Y	2	1	12	CRH1-N177YT	0	FALSE	0	0.99	FALSE	1
787	770.848	12	CRH1-N177YT		1	FHNYTLDWAMDK	FHN[787]YTLDWAMDK	2	Y	2	1	12	CRH1-N177YT	0	FALSE	0	0.99	FALSE	1
812	770.848	12	CRH1-N177YT		1	FHNYTLDWAMDK	FHN[812]YTLDWAMDK	2	Y	2	1	12	CRH1-N177YT	0	FALSE	0	0.99	FALSE	1
837	770.848	12	CRH1-N177YT		1	FHNYTLDWAMDK	FHN[837]YTLDWAMDK	2	Y	2	1	12	CRH1-N177YT	0	FALSE	0	0.99	FALSE	1
862	770.848	12	CRH1-N177YT		1	FHNYTLDWAMDK	FHN[862]YTLDWAMDK	2	Y	2	1	12	CRH1-N177YT	0	FALSE	0	0.99	FALSE	1
887	770.848	12	CRH1-N177YT		1	FHNYTLDWAMDK	FHN[887]YTLDWAMDK	2	Y	2	1	12	CRH1-N177YT	0	FALSE	0	0.99	FALSE	1
912	770.848	12	CRH1-N177YT		1	FHNYTLDWAMDK	FHN[912]YTLDWAMDK	2	Y	2	1	12	CRH1-N177YT	0	FALSE	0	0.99	FALSE	1
937	770.848	12	CRH1-N177YT		1	FHNYTLDWAMDK	FHN[937]YTLDWAMDK	2	Y	2	1	12	CRH1-N177YT	0	FALSE	0	0.99	FALSE	1
962	770.848	12	CRH1-N177YT		1	FHNYTLDWAMDK	FHN[962]YTLDWAMDK	2	Y	2	1	12	CRH1-N177YT	0	FALSE	0	0.99	FALSE	1
987	770.848	12	CRH1-N177YT		1	FHNYTLDWAMDK	FHN[987]YTLDWAMDK	2	Y	2	1	12	CRH1-N177YT	0	FALSE	0	0.99	FALSE	1
1012	770.848	12	CRH1-N177YT		1	FHNYTLDWAMDK	FHN[1012]YTLDWAMDK	2	Y	2	1	12	CRH1-N177YT	0	FALSE	0	0.99	FALSE	1
1037	770.848	12	CRH1-N177YT		1	FHNYTLDWAMDK	FHN[1037]YTLDWAMDK	2	Y	2	1	12	CRH1-N177YT	0	FALSE	0	0.99	FALSE	1
1062	770.848	12	CRH1-N177YT		1	FHNYTLDWAMDK	FHN[1062]YTLDWAMDK	2	Y	2	1	12	CRH1-N177YT	0	FALSE	0	0.99	FALSE	1
1087	770.848	12	CRH1-N177YT		1	FHNYTLDWAMDK	FHN[1087]YTLDWAMDK	2	Y	2	1	12	CRH1-N177YT	0	FALSE	0	0.99	FALSE	1
1112	770.848	12	CRH1-N177YT		1	FHNYTLDWAMDK	FHN[1112]YTLDWAMDK	2	Y	2	1	12	CRH1-N177YT	0	FALSE	0	0.99	FALSE	1
1137	770.848	12	CRH1-N177YT		1	FHNYTLDWAMDK	FHN[1137]YTLDWAMDK	2	Y	2	1	12	CRH1-N177YT	0	FALSE	0	0.99	FALSE	1
1162	770.848	12	CRH1-N177YT		1	FHNYTLDWAMDK	FHN[1162]YTLDWAMDK	2	Y	2	1	12	CRH1-N177YT	0	FALSE	0	0.99	FALSE	1
1187	770.848	12	CRH1-N177YT		1	FHNYTLDWAMDK	FHN[1187]YTLDWAMDK	2	Y	2	1	12	CRH1-N177YT	0	FALSE	0	0.99	FALSE	1
1212	770.848	12	CRH1-N177YT		1	FHNYTLDWAMDK	FHN[1212]YTLDWAMDK	2	Y	2	1	12	CRH1-N177YT	0	FALSE	0	0.99	FALSE	1
1237	770.848	12	CRH1-N177YT		1	FHNYTLDWAMDK	FHN[1237]YTLDWAMDK	2	Y	2	1	12	CRH1-N177YT	0	FALSE	0	0.99	FALSE	1
412.5	285.135	12	CRH1-N177YT		1	FHNYTLDWAMDK	FHN[412]YTLDWAMDK	2	b	1	2	12	CRH1-N177YT	0	FALSE	0	0.99	FALSE	1
437	285.135	12	CRH1-N177YT		1	FHNYTLDWAMDK	FHN[437]YTLDWAMDK	2	b	1	2	12	CRH1-N177YT	0	FALSE	0	0.99	FALSE	1
462	285.135	12	CRH1-N177YT		1	FHNYTLDWAMDK	FHN[462]YTLDWAMDK	2	b	1	2	12	CRH1-N177YT	0	FALSE	0	0.99	FALSE	1
487	285.135	12	CRH1-N177YT		1	FHNYTLDWAMDK	FHN[487]YTLDWAMDK	2	b	1	2	12	CRH1-N177YT	0	FALSE	0	0.99	FALSE	1
512	285.135	12	CRH1-N177YT		1	FHNYTLDWAMDK	FHN[512]YTLDWAMDK	2	b	1	2	12	CRH1-N177YT	0	FALSE	0	0.99	FALSE	1
537	285.135	12	CRH1-N177YT		1	FHNYTLDWAMDK	FHN[537]YTLDWAMDK	2	b	1	2	12	CRH1-N177YT	0	FALSE	0	0.99	FALSE	1
562	285.135	12	CRH1-N177YT		1	FHNYTLDWAMDK	FHN[562]YTLDWAMDK	2	b	1	2	12	CRH1-N177YT	0	FALSE	0	0.99	FALSE	1
587	285.135	12	CRH1-N177YT		1	FHNYTLDWAMDK	FHN[587]YTLDWAMDK	2	b	1	2	12	CRH1-N177YT	0	FALSE	0	0.99	FALSE	1
612	285.135	12	CRH1-N177YT		1	FHNYTLDWAMDK	FHN[612]YTLDWAMDK	2	b	1	2	12	CRH1-N177YT	0	FALSE	0	0.99	FALSE	1
637	285.135	12	CRH1-N177YT		1	FHNYTLDWAMDK	FHN[637]YTLDWAMDK	2	b	1	2	12	CRH1-N177YT	0	FALSE	0	0.99	FALSE	1
662	285.135	12	CRH1-N177YT		1	FHNYTLDWAMDK	FHN[662]YTLDWAMDK	2	b	1	2	12	CRH1-N177YT	0	FALSE	0	0.99	FALSE	1
687	285.135	12	CRH1-N177YT		1	FHNYTLDWAMDK	FHN[687]YTLDWAMDK	2	b	1	2	12	CRH1-N177YT	0	FALSE	0	0.99	FALSE	1
712	285.135	12	CRH1-N177YT		1	FHNYTLDWAMDK	FHN[712]YTLDWAMDK	2	b	1	2	12	CRH1-N177YT	0	FALSE	0	0.99	FALSE	1
737	285.135	12	CRH1-N177YT		1	FHNYTLDWAMDK	FHN[737]YTLDWAMDK	2	b	1	2	12	CRH1-N177YT	0	FALSE	0	0.99	FALSE	1
762	285.135	12	CRH1-N177YT		1	FHNYTLDWAMDK	FHN[762]YTLDWAMDK	2	b	1	2	12	CRH1-N177YT	0	FALSE	0	0.99	FALSE	1
787	285.135	12	CRH1-N177YT		1	FHNYTLDWAMDK	FHN[787]YTLDWAMDK	2	b	1	2	12	CRH1-N177YT	0	FALSE	0	0.99	FALSE	1
812	285.135	12	CRH1-N177YT		1	FHNYTLDWAMDK	FHN[812]YTLDWAMDK	2	b	1	2	12	CRH1-N177YT	0	FALSE	0	0.99	FALSE	1
837	285.135	12	CRH1-N177YT		1	FHNYTLDWAMDK	FHN[837]YTLDWAMDK	2	b	1	2	12	CRH1-N177YT	0	FALSE	0	0.99	FALSE	1
862	285.135	12	CRH1-N177YT		1	FHNYTLDWAMDK	FHN[862]YTLDWAMDK	2	b	1	2	12	CRH1-N177YT	0	FALSE	0	0.99	FALSE	1
887	285.135	12	CRH1-N177YT		1	FHNYTLDWAMDK	FHN[887]YTLDWAMDK	2	b	1	2	12	CRH1-N177YT	0	FALSE	0	0.99	FALSE	1
912	285.135	12	CRH1-N177YT		1	FHNYTLDWAMDK	FHN[912]YTLDWAMDK	2	b	1	2	12	CRH1-N177YT	0	FALSE	0	0.99	FALSE	1
937	285.135	12	CRH1-N177YT		1	FHNYTLDWAMDK	FHN[937]YTLDWAMDK	2	b	1	2	12	CRH1-N177YT	0	FALSE	0	0.99	FALSE	1
962	285.135	12	CRH1-N177YT		1	FHNYTLDWAMDK	FHN[962]YTLDWAMDK	2	b	1	2	12	CRH1-N177YT	0	FALSE	0	0.99	FALSE	1
987	285.135	12	CRH1-N177YT		1	FHNYTLDWAMDK	FHN[987]YTLDWAMDK	2	b	1	2	12	CRH1-N177YT	0	FALSE	0	0.99	FALSE	1
1012	285.135	12	CRH1-N177YT		1	FHNYTLDWAMDK	FHN[1012]YTLDWAMDK	2	b	1	2	12	CRH1-N177YT	0	FALSE	0	0.99	FALSE	1
1037	285.135	12	CRH1-N177YT		1	FHNYTLDWAMDK	FHN[1037]YTLDWAMDK	2	b	1	2	12	CRH1-N177YT	0	FALSE	0	0.99	FALSE	1
1062	285.135	12	CRH1-N177YT		1	FHNYTLDWAMDK	FHN[1062]YTLDWAMDK	2	b	1	2	12	CRH1-N177YT	0	FALSE	0	0.99	FALSE	1
1087	285.135	12	CRH1-N177YT		1	FHNYTLDWAMDK	FHN[1087]YTLDWAMDK	2	b	1	2	12	CRH1-N177YT	0	FALSE	0	0.99	FALSE	1
1112	285.135	12	CRH1-N177YT		1	FHNYTLDWAMDK	FHN[1112]YTLDWAMDK	2	b	1	2	12	CRH1-N177YT	0	FALSE	0	0.99	FALSE	1
1137	285.135	12	CRH1-N177YT		1	FHNYTLDWAMDK	FHN[1137]YTLDWAMDK	2	b	1	2	12	CRH1-N177YT	0	FALSE	0	0.99	FALSE	1
1162	285.135	12	CRH1-N177YT		1	FHNYTLDWAMDK	FHN[1162]YTLDWAMDK	2	b	1	2	12	CRH1-N177YT	0	FALSE	0	0.99	FALSE	1
1187	285.135	12	CRH1-N177YT		1	FHNYTLDWAMDK	FHN[1187]YTLDWAMDK	2	b	1	2	12	CRH1-N177YT	0	FALSE	0	0.99	FALSE	1
1212	285.135	12	CRH1-N177YT		1	FHNYTLDWAMDK	FHN[1212]YTLDWAMDK	2	b	1	2	12	CRH1-N177YT	0	FALSE	0	0.99	FALSE	1
1237	285.135	12	CRH1-N177YT		1	FHNYTLDWAMDK	FHN[1237]YTLDWAMDK	2	b	1	2	12	CRH1-N177YT	0	FALSE	0	0.99	FALSE	1
412.5	262.14	12	CRH1-N177YT		1	FHNYTLDWAMDK	FHN[412]YTLDWAMDK	2	y	1	2	12	CRH1-N177YT	0	FALSE	0	0.99	FALSE	1
437	262.14	12	CRH1-N177YT		1	FHNYTLDWAMDK	FHN[437]YTLDWAMDK	2	y	1	2	12	CRH1-N177YT	0	FALSE	0	0.99	FALSE	1
462	262.14	12	CRH1-N177YT		1	FHNYTLDWAMDK	FHN[462]YTLDWAMDK	2	y	1	2	12	CRH1-N177YT	0	FALSE	0	0.99	FALSE	1
487	262.14	12	CRH1-N177YT		1	FHNYTLDWAMDK	FHN[487]YTLDWAMDK	2	y	1	2	12	CRH1-N177YT	0	FALSE	0	0.99	FALSE	1
512	262.14	12	CRH1-N177YT		1	FHNYTLDWAMDK	FHN[512]YTLDWAMDK	2	y	1	2	12	CRH1-N177YT	0	FALSE	0	0.99	FALSE	1
537	262.14	12	CRH1-N177YT		1	FHNYTLDWAMDK	FHN[537]YTLDWAMDK	2	y	1	2	12	CRH1-N177YT	0	FALSE	0	0.99	FALSE	1
562	262.14	12	CRH1-N177YT		1	FHNYTLDWAMDK	FHN[562]YTLDWAMDK	2	y	1	2	12	CRH1-N177YT	0	FALSE	0	0.99	FALSE	1
587	262.14	12	CRH1-N177YT		1	FHNYTLDWAMDK	FHN[587]YTLDWAMDK	2	y	1	2	12	CRH1-N177YT	0	FALSE	0	0.99	FALSE	1
612	262.14	12	CRH1-N177YT		1	FHNYTLDWAMDK	FHN[612]YTLDWAMDK	2	y	1	2	12	CRH1-N177YT	0	FALSE	0	0.99	FALSE	1
637	262.14	12	CRH1-N177YT		1	FHNYTLDWAMDK	FHN[637]YTLDWAMDK	2	y	1	2	12	CRH1-N177YT	0	FALSE	0	0.99	FALSE	1
662	262.14	12	CRH1-N177YT		1	FHNYTLDWAMDK	FHN[662]YTLDWAMDK	2	y	1	2	12	CRH1-N177YT	0	FALSE	0	0.99	FALSE	1
687	262.14	12	CRH1-N177YT		1	FHNYTLDWAMDK	FHN[687]YTLDWAMDK	2	y	1	2	12	CRH1-N177YT	0	FALSE	0	0.99	FALSE	1
712	262.14	12	CRH1-N177YT		1	FHNYTLDWAMDK	FHN[712]YTLDWAMDK	2	y	1	2	12	CRH1-N177YT	0	FALSE	0	0.99	FALSE	1
737	262.14	12	CRH1-N177YT		1	FHNYTLDWAMDK	FHN[737]YTLDWAMDK	2	y	1	2	12	CRH1-N177YT	0	FALSE	0	0.99	FALSE	1
762	262.14	12	CRH1-N177YT		1	FHNYTLDWAMDK	FHN[762]YTLDWAMDK	2	y	1	2	12	CRH1-N177YT	0	FALSE	0	0.99	FALSE	1
787	262.14	12	CRH1-N177YT		1	FHNYTLDWAMDK	FHN[787]YTLDWAMDK	2	y	1	2	12	CRH1-N177YT	0	FALSE	0	0.99	FALSE	1
812	262.14	12	CRH1-N177YT		1	FHNYTLDWAMDK	FHN[812]YTLDWAMDK	2	y	1	2	12	CRH1-N177YT	0	FALSE	0	0.99	FALSE	1
837	262.14	12	CRH1-N177YT		1	FHNYTLDWAMDK	FHN[837]YTLDWAMDK	2	y	1	2	12	CRH1-N177YT	0	FALSE	0	0.99	FALSE	1
862	262.14	12	CRH1-N177YT		1	FHNYTLDWAMDK	FHN[862]YTLDWAMDK	2	y	1	2	12	CRH1-N177YT	0	FALSE	0	0.99	FALSE	1
887	262.14	12	CRH1-N177YT		1	FHNYTLDWAMDK	FHN[887]YTLDWAMDK	2	y	1	2	12	CRH1-N177YT	0	FALSE	0	0.99	FALSE	1
912	262.14	12	CRH1-N177YT		1	FHNYTLDWAMDK	FHN[912]YTLDWAMDK	2	y	1	2	12	CRH1-N177YT	0	FALSE	0	0.99	FALSE	1
937	262.14	12	CRH1-N177YT		1	FHNYTLDWAMDK	FHN[937]YTLDWAMDK	2	y	1	2	12	CRH1-N177YT	0	FALSE	0	0.99	FALSE	1
962	262.14	12	CRH1-N177YT		1	FHNYTLDWAMDK	FHN[962]YTLDWAMDK	2	y	1	2	12	CRH1-N177YT	0	FALSE	0	0.99	FALSE	1
987	262.14	12	CRH1-N177YT		1	FHNYTLDWAMDK	FHN[987]YTLDWAMDK	2	y	1	2	12	CRH1-N177YT	0	FALSE	0	0.99	FALSE	1
1012	262.14	12	CRH1-N177YT		1	FHNYTLDWAMDK	FHN[1012]YTLDWAMDK	2	y	1	2	12	CRH1-N177YT	0	FALSE	0	0.99	FALSE	1
1037	262.14	12	CRH1-N177YT		1	FHNYTLDWAMDK	FHN[1037]YTLDWAMDK	2	y	1	2	12	CRH1-N177YT	0	FALSE	0	0.99	FALSE	1
1062	262.14	12	CRH1-N177YT		1	FHNYTLDWAMDK	FHN[1062]YTLDWAMDK	2	y	1	2	12	CRH1-N177YT	0	FALSE	0	0.99	FALSE	1
1087	262.14	12	CRH1-N177YT		1	FHNYTLDWAMDK	FHN[1087]YTLDWAMDK	2	y	1	2	12	CRH1-N177YT	0	FALSE	0	0.99	FALSE	1
1112	262.14	12	CRH1-N177YT		1	FHNYTLDWAMDK	FHN[1112]YTLDWAMDK	2	y	1	2	12	CRH1-N177YT	0	FALSE	0	0.99	FALSE	1
1137	262.14	12	CRH1-N177YT		1	FHNYTLDWAMDK	FHN[1137]YTLDWAMDK	2	y	1	2	12	CRH1-N177YT	0	FALSE	0	0.99	FALSE	1
1162	262.14	12	CRH1-N177YT		1	FHNYTLDWAMDK	FHN[1162]YTLDWAMDK	2	y	1	2	12	CRH1-N177YT	0	FALSE	0	0.99	FALSE	1
1187	262.14	12	CRH1-N177YT		1	FHNYTLDWAMDK	FHN[1187]YTLDWAMDK	2	y	1	2	12	CRH1-N177YT	0	FALSE	0	0.99	FALSE	1
1212	262.14	12	CRH1-N177YT		1	FHNYTLDWAMDK	FHN[1212]YTLDWAMDK	2	y	1	2	12	CRH1-N177YT	0	FALSE	0	0.99	FALSE	1
1237	262.14	12	CRH1-N177YT		1	FHNYTLDWAMDK	FHN[1237]YTLDWAMDK	2	y	1	2	12	CRH1-N177YT	0	FALSE	0	0.99	FALSE	1
412.5	143.071	12	CRH1-N177YT		1	FHNYTLDWAMDK	FHN[412]YTLDWAMDK	2	b	2	2	12	CRH1-N177YT	0	FALSE	0	0.99	FALSE	1
437	143.071	12	CRH1-N177YT		1	FHNYTLDWAMDK	FHN[437]YTLDWAMDK	2	b	2	2	12	CRH1-N177YT	0	FALSE	0	0.99	FALSE	1
462	143.071	12	CRH1-N177YT		1	FHNYTLDWAMDK	FHN[462]YTLDWAMDK	2	b	2	2	12	CRH1-N177YT	0	FALSE	0	0.99	FALSE	1
487	143.071	12	CRH1-N177YT		1	FHNYTLDWAMDK	FHN[487]YTLDWAMDK	2	b	2	2	12	CRH1-N177YT	0	FALSE	0	0.99	FALSE	1
512	143.071	12	CRH1-N177YT		1	FHNYTLDWAMDK	FHN[512]YTLDWAMDK	2	b	2	2	12	CRH1-N177YT	0	FALSE	0	0.99	FALSE	1
537	143.071	12	CRH1-N177YT		1	FHNYTLDWAMDK	FHN[537]YTLDWAMDK	2	b	2	2	12	CRH1-N177YT	0	FALSE	0	0.99	FALSE	1
562	143.071	12	CRH1-N177YT		1	FHNYTLDWAMDK	FHN[562]YTLDWAMDK	2	b	2	2	12	CRH1-N177YT	0	FALSE	0	0.99	FALSE	1
587	143.071	12	CRH1-N177YT		1	FHNYTLDWAMDK	FHN[587]YTLDWAMDK	2	b	2	2	12	CRH1-N177YT	0	FALSE	0	0.99	FALSE	1
612	143.071	12	CRH1-N177YT		1	FHNYTLDWAMDK	FHN[612]YTLDWAMDK	2	b	2	2	12	CRH1-N177YT	0	FALSE	0	0.99	FALSE	1
637	143.071	12	CRH1-N177YT		1	FHNYTLDWAMDK	FHN[637]YTLDWAMDK	2	b	2	2	12	CRH1-N177YT	0	FALSE	0	0.99	FALSE	1
662	143.071	12	CRH1-N177YT		1	FHNYTLDWAMDK	FHN[662]YTLDWAMDK	2	b	2	2	12	CRH1-N177YT	0	FALSE	0	0.99	FALSE	1
687	143.071	12	CRH1-N177YT		1	FHNYTLDWAMDK	FHN[687]YTLDWAMDK	2	b	2	2	12	CRH1-N177YT	0	FALSE	0	0.99	FALSE	1
712	143.071	12	CRH1-N177YT		1	FHNYTLDWAMDK	FHN[712]YTLDWAMDK	2	b	2	2	12	CRH1-N177YT	0	FALSE	0	0.99	FALSE	1
737	143.071	12	CRH1-N177YT		1	FHNYTLDWAMDK	FHN[737]YTLDWAMDK	2	b	2	2	12	CRH1-N177YT	0	FALSE	0	0.99	FALSE	1
762	143.071	12	CRH1-N177YT		1	FHNYTLDWAMDK	FHN[762]YTLDWAMDK	2	b	2	2	12	CRH1-N177YT	0	FALSE	0	0.99	FALSE	1
787	143.071	12	CRH1-N177YT		1	FHNYTLDWAMDK	FHN[787]YTLDWAMDK	2	b	2	2	12	CRH1-N177YT	0	FALSE	0	0.99	FALSE	1
812	143.071	12	CRH1-N177YT		1	FHNYTLDWAMDK	FHN[812]YTLDWAMDK	2	b	2	2	12	CRH1-N177YT	0	FALSE	0	0.99	FALSE	1
837	143.071	12	CRH1-N177YT		1	FHNYTLDWAMDK	FHN[837]YTLDWAMDK	2	b	2	2	12	CRH1-N177YT	0	FALSE	0	0.99	FALSE	1
862	143.071	12	CRH1-N177YT		1	FHNYTLDWAMDK	FHN[862]YTLDWAMDK	2	b	2	2	12	CRH1-N177YT	0	FALSE	0	0.99	FALSE	1
887	143.071	12	CRH1-N177YT		1	FHNYTLDWAMDK	FHN[887]YTLDWAMDK	2	b	2	2	12	CRH1-N177YT	0	FALSE	0	0.99	FALSE	1
912	143.071	12	CRH1-N177YT		1	FHNYTLDWAMDK	FHN[912]YTLDWAMDK	2	b	2	2	12	CRH1-N177YT	0	FALSE	0	0.99	FALSE	1
937	143.071	12	CRH1-N177YT		1	FHNYTLDWAMDK	FHN[937]YTLDWAMDK	2	b	2	2	12	CRH1-N177YT	0	FALSE	0	0.99	FALSE	1
962	143.071	12	CRH1-N177YT		1	FHNYTLDWAMDK	FHN[962]YTLDWAMDK	2	b	2	2	12	CRH1-N177YT	0	FALSE	0	0.99	FALSE	1
987	143.071	12	CRH1-N177YT		1	FHNYTLDWAMDK	FHN[987]YTLDWAMDK	2	b	2	2	12	CRH1-N177YT	0	FALSE	0	0.99	FALSE	1
1012	143.071	12	CRH1-N177YT		1	FHNYTLDWAMDK	FHN[1012]YTLDWAMDK	2	b	2	2	12	CRH1-N177YT	0	FALSE	0	0.99	FALSE	1
1037	143.071	12	CRH1-N177YT		1	FHNYTLDWAMDK	FHN[1037]YTLDWAMDK	2	b	2	2	12	CRH1-N177YT	0	FALSE	0	0.99	FALSE	1
1062	143.071	12	CRH1-N177YT		1	FHNYTLDWAMDK	FHN[1062]YTLDWAMDK	2	b	2	2	12	CRH1-N177YT	0	FALSE	0	0.99	FALSE	1
1087	143.071	12	CRH1-N177YT		1	FHNYTLDWAMDK	FHN[1087]YTLDWAMDK	2	b	2	2	12	CRH1-N177YT	0	FALSE	0	0.99	FALSE	1
1112	143.071	12	CRH1-N177YT		1	FHNYTLDWAMDK	FHN[1112]YTLDWAMDK	2	b	2	2	12	CRH1-N177YT	0	FALSE	0	0.99	FALSE	1
1137	143.071	12	CRH1-N177YT		1	FHNYTLDWAMDK	FHN[1137]YTLDWAMDK	2	b	2	2	12	CRH1-N177YT	0	FALSE	0	0.99	FALSE	1
1162	143.071	12	CRH1-N177YT		1	FHNYTLDWAMDK	FHN[1162]YTLDWAMDK	2	b	2	2	12	CRH1-N177YT	0	FALSE	0	0.99	FALSE	1
1187	143.071	12	CRH1-N177YT		1	FHNYTLDWAMDK	FHN[1187]YTLDWAMDK	2	b	2	2	12	CRH1-N177YT	0	FALSE	0	0.99	FALSE	1
1212	143.071	12	CRH1-N177YT		1	FHNYTLDWAMDK	FHN[1212]YTLDWAMDK	2	b	2	2	12	CRH1-N177YT	0	FALSE	0	0.99	FALSE	1
1237	143.071	12	CRH1-N177YT		1	FHNYTLDWAMDK	FHN[1237]YTLDWAMDK	2	b	2	2	12	CRH1-N177YT	0	FALSE	0	0.99	FALSE	1
412.5	131.573	12	CRH1-N177YT		1	FHNYTLDWAMDK	FHN[412]YTLDWAMDK	2	y	2	2	12	CRH1-N177YT	0	FALSE	0	0.99	FALSE	1
437	131.573	12	CRH1-N177YT		1	FHNYTLDWAMDK	FHN[437]YTLDWAMDK	2	y	2	2	12	CRH1-N177YT	0	FALSE	0	0.99	FALSE	1
462	131.573	12	CRH1-N177YT		1	FHNYTLDWAMDK	FHN[462]YTLDWAMDK	2	y	2	2	12	CRH1-N177YT	0	FALSE	0	0.99	FALSE	1
487	131.573	12	CRH1-N177YT		1	FHNYTLDWAMDK	FHN[487]YTLDWAMDK	2	y	2	2	12	CRH1-N177YT	0	FALSE	0	0.99	FALSE	1
512	131.573	12	CRH1-N177YT		1	FHNYTLDWAMDK	FHN[512]YTLDWAMDK	2	y	2	2	12	CRH1-N177YT	0	FALSE	0	0.99	FALSE	1
537	131.573	12	CRH1-N177YT		1	FHNYTLDWAMDK	FHN[537]YTLDWAMDK	2	y	2	2	12	CRH1-N177YT	0	FALSE	0	0.99	FALSE	1
562	131.573	12	CRH1-N177YT		1	FHNYTLDWAMDK	FHN[562]YTLDWAMDK	2	y	2	2	12	CRH1-N177YT	0	FALSE	0	0.99	FALSE	1
587	131.573	12	CRH1-N177YT		1	FHNYTLDWAMDK	FHN[587]YTLDWAMDK	2	y	2	2	12	CRH1-N177YT	0	FALSE	0	0.99	FALSE	1
612	131.573	12	CRH1-N177YT		1	FHNYTLDWAMDK	FHN[612]YTLDWAMDK	2	y	2	2	12	CRH1-N177YT	0	FALSE	0	0.99	FALSE	1
637	131.573	12	CRH1-N177YT		1	FHNYTLDWAMDK	FHN[637]YTLDWAMDK	2	y	2	2	12	CRH1-N177YT	0	FALSE	0	0.99	FALSE	1
662	131.573	12	CRH1-N177YT		1	FHNYTLDWAMDK	FHN[662]YTLDWAMDK	2	y	2	2	12	CRH1-N177YT	0	FALSE	0	0.99	FALSE	1
687	131.573	12	CRH1-N177YT		1	FHNYTLDWAMDK	FHN[687]YTLDWAMDK	2	y	2	2	12	CRH1-N177YT	0	FALSE	0	0.99	FALSE	1
712	131.573	12	CRH1-N177YT		1	FHNYTLDWAMDK	FHN[712]YTLDWAMDK	2	y	2	2	12	CRH1-N177YT	0	FALSE	0	0.99	FALSE	1
737	131.573	12	CRH1-N177YT		1	FHNYTLDWAMDK	FHN[737]YTLDWAMDK	2	y	2	2	12	CRH1-N177YT	0	FALSE	0	0.99	FALSE	1
762	131.573	12	CRH1-N177YT		1	FHNYTLDWAMDK	FHN[762]YTLDWAMDK	2	y	2	2	12	CRH1-N177YT	0	FALSE	0	0.99	FALSE	1
787	131.573	12	CRH1-N177YT		1	FHNYTLDWAMDK	FHN[787]YTLDWAMDK	2	y	2	2	12	CRH1-N177YT	0	FALSE	0	0.99	FALSE	1
812	131.573	12	CRH1-N177YT		1	FHNYTLDWAMDK	FHN[812]YTLDWAMDK	2	y	2	2	12	CRH1-N177YT	0	FALSE	0	0.99	FALSE	1
837	131.573	12	CRH1-N177YT		1	FHNYTLDWAMDK	FHN[837]YTLDWAMDK	2	y	2	2	12	CRH1-N177YT	0	FALSE	0	0.99	FALSE	1
862	131.573	12	CRH1-N177YT		1	FHNYTLDWAMDK	FHN[862]YTLDWAMDK	2	y	2	2	12	CRH1-N177YT	0	FALSE	0	0.99	FALSE	1
887	131.573	12	CRH1-N177YT		1	FHNYTLDWAMDK	FHN[887]YTLDWAMDK	2	y	2	2	12	CRH1-N177YT	0	FALSE	0	0.99	FALSE	1
912	131.573	12	CRH1-N177YT		1	FHNYTLDWAMDK	FHN[912]YTLDWAMDK	2	y	2	2	12	CRH1-N177YT	0	FALSE	0	0.99	FALSE	1
937	131.573	12	CRH1-N177YT		1	FHNYTLDWAMDK	FHN[937]YTLDWAMDK	2	y	2	2	12	CRH1-N177YT	0	FALSE	0	0.99	FALSE	1
962	131.573	12	CRH1-N177YT		1	FHNYTLDWAMDK	FHN[962]YTLDWAMDK	2	y	2	2	12	CRH1-N177YT	0	FALSE	0	0.99	FALSE	1
987	131.573	12	CRH1-N177YT		1	FHNYTLDWAMDK	FHN[987]YTLDWAMDK	2	y	2	2	12	CRH1-N177YT	0	FALSE	0	0.99	FALSE	1
1012	131.573	12	CRH1-N177YT		1	FHNYTLDWAMDK	FHN[1012]YTLDWAMDK	2	y	2	2	12	CRH1-N177YT	0	FALSE	0	0.99	FALSE	1
1037	131.573	12	CRH1-N177YT		1	FHNYTLDWAMDK	FHN[1037]YTLDWAMDK	2	y	2	2	12	CRH1-N177YT	0	FALSE	0	0.99	FALSE	1
1062	131.573	12	CRH1-N177YT		1	FHNYTLDWAMDK	FHN[1062]YTLDWAMDK	2	y	2	2	12	CRH1-N177YT	0	FALSE	0	0.99	FALSE	1
1087	131.573	12	CRH1-N177YT		1	FHNYTLDWAMDK	FHN[1087]YTLDWAMDK	2	y	2	2	12	CRH1-N177YT	0	FALSE	0	0.99	FALSE	1
1112	131.573	12	CRH1-N177YT		1	FHNYTLDWAMDK	FHN[1112]YTLDWAMDK	2	y	2	2	12	CRH1-N177YT	0	FALSE	0	0.99	FALSE	1
1137	131.573	12	CRH1-N177YT		1	FHNYTLDWAMDK	FHN[1137]YTLDWAMDK	2	y	2	2	12	CRH1-N177YT	0	FALSE	0	0.99	FALSE	1
1162	131.573	12	CRH1-N177YT		1	FHNYTLDWAMDK	FHN[1162]YTLDWAMDK	2	y	2	2	12	CRH1-N177YT	0	FALSE	0	0.99	FALSE	1
1187	131.573	12	CRH1-N177YT		1	FHNYTLDWAMDK	FHN[1187]YTLDWAMDK	2	y	2	2	12	CRH1-N177YT	0	FALSE	0	0.99	FALSE	1
1212	131.573	12	CRH1-N177YT		1	FHNYTLDWAMDK	FHN[1212]YTLDWAMDK	2	y	2	2	12	CRH1-N177YT	0	FALSE	0	0.99	FALSE	1
1237	131.573	12	CRH1-N177YT		1	FHNYTLDWAMDK	FHN[1237]YTLDWAMDK	2	y	2	2	12	CRH1-N177YT	0	FALSE	0	0.99	FALSE	1
412.5	399.178	12	CRH1-N177YT		1	FHNYTLDWAMDK	FHN[412]YTLDWAMDK	2	b	1	3	12	CRH1-N177YT	0	FALSE	0	0.99	FALSE	1
437	399.178	12	CRH1-N177YT		1	FHNYTLDWAMDK	FHN[437]YTLDWAMDK	2	b	1	3	12	CRH1-N177YT	0	FALSE	0	0.99	FALSE	1
462	399.178	12	CRH1-N177YT		1	FHNYTLDWAMDK	FHN[462]YTLDWAMDK	2	b	1	3	12	CRH1-N177YT	0	FALSE	0	0.99	FALSE	1
487	399.178	12	CRH1-N177YT		1	FHNYTLDWAMDK	FHN[487]YTLDWAMDK	2	b	1	3	12	CRH1-N177YT	0	FALSE	0	0.99	FALSE	1
512	399.178	12	CRH1-N177YT		1	FHNYTLDWAMDK	FHN[512]YTLDWAMDK	2	b	1	3	12	CRH1-N177YT	0	FALSE	0	0.99	FALSE	1
537	399.178	12	CRH1-N177YT		1	FHNYTLDWAMDK	FHN[537]YTLDWAMDK	2	b	1	3	12	CRH1-N177YT	0	FALSE	0	0.99	FALSE	1
562	399.178	12	CRH1-N177YT		1	FHNYTLDWAMDK	FHN[562]YTLDWAMDK	2	b	1	3	12	CRH1-N177YT	0	FALSE	0	0.99	FALSE	1
587	399.178	12	CRH1-N177YT		1	FHNYTLDWAMDK	FHN[587]YTLDWAMDK	2	b	1	3	12	CRH1-N177YT	0	FALSE	0	0.99	FALSE	1
612	399.178	12	CRH1-N177YT		1	FHNYTLDWAMDK	FHN[612]YTLDWAMDK	2	b	1	3	12	CRH1-N177YT	0	FALSE	0	0.99	FALSE	1
637	399.178	12	CRH1-N177YT		1	FHNYTLDWAMDK	FHN[637]YTLDWAMDK	2	b	1	3	12	CRH1-N177YT	0	FALSE	0	0.99	FALSE	1
662	399.178	12	CRH1-N177YT		1	FHNYTLDWAMDK	FHN[662]YTLDWAMDK	2	b	1	3	12	CRH1-N177YT	0	FALSE	0	0.99	FALSE	1
687	399.178	12	CRH1-N177YT		1	FHNYTLDWAMDK	FHN[687]YTLDWAMDK	2	b	1	3	12	CRH1-N177YT	0	FALSE	0	0.99	FALSE	1
712	399.178	12	CRH1-N177YT		1	FHNYTLDWAMDK	FHN[712]YTLDWAMDK	2	b	1	3	12	CRH1-N177YT	0	FALSE	0	0.99	FALSE	1
737	399.178	12	CRH1-N177YT		1	FHNYTLDWAMDK	FHN[737]YTLDWAMDK	2	b	1	3	12	CRH1-N177YT	0	FALSE	0	0.99	FALSE	1
762	399.178	12	CRH1-N177YT		1	FHNYTLDWAMDK	FHN[762]YTLDWAMDK	2	b	1	3	12	CRH1-N177YT	0	FALSE	0	0.99	FALSE	1
787	399.178	12	CRH1-N177YT		1	FHNYTLDWAMDK	FHN[787]YTLDWAMDK	2	b	1	3	12	CRH1-N177YT	0	FALSE	0	0.99	FALSE	1
812	399.178	12	CRH1-N177YT		1	FHNYTLDWAMDK	FHN[812]YTLDWAMDK	2	b	1	3	12	CRH1-N177YT	0	FALSE	0	0.99	FALSE	1
837	399.178	12	CRH1-N177YT		1	FHNYTLDWAMDK	FHN[837]YTLDWAMDK	2	b	1	3	12	CRH1-N177YT	0	FALSE	0	0.99	FALSE	1
862	399.178	12	CRH1-N177YT		1	FHNYTLDWAMDK	FHN[862]YTLDWAMDK	2	b	1	3	12	CRH1-N177YT	0	FALSE	0	0.99	FALSE	1
887	399.178	12	CRH1-N177YT		1	FHNYTLDWAMDK	FHN[887]YTLDWAMDK	2	b	1	3	12	CRH1-N177YT	0	FALSE	0	0.99	FALSE	1
912	399.178	12	CRH1-N177YT		1	FHNYTLDWAMDK	FHN[912]YTLDWAMDK	2	b	1	3	12	CRH1-N177YT	0	FALSE	0	0.99	FALSE	1
937	399.178	12	CRH1-N177YT		1	FHNYTLDWAMDK	FHN[937]YTLDWAMDK	2	b	1	3	12	CRH1-N177YT	0	FALSE	0	0.99	FALSE	1
962	399.178	12	CRH1-N177YT		1	FHNYTLDWAMDK	FHN[962]YTLDWAMDK	2	b	1	3	12	CRH1-N177YT	0	FALSE	0	0.99	FALSE	1
987	399.178	12	CRH1-N177YT		1	FHNYTLDWAMDK	FHN[987]YTLDWAMDK	2	b	1	3	12	CRH1-N177YT	0	FALSE	0	0.99	FALSE	1
1012	399.178	12	CRH1-N177YT		1	FHNYTLDWAMDK	FHN[1012]YTLDWAMDK	2	b	1	3	12	CRH1-N177YT	0	FALSE	0	0.99	FALSE	1
1037	399.178	12	CRH1-N177YT		1	FHNYTLDWAMDK	FHN[1037]YTLDWAMDK	2	b	1	3	12	CRH1-N177YT	0	FALSE	0	0.99	FALSE	1
1062	399.178	12	CRH1-N177YT		1	FHNYTLDWAMDK	FHN[1062]YTLDWAMDK	2	b	1	3	12	CRH1-N177YT	0	FALSE	0	0.99	FALSE	1
1087	399.178	12	CRH1-N177YT		1	FHNYTLDWAMDK	FHN[1087]YTLDWAMDK	2	b	1	3	12	CRH1-N177YT	0	FALSE	0	0.99	FALSE	1
1112	399.178	12	CRH1-N177YT		1	FHNYTLDWAMDK	FHN[1112]YTLDWAMDK	2	b	1	3	12	CRH1-N177YT	0	FALSE	0	0.99	FALSE	1
1137	399.178	12	CRH1-N177YT		1	FHNYTLDWAMDK	FHN[1137]YTLDWAMDK	2	b	1	3	12	CRH1-N177YT	0	FALSE	0	0.99	FALSE	1
1162	399.178	12	CRH1-N177YT		1	FHNYTLDWAMDK	FHN[1162]YTLDWAMDK	2	b	1	3	12	CRH1-N177YT	0	FALSE	0	0.99	FALSE	1
1187	399.178	12	CRH1-N177YT		1	FHNYTLDWAMDK	FHN[1187]YTLDWAMDK	2	b	1	3	12	CRH1-N177YT	0	FALSE	0	0.99	FALSE	1
1212	399.178	12	CRH1-N177YT		1	FHNYTLDWAMDK	FHN[1212]YTLDWAMDK	2	b	1	3	12	CRH1-N177YT	0	FALSE	0	0.99	FALSE	1
1237	399.178	12	CRH1-N177YT		1	FHNYTLDWAMDK	FHN[1237]YTLDWAMDK	2	b	1	3	12	CRH1-N177YT	0	FALSE	0	0.99	FALSE	1
412.5	393.18	12	CRH1-N177YT		1	FHNYTLDWAMDK	FHN[412]YTLDWAMDK	2	y	1	3	12	CRH1-N177YT	0	FALSE	0	0.99	FALSE	1
437	393.18	12	CRH1-N177YT		1	FHNYTLDWAMDK	FHN[437]YTLDWAMDK	2	y	1	3	12	CRH1-N177YT	0	FALSE	0	0.99	FALSE	1
462	393.18	12	CRH1-N177YT		1	FHNYTLDWAMDK	FHN[462]YTLDWAMDK	2	y	1	3	12	CRH1-N177YT	0	FALSE	0	0.99	FALSE	1
487	393.18	12	CRH1-N177YT		1	FHNYTLDWAMDK	FHN[487]YTLDWAMDK	2	y	1	3	12	CRH1-N177YT	0	FALSE	0	0.99	FALSE	1
512	393.18	12	CRH1-N177YT		1	FHNYTLDWAMDK	FHN[512]YTLDWAMDK	2	y	1	3	12	CRH1-N177YT	0	FALSE	0	0.99	FALSE	1
537	393.18	12	CRH1-N177YT		1	FHNYTLDWAMDK	FHN[537]YTLDWAMDK	2	y	1	3	12	CRH1-N177YT	0	FALSE	0	0.99	FALSE	1
562	393.18	12	CRH1-N177YT		1	FHNYTLDWAMDK	FHN[562]YTLDWAMDK	2	y	1	3	12	CRH1-N177YT	0	FALSE	0	0.99	FALSE	1
587	393.18	12	CRH1-N177YT		1	FHNYTLDWAMDK	FHN[587]YTLDWAMDK	2	y	1	3	12	CRH1-N177YT	0	FALSE	0	0.99	FALSE	1
612	393.18	12	CRH1-N177YT		1	FHNYTLDWAMDK	FHN[612]YTLDWAMDK	2	y	1	3	12	CRH1-N177YT	0	FALSE	0	0.99	FALSE	1
637	393.18	12	CRH1-N177YT		1	FHNYTLDWAMDK	FHN[637]YTLDWAMDK	2	y	1	3	12	CRH1-N177YT	0	FALSE	0	0.99	FALSE	1
662	393.18	12	CRH1-N177YT		1	FHNYTLDWAMDK	FHN[662]YTLDWAMDK	2	y	1	3	12	CRH1-N177YT	0	FALSE	0	0.99	FALSE	1
687	393.18	12	CRH1-N177YT		1	FHNYTLDWAMDK	FHN[687]YTLDWAMDK	2	y	1	3	12	CRH1-N177YT	0	FALSE	0	0.99	FALSE	1
712	393.18	12	CRH1-N177YT		1	FHNYTLDWAMDK	FHN[712]YTLDWAMDK	2	y	1	3	12	CRH1-N177YT	0	FALSE	0	0.99	FALSE	1
737	393.18	12	CRH1-N177YT		1	FHNYTLDWAMDK	FHN[737]YTLDWAMDK	2	y	1	3	12	CRH1-N177YT	0	FALSE	0	0.99	FALSE	1
762	393.18	12	CRH1-N177YT		1	FHNYTLDWAMDK	FHN[762]YTLDWAMDK	2	y	1	3	12	CRH1-N177YT	0	FALSE	0	0.99	FALSE	1
787	393.18	12	CRH1-N177YT		1	FHNYTLDWAMDK	FHN[787]YTLDWAMDK	2	y	1	3	12	CRH1-N177YT	0	FALSE	0	0.99	FALSE	1
812	393.18	12	CRH1-N177YT		1	FHNYTLDWAMDK	FHN[812]YTLDWAMDK	2	y	1	3	12	CRH1-N177YT	0	FALSE	0	0.99	FALSE	1
837	393.18	12	CRH1-N177YT		1	FHNYTLDWAMDK	FHN[837]YTLDWAMDK	2	y	1	3	12	CRH1-N177YT	0	FALSE	0	0.99	FALSE	1
862	393.18	12	CRH1-N177YT		1	FHNYTLDWAMDK	FHN[862]YTLDWAMDK	2	y	1	3	12	CRH1-N177YT	0	FALSE	0	0.99	FALSE	1
887	393.18	12	CRH1-N177YT		1	FHNYTLDWAMDK	FHN[887]YTLDWAMDK	2	y	1	3	12	CRH1-N177YT	0	FALSE	0	0.99	FALSE	1
912	393.18	12	CRH1-N177YT		1	FHNYTLDWAMDK	FHN[912]YTLDWAMDK	2	y	1	3	12	CRH1-N177YT	0	FALSE	0	0.99	FALSE	1
937	393.18	12	CRH1-N177YT		1	FHNYTLDWAMDK	FHN[937]YTLDWAMDK	2	y	1	3	12	CRH1-N177YT	0	FALSE	0	0.99	FALSE	1
962	393.18	12	CRH1-N177YT		1	FHNYTLDWAMDK	FHN[962]YTLDWAMDK	2	y	1	3	12	CRH1-N177YT	0	FALSE	0	0.99	FALSE	1
987	393.18	12	CRH1-N177YT		1	FHNYTLDWAMDK	FHN[987]YTLDWAMDK	2	y	1	3	12	CRH1-N177YT	0	FALSE	0	0.99	FALSE	1
1012	393.18	12	CRH1-N177YT		1	FHNYTLDWAMDK	FHN[1012]YTLDWAMDK	2	y	1	3	12	CRH1-N177YT	0	FALSE	0	0.99	FALSE	1
1037	393.18	12	CRH1-N177YT		1	FHNYTLDWAMDK	FHN[1037]YTLDWAMDK	2	y	1	3	12	CRH1-N177YT	0	FALSE	0	0.99	FALSE	1
1062	393.18	12	CRH1-N177YT		1	FHNYTLDWAMDK	FHN[1062]YTLDWAMDK	2	y	1	3	12	CRH1-N177YT	0	FALSE	0	0.99	FALSE	1
1087	393.18	12	CRH1-N177YT		1	FHNYTLDWAMDK	FHN[1087]YTLDWAMDK	2	y	1	3	12	CRH1-N177YT	0	FALSE	0	0.99	FALSE	1
1112	393.18	12	CRH1-N177YT		1	FHNYTLDWAMDK	FHN[1112]YTLDWAMDK	2	y	1	3	12	CRH1-N177YT	0	FALSE	0	0.99	FALSE	1
1137	393.18	12	CRH1-N177YT		1	FHNYTLDWAMDK	FHN[1137]YTLDWAMDK	2	y	1	3	12	CRH1-N177YT	0	FALSE	0	0.99	FALSE	1
1162	393.18	12	CRH1-N177YT		1	FHNYTLDWAMDK	FHN[1162]YTLDWAMDK	2	y	1	3	12	CRH1-N177YT	0	FALSE	0	0.99	FALSE	1
1187	393.18	12	CRH1-N177YT		1	FHNYTLDWAMDK	FHN[1187]YTLDWAMDK	2	y	1	3	12	CRH1-N177YT	0	FALSE	0	0.99	FALSE	1
1212	393.18	12	CRH1-N177YT		1	FHNYTLDWAMDK	FHN[1212]YTLDWAMDK	2	y	1	3	12	CRH1-N177YT	0	FALSE	0	0.99	FALSE	1
1237	393.18	12	CRH1-N177YT		1	FHNYTLDWAMDK	FHN[1237]YTLDWAMDK	2	y	1	3	12	CRH1-N177YT	0	FALSE	0	0.99	FALSE	1
412.5	200.092	12	CRH1-N177YT		1	FHNYTLDWAMDK	FHN[412]YTLDWAMDK	2	b	2	3	12	CRH1-N177YT	0	FALSE	0	0.99	FALSE	1
437	200.092	12	CRH1-N177YT		1	FHNYTLDWAMDK	FHN[437]YTLDWAMDK	2	b	2	3	12	CRH1-N177YT	0	FALSE	0	0.99	FALSE	1
462	200.092	12	CRH1-N177YT		1	FHNYTLDWAMDK	FHN[462]YTLDWAMDK	2	b	2	3	12	CRH1-N177YT	0	FALSE	0	0.99	FALSE	1
487	200.092	12	CRH1-N177YT		1	FHNYTLDWAMDK	FHN[487]YTLDWAMDK	2	b	2	3	12	CRH1-N177YT	0	FALSE	0	0.99	FALSE	1
512	200.092	12	CRH1-N177YT		1	FHNYTLDWAMDK	FHN[512]YTLDWAMDK	2	b	2	3	12	CRH1-N177YT	0	FALSE	0	0.99	FALSE	1
537	200.092	12	CRH1-N177YT		1	FHNYTLDWAMDK	FHN[537]YTLDWAMDK	2	b	2	3	12	CRH1-N177YT	0	FALSE	0	0.99	FALSE	1
562	200.092	12	CRH1-N177YT		1	FHNYTLDWAMDK	FHN[562]YTLDWAMDK	2	b	2	3	12	CRH1-N177YT	0	FALSE	0	0.99	FALSE	1
587	200.092	12	CRH1-N177YT		1	FHNYTLDWAMDK	FHN[587]YTLDWAMDK	2	b	2	3	12	CRH1-N177YT	0	FALSE	0	0.99	FALSE	1
612	200.092	12	CRH1-N177YT		1	FHNYTLDWAMDK	FHN[612]YTLDWAMDK	2	b	2	3	12	CRH1-N177YT	0	FALSE	0	0.99	FALSE	1
637	200.092	12	CRH1-N177YT		1	FHNYTLDWAMDK	FHN[637]YTLDWAMDK	2	b	2	3	12	CRH1-N177YT	0	FALSE	0	0.99	FALSE	1
662	200.092	12	CRH1-N177YT		1	FHNYTLDWAMDK	FHN[662]YTLDWAMDK	2	b	2	3	12	CRH1-N177YT	0	FALSE	0	0.99	FALSE	1
687	200.092	12	CRH1-N177YT		1	FHNYTLDWAMDK	FHN[687]YTLDWAMDK	2	b	2	3	12	CRH1-N177YT	0	FALSE	0	0.99	FALSE	1
712	200.092	12	CRH1-N177YT		1	FHNYTLDWAMDK	FHN[712]YTLDWAMDK	2	b	2	3	12	CRH1-N177YT	0	FALSE	0	0.99	FALSE	1
737	200.092	12	CRH1-N177YT		1	FHNYTLDWAMDK	FHN[737]YTLDWAMDK	2	b	2	3	12	CRH1-N177YT	0	FALSE	0	0.99	FALSE	1
762	200.092	12	CRH1-N177YT		1	FHNYTLDWAMDK	FHN[762]YTLDWAMDK	2	b	2	3	12	CRH1-N177YT	0	FALSE	0	0.99	FALSE	1
787	200.092	12	CRH1-N177YT		1	FHNYTLDWAMDK	FHN[787]YTLDWAMDK	2	b	2	3	12	CRH1-N177YT	0	FALSE	0	0.99	FALSE	1
812	200.092	12	CRH1-N177YT		1	FHNYTLDWAMDK	FHN[812]YTLDWAMDK	2	b	2	3	12	CRH1-N177YT	0	FALSE	0	0.99	FALSE	1
837	200.092	12	CRH1-N177YT		1	FHNYTLDWAMDK	FHN[837]YTLDWAMDK	2	b	2	3	12	CRH1-N177YT	0	FALSE	0	0.99	FALSE	1
862	200.092	12	CRH1-N177YT		1	FHNYTLDWAMDK	FHN[862]YTLDWAMDK	2	b	2	3	12	CRH1-N177YT	0	FALSE	0	0.99	FALSE	1
887	200.092	12	CRH1-N177YT		1	FHNYTLDWAMDK	FHN[887]YTLDWAMDK	2	b	2	3	12	CRH1-N177YT	0	FALSE	0	0.99	FALSE	1
912	200.092	12	CRH1-N177YT		1	FHNYTLDWAMDK	FHN[912]YTLDWAMDK	2	b	2	3	12	CRH1-N177YT	0	FALSE	0	0.99	FALSE	1
937	200.092	12	CRH1-N177YT		1	FHNYTLDWAMDK	FHN[937]YTLDWAMDK	2	b	2	3	12	CRH1-N177YT	0	FALSE	0	0.99	FALSE	1
962	200.092	12	CRH1-N177YT		1	FHNYTLDWAMDK	FHN[962]YTLDWAMDK	2	b	2	3	12	CRH1-N177YT	0	FALSE	0	0.99	FALSE	1
987	200.092	12	CRH1-N177YT		1	FHNYTLDWAMDK	FHN[987]YTLDWAMDK	2	b	2	3	12	CRH1-N177YT	0	FALSE	0	0.99	FALSE	1
1012	200.092	12	CRH1-N177YT		1	FHNYTLDWAMDK	FHN[1012]YTLDWAMDK	2	b	2	3	12	CRH1-N177YT	0	FALSE	0	0.99	FALSE	1
1037	200.092	12	CRH1-N177YT		1	FHNYTLDWAMDK	FHN[1037]YTLDWAMDK	2	b	2	3	12	CRH1-N177YT	0	FALSE	0	0.99	FALSE	1
1062	200.092	12	CRH1-N177YT		1	FHNYTLDWAMDK	FHN[1062]YTLDWAMDK	2	b	2	3	12	CRH1-N177YT	0	FALSE	0	0.99	FALSE	1
1087	200.092	12	CRH1-N177YT		1	FHNYTLDWAMDK	FHN[1087]YTLDWAMDK	2	b	2	3	12	CRH1-N177YT	0	FALSE	0	0.99	FALSE	1
1112	200.092	12	CRH1-N177YT		1	FHNYTLDWAMDK	FHN[1112]YTLDWAMDK	2	b	2	3	12	CRH1-N177YT	0	FALSE	0	0.99	FALSE	1
1137	200.092	12	CRH1-N177YT		1	FHNYTLDWAMDK	FHN[1137]YTLDWAMDK	2	b	2	3	12	CRH1-N177YT	0	FALSE	0	0.99	FALSE	1
1162	200.092	12	CRH1-N177YT		1	FHNYTLDWAMDK	FHN[1162]YTLDWAMDK	2	b	2	3	12	CRH1-N177YT	0	FALSE	0	0.99	FALSE	1
1187	200.092	12	CRH1-N177YT		1	FHNYTLDWAMDK	FHN[1187]YTLDWAMDK	2	b	2	3	12	CRH1-N177YT	0	FALSE	0	0.99	FALSE	1
1212	200.092	12	CRH1-N177YT		1	FHNYTLDWAMDK	FHN[1212]YTLDWAMDK	2	b	2	3	12	CRH1-N177YT	0	FALSE	0	0.99	FALSE	1
1237	200.092	12	CRH1-N177YT		1	FHNYTLDWAMDK	FHN[1237]YTLDWAMDK	2	b	2	3	12	CRH1-N177YT	0	FALSE	0	0.99	FALSE	1
412.5	197.094	12	CRH1-N177YT		1	FHNYTLDWAMDK	FHN[412]YTLDWAMDK	2	y	2	3	12	CRH1-N177YT	0	FALSE	0	0.99	FALSE	1
437	197.094	12	CRH1-N177YT		1	FHNYTLDWAMDK	FHN[437]YTLDWAMDK	2	y	2	3	12	CRH1-N177YT	0	FALSE	0	0.99	FALSE	1
462	197.094	12	CRH1-N177YT		1	FHNYTLDWAMDK	FHN[462]YTLDWAMDK	2	y	2	3	12	CRH1-N177YT	0	FALSE	0	0.99	FALSE	1
487	197.094	12	CRH1-N177YT		1	FHNYTLDWAMDK	FHN[487]YTLDWAMDK	2	y	2	3	12	CRH1-N177YT	0	FALSE	0	0.99	FALSE	1
512	197.094	12	CRH1-N177YT		1	FHNYTLDWAMDK	FHN[512]YTLDWAMDK	2	y	2	3	12	CRH1-N177YT	0	FALSE	0	0.99	FALSE	1
537	197.094	12	CRH1-N177YT		1	FHNYTLDWAMDK	FHN[537]YTLDWAMDK	2	y	2	3	12	CRH1-N177YT	0	FALSE	0	0.99	FALSE	1
562	197.094	12	CRH1-N177YT		1	FHNYTLDWAMDK	FHN[562]YTLDWAMDK	2	y	2	3	12	CRH1-N177YT	0	FALSE	0	0.99	FALSE	1
587	197.094	12	CRH1-N177YT		1	FHNYTLDWAMDK	FHN[587]YTLDWAMDK	2	y	2	3	12	CRH1-N177YT	0	FALSE	0	0.99	FALSE	1
612	197.094	12	CRH1-N177YT		1	FHNYTLDWAMDK	FHN[612]YTLDWAMDK	2	y	2	3	12	CRH1-N177YT	0	FALSE	0	0.99	FALSE	1
637	197.094	12	CRH1-N177YT		1	FHNYTLDWAMDK	FHN[637]YTLDWAMDK	2	y	2	3	12	CRH1-N177YT	0	FALSE	0	0.99	FALSE	1
662	197.094	12	CRH1-N177YT		1	FHNYTLDWAMDK	FHN[662]YTLDWAMDK	2	y	2	3	12	CRH1-N177YT	0	FALSE	0	0.99	FALSE	1
687	197.094	12	CRH1-N177YT		1	FHNYTLDWAMDK	FHN[687]YTLDWAMDK	2	y	2	3	12	CRH1-N177YT	0	FALSE	0	0.99	FALSE	1
712	197.094	12	CRH1-N177YT		1	FHNYTLDWAMDK	FHN[712]YTLDWAMDK	2	y	2	3	12	CRH1-N177YT	0	FALSE	0	0.99	FALSE	1
737	197.094	12	CRH1-N177YT		1	FHNYTLDWAMDK	FHN[737]YTLDWAMDK	2	y	2	3	12	CRH1-N177YT	0	FALSE	0	0.99	FALSE	1
762	197.094	12	CRH1-N177YT		1	FHNYTLDWAMDK	FHN[762]YTLDWAMDK	2	y	2	3	12	CRH1-N177YT	0	FALSE	0	0.99	FALSE	1
787	197.094	12	CRH1-N177YT		1	FHNYTLDWAMDK	FHN[787]YTLDWAMDK	2	y	2	3	12	CRH1-N177YT	0	FALSE	0	0.99	FALSE	1
812	197.094	12	CRH1-N177YT		1	FHNYTLDWAMDK	FHN[812]YTLDWAMDK	2	y	2	3	12	CRH1-N177YT	0	FALSE	0	0.99	FALSE	1
837	197.094	12	CRH1-N177YT		1	FHNYTLDWAMDK	FHN[837]YTLDWAMDK	2	y	2	3	12	CRH1-N177YT	0	FALSE	0	0.99	FALSE	1
862	197.094	12	CRH1-N177YT		1	FHNYTLDWAMDK	FHN[862]YTLDWAMDK	2	y	2	3	12	CRH1-N177YT	0	FALSE	0	0.99	FALSE	1
887	197.094	12	CRH1-N177YT		1	FHNYTLDWAMDK	FHN[887]YTLDWAMDK	2	y	2	3	12	CRH1-N177YT	0	FALSE	0	0.99	FALSE	1
912	197.094	12	CRH1-N177YT		1	FHNYTLDWAMDK	FHN[912]YTLDWAMDK	2	y	2	3	12	CRH1-N177YT	0	FALSE	0	0.99	FALSE	1
937	197.094	12	CRH1-N177YT		1	FHNYTLDWAMDK	FHN[937]YTLDWAMDK	2	y	2	3	12	CRH1-N177YT	0	FALSE	0	0.99	FALSE	1
962	197.094	12	CRH1-N177YT		1	FHNYTLDWAMDK	FHN[962]YTLDWAMDK	2	y	2	3	12	CRH1-N177YT	0	FALSE	0	0.99	FALSE	1
987	197.094	12	CRH1-N177YT		1	FHNYTLDWAMDK	FHN[987]YTLDWAMDK	2	y	2	3	12	CRH1-N177YT	0	FALSE	0	0.99	FALSE	1
1012	197.094	12	CRH1-N177YT		1	FHNYTLDWAMDK	FHN[1012]YTLDWAMDK	2	y	2	3	12	CRH1-N177YT	0	FALSE	0	0.99	FALSE	1
1037	197.094	12	CRH1-N177YT		1	FHNYTLDWAMDK	FHN[1037]YTLDWAMDK	2	y	2	3	12	CRH1-N177YT	0	FALSE	0	0.99	FALSE	1
1062	197.094	12	CRH1-N177YT		1	FHNYTLDWAMDK	FHN[1062]YTLDWAMDK	2	y	2	3	12	CRH1-N177YT	0	FALSE	0	0.99	FALSE	1
1087	197.094	12	CRH1-N177YT		1	FHNYTLDWAMDK	FHN[1087]YTLDWAMDK	2	y	2	3	12	CRH1-N177YT	0	FALSE	0	0.99	FALSE	1
1112	197.094	12	CRH1-N177YT		1	FHNYTLDWAMDK	FHN[1112]YTLDWAMDK	2	y	2	3	12	CRH1-N177YT	0	FALSE	0	0.99	FALSE	1
1137	197.094	12	CRH1-N177YT		1	FHNYTLDWAMDK	FHN[1137]YTLDWAMDK	2	y	2	3	12	CRH1-N177YT	0	FALSE	0	0.99	FALSE	1
1162	197.094	12	CRH1-N177YT		1	FHNYTLDWAMDK	FHN[1162]YTLDWAMDK	2	y	2	3	12	CRH1-N177YT	0	FALSE	0	0.99	FALSE	1
1187	197.094	12	CRH1-N177YT		1	FHNYTLDWAMDK	FHN[1187]YTLDWAMDK	2	y	2	3	12	CRH1-N177YT	0	FALSE	0	0.99	FALSE	1
1212	197.094	12	CRH1-N177YT		1	FHNYTLDWAMDK	FHN[1212]YTLDWAMDK	2	y	2	3	12	CRH1-N177YT	0	FALSE	0	0.99	FALSE	1
1237	197.094	12	CRH1-N177YT		1	FHNYTLDWAMDK	FHN[1237]YTLDWAMDK	2	y	2	3	12	CRH1-N177YT	0	FALSE	0	0.99	FALSE	1
412.5	562.241	12	CRH1-N177YT		1	FHNYTLDWAMDK	FHN[412]YTLDWAMDK	2	b	1	4	12	CRH1-N177YT	0	FALSE	0	0.99	FALSE	1
437	562.241	12	CRH1-N177YT		1	FHNYTLDWAMDK	FHN[437]YTLDWAMDK	2	b	1	4	12	CRH1-N177YT	0	FALSE	0	0.99	FALSE	1
462	562.241	12	CRH1-N177YT		1	FHNYTLDWAMDK	FHN[462]YTLDWAMDK	2	b	1	4	12	CRH1-N177YT	0	FALSE	0	0.99	FALSE	1
487	562.241	12	CRH1-N177YT		1	FHNYTLDWAMDK	FHN[487]YTLDWAMDK	2	b	1	4	12	CRH1-N177YT	0	FALSE	0	0.99	FALSE	1
512	562.241	12	CRH1-N177YT		1	FHNYTLDWAMDK	FHN[512]YTLDWAMDK	2	b	1	4	12	CRH1-N177YT	0	FALSE	0	0.99	FALSE	1
537	562.241	12	CRH1-N177YT		1	FHNYTLDWAMDK	FHN[537]YTLDWAMDK	2	b	1	4	12	CRH1-N177YT	0	FALSE	0	0.99	FALSE	1
562	562.241	12	CRH1-N177YT		1	FHNYTLDWAMDK	FHN[562]YTLDWAMDK	2	b	1	4	12	CRH1-N177YT	0	FALSE	0	0.99	FALSE	1
587	562.241	12	CRH1-N177YT		1	FHNYTLDWAMDK	FHN[587]YTLDWAMDK	2	b	1	4	12	CRH1-N177YT	0	FALSE	0	0.99	FALSE	1
612	562.241	12	CRH1-N177YT		1	FHNYTLDWAMDK	FHN[612]YTLDWAMDK	2	b	1	4	12	CRH1-N177YT	0	FALSE	0	0.99	FALSE	1
637	562.241	12	CRH1-N177YT		1	FHNYTLDWAMDK	FHN[637]YTLDWAMDK	2	b	1	4	12	CRH1-N177YT	0	FALSE	0	0.99	FALSE	1
662	562.241	12	CRH1-N177YT		1	FHNYTLDWAMDK	FHN[662]YTLDWAMDK	2	b	1	4	12	CRH1-N177YT	0	FALSE	0	0.99	FALSE	1
687	562.241	12	CRH1-N177YT		1	FHNYTLDWAMDK	FHN[687]YTLDWAMDK	2	b	1	4	12	CRH1-N177YT	0	FALSE	0	0.99	FALSE	1
712	562.241	12	CRH1-N177YT		1	FHNYTLDWAMDK	FHN[712]YTLDWAMDK	2	b	1	4	12	CRH1-N177YT	0	FALSE	0	0.99	FALSE	1
737	562.241	12	CRH1-N177YT		1	FHNYTLDWAMDK	FHN[737]YTLDWAMDK	2	b	1	4	12	CRH1-N177YT	0	FALSE	0	0.99	FALSE	1
762	562.241	12	CRH1-N177YT		1	FHNYTLDWAMDK	FHN[762]YTLDWAMDK	2	b	1	4	12	CRH1-N177YT	0	FALSE	0	0.99	FALSE	1
787	562.241	12	CRH1-N177YT		1	FHNYTLDWAMDK	FHN[787]YTLDWAMDK	2	b	1	4	12	CRH1-N177YT	0	FALSE	0	0.99	FALSE	1
812	562.241	12	CRH1-N177YT		1	FHNYTLDWAMDK	FHN[812]YTLDWAMDK	2	b	1	4	12	CRH1-N177YT	0	FALSE	0	0.99	FALSE	1
837	562.241	12	CRH1-N177YT		1	FHNYTLDWAMDK	FHN[837]YTLDWAMDK	2	b	1	4	12	CRH1-N177YT	0	FALSE	0	0.99	FALSE	1
862	562.241	12	CRH1-N177YT		1	FHNYTLDWAMDK	FHN[862]YTLDWAMDK	2	b	1	4	12	CRH1-N177YT	0	FALSE	0	0.99	FALSE	1
887	562.241	12	CRH1-N177YT		1	FHNYTLDWAMDK	FHN[887]YTLDWAMDK	2	b	1	4	12	CRH1-N177YT	0	FALSE	0	0.99	FALSE	1
912	562.241	12	CRH1-N177YT		1	FHNYTLDWAMDK	FHN[912]YTLDWAMDK	2	b	1	4	12	CRH1-N177YT	0	FALSE	0	0.99	FALSE	1
937	562.241	12	CRH1-N177YT		1	FHNYTLDWAMDK	FHN[937]YTLDWAMDK	2	b	1	4	12	CRH1-N177YT	0	FALSE	0	0.99	FALSE	1
962	562.241	12	CRH1-N177YT		1	FHNYTLDWAMDK	FHN[962]YTLDWAMDK	2	b	1	4	12	CRH1-N177YT	0	FALSE	0	0.99	FALSE	1
987	562.241	12	CRH1-N177YT		1	FHNYTLDWAMDK	FHN[987]YTLDWAMDK	2	b	1	4	12	CRH1-N177YT	0	FALSE	0	0.99	FALSE	1
1012	562.241	12	CRH1-N177YT		1	FHNYTLDWAMDK	FHN[1012]YTLDWAMDK	2	b	1	4	12	CRH1-N177YT	0	FALSE	0	0.99	FALSE	1
1037	562.241	12	CRH1-N177YT		1	FHNYTLDWAMDK	FHN[1037]YTLDWAMDK	2	b	1	4	12	CRH1-N177YT	0	FALSE	0	0.99	FALSE	1
1062	562.241	12	CRH1-N177YT		1	FHNYTLDWAMDK	FHN[1062]YTLDWAMDK	2	b	1	4	12	CRH1-N177YT	0	FALSE	0	0.99	FALSE	1
1087	562.241	12	CRH1-N177YT		1	FHNYTLDWAMDK	FHN[1087]YTLDWAMDK	2	b	1	4	12	CRH1-N177YT	0	FALSE	0	0.99	FALSE	1
1112	562.241	12	CRH1-N177YT		1	FHNYTLDWAMDK	FHN[1112]YTLDWAMDK	2	b	1	4	12	CRH1-N177YT	0	FALSE	0	0.99	FALSE	1
1137	562.241	12	CRH1-N177YT		1	FHNYTLDWAMDK	FHN[1137]YTLDWAMDK	2	b	1	4	12	CRH1-N177YT	0	FALSE	0	0.99	FALSE	1
1162	562.241	12	CRH1-N177YT		1	FHNYTLDWAMDK	FHN[1162]YTLDWAMDK	2	b	1	4	12	CRH1-N177YT	0	FALSE	0	0.99	FALSE	1
1187	562.241	12	CRH1-N177YT		1	FHNYTLDWAMDK	FHN[1187]YTLDWAMDK	2	b	1	4	12	CRH1-N177YT	0	FALSE	0	0.99	FALSE	1
1212	562.241	12	CRH1-N177YT		1	FHNYTLDWAMDK	FHN[1212]YTLDWAMDK	2	b	1	4	12	CRH1-N177YT	0	FALSE	0	0.99	FALSE	1
1237	562.241	12	CRH1-N177YT		1	FHNYTLDWAMDK	FHN[1237]YTLDWAMDK	2	b	1	4	12	CRH1-N177YT	0	FALSE	0	0.99	FALSE	1
412.5	464.217	12	CRH1-N177YT		1	FHNYTLDWAMDK	FHN[412]YTLDWAMDK	2	y	1	4	12	CRH1-N177YT	0	FALSE	0	0.99	FALSE	1
437	464.217	12	CRH1-N177YT		1	FHNYTLDWAMDK	FHN[437]YTLDWAMDK	2	y	1	4	12	CRH1-N177YT	0	FALSE	0	0.99	FALSE	1
462	464.217	12	CRH1-N177YT		1	FHNYTLDWAMDK	FHN[462]YTLDWAMDK	2	y	1	4	12	CRH1-N177YT	0	FALSE	0	0.99	FALSE	1
487	464.217	12	CRH1-N177YT		1	FHNYTLDWAMDK	FHN[487]YTLDWAMDK	2	y	1	4	12	CRH1-N177YT	0	FALSE	0	0.99	FALSE	1
512	464.217	12	CRH1-N177YT		1	FHNYTLDWAMDK	FHN[512]YTLDWAMDK	2	y	1	4	12	CRH1-N177YT	0	FALSE	0	0.99	FALSE	1
537	464.217	12	CRH1-N177YT		1	FHNYTLDWAMDK	FHN[537]YTLDWAMDK	2	y	1	4	12	CRH1-N177YT	0	FALSE	0	0.99	FALSE	1
562	464.217	12	CRH1-N177YT		1	FHNYTLDWAMDK	FHN[562]YTLDWAMDK	2	y	1	4	12	CRH1-N177YT	0	FALSE	0	0.99	FALSE	1
587	464.217	12	CRH1-N177YT		1	FHNYTLDWAMDK	FHN[587]YTLDWAMDK	2	y	1	4	12	CRH1-N177YT	0	FALSE	0	0.99	FALSE	1
612	464.217	12	CRH1-N177YT		1	FHNYTLDWAMDK	FHN[612]YTLDWAMDK	2	y	1	4	12	CRH1-N177YT	0	FALSE	0	0.99	FALSE	1
637	464.217	12	CRH1-N177YT		1	FHNYTLDWAMDK	FHN[637]YTLDWAMDK	2	y	1	4	12	CRH1-N177YT	0	FALSE	0	0.99	FALSE	1
662	464.217	12	CRH1-N177YT		1	FHNYTLDWAMDK	FHN[662]YTLDWAMDK	2	y	1	4	12	CRH1-N177YT	0	FALSE	0	0.99	FALSE	1
687	464.217	12	CRH1-N177YT		1	FHNYTLDWAMDK	FHN[687]YTLDWAMDK	2	y	1	4	12	CRH1-N177YT	0	FALSE	0	0.99	FALSE	1
712	464.217	12	CRH1-N177YT		1	FHNYTLDWAMDK	FHN[712]YTLDWAMDK	2	y	1	4	12	CRH1-N177YT	0	FALSE	0	0.99	FALSE	1
737	464.217	12	CRH1-N177YT		1	FHNYTLDWAMDK	FHN[737]YTLDWAMDK	2	y	1	4	12	CRH1-N177YT	0	FALSE	0	0.99	FALSE	1
762	464.217	12	CRH1-N177YT		1	FHNYTLDWAMDK	FHN[762]YTLDWAMDK	2	y	1	4	12	CRH1-N177YT	0	FALSE	0	0.99	FALSE	1
787	464.217	12	CRH1-N177YT		1	FHNYTLDWAMDK	FHN[787]YTLDWAMDK	2	y	1	4	12	CRH1-N177YT	0	FALSE	0	0.99	FALSE	1
812	464.217	12	CRH1-N177YT		1	FHNYTLDWAMDK	FHN[812]YTLDWAMDK	2	y	1	4	12	CRH1-N177YT	0	FALSE	0	0.99	FALSE	1
837	464.217	12	CRH1-N177YT		1	FHNYTLDWAMDK	FHN[837]YTLDWAMDK	2	y	1	4	12	CRH1-N177YT	0	FALSE	0	0.99	FALSE	1
862	464.217	12	CRH1-N177YT		1	FHNYTLDWAMDK	FHN[862]YTLDWAMDK	2	y	1	4	12	CRH1-N177YT	0	FALSE	0	0.99	FALSE	1
887	464.217	12	CRH1-N177YT		1	FHNYTLDWAMDK	FHN[887]YTLDWAMDK	2	y	1	4	12	CRH1-N177YT	0	FALSE	0	0.99	FALSE	1
912	464.217	12	CRH1-N177YT		1	FHNYTLDWAMDK	FHN[912]YTLDWAMDK	2	y	1	4	12	CRH1-N177YT	0	FALSE	0	0.99	FALSE	1
937	464.217	12	CRH1-N177YT		1	FHNYTLDWAMDK	FHN[937]YTLDWAMDK	2	y	1	4	12	CRH1-N177YT	0	FALSE	0	0.99	FALSE	1
962	464.217	12	CRH1-N177YT		1	FHNYTLDWAMDK	FHN[962]YTLDWAMDK	2	y	1	4	12	CRH1-N177YT	0	FALSE	0	0.99	FALSE	1
987	464.217	12	CRH1-N177YT		1	FHNYTLDWAMDK	FHN[987]YTLDWAMDK	2	y	1	4	12	CRH1-N177YT	0	FALSE	0	0.99	FALSE	1
1012	464.217	12	CRH1-N177YT		1	FHNYTLDWAMDK	FHN[1012]YTLDWAMDK	2	y	1	4	12	CRH1-N177YT	0	FALSE	0	0.99	FALSE	1
1037	464.217	12	CRH1-N177YT		1	FHNYTLDWAMDK	FHN[1037]YTLDWAMDK	2	y	1	4	12	CRH1-N177YT	0	FALSE	0	0.99	FALSE	1
1062	464.217	12	CRH1-N177YT		1	FHNYTLDWAMDK	FHN[1062]YTLDWAMDK	2	y	1	4	12	CRH1-N177YT	0	FALSE	0	0.99	FALSE	1
1087	464.217	12	CRH1-N177YT		1	FHNYTLDWAMDK	FHN[1087]YTLDWAMDK	2	y	1	4	12	CRH1-N177YT	0	FALSE	0	0.99	FALSE	1
1112	464.217	12	CRH1-N177YT		1	FHNYTLDWAMDK	FHN[1112]YTLDWAMDK	2	y	1	4	12	CRH1-N177YT	0	FALSE	0	0.99	FALSE	1
1137	464.217	12	CRH1-N177YT		1	FHNYTLDWAMDK	FHN[1137]YTLDWAMDK	2	y	1	4	12	CRH1-N177YT	0	FALSE	0	0.99	FALSE	1
1162	464.217	12	CRH1-N177YT		1	FHNYTLDWAMDK	FHN[1162]YTLDWAMDK	2	y	1	4	12	CRH1-N177YT	0	FALSE	0	0.99	FALSE	1
1187	464.217	12	CRH1-N177YT		1	FHNYTLDWAMDK	FHN[1187]YTLDWAMDK	2	y	1	4	12	CRH1-N177YT	0	FALSE	0	0.99	FALSE	1
1212	464.217	12	CRH1-N177YT		1	FHNYTLDWAMDK	FHN[1212]YTLDWAMDK	2	y	1	4	12	CRH1-N177YT	0	FALSE	0	0.99	FALSE	1
1237	464.217	12	CRH1-N177YT		1	FHNYTLDWAMDK	FHN[1237]YTLDWAMDK	2	y	1	4	12	CRH1-N177YT	0	FALSE	0	0.99	FALSE	1
412.5	281.624	12	CRH1-N177YT		1	FHNYTLDWAMDK	FHN[412]YTLDWAMDK	2	b	2	4	12	CRH1-N177YT	0	FALSE	0	0.99	FALSE	1
437	281.624	12	CRH1-N177YT		1	FHNYTLDWAMDK	FHN[437]YTLDWAMDK	2	b	2	4	12	CRH1-N177YT	0	FALSE	0	0.99	FALSE	1
462	281.624	12	CRH1-N177YT		1	FHNYTLDWAMDK	FHN[462]YTLDWAMDK	2	b	2	4	12	CRH1-N177YT	0	FALSE	0	0.99	FALSE	1
487	281.624	12	CRH1-N177YT		1	FHNYTLDWAMDK	FHN[487]YTLDWAMDK	2	b	2	4	12	CRH1-N177YT	0	FALSE	0	0.99	FALSE	1
512	281.624	12	CRH1-N177YT		1	FHNYTLDWAMDK	FHN[512]YTLDWAMDK	2	b	2	4	12	CRH1-N177YT	0	FALSE	0	0.99	FALSE	1
537	281.624	12	CRH1-N177YT		1	FHNYTLDWAMDK	FHN[537]YTLDWAMDK	2	b	2	4	12	CRH1-N177YT	0	FALSE	0	0.99	FALSE	1
562	281.624	12	CRH1-N177YT		1	FHNYTLDWAMDK	FHN[562]YTLDWAMDK	2	b	2	4	12	CRH1-N177YT	0	FALSE	0	0.99	FALSE	1
587	281.624	12	CRH1-N177YT		1	FHNYTLDWAMDK	FHN[587]YTLDWAMDK	2	b	2	4	12	CRH1-N177YT	0	FALSE	0	0.99	FALSE	1
612	281.624	12	CRH1-N177YT		1	FHNYTLDWAMDK	FHN[612]YTLDWAMDK	2	b	2	4	12	CRH1-N177YT	0	FALSE	0	0.99	FALSE	1
637	281.624	12	CRH1-N177YT		1	FHNYTLDWAMDK	FHN[637]YTLDWAMDK	2	b	2	4	12	CRH1-N177YT	0	FALSE	0	0.99	FALSE	1
662	281.624	12	CRH1-N177YT		1	FHNYTLDWAMDK	FHN[662]YTLDWAMDK	2	b	2	4	12	CRH1-N177YT	0	FALSE	0	0.99	FALSE	1
687	281.624	12	CRH1-N177YT		1	FHNYTLDWAMDK	FHN[687]YTLDWAMDK	2	b	2	4	12	CRH1-N177YT	0	FALSE	0	0.99	FALSE	1
712	281.624	12	CRH1-N177YT		1	FHNYTLDWAMDK	FHN[712]YTLDWAMDK	2	b	2	4	12	CRH1-N177YT	0	FALSE	0	0.99	FALSE	1
737	281.624	12	CRH1-N177YT		1	FHNYTLDWAMDK	FHN[737]YTLDWAMDK	2	b	2	4	12	CRH1-N177YT	0	FALSE	0	0.99	FALSE	1
762	281.624	12	CRH1-N177YT		1	FHNYTLDWAMDK	FHN[762]YTLDWAMDK	2	b	2	4	12	CRH1-N177YT	0	FALSE	0	0.99	FALSE	1
787	281.624	12	CRH1-N177YT		1	FHNYTLDWAMDK	FHN[787]YTLDWAMDK	2	b	2	4	12	CRH1-N177YT	0	FALSE	0	0.99	FALSE	1
812	281.624	12	CRH1-N177YT		1	FHNYTLDWAMDK	FHN[812]YTLDWAMDK	2	b	2	4	12	CRH1-N177YT	0	FALSE	0	0.99	FALSE	1
837	281.624	12	CRH1-N177YT		1	FHNYTLDWAMDK	FHN[837]YTLDWAMDK	2	b	2	4	12	CRH1-N177YT	0	FALSE	0	0.99	FALSE	1
862	281.624	12	CRH1-N177YT		1	FHNYTLDWAMDK	FHN[862]YTLDWAMDK	2	b	2	4	12	CRH1-N177YT	0	FALSE	0	0.99	FALSE	1
887	281.624	12	CRH1-N177YT		1	FHNYTLDWAMDK	FHN[887]YTLDWAMDK	2	b	2	4	12	CRH1-N177YT	0	FALSE	0	0.99	FALSE	1
912	281.624	12	CRH1-N177YT		1	FHNYTLDWAMDK	FHN[912]YTLDWAMDK	2	b	2	4	12	CRH1-N177YT	0	FALSE	0	0.99	FALSE	1
937	281.624	12	CRH1-N177YT		1	FHNYTLDWAMDK	FHN[937]YTLDWAMDK	2	b	2	4	12	CRH1-N177YT	0	FALSE	0	0.99	FALSE	1
962	281.624	12	CRH1-N177YT		1	FHNYTLDWAMDK	FHN[962]YTLDWAMDK	2	b	2	4	12	CRH1-N177YT	0	FALSE	0	0.99	FALSE	1
987	281.624	12	CRH1-N177YT		1	FHNYTLDWAMDK	FHN[987]YTLDWAMDK	2	b	2	4	12	CRH1-N177YT	0	FALSE	0	0.99	FALSE	1
1012	281.624	12	CRH1-N177YT		1	FHNYTLDWAMDK	FHN[1012]YTLDWAMDK	2	b	2	4	12	CRH1-N177YT	0	FALSE	0	0.99	FALSE	1
1037	281.624	12	CRH1-N177YT		1	FHNYTLDWAMDK	FHN[1037]YTLDWAMDK	2	b	2	4	12	CRH1-N177YT	0	FALSE	0	0.99	FALSE	1
1062	281.624	12	CRH1-N177YT		1	FHNYTLDWAMDK	FHN[1062]YTLDWAMDK	2	b	2	4	12	CRH1-N177YT	0	FALSE	0	0.99	FALSE	1
1087	281.624	12	CRH1-N177YT		1	FHNYTLDWAMDK	FHN[1087]YTLDWAMDK	2	b	2	4	12	CRH1-N177YT	0	FALSE	0	0.99	FALSE	1
1112	281.624	12	CRH1-N177YT		1	FHNYTLDWAMDK	FHN[1112]YTLDWAMDK	2	b	2	4	12	CRH1-N177YT	0	FALSE	0	0.99	FALSE	1
1137	281.624	12	CRH1-N177YT		1	FHNYTLDWAMDK	FHN[1137]YTLDWAMDK	2	b	2	4	12	CRH1-N177YT	0	FALSE	0	0.99	FALSE	1
1162	281.624	12	CRH1-N177YT		1	FHNYTLDWAMDK	FHN[1162]YTLDWAMDK	2	b	2	4	12	CRH1-N177YT	0	FALSE	0	0.99	FALSE	1
1187	281.624	12	CRH1-N177YT		1	FHNYTLDWAMDK	FHN[1187]YTLDWAMDK	2	b	2	4	12	CRH1-N177YT	0	FALSE	0	0.99	FALSE	1
1212	281.624	12	CRH1-N177YT		1	FHNYTLDWAMDK	FHN[1212]YTLDWAMDK	2	b	2	4	12	CRH1-N177YT	0	FALSE	0	0.99	FALSE	1
1237	281.624	12	CRH1-N177YT		1	FHNYTLDWAMDK	FHN[1237]YTLDWAMDK	2	b	2	4	12	CRH1-N177YT	0	FALSE	0	0.99	FALSE	1
412.5	232.612	12	CRH1-N177YT		1	FHNYTLDWAMDK	FHN[412]YTLDWAMDK	2	y	2	4	12	CRH1-N177YT	0	FALSE	0	0.99	FALSE	1
437	232.612	12	CRH1-N177YT		1	FHNYTLDWAMDK	FHN[437]YTLDWAMDK	2	y	2	4	12	CRH1-N177YT	0	FALSE	0	0.99	FALSE	1
462	232.612	12	CRH1-N177YT		1	FHNYTLDWAMDK	FHN[462]YTLDWAMDK	2	y	2	4	12	CRH1-N177YT	0	FALSE	0	0.99	FALSE	1
487	232.612	12	CRH1-N177YT		1	FHNYTLDWAMDK	FHN[487]YTLDWAMDK	2	y	2	4	12	CRH1-N177YT	0	FALSE	0	0.99	FALSE	1
512	232.612	12	CRH1-N177YT		1	FHNYTLDWAMDK	FHN[512]YTLDWAMDK	2	y	2	4	12	CRH1-N177YT	0	FALSE	0	0.99	FALSE	1
537	232.612	12	CRH1-N177YT		1	FHNYTLDWAMDK	FHN[537]YTLDWAMDK	2	y	2	4	12	CRH1-N177YT	0	FALSE	0	0.99	FALSE	1
562	232.612	12	CRH1-N177YT		1	FHNYTLDWAMDK	FHN[562]YTLDWAMDK	2	y	2	4	12	CRH1-N177YT	0	FALSE	0	0.99	FALSE	1
587	232.612	12	CRH1-N177YT		1	FHNYTLDWAMDK	FHN[587]YTLDWAMDK	2	y	2	4	12	CRH1-N177YT	0	FALSE	0	0.99	FALSE	1
612	232.612	12	CRH1-N177YT		1	FHNYTLDWAMDK	FHN[612]YTLDWAMDK	2	y	2	4	12	CRH1-N177YT	0	FALSE	0	0.99	FALSE	1
637	232.612	12	CRH1-N177YT		1	FHNYTLDWAMDK	FHN[637]YTLDWAMDK	2	y	2	4	12	CRH1-N177YT	0	FALSE	0	0.99	FALSE	1
662	232.612	12	CRH1-N177YT		1	FHNYTLDWAMDK	FHN[662]YTLDWAMDK	2	y	2	4	12	CRH1-N177YT	0	FALSE	0	0.99	FALSE	1
687	232.612	12	CRH1-N177YT		1	FHNYTLDWAMDK	FHN[687]YTLDWAMDK	2	y	2	4	12	CRH1-N177YT	0	FALSE	0	0.99	FALSE	1
712	232.612	12	CRH1-N177YT		1	FHNYTLDWAMDK	FHN[712]YTLDWAMDK	2	y	2	4	12	CRH1-N177YT	0	FALSE	0	0.99	FALSE	1
737	232.612	12	CRH1-N177YT		1	FHNYTLDWAMDK	FHN[737]YTLDWAMDK	2	y	2	4	12	CRH1-N177YT	0	FALSE	0	0.99	FALSE	1
762	232.612	12	CRH1-N177YT		1	FHNYTLDWAMDK	FHN[762]YTLDWAMDK	2	y	2	4	12	CRH1-N177YT	0	FALSE	0	0.99	FALSE	1
787	232.612	12	CRH1-N177YT		1	FHNYTLDWAMDK	FHN[787]YTLDWAMDK	2	y	2	4	12	CRH1-N177YT	0	FALSE	0	0.99	FALSE	1
812	232.612	12	CRH1-N177YT		1	FHNYTLDWAMDK	FHN[812]YTLDWAMDK	2	y	2	4	12	CRH1-N177YT	0	FALSE	0	0.99	FALSE	1
837	232.612	12	CRH1-N177YT		1	FHNYTLDWAMDK	FHN[837]YTLDWAMDK	2	y	2	4	12	CRH1-N177YT	0	FALSE	0	0.99	FALSE	1
862	232.612	12	CRH1-N177YT		1	FHNYTLDWAMDK	FHN[862]YTLDWAMDK	2	y	2	4	12	CRH1-N177YT	0	FALSE	0	0.99	FALSE	1
887	232.612	12	CRH1-N177YT		1	FHNYTLDWAMDK	FHN[887]YTLDWAMDK	2	y	2	4	12	CRH1-N177YT	0	FALSE	0	0.99	FALSE	1
912	232.612	12	CRH1-N177YT		1	FHNYTLDWAMDK	FHN[912]YTLDWAMDK	2	y	2	4	12	CRH1-N177YT	0	FALSE	0	0.99	FALSE	1
937	232.612	12	CRH1-N177YT		1	FHNYTLDWAMDK	FHN[937]YTLDWAMDK	2	y	2	4	12	CRH1-N177YT	0	FALSE	0	0.99	FALSE	1
962	232.612	12	CRH1-N177YT		1	FHNYTLDWAMDK	FHN[962]YTLDWAMDK	2	y	2	4	12	CRH1-N177YT	0	FALSE	0	0.99	FALSE	1
987	232.612	12	CRH1-N177YT		1	FHNYTLDWAMDK	FHN[987]YTLDWAMDK	2	y	2	4	12	CRH1-N177YT	0	FALSE	0	0.99	FALSE	1
1012	232.612	12	CRH1-N177YT		1	FHNYTLDWAMDK	FHN[1012]YTLDWAMDK	2	y	2	4	12	CRH1-N177YT	0	FALSE	0	0.99	FALSE	1
1037	232.612	12	CRH1-N177YT		1	FHNYTLDWAMDK	FHN[1037]YTLDWAMDK	2	y	2	4	12	CRH1-N177YT	0	FALSE	0	0.99	FALSE	1
1062	232.612	12	CRH1-N177YT		1	FHNYTLDWAMDK	FHN[1062]YTLDWAMDK	2	y	2	4	12	CRH1-N177YT	0	FALSE	0	0.99	FALSE	1
1087	232.612	12	CRH1-N177YT		1	FHNYTLDWAMDK	FHN[1087]YTLDWAMDK	2	y	2	4	12	CRH1-N177YT	0	FALSE	0	0.99	FALSE	1
1112	232.612	12	CRH1-N177YT		1	FHNYTLDWAMDK	FHN[1112]YTLDWAMDK	2	y	2	4	12	CRH1-N177YT	0	FALSE	0	0.99	FALSE	1
1137	232.612	12	CRH1-N177YT		1	FHNYTLDWAMDK	FHN[1137]YTLDWAMDK	2	y	2	4	12	CRH1-N177YT	0	FALSE	0	0.99	FALSE	1
1162	232.612	12	CRH1-N177YT		1	FHNYTLDWAMDK	FHN[1162]YTLDWAMDK	2	y	2	4	12	CRH1-N177YT	0	FALSE	0	0.99	FALSE	1
1187	232.612	12	CRH1-N177YT		1	FHNYTLDWAMDK	FHN[1187]YTLDWAMDK	2	y	2	4	12	CRH1-N177YT	0	FALSE	0	0.99	FALSE	1
1212	232.612	12	CRH1-N177YT		1	FHNYTLDWAMDK	FHN[1212]YTLDWAMDK	2	y	2	4	12	CRH1-N177YT	0	FALSE	0	0.99	FALSE	1
1237	232.612	12	CRH1-N177YT		1	FHNYTLDWAMDK	FHN[1237]YTLDWAMDK	2	y	2	4	12	CRH1-N177YT	0	FALSE	0	0.99	FALSE	1
412.5	663.288	12	CRH1-N177YT		1	FHNYTLDWAMDK	FHN[412]YTLDWAMDK	2	b	1	5	12	CRH1-N177YT	0	FALSE	0	0.99	FALSE	1
437	663.288	12	CRH1-N177YT		1	FHNYTLDWAMDK	FHN[437]YTLDWAMDK	2	b	1	5	12	CRH1-N177YT	0	FALSE	0	0.99	FALSE	1
462	663.288	12	CRH1-N177YT		1	FHNYTLDWAMDK	FHN[462]YTLDWAMDK	2	b	1	5	12	CRH1-N177YT	0	FALSE	0	0.99	FALSE	1
487	663.288	12	CRH1-N177YT		1	FHNYTLDWAMDK	FHN[487]YTLDWAMDK	2	b	1	5	12	CRH1-N177YT	0	FALSE	0	0.99	FALSE	1
512	663.288	12	CRH1-N177YT		1	FHNYTLDWAMDK	FHN[512]YTLDWAMDK	2	b	1	5	12	CRH1-N177YT	0	FALSE	0	0.99	FALSE	1
537	663.288	12	CRH1-N177YT		1	FHNYTLDWAMDK	FHN[537]YTLDWAMDK	2	b	1	5	12	CRH1-N177YT	0	FALSE	0	0.99	FALSE	1
562	663.288	12	CRH1-N177YT		1	FHNYTLDWAMDK	FHN[562]YTLDWAMDK	2	b	1	5	12	CRH1-N177YT	0	FALSE	0	0.99	FALSE	1
587	663.288	12	CRH1-N177YT		1	FHNYTLDWAMDK	FHN[587]YTLDWAMDK	2	b	1	5	12	CRH1-N177YT	0	FALSE	0	0.99	FALSE	1
612	663.288	12	CRH1-N177YT		1	FHNYTLDWAMDK	FHN[612]YTLDWAMDK	2	b	1	5	12	CRH1-N177YT	0	FALSE	0	0.99	FALSE	1
637	663.288	12	CRH1-N177YT		1	FHNYTLDWAMDK	FHN[637]YTLDWAMDK	2	b	1	5	12	CRH1-N177YT	0	FALSE	0	0.99	FALSE	1
662	663.288	12	CRH1-N177YT		1	FHNYTLDWAMDK	FHN[662]YTLDWAMDK	2	b	1	5	12	CRH1-N177YT	0	FALSE	0	0.99	FALSE	1
687	663.288	12	CRH1-N177YT		1	FHNYTLDWAMDK	FHN[687]YTLDWAMDK	2	b	1	5	12	CRH1-N177YT	0	FALSE	0	0.99	FALSE	1
712	663.288	12	CRH1-N177YT		1	FHNYTLDWAMDK	FHN[712]YTLDWAMDK	2	b	1	5	12	CRH1-N177YT	0	FALSE	0	0.99	FALSE	1
737	663.288	12	CRH1-N177YT		1	FHNYTLDWAMDK	FHN[737]YTLDWAMDK	2	b	1	5	12	CRH1-N177YT	0	FALSE	0	0.99	FALSE	1
762	663.288	12	CRH1-N177YT		1	FHNYTLDWAMDK	FHN[762]YTLDWAMDK	2	b	1	5	12	CRH1-N177YT	0	FALSE	0	0.99	FALSE	1
787	663.288	12	CRH1-N177YT		1	FHNYTLDWAMDK	FHN[787]YTLDWAMDK	2	b	1	5	12	CRH1-N177YT	0	FALSE	0	0.99	FALSE	1
812	663.288	12	CRH1-N177YT		1	FHNYTLDWAMDK	FHN[812]YTLDWAMDK	2	b	1	5	12	CRH1-N177YT	0	FALSE	0	0.99	FALSE	1
837	663.288	12	CRH1-N177YT		1	FHNYTLDWAMDK	FHN[837]YTLDWAMDK	2	b	1	5	12	CRH1-N177YT	0	FALSE	0	0.99	FALSE	1
862	663.288	12	CRH1-N177YT		1	FHNYTLDWAMDK	FHN[862]YTLDWAMDK	2	b	1	5	12	CRH1-N177YT	0	FALSE	0	0.99	FALSE	1
887	663.288	12	CRH1-N177YT		1	FHNYTLDWAMDK	FHN[887]YTLDWAMDK	2	b	1	5	12	CRH1-N177YT	0	FALSE	0	0.99	FALSE	1
912	663.288	12	CRH1-N177YT		1	FHNYTLDWAMDK	FHN[912]YTLDWAMDK	2	b	1	5	12	CRH1-N177YT	0	FALSE	0	0.99	FALSE	1
937	663.288	12	CRH1-N177YT		1	FHNYTLDWAMDK	FHN[937]YTLDWAMDK	2	b	1	5	12	CRH1-N177YT	0	FALSE	0	0.99	FALSE	1
962	663.288	12	CRH1-N177YT		1	FHNYTLDWAMDK	FHN[962]YTLDWAMDK	2	b	1	5	12	CRH1-N177YT	0	FALSE	0	0.99	FALSE	1
987	663.288	12	CRH1-N177YT		1	FHNYTLDWAMDK	FHN[987]YTLDWAMDK	2	b	1	5	12	CRH1-N177YT	0	FALSE	0	0.99	FALSE	1
1012	663.288	12	CRH1-N177YT		1	FHNYTLDWAMDK	FHN[1012]YTLDWAMDK	2	b	1	5	12	CRH1-N177YT	0	FALSE	0	0.99	FALSE	1
1037	663.288	12	CRH1-N177YT		1	FHNYTLDWAMDK	FHN[1037]YTLDWAMDK	2	b	1	5	12	CRH1-N177YT	0	FALSE	0	0.99	FALSE	1
1062	663.288	12	CRH1-N177YT		1	FHNYTLDWAMDK	FHN[1062]YTLDWAMDK	2	b	1	5	12	CRH1-N177YT	0	FALSE	0	0.99	FALSE	1
1087	663.288	12	CRH1-N177YT		1	FHNYTLDWAMDK	FHN[1087]YTLDWAMDK	2	b	1	5	12	CRH1-N177YT	0	FALSE	0	0.99	FALSE	1
1112	663.288	12	CRH1-N177YT		1	FHNYTLDWAMDK	FHN[1112]YTLDWAMDK	2	b	1	5	12	CRH1-N177YT	0	FALSE	0	0.99	FALSE	1
1137	663.288	12	CRH1-N177YT		1	FHNYTLDWAMDK	FHN[1137]YTLDWAMDK	2	b	1	5	12	CRH1-N177YT	0	FALSE	0	0.99	FALSE	1
1162	663.288	12	CRH1-N177YT		1	FHNYTLDWAMDK	FHN[1162]YTLDWAMDK	2	b	1	5	12	CRH1-N177YT	0	FALSE	0	0.99	FALSE	1
1187	663.288	12	CRH1-N177YT		1	FHNYTLDWAMDK	FHN[1187]YTLDWAMDK	2	b	1	5	12	CRH1-N177YT	0	FALSE	0	0.99	FALSE	1
1212	663.288	12	CRH1-N177YT		1	FHNYTLDWAMDK	FHN[1212]YTLDWAMDK	2	b	1	5	12	CRH1-N177YT	0	FALSE	0	0.99	FALSE	1
1237	663.288	12	CRH1-N177YT		1	FHNYTLDWAMDK	FHN[1237]YTLDWAMDK	2	b	1	5	12	CRH1-N177YT	0	FALSE	0	0.99	FALSE	1
412.5	650.297	12	CRH1-N177YT		1	FHNYTLDWAMDK	FHN[412]YTLDWAMDK	2	y	1	5	12	CRH1-N177YT	0	FALSE	0	0.99	FALSE	1
437	650.297	12	CRH1-N177YT		1	FHNYTLDWAMDK	FHN[437]YTLDWAMDK	2	y	1	5	12	CRH1-N177YT	0	FALSE	0	0.99	FALSE	1
462	650.297	12	CRH1-N177YT		1	FHNYTLDWAMDK	FHN[462]YTLDWAMDK	2	y	1	5	12	CRH1-N177YT	0	FALSE	0	0.99	FALSE	1
487	650.297	12	CRH1-N177YT		1	FHNYTLDWAMDK	FHN[487]YTLDWAMDK	2	y	1	5	12	CRH1-N177YT	0	FALSE	0	0.99	FALSE	1
512	650.297	12	CRH1-N177YT		1	FHNYTLDWAMDK	FHN[512]YTLDWAMDK	2	y	1	5	12	CRH1-N177YT	0	FALSE	0	0.99	FALSE	1
537	650.297	12	CRH1-N177YT		1	FHNYTLDWAMDK	FHN[537]YTLDWAMDK	2	y	1	5	12	CRH1-N177YT	0	FALSE	0	0.99	FALSE	1
562	650.297	12	CRH1-N177YT		1	FHNYTLDWAMDK	FHN[562]YTLDWAMDK	2	y	1	5	12	CRH1-N177YT	0	FALSE	0	0.99	FALSE	1
587	650.297	12	CRH1-N177YT		1	FHNYTLDWAMDK	FHN[587]YTLDWAMDK	2	y	1	5	12	CRH1-N177YT	0	FALSE	0	0.99	FALSE	1
612	650.297	12	CRH1-N177YT		1	FHNYTLDWAMDK	FHN[612]YTLDWAMDK	2	y	1	5	12	CRH1-N177YT	0	FALSE	0	0.99	FALSE	1
637	650.297	12	CRH1-N177YT		1	FHNYTLDWAMDK	FHN[637]YTLDWAMDK	2	y	1	5	12	CRH1-N177YT	0	FALSE	0	0.99	FALSE	1
662	650.297	12	CRH1-N177YT		1	FHNYTLDWAMDK	FHN[662]YTLDWAMDK	2	y	1	5	12	CRH1-N177YT	0	FALSE	0	0.99	FALSE	1
687	650.297	12	CRH1-N177YT		1	FHNYTLDWAMDK	FHN[687]YTLDWAMDK	2	y	1	5	12	CRH1-N177YT	0	FALSE	0	0.99	FALSE	1
712	650.297	12	CRH1-N177YT		1	FHNYTLDWAMDK	FHN[712]YTLDWAMDK	2	y	1	5	12	CRH1-N177YT	0	FALSE	0	0.99	FALSE	1
737	650.297	12	CRH1-N177YT		1	FHNYTLDWAMDK	FHN[737]YTLDWAMDK	2	y	1	5	12	CRH1-N177YT	0	FALSE	0	0.99	FALSE	1
762	650.297	12	CRH1-N177YT		1	FHNYTLDWAMDK	FHN[762]YTLDWAMDK	2	y	1	5	12	CRH1-N177YT	0	FALSE	0	0.99	FALSE	1
787	650.297	12	CRH1-N177YT		1	FHNYTLDWAMDK	FHN[787]YTLDWAMDK	2	y	1	5	12	CRH1-N177YT	0	FALSE	0	0.99	FALSE	1
812	650.297	12	CRH1-N177YT		1	FHNYTLDWAMDK	FHN[812]YTLDWAMDK	2	y	1	5	12	CRH1-N177YT	0	FALSE	0	0.99	FALSE	1
837	650.297	12	CRH1-N177YT		1	FHNYTLDWAMDK	FHN[837]YTLDWAMDK	2	y	1	5	12	CRH1-N177YT	0	FALSE	0	0.99	FALSE	1
862	650.297	12	CRH1-N177YT		1	FHNYTLDWAMDK	FHN[862]YTLDWAMDK	2	y	1	5	12	CRH1-N177YT	0	FALSE	0	0.99	FALSE	1
887	650.297	12	CRH1-N177YT		1	FHNYTLDWAMDK	FHN[887]YTLDWAMDK	2	y	1	5	12	CRH1-N177YT	0	FALSE	0	0.99	FALSE	1
912	650.297	12	CRH1-N177YT		1	FHNYTLDWAMDK	FHN[912]YTLDWAMDK	2	y	1	5	12	CRH1-N177YT	0	FALSE	0	0.99	FALSE	1
937	650.297	12	CRH1-N177YT		1	FHNYTLDWAMDK	FHN[937]YTLDWAMDK	2	y	1	5	12	CRH1-N177YT	0	FALSE	0	0.99	FALSE	1
962	650.297	12	CRH1-N177YT		1	FHNYTLDWAMDK	FHN[962]YTLDWAMDK	2	y	1	5	12	CRH1-N177YT	0	FALSE	0	0.99	FALSE	1
987	650.297	12	CRH1-N177YT		1	FHNYTLDWAMDK	FHN[987]YTLDWAMDK	2	y	1	5	12	CRH1-N177YT	0	FALSE	0	0.99	FALSE	1
1012	650.297	12	CRH1-N177YT		1	FHNYTLDWAMDK	FHN[1012]YTLDWAMDK	2	y	1	5	12	CRH1-N177YT	0	FALSE	0	0.99	FALSE	1
1037	650.297	12	CRH1-N177YT		1	FHNYTLDWAMDK	FHN[1037]YTLDWAMDK	2	y	1	5	12	CRH1-N177YT	0	FALSE	0	0.99	FALSE	1
1062	650.297	12	CRH1-N177YT		1	FHNYTLDWAMDK	FHN[1062]YTLDWAMDK	2	y	1	5	12	CRH1-N177YT	0	FALSE	0	0.99	FALSE	1
1087	650.297	12	CRH1-N177YT		1	FHNYTLDWAMDK	FHN[1087]YTLDWAMDK	2	y	1	5	12	CRH1-N177YT	0	FALSE	0	0.99	FALSE	1
1112	650.297	12	CRH1-N177YT		1	FHNYTLDWAMDK	FHN[1112]YTLDWAMDK	2	y	1	5	12	CRH1-N177YT	0	FALSE	0	0.99	FALSE	1
1137	650.297	12	CRH1-N177YT		1	FHNYTLDWAMDK	FHN[1137]YTLDWAMDK	2	y	1	5	12	CRH1-N177YT	0	FALSE	0	0.99	FALSE	1
1162	650.297	12	CRH1-N177YT		1	FHNYTLDWAMDK	FHN[1162]YTLDWAMDK	2	y	1	5	12	CRH1-N177YT	0	FALSE	0	0.99	FALSE	1
1187	650.297	12	CRH1-N177YT		1	FHNYTLDWAMDK	FHN[1187]YTLDWAMDK	2	y	1	5	12	CRH1-N177YT	0	FALSE	0	0.99	FALSE	1
1212	650.297	12	CRH1-N177YT		1	FHNYTLDWAMDK	FHN[1212]YTLDWAMDK	2	y	1	5	12	CRH1-N177YT	0	FALSE	0	0.99	FALSE	1
1237	650.297	12	CRH1-N177YT		1	FHNYTLDWAMDK	FHN[1237]YTLDWAMDK	2	y	1	5	12	CRH1-N177YT	0	FALSE	0	0.99	FALSE	1
412.5	332.148	12	CRH1-N177YT		1	FHNYTLDWAMDK	FHN[412]YTLDWAMDK	2	b	2	5	12	CRH1-N177YT	0	FALSE	0	0.99	FALSE	1
437	332.148	12	CRH1-N177YT		1	FHNYTLDWAMDK	FHN[437]YTLDWAMDK	2	b	2	5	12	CRH1-N177YT	0	FALSE	0	0.99	FALSE	1
462	332.148	12	CRH1-N177YT		1	FHNYTLDWAMDK	FHN[462]YTLDWAMDK	2	b	2	5	12	CRH1-N177YT	0	FALSE	0	0.99	FALSE	1
487	332.148	12	CRH1-N177YT		1	FHNYTLDWAMDK	FHN[487]YTLDWAMDK	2	b	2	5	12	CRH1-N177YT	0	FALSE	0	0.99	FALSE	1
512	332.148	12	CRH1-N177YT		1	FHNYTLDWAMDK	FHN[512]YTLDWAMDK	2	b	2	5	12	CRH1-N177YT	0	FALSE	0	0.99	FALSE	1
537	332.148	12	CRH1-N177YT		1	FHNYTLDWAMDK	FHN[537]YTLDWAMDK	2	b	2	5	12	CRH1-N177YT	0	FALSE	0	0.99	FALSE	1
562	332.148	12	CRH1-N177YT		1	FHNYTLDWAMDK	FHN[562]YTLDWAMDK	2	b	2	5	12	CRH1-N177YT	0	FALSE	0	0.99	FALSE	1
587	332.148	12	CRH1-N177YT		1	FHNYTLDWAMDK	FHN[587]YTLDWAMDK	2	b	2	5	12	CRH1-N177YT	0	FALSE	0	0.99	FALSE	1
612	332.148	12	CRH1-N177YT		1	FHNYTLDWAMDK	FHN[612]YTLDWAMDK	2	b	2	5	12	CRH1-N177YT	0	FALSE	0	0.99	FALSE	1
637	332.148	12	CRH1-N177YT		1	FHNYTLDWAMDK	FHN[637]YTLDWAMDK	2	b	2	5	12	CRH1-N177YT	0	FALSE	0	0.99	FALSE	1
662	332.148	12	CRH1-N177YT		1	FHNYTLDWAMDK	FHN[662]YTLDWAMDK	2	b	2	5	12	CRH1-N177YT	0	FALSE	0	0.99	FALSE	1
687	332.148	12	CRH1-N177YT		1	FHNYTLDWAMDK	FHN[687]YTLDWAMDK	2	b	2	5	12	CRH1-N177YT	0	FALSE	0	0.99	FALSE	1
712	332.148	12	CRH1-N177YT		1	FHNYTLDWAMDK	FHN[712]YTLDWAMDK	2	b	2	5	12	CRH1-N177YT	0	FALSE	0	0.99	FALSE	1
737	332.148	12	CRH1-N177YT		1	FHNYTLDWAMDK	FHN[737]YTLDWAMDK	2	b	2	5	12	CRH1-N177YT	0	FALSE	0	0.99	FALSE	1
762	332.148	12	CRH1-N177YT		1	FHNYTLDWAMDK	FHN[762]YTLDWAMDK	2	b	2	5	12	CRH1-N177YT	0	FALSE	0	0.99	FALSE	1
787	332.148	12	CRH1-N177YT		1	FHNYTLDWAMDK	FHN[787]YTLDWAMDK	2	b	2	5	12	CRH1-N177YT	0	FALSE	0	0.99	FALSE	1
812	332.148	12	CRH1-N177YT		1	FHNYTLDWAMDK	FHN[812]YTLDWAMDK	2	b	2	5	12	CRH1-N177YT	0	FALSE	0	0.99	FALSE	1
837	332.148	12	CRH1-N177YT		1	FHNYTLDWAMDK	FHN[837]YTLDWAMDK	2	b	2	5	12	CRH1-N177YT	0	FALSE	0	0.99	FALSE	1
862	332.148	12	CRH1-N177YT		1	FHNYTLDWAMDK	FHN[862]YTLDWAMDK	2	b	2	5	12	CRH1-N177YT	0	FALSE	0	0.99	FALSE	1
887	332.148	12	CRH1-N177YT		1	FHNYTLDWAMDK	FHN[887]YTLDWAMDK	2	b	2	5	12	CRH1-N177YT	0	FALSE	0	0.99	FALSE	1
912	332.148	12	CRH1-N177YT		1	FHNYTLDWAMDK	FHN[912]YTLDWAMDK	2	b	2	5	12	CRH1-N177YT	0	FALSE	0	0.99	FALSE	1
937	332.148	12	CRH1-N177YT		1	FHNYTLDWAMDK	FHN[937]YTLDWAMDK	2	b	2	5	12	CRH1-N177YT	0	FALSE	0	0.99	FALSE	1
962	332.148	12	CRH1-N177YT		1	FHNYTLDWAMDK	FHN[962]YTLDWAMDK	2	b	2	5	12	CRH1-N177YT	0	FALSE	0	0.99	FALSE	1
987	332.148	12	CRH1-N177YT		1	FHNYTLDWAMDK	FHN[987]YTLDWAMDK	2	b	2	5	12	CRH1-N177YT	0	FALSE	0	0.99	FALSE	1
1012	332.148	12	CRH1-N177YT		1	FHNYTLDWAMDK	FHN[1012]YTLDWAMDK	2	b	2	5	12	CRH1-N177YT	0	FALSE	0	0.99	FALSE	1
1037	332.148	12	CRH1-N177YT		1	FHNYTLDWAMDK	FHN[1037]YTLDWAMDK	2	b	2	5	12	CRH1-N177YT	0	FALSE	0	0.99	FALSE	1
1062	332.148	12	CRH1-N177YT		1	FHNYTLDWAMDK	FHN[1062]YTLDWAMDK	2	b	2	5	12	CRH1-N177YT	0	FALSE	0	0.99	FALSE	1
1087	332.148	12	CRH1-N177YT		1	FHNYTLDWAMDK	FHN[1087]YTLDWAMDK	2	b	2	5	12	CRH1-N177YT	0	FALSE	0	0.99	FALSE	1
1112	332.148	12	CRH1-N177YT		1	FHNYTLDWAMDK	FHN[1112]YTLDWAMDK	2	b	2	5	12	CRH1-N177YT	0	FALSE	0	0.99	FALSE	1
1137	332.148	12	CRH1-N177YT		1	FHNYTLDWAMDK	FHN[1137]YTLDWAMDK	2	b	2	5	12	CRH1-N177YT	0	FALSE	0	0.99	FALSE	1
1162	332.148	12	CRH1-N177YT		1	FHNYTLDWAMDK	FHN[1162]YTLDWAMDK	2	b	2	5	12	CRH1-N177YT	0	FALSE	0	0.99	FALSE	1
1187	332.148	12	CRH1-N177YT		1	FHNYTLDWAMDK	FHN[1187]YTLDWAMDK	2	b	2	5	12	CRH1-N177YT	0	FALSE	0	0.99	FALSE	1
1212	332.148	12	CRH1-N177YT		1	FHNYTLDWAMDK	FHN[1212]YTLDWAMDK	2	b	2	5	12	CRH1-N177YT	0	FALSE	0	0.99	FALSE	1
1237	332.148	12	CRH1-N177YT		1	FHNYTLDWAMDK	FHN[1237]YTLDWAMDK	2	b	2	5	12	CRH1-N177YT	0	FALSE	0	0.99	FALSE	1
412.5	325.652	12	CRH1-N177YT		1	FHNYTLDWAMDK	FHN[412]YTLDWAMDK	2	y	2	5	12	CRH1-N177YT	0	FALSE	0	0.99	FALSE	1
437	325.652	12	CRH1-N177YT		1	FHNYTLDWAMDK	FHN[437]YTLDWAMDK	2	y	2	5	12	CRH1-N177YT	0	FALSE	0	0.99	FALSE	1
462	325.652	12	CRH1-N177YT		1	FHNYTLDWAMDK	FHN[462]YTLDWAMDK	2	y	2	5	12	CRH1-N177YT	0	FALSE	0	0.99	FALSE	1
487	325.652	12	CRH1-N177YT		1	FHNYTLDWAMDK	FHN[487]YTLDWAMDK	2	y	2	5	12	CRH1-N177YT	0	FALSE	0	0.99	FALSE	1
512	325.652	12	CRH1-N177YT		1	FHNYTLDWAMDK	FHN[512]YTLDWAMDK	2	y	2	5	12	CRH1-N177YT	0	FALSE	0	0.99	FALSE	1
537	325.652	12	CRH1-N177YT		1	FHNYTLDWAMDK	FHN[537]YTLDWAMDK	2	y	2	5	12	CRH1-N177YT	0	FALSE	0	0.99	FALSE	1
562	325.652	12	CRH1-N177YT		1	FHNYTLDWAMDK	FHN[562]YTLDWAMDK	2	y	2	5	12	CRH1-N177YT	0	FALSE	0	0.99	FALSE	1
587	325.652	12	CRH1-N177YT		1	FHNYTLDWAMDK	FHN[587]YTLDWAMDK	2	y	2	5	12	CRH1-N177YT	0	FALSE	0	0.99	FALSE	1
612	325.652	12	CRH1-N177YT		1	FHNYTLDWAMDK	FHN[612]YTLDWAMDK	2	y	2	5	12	CRH1-N177YT	0	FALSE	0	0.99	FALSE	1
637	325.652	12	CRH1-N177YT		1	FHNYTLDWAMDK	FHN[637]YTLDWAMDK	2	y	2	5	12	CRH1-N177YT	0	FALSE	0	0.99	FALSE	1
662	325.652	12	CRH1-N177YT		1	FHNYTLDWAMDK	FHN[662]YTLDWAMDK	2	y	2	5	12	CRH1-N177YT	0	FALSE	0	0.99	FALSE	1
687	325.652	12	CRH1-N177YT		1	FHNYTLDWAMDK	FHN[687]YTLDWAMDK	2	y	2	5	12	CRH1-N177YT	0	FALSE	0	0.99	FALSE	1
712	325.652	12	CRH1-N177YT		1	FHNYTLDWAMDK	FHN[712]YTLDWAMDK	2	y	2	5	12	CRH1-N177YT	0	FALSE	0	0.99	FALSE	1
737	325.652	12	CRH1-N177YT		1	FHNYTLDWAMDK	FHN[737]YTLDWAMDK	2	y	2	5	12	CRH1-N177YT	0	FALSE	0	0.99	FALSE	1
762	325.652	12	CRH1-N177YT		1	FHNYTLDWAMDK	FHN[762]YTLDWAMDK	2	y	2	5	12	CRH1-N177YT	0	FALSE	0	0.99	FALSE	1
787	325.652	12	CRH1-N177YT		1	FHNYTLDWAMDK	FHN[787]YTLDWAMDK	2	y	2	5	12	CRH1-N177YT	0	FALSE	0	0.99	FALSE	1
812	325.652	12	CRH1-N177YT		1	FHNYTLDWAMDK	FHN[812]YTLDWAMDK	2	y	2	5	12	CRH1-N177YT	0	FALSE	0	0.99	FALSE	1
837	325.652	12	CRH1-N177YT		1	FHNYTLDWAMDK	FHN[837]YTLDWAMDK	2	y	2	5	12	CRH1-N177YT	0	FALSE	0	0.99	FALSE	1
862	325.652	12	CRH1-N177YT		1	FHNYTLDWAMDK	FHN[862]YTLDWAMDK	2	y	2	5	12	CRH1-N177YT	0	FALSE	0	0.99	FALSE	1
887	325.652	12	CRH1-N177YT		1	FHNYTLDWAMDK	FHN[887]YTLDWAMDK	2	y	2	5	12	CRH1-N177YT	0	FALSE	0	0.99	FALSE	1
912	325.652	12	CRH1-N177YT		1	FHNYTLDWAMDK	FHN[912]YTLDWAMDK	2	y	2	5	12	CRH1-N177YT	0	FALSE	0	0.99	FALSE	1
937	325.652	12	CRH1-N177YT		1	FHNYTLDWAMDK	FHN[937]YTLDWAMDK	2	y	2	5	12	CRH1-N177YT	0	FALSE	0	0.99	FALSE	1
962	325.652	12	CRH1-N177YT		1	FHNYTLDWAMDK	FHN[962]YTLDWAMDK	2	y	2	5	12	CRH1-N177YT	0	FALSE	0	0.99	FALSE	1
987	325.652	12	CRH1-N177YT		1	FHNYTLDWAMDK	FHN[987]YTLDWAMDK	2	y	2	5	12	CRH1-N177YT	0	FALSE	0	0.99	FALSE	1
1012	325.652	12	CRH1-N177YT		1	FHNYTLDWAMDK	FHN[1012]YTLDWAMDK	2	y	2	5	12	CRH1-N177YT	0	FALSE	0	0.99	FALSE	1
1037	325.652	12	CRH1-N177YT		1	FHNYTLDWAMDK	FHN[1037]YTLDWAMDK	2	y	2	5	12	CRH1-N177YT	0	FALSE	0	0.99	FALSE	1
1062	325.652	12	CRH1-N177YT		1	FHNYTLDWAMDK	FHN[1062]YTLDWAMDK	2	y	2	5	12	CRH1-N177YT	0	FALSE	0	0.99	FALSE	1
1087	325.652	12	CRH1-N177YT		1	FHNYTLDWAMDK	FHN[1087]YTLDWAMDK	2	y	2	5	12	CRH1-N177YT	0	FALSE	0	0.99	FALSE	1
1112	325.652	12	CRH1-N177YT		1	FHNYTLDWAMDK	FHN[1112]YTLDWAMDK	2	y	2	5	12	CRH1-N177YT	0	FALSE	0	0.99	FALSE	1
1137	325.652	12	CRH1-N177YT		1	FHNYTLDWAMDK	FHN[1137]YTLDWAMDK	2	y	2	5	12	CRH1-N177YT	0	FALSE	0	0.99	FALSE	1
1162	325.652	12	CRH1-N177YT		1	FHNYTLDWAMDK	FHN[1162]YTLDWAMDK	2	y	2	5	12	CRH1-N177YT	0	FALSE	0	0.99	FALSE	1
1187	325.652	12	CRH1-N177YT		1	FHNYTLDWAMDK	FHN[1187]YTLDWAMDK	2	y	2	5	12	CRH1-N177YT	0	FALSE	0	0.99	FALSE	1
1212	325.652	12	CRH1-N177YT		1	FHNYTLDWAMDK	FHN[1212]YTLDWAMDK	2	y	2	5	12	CRH1-N177YT	0	FALSE	0	0.99	FALSE	1
1237	325.652	12	CRH1-N177YT		1	FHNYTLDWAMDK	FHN[1237]YTLDWAMDK	2	y	2	5	12	CRH1-N177YT	0	FALSE	0	0.99	FALSE	1
412.5	776.373	12	CRH1-N177YT		1	FHNYTLDWAMDK	FHN[412]YTLDWAMDK	2	b	1	6	12	CRH1-N177YT	0	FALSE	0	0.99	FALSE	1
437	776.373	12	CRH1-N177YT		1	FHNYTLDWAMDK	FHN[437]YTLDWAMDK	2	b	1	6	12	CRH1-N177YT	0	FALSE	0	0.99	FALSE	1
462	776.373	12	CRH1-N177YT		1	FHNYTLDWAMDK	FHN[462]YTLDWAMDK	2	b	1	6	12	CRH1-N177YT	0	FALSE	0	0.99	FALSE	1
487	776.373	12	CRH1-N177YT		1	FHNYTLDWAMDK	FHN[487]YTLDWAMDK	2	b	1	6	12	CRH1-N177YT	0	FALSE	0	0.99	FALSE	1
512	776.373	12	CRH1-N177YT		1	FHNYTLDWAMDK	FHN[512]YTLDWAMDK	2	b	1	6	12	CRH1-N177YT	0	FALSE	0	0.99	FALSE	1
537	776.373	12	CRH1-N177YT		1	FHNYTLDWAMDK	FHN[537]YTLDWAMDK	2	b	1	6	12	CRH1-N177YT	0	FALSE	0	0.99	FALSE	1
562	776.373	12	CRH1-N177YT		1	FHNYTLDWAMDK	FHN[562]YTLDWAMDK	2	b	1	6	12	CRH1-N177YT	0	FALSE	0	0.99	FALSE	1
587	776.373	12	CRH1-N177YT		1	FHNYTLDWAMDK	FHN[587]YTLDWAMDK	2	b	1	6	12	CRH1-N177YT	0	FALSE	0	0.99	FALSE	1
612	776.373	12	CRH1-N177YT		1	FHNYTLDWAMDK	FHN[612]YTLDWAMDK	2	b	1	6	12	CRH1-N177YT	0	FALSE	0	0.99	FALSE	1
637	776.373	12	CRH1-N177YT		1	FHNYTLDWAMDK	FHN[637]YTLDWAMDK	2	b	1	6	12	CRH1-N177YT	0	FALSE	0	0.99	FALSE	1
662	776.373	12	CRH1-N177YT		1	FHNYTLDWAMDK	FHN[662]YTLDWAMDK	2	b	1	6	12	CRH1-N177YT	0	FALSE	0	0.99	FALSE	1
687	776.373	12	CRH1-N177YT		1	FHNYTLDWAMDK	FHN[687]YTLDWAMDK	2	b	1	6	12	CRH1-N177YT	0	FALSE	0	0.99	FALSE	1
712	776.373	12	CRH1-N177YT		1	FHNYTLDWAMDK	FHN[712]YTLDWAMDK	2	b	1	6	12	CRH1-N177YT	0	FALSE	0	0.99	FALSE	1
737	776.373	12	CRH1-N177YT		1	FHNYTLDWAMDK	FHN[737]YTLDWAMDK	2	b	1	6	12	CRH1-N177YT	0	FALSE	0	0.99	FALSE	1
762	776.373	12	CRH1-N177YT		1	FHNYTLDWAMDK	FHN[762]YTLDWAMDK	2	b	1	6	12	CRH1-N177YT	0	FALSE	0	0.99	FALSE	1
787	776.373	12	CRH1-N177YT		1	FHNYTLDWAMDK	FHN[787]YTLDWAMDK	2	b	1	6	12	CRH1-N177YT	0	FALSE	0	0.99	FALSE	1
812	776.373	12	CRH1-N177YT		1	FHNYTLDWAMDK	FHN[812]YTLDWAMDK	2	b	1	6	12	CRH1-N177YT	0	FALSE	0	0.99	FALSE	1
837	776.373	12	CRH1-N177YT		1	FHNYTLDWAMDK	FHN[837]YTLDWAMDK	2	b	1	6	12	CRH1-N177YT	0	FALSE	0	0.99	FALSE	1
862	776.373	12	CRH1-N177YT		1	FHNYTLDWAMDK	FHN[862]YTLDWAMDK	2	b	1	6	12	CRH1-N177YT	0	FALSE	0	0.99	FALSE	1
887	776.373	12	CRH1-N177YT		1	FHNYTLDWAMDK	FHN[887]YTLDWAMDK	2	b	1	6	12	CRH1-N177YT	0	FALSE	0	0.99	FALSE	1
912	776.373	12	CRH1-N177YT		1	FHNYTLDWAMDK	FHN[912]YTLDWAMDK	2	b	1	6	12	CRH1-N177YT	0	FALSE	0	0.99	FALSE	1
937	776.373	12	CRH1-N177YT		1	FHNYTLDWAMDK	FHN[937]YTLDWAMDK	2	b	1	6	12	CRH1-N177YT	0	FALSE	0	0.99	FALSE	1
962	776.373	12	CRH1-N177YT		1	FHNYTLDWAMDK	FHN[962]YTLDWAMDK	2	b	1	6	12	CRH1-N177YT	0	FALSE	0	0.99	FALSE	1
987	776.373	12	CRH1-N177YT		1	FHNYTLDWAMDK	FHN[987]YTLDWAMDK	2	b	1	6	12	CRH1-N177YT	0	FALSE	0	0.99	FALSE	1
1012	776.373	12	CRH1-N177YT		1	FHNYTLDWAMDK	FHN[1012]YTLDWAMDK	2	b	1	6	12	CRH1-N177YT	0	FALSE	0	0.99	FALSE	1
1037	776.373	12	CRH1-N177YT		1	FHNYTLDWAMDK	FHN[1037]YTLDWAMDK	2	b	1	6	12	CRH1-N177YT	0	FALSE	0	0.99	FALSE	1
1062	776.373	12	CRH1-N177YT		1	FHNYTLDWAMDK	FHN[1062]YTLDWAMDK	2	b	1	6	12	CRH1-N177YT	0	FALSE	0	0.99	FALSE	1
1087	776.373	12	CRH1-N177YT		1	FHNYTLDWAMDK	FHN[1087]YTLDWAMDK	2	b	1	6	12	CRH1-N177YT	0	FALSE	0	0.99	FALSE	1
1112	776.373	12	CRH1-N177YT		1	FHNYTLDWAMDK	FHN[1112]YTLDWAMDK	2	b	1	6	12	CRH1-N177YT	0	FALSE	0	0.99	FALSE	1
1137	776.373	12	CRH1-N177YT		1	FHNYTLDWAMDK	FHN[1137]YTLDWAMDK	2	b	1	6	12	CRH1-N177YT	0	FALSE	0	0.99	FALSE	1
1162	776.373	12	CRH1-N177YT		1	FHNYTLDWAMDK	FHN[1162]YTLDWAMDK	2	b	1	6	12	CRH1-N177YT	0	FALSE	0	0.99	FALSE	1
1187	776.373	12	CRH1-N177YT		1	FHNYTLDWAMDK	FHN[1187]YTLDWAMDK	2	b	1	6	12	CRH1-N177YT	0	FALSE	0	0.99	FALSE	1
1212	776.373	12	CRH1-N177YT		1	FHNYTLDWAMDK	FHN[1212]YTLDWAMDK	2	b	1	6	12	CRH1-N177YT	0	FALSE	0	0.99	FALSE	1
1237	776.373	12	CRH1-N177YT		1	FHNYTLDWAMDK	FHN[1237]YTLDWAMDK	2	b	1	6	12	CRH1-N177YT	0	FALSE	0	0.99	FALSE	1
412.5	765.324	12	CRH1-N177YT		1	FHNYTLDWAMDK	FHN[412]YTLDWAMDK	2	y	1	6	12	CRH1-N177YT	0	FALSE	0	0.99	FALSE	1
437	765.324	12	CRH1-N177YT		1	FHNYTLDWAMDK	FHN[437]YTLDWAMDK	2	y	1	6	12	CRH1-N177YT	0	FALSE	0	0.99	FALSE	1
462	765.324	12	CRH1-N177YT		1	FHNYTLDWAMDK	FHN[462]YTLDWAMDK	2	y	1	6	12	CRH1-N177YT	0	FALSE	0	0.99	FALSE	1
487	765.324	12	CRH1-N177YT		1	FHNYTLDWAMDK	FHN[487]YTLDWAMDK	2	y	1	6	12	CRH1-N177YT	0	FALSE	0	0.99	FALSE	1
512	765.324	12	CRH1-N177YT		1	FHNYTLDWAMDK	FHN[512]YTLDWAMDK	2	y	1	6	12	CRH1-N177YT	0	FALSE	0	0.99	FALSE	1
537	765.324	12	CRH1-N177YT		1	FHNYTLDWAMDK	FHN[537]YTLDWAMDK	2	y	1	6	12	CRH1-N177YT	0	FALSE	0	0.99	FALSE	1
562	765.324	12	CRH1-N177YT		1	FHNYTLDWAMDK	FHN[562]YTLDWAMDK	2	y	1	6	12	CRH1-N177YT	0	FALSE	0	0.99	FALSE	1
587	765.324	12	CRH1-N177YT		1	FHNYTLDWAMDK	FHN[587]YTLDWAMDK	2	y	1	6	12	CRH1-N177YT	0	FALSE	0	0.99	FALSE	1
612	765.324	12	CRH1-N177YT		1	FHNYTLDWAMDK	FHN[612]YTLDWAMDK	2	y	1	6	12	CRH1-N177YT	0	FALSE	0	0.99	FALSE	1
637	765.324	12	CRH1-N177YT		1	FHNYTLDWAMDK	FHN[637]YTLDWAMDK	2	y	1	6	12	CRH1-N177YT	0	FALSE	0	0.99	FALSE	1
662	765.324	12	CRH1-N177YT		1	FHNYTLDWAMDK	FHN[662]YTLDWAMDK	2	y	1	6	12	CRH1-N177YT	0	FALSE	0	0.99	FALSE	1
687	765.324	12	CRH1-N177YT		1	FHNYTLDWAMDK	FHN[687]YTLDWAMDK	2	y	1	6	12	CRH1-N177YT	0	FALSE	0	0.99	FALSE	1
712	765.324	12	CRH1-N177YT		1	FHNYTLDWAMDK	FHN[712]YTLDWAMDK	2	y	1	6	12	CRH1-N177YT	0	FALSE	0	0.99	FALSE	1
737	765.324	12	CRH1-N177YT		1	FHNYTLDWAMDK	FHN[737]YTLDWAMDK	2	y	1	6	12	CRH1-N177YT	0	FALSE	0	0.99	FALSE	1
762	765.324	12	CRH1-N177YT		1	FHNYTLDWAMDK	FHN[762]YTLDWAMDK	2	y	1	6	12	CRH1-N177YT	0	FALSE	0	0.99	FALSE	1
787	765.324	12	CRH1-N177YT		1	FHNYTLDWAMDK	FHN[787]YTLDWAMDK	2	y	1	6	12	CRH1-N177YT	0	FALSE	0	0.99	FALSE	1
812	765.324	12	CRH1-N177YT		1	FHNYTLDWAMDK	FHN[812]YTLDWAMDK	2	y	1	6	12	CRH1-N177YT	0	FALSE	0	0.99	FALSE	1
837	765.324	12	CRH1-N177YT		1	FHNYTLDWAMDK	FHN[837]YTLDWAMDK	2	y	1	6	12	CRH1-N177YT	0	FALSE	0	0.99	FALSE	1
862	765.324	12	CRH1-N177YT		1	FHNYTLDWAMDK	FHN[862]YTLDWAMDK	2	y	1	6	12	CRH1-N177YT	0	FALSE	0	0.99	FALSE	1
887	765.324	12	CRH1-N177YT		1	FHNYTLDWAMDK	FHN[887]YTLDWAMDK	2	y	1	6	12	CRH1-N177YT	0	FALSE	0	0.99	FALSE	1
912	765.324	12	CRH1-N177YT		1	FHNYTLDWAMDK	FHN[912]YTLDWAMDK	2	y	1	6	12	CRH1-N177YT	0	FALSE	0	0.99	FALSE	1
937	765.324	12	CRH1-N177YT		1	FHNYTLDWAMDK	FHN[937]YTLDWAMDK	2	y	1	6	12	CRH1-N177YT	0	FALSE	0	0.99	FALSE	1
962	765.324	12	CRH1-N177YT		1	FHNYTLDWAMDK	FHN[962]YTLDWAMDK	2	y	1	6	12	CRH1-N177YT	0	FALSE	0	0.99	FALSE	1
987	765.324	12	CRH1-N177YT		1	FHNYTLDWAMDK	FHN[987]YTLDWAMDK	2	y	1	6	12	CRH1-N177YT	0	FALSE	0	0.99	FALSE	1
1012	765.324	12	CRH1-N177YT		1	FHNYTLDWAMDK	FHN[1012]YTLDWAMDK	2	y	1	6	12	CRH1-N177YT	0	FALSE	0	0.99	FALSE	1
1037	765.324	12	CRH1-N177YT		1	FHNYTLDWAMDK	FHN[1037]YTLDWAMDK	2	y	1	6	12	CRH1-N177YT	0	FALSE	0	0.99	FALSE	1
1062	765.324	12	CRH1-N177YT		1	FHNYTLDWAMDK	FHN[1062]YTLDWAMDK	2	y	1	6	12	CRH1-N177YT	0	FALSE	0	0.99	FALSE	1
1087	765.324	12	CRH1-N177YT		1	FHNYTLDWAMDK	FHN[1087]YTLDWAMDK	2	y	1	6	12	CRH1-N177YT	0	FALSE	0	0.99	FALSE	1
1112	765.324	12	CRH1-N177YT		1	FHNYTLDWAMDK	FHN[1112]YTLDWAMDK	2	y	1	6	12	CRH1-N177YT	0	FALSE	0	0.99	FALSE	1
1137	765.324	12	CRH1-N177YT		1	FHNYTLDWAMDK	FHN[1137]YTLDWAMDK	2	y	1	6	12	CRH1-N177YT	0	FALSE	0	0.99	FALSE	1
1162	765.324	12	CRH1-N177YT		1	FHNYTLDWAMDK	FHN[1162]YTLDWAMDK	2	y	1	6	12	CRH1-N177YT	0	FALSE	0	0.99	FALSE	1
1187	765.324	12	CRH1-N177YT		1	FHNYTLDWAMDK	FHN[1187]YTLDWAMDK	2	y	1	6	12	CRH1-N177YT	0	FALSE	0	0.99	FALSE	1
1212	765.324	12	CRH1-N177YT		1	FHNYTLDWAMDK	FHN[1212]YTLDWAMDK	2	y	1	6	12	CRH1-N177YT	0	FALSE	0	0.99	FALSE	1
1237	765.324	12	CRH1-N177YT		1	FHNYTLDWAMDK	FHN[1237]YTLDWAMDK	2	y	1	6	12	CRH1-N177YT	0	FALSE	0	0.99	FALSE	1
412.5	388.69	12	CRH1-N177YT		1	FHNYTLDWAMDK	FHN[412]YTLDWAMDK	2	b	2	6	12	CRH1-N177YT	0	FALSE	0	0.99	FALSE	1
437	388.69	12	CRH1-N177YT		1	FHNYTLDWAMDK	FHN[437]YTLDWAMDK	2	b	2	6	12	CRH1-N177YT	0	FALSE	0	0.99	FALSE	1
462	388.69	12	CRH1-N177YT		1	FHNYTLDWAMDK	FHN[462]YTLDWAMDK	2	b	2	6	12	CRH1-N177YT	0	FALSE	0	0.99	FALSE	1
487	388.69	12	CRH1-N177YT		1	FHNYTLDWAMDK	FHN[487]YTLDWAMDK	2	b	2	6	12	CRH1-N177YT	0	FALSE	0	0.99	FALSE	1
512	388.69	12	CRH1-N177YT		1	FHNYTLDWAMDK	FHN[512]YTLDWAMDK	2	b	2	6	12	CRH1-N177YT	0	FALSE	0	0.99	FALSE	1
537	388.69	12	CRH1-N177YT		1	FHNYTLDWAMDK	FHN[537]YTLDWAMDK	2	b	2	6	12	CRH1-N177YT	0	FALSE	0	0.99	FALSE	1
562	388.69	12	CRH1-N177YT		1	FHNYTLDWAMDK	FHN[562]YTLDWAMDK	2	b	2	6	12	CRH1-N177YT	0	FALSE	0	0.99	FALSE	1
587	388.69	12	CRH1-N177YT		1	FHNYTLDWAMDK	FHN[587]YTLDWAMDK	2	b	2	6	12	CRH1-N177YT	0	FALSE	0	0.99	FALSE	1
612	388.69	12	CRH1-N177YT		1	FHNYTLDWAMDK	FHN[612]YTLDWAMDK	2	b	2	6	12	CRH1-N177YT	0	FALSE	0	0.99	FALSE	1
637	388.69	12	CRH1-N177YT		1	FHNYTLDWAMDK	FHN[637]YTLDWAMDK	2	b	2	6	12	CRH1-N177YT	0	FALSE	0	0.99	FALSE	1
662	388.69	12	CRH1-N177YT		1	FHNYTLDWAMDK	FHN[662]YTLDWAMDK	2	b	2	6	12	CRH1-N177YT	0	FALSE	0	0.99	FALSE	1
687	388.69	12	CRH1-N177YT		1	FHNYTLDWAMDK	FHN[687]YTLDWAMDK	2	b	2	6	12	CRH1-N177YT	0	FALSE	0	0.99	FALSE	1
712	388.69	12	CRH1-N177YT		1	FHNYTLDWAMDK	FHN[712]YTLDWAMDK	2	b	2	6	12	CRH1-N177YT	0	FALSE	0	0.99	FALSE	1
737	388.69	12	CRH1-N177YT		1	FHNYTLDWAMDK	FHN[737]YTLDWAMDK	2	b	2	6	12	CRH1-N177YT	0	FALSE	0	0.99	FALSE	1
762	388.69	12	CRH1-N177YT		1	FHNYTLDWAMDK	FHN[762]YTLDWAMDK	2	b	2	6	12	CRH1-N177YT	0	FALSE	0	0.99	FALSE	1
787	388.69	12	CRH1-N177YT		1	FHNYTLDWAMDK	FHN[787]YTLDWAMDK	2	b	2	6	12	CRH1-N177YT	0	FALSE	0	0.99	FALSE	1
812	388.69	12	CRH1-N177YT		1	FHNYTLDWAMDK	FHN[812]YTLDWAMDK	2	b	2	6	12	CRH1-N177YT	0	FALSE	0	0.99	FALSE	1
837	388.69	12	CRH1-N177YT		1	FHNYTLDWAMDK	FHN[837]YTLDWAMDK	2	b	2	6	12	CRH1-N177YT	0	FALSE	0	0.99	FALSE	1
862	388.69	12	CRH1-N177YT		1	FHNYTLDWAMDK	FHN[862]YTLDWAMDK	2	b	2	6	12	CRH1-N177YT	0	FALSE	0	0.99	FALSE	1
887	388.69	12	CRH1-N177YT		1	FHNYTLDWAMDK	FHN[887]YTLDWAMDK	2	b	2	6	12	CRH1-N177YT	0	FALSE	0	0.99	FALSE	1
912	388.69	12	CRH1-N177YT		1	FHNYTLDWAMDK	FHN[912]YTLDWAMDK	2	b	2	6	12	CRH1-N177YT	0	FALSE	0	0.99	FALSE	1
937	388.69	12	CRH1-N177YT		1	FHNYTLDWAMDK	FHN[937]YTLDWAMDK	2	b	2	6	12	CRH1-N177YT	0	FALSE	0	0.99	FALSE	1
962	388.69	12	CRH1-N177YT		1	FHNYTLDWAMDK	FHN[962]YTLDWAMDK	2	b	2	6	12	CRH1-N177YT	0	FALSE	0	0.99	FALSE	1
987	388.69	12	CRH1-N177YT		1	FHNYTLDWAMDK	FHN[987]YTLDWAMDK	2	b	2	6	12	CRH1-N177YT	0	FALSE	0	0.99	FALSE	1
1012	388.69	12	CRH1-N177YT		1	FHNYTLDWAMDK	FHN[1012]YTLDWAMDK	2	b	2	6	12	CRH1-N177YT	0	FALSE	0	0.99	FALSE	1
1037	388.69	12	CRH1-N177YT		1	FHNYTLDWAMDK	FHN[1037]YTLDWAMDK	2	b	2	6	12	CRH1-N177YT	0	FALSE	0	0.99	FALSE	1
1062	388.69	12	CRH1-N177YT		1	FHNYTLDWAMDK	FHN[1062]YTLDWAMDK	2	b	2	6	12	CRH1-N177YT	0	FALSE	0	0.99	FALSE	1
1087	388.69	12	CRH1-N177YT		1	FHNYTLDWAMDK	FHN[1087]YTLDWAMDK	2	b	2	6	12	CRH1-N177YT	0	FALSE	0	0.99	FALSE	1
1112	388.69	12	CRH1-N177YT		1	FHNYTLDWAMDK	FHN[1112]YTLDWAMDK	2	b	2	6	12	CRH1-N177YT	0	FALSE	0	0.99	FALSE	1
1137	388.69	12	CRH1-N177YT		1	FHNYTLDWAMDK	FHN[1137]YTLDWAMDK	2	b	2	6	12	CRH1-N177YT	0	FALSE	0	0.99	FALSE	1
1162	388.69	12	CRH1-N177YT		1	FHNYTLDWAMDK	FHN[1162]YTLDWAMDK	2	b	2	6	12	CRH1-N177YT	0	FALSE	0	0.99	FALSE	1
1187	388.69	12	CRH1-N177YT		1	FHNYTLDWAMDK	FHN[1187]YTLDWAMDK	2	b	2	6	12	CRH1-N177YT	0	FALSE	0	0.99	FALSE	1
1212	388.69	12	CRH1-N177YT		1	FHNYTLDWAMDK	FHN[1212]YTLDWAMDK	2	b	2	6	12	CRH1-N177YT	0	FALSE	0	0.99	FALSE	1
1237	388.69	12	CRH1-N177YT		1	FHNYTLDWAMDK	FHN[1237]YTLDWAMDK	2	b	2	6	12	CRH1-N177YT	0	FALSE	0	0.99	FALSE	1
412.5	383.165	12	CRH1-N177YT		1	FHNYTLDWAMDK	FHN[412]YTLDWAMDK	2	y	2	6	12	CRH1-N177YT	0	FALSE	0	0.99	FALSE	1
437	383.165	12	CRH1-N177YT		1	FHNYTLDWAMDK	FHN[437]YTLDWAMDK	2	y	2	6	12	CRH1-N177YT	0	FALSE	0	0.99	FALSE	1
462	383.165	12	CRH1-N177YT		1	FHNYTLDWAMDK	FHN[462]YTLDWAMDK	2	y	2	6	12	CRH1-N177YT	0	FALSE	0	0.99	FALSE	1
487	383.165	12	CRH1-N177YT		1	FHNYTLDWAMDK	FHN[487]YTLDWAMDK	2	y	2	6	12	CRH1-N177YT	0	FALSE	0	0.99	FALSE	1
512	383.165	12	CRH1-N177YT		1	FHNYTLDWAMDK	FHN[512]YTLDWAMDK	2	y	2	6	12	CRH1-N177YT	0	FALSE	0	0.99	FALSE	1
537	383.165	12	CRH1-N177YT		1	FHNYTLDWAMDK	FHN[537]YTLDWAMDK	2	y	2	6	12	CRH1-N177YT	0	FALSE	0	0.99	FALSE	1
562	383.165	12	CRH1-N177YT		1	FHNYTLDWAMDK	FHN[562]YTLDWAMDK	2	y	2	6	12	CRH1-N177YT	0	FALSE	0	0.99	FALSE	1
587	383.165	12	CRH1-N177YT		1	FHNYTLDWAMDK	FHN[587]YTLDWAMDK	2	y	2	6	12	CRH1-N177YT	0	FALSE	0	0.99	FALSE	1
612	383.165	12	CRH1-N177YT		1	FHNYTLDWAMDK	FHN[612]YTLDWAMDK	2	y	2	6	12	CRH1-N177YT	0	FALSE	0	0.99	FALSE	1
637	383.165	12	CRH1-N177YT		1	FHNYTLDWAMDK	FHN[637]YTLDWAMDK	2	y	2	6	12	CRH1-N177YT	0	FALSE	0	0.99	FALSE	1
662	383.165	12	CRH1-N177YT		1	FHNYTLDWAMDK	FHN[662]YTLDWAMDK	2	y	2	6	12	CRH1-N177YT	0	FALSE	0	0.99	FALSE	1
687	383.165	12	CRH1-N177YT		1	FHNYTLDWAMDK	FHN[687]YTLDWAMDK	2	y	2	6	12	CRH1-N177YT	0	FALSE	0	0.99	FALSE	1
712	383.165	12	CRH1-N177YT		1	FHNYTLDWAMDK	FHN[712]YTLDWAMDK	2	y	2	6	12	CRH1-N177YT	0	FALSE	0	0.99	FALSE	1
737	383.165	12	CRH1-N177YT		1	FHNYTLDWAMDK	FHN[737]YTLDWAMDK	2	y	2	6	12	CRH1-N177YT	0	FALSE	0	0.99	FALSE	1
762	383.165	12	CRH1-N177YT		1	FHNYTLDWAMDK	FHN[762]YTLDWAMDK	2	y	2	6	12	CRH1-N177YT	0	FALSE	0	0.99	FALSE	1
787	383.165	12	CRH1-N177YT		1	FHNYTLDWAMDK	FHN[787]YTLDWAMDK	2	y	2	6	12	CRH1-N177YT	0	FALSE	0	0.99	FALSE	1
812	383.165	12	CRH1-N177YT		1	FHNYTLDWAMDK	FHN[812]YTLDWAMDK	2	y	2	6	12	CRH1-N177YT	0	FALSE	0	0.99	FALSE	1
837	383.165	12	CRH1-N177YT		1	FHNYTLDWAMDK	FHN[837]YTLDWAMDK	2	y	2	6	12	CRH1-N177YT	0	FALSE	0	0.99	FALSE	1
862	383.165	12	CRH1-N177YT		1	FHNYTLDWAMDK	FHN[862]YTLDWAMDK	2	y	2	6	12	CRH1-N177YT	0	FALSE	0	0.99	FALSE	1
887	383.165	12	CRH1-N177YT		1	FHNYTLDWAMDK	FHN[887]YTLDWAMDK	2	y	2	6	12	CRH1-N177YT	0	FALSE	0	0.99	FALSE	1
912	383.165	12	CRH1-N177YT		1	FHNYTLDWAMDK	FHN[912]YTLDWAMDK	2	y	2	6	12	CRH1-N177YT	0	FALSE	0	0.99	FALSE	1
[truncated: 14,905 more rows]

## Sheet: Supplementary Table S5_stoby
Q1	Q3	RT_detected	protein_name	isotype	relative_intensity	stripped_sequence	modification_sequence	prec_z	frg_type	frg_z	frg_nr	iRT	uniprot_id	score	decoy	prec_y	confidence	shared	N	rank	mods	nterm	cterm
[truncated: 7,650 more rows]

[truncated: 1 more sheets: Supplementary Table S5_stobyY]
