# Supplementary material for: DIALib: an automated ion library generator for data independent acquisition mass spectrometry analysis of peptides and glycopeptides
Source: bioRxiv preprint, doi:10.1101/696518, version 2 (2020-01-21)
Supplement: Supplementary Table S7 [file 696518_file07.xlsx]

## Sheet: Supplementary Table 4b-stopby
Q1	Q3	RT_detected	protein_name	isotype	relative_intensity	stripped_sequence	modification_sequence	prec_z	frg_type	frg_z	frg_nr	iRT	uniprot_id	score	decoy	prec_y	confidence	shared	N	rank	mods	nterm	cterm
412.5	248.161	7.85	GAS3-N350VS		1	NVSLPTTK	NVSLPTTK[412]	2	y	1	2	7.85	GAS3-N350VS	0	FALSE	0	0.99	FALSE	1
437	248.161	8.52	GAS3-N350VS		1	NVSLPTTK	NVSLPTTK[437]	2	y	1	2	8.52	GAS3-N350VS	0	FALSE	0	0.99	FALSE	1
462	248.161	7.85	GAS3-N350VS		1	NVSLPTTK	NVSLPTTK[462]	2	y	1	2	7.85	GAS3-N350VS	0	FALSE	0	0.99	FALSE	1
487	248.161	7.85	GAS3-N350VS		1	NVSLPTTK	NVSLPTTK[487]	2	y	1	2	7.85	GAS3-N350VS	0	FALSE	0	0.99	FALSE	1
512	248.161	7.85	GAS3-N350VS		1	NVSLPTTK	NVSLPTTK[512]	2	y	1	2	7.85	GAS3-N350VS	0	FALSE	0	0.99	FALSE	1
537	248.161	7.85	GAS3-N350VS		1	NVSLPTTK	NVSLPTTK[537]	2	y	1	2	7.85	GAS3-N350VS	0	FALSE	0	0.99	FALSE	1
562	248.161	7.85	GAS3-N350VS		1	NVSLPTTK	NVSLPTTK[562]	2	y	1	2	7.85	GAS3-N350VS	0	FALSE	0	0.99	FALSE	1
587	248.161	7.85	GAS3-N350VS		1	NVSLPTTK	NVSLPTTK[587]	2	y	1	2	7.85	GAS3-N350VS	0	FALSE	0	0.99	FALSE	1
612	248.161	7.85	GAS3-N350VS		1	NVSLPTTK	NVSLPTTK[612]	2	y	1	2	7.85	GAS3-N350VS	0	FALSE	0	0.99	FALSE	1
637	248.161	7.85	GAS3-N350VS		1	NVSLPTTK	NVSLPTTK[637]	2	y	1	2	7.85	GAS3-N350VS	0	FALSE	0	0.99	FALSE	1
662	248.161	7.85	GAS3-N350VS		1	NVSLPTTK	NVSLPTTK[662]	2	y	1	2	7.85	GAS3-N350VS	0	FALSE	0	0.99	FALSE	1
687	248.161	7.85	GAS3-N350VS		1	NVSLPTTK	NVSLPTTK[687]	2	y	1	2	7.85	GAS3-N350VS	0	FALSE	0	0.99	FALSE	1
712	248.161	7.85	GAS3-N350VS		1	NVSLPTTK	NVSLPTTK[712]	2	y	1	2	7.85	GAS3-N350VS	0	FALSE	0	0.99	FALSE	1
737	248.161	7.85	GAS3-N350VS		1	NVSLPTTK	NVSLPTTK[737]	2	y	1	2	7.85	GAS3-N350VS	0	FALSE	0	0.99	FALSE	1
762	248.161	7.85	GAS3-N350VS		1	NVSLPTTK	NVSLPTTK[762]	2	y	1	2	7.85	GAS3-N350VS	0	FALSE	0	0.99	FALSE	1
787	248.161	7.85	GAS3-N350VS		1	NVSLPTTK	NVSLPTTK[787]	2	y	1	2	7.85	GAS3-N350VS	0	FALSE	0	0.99	FALSE	1
812	248.161	7.85	GAS3-N350VS		1	NVSLPTTK	NVSLPTTK[812]	2	y	1	2	7.85	GAS3-N350VS	0	FALSE	0	0.99	FALSE	1
837	248.161	7.85	GAS3-N350VS		1	NVSLPTTK	NVSLPTTK[837]	2	y	1	2	7.85	GAS3-N350VS	0	FALSE	0	0.99	FALSE	1
862	248.161	7.85	GAS3-N350VS		1	NVSLPTTK	NVSLPTTK[862]	2	y	1	2	7.85	GAS3-N350VS	0	FALSE	0	0.99	FALSE	1
887	248.161	7.85	GAS3-N350VS		1	NVSLPTTK	NVSLPTTK[887]	2	y	1	2	7.85	GAS3-N350VS	0	FALSE	0	0.99	FALSE	1
912	248.161	7.85	GAS3-N350VS		1	NVSLPTTK	NVSLPTTK[912]	2	y	1	2	7.85	GAS3-N350VS	0	FALSE	0	0.99	FALSE	1
937	248.161	7.85	GAS3-N350VS		1	NVSLPTTK	NVSLPTTK[937]	2	y	1	2	7.85	GAS3-N350VS	0	FALSE	0	0.99	FALSE	1
962	248.161	7.85	GAS3-N350VS		1	NVSLPTTK	NVSLPTTK[962]	2	y	1	2	7.85	GAS3-N350VS	0	FALSE	0	0.99	FALSE	1
987	248.161	7.85	GAS3-N350VS		1	NVSLPTTK	NVSLPTTK[987]	2	y	1	2	7.85	GAS3-N350VS	0	FALSE	0	0.99	FALSE	1
1012	248.161	7.85	GAS3-N350VS		1	NVSLPTTK	NVSLPTTK[1012]	2	y	1	2	7.85	GAS3-N350VS	0	FALSE	0	0.99	FALSE	1
1037	248.161	7.85	GAS3-N350VS		1	NVSLPTTK	NVSLPTTK[1037]	2	y	1	2	7.85	GAS3-N350VS	0	FALSE	0	0.99	FALSE	1
1062	248.161	7.85	GAS3-N350VS		1	NVSLPTTK	NVSLPTTK[1062]	2	y	1	2	7.85	GAS3-N350VS	0	FALSE	0	0.99	FALSE	1
1087	248.161	7.85	GAS3-N350VS		1	NVSLPTTK	NVSLPTTK[1087]	2	y	1	2	7.85	GAS3-N350VS	0	FALSE	0	0.99	FALSE	1
1112	248.161	7.85	GAS3-N350VS		1	NVSLPTTK	NVSLPTTK[1112]	2	y	1	2	7.85	GAS3-N350VS	0	FALSE	0	0.99	FALSE	1
1137	248.161	7.85	GAS3-N350VS		1	NVSLPTTK	NVSLPTTK[1137]	2	y	1	2	7.85	GAS3-N350VS	0	FALSE	0	0.99	FALSE	1
1162	248.161	7.85	GAS3-N350VS		1	NVSLPTTK	NVSLPTTK[1162]	2	y	1	2	7.85	GAS3-N350VS	0	FALSE	0	0.99	FALSE	1
1187	248.161	7.85	GAS3-N350VS		1	NVSLPTTK	NVSLPTTK[1187]	2	y	1	2	7.85	GAS3-N350VS	0	FALSE	0	0.99	FALSE	1
1212	248.161	7.85	GAS3-N350VS		1	NVSLPTTK	NVSLPTTK[1212]	2	y	1	2	7.85	GAS3-N350VS	0	FALSE	0	0.99	FALSE	1
1237	248.161	7.85	GAS3-N350VS		1	NVSLPTTK	NVSLPTTK[1237]	2	y	1	2	7.85	GAS3-N350VS	0	FALSE	0	0.99	FALSE	1
412.5	124.584	7.85	GAS3-N350VS		1	NVSLPTTK	NVSLPTTK[412]	2	y	2	2	7.85	GAS3-N350VS	0	FALSE	0	0.99	FALSE	1
437	124.584	8.52	GAS3-N350VS		1	NVSLPTTK	NVSLPTTK[437]	2	y	2	2	8.52	GAS3-N350VS	0	FALSE	0	0.99	FALSE	1
462	124.584	7.85	GAS3-N350VS		1	NVSLPTTK	NVSLPTTK[462]	2	y	2	2	7.85	GAS3-N350VS	0	FALSE	0	0.99	FALSE	1
487	124.584	7.85	GAS3-N350VS		1	NVSLPTTK	NVSLPTTK[487]	2	y	2	2	7.85	GAS3-N350VS	0	FALSE	0	0.99	FALSE	1
512	124.584	7.85	GAS3-N350VS		1	NVSLPTTK	NVSLPTTK[512]	2	y	2	2	7.85	GAS3-N350VS	0	FALSE	0	0.99	FALSE	1
537	124.584	7.85	GAS3-N350VS		1	NVSLPTTK	NVSLPTTK[537]	2	y	2	2	7.85	GAS3-N350VS	0	FALSE	0	0.99	FALSE	1
562	124.584	7.85	GAS3-N350VS		1	NVSLPTTK	NVSLPTTK[562]	2	y	2	2	7.85	GAS3-N350VS	0	FALSE	0	0.99	FALSE	1
587	124.584	7.85	GAS3-N350VS		1	NVSLPTTK	NVSLPTTK[587]	2	y	2	2	7.85	GAS3-N350VS	0	FALSE	0	0.99	FALSE	1
612	124.584	7.85	GAS3-N350VS		1	NVSLPTTK	NVSLPTTK[612]	2	y	2	2	7.85	GAS3-N350VS	0	FALSE	0	0.99	FALSE	1
637	124.584	7.85	GAS3-N350VS		1	NVSLPTTK	NVSLPTTK[637]	2	y	2	2	7.85	GAS3-N350VS	0	FALSE	0	0.99	FALSE	1
662	124.584	7.85	GAS3-N350VS		1	NVSLPTTK	NVSLPTTK[662]	2	y	2	2	7.85	GAS3-N350VS	0	FALSE	0	0.99	FALSE	1
687	124.584	7.85	GAS3-N350VS		1	NVSLPTTK	NVSLPTTK[687]	2	y	2	2	7.85	GAS3-N350VS	0	FALSE	0	0.99	FALSE	1
712	124.584	7.85	GAS3-N350VS		1	NVSLPTTK	NVSLPTTK[712]	2	y	2	2	7.85	GAS3-N350VS	0	FALSE	0	0.99	FALSE	1
737	124.584	7.85	GAS3-N350VS		1	NVSLPTTK	NVSLPTTK[737]	2	y	2	2	7.85	GAS3-N350VS	0	FALSE	0	0.99	FALSE	1
762	124.584	7.85	GAS3-N350VS		1	NVSLPTTK	NVSLPTTK[762]	2	y	2	2	7.85	GAS3-N350VS	0	FALSE	0	0.99	FALSE	1
787	124.584	7.85	GAS3-N350VS		1	NVSLPTTK	NVSLPTTK[787]	2	y	2	2	7.85	GAS3-N350VS	0	FALSE	0	0.99	FALSE	1
812	124.584	7.85	GAS3-N350VS		1	NVSLPTTK	NVSLPTTK[812]	2	y	2	2	7.85	GAS3-N350VS	0	FALSE	0	0.99	FALSE	1
837	124.584	7.85	GAS3-N350VS		1	NVSLPTTK	NVSLPTTK[837]	2	y	2	2	7.85	GAS3-N350VS	0	FALSE	0	0.99	FALSE	1
862	124.584	7.85	GAS3-N350VS		1	NVSLPTTK	NVSLPTTK[862]	2	y	2	2	7.85	GAS3-N350VS	0	FALSE	0	0.99	FALSE	1
887	124.584	7.85	GAS3-N350VS		1	NVSLPTTK	NVSLPTTK[887]	2	y	2	2	7.85	GAS3-N350VS	0	FALSE	0	0.99	FALSE	1
912	124.584	7.85	GAS3-N350VS		1	NVSLPTTK	NVSLPTTK[912]	2	y	2	2	7.85	GAS3-N350VS	0	FALSE	0	0.99	FALSE	1
937	124.584	7.85	GAS3-N350VS		1	NVSLPTTK	NVSLPTTK[937]	2	y	2	2	7.85	GAS3-N350VS	0	FALSE	0	0.99	FALSE	1
962	124.584	7.85	GAS3-N350VS		1	NVSLPTTK	NVSLPTTK[962]	2	y	2	2	7.85	GAS3-N350VS	0	FALSE	0	0.99	FALSE	1
987	124.584	7.85	GAS3-N350VS		1	NVSLPTTK	NVSLPTTK[987]	2	y	2	2	7.85	GAS3-N350VS	0	FALSE	0	0.99	FALSE	1
1012	124.584	7.85	GAS3-N350VS		1	NVSLPTTK	NVSLPTTK[1012]	2	y	2	2	7.85	GAS3-N350VS	0	FALSE	0	0.99	FALSE	1
1037	124.584	7.85	GAS3-N350VS		1	NVSLPTTK	NVSLPTTK[1037]	2	y	2	2	7.85	GAS3-N350VS	0	FALSE	0	0.99	FALSE	1
1062	124.584	7.85	GAS3-N350VS		1	NVSLPTTK	NVSLPTTK[1062]	2	y	2	2	7.85	GAS3-N350VS	0	FALSE	0	0.99	FALSE	1
1087	124.584	7.85	GAS3-N350VS		1	NVSLPTTK	NVSLPTTK[1087]	2	y	2	2	7.85	GAS3-N350VS	0	FALSE	0	0.99	FALSE	1
1112	124.584	7.85	GAS3-N350VS		1	NVSLPTTK	NVSLPTTK[1112]	2	y	2	2	7.85	GAS3-N350VS	0	FALSE	0	0.99	FALSE	1
1137	124.584	7.85	GAS3-N350VS		1	NVSLPTTK	NVSLPTTK[1137]	2	y	2	2	7.85	GAS3-N350VS	0	FALSE	0	0.99	FALSE	1
1162	124.584	7.85	GAS3-N350VS		1	NVSLPTTK	NVSLPTTK[1162]	2	y	2	2	7.85	GAS3-N350VS	0	FALSE	0	0.99	FALSE	1
1187	124.584	7.85	GAS3-N350VS		1	NVSLPTTK	NVSLPTTK[1187]	2	y	2	2	7.85	GAS3-N350VS	0	FALSE	0	0.99	FALSE	1
1212	124.584	7.85	GAS3-N350VS		1	NVSLPTTK	NVSLPTTK[1212]	2	y	2	2	7.85	GAS3-N350VS	0	FALSE	0	0.99	FALSE	1
1237	124.584	7.85	GAS3-N350VS		1	NVSLPTTK	NVSLPTTK[1237]	2	y	2	2	7.85	GAS3-N350VS	0	FALSE	0	0.99	FALSE	1
412.5	349.208	7.85	GAS3-N350VS		1	NVSLPTTK	NVSLPTTK[412]	2	y	1	3	7.85	GAS3-N350VS	0	FALSE	0	0.99	FALSE	1
437	349.208	8.52	GAS3-N350VS		1	NVSLPTTK	NVSLPTTK[437]	2	y	1	3	8.52	GAS3-N350VS	0	FALSE	0	0.99	FALSE	1
462	349.208	7.85	GAS3-N350VS		1	NVSLPTTK	NVSLPTTK[462]	2	y	1	3	7.85	GAS3-N350VS	0	FALSE	0	0.99	FALSE	1
487	349.208	7.85	GAS3-N350VS		1	NVSLPTTK	NVSLPTTK[487]	2	y	1	3	7.85	GAS3-N350VS	0	FALSE	0	0.99	FALSE	1
512	349.208	7.85	GAS3-N350VS		1	NVSLPTTK	NVSLPTTK[512]	2	y	1	3	7.85	GAS3-N350VS	0	FALSE	0	0.99	FALSE	1
537	349.208	7.85	GAS3-N350VS		1	NVSLPTTK	NVSLPTTK[537]	2	y	1	3	7.85	GAS3-N350VS	0	FALSE	0	0.99	FALSE	1
562	349.208	7.85	GAS3-N350VS		1	NVSLPTTK	NVSLPTTK[562]	2	y	1	3	7.85	GAS3-N350VS	0	FALSE	0	0.99	FALSE	1
587	349.208	7.85	GAS3-N350VS		1	NVSLPTTK	NVSLPTTK[587]	2	y	1	3	7.85	GAS3-N350VS	0	FALSE	0	0.99	FALSE	1
612	349.208	7.85	GAS3-N350VS		1	NVSLPTTK	NVSLPTTK[612]	2	y	1	3	7.85	GAS3-N350VS	0	FALSE	0	0.99	FALSE	1
637	349.208	7.85	GAS3-N350VS		1	NVSLPTTK	NVSLPTTK[637]	2	y	1	3	7.85	GAS3-N350VS	0	FALSE	0	0.99	FALSE	1
662	349.208	7.85	GAS3-N350VS		1	NVSLPTTK	NVSLPTTK[662]	2	y	1	3	7.85	GAS3-N350VS	0	FALSE	0	0.99	FALSE	1
687	349.208	7.85	GAS3-N350VS		1	NVSLPTTK	NVSLPTTK[687]	2	y	1	3	7.85	GAS3-N350VS	0	FALSE	0	0.99	FALSE	1
712	349.208	7.85	GAS3-N350VS		1	NVSLPTTK	NVSLPTTK[712]	2	y	1	3	7.85	GAS3-N350VS	0	FALSE	0	0.99	FALSE	1
737	349.208	7.85	GAS3-N350VS		1	NVSLPTTK	NVSLPTTK[737]	2	y	1	3	7.85	GAS3-N350VS	0	FALSE	0	0.99	FALSE	1
762	349.208	7.85	GAS3-N350VS		1	NVSLPTTK	NVSLPTTK[762]	2	y	1	3	7.85	GAS3-N350VS	0	FALSE	0	0.99	FALSE	1
787	349.208	7.85	GAS3-N350VS		1	NVSLPTTK	NVSLPTTK[787]	2	y	1	3	7.85	GAS3-N350VS	0	FALSE	0	0.99	FALSE	1
812	349.208	7.85	GAS3-N350VS		1	NVSLPTTK	NVSLPTTK[812]	2	y	1	3	7.85	GAS3-N350VS	0	FALSE	0	0.99	FALSE	1
837	349.208	7.85	GAS3-N350VS		1	NVSLPTTK	NVSLPTTK[837]	2	y	1	3	7.85	GAS3-N350VS	0	FALSE	0	0.99	FALSE	1
862	349.208	7.85	GAS3-N350VS		1	NVSLPTTK	NVSLPTTK[862]	2	y	1	3	7.85	GAS3-N350VS	0	FALSE	0	0.99	FALSE	1
887	349.208	7.85	GAS3-N350VS		1	NVSLPTTK	NVSLPTTK[887]	2	y	1	3	7.85	GAS3-N350VS	0	FALSE	0	0.99	FALSE	1
912	349.208	7.85	GAS3-N350VS		1	NVSLPTTK	NVSLPTTK[912]	2	y	1	3	7.85	GAS3-N350VS	0	FALSE	0	0.99	FALSE	1
937	349.208	7.85	GAS3-N350VS		1	NVSLPTTK	NVSLPTTK[937]	2	y	1	3	7.85	GAS3-N350VS	0	FALSE	0	0.99	FALSE	1
962	349.208	7.85	GAS3-N350VS		1	NVSLPTTK	NVSLPTTK[962]	2	y	1	3	7.85	GAS3-N350VS	0	FALSE	0	0.99	FALSE	1
987	349.208	7.85	GAS3-N350VS		1	NVSLPTTK	NVSLPTTK[987]	2	y	1	3	7.85	GAS3-N350VS	0	FALSE	0	0.99	FALSE	1
1012	349.208	7.85	GAS3-N350VS		1	NVSLPTTK	NVSLPTTK[1012]	2	y	1	3	7.85	GAS3-N350VS	0	FALSE	0	0.99	FALSE	1
1037	349.208	7.85	GAS3-N350VS		1	NVSLPTTK	NVSLPTTK[1037]	2	y	1	3	7.85	GAS3-N350VS	0	FALSE	0	0.99	FALSE	1
1062	349.208	7.85	GAS3-N350VS		1	NVSLPTTK	NVSLPTTK[1062]	2	y	1	3	7.85	GAS3-N350VS	0	FALSE	0	0.99	FALSE	1
1087	349.208	7.85	GAS3-N350VS		1	NVSLPTTK	NVSLPTTK[1087]	2	y	1	3	7.85	GAS3-N350VS	0	FALSE	0	0.99	FALSE	1
1112	349.208	7.85	GAS3-N350VS		1	NVSLPTTK	NVSLPTTK[1112]	2	y	1	3	7.85	GAS3-N350VS	0	FALSE	0	0.99	FALSE	1
1137	349.208	7.85	GAS3-N350VS		1	NVSLPTTK	NVSLPTTK[1137]	2	y	1	3	7.85	GAS3-N350VS	0	FALSE	0	0.99	FALSE	1
1162	349.208	7.85	GAS3-N350VS		1	NVSLPTTK	NVSLPTTK[1162]	2	y	1	3	7.85	GAS3-N350VS	0	FALSE	0	0.99	FALSE	1
1187	349.208	7.85	GAS3-N350VS		1	NVSLPTTK	NVSLPTTK[1187]	2	y	1	3	7.85	GAS3-N350VS	0	FALSE	0	0.99	FALSE	1
1212	349.208	7.85	GAS3-N350VS		1	NVSLPTTK	NVSLPTTK[1212]	2	y	1	3	7.85	GAS3-N350VS	0	FALSE	0	0.99	FALSE	1
1237	349.208	7.85	GAS3-N350VS		1	NVSLPTTK	NVSLPTTK[1237]	2	y	1	3	7.85	GAS3-N350VS	0	FALSE	0	0.99	FALSE	1
412.5	175.108	7.85	GAS3-N350VS		1	NVSLPTTK	NVSLPTTK[412]	2	y	2	3	7.85	GAS3-N350VS	0	FALSE	0	0.99	FALSE	1
437	175.108	8.52	GAS3-N350VS		1	NVSLPTTK	NVSLPTTK[437]	2	y	2	3	8.52	GAS3-N350VS	0	FALSE	0	0.99	FALSE	1
462	175.108	7.85	GAS3-N350VS		1	NVSLPTTK	NVSLPTTK[462]	2	y	2	3	7.85	GAS3-N350VS	0	FALSE	0	0.99	FALSE	1
487	175.108	7.85	GAS3-N350VS		1	NVSLPTTK	NVSLPTTK[487]	2	y	2	3	7.85	GAS3-N350VS	0	FALSE	0	0.99	FALSE	1
512	175.108	7.85	GAS3-N350VS		1	NVSLPTTK	NVSLPTTK[512]	2	y	2	3	7.85	GAS3-N350VS	0	FALSE	0	0.99	FALSE	1
537	175.108	7.85	GAS3-N350VS		1	NVSLPTTK	NVSLPTTK[537]	2	y	2	3	7.85	GAS3-N350VS	0	FALSE	0	0.99	FALSE	1
562	175.108	7.85	GAS3-N350VS		1	NVSLPTTK	NVSLPTTK[562]	2	y	2	3	7.85	GAS3-N350VS	0	FALSE	0	0.99	FALSE	1
587	175.108	7.85	GAS3-N350VS		1	NVSLPTTK	NVSLPTTK[587]	2	y	2	3	7.85	GAS3-N350VS	0	FALSE	0	0.99	FALSE	1
612	175.108	7.85	GAS3-N350VS		1	NVSLPTTK	NVSLPTTK[612]	2	y	2	3	7.85	GAS3-N350VS	0	FALSE	0	0.99	FALSE	1
637	175.108	7.85	GAS3-N350VS		1	NVSLPTTK	NVSLPTTK[637]	2	y	2	3	7.85	GAS3-N350VS	0	FALSE	0	0.99	FALSE	1
662	175.108	7.85	GAS3-N350VS		1	NVSLPTTK	NVSLPTTK[662]	2	y	2	3	7.85	GAS3-N350VS	0	FALSE	0	0.99	FALSE	1
687	175.108	7.85	GAS3-N350VS		1	NVSLPTTK	NVSLPTTK[687]	2	y	2	3	7.85	GAS3-N350VS	0	FALSE	0	0.99	FALSE	1
712	175.108	7.85	GAS3-N350VS		1	NVSLPTTK	NVSLPTTK[712]	2	y	2	3	7.85	GAS3-N350VS	0	FALSE	0	0.99	FALSE	1
737	175.108	7.85	GAS3-N350VS		1	NVSLPTTK	NVSLPTTK[737]	2	y	2	3	7.85	GAS3-N350VS	0	FALSE	0	0.99	FALSE	1
762	175.108	7.85	GAS3-N350VS		1	NVSLPTTK	NVSLPTTK[762]	2	y	2	3	7.85	GAS3-N350VS	0	FALSE	0	0.99	FALSE	1
787	175.108	7.85	GAS3-N350VS		1	NVSLPTTK	NVSLPTTK[787]	2	y	2	3	7.85	GAS3-N350VS	0	FALSE	0	0.99	FALSE	1
812	175.108	7.85	GAS3-N350VS		1	NVSLPTTK	NVSLPTTK[812]	2	y	2	3	7.85	GAS3-N350VS	0	FALSE	0	0.99	FALSE	1
837	175.108	7.85	GAS3-N350VS		1	NVSLPTTK	NVSLPTTK[837]	2	y	2	3	7.85	GAS3-N350VS	0	FALSE	0	0.99	FALSE	1
862	175.108	7.85	GAS3-N350VS		1	NVSLPTTK	NVSLPTTK[862]	2	y	2	3	7.85	GAS3-N350VS	0	FALSE	0	0.99	FALSE	1
887	175.108	7.85	GAS3-N350VS		1	NVSLPTTK	NVSLPTTK[887]	2	y	2	3	7.85	GAS3-N350VS	0	FALSE	0	0.99	FALSE	1
912	175.108	7.85	GAS3-N350VS		1	NVSLPTTK	NVSLPTTK[912]	2	y	2	3	7.85	GAS3-N350VS	0	FALSE	0	0.99	FALSE	1
937	175.108	7.85	GAS3-N350VS		1	NVSLPTTK	NVSLPTTK[937]	2	y	2	3	7.85	GAS3-N350VS	0	FALSE	0	0.99	FALSE	1
962	175.108	7.85	GAS3-N350VS		1	NVSLPTTK	NVSLPTTK[962]	2	y	2	3	7.85	GAS3-N350VS	0	FALSE	0	0.99	FALSE	1
987	175.108	7.85	GAS3-N350VS		1	NVSLPTTK	NVSLPTTK[987]	2	y	2	3	7.85	GAS3-N350VS	0	FALSE	0	0.99	FALSE	1
1012	175.108	7.85	GAS3-N350VS		1	NVSLPTTK	NVSLPTTK[1012]	2	y	2	3	7.85	GAS3-N350VS	0	FALSE	0	0.99	FALSE	1
1037	175.108	7.85	GAS3-N350VS		1	NVSLPTTK	NVSLPTTK[1037]	2	y	2	3	7.85	GAS3-N350VS	0	FALSE	0	0.99	FALSE	1
1062	175.108	7.85	GAS3-N350VS		1	NVSLPTTK	NVSLPTTK[1062]	2	y	2	3	7.85	GAS3-N350VS	0	FALSE	0	0.99	FALSE	1
1087	175.108	7.85	GAS3-N350VS		1	NVSLPTTK	NVSLPTTK[1087]	2	y	2	3	7.85	GAS3-N350VS	0	FALSE	0	0.99	FALSE	1
1112	175.108	7.85	GAS3-N350VS		1	NVSLPTTK	NVSLPTTK[1112]	2	y	2	3	7.85	GAS3-N350VS	0	FALSE	0	0.99	FALSE	1
1137	175.108	7.85	GAS3-N350VS		1	NVSLPTTK	NVSLPTTK[1137]	2	y	2	3	7.85	GAS3-N350VS	0	FALSE	0	0.99	FALSE	1
1162	175.108	7.85	GAS3-N350VS		1	NVSLPTTK	NVSLPTTK[1162]	2	y	2	3	7.85	GAS3-N350VS	0	FALSE	0	0.99	FALSE	1
1187	175.108	7.85	GAS3-N350VS		1	NVSLPTTK	NVSLPTTK[1187]	2	y	2	3	7.85	GAS3-N350VS	0	FALSE	0	0.99	FALSE	1
1212	175.108	7.85	GAS3-N350VS		1	NVSLPTTK	NVSLPTTK[1212]	2	y	2	3	7.85	GAS3-N350VS	0	FALSE	0	0.99	FALSE	1
1237	175.108	7.85	GAS3-N350VS		1	NVSLPTTK	NVSLPTTK[1237]	2	y	2	3	7.85	GAS3-N350VS	0	FALSE	0	0.99	FALSE	1
412.5	446.261	7.85	GAS3-N350VS		1	NVSLPTTK	NVSLPTTK[412]	2	y	1	4	7.85	GAS3-N350VS	0	FALSE	0	0.99	FALSE	1
437	446.261	8.52	GAS3-N350VS		1	NVSLPTTK	NVSLPTTK[437]	2	y	1	4	8.52	GAS3-N350VS	0	FALSE	0	0.99	FALSE	1
462	446.261	7.85	GAS3-N350VS		1	NVSLPTTK	NVSLPTTK[462]	2	y	1	4	7.85	GAS3-N350VS	0	FALSE	0	0.99	FALSE	1
487	446.261	7.85	GAS3-N350VS		1	NVSLPTTK	NVSLPTTK[487]	2	y	1	4	7.85	GAS3-N350VS	0	FALSE	0	0.99	FALSE	1
512	446.261	7.85	GAS3-N350VS		1	NVSLPTTK	NVSLPTTK[512]	2	y	1	4	7.85	GAS3-N350VS	0	FALSE	0	0.99	FALSE	1
537	446.261	7.85	GAS3-N350VS		1	NVSLPTTK	NVSLPTTK[537]	2	y	1	4	7.85	GAS3-N350VS	0	FALSE	0	0.99	FALSE	1
562	446.261	7.85	GAS3-N350VS		1	NVSLPTTK	NVSLPTTK[562]	2	y	1	4	7.85	GAS3-N350VS	0	FALSE	0	0.99	FALSE	1
587	446.261	7.85	GAS3-N350VS		1	NVSLPTTK	NVSLPTTK[587]	2	y	1	4	7.85	GAS3-N350VS	0	FALSE	0	0.99	FALSE	1
612	446.261	7.85	GAS3-N350VS		1	NVSLPTTK	NVSLPTTK[612]	2	y	1	4	7.85	GAS3-N350VS	0	FALSE	0	0.99	FALSE	1
637	446.261	7.85	GAS3-N350VS		1	NVSLPTTK	NVSLPTTK[637]	2	y	1	4	7.85	GAS3-N350VS	0	FALSE	0	0.99	FALSE	1
662	446.261	7.85	GAS3-N350VS		1	NVSLPTTK	NVSLPTTK[662]	2	y	1	4	7.85	GAS3-N350VS	0	FALSE	0	0.99	FALSE	1
687	446.261	7.85	GAS3-N350VS		1	NVSLPTTK	NVSLPTTK[687]	2	y	1	4	7.85	GAS3-N350VS	0	FALSE	0	0.99	FALSE	1
712	446.261	7.85	GAS3-N350VS		1	NVSLPTTK	NVSLPTTK[712]	2	y	1	4	7.85	GAS3-N350VS	0	FALSE	0	0.99	FALSE	1
737	446.261	7.85	GAS3-N350VS		1	NVSLPTTK	NVSLPTTK[737]	2	y	1	4	7.85	GAS3-N350VS	0	FALSE	0	0.99	FALSE	1
762	446.261	7.85	GAS3-N350VS		1	NVSLPTTK	NVSLPTTK[762]	2	y	1	4	7.85	GAS3-N350VS	0	FALSE	0	0.99	FALSE	1
787	446.261	7.85	GAS3-N350VS		1	NVSLPTTK	NVSLPTTK[787]	2	y	1	4	7.85	GAS3-N350VS	0	FALSE	0	0.99	FALSE	1
812	446.261	7.85	GAS3-N350VS		1	NVSLPTTK	NVSLPTTK[812]	2	y	1	4	7.85	GAS3-N350VS	0	FALSE	0	0.99	FALSE	1
837	446.261	7.85	GAS3-N350VS		1	NVSLPTTK	NVSLPTTK[837]	2	y	1	4	7.85	GAS3-N350VS	0	FALSE	0	0.99	FALSE	1
862	446.261	7.85	GAS3-N350VS		1	NVSLPTTK	NVSLPTTK[862]	2	y	1	4	7.85	GAS3-N350VS	0	FALSE	0	0.99	FALSE	1
887	446.261	7.85	GAS3-N350VS		1	NVSLPTTK	NVSLPTTK[887]	2	y	1	4	7.85	GAS3-N350VS	0	FALSE	0	0.99	FALSE	1
912	446.261	7.85	GAS3-N350VS		1	NVSLPTTK	NVSLPTTK[912]	2	y	1	4	7.85	GAS3-N350VS	0	FALSE	0	0.99	FALSE	1
937	446.261	7.85	GAS3-N350VS		1	NVSLPTTK	NVSLPTTK[937]	2	y	1	4	7.85	GAS3-N350VS	0	FALSE	0	0.99	FALSE	1
962	446.261	7.85	GAS3-N350VS		1	NVSLPTTK	NVSLPTTK[962]	2	y	1	4	7.85	GAS3-N350VS	0	FALSE	0	0.99	FALSE	1
987	446.261	7.85	GAS3-N350VS		1	NVSLPTTK	NVSLPTTK[987]	2	y	1	4	7.85	GAS3-N350VS	0	FALSE	0	0.99	FALSE	1
1012	446.261	7.85	GAS3-N350VS		1	NVSLPTTK	NVSLPTTK[1012]	2	y	1	4	7.85	GAS3-N350VS	0	FALSE	0	0.99	FALSE	1
1037	446.261	7.85	GAS3-N350VS		1	NVSLPTTK	NVSLPTTK[1037]	2	y	1	4	7.85	GAS3-N350VS	0	FALSE	0	0.99	FALSE	1
1062	446.261	7.85	GAS3-N350VS		1	NVSLPTTK	NVSLPTTK[1062]	2	y	1	4	7.85	GAS3-N350VS	0	FALSE	0	0.99	FALSE	1
1087	446.261	7.85	GAS3-N350VS		1	NVSLPTTK	NVSLPTTK[1087]	2	y	1	4	7.85	GAS3-N350VS	0	FALSE	0	0.99	FALSE	1
1112	446.261	7.85	GAS3-N350VS		1	NVSLPTTK	NVSLPTTK[1112]	2	y	1	4	7.85	GAS3-N350VS	0	FALSE	0	0.99	FALSE	1
1137	446.261	7.85	GAS3-N350VS		1	NVSLPTTK	NVSLPTTK[1137]	2	y	1	4	7.85	GAS3-N350VS	0	FALSE	0	0.99	FALSE	1
1162	446.261	7.85	GAS3-N350VS		1	NVSLPTTK	NVSLPTTK[1162]	2	y	1	4	7.85	GAS3-N350VS	0	FALSE	0	0.99	FALSE	1
1187	446.261	7.85	GAS3-N350VS		1	NVSLPTTK	NVSLPTTK[1187]	2	y	1	4	7.85	GAS3-N350VS	0	FALSE	0	0.99	FALSE	1
1212	446.261	7.85	GAS3-N350VS		1	NVSLPTTK	NVSLPTTK[1212]	2	y	1	4	7.85	GAS3-N350VS	0	FALSE	0	0.99	FALSE	1
1237	446.261	7.85	GAS3-N350VS		1	NVSLPTTK	NVSLPTTK[1237]	2	y	1	4	7.85	GAS3-N350VS	0	FALSE	0	0.99	FALSE	1
412.5	223.634	7.85	GAS3-N350VS		1	NVSLPTTK	NVSLPTTK[412]	2	y	2	4	7.85	GAS3-N350VS	0	FALSE	0	0.99	FALSE	1
437	223.634	8.52	GAS3-N350VS		1	NVSLPTTK	NVSLPTTK[437]	2	y	2	4	8.52	GAS3-N350VS	0	FALSE	0	0.99	FALSE	1
462	223.634	7.85	GAS3-N350VS		1	NVSLPTTK	NVSLPTTK[462]	2	y	2	4	7.85	GAS3-N350VS	0	FALSE	0	0.99	FALSE	1
487	223.634	7.85	GAS3-N350VS		1	NVSLPTTK	NVSLPTTK[487]	2	y	2	4	7.85	GAS3-N350VS	0	FALSE	0	0.99	FALSE	1
512	223.634	7.85	GAS3-N350VS		1	NVSLPTTK	NVSLPTTK[512]	2	y	2	4	7.85	GAS3-N350VS	0	FALSE	0	0.99	FALSE	1
537	223.634	7.85	GAS3-N350VS		1	NVSLPTTK	NVSLPTTK[537]	2	y	2	4	7.85	GAS3-N350VS	0	FALSE	0	0.99	FALSE	1
562	223.634	7.85	GAS3-N350VS		1	NVSLPTTK	NVSLPTTK[562]	2	y	2	4	7.85	GAS3-N350VS	0	FALSE	0	0.99	FALSE	1
587	223.634	7.85	GAS3-N350VS		1	NVSLPTTK	NVSLPTTK[587]	2	y	2	4	7.85	GAS3-N350VS	0	FALSE	0	0.99	FALSE	1
612	223.634	7.85	GAS3-N350VS		1	NVSLPTTK	NVSLPTTK[612]	2	y	2	4	7.85	GAS3-N350VS	0	FALSE	0	0.99	FALSE	1
637	223.634	7.85	GAS3-N350VS		1	NVSLPTTK	NVSLPTTK[637]	2	y	2	4	7.85	GAS3-N350VS	0	FALSE	0	0.99	FALSE	1
662	223.634	7.85	GAS3-N350VS		1	NVSLPTTK	NVSLPTTK[662]	2	y	2	4	7.85	GAS3-N350VS	0	FALSE	0	0.99	FALSE	1
687	223.634	7.85	GAS3-N350VS		1	NVSLPTTK	NVSLPTTK[687]	2	y	2	4	7.85	GAS3-N350VS	0	FALSE	0	0.99	FALSE	1
712	223.634	7.85	GAS3-N350VS		1	NVSLPTTK	NVSLPTTK[712]	2	y	2	4	7.85	GAS3-N350VS	0	FALSE	0	0.99	FALSE	1
737	223.634	7.85	GAS3-N350VS		1	NVSLPTTK	NVSLPTTK[737]	2	y	2	4	7.85	GAS3-N350VS	0	FALSE	0	0.99	FALSE	1
762	223.634	7.85	GAS3-N350VS		1	NVSLPTTK	NVSLPTTK[762]	2	y	2	4	7.85	GAS3-N350VS	0	FALSE	0	0.99	FALSE	1
787	223.634	7.85	GAS3-N350VS		1	NVSLPTTK	NVSLPTTK[787]	2	y	2	4	7.85	GAS3-N350VS	0	FALSE	0	0.99	FALSE	1
812	223.634	7.85	GAS3-N350VS		1	NVSLPTTK	NVSLPTTK[812]	2	y	2	4	7.85	GAS3-N350VS	0	FALSE	0	0.99	FALSE	1
837	223.634	7.85	GAS3-N350VS		1	NVSLPTTK	NVSLPTTK[837]	2	y	2	4	7.85	GAS3-N350VS	0	FALSE	0	0.99	FALSE	1
862	223.634	7.85	GAS3-N350VS		1	NVSLPTTK	NVSLPTTK[862]	2	y	2	4	7.85	GAS3-N350VS	0	FALSE	0	0.99	FALSE	1
887	223.634	7.85	GAS3-N350VS		1	NVSLPTTK	NVSLPTTK[887]	2	y	2	4	7.85	GAS3-N350VS	0	FALSE	0	0.99	FALSE	1
912	223.634	7.85	GAS3-N350VS		1	NVSLPTTK	NVSLPTTK[912]	2	y	2	4	7.85	GAS3-N350VS	0	FALSE	0	0.99	FALSE	1
937	223.634	7.85	GAS3-N350VS		1	NVSLPTTK	NVSLPTTK[937]	2	y	2	4	7.85	GAS3-N350VS	0	FALSE	0	0.99	FALSE	1
962	223.634	7.85	GAS3-N350VS		1	NVSLPTTK	NVSLPTTK[962]	2	y	2	4	7.85	GAS3-N350VS	0	FALSE	0	0.99	FALSE	1
987	223.634	7.85	GAS3-N350VS		1	NVSLPTTK	NVSLPTTK[987]	2	y	2	4	7.85	GAS3-N350VS	0	FALSE	0	0.99	FALSE	1
1012	223.634	7.85	GAS3-N350VS		1	NVSLPTTK	NVSLPTTK[1012]	2	y	2	4	7.85	GAS3-N350VS	0	FALSE	0	0.99	FALSE	1
1037	223.634	7.85	GAS3-N350VS		1	NVSLPTTK	NVSLPTTK[1037]	2	y	2	4	7.85	GAS3-N350VS	0	FALSE	0	0.99	FALSE	1
1062	223.634	7.85	GAS3-N350VS		1	NVSLPTTK	NVSLPTTK[1062]	2	y	2	4	7.85	GAS3-N350VS	0	FALSE	0	0.99	FALSE	1
1087	223.634	7.85	GAS3-N350VS		1	NVSLPTTK	NVSLPTTK[1087]	2	y	2	4	7.85	GAS3-N350VS	0	FALSE	0	0.99	FALSE	1
1112	223.634	7.85	GAS3-N350VS		1	NVSLPTTK	NVSLPTTK[1112]	2	y	2	4	7.85	GAS3-N350VS	0	FALSE	0	0.99	FALSE	1
1137	223.634	7.85	GAS3-N350VS		1	NVSLPTTK	NVSLPTTK[1137]	2	y	2	4	7.85	GAS3-N350VS	0	FALSE	0	0.99	FALSE	1
1162	223.634	7.85	GAS3-N350VS		1	NVSLPTTK	NVSLPTTK[1162]	2	y	2	4	7.85	GAS3-N350VS	0	FALSE	0	0.99	FALSE	1
1187	223.634	7.85	GAS3-N350VS		1	NVSLPTTK	NVSLPTTK[1187]	2	y	2	4	7.85	GAS3-N350VS	0	FALSE	0	0.99	FALSE	1
1212	223.634	7.85	GAS3-N350VS		1	NVSLPTTK	NVSLPTTK[1212]	2	y	2	4	7.85	GAS3-N350VS	0	FALSE	0	0.99	FALSE	1
1237	223.634	7.85	GAS3-N350VS		1	NVSLPTTK	NVSLPTTK[1237]	2	y	2	4	7.85	GAS3-N350VS	0	FALSE	0	0.99	FALSE	1
412.5	559.345	7.85	GAS3-N350VS		1	NVSLPTTK	NVSLPTTK[412]	2	y	1	5	7.85	GAS3-N350VS	0	FALSE	0	0.99	FALSE	1
437	559.345	8.52	GAS3-N350VS		1	NVSLPTTK	NVSLPTTK[437]	2	y	1	5	8.52	GAS3-N350VS	0	FALSE	0	0.99	FALSE	1
462	559.345	7.85	GAS3-N350VS		1	NVSLPTTK	NVSLPTTK[462]	2	y	1	5	7.85	GAS3-N350VS	0	FALSE	0	0.99	FALSE	1
487	559.345	7.85	GAS3-N350VS		1	NVSLPTTK	NVSLPTTK[487]	2	y	1	5	7.85	GAS3-N350VS	0	FALSE	0	0.99	FALSE	1
512	559.345	7.85	GAS3-N350VS		1	NVSLPTTK	NVSLPTTK[512]	2	y	1	5	7.85	GAS3-N350VS	0	FALSE	0	0.99	FALSE	1
537	559.345	7.85	GAS3-N350VS		1	NVSLPTTK	NVSLPTTK[537]	2	y	1	5	7.85	GAS3-N350VS	0	FALSE	0	0.99	FALSE	1
562	559.345	7.85	GAS3-N350VS		1	NVSLPTTK	NVSLPTTK[562]	2	y	1	5	7.85	GAS3-N350VS	0	FALSE	0	0.99	FALSE	1
587	559.345	7.85	GAS3-N350VS		1	NVSLPTTK	NVSLPTTK[587]	2	y	1	5	7.85	GAS3-N350VS	0	FALSE	0	0.99	FALSE	1
612	559.345	7.85	GAS3-N350VS		1	NVSLPTTK	NVSLPTTK[612]	2	y	1	5	7.85	GAS3-N350VS	0	FALSE	0	0.99	FALSE	1
637	559.345	7.85	GAS3-N350VS		1	NVSLPTTK	NVSLPTTK[637]	2	y	1	5	7.85	GAS3-N350VS	0	FALSE	0	0.99	FALSE	1
662	559.345	7.85	GAS3-N350VS		1	NVSLPTTK	NVSLPTTK[662]	2	y	1	5	7.85	GAS3-N350VS	0	FALSE	0	0.99	FALSE	1
687	559.345	7.85	GAS3-N350VS		1	NVSLPTTK	NVSLPTTK[687]	2	y	1	5	7.85	GAS3-N350VS	0	FALSE	0	0.99	FALSE	1
712	559.345	7.85	GAS3-N350VS		1	NVSLPTTK	NVSLPTTK[712]	2	y	1	5	7.85	GAS3-N350VS	0	FALSE	0	0.99	FALSE	1
737	559.345	7.85	GAS3-N350VS		1	NVSLPTTK	NVSLPTTK[737]	2	y	1	5	7.85	GAS3-N350VS	0	FALSE	0	0.99	FALSE	1
762	559.345	7.85	GAS3-N350VS		1	NVSLPTTK	NVSLPTTK[762]	2	y	1	5	7.85	GAS3-N350VS	0	FALSE	0	0.99	FALSE	1
787	559.345	7.85	GAS3-N350VS		1	NVSLPTTK	NVSLPTTK[787]	2	y	1	5	7.85	GAS3-N350VS	0	FALSE	0	0.99	FALSE	1
812	559.345	7.85	GAS3-N350VS		1	NVSLPTTK	NVSLPTTK[812]	2	y	1	5	7.85	GAS3-N350VS	0	FALSE	0	0.99	FALSE	1
837	559.345	7.85	GAS3-N350VS		1	NVSLPTTK	NVSLPTTK[837]	2	y	1	5	7.85	GAS3-N350VS	0	FALSE	0	0.99	FALSE	1
862	559.345	7.85	GAS3-N350VS		1	NVSLPTTK	NVSLPTTK[862]	2	y	1	5	7.85	GAS3-N350VS	0	FALSE	0	0.99	FALSE	1
887	559.345	7.85	GAS3-N350VS		1	NVSLPTTK	NVSLPTTK[887]	2	y	1	5	7.85	GAS3-N350VS	0	FALSE	0	0.99	FALSE	1
912	559.345	7.85	GAS3-N350VS		1	NVSLPTTK	NVSLPTTK[912]	2	y	1	5	7.85	GAS3-N350VS	0	FALSE	0	0.99	FALSE	1
937	559.345	7.85	GAS3-N350VS		1	NVSLPTTK	NVSLPTTK[937]	2	y	1	5	7.85	GAS3-N350VS	0	FALSE	0	0.99	FALSE	1
962	559.345	7.85	GAS3-N350VS		1	NVSLPTTK	NVSLPTTK[962]	2	y	1	5	7.85	GAS3-N350VS	0	FALSE	0	0.99	FALSE	1
987	559.345	7.85	GAS3-N350VS		1	NVSLPTTK	NVSLPTTK[987]	2	y	1	5	7.85	GAS3-N350VS	0	FALSE	0	0.99	FALSE	1
1012	559.345	7.85	GAS3-N350VS		1	NVSLPTTK	NVSLPTTK[1012]	2	y	1	5	7.85	GAS3-N350VS	0	FALSE	0	0.99	FALSE	1
1037	559.345	7.85	GAS3-N350VS		1	NVSLPTTK	NVSLPTTK[1037]	2	y	1	5	7.85	GAS3-N350VS	0	FALSE	0	0.99	FALSE	1
1062	559.345	7.85	GAS3-N350VS		1	NVSLPTTK	NVSLPTTK[1062]	2	y	1	5	7.85	GAS3-N350VS	0	FALSE	0	0.99	FALSE	1
1087	559.345	7.85	GAS3-N350VS		1	NVSLPTTK	NVSLPTTK[1087]	2	y	1	5	7.85	GAS3-N350VS	0	FALSE	0	0.99	FALSE	1
1112	559.345	7.85	GAS3-N350VS		1	NVSLPTTK	NVSLPTTK[1112]	2	y	1	5	7.85	GAS3-N350VS	0	FALSE	0	0.99	FALSE	1
1137	559.345	7.85	GAS3-N350VS		1	NVSLPTTK	NVSLPTTK[1137]	2	y	1	5	7.85	GAS3-N350VS	0	FALSE	0	0.99	FALSE	1
1162	559.345	7.85	GAS3-N350VS		1	NVSLPTTK	NVSLPTTK[1162]	2	y	1	5	7.85	GAS3-N350VS	0	FALSE	0	0.99	FALSE	1
1187	559.345	7.85	GAS3-N350VS		1	NVSLPTTK	NVSLPTTK[1187]	2	y	1	5	7.85	GAS3-N350VS	0	FALSE	0	0.99	FALSE	1
1212	559.345	7.85	GAS3-N350VS		1	NVSLPTTK	NVSLPTTK[1212]	2	y	1	5	7.85	GAS3-N350VS	0	FALSE	0	0.99	FALSE	1
1237	559.345	7.85	GAS3-N350VS		1	NVSLPTTK	NVSLPTTK[1237]	2	y	1	5	7.85	GAS3-N350VS	0	FALSE	0	0.99	FALSE	1
412.5	280.176	7.85	GAS3-N350VS		1	NVSLPTTK	NVSLPTTK[412]	2	y	2	5	7.85	GAS3-N350VS	0	FALSE	0	0.99	FALSE	1
437	280.176	8.52	GAS3-N350VS		1	NVSLPTTK	NVSLPTTK[437]	2	y	2	5	8.52	GAS3-N350VS	0	FALSE	0	0.99	FALSE	1
462	280.176	7.85	GAS3-N350VS		1	NVSLPTTK	NVSLPTTK[462]	2	y	2	5	7.85	GAS3-N350VS	0	FALSE	0	0.99	FALSE	1
487	280.176	7.85	GAS3-N350VS		1	NVSLPTTK	NVSLPTTK[487]	2	y	2	5	7.85	GAS3-N350VS	0	FALSE	0	0.99	FALSE	1
512	280.176	7.85	GAS3-N350VS		1	NVSLPTTK	NVSLPTTK[512]	2	y	2	5	7.85	GAS3-N350VS	0	FALSE	0	0.99	FALSE	1
537	280.176	7.85	GAS3-N350VS		1	NVSLPTTK	NVSLPTTK[537]	2	y	2	5	7.85	GAS3-N350VS	0	FALSE	0	0.99	FALSE	1
562	280.176	7.85	GAS3-N350VS		1	NVSLPTTK	NVSLPTTK[562]	2	y	2	5	7.85	GAS3-N350VS	0	FALSE	0	0.99	FALSE	1
587	280.176	7.85	GAS3-N350VS		1	NVSLPTTK	NVSLPTTK[587]	2	y	2	5	7.85	GAS3-N350VS	0	FALSE	0	0.99	FALSE	1
612	280.176	7.85	GAS3-N350VS		1	NVSLPTTK	NVSLPTTK[612]	2	y	2	5	7.85	GAS3-N350VS	0	FALSE	0	0.99	FALSE	1
637	280.176	7.85	GAS3-N350VS		1	NVSLPTTK	NVSLPTTK[637]	2	y	2	5	7.85	GAS3-N350VS	0	FALSE	0	0.99	FALSE	1
662	280.176	7.85	GAS3-N350VS		1	NVSLPTTK	NVSLPTTK[662]	2	y	2	5	7.85	GAS3-N350VS	0	FALSE	0	0.99	FALSE	1
687	280.176	7.85	GAS3-N350VS		1	NVSLPTTK	NVSLPTTK[687]	2	y	2	5	7.85	GAS3-N350VS	0	FALSE	0	0.99	FALSE	1
712	280.176	7.85	GAS3-N350VS		1	NVSLPTTK	NVSLPTTK[712]	2	y	2	5	7.85	GAS3-N350VS	0	FALSE	0	0.99	FALSE	1
737	280.176	7.85	GAS3-N350VS		1	NVSLPTTK	NVSLPTTK[737]	2	y	2	5	7.85	GAS3-N350VS	0	FALSE	0	0.99	FALSE	1
762	280.176	7.85	GAS3-N350VS		1	NVSLPTTK	NVSLPTTK[762]	2	y	2	5	7.85	GAS3-N350VS	0	FALSE	0	0.99	FALSE	1
787	280.176	7.85	GAS3-N350VS		1	NVSLPTTK	NVSLPTTK[787]	2	y	2	5	7.85	GAS3-N350VS	0	FALSE	0	0.99	FALSE	1
812	280.176	7.85	GAS3-N350VS		1	NVSLPTTK	NVSLPTTK[812]	2	y	2	5	7.85	GAS3-N350VS	0	FALSE	0	0.99	FALSE	1
837	280.176	7.85	GAS3-N350VS		1	NVSLPTTK	NVSLPTTK[837]	2	y	2	5	7.85	GAS3-N350VS	0	FALSE	0	0.99	FALSE	1
862	280.176	7.85	GAS3-N350VS		1	NVSLPTTK	NVSLPTTK[862]	2	y	2	5	7.85	GAS3-N350VS	0	FALSE	0	0.99	FALSE	1
887	280.176	7.85	GAS3-N350VS		1	NVSLPTTK	NVSLPTTK[887]	2	y	2	5	7.85	GAS3-N350VS	0	FALSE	0	0.99	FALSE	1
912	280.176	7.85	GAS3-N350VS		1	NVSLPTTK	NVSLPTTK[912]	2	y	2	5	7.85	GAS3-N350VS	0	FALSE	0	0.99	FALSE	1
937	280.176	7.85	GAS3-N350VS		1	NVSLPTTK	NVSLPTTK[937]	2	y	2	5	7.85	GAS3-N350VS	0	FALSE	0	0.99	FALSE	1
962	280.176	7.85	GAS3-N350VS		1	NVSLPTTK	NVSLPTTK[962]	2	y	2	5	7.85	GAS3-N350VS	0	FALSE	0	0.99	FALSE	1
987	280.176	7.85	GAS3-N350VS		1	NVSLPTTK	NVSLPTTK[987]	2	y	2	5	7.85	GAS3-N350VS	0	FALSE	0	0.99	FALSE	1
1012	280.176	7.85	GAS3-N350VS		1	NVSLPTTK	NVSLPTTK[1012]	2	y	2	5	7.85	GAS3-N350VS	0	FALSE	0	0.99	FALSE	1
1037	280.176	7.85	GAS3-N350VS		1	NVSLPTTK	NVSLPTTK[1037]	2	y	2	5	7.85	GAS3-N350VS	0	FALSE	0	0.99	FALSE	1
1062	280.176	7.85	GAS3-N350VS		1	NVSLPTTK	NVSLPTTK[1062]	2	y	2	5	7.85	GAS3-N350VS	0	FALSE	0	0.99	FALSE	1
1087	280.176	7.85	GAS3-N350VS		1	NVSLPTTK	NVSLPTTK[1087]	2	y	2	5	7.85	GAS3-N350VS	0	FALSE	0	0.99	FALSE	1
1112	280.176	7.85	GAS3-N350VS		1	NVSLPTTK	NVSLPTTK[1112]	2	y	2	5	7.85	GAS3-N350VS	0	FALSE	0	0.99	FALSE	1
1137	280.176	7.85	GAS3-N350VS		1	NVSLPTTK	NVSLPTTK[1137]	2	y	2	5	7.85	GAS3-N350VS	0	FALSE	0	0.99	FALSE	1
1162	280.176	7.85	GAS3-N350VS		1	NVSLPTTK	NVSLPTTK[1162]	2	y	2	5	7.85	GAS3-N350VS	0	FALSE	0	0.99	FALSE	1
1187	280.176	7.85	GAS3-N350VS		1	NVSLPTTK	NVSLPTTK[1187]	2	y	2	5	7.85	GAS3-N350VS	0	FALSE	0	0.99	FALSE	1
1212	280.176	7.85	GAS3-N350VS		1	NVSLPTTK	NVSLPTTK[1212]	2	y	2	5	7.85	GAS3-N350VS	0	FALSE	0	0.99	FALSE	1
1237	280.176	7.85	GAS3-N350VS		1	NVSLPTTK	NVSLPTTK[1237]	2	y	2	5	7.85	GAS3-N350VS	0	FALSE	0	0.99	FALSE	1
412.5	646.377	7.85	GAS3-N350VS		1	NVSLPTTK	NVSLPTTK[412]	2	y	1	6	7.85	GAS3-N350VS	0	FALSE	0	0.99	FALSE	1
437	646.377	8.52	GAS3-N350VS		1	NVSLPTTK	NVSLPTTK[437]	2	y	1	6	8.52	GAS3-N350VS	0	FALSE	0	0.99	FALSE	1
462	646.377	7.85	GAS3-N350VS		1	NVSLPTTK	NVSLPTTK[462]	2	y	1	6	7.85	GAS3-N350VS	0	FALSE	0	0.99	FALSE	1
487	646.377	7.85	GAS3-N350VS		1	NVSLPTTK	NVSLPTTK[487]	2	y	1	6	7.85	GAS3-N350VS	0	FALSE	0	0.99	FALSE	1
512	646.377	7.85	GAS3-N350VS		1	NVSLPTTK	NVSLPTTK[512]	2	y	1	6	7.85	GAS3-N350VS	0	FALSE	0	0.99	FALSE	1
537	646.377	7.85	GAS3-N350VS		1	NVSLPTTK	NVSLPTTK[537]	2	y	1	6	7.85	GAS3-N350VS	0	FALSE	0	0.99	FALSE	1
562	646.377	7.85	GAS3-N350VS		1	NVSLPTTK	NVSLPTTK[562]	2	y	1	6	7.85	GAS3-N350VS	0	FALSE	0	0.99	FALSE	1
587	646.377	7.85	GAS3-N350VS		1	NVSLPTTK	NVSLPTTK[587]	2	y	1	6	7.85	GAS3-N350VS	0	FALSE	0	0.99	FALSE	1
612	646.377	7.85	GAS3-N350VS		1	NVSLPTTK	NVSLPTTK[612]	2	y	1	6	7.85	GAS3-N350VS	0	FALSE	0	0.99	FALSE	1
637	646.377	7.85	GAS3-N350VS		1	NVSLPTTK	NVSLPTTK[637]	2	y	1	6	7.85	GAS3-N350VS	0	FALSE	0	0.99	FALSE	1
662	646.377	7.85	GAS3-N350VS		1	NVSLPTTK	NVSLPTTK[662]	2	y	1	6	7.85	GAS3-N350VS	0	FALSE	0	0.99	FALSE	1
687	646.377	7.85	GAS3-N350VS		1	NVSLPTTK	NVSLPTTK[687]	2	y	1	6	7.85	GAS3-N350VS	0	FALSE	0	0.99	FALSE	1
712	646.377	7.85	GAS3-N350VS		1	NVSLPTTK	NVSLPTTK[712]	2	y	1	6	7.85	GAS3-N350VS	0	FALSE	0	0.99	FALSE	1
737	646.377	7.85	GAS3-N350VS		1	NVSLPTTK	NVSLPTTK[737]	2	y	1	6	7.85	GAS3-N350VS	0	FALSE	0	0.99	FALSE	1
762	646.377	7.85	GAS3-N350VS		1	NVSLPTTK	NVSLPTTK[762]	2	y	1	6	7.85	GAS3-N350VS	0	FALSE	0	0.99	FALSE	1
787	646.377	7.85	GAS3-N350VS		1	NVSLPTTK	NVSLPTTK[787]	2	y	1	6	7.85	GAS3-N350VS	0	FALSE	0	0.99	FALSE	1
812	646.377	7.85	GAS3-N350VS		1	NVSLPTTK	NVSLPTTK[812]	2	y	1	6	7.85	GAS3-N350VS	0	FALSE	0	0.99	FALSE	1
837	646.377	7.85	GAS3-N350VS		1	NVSLPTTK	NVSLPTTK[837]	2	y	1	6	7.85	GAS3-N350VS	0	FALSE	0	0.99	FALSE	1
862	646.377	7.85	GAS3-N350VS		1	NVSLPTTK	NVSLPTTK[862]	2	y	1	6	7.85	GAS3-N350VS	0	FALSE	0	0.99	FALSE	1
887	646.377	7.85	GAS3-N350VS		1	NVSLPTTK	NVSLPTTK[887]	2	y	1	6	7.85	GAS3-N350VS	0	FALSE	0	0.99	FALSE	1
912	646.377	7.85	GAS3-N350VS		1	NVSLPTTK	NVSLPTTK[912]	2	y	1	6	7.85	GAS3-N350VS	0	FALSE	0	0.99	FALSE	1
937	646.377	7.85	GAS3-N350VS		1	NVSLPTTK	NVSLPTTK[937]	2	y	1	6	7.85	GAS3-N350VS	0	FALSE	0	0.99	FALSE	1
962	646.377	7.85	GAS3-N350VS		1	NVSLPTTK	NVSLPTTK[962]	2	y	1	6	7.85	GAS3-N350VS	0	FALSE	0	0.99	FALSE	1
987	646.377	7.85	GAS3-N350VS		1	NVSLPTTK	NVSLPTTK[987]	2	y	1	6	7.85	GAS3-N350VS	0	FALSE	0	0.99	FALSE	1
1012	646.377	7.85	GAS3-N350VS		1	NVSLPTTK	NVSLPTTK[1012]	2	y	1	6	7.85	GAS3-N350VS	0	FALSE	0	0.99	FALSE	1
1037	646.377	7.85	GAS3-N350VS		1	NVSLPTTK	NVSLPTTK[1037]	2	y	1	6	7.85	GAS3-N350VS	0	FALSE	0	0.99	FALSE	1
1062	646.377	7.85	GAS3-N350VS		1	NVSLPTTK	NVSLPTTK[1062]	2	y	1	6	7.85	GAS3-N350VS	0	FALSE	0	0.99	FALSE	1
1087	646.377	7.85	GAS3-N350VS		1	NVSLPTTK	NVSLPTTK[1087]	2	y	1	6	7.85	GAS3-N350VS	0	FALSE	0	0.99	FALSE	1
1112	646.377	7.85	GAS3-N350VS		1	NVSLPTTK	NVSLPTTK[1112]	2	y	1	6	7.85	GAS3-N350VS	0	FALSE	0	0.99	FALSE	1
1137	646.377	7.85	GAS3-N350VS		1	NVSLPTTK	NVSLPTTK[1137]	2	y	1	6	7.85	GAS3-N350VS	0	FALSE	0	0.99	FALSE	1
1162	646.377	7.85	GAS3-N350VS		1	NVSLPTTK	NVSLPTTK[1162]	2	y	1	6	7.85	GAS3-N350VS	0	FALSE	0	0.99	FALSE	1
1187	646.377	7.85	GAS3-N350VS		1	NVSLPTTK	NVSLPTTK[1187]	2	y	1	6	7.85	GAS3-N350VS	0	FALSE	0	0.99	FALSE	1
1212	646.377	7.85	GAS3-N350VS		1	NVSLPTTK	NVSLPTTK[1212]	2	y	1	6	7.85	GAS3-N350VS	0	FALSE	0	0.99	FALSE	1
1237	646.377	7.85	GAS3-N350VS		1	NVSLPTTK	NVSLPTTK[1237]	2	y	1	6	7.85	GAS3-N350VS	0	FALSE	0	0.99	FALSE	1
412.5	323.692	7.85	GAS3-N350VS		1	NVSLPTTK	NVSLPTTK[412]	2	y	2	6	7.85	GAS3-N350VS	0	FALSE	0	0.99	FALSE	1
437	323.692	8.52	GAS3-N350VS		1	NVSLPTTK	NVSLPTTK[437]	2	y	2	6	8.52	GAS3-N350VS	0	FALSE	0	0.99	FALSE	1
462	323.692	7.85	GAS3-N350VS		1	NVSLPTTK	NVSLPTTK[462]	2	y	2	6	7.85	GAS3-N350VS	0	FALSE	0	0.99	FALSE	1
487	323.692	7.85	GAS3-N350VS		1	NVSLPTTK	NVSLPTTK[487]	2	y	2	6	7.85	GAS3-N350VS	0	FALSE	0	0.99	FALSE	1
512	323.692	7.85	GAS3-N350VS		1	NVSLPTTK	NVSLPTTK[512]	2	y	2	6	7.85	GAS3-N350VS	0	FALSE	0	0.99	FALSE	1
537	323.692	7.85	GAS3-N350VS		1	NVSLPTTK	NVSLPTTK[537]	2	y	2	6	7.85	GAS3-N350VS	0	FALSE	0	0.99	FALSE	1
562	323.692	7.85	GAS3-N350VS		1	NVSLPTTK	NVSLPTTK[562]	2	y	2	6	7.85	GAS3-N350VS	0	FALSE	0	0.99	FALSE	1
587	323.692	7.85	GAS3-N350VS		1	NVSLPTTK	NVSLPTTK[587]	2	y	2	6	7.85	GAS3-N350VS	0	FALSE	0	0.99	FALSE	1
612	323.692	7.85	GAS3-N350VS		1	NVSLPTTK	NVSLPTTK[612]	2	y	2	6	7.85	GAS3-N350VS	0	FALSE	0	0.99	FALSE	1
637	323.692	7.85	GAS3-N350VS		1	NVSLPTTK	NVSLPTTK[637]	2	y	2	6	7.85	GAS3-N350VS	0	FALSE	0	0.99	FALSE	1
662	323.692	7.85	GAS3-N350VS		1	NVSLPTTK	NVSLPTTK[662]	2	y	2	6	7.85	GAS3-N350VS	0	FALSE	0	0.99	FALSE	1
687	323.692	7.85	GAS3-N350VS		1	NVSLPTTK	NVSLPTTK[687]	2	y	2	6	7.85	GAS3-N350VS	0	FALSE	0	0.99	FALSE	1
712	323.692	7.85	GAS3-N350VS		1	NVSLPTTK	NVSLPTTK[712]	2	y	2	6	7.85	GAS3-N350VS	0	FALSE	0	0.99	FALSE	1
737	323.692	7.85	GAS3-N350VS		1	NVSLPTTK	NVSLPTTK[737]	2	y	2	6	7.85	GAS3-N350VS	0	FALSE	0	0.99	FALSE	1
762	323.692	7.85	GAS3-N350VS		1	NVSLPTTK	NVSLPTTK[762]	2	y	2	6	7.85	GAS3-N350VS	0	FALSE	0	0.99	FALSE	1
787	323.692	7.85	GAS3-N350VS		1	NVSLPTTK	NVSLPTTK[787]	2	y	2	6	7.85	GAS3-N350VS	0	FALSE	0	0.99	FALSE	1
812	323.692	7.85	GAS3-N350VS		1	NVSLPTTK	NVSLPTTK[812]	2	y	2	6	7.85	GAS3-N350VS	0	FALSE	0	0.99	FALSE	1
837	323.692	7.85	GAS3-N350VS		1	NVSLPTTK	NVSLPTTK[837]	2	y	2	6	7.85	GAS3-N350VS	0	FALSE	0	0.99	FALSE	1
862	323.692	7.85	GAS3-N350VS		1	NVSLPTTK	NVSLPTTK[862]	2	y	2	6	7.85	GAS3-N350VS	0	FALSE	0	0.99	FALSE	1
887	323.692	7.85	GAS3-N350VS		1	NVSLPTTK	NVSLPTTK[887]	2	y	2	6	7.85	GAS3-N350VS	0	FALSE	0	0.99	FALSE	1
912	323.692	7.85	GAS3-N350VS		1	NVSLPTTK	NVSLPTTK[912]	2	y	2	6	7.85	GAS3-N350VS	0	FALSE	0	0.99	FALSE	1
937	323.692	7.85	GAS3-N350VS		1	NVSLPTTK	NVSLPTTK[937]	2	y	2	6	7.85	GAS3-N350VS	0	FALSE	0	0.99	FALSE	1
962	323.692	7.85	GAS3-N350VS		1	NVSLPTTK	NVSLPTTK[962]	2	y	2	6	7.85	GAS3-N350VS	0	FALSE	0	0.99	FALSE	1
987	323.692	7.85	GAS3-N350VS		1	NVSLPTTK	NVSLPTTK[987]	2	y	2	6	7.85	GAS3-N350VS	0	FALSE	0	0.99	FALSE	1
1012	323.692	7.85	GAS3-N350VS		1	NVSLPTTK	NVSLPTTK[1012]	2	y	2	6	7.85	GAS3-N350VS	0	FALSE	0	0.99	FALSE	1
1037	323.692	7.85	GAS3-N350VS		1	NVSLPTTK	NVSLPTTK[1037]	2	y	2	6	7.85	GAS3-N350VS	0	FALSE	0	0.99	FALSE	1
1062	323.692	7.85	GAS3-N350VS		1	NVSLPTTK	NVSLPTTK[1062]	2	y	2	6	7.85	GAS3-N350VS	0	FALSE	0	0.99	FALSE	1
1087	323.692	7.85	GAS3-N350VS		1	NVSLPTTK	NVSLPTTK[1087]	2	y	2	6	7.85	GAS3-N350VS	0	FALSE	0	0.99	FALSE	1
1112	323.692	7.85	GAS3-N350VS		1	NVSLPTTK	NVSLPTTK[1112]	2	y	2	6	7.85	GAS3-N350VS	0	FALSE	0	0.99	FALSE	1
1137	323.692	7.85	GAS3-N350VS		1	NVSLPTTK	NVSLPTTK[1137]	2	y	2	6	7.85	GAS3-N350VS	0	FALSE	0	0.99	FALSE	1
1162	323.692	7.85	GAS3-N350VS		1	NVSLPTTK	NVSLPTTK[1162]	2	y	2	6	7.85	GAS3-N350VS	0	FALSE	0	0.99	FALSE	1
1187	323.692	7.85	GAS3-N350VS		1	NVSLPTTK	NVSLPTTK[1187]	2	y	2	6	7.85	GAS3-N350VS	0	FALSE	0	0.99	FALSE	1
1212	323.692	7.85	GAS3-N350VS		1	NVSLPTTK	NVSLPTTK[1212]	2	y	2	6	7.85	GAS3-N350VS	0	FALSE	0	0.99	FALSE	1
1237	323.692	7.85	GAS3-N350VS		1	NVSLPTTK	NVSLPTTK[1237]	2	y	2	6	7.85	GAS3-N350VS	0	FALSE	0	0.99	FALSE	1
412.5	745.445	7.85	GAS3-N350VS		1	NVSLPTTK	NVSLPTTK[412]	2	y	1	7	7.85	GAS3-N350VS	0	FALSE	0	0.99	FALSE	1
437	745.445	8.52	GAS3-N350VS		1	NVSLPTTK	NVSLPTTK[437]	2	y	1	7	8.52	GAS3-N350VS	0	FALSE	0	0.99	FALSE	1
462	745.445	7.85	GAS3-N350VS		1	NVSLPTTK	NVSLPTTK[462]	2	y	1	7	7.85	GAS3-N350VS	0	FALSE	0	0.99	FALSE	1
487	745.445	7.85	GAS3-N350VS		1	NVSLPTTK	NVSLPTTK[487]	2	y	1	7	7.85	GAS3-N350VS	0	FALSE	0	0.99	FALSE	1
512	745.445	7.85	GAS3-N350VS		1	NVSLPTTK	NVSLPTTK[512]	2	y	1	7	7.85	GAS3-N350VS	0	FALSE	0	0.99	FALSE	1
537	745.445	7.85	GAS3-N350VS		1	NVSLPTTK	NVSLPTTK[537]	2	y	1	7	7.85	GAS3-N350VS	0	FALSE	0	0.99	FALSE	1
562	745.445	7.85	GAS3-N350VS		1	NVSLPTTK	NVSLPTTK[562]	2	y	1	7	7.85	GAS3-N350VS	0	FALSE	0	0.99	FALSE	1
587	745.445	7.85	GAS3-N350VS		1	NVSLPTTK	NVSLPTTK[587]	2	y	1	7	7.85	GAS3-N350VS	0	FALSE	0	0.99	FALSE	1
612	745.445	7.85	GAS3-N350VS		1	NVSLPTTK	NVSLPTTK[612]	2	y	1	7	7.85	GAS3-N350VS	0	FALSE	0	0.99	FALSE	1
637	745.445	7.85	GAS3-N350VS		1	NVSLPTTK	NVSLPTTK[637]	2	y	1	7	7.85	GAS3-N350VS	0	FALSE	0	0.99	FALSE	1
662	745.445	7.85	GAS3-N350VS		1	NVSLPTTK	NVSLPTTK[662]	2	y	1	7	7.85	GAS3-N350VS	0	FALSE	0	0.99	FALSE	1
687	745.445	7.85	GAS3-N350VS		1	NVSLPTTK	NVSLPTTK[687]	2	y	1	7	7.85	GAS3-N350VS	0	FALSE	0	0.99	FALSE	1
712	745.445	7.85	GAS3-N350VS		1	NVSLPTTK	NVSLPTTK[712]	2	y	1	7	7.85	GAS3-N350VS	0	FALSE	0	0.99	FALSE	1
737	745.445	7.85	GAS3-N350VS		1	NVSLPTTK	NVSLPTTK[737]	2	y	1	7	7.85	GAS3-N350VS	0	FALSE	0	0.99	FALSE	1
762	745.445	7.85	GAS3-N350VS		1	NVSLPTTK	NVSLPTTK[762]	2	y	1	7	7.85	GAS3-N350VS	0	FALSE	0	0.99	FALSE	1
787	745.445	7.85	GAS3-N350VS		1	NVSLPTTK	NVSLPTTK[787]	2	y	1	7	7.85	GAS3-N350VS	0	FALSE	0	0.99	FALSE	1
812	745.445	7.85	GAS3-N350VS		1	NVSLPTTK	NVSLPTTK[812]	2	y	1	7	7.85	GAS3-N350VS	0	FALSE	0	0.99	FALSE	1
837	745.445	7.85	GAS3-N350VS		1	NVSLPTTK	NVSLPTTK[837]	2	y	1	7	7.85	GAS3-N350VS	0	FALSE	0	0.99	FALSE	1
862	745.445	7.85	GAS3-N350VS		1	NVSLPTTK	NVSLPTTK[862]	2	y	1	7	7.85	GAS3-N350VS	0	FALSE	0	0.99	FALSE	1
887	745.445	7.85	GAS3-N350VS		1	NVSLPTTK	NVSLPTTK[887]	2	y	1	7	7.85	GAS3-N350VS	0	FALSE	0	0.99	FALSE	1
912	745.445	7.85	GAS3-N350VS		1	NVSLPTTK	NVSLPTTK[912]	2	y	1	7	7.85	GAS3-N350VS	0	FALSE	0	0.99	FALSE	1
937	745.445	7.85	GAS3-N350VS		1	NVSLPTTK	NVSLPTTK[937]	2	y	1	7	7.85	GAS3-N350VS	0	FALSE	0	0.99	FALSE	1
962	745.445	7.85	GAS3-N350VS		1	NVSLPTTK	NVSLPTTK[962]	2	y	1	7	7.85	GAS3-N350VS	0	FALSE	0	0.99	FALSE	1
987	745.445	7.85	GAS3-N350VS		1	NVSLPTTK	NVSLPTTK[987]	2	y	1	7	7.85	GAS3-N350VS	0	FALSE	0	0.99	FALSE	1
1012	745.445	7.85	GAS3-N350VS		1	NVSLPTTK	NVSLPTTK[1012]	2	y	1	7	7.85	GAS3-N350VS	0	FALSE	0	0.99	FALSE	1
1037	745.445	7.85	GAS3-N350VS		1	NVSLPTTK	NVSLPTTK[1037]	2	y	1	7	7.85	GAS3-N350VS	0	FALSE	0	0.99	FALSE	1
1062	745.445	7.85	GAS3-N350VS		1	NVSLPTTK	NVSLPTTK[1062]	2	y	1	7	7.85	GAS3-N350VS	0	FALSE	0	0.99	FALSE	1
1087	745.445	7.85	GAS3-N350VS		1	NVSLPTTK	NVSLPTTK[1087]	2	y	1	7	7.85	GAS3-N350VS	0	FALSE	0	0.99	FALSE	1
1112	745.445	7.85	GAS3-N350VS		1	NVSLPTTK	NVSLPTTK[1112]	2	y	1	7	7.85	GAS3-N350VS	0	FALSE	0	0.99	FALSE	1
1137	745.445	7.85	GAS3-N350VS		1	NVSLPTTK	NVSLPTTK[1137]	2	y	1	7	7.85	GAS3-N350VS	0	FALSE	0	0.99	FALSE	1
1162	745.445	7.85	GAS3-N350VS		1	NVSLPTTK	NVSLPTTK[1162]	2	y	1	7	7.85	GAS3-N350VS	0	FALSE	0	0.99	FALSE	1
1187	745.445	7.85	GAS3-N350VS		1	NVSLPTTK	NVSLPTTK[1187]	2	y	1	7	7.85	GAS3-N350VS	0	FALSE	0	0.99	FALSE	1
1212	745.445	7.85	GAS3-N350VS		1	NVSLPTTK	NVSLPTTK[1212]	2	y	1	7	7.85	GAS3-N350VS	0	FALSE	0	0.99	FALSE	1
1237	745.445	7.85	GAS3-N350VS		1	NVSLPTTK	NVSLPTTK[1237]	2	y	1	7	7.85	GAS3-N350VS	0	FALSE	0	0.99	FALSE	1
412.5	373.226	7.85	GAS3-N350VS		1	NVSLPTTK	NVSLPTTK[412]	2	y	2	7	7.85	GAS3-N350VS	0	FALSE	0	0.99	FALSE	1
437	373.226	8.52	GAS3-N350VS		1	NVSLPTTK	NVSLPTTK[437]	2	y	2	7	8.52	GAS3-N350VS	0	FALSE	0	0.99	FALSE	1
462	373.226	7.85	GAS3-N350VS		1	NVSLPTTK	NVSLPTTK[462]	2	y	2	7	7.85	GAS3-N350VS	0	FALSE	0	0.99	FALSE	1
487	373.226	7.85	GAS3-N350VS		1	NVSLPTTK	NVSLPTTK[487]	2	y	2	7	7.85	GAS3-N350VS	0	FALSE	0	0.99	FALSE	1
512	373.226	7.85	GAS3-N350VS		1	NVSLPTTK	NVSLPTTK[512]	2	y	2	7	7.85	GAS3-N350VS	0	FALSE	0	0.99	FALSE	1
537	373.226	7.85	GAS3-N350VS		1	NVSLPTTK	NVSLPTTK[537]	2	y	2	7	7.85	GAS3-N350VS	0	FALSE	0	0.99	FALSE	1
562	373.226	7.85	GAS3-N350VS		1	NVSLPTTK	NVSLPTTK[562]	2	y	2	7	7.85	GAS3-N350VS	0	FALSE	0	0.99	FALSE	1
587	373.226	7.85	GAS3-N350VS		1	NVSLPTTK	NVSLPTTK[587]	2	y	2	7	7.85	GAS3-N350VS	0	FALSE	0	0.99	FALSE	1
612	373.226	7.85	GAS3-N350VS		1	NVSLPTTK	NVSLPTTK[612]	2	y	2	7	7.85	GAS3-N350VS	0	FALSE	0	0.99	FALSE	1
637	373.226	7.85	GAS3-N350VS		1	NVSLPTTK	NVSLPTTK[637]	2	y	2	7	7.85	GAS3-N350VS	0	FALSE	0	0.99	FALSE	1
662	373.226	7.85	GAS3-N350VS		1	NVSLPTTK	NVSLPTTK[662]	2	y	2	7	7.85	GAS3-N350VS	0	FALSE	0	0.99	FALSE	1
687	373.226	7.85	GAS3-N350VS		1	NVSLPTTK	NVSLPTTK[687]	2	y	2	7	7.85	GAS3-N350VS	0	FALSE	0	0.99	FALSE	1
712	373.226	7.85	GAS3-N350VS		1	NVSLPTTK	NVSLPTTK[712]	2	y	2	7	7.85	GAS3-N350VS	0	FALSE	0	0.99	FALSE	1
737	373.226	7.85	GAS3-N350VS		1	NVSLPTTK	NVSLPTTK[737]	2	y	2	7	7.85	GAS3-N350VS	0	FALSE	0	0.99	FALSE	1
762	373.226	7.85	GAS3-N350VS		1	NVSLPTTK	NVSLPTTK[762]	2	y	2	7	7.85	GAS3-N350VS	0	FALSE	0	0.99	FALSE	1
787	373.226	7.85	GAS3-N350VS		1	NVSLPTTK	NVSLPTTK[787]	2	y	2	7	7.85	GAS3-N350VS	0	FALSE	0	0.99	FALSE	1
812	373.226	7.85	GAS3-N350VS		1	NVSLPTTK	NVSLPTTK[812]	2	y	2	7	7.85	GAS3-N350VS	0	FALSE	0	0.99	FALSE	1
837	373.226	7.85	GAS3-N350VS		1	NVSLPTTK	NVSLPTTK[837]	2	y	2	7	7.85	GAS3-N350VS	0	FALSE	0	0.99	FALSE	1
862	373.226	7.85	GAS3-N350VS		1	NVSLPTTK	NVSLPTTK[862]	2	y	2	7	7.85	GAS3-N350VS	0	FALSE	0	0.99	FALSE	1
887	373.226	7.85	GAS3-N350VS		1	NVSLPTTK	NVSLPTTK[887]	2	y	2	7	7.85	GAS3-N350VS	0	FALSE	0	0.99	FALSE	1
912	373.226	7.85	GAS3-N350VS		1	NVSLPTTK	NVSLPTTK[912]	2	y	2	7	7.85	GAS3-N350VS	0	FALSE	0	0.99	FALSE	1
937	373.226	7.85	GAS3-N350VS		1	NVSLPTTK	NVSLPTTK[937]	2	y	2	7	7.85	GAS3-N350VS	0	FALSE	0	0.99	FALSE	1
962	373.226	7.85	GAS3-N350VS		1	NVSLPTTK	NVSLPTTK[962]	2	y	2	7	7.85	GAS3-N350VS	0	FALSE	0	0.99	FALSE	1
987	373.226	7.85	GAS3-N350VS		1	NVSLPTTK	NVSLPTTK[987]	2	y	2	7	7.85	GAS3-N350VS	0	FALSE	0	0.99	FALSE	1
1012	373.226	7.85	GAS3-N350VS		1	NVSLPTTK	NVSLPTTK[1012]	2	y	2	7	7.85	GAS3-N350VS	0	FALSE	0	0.99	FALSE	1
1037	373.226	7.85	GAS3-N350VS		1	NVSLPTTK	NVSLPTTK[1037]	2	y	2	7	7.85	GAS3-N350VS	0	FALSE	0	0.99	FALSE	1
1062	373.226	7.85	GAS3-N350VS		1	NVSLPTTK	NVSLPTTK[1062]	2	y	2	7	7.85	GAS3-N350VS	0	FALSE	0	0.99	FALSE	1
1087	373.226	7.85	GAS3-N350VS		1	NVSLPTTK	NVSLPTTK[1087]	2	y	2	7	7.85	GAS3-N350VS	0	FALSE	0	0.99	FALSE	1
1112	373.226	7.85	GAS3-N350VS		1	NVSLPTTK	NVSLPTTK[1112]	2	y	2	7	7.85	GAS3-N350VS	0	FALSE	0	0.99	FALSE	1
1137	373.226	7.85	GAS3-N350VS		1	NVSLPTTK	NVSLPTTK[1137]	2	y	2	7	7.85	GAS3-N350VS	0	FALSE	0	0.99	FALSE	1
1162	373.226	7.85	GAS3-N350VS		1	NVSLPTTK	NVSLPTTK[1162]	2	y	2	7	7.85	GAS3-N350VS	0	FALSE	0	0.99	FALSE	1
1187	373.226	7.85	GAS3-N350VS		1	NVSLPTTK	NVSLPTTK[1187]	2	y	2	7	7.85	GAS3-N350VS	0	FALSE	0	0.99	FALSE	1
1212	373.226	7.85	GAS3-N350VS		1	NVSLPTTK	NVSLPTTK[1212]	2	y	2	7	7.85	GAS3-N350VS	0	FALSE	0	0.99	FALSE	1
1237	373.226	7.85	GAS3-N350VS		1	NVSLPTTK	NVSLPTTK[1237]	2	y	2	7	7.85	GAS3-N350VS	0	FALSE	0	0.99	FALSE	1
412.5	285.135	11.3	CRH1-N177YT		1	FHNYTLDWAMDK	FHNYTLDWAMDK[412]	2	b	1	2	11.3	CRH1-N177YT	0	FALSE	0	0.99	FALSE	1
437	285.135	11.3	CRH1-N177YT		1	FHNYTLDWAMDK	FHNYTLDWAMDK[437]	2	b	1	2	11.3	CRH1-N177YT	0	FALSE	0	0.99	FALSE	1
462	285.135	11.3	CRH1-N177YT		1	FHNYTLDWAMDK	FHNYTLDWAMDK[462]	2	b	1	2	11.3	CRH1-N177YT	0	FALSE	0	0.99	FALSE	1
487	285.135	11.3	CRH1-N177YT		1	FHNYTLDWAMDK	FHNYTLDWAMDK[487]	2	b	1	2	11.3	CRH1-N177YT	0	FALSE	0	0.99	FALSE	1
512	285.135	12.3	CRH1-N177YT		1	FHNYTLDWAMDK	FHNYTLDWAMDK[512]	2	b	1	2	12.3	CRH1-N177YT	0	FALSE	0	0.99	FALSE	1
537	285.135	11.3	CRH1-N177YT		1	FHNYTLDWAMDK	FHNYTLDWAMDK[537]	2	b	1	2	12.3	CRH1-N177YT	0	FALSE	0	0.99	FALSE	1
562	285.135	11.3	CRH1-N177YT		1	FHNYTLDWAMDK	FHNYTLDWAMDK[562]	2	b	1	2	12.3	CRH1-N177YT	0	FALSE	0	0.99	FALSE	1
587	285.135	11.3	CRH1-N177YT		1	FHNYTLDWAMDK	FHNYTLDWAMDK[587]	2	b	1	2	12.3	CRH1-N177YT	0	FALSE	0	0.99	FALSE	1
612	285.135	11.3	CRH1-N177YT		1	FHNYTLDWAMDK	FHNYTLDWAMDK[612]	2	b	1	2	12.3	CRH1-N177YT	0	FALSE	0	0.99	FALSE	1
637	285.135	11.3	CRH1-N177YT		1	FHNYTLDWAMDK	FHNYTLDWAMDK[637]	2	b	1	2	12.3	CRH1-N177YT	0	FALSE	0	0.99	FALSE	1
662	285.135	11.3	CRH1-N177YT		1	FHNYTLDWAMDK	FHNYTLDWAMDK[662]	2	b	1	2	12.3	CRH1-N177YT	0	FALSE	0	0.99	FALSE	1
687	285.135	11.3	CRH1-N177YT		1	FHNYTLDWAMDK	FHNYTLDWAMDK[687]	2	b	1	2	12.3	CRH1-N177YT	0	FALSE	0	0.99	FALSE	1
712	285.135	11.3	CRH1-N177YT		1	FHNYTLDWAMDK	FHNYTLDWAMDK[712]	2	b	1	2	12.3	CRH1-N177YT	0	FALSE	0	0.99	FALSE	1
737	285.135	11.3	CRH1-N177YT		1	FHNYTLDWAMDK	FHNYTLDWAMDK[737]	2	b	1	2	12.3	CRH1-N177YT	0	FALSE	0	0.99	FALSE	1
762	285.135	11.3	CRH1-N177YT		1	FHNYTLDWAMDK	FHNYTLDWAMDK[762]	2	b	1	2	12.3	CRH1-N177YT	0	FALSE	0	0.99	FALSE	1
787	285.135	11.3	CRH1-N177YT		1	FHNYTLDWAMDK	FHNYTLDWAMDK[787]	2	b	1	2	12.3	CRH1-N177YT	0	FALSE	0	0.99	FALSE	1
812	285.135	11.3	CRH1-N177YT		1	FHNYTLDWAMDK	FHNYTLDWAMDK[812]	2	b	1	2	12.3	CRH1-N177YT	0	FALSE	0	0.99	FALSE	1
837	285.135	11.3	CRH1-N177YT		1	FHNYTLDWAMDK	FHNYTLDWAMDK[837]	2	b	1	2	12.3	CRH1-N177YT	0	FALSE	0	0.99	FALSE	1
862	285.135	11.3	CRH1-N177YT		1	FHNYTLDWAMDK	FHNYTLDWAMDK[862]	2	b	1	2	12.3	CRH1-N177YT	0	FALSE	0	0.99	FALSE	1
887	285.135	11.3	CRH1-N177YT		1	FHNYTLDWAMDK	FHNYTLDWAMDK[887]	2	b	1	2	12.3	CRH1-N177YT	0	FALSE	0	0.99	FALSE	1
912	285.135	11.3	CRH1-N177YT		1	FHNYTLDWAMDK	FHNYTLDWAMDK[912]	2	b	1	2	12.3	CRH1-N177YT	0	FALSE	0	0.99	FALSE	1
937	285.135	11.3	CRH1-N177YT		1	FHNYTLDWAMDK	FHNYTLDWAMDK[937]	2	b	1	2	12.3	CRH1-N177YT	0	FALSE	0	0.99	FALSE	1
962	285.135	11.3	CRH1-N177YT		1	FHNYTLDWAMDK	FHNYTLDWAMDK[962]	2	b	1	2	11.3	CRH1-N177YT	0	FALSE	0	0.99	FALSE	1
987	285.135	11.3	CRH1-N177YT		1	FHNYTLDWAMDK	FHNYTLDWAMDK[987]	2	b	1	2	11.3	CRH1-N177YT	0	FALSE	0	0.99	FALSE	1
1012	285.135	11.3	CRH1-N177YT		1	FHNYTLDWAMDK	FHNYTLDWAMDK[1012]	2	b	1	2	11.3	CRH1-N177YT	0	FALSE	0	0.99	FALSE	1
1037	285.135	11.3	CRH1-N177YT		1	FHNYTLDWAMDK	FHNYTLDWAMDK[1037]	2	b	1	2	11.3	CRH1-N177YT	0	FALSE	0	0.99	FALSE	1
1062	285.135	11.3	CRH1-N177YT		1	FHNYTLDWAMDK	FHNYTLDWAMDK[1062]	2	b	1	2	11.3	CRH1-N177YT	0	FALSE	0	0.99	FALSE	1
1087	285.135	11.3	CRH1-N177YT		1	FHNYTLDWAMDK	FHNYTLDWAMDK[1087]	2	b	1	2	11.3	CRH1-N177YT	0	FALSE	0	0.99	FALSE	1
1112	285.135	11.3	CRH1-N177YT		1	FHNYTLDWAMDK	FHNYTLDWAMDK[1112]	2	b	1	2	11.3	CRH1-N177YT	0	FALSE	0	0.99	FALSE	1
1137	285.135	11.3	CRH1-N177YT		1	FHNYTLDWAMDK	FHNYTLDWAMDK[1137]	2	b	1	2	11.3	CRH1-N177YT	0	FALSE	0	0.99	FALSE	1
1162	285.135	11.3	CRH1-N177YT		1	FHNYTLDWAMDK	FHNYTLDWAMDK[1162]	2	b	1	2	11.3	CRH1-N177YT	0	FALSE	0	0.99	FALSE	1
1187	285.135	11.3	CRH1-N177YT		1	FHNYTLDWAMDK	FHNYTLDWAMDK[1187]	2	b	1	2	11.3	CRH1-N177YT	0	FALSE	0	0.99	FALSE	1
1212	285.135	11.3	CRH1-N177YT		1	FHNYTLDWAMDK	FHNYTLDWAMDK[1212]	2	b	1	2	11.3	CRH1-N177YT	0	FALSE	0	0.99	FALSE	1
1237	285.135	11.3	CRH1-N177YT		1	FHNYTLDWAMDK	FHNYTLDWAMDK[1237]	2	b	1	2	11.3	CRH1-N177YT	0	FALSE	0	0.99	FALSE	1
412.5	262.14	11.3	CRH1-N177YT		1	FHNYTLDWAMDK	FHNYTLDWAMDK[412]	2	y	1	2	11.3	CRH1-N177YT	0	FALSE	0	0.99	FALSE	1
437	262.14	11.3	CRH1-N177YT		1	FHNYTLDWAMDK	FHNYTLDWAMDK[437]	2	y	1	2	11.3	CRH1-N177YT	0	FALSE	0	0.99	FALSE	1
462	262.14	11.3	CRH1-N177YT		1	FHNYTLDWAMDK	FHNYTLDWAMDK[462]	2	y	1	2	11.3	CRH1-N177YT	0	FALSE	0	0.99	FALSE	1
487	262.14	11.3	CRH1-N177YT		1	FHNYTLDWAMDK	FHNYTLDWAMDK[487]	2	y	1	2	11.3	CRH1-N177YT	0	FALSE	0	0.99	FALSE	1
512	262.14	12.3	CRH1-N177YT		1	FHNYTLDWAMDK	FHNYTLDWAMDK[512]	2	y	1	2	12.3	CRH1-N177YT	0	FALSE	0	0.99	FALSE	1
537	262.14	11.3	CRH1-N177YT		1	FHNYTLDWAMDK	FHNYTLDWAMDK[537]	2	y	1	2	11.3	CRH1-N177YT	0	FALSE	0	0.99	FALSE	1
562	262.14	11.3	CRH1-N177YT		1	FHNYTLDWAMDK	FHNYTLDWAMDK[562]	2	y	1	2	11.3	CRH1-N177YT	0	FALSE	0	0.99	FALSE	1
587	262.14	11.3	CRH1-N177YT		1	FHNYTLDWAMDK	FHNYTLDWAMDK[587]	2	y	1	2	11.3	CRH1-N177YT	0	FALSE	0	0.99	FALSE	1
612	262.14	11.3	CRH1-N177YT		1	FHNYTLDWAMDK	FHNYTLDWAMDK[612]	2	y	1	2	11.3	CRH1-N177YT	0	FALSE	0	0.99	FALSE	1
637	262.14	11.3	CRH1-N177YT		1	FHNYTLDWAMDK	FHNYTLDWAMDK[637]	2	y	1	2	11.3	CRH1-N177YT	0	FALSE	0	0.99	FALSE	1
662	262.14	11.3	CRH1-N177YT		1	FHNYTLDWAMDK	FHNYTLDWAMDK[662]	2	y	1	2	11.3	CRH1-N177YT	0	FALSE	0	0.99	FALSE	1
687	262.14	11.3	CRH1-N177YT		1	FHNYTLDWAMDK	FHNYTLDWAMDK[687]	2	y	1	2	11.3	CRH1-N177YT	0	FALSE	0	0.99	FALSE	1
712	262.14	11.3	CRH1-N177YT		1	FHNYTLDWAMDK	FHNYTLDWAMDK[712]	2	y	1	2	11.3	CRH1-N177YT	0	FALSE	0	0.99	FALSE	1
737	262.14	11.3	CRH1-N177YT		1	FHNYTLDWAMDK	FHNYTLDWAMDK[737]	2	y	1	2	11.3	CRH1-N177YT	0	FALSE	0	0.99	FALSE	1
762	262.14	11.3	CRH1-N177YT		1	FHNYTLDWAMDK	FHNYTLDWAMDK[762]	2	y	1	2	11.3	CRH1-N177YT	0	FALSE	0	0.99	FALSE	1
787	262.14	11.3	CRH1-N177YT		1	FHNYTLDWAMDK	FHNYTLDWAMDK[787]	2	y	1	2	11.3	CRH1-N177YT	0	FALSE	0	0.99	FALSE	1
812	262.14	11.3	CRH1-N177YT		1	FHNYTLDWAMDK	FHNYTLDWAMDK[812]	2	y	1	2	11.3	CRH1-N177YT	0	FALSE	0	0.99	FALSE	1
837	262.14	11.3	CRH1-N177YT		1	FHNYTLDWAMDK	FHNYTLDWAMDK[837]	2	y	1	2	11.3	CRH1-N177YT	0	FALSE	0	0.99	FALSE	1
862	262.14	11.3	CRH1-N177YT		1	FHNYTLDWAMDK	FHNYTLDWAMDK[862]	2	y	1	2	11.3	CRH1-N177YT	0	FALSE	0	0.99	FALSE	1
887	262.14	11.3	CRH1-N177YT		1	FHNYTLDWAMDK	FHNYTLDWAMDK[887]	2	y	1	2	11.3	CRH1-N177YT	0	FALSE	0	0.99	FALSE	1
912	262.14	11.3	CRH1-N177YT		1	FHNYTLDWAMDK	FHNYTLDWAMDK[912]	2	y	1	2	11.3	CRH1-N177YT	0	FALSE	0	0.99	FALSE	1
937	262.14	11.3	CRH1-N177YT		1	FHNYTLDWAMDK	FHNYTLDWAMDK[937]	2	y	1	2	11.3	CRH1-N177YT	0	FALSE	0	0.99	FALSE	1
962	262.14	11.3	CRH1-N177YT		1	FHNYTLDWAMDK	FHNYTLDWAMDK[962]	2	y	1	2	11.3	CRH1-N177YT	0	FALSE	0	0.99	FALSE	1
987	262.14	11.3	CRH1-N177YT		1	FHNYTLDWAMDK	FHNYTLDWAMDK[987]	2	y	1	2	11.3	CRH1-N177YT	0	FALSE	0	0.99	FALSE	1
1012	262.14	11.3	CRH1-N177YT		1	FHNYTLDWAMDK	FHNYTLDWAMDK[1012]	2	y	1	2	11.3	CRH1-N177YT	0	FALSE	0	0.99	FALSE	1
1037	262.14	11.3	CRH1-N177YT		1	FHNYTLDWAMDK	FHNYTLDWAMDK[1037]	2	y	1	2	11.3	CRH1-N177YT	0	FALSE	0	0.99	FALSE	1
1062	262.14	11.3	CRH1-N177YT		1	FHNYTLDWAMDK	FHNYTLDWAMDK[1062]	2	y	1	2	11.3	CRH1-N177YT	0	FALSE	0	0.99	FALSE	1
1087	262.14	11.3	CRH1-N177YT		1	FHNYTLDWAMDK	FHNYTLDWAMDK[1087]	2	y	1	2	11.3	CRH1-N177YT	0	FALSE	0	0.99	FALSE	1
1112	262.14	11.3	CRH1-N177YT		1	FHNYTLDWAMDK	FHNYTLDWAMDK[1112]	2	y	1	2	11.3	CRH1-N177YT	0	FALSE	0	0.99	FALSE	1
1137	262.14	11.3	CRH1-N177YT		1	FHNYTLDWAMDK	FHNYTLDWAMDK[1137]	2	y	1	2	11.3	CRH1-N177YT	0	FALSE	0	0.99	FALSE	1
1162	262.14	11.3	CRH1-N177YT		1	FHNYTLDWAMDK	FHNYTLDWAMDK[1162]	2	y	1	2	11.3	CRH1-N177YT	0	FALSE	0	0.99	FALSE	1
1187	262.14	11.3	CRH1-N177YT		1	FHNYTLDWAMDK	FHNYTLDWAMDK[1187]	2	y	1	2	11.3	CRH1-N177YT	0	FALSE	0	0.99	FALSE	1
1212	262.14	11.3	CRH1-N177YT		1	FHNYTLDWAMDK	FHNYTLDWAMDK[1212]	2	y	1	2	11.3	CRH1-N177YT	0	FALSE	0	0.99	FALSE	1
1237	262.14	11.3	CRH1-N177YT		1	FHNYTLDWAMDK	FHNYTLDWAMDK[1237]	2	y	1	2	11.3	CRH1-N177YT	0	FALSE	0	0.99	FALSE	1
412.5	143.071	11.3	CRH1-N177YT		1	FHNYTLDWAMDK	FHNYTLDWAMDK[412]	2	b	2	2	11.3	CRH1-N177YT	0	FALSE	0	0.99	FALSE	1
437	143.071	11.3	CRH1-N177YT		1	FHNYTLDWAMDK	FHNYTLDWAMDK[437]	2	b	2	2	11.3	CRH1-N177YT	0	FALSE	0	0.99	FALSE	1
462	143.071	11.3	CRH1-N177YT		1	FHNYTLDWAMDK	FHNYTLDWAMDK[462]	2	b	2	2	11.3	CRH1-N177YT	0	FALSE	0	0.99	FALSE	1
487	143.071	11.3	CRH1-N177YT		1	FHNYTLDWAMDK	FHNYTLDWAMDK[487]	2	b	2	2	11.3	CRH1-N177YT	0	FALSE	0	0.99	FALSE	1
512	143.071	12.3	CRH1-N177YT		1	FHNYTLDWAMDK	FHNYTLDWAMDK[512]	2	b	2	2	12.3	CRH1-N177YT	0	FALSE	0	0.99	FALSE	1
537	143.071	11.3	CRH1-N177YT		1	FHNYTLDWAMDK	FHNYTLDWAMDK[537]	2	b	2	2	11.3	CRH1-N177YT	0	FALSE	0	0.99	FALSE	1
562	143.071	11.3	CRH1-N177YT		1	FHNYTLDWAMDK	FHNYTLDWAMDK[562]	2	b	2	2	11.3	CRH1-N177YT	0	FALSE	0	0.99	FALSE	1
587	143.071	11.3	CRH1-N177YT		1	FHNYTLDWAMDK	FHNYTLDWAMDK[587]	2	b	2	2	11.3	CRH1-N177YT	0	FALSE	0	0.99	FALSE	1
612	143.071	11.3	CRH1-N177YT		1	FHNYTLDWAMDK	FHNYTLDWAMDK[612]	2	b	2	2	11.3	CRH1-N177YT	0	FALSE	0	0.99	FALSE	1
637	143.071	11.3	CRH1-N177YT		1	FHNYTLDWAMDK	FHNYTLDWAMDK[637]	2	b	2	2	11.3	CRH1-N177YT	0	FALSE	0	0.99	FALSE	1
662	143.071	11.3	CRH1-N177YT		1	FHNYTLDWAMDK	FHNYTLDWAMDK[662]	2	b	2	2	11.3	CRH1-N177YT	0	FALSE	0	0.99	FALSE	1
687	143.071	11.3	CRH1-N177YT		1	FHNYTLDWAMDK	FHNYTLDWAMDK[687]	2	b	2	2	11.3	CRH1-N177YT	0	FALSE	0	0.99	FALSE	1
712	143.071	11.3	CRH1-N177YT		1	FHNYTLDWAMDK	FHNYTLDWAMDK[712]	2	b	2	2	11.3	CRH1-N177YT	0	FALSE	0	0.99	FALSE	1
737	143.071	11.3	CRH1-N177YT		1	FHNYTLDWAMDK	FHNYTLDWAMDK[737]	2	b	2	2	11.3	CRH1-N177YT	0	FALSE	0	0.99	FALSE	1
762	143.071	11.3	CRH1-N177YT		1	FHNYTLDWAMDK	FHNYTLDWAMDK[762]	2	b	2	2	11.3	CRH1-N177YT	0	FALSE	0	0.99	FALSE	1
787	143.071	11.3	CRH1-N177YT		1	FHNYTLDWAMDK	FHNYTLDWAMDK[787]	2	b	2	2	11.3	CRH1-N177YT	0	FALSE	0	0.99	FALSE	1
812	143.071	11.3	CRH1-N177YT		1	FHNYTLDWAMDK	FHNYTLDWAMDK[812]	2	b	2	2	11.3	CRH1-N177YT	0	FALSE	0	0.99	FALSE	1
837	143.071	11.3	CRH1-N177YT		1	FHNYTLDWAMDK	FHNYTLDWAMDK[837]	2	b	2	2	11.3	CRH1-N177YT	0	FALSE	0	0.99	FALSE	1
862	143.071	11.3	CRH1-N177YT		1	FHNYTLDWAMDK	FHNYTLDWAMDK[862]	2	b	2	2	11.3	CRH1-N177YT	0	FALSE	0	0.99	FALSE	1
887	143.071	11.3	CRH1-N177YT		1	FHNYTLDWAMDK	FHNYTLDWAMDK[887]	2	b	2	2	11.3	CRH1-N177YT	0	FALSE	0	0.99	FALSE	1
912	143.071	11.3	CRH1-N177YT		1	FHNYTLDWAMDK	FHNYTLDWAMDK[912]	2	b	2	2	11.3	CRH1-N177YT	0	FALSE	0	0.99	FALSE	1
937	143.071	11.3	CRH1-N177YT		1	FHNYTLDWAMDK	FHNYTLDWAMDK[937]	2	b	2	2	11.3	CRH1-N177YT	0	FALSE	0	0.99	FALSE	1
962	143.071	11.3	CRH1-N177YT		1	FHNYTLDWAMDK	FHNYTLDWAMDK[962]	2	b	2	2	11.3	CRH1-N177YT	0	FALSE	0	0.99	FALSE	1
987	143.071	11.3	CRH1-N177YT		1	FHNYTLDWAMDK	FHNYTLDWAMDK[987]	2	b	2	2	11.3	CRH1-N177YT	0	FALSE	0	0.99	FALSE	1
1012	143.071	11.3	CRH1-N177YT		1	FHNYTLDWAMDK	FHNYTLDWAMDK[1012]	2	b	2	2	11.3	CRH1-N177YT	0	FALSE	0	0.99	FALSE	1
1037	143.071	11.3	CRH1-N177YT		1	FHNYTLDWAMDK	FHNYTLDWAMDK[1037]	2	b	2	2	11.3	CRH1-N177YT	0	FALSE	0	0.99	FALSE	1
1062	143.071	11.3	CRH1-N177YT		1	FHNYTLDWAMDK	FHNYTLDWAMDK[1062]	2	b	2	2	11.3	CRH1-N177YT	0	FALSE	0	0.99	FALSE	1
1087	143.071	11.3	CRH1-N177YT		1	FHNYTLDWAMDK	FHNYTLDWAMDK[1087]	2	b	2	2	11.3	CRH1-N177YT	0	FALSE	0	0.99	FALSE	1
1112	143.071	11.3	CRH1-N177YT		1	FHNYTLDWAMDK	FHNYTLDWAMDK[1112]	2	b	2	2	11.3	CRH1-N177YT	0	FALSE	0	0.99	FALSE	1
1137	143.071	11.3	CRH1-N177YT		1	FHNYTLDWAMDK	FHNYTLDWAMDK[1137]	2	b	2	2	11.3	CRH1-N177YT	0	FALSE	0	0.99	FALSE	1
1162	143.071	11.3	CRH1-N177YT		1	FHNYTLDWAMDK	FHNYTLDWAMDK[1162]	2	b	2	2	11.3	CRH1-N177YT	0	FALSE	0	0.99	FALSE	1
1187	143.071	11.3	CRH1-N177YT		1	FHNYTLDWAMDK	FHNYTLDWAMDK[1187]	2	b	2	2	11.3	CRH1-N177YT	0	FALSE	0	0.99	FALSE	1
1212	143.071	11.3	CRH1-N177YT		1	FHNYTLDWAMDK	FHNYTLDWAMDK[1212]	2	b	2	2	11.3	CRH1-N177YT	0	FALSE	0	0.99	FALSE	1
1237	143.071	11.3	CRH1-N177YT		1	FHNYTLDWAMDK	FHNYTLDWAMDK[1237]	2	b	2	2	11.3	CRH1-N177YT	0	FALSE	0	0.99	FALSE	1
412.5	131.573	11.3	CRH1-N177YT		1	FHNYTLDWAMDK	FHNYTLDWAMDK[412]	2	y	2	2	11.3	CRH1-N177YT	0	FALSE	0	0.99	FALSE	1
437	131.573	11.3	CRH1-N177YT		1	FHNYTLDWAMDK	FHNYTLDWAMDK[437]	2	y	2	2	11.3	CRH1-N177YT	0	FALSE	0	0.99	FALSE	1
462	131.573	11.3	CRH1-N177YT		1	FHNYTLDWAMDK	FHNYTLDWAMDK[462]	2	y	2	2	11.3	CRH1-N177YT	0	FALSE	0	0.99	FALSE	1
487	131.573	11.3	CRH1-N177YT		1	FHNYTLDWAMDK	FHNYTLDWAMDK[487]	2	y	2	2	11.3	CRH1-N177YT	0	FALSE	0	0.99	FALSE	1
512	131.573	12.3	CRH1-N177YT		1	FHNYTLDWAMDK	FHNYTLDWAMDK[512]	2	y	2	2	12.3	CRH1-N177YT	0	FALSE	0	0.99	FALSE	1
537	131.573	11.3	CRH1-N177YT		1	FHNYTLDWAMDK	FHNYTLDWAMDK[537]	2	y	2	2	11.3	CRH1-N177YT	0	FALSE	0	0.99	FALSE	1
562	131.573	11.3	CRH1-N177YT		1	FHNYTLDWAMDK	FHNYTLDWAMDK[562]	2	y	2	2	11.3	CRH1-N177YT	0	FALSE	0	0.99	FALSE	1
587	131.573	11.3	CRH1-N177YT		1	FHNYTLDWAMDK	FHNYTLDWAMDK[587]	2	y	2	2	11.3	CRH1-N177YT	0	FALSE	0	0.99	FALSE	1
612	131.573	11.3	CRH1-N177YT		1	FHNYTLDWAMDK	FHNYTLDWAMDK[612]	2	y	2	2	11.3	CRH1-N177YT	0	FALSE	0	0.99	FALSE	1
637	131.573	11.3	CRH1-N177YT		1	FHNYTLDWAMDK	FHNYTLDWAMDK[637]	2	y	2	2	11.3	CRH1-N177YT	0	FALSE	0	0.99	FALSE	1
662	131.573	11.3	CRH1-N177YT		1	FHNYTLDWAMDK	FHNYTLDWAMDK[662]	2	y	2	2	11.3	CRH1-N177YT	0	FALSE	0	0.99	FALSE	1
687	131.573	11.3	CRH1-N177YT		1	FHNYTLDWAMDK	FHNYTLDWAMDK[687]	2	y	2	2	11.3	CRH1-N177YT	0	FALSE	0	0.99	FALSE	1
712	131.573	11.3	CRH1-N177YT		1	FHNYTLDWAMDK	FHNYTLDWAMDK[712]	2	y	2	2	11.3	CRH1-N177YT	0	FALSE	0	0.99	FALSE	1
737	131.573	11.3	CRH1-N177YT		1	FHNYTLDWAMDK	FHNYTLDWAMDK[737]	2	y	2	2	11.3	CRH1-N177YT	0	FALSE	0	0.99	FALSE	1
762	131.573	11.3	CRH1-N177YT		1	FHNYTLDWAMDK	FHNYTLDWAMDK[762]	2	y	2	2	11.3	CRH1-N177YT	0	FALSE	0	0.99	FALSE	1
787	131.573	11.3	CRH1-N177YT		1	FHNYTLDWAMDK	FHNYTLDWAMDK[787]	2	y	2	2	11.3	CRH1-N177YT	0	FALSE	0	0.99	FALSE	1
812	131.573	11.3	CRH1-N177YT		1	FHNYTLDWAMDK	FHNYTLDWAMDK[812]	2	y	2	2	11.3	CRH1-N177YT	0	FALSE	0	0.99	FALSE	1
837	131.573	11.3	CRH1-N177YT		1	FHNYTLDWAMDK	FHNYTLDWAMDK[837]	2	y	2	2	11.3	CRH1-N177YT	0	FALSE	0	0.99	FALSE	1
862	131.573	11.3	CRH1-N177YT		1	FHNYTLDWAMDK	FHNYTLDWAMDK[862]	2	y	2	2	11.3	CRH1-N177YT	0	FALSE	0	0.99	FALSE	1
887	131.573	11.3	CRH1-N177YT		1	FHNYTLDWAMDK	FHNYTLDWAMDK[887]	2	y	2	2	11.3	CRH1-N177YT	0	FALSE	0	0.99	FALSE	1
912	131.573	11.3	CRH1-N177YT		1	FHNYTLDWAMDK	FHNYTLDWAMDK[912]	2	y	2	2	11.3	CRH1-N177YT	0	FALSE	0	0.99	FALSE	1
937	131.573	11.3	CRH1-N177YT		1	FHNYTLDWAMDK	FHNYTLDWAMDK[937]	2	y	2	2	11.3	CRH1-N177YT	0	FALSE	0	0.99	FALSE	1
962	131.573	11.3	CRH1-N177YT		1	FHNYTLDWAMDK	FHNYTLDWAMDK[962]	2	y	2	2	11.3	CRH1-N177YT	0	FALSE	0	0.99	FALSE	1
987	131.573	11.3	CRH1-N177YT		1	FHNYTLDWAMDK	FHNYTLDWAMDK[987]	2	y	2	2	11.3	CRH1-N177YT	0	FALSE	0	0.99	FALSE	1
1012	131.573	11.3	CRH1-N177YT		1	FHNYTLDWAMDK	FHNYTLDWAMDK[1012]	2	y	2	2	11.3	CRH1-N177YT	0	FALSE	0	0.99	FALSE	1
1037	131.573	11.3	CRH1-N177YT		1	FHNYTLDWAMDK	FHNYTLDWAMDK[1037]	2	y	2	2	11.3	CRH1-N177YT	0	FALSE	0	0.99	FALSE	1
1062	131.573	11.3	CRH1-N177YT		1	FHNYTLDWAMDK	FHNYTLDWAMDK[1062]	2	y	2	2	11.3	CRH1-N177YT	0	FALSE	0	0.99	FALSE	1
1087	131.573	11.3	CRH1-N177YT		1	FHNYTLDWAMDK	FHNYTLDWAMDK[1087]	2	y	2	2	11.3	CRH1-N177YT	0	FALSE	0	0.99	FALSE	1
1112	131.573	11.3	CRH1-N177YT		1	FHNYTLDWAMDK	FHNYTLDWAMDK[1112]	2	y	2	2	11.3	CRH1-N177YT	0	FALSE	0	0.99	FALSE	1
1137	131.573	11.3	CRH1-N177YT		1	FHNYTLDWAMDK	FHNYTLDWAMDK[1137]	2	y	2	2	11.3	CRH1-N177YT	0	FALSE	0	0.99	FALSE	1
1162	131.573	11.3	CRH1-N177YT		1	FHNYTLDWAMDK	FHNYTLDWAMDK[1162]	2	y	2	2	11.3	CRH1-N177YT	0	FALSE	0	0.99	FALSE	1
1187	131.573	11.3	CRH1-N177YT		1	FHNYTLDWAMDK	FHNYTLDWAMDK[1187]	2	y	2	2	11.3	CRH1-N177YT	0	FALSE	0	0.99	FALSE	1
1212	131.573	11.3	CRH1-N177YT		1	FHNYTLDWAMDK	FHNYTLDWAMDK[1212]	2	y	2	2	11.3	CRH1-N177YT	0	FALSE	0	0.99	FALSE	1
1237	131.573	11.3	CRH1-N177YT		1	FHNYTLDWAMDK	FHNYTLDWAMDK[1237]	2	y	2	2	11.3	CRH1-N177YT	0	FALSE	0	0.99	FALSE	1
412.5	393.18	11.3	CRH1-N177YT		1	FHNYTLDWAMDK	FHNYTLDWAMDK[412]	2	y	1	3	11.3	CRH1-N177YT	0	FALSE	0	0.99	FALSE	1
437	393.18	11.3	CRH1-N177YT		1	FHNYTLDWAMDK	FHNYTLDWAMDK[437]	2	y	1	3	11.3	CRH1-N177YT	0	FALSE	0	0.99	FALSE	1
462	393.18	11.3	CRH1-N177YT		1	FHNYTLDWAMDK	FHNYTLDWAMDK[462]	2	y	1	3	11.3	CRH1-N177YT	0	FALSE	0	0.99	FALSE	1
487	393.18	11.3	CRH1-N177YT		1	FHNYTLDWAMDK	FHNYTLDWAMDK[487]	2	y	1	3	11.3	CRH1-N177YT	0	FALSE	0	0.99	FALSE	1
512	393.18	12.3	CRH1-N177YT		1	FHNYTLDWAMDK	FHNYTLDWAMDK[512]	2	y	1	3	12.3	CRH1-N177YT	0	FALSE	0	0.99	FALSE	1
537	393.18	11.3	CRH1-N177YT		1	FHNYTLDWAMDK	FHNYTLDWAMDK[537]	2	y	1	3	11.3	CRH1-N177YT	0	FALSE	0	0.99	FALSE	1
562	393.18	11.3	CRH1-N177YT		1	FHNYTLDWAMDK	FHNYTLDWAMDK[562]	2	y	1	3	11.3	CRH1-N177YT	0	FALSE	0	0.99	FALSE	1
587	393.18	11.3	CRH1-N177YT		1	FHNYTLDWAMDK	FHNYTLDWAMDK[587]	2	y	1	3	11.3	CRH1-N177YT	0	FALSE	0	0.99	FALSE	1
612	393.18	11.3	CRH1-N177YT		1	FHNYTLDWAMDK	FHNYTLDWAMDK[612]	2	y	1	3	11.3	CRH1-N177YT	0	FALSE	0	0.99	FALSE	1
637	393.18	11.3	CRH1-N177YT		1	FHNYTLDWAMDK	FHNYTLDWAMDK[637]	2	y	1	3	11.3	CRH1-N177YT	0	FALSE	0	0.99	FALSE	1
662	393.18	11.3	CRH1-N177YT		1	FHNYTLDWAMDK	FHNYTLDWAMDK[662]	2	y	1	3	11.3	CRH1-N177YT	0	FALSE	0	0.99	FALSE	1
687	393.18	11.3	CRH1-N177YT		1	FHNYTLDWAMDK	FHNYTLDWAMDK[687]	2	y	1	3	11.3	CRH1-N177YT	0	FALSE	0	0.99	FALSE	1
712	393.18	11.3	CRH1-N177YT		1	FHNYTLDWAMDK	FHNYTLDWAMDK[712]	2	y	1	3	11.3	CRH1-N177YT	0	FALSE	0	0.99	FALSE	1
737	393.18	11.3	CRH1-N177YT		1	FHNYTLDWAMDK	FHNYTLDWAMDK[737]	2	y	1	3	11.3	CRH1-N177YT	0	FALSE	0	0.99	FALSE	1
762	393.18	11.3	CRH1-N177YT		1	FHNYTLDWAMDK	FHNYTLDWAMDK[762]	2	y	1	3	11.3	CRH1-N177YT	0	FALSE	0	0.99	FALSE	1
787	393.18	11.3	CRH1-N177YT		1	FHNYTLDWAMDK	FHNYTLDWAMDK[787]	2	y	1	3	11.3	CRH1-N177YT	0	FALSE	0	0.99	FALSE	1
812	393.18	11.3	CRH1-N177YT		1	FHNYTLDWAMDK	FHNYTLDWAMDK[812]	2	y	1	3	11.3	CRH1-N177YT	0	FALSE	0	0.99	FALSE	1
837	393.18	11.3	CRH1-N177YT		1	FHNYTLDWAMDK	FHNYTLDWAMDK[837]	2	y	1	3	11.3	CRH1-N177YT	0	FALSE	0	0.99	FALSE	1
862	393.18	11.3	CRH1-N177YT		1	FHNYTLDWAMDK	FHNYTLDWAMDK[862]	2	y	1	3	11.3	CRH1-N177YT	0	FALSE	0	0.99	FALSE	1
887	393.18	11.3	CRH1-N177YT		1	FHNYTLDWAMDK	FHNYTLDWAMDK[887]	2	y	1	3	11.3	CRH1-N177YT	0	FALSE	0	0.99	FALSE	1
912	393.18	11.3	CRH1-N177YT		1	FHNYTLDWAMDK	FHNYTLDWAMDK[912]	2	y	1	3	11.3	CRH1-N177YT	0	FALSE	0	0.99	FALSE	1
937	393.18	11.3	CRH1-N177YT		1	FHNYTLDWAMDK	FHNYTLDWAMDK[937]	2	y	1	3	11.3	CRH1-N177YT	0	FALSE	0	0.99	FALSE	1
962	393.18	11.3	CRH1-N177YT		1	FHNYTLDWAMDK	FHNYTLDWAMDK[962]	2	y	1	3	11.3	CRH1-N177YT	0	FALSE	0	0.99	FALSE	1
987	393.18	11.3	CRH1-N177YT		1	FHNYTLDWAMDK	FHNYTLDWAMDK[987]	2	y	1	3	11.3	CRH1-N177YT	0	FALSE	0	0.99	FALSE	1
1012	393.18	11.3	CRH1-N177YT		1	FHNYTLDWAMDK	FHNYTLDWAMDK[1012]	2	y	1	3	11.3	CRH1-N177YT	0	FALSE	0	0.99	FALSE	1
1037	393.18	11.3	CRH1-N177YT		1	FHNYTLDWAMDK	FHNYTLDWAMDK[1037]	2	y	1	3	11.3	CRH1-N177YT	0	FALSE	0	0.99	FALSE	1
1062	393.18	11.3	CRH1-N177YT		1	FHNYTLDWAMDK	FHNYTLDWAMDK[1062]	2	y	1	3	11.3	CRH1-N177YT	0	FALSE	0	0.99	FALSE	1
1087	393.18	11.3	CRH1-N177YT		1	FHNYTLDWAMDK	FHNYTLDWAMDK[1087]	2	y	1	3	11.3	CRH1-N177YT	0	FALSE	0	0.99	FALSE	1
1112	393.18	11.3	CRH1-N177YT		1	FHNYTLDWAMDK	FHNYTLDWAMDK[1112]	2	y	1	3	11.3	CRH1-N177YT	0	FALSE	0	0.99	FALSE	1
1137	393.18	11.3	CRH1-N177YT		1	FHNYTLDWAMDK	FHNYTLDWAMDK[1137]	2	y	1	3	11.3	CRH1-N177YT	0	FALSE	0	0.99	FALSE	1
1162	393.18	11.3	CRH1-N177YT		1	FHNYTLDWAMDK	FHNYTLDWAMDK[1162]	2	y	1	3	11.3	CRH1-N177YT	0	FALSE	0	0.99	FALSE	1
1187	393.18	11.3	CRH1-N177YT		1	FHNYTLDWAMDK	FHNYTLDWAMDK[1187]	2	y	1	3	11.3	CRH1-N177YT	0	FALSE	0	0.99	FALSE	1
1212	393.18	11.3	CRH1-N177YT		1	FHNYTLDWAMDK	FHNYTLDWAMDK[1212]	2	y	1	3	11.3	CRH1-N177YT	0	FALSE	0	0.99	FALSE	1
1237	393.18	11.3	CRH1-N177YT		1	FHNYTLDWAMDK	FHNYTLDWAMDK[1237]	2	y	1	3	11.3	CRH1-N177YT	0	FALSE	0	0.99	FALSE	1
412.5	197.094	11.3	CRH1-N177YT		1	FHNYTLDWAMDK	FHNYTLDWAMDK[412]	2	y	2	3	11.3	CRH1-N177YT	0	FALSE	0	0.99	FALSE	1
437	197.094	11.3	CRH1-N177YT		1	FHNYTLDWAMDK	FHNYTLDWAMDK[437]	2	y	2	3	11.3	CRH1-N177YT	0	FALSE	0	0.99	FALSE	1
462	197.094	11.3	CRH1-N177YT		1	FHNYTLDWAMDK	FHNYTLDWAMDK[462]	2	y	2	3	11.3	CRH1-N177YT	0	FALSE	0	0.99	FALSE	1
487	197.094	11.3	CRH1-N177YT		1	FHNYTLDWAMDK	FHNYTLDWAMDK[487]	2	y	2	3	11.3	CRH1-N177YT	0	FALSE	0	0.99	FALSE	1
512	197.094	12.3	CRH1-N177YT		1	FHNYTLDWAMDK	FHNYTLDWAMDK[512]	2	y	2	3	12.3	CRH1-N177YT	0	FALSE	0	0.99	FALSE	1
537	197.094	11.3	CRH1-N177YT		1	FHNYTLDWAMDK	FHNYTLDWAMDK[537]	2	y	2	3	11.3	CRH1-N177YT	0	FALSE	0	0.99	FALSE	1
562	197.094	11.3	CRH1-N177YT		1	FHNYTLDWAMDK	FHNYTLDWAMDK[562]	2	y	2	3	11.3	CRH1-N177YT	0	FALSE	0	0.99	FALSE	1
587	197.094	11.3	CRH1-N177YT		1	FHNYTLDWAMDK	FHNYTLDWAMDK[587]	2	y	2	3	11.3	CRH1-N177YT	0	FALSE	0	0.99	FALSE	1
612	197.094	11.3	CRH1-N177YT		1	FHNYTLDWAMDK	FHNYTLDWAMDK[612]	2	y	2	3	11.3	CRH1-N177YT	0	FALSE	0	0.99	FALSE	1
637	197.094	11.3	CRH1-N177YT		1	FHNYTLDWAMDK	FHNYTLDWAMDK[637]	2	y	2	3	11.3	CRH1-N177YT	0	FALSE	0	0.99	FALSE	1
662	197.094	11.3	CRH1-N177YT		1	FHNYTLDWAMDK	FHNYTLDWAMDK[662]	2	y	2	3	11.3	CRH1-N177YT	0	FALSE	0	0.99	FALSE	1
687	197.094	11.3	CRH1-N177YT		1	FHNYTLDWAMDK	FHNYTLDWAMDK[687]	2	y	2	3	11.3	CRH1-N177YT	0	FALSE	0	0.99	FALSE	1
712	197.094	11.3	CRH1-N177YT		1	FHNYTLDWAMDK	FHNYTLDWAMDK[712]	2	y	2	3	11.3	CRH1-N177YT	0	FALSE	0	0.99	FALSE	1
737	197.094	11.3	CRH1-N177YT		1	FHNYTLDWAMDK	FHNYTLDWAMDK[737]	2	y	2	3	11.3	CRH1-N177YT	0	FALSE	0	0.99	FALSE	1
762	197.094	11.3	CRH1-N177YT		1	FHNYTLDWAMDK	FHNYTLDWAMDK[762]	2	y	2	3	11.3	CRH1-N177YT	0	FALSE	0	0.99	FALSE	1
787	197.094	11.3	CRH1-N177YT		1	FHNYTLDWAMDK	FHNYTLDWAMDK[787]	2	y	2	3	11.3	CRH1-N177YT	0	FALSE	0	0.99	FALSE	1
812	197.094	11.3	CRH1-N177YT		1	FHNYTLDWAMDK	FHNYTLDWAMDK[812]	2	y	2	3	11.3	CRH1-N177YT	0	FALSE	0	0.99	FALSE	1
837	197.094	11.3	CRH1-N177YT		1	FHNYTLDWAMDK	FHNYTLDWAMDK[837]	2	y	2	3	11.3	CRH1-N177YT	0	FALSE	0	0.99	FALSE	1
862	197.094	11.3	CRH1-N177YT		1	FHNYTLDWAMDK	FHNYTLDWAMDK[862]	2	y	2	3	11.3	CRH1-N177YT	0	FALSE	0	0.99	FALSE	1
887	197.094	11.3	CRH1-N177YT		1	FHNYTLDWAMDK	FHNYTLDWAMDK[887]	2	y	2	3	11.3	CRH1-N177YT	0	FALSE	0	0.99	FALSE	1
912	197.094	11.3	CRH1-N177YT		1	FHNYTLDWAMDK	FHNYTLDWAMDK[912]	2	y	2	3	11.3	CRH1-N177YT	0	FALSE	0	0.99	FALSE	1
937	197.094	11.3	CRH1-N177YT		1	FHNYTLDWAMDK	FHNYTLDWAMDK[937]	2	y	2	3	11.3	CRH1-N177YT	0	FALSE	0	0.99	FALSE	1
962	197.094	11.3	CRH1-N177YT		1	FHNYTLDWAMDK	FHNYTLDWAMDK[962]	2	y	2	3	11.3	CRH1-N177YT	0	FALSE	0	0.99	FALSE	1
987	197.094	11.3	CRH1-N177YT		1	FHNYTLDWAMDK	FHNYTLDWAMDK[987]	2	y	2	3	11.3	CRH1-N177YT	0	FALSE	0	0.99	FALSE	1
1012	197.094	11.3	CRH1-N177YT		1	FHNYTLDWAMDK	FHNYTLDWAMDK[1012]	2	y	2	3	11.3	CRH1-N177YT	0	FALSE	0	0.99	FALSE	1
1037	197.094	11.3	CRH1-N177YT		1	FHNYTLDWAMDK	FHNYTLDWAMDK[1037]	2	y	2	3	11.3	CRH1-N177YT	0	FALSE	0	0.99	FALSE	1
1062	197.094	11.3	CRH1-N177YT		1	FHNYTLDWAMDK	FHNYTLDWAMDK[1062]	2	y	2	3	11.3	CRH1-N177YT	0	FALSE	0	0.99	FALSE	1
1087	197.094	11.3	CRH1-N177YT		1	FHNYTLDWAMDK	FHNYTLDWAMDK[1087]	2	y	2	3	11.3	CRH1-N177YT	0	FALSE	0	0.99	FALSE	1
1112	197.094	11.3	CRH1-N177YT		1	FHNYTLDWAMDK	FHNYTLDWAMDK[1112]	2	y	2	3	11.3	CRH1-N177YT	0	FALSE	0	0.99	FALSE	1
1137	197.094	11.3	CRH1-N177YT		1	FHNYTLDWAMDK	FHNYTLDWAMDK[1137]	2	y	2	3	11.3	CRH1-N177YT	0	FALSE	0	0.99	FALSE	1
1162	197.094	11.3	CRH1-N177YT		1	FHNYTLDWAMDK	FHNYTLDWAMDK[1162]	2	y	2	3	11.3	CRH1-N177YT	0	FALSE	0	0.99	FALSE	1
1187	197.094	11.3	CRH1-N177YT		1	FHNYTLDWAMDK	FHNYTLDWAMDK[1187]	2	y	2	3	11.3	CRH1-N177YT	0	FALSE	0	0.99	FALSE	1
1212	197.094	11.3	CRH1-N177YT		1	FHNYTLDWAMDK	FHNYTLDWAMDK[1212]	2	y	2	3	11.3	CRH1-N177YT	0	FALSE	0	0.99	FALSE	1
1237	197.094	11.3	CRH1-N177YT		1	FHNYTLDWAMDK	FHNYTLDWAMDK[1237]	2	y	2	3	11.3	CRH1-N177YT	0	FALSE	0	0.99	FALSE	1
412.5	464.217	11.3	CRH1-N177YT		1	FHNYTLDWAMDK	FHNYTLDWAMDK[412]	2	y	1	4	11.3	CRH1-N177YT	0	FALSE	0	0.99	FALSE	1
437	464.217	11.3	CRH1-N177YT		1	FHNYTLDWAMDK	FHNYTLDWAMDK[437]	2	y	1	4	11.3	CRH1-N177YT	0	FALSE	0	0.99	FALSE	1
462	464.217	11.3	CRH1-N177YT		1	FHNYTLDWAMDK	FHNYTLDWAMDK[462]	2	y	1	4	11.3	CRH1-N177YT	0	FALSE	0	0.99	FALSE	1
487	464.217	11.3	CRH1-N177YT		1	FHNYTLDWAMDK	FHNYTLDWAMDK[487]	2	y	1	4	11.3	CRH1-N177YT	0	FALSE	0	0.99	FALSE	1
512	464.217	12.3	CRH1-N177YT		1	FHNYTLDWAMDK	FHNYTLDWAMDK[512]	2	y	1	4	12.3	CRH1-N177YT	0	FALSE	0	0.99	FALSE	1
537	464.217	11.3	CRH1-N177YT		1	FHNYTLDWAMDK	FHNYTLDWAMDK[537]	2	y	1	4	11.3	CRH1-N177YT	0	FALSE	0	0.99	FALSE	1
562	464.217	11.3	CRH1-N177YT		1	FHNYTLDWAMDK	FHNYTLDWAMDK[562]	2	y	1	4	11.3	CRH1-N177YT	0	FALSE	0	0.99	FALSE	1
587	464.217	11.3	CRH1-N177YT		1	FHNYTLDWAMDK	FHNYTLDWAMDK[587]	2	y	1	4	11.3	CRH1-N177YT	0	FALSE	0	0.99	FALSE	1
612	464.217	11.3	CRH1-N177YT		1	FHNYTLDWAMDK	FHNYTLDWAMDK[612]	2	y	1	4	11.3	CRH1-N177YT	0	FALSE	0	0.99	FALSE	1
637	464.217	11.3	CRH1-N177YT		1	FHNYTLDWAMDK	FHNYTLDWAMDK[637]	2	y	1	4	11.3	CRH1-N177YT	0	FALSE	0	0.99	FALSE	1
662	464.217	11.3	CRH1-N177YT		1	FHNYTLDWAMDK	FHNYTLDWAMDK[662]	2	y	1	4	11.3	CRH1-N177YT	0	FALSE	0	0.99	FALSE	1
687	464.217	11.3	CRH1-N177YT		1	FHNYTLDWAMDK	FHNYTLDWAMDK[687]	2	y	1	4	11.3	CRH1-N177YT	0	FALSE	0	0.99	FALSE	1
712	464.217	11.3	CRH1-N177YT		1	FHNYTLDWAMDK	FHNYTLDWAMDK[712]	2	y	1	4	11.3	CRH1-N177YT	0	FALSE	0	0.99	FALSE	1
737	464.217	11.3	CRH1-N177YT		1	FHNYTLDWAMDK	FHNYTLDWAMDK[737]	2	y	1	4	11.3	CRH1-N177YT	0	FALSE	0	0.99	FALSE	1
762	464.217	11.3	CRH1-N177YT		1	FHNYTLDWAMDK	FHNYTLDWAMDK[762]	2	y	1	4	11.3	CRH1-N177YT	0	FALSE	0	0.99	FALSE	1
787	464.217	11.3	CRH1-N177YT		1	FHNYTLDWAMDK	FHNYTLDWAMDK[787]	2	y	1	4	11.3	CRH1-N177YT	0	FALSE	0	0.99	FALSE	1
812	464.217	11.3	CRH1-N177YT		1	FHNYTLDWAMDK	FHNYTLDWAMDK[812]	2	y	1	4	11.3	CRH1-N177YT	0	FALSE	0	0.99	FALSE	1
837	464.217	11.3	CRH1-N177YT		1	FHNYTLDWAMDK	FHNYTLDWAMDK[837]	2	y	1	4	11.3	CRH1-N177YT	0	FALSE	0	0.99	FALSE	1
862	464.217	11.3	CRH1-N177YT		1	FHNYTLDWAMDK	FHNYTLDWAMDK[862]	2	y	1	4	11.3	CRH1-N177YT	0	FALSE	0	0.99	FALSE	1
887	464.217	11.3	CRH1-N177YT		1	FHNYTLDWAMDK	FHNYTLDWAMDK[887]	2	y	1	4	11.3	CRH1-N177YT	0	FALSE	0	0.99	FALSE	1
912	464.217	11.3	CRH1-N177YT		1	FHNYTLDWAMDK	FHNYTLDWAMDK[912]	2	y	1	4	11.3	CRH1-N177YT	0	FALSE	0	0.99	FALSE	1
937	464.217	11.3	CRH1-N177YT		1	FHNYTLDWAMDK	FHNYTLDWAMDK[937]	2	y	1	4	11.3	CRH1-N177YT	0	FALSE	0	0.99	FALSE	1
962	464.217	11.3	CRH1-N177YT		1	FHNYTLDWAMDK	FHNYTLDWAMDK[962]	2	y	1	4	11.3	CRH1-N177YT	0	FALSE	0	0.99	FALSE	1
987	464.217	11.3	CRH1-N177YT		1	FHNYTLDWAMDK	FHNYTLDWAMDK[987]	2	y	1	4	11.3	CRH1-N177YT	0	FALSE	0	0.99	FALSE	1
1012	464.217	11.3	CRH1-N177YT		1	FHNYTLDWAMDK	FHNYTLDWAMDK[1012]	2	y	1	4	11.3	CRH1-N177YT	0	FALSE	0	0.99	FALSE	1
1037	464.217	11.3	CRH1-N177YT		1	FHNYTLDWAMDK	FHNYTLDWAMDK[1037]	2	y	1	4	11.3	CRH1-N177YT	0	FALSE	0	0.99	FALSE	1
1062	464.217	11.3	CRH1-N177YT		1	FHNYTLDWAMDK	FHNYTLDWAMDK[1062]	2	y	1	4	11.3	CRH1-N177YT	0	FALSE	0	0.99	FALSE	1
1087	464.217	11.3	CRH1-N177YT		1	FHNYTLDWAMDK	FHNYTLDWAMDK[1087]	2	y	1	4	11.3	CRH1-N177YT	0	FALSE	0	0.99	FALSE	1
1112	464.217	11.3	CRH1-N177YT		1	FHNYTLDWAMDK	FHNYTLDWAMDK[1112]	2	y	1	4	11.3	CRH1-N177YT	0	FALSE	0	0.99	FALSE	1
1137	464.217	11.3	CRH1-N177YT		1	FHNYTLDWAMDK	FHNYTLDWAMDK[1137]	2	y	1	4	11.3	CRH1-N177YT	0	FALSE	0	0.99	FALSE	1
1162	464.217	11.3	CRH1-N177YT		1	FHNYTLDWAMDK	FHNYTLDWAMDK[1162]	2	y	1	4	11.3	CRH1-N177YT	0	FALSE	0	0.99	FALSE	1
1187	464.217	11.3	CRH1-N177YT		1	FHNYTLDWAMDK	FHNYTLDWAMDK[1187]	2	y	1	4	11.3	CRH1-N177YT	0	FALSE	0	0.99	FALSE	1
1212	464.217	11.3	CRH1-N177YT		1	FHNYTLDWAMDK	FHNYTLDWAMDK[1212]	2	y	1	4	11.3	CRH1-N177YT	0	FALSE	0	0.99	FALSE	1
1237	464.217	11.3	CRH1-N177YT		1	FHNYTLDWAMDK	FHNYTLDWAMDK[1237]	2	y	1	4	11.3	CRH1-N177YT	0	FALSE	0	0.99	FALSE	1
412.5	232.612	11.3	CRH1-N177YT		1	FHNYTLDWAMDK	FHNYTLDWAMDK[412]	2	y	2	4	11.3	CRH1-N177YT	0	FALSE	0	0.99	FALSE	1
437	232.612	11.3	CRH1-N177YT		1	FHNYTLDWAMDK	FHNYTLDWAMDK[437]	2	y	2	4	11.3	CRH1-N177YT	0	FALSE	0	0.99	FALSE	1
462	232.612	11.3	CRH1-N177YT		1	FHNYTLDWAMDK	FHNYTLDWAMDK[462]	2	y	2	4	11.3	CRH1-N177YT	0	FALSE	0	0.99	FALSE	1
487	232.612	11.3	CRH1-N177YT		1	FHNYTLDWAMDK	FHNYTLDWAMDK[487]	2	y	2	4	11.3	CRH1-N177YT	0	FALSE	0	0.99	FALSE	1
512	232.612	12.3	CRH1-N177YT		1	FHNYTLDWAMDK	FHNYTLDWAMDK[512]	2	y	2	4	12.3	CRH1-N177YT	0	FALSE	0	0.99	FALSE	1
537	232.612	11.3	CRH1-N177YT		1	FHNYTLDWAMDK	FHNYTLDWAMDK[537]	2	y	2	4	11.3	CRH1-N177YT	0	FALSE	0	0.99	FALSE	1
562	232.612	11.3	CRH1-N177YT		1	FHNYTLDWAMDK	FHNYTLDWAMDK[562]	2	y	2	4	11.3	CRH1-N177YT	0	FALSE	0	0.99	FALSE	1
587	232.612	11.3	CRH1-N177YT		1	FHNYTLDWAMDK	FHNYTLDWAMDK[587]	2	y	2	4	11.3	CRH1-N177YT	0	FALSE	0	0.99	FALSE	1
612	232.612	11.3	CRH1-N177YT		1	FHNYTLDWAMDK	FHNYTLDWAMDK[612]	2	y	2	4	11.3	CRH1-N177YT	0	FALSE	0	0.99	FALSE	1
637	232.612	11.3	CRH1-N177YT		1	FHNYTLDWAMDK	FHNYTLDWAMDK[637]	2	y	2	4	11.3	CRH1-N177YT	0	FALSE	0	0.99	FALSE	1
662	232.612	11.3	CRH1-N177YT		1	FHNYTLDWAMDK	FHNYTLDWAMDK[662]	2	y	2	4	11.3	CRH1-N177YT	0	FALSE	0	0.99	FALSE	1
687	232.612	11.3	CRH1-N177YT		1	FHNYTLDWAMDK	FHNYTLDWAMDK[687]	2	y	2	4	11.3	CRH1-N177YT	0	FALSE	0	0.99	FALSE	1
712	232.612	11.3	CRH1-N177YT		1	FHNYTLDWAMDK	FHNYTLDWAMDK[712]	2	y	2	4	11.3	CRH1-N177YT	0	FALSE	0	0.99	FALSE	1
737	232.612	11.3	CRH1-N177YT		1	FHNYTLDWAMDK	FHNYTLDWAMDK[737]	2	y	2	4	11.3	CRH1-N177YT	0	FALSE	0	0.99	FALSE	1
762	232.612	11.3	CRH1-N177YT		1	FHNYTLDWAMDK	FHNYTLDWAMDK[762]	2	y	2	4	11.3	CRH1-N177YT	0	FALSE	0	0.99	FALSE	1
787	232.612	11.3	CRH1-N177YT		1	FHNYTLDWAMDK	FHNYTLDWAMDK[787]	2	y	2	4	11.3	CRH1-N177YT	0	FALSE	0	0.99	FALSE	1
812	232.612	11.3	CRH1-N177YT		1	FHNYTLDWAMDK	FHNYTLDWAMDK[812]	2	y	2	4	11.3	CRH1-N177YT	0	FALSE	0	0.99	FALSE	1
837	232.612	11.3	CRH1-N177YT		1	FHNYTLDWAMDK	FHNYTLDWAMDK[837]	2	y	2	4	11.3	CRH1-N177YT	0	FALSE	0	0.99	FALSE	1
862	232.612	11.3	CRH1-N177YT		1	FHNYTLDWAMDK	FHNYTLDWAMDK[862]	2	y	2	4	11.3	CRH1-N177YT	0	FALSE	0	0.99	FALSE	1
887	232.612	11.3	CRH1-N177YT		1	FHNYTLDWAMDK	FHNYTLDWAMDK[887]	2	y	2	4	11.3	CRH1-N177YT	0	FALSE	0	0.99	FALSE	1
912	232.612	11.3	CRH1-N177YT		1	FHNYTLDWAMDK	FHNYTLDWAMDK[912]	2	y	2	4	11.3	CRH1-N177YT	0	FALSE	0	0.99	FALSE	1
937	232.612	11.3	CRH1-N177YT		1	FHNYTLDWAMDK	FHNYTLDWAMDK[937]	2	y	2	4	11.3	CRH1-N177YT	0	FALSE	0	0.99	FALSE	1
962	232.612	11.3	CRH1-N177YT		1	FHNYTLDWAMDK	FHNYTLDWAMDK[962]	2	y	2	4	11.3	CRH1-N177YT	0	FALSE	0	0.99	FALSE	1
987	232.612	11.3	CRH1-N177YT		1	FHNYTLDWAMDK	FHNYTLDWAMDK[987]	2	y	2	4	11.3	CRH1-N177YT	0	FALSE	0	0.99	FALSE	1
1012	232.612	11.3	CRH1-N177YT		1	FHNYTLDWAMDK	FHNYTLDWAMDK[1012]	2	y	2	4	11.3	CRH1-N177YT	0	FALSE	0	0.99	FALSE	1
1037	232.612	11.3	CRH1-N177YT		1	FHNYTLDWAMDK	FHNYTLDWAMDK[1037]	2	y	2	4	11.3	CRH1-N177YT	0	FALSE	0	0.99	FALSE	1
1062	232.612	11.3	CRH1-N177YT		1	FHNYTLDWAMDK	FHNYTLDWAMDK[1062]	2	y	2	4	11.3	CRH1-N177YT	0	FALSE	0	0.99	FALSE	1
1087	232.612	11.3	CRH1-N177YT		1	FHNYTLDWAMDK	FHNYTLDWAMDK[1087]	2	y	2	4	11.3	CRH1-N177YT	0	FALSE	0	0.99	FALSE	1
1112	232.612	11.3	CRH1-N177YT		1	FHNYTLDWAMDK	FHNYTLDWAMDK[1112]	2	y	2	4	11.3	CRH1-N177YT	0	FALSE	0	0.99	FALSE	1
1137	232.612	11.3	CRH1-N177YT		1	FHNYTLDWAMDK	FHNYTLDWAMDK[1137]	2	y	2	4	11.3	CRH1-N177YT	0	FALSE	0	0.99	FALSE	1
1162	232.612	11.3	CRH1-N177YT		1	FHNYTLDWAMDK	FHNYTLDWAMDK[1162]	2	y	2	4	11.3	CRH1-N177YT	0	FALSE	0	0.99	FALSE	1
1187	232.612	11.3	CRH1-N177YT		1	FHNYTLDWAMDK	FHNYTLDWAMDK[1187]	2	y	2	4	11.3	CRH1-N177YT	0	FALSE	0	0.99	FALSE	1
1212	232.612	11.3	CRH1-N177YT		1	FHNYTLDWAMDK	FHNYTLDWAMDK[1212]	2	y	2	4	11.3	CRH1-N177YT	0	FALSE	0	0.99	FALSE	1
1237	232.612	11.3	CRH1-N177YT		1	FHNYTLDWAMDK	FHNYTLDWAMDK[1237]	2	y	2	4	11.3	CRH1-N177YT	0	FALSE	0	0.99	FALSE	1
412.5	650.297	11.3	CRH1-N177YT		1	FHNYTLDWAMDK	FHNYTLDWAMDK[412]	2	y	1	5	11.3	CRH1-N177YT	0	FALSE	0	0.99	FALSE	1
437	650.297	11.3	CRH1-N177YT		1	FHNYTLDWAMDK	FHNYTLDWAMDK[437]	2	y	1	5	11.3	CRH1-N177YT	0	FALSE	0	0.99	FALSE	1
462	650.297	11.3	CRH1-N177YT		1	FHNYTLDWAMDK	FHNYTLDWAMDK[462]	2	y	1	5	11.3	CRH1-N177YT	0	FALSE	0	0.99	FALSE	1
487	650.297	11.3	CRH1-N177YT		1	FHNYTLDWAMDK	FHNYTLDWAMDK[487]	2	y	1	5	11.3	CRH1-N177YT	0	FALSE	0	0.99	FALSE	1
512	650.297	12.3	CRH1-N177YT		1	FHNYTLDWAMDK	FHNYTLDWAMDK[512]	2	y	1	5	12.3	CRH1-N177YT	0	FALSE	0	0.99	FALSE	1
537	650.297	11.3	CRH1-N177YT		1	FHNYTLDWAMDK	FHNYTLDWAMDK[537]	2	y	1	5	11.3	CRH1-N177YT	0	FALSE	0	0.99	FALSE	1
562	650.297	11.3	CRH1-N177YT		1	FHNYTLDWAMDK	FHNYTLDWAMDK[562]	2	y	1	5	11.3	CRH1-N177YT	0	FALSE	0	0.99	FALSE	1
587	650.297	11.3	CRH1-N177YT		1	FHNYTLDWAMDK	FHNYTLDWAMDK[587]	2	y	1	5	11.3	CRH1-N177YT	0	FALSE	0	0.99	FALSE	1
612	650.297	11.3	CRH1-N177YT		1	FHNYTLDWAMDK	FHNYTLDWAMDK[612]	2	y	1	5	11.3	CRH1-N177YT	0	FALSE	0	0.99	FALSE	1
637	650.297	11.3	CRH1-N177YT		1	FHNYTLDWAMDK	FHNYTLDWAMDK[637]	2	y	1	5	11.3	CRH1-N177YT	0	FALSE	0	0.99	FALSE	1
662	650.297	11.3	CRH1-N177YT		1	FHNYTLDWAMDK	FHNYTLDWAMDK[662]	2	y	1	5	11.3	CRH1-N177YT	0	FALSE	0	0.99	FALSE	1
687	650.297	11.3	CRH1-N177YT		1	FHNYTLDWAMDK	FHNYTLDWAMDK[687]	2	y	1	5	11.3	CRH1-N177YT	0	FALSE	0	0.99	FALSE	1
712	650.297	11.3	CRH1-N177YT		1	FHNYTLDWAMDK	FHNYTLDWAMDK[712]	2	y	1	5	11.3	CRH1-N177YT	0	FALSE	0	0.99	FALSE	1
737	650.297	11.3	CRH1-N177YT		1	FHNYTLDWAMDK	FHNYTLDWAMDK[737]	2	y	1	5	11.3	CRH1-N177YT	0	FALSE	0	0.99	FALSE	1
762	650.297	11.3	CRH1-N177YT		1	FHNYTLDWAMDK	FHNYTLDWAMDK[762]	2	y	1	5	11.3	CRH1-N177YT	0	FALSE	0	0.99	FALSE	1
787	650.297	11.3	CRH1-N177YT		1	FHNYTLDWAMDK	FHNYTLDWAMDK[787]	2	y	1	5	11.3	CRH1-N177YT	0	FALSE	0	0.99	FALSE	1
812	650.297	11.3	CRH1-N177YT		1	FHNYTLDWAMDK	FHNYTLDWAMDK[812]	2	y	1	5	11.3	CRH1-N177YT	0	FALSE	0	0.99	FALSE	1
837	650.297	11.3	CRH1-N177YT		1	FHNYTLDWAMDK	FHNYTLDWAMDK[837]	2	y	1	5	11.3	CRH1-N177YT	0	FALSE	0	0.99	FALSE	1
862	650.297	11.3	CRH1-N177YT		1	FHNYTLDWAMDK	FHNYTLDWAMDK[862]	2	y	1	5	11.3	CRH1-N177YT	0	FALSE	0	0.99	FALSE	1
887	650.297	11.3	CRH1-N177YT		1	FHNYTLDWAMDK	FHNYTLDWAMDK[887]	2	y	1	5	11.3	CRH1-N177YT	0	FALSE	0	0.99	FALSE	1
912	650.297	11.3	CRH1-N177YT		1	FHNYTLDWAMDK	FHNYTLDWAMDK[912]	2	y	1	5	11.3	CRH1-N177YT	0	FALSE	0	0.99	FALSE	1
937	650.297	11.3	CRH1-N177YT		1	FHNYTLDWAMDK	FHNYTLDWAMDK[937]	2	y	1	5	11.3	CRH1-N177YT	0	FALSE	0	0.99	FALSE	1
962	650.297	11.3	CRH1-N177YT		1	FHNYTLDWAMDK	FHNYTLDWAMDK[962]	2	y	1	5	11.3	CRH1-N177YT	0	FALSE	0	0.99	FALSE	1
987	650.297	11.3	CRH1-N177YT		1	FHNYTLDWAMDK	FHNYTLDWAMDK[987]	2	y	1	5	11.3	CRH1-N177YT	0	FALSE	0	0.99	FALSE	1
1012	650.297	11.3	CRH1-N177YT		1	FHNYTLDWAMDK	FHNYTLDWAMDK[1012]	2	y	1	5	11.3	CRH1-N177YT	0	FALSE	0	0.99	FALSE	1
1037	650.297	11.3	CRH1-N177YT		1	FHNYTLDWAMDK	FHNYTLDWAMDK[1037]	2	y	1	5	11.3	CRH1-N177YT	0	FALSE	0	0.99	FALSE	1
1062	650.297	11.3	CRH1-N177YT		1	FHNYTLDWAMDK	FHNYTLDWAMDK[1062]	2	y	1	5	11.3	CRH1-N177YT	0	FALSE	0	0.99	FALSE	1
1087	650.297	11.3	CRH1-N177YT		1	FHNYTLDWAMDK	FHNYTLDWAMDK[1087]	2	y	1	5	11.3	CRH1-N177YT	0	FALSE	0	0.99	FALSE	1
1112	650.297	11.3	CRH1-N177YT		1	FHNYTLDWAMDK	FHNYTLDWAMDK[1112]	2	y	1	5	11.3	CRH1-N177YT	0	FALSE	0	0.99	FALSE	1
1137	650.297	11.3	CRH1-N177YT		1	FHNYTLDWAMDK	FHNYTLDWAMDK[1137]	2	y	1	5	11.3	CRH1-N177YT	0	FALSE	0	0.99	FALSE	1
1162	650.297	11.3	CRH1-N177YT		1	FHNYTLDWAMDK	FHNYTLDWAMDK[1162]	2	y	1	5	11.3	CRH1-N177YT	0	FALSE	0	0.99	FALSE	1
1187	650.297	11.3	CRH1-N177YT		1	FHNYTLDWAMDK	FHNYTLDWAMDK[1187]	2	y	1	5	11.3	CRH1-N177YT	0	FALSE	0	0.99	FALSE	1
1212	650.297	11.3	CRH1-N177YT		1	FHNYTLDWAMDK	FHNYTLDWAMDK[1212]	2	y	1	5	11.3	CRH1-N177YT	0	FALSE	0	0.99	FALSE	1
1237	650.297	11.3	CRH1-N177YT		1	FHNYTLDWAMDK	FHNYTLDWAMDK[1237]	2	y	1	5	11.3	CRH1-N177YT	0	FALSE	0	0.99	FALSE	1
412.5	325.652	11.3	CRH1-N177YT		1	FHNYTLDWAMDK	FHNYTLDWAMDK[412]	2	y	2	5	11.3	CRH1-N177YT	0	FALSE	0	0.99	FALSE	1
437	325.652	11.3	CRH1-N177YT		1	FHNYTLDWAMDK	FHNYTLDWAMDK[437]	2	y	2	5	11.3	CRH1-N177YT	0	FALSE	0	0.99	FALSE	1
462	325.652	11.3	CRH1-N177YT		1	FHNYTLDWAMDK	FHNYTLDWAMDK[462]	2	y	2	5	11.3	CRH1-N177YT	0	FALSE	0	0.99	FALSE	1
487	325.652	11.3	CRH1-N177YT		1	FHNYTLDWAMDK	FHNYTLDWAMDK[487]	2	y	2	5	11.3	CRH1-N177YT	0	FALSE	0	0.99	FALSE	1
512	325.652	12.3	CRH1-N177YT		1	FHNYTLDWAMDK	FHNYTLDWAMDK[512]	2	y	2	5	12.3	CRH1-N177YT	0	FALSE	0	0.99	FALSE	1
537	325.652	11.3	CRH1-N177YT		1	FHNYTLDWAMDK	FHNYTLDWAMDK[537]	2	y	2	5	11.3	CRH1-N177YT	0	FALSE	0	0.99	FALSE	1
562	325.652	11.3	CRH1-N177YT		1	FHNYTLDWAMDK	FHNYTLDWAMDK[562]	2	y	2	5	11.3	CRH1-N177YT	0	FALSE	0	0.99	FALSE	1
587	325.652	11.3	CRH1-N177YT		1	FHNYTLDWAMDK	FHNYTLDWAMDK[587]	2	y	2	5	11.3	CRH1-N177YT	0	FALSE	0	0.99	FALSE	1
612	325.652	11.3	CRH1-N177YT		1	FHNYTLDWAMDK	FHNYTLDWAMDK[612]	2	y	2	5	11.3	CRH1-N177YT	0	FALSE	0	0.99	FALSE	1
637	325.652	11.3	CRH1-N177YT		1	FHNYTLDWAMDK	FHNYTLDWAMDK[637]	2	y	2	5	11.3	CRH1-N177YT	0	FALSE	0	0.99	FALSE	1
662	325.652	11.3	CRH1-N177YT		1	FHNYTLDWAMDK	FHNYTLDWAMDK[662]	2	y	2	5	11.3	CRH1-N177YT	0	FALSE	0	0.99	FALSE	1
687	325.652	11.3	CRH1-N177YT		1	FHNYTLDWAMDK	FHNYTLDWAMDK[687]	2	y	2	5	11.3	CRH1-N177YT	0	FALSE	0	0.99	FALSE	1
712	325.652	11.3	CRH1-N177YT		1	FHNYTLDWAMDK	FHNYTLDWAMDK[712]	2	y	2	5	11.3	CRH1-N177YT	0	FALSE	0	0.99	FALSE	1
737	325.652	11.3	CRH1-N177YT		1	FHNYTLDWAMDK	FHNYTLDWAMDK[737]	2	y	2	5	11.3	CRH1-N177YT	0	FALSE	0	0.99	FALSE	1
762	325.652	11.3	CRH1-N177YT		1	FHNYTLDWAMDK	FHNYTLDWAMDK[762]	2	y	2	5	11.3	CRH1-N177YT	0	FALSE	0	0.99	FALSE	1
787	325.652	11.3	CRH1-N177YT		1	FHNYTLDWAMDK	FHNYTLDWAMDK[787]	2	y	2	5	11.3	CRH1-N177YT	0	FALSE	0	0.99	FALSE	1
812	325.652	11.3	CRH1-N177YT		1	FHNYTLDWAMDK	FHNYTLDWAMDK[812]	2	y	2	5	11.3	CRH1-N177YT	0	FALSE	0	0.99	FALSE	1
837	325.652	11.3	CRH1-N177YT		1	FHNYTLDWAMDK	FHNYTLDWAMDK[837]	2	y	2	5	11.3	CRH1-N177YT	0	FALSE	0	0.99	FALSE	1
862	325.652	11.3	CRH1-N177YT		1	FHNYTLDWAMDK	FHNYTLDWAMDK[862]	2	y	2	5	11.3	CRH1-N177YT	0	FALSE	0	0.99	FALSE	1
887	325.652	11.3	CRH1-N177YT		1	FHNYTLDWAMDK	FHNYTLDWAMDK[887]	2	y	2	5	11.3	CRH1-N177YT	0	FALSE	0	0.99	FALSE	1
912	325.652	11.3	CRH1-N177YT		1	FHNYTLDWAMDK	FHNYTLDWAMDK[912]	2	y	2	5	11.3	CRH1-N177YT	0	FALSE	0	0.99	FALSE	1
937	325.652	11.3	CRH1-N177YT		1	FHNYTLDWAMDK	FHNYTLDWAMDK[937]	2	y	2	5	11.3	CRH1-N177YT	0	FALSE	0	0.99	FALSE	1
962	325.652	11.3	CRH1-N177YT		1	FHNYTLDWAMDK	FHNYTLDWAMDK[962]	2	y	2	5	11.3	CRH1-N177YT	0	FALSE	0	0.99	FALSE	1
987	325.652	11.3	CRH1-N177YT		1	FHNYTLDWAMDK	FHNYTLDWAMDK[987]	2	y	2	5	11.3	CRH1-N177YT	0	FALSE	0	0.99	FALSE	1
1012	325.652	11.3	CRH1-N177YT		1	FHNYTLDWAMDK	FHNYTLDWAMDK[1012]	2	y	2	5	11.3	CRH1-N177YT	0	FALSE	0	0.99	FALSE	1
1037	325.652	11.3	CRH1-N177YT		1	FHNYTLDWAMDK	FHNYTLDWAMDK[1037]	2	y	2	5	11.3	CRH1-N177YT	0	FALSE	0	0.99	FALSE	1
1062	325.652	11.3	CRH1-N177YT		1	FHNYTLDWAMDK	FHNYTLDWAMDK[1062]	2	y	2	5	11.3	CRH1-N177YT	0	FALSE	0	0.99	FALSE	1
1087	325.652	11.3	CRH1-N177YT		1	FHNYTLDWAMDK	FHNYTLDWAMDK[1087]	2	y	2	5	11.3	CRH1-N177YT	0	FALSE	0	0.99	FALSE	1
1112	325.652	11.3	CRH1-N177YT		1	FHNYTLDWAMDK	FHNYTLDWAMDK[1112]	2	y	2	5	11.3	CRH1-N177YT	0	FALSE	0	0.99	FALSE	1
1137	325.652	11.3	CRH1-N177YT		1	FHNYTLDWAMDK	FHNYTLDWAMDK[1137]	2	y	2	5	11.3	CRH1-N177YT	0	FALSE	0	0.99	FALSE	1
1162	325.652	11.3	CRH1-N177YT		1	FHNYTLDWAMDK	FHNYTLDWAMDK[1162]	2	y	2	5	11.3	CRH1-N177YT	0	FALSE	0	0.99	FALSE	1
1187	325.652	11.3	CRH1-N177YT		1	FHNYTLDWAMDK	FHNYTLDWAMDK[1187]	2	y	2	5	11.3	CRH1-N177YT	0	FALSE	0	0.99	FALSE	1
1212	325.652	11.3	CRH1-N177YT		1	FHNYTLDWAMDK	FHNYTLDWAMDK[1212]	2	y	2	5	11.3	CRH1-N177YT	0	FALSE	0	0.99	FALSE	1
1237	325.652	11.3	CRH1-N177YT		1	FHNYTLDWAMDK	FHNYTLDWAMDK[1237]	2	y	2	5	11.3	CRH1-N177YT	0	FALSE	0	0.99	FALSE	1
412.5	765.324	11.3	CRH1-N177YT		1	FHNYTLDWAMDK	FHNYTLDWAMDK[412]	2	y	1	6	11.3	CRH1-N177YT	0	FALSE	0	0.99	FALSE	1
437	765.324	11.3	CRH1-N177YT		1	FHNYTLDWAMDK	FHNYTLDWAMDK[437]	2	y	1	6	11.3	CRH1-N177YT	0	FALSE	0	0.99	FALSE	1
462	765.324	11.3	CRH1-N177YT		1	FHNYTLDWAMDK	FHNYTLDWAMDK[462]	2	y	1	6	11.3	CRH1-N177YT	0	FALSE	0	0.99	FALSE	1
487	765.324	11.3	CRH1-N177YT		1	FHNYTLDWAMDK	FHNYTLDWAMDK[487]	2	y	1	6	11.3	CRH1-N177YT	0	FALSE	0	0.99	FALSE	1
512	765.324	12.3	CRH1-N177YT		1	FHNYTLDWAMDK	FHNYTLDWAMDK[512]	2	y	1	6	12.3	CRH1-N177YT	0	FALSE	0	0.99	FALSE	1
537	765.324	11.3	CRH1-N177YT		1	FHNYTLDWAMDK	FHNYTLDWAMDK[537]	2	y	1	6	11.3	CRH1-N177YT	0	FALSE	0	0.99	FALSE	1
562	765.324	11.3	CRH1-N177YT		1	FHNYTLDWAMDK	FHNYTLDWAMDK[562]	2	y	1	6	11.3	CRH1-N177YT	0	FALSE	0	0.99	FALSE	1
587	765.324	11.3	CRH1-N177YT		1	FHNYTLDWAMDK	FHNYTLDWAMDK[587]	2	y	1	6	11.3	CRH1-N177YT	0	FALSE	0	0.99	FALSE	1
612	765.324	11.3	CRH1-N177YT		1	FHNYTLDWAMDK	FHNYTLDWAMDK[612]	2	y	1	6	11.3	CRH1-N177YT	0	FALSE	0	0.99	FALSE	1
637	765.324	11.3	CRH1-N177YT		1	FHNYTLDWAMDK	FHNYTLDWAMDK[637]	2	y	1	6	11.3	CRH1-N177YT	0	FALSE	0	0.99	FALSE	1
662	765.324	11.3	CRH1-N177YT		1	FHNYTLDWAMDK	FHNYTLDWAMDK[662]	2	y	1	6	11.3	CRH1-N177YT	0	FALSE	0	0.99	FALSE	1
687	765.324	11.3	CRH1-N177YT		1	FHNYTLDWAMDK	FHNYTLDWAMDK[687]	2	y	1	6	11.3	CRH1-N177YT	0	FALSE	0	0.99	FALSE	1
712	765.324	11.3	CRH1-N177YT		1	FHNYTLDWAMDK	FHNYTLDWAMDK[712]	2	y	1	6	11.3	CRH1-N177YT	0	FALSE	0	0.99	FALSE	1
737	765.324	11.3	CRH1-N177YT		1	FHNYTLDWAMDK	FHNYTLDWAMDK[737]	2	y	1	6	11.3	CRH1-N177YT	0	FALSE	0	0.99	FALSE	1
762	765.324	11.3	CRH1-N177YT		1	FHNYTLDWAMDK	FHNYTLDWAMDK[762]	2	y	1	6	11.3	CRH1-N177YT	0	FALSE	0	0.99	FALSE	1
787	765.324	11.3	CRH1-N177YT		1	FHNYTLDWAMDK	FHNYTLDWAMDK[787]	2	y	1	6	11.3	CRH1-N177YT	0	FALSE	0	0.99	FALSE	1
812	765.324	11.3	CRH1-N177YT		1	FHNYTLDWAMDK	FHNYTLDWAMDK[812]	2	y	1	6	11.3	CRH1-N177YT	0	FALSE	0	0.99	FALSE	1
837	765.324	11.3	CRH1-N177YT		1	FHNYTLDWAMDK	FHNYTLDWAMDK[837]	2	y	1	6	11.3	CRH1-N177YT	0	FALSE	0	0.99	FALSE	1
862	765.324	11.3	CRH1-N177YT		1	FHNYTLDWAMDK	FHNYTLDWAMDK[862]	2	y	1	6	11.3	CRH1-N177YT	0	FALSE	0	0.99	FALSE	1
887	765.324	11.3	CRH1-N177YT		1	FHNYTLDWAMDK	FHNYTLDWAMDK[887]	2	y	1	6	11.3	CRH1-N177YT	0	FALSE	0	0.99	FALSE	1
912	765.324	11.3	CRH1-N177YT		1	FHNYTLDWAMDK	FHNYTLDWAMDK[912]	2	y	1	6	11.3	CRH1-N177YT	0	FALSE	0	0.99	FALSE	1
937	765.324	11.3	CRH1-N177YT		1	FHNYTLDWAMDK	FHNYTLDWAMDK[937]	2	y	1	6	11.3	CRH1-N177YT	0	FALSE	0	0.99	FALSE	1
962	765.324	11.3	CRH1-N177YT		1	FHNYTLDWAMDK	FHNYTLDWAMDK[962]	2	y	1	6	11.3	CRH1-N177YT	0	FALSE	0	0.99	FALSE	1
987	765.324	11.3	CRH1-N177YT		1	FHNYTLDWAMDK	FHNYTLDWAMDK[987]	2	y	1	6	11.3	CRH1-N177YT	0	FALSE	0	0.99	FALSE	1
1012	765.324	11.3	CRH1-N177YT		1	FHNYTLDWAMDK	FHNYTLDWAMDK[1012]	2	y	1	6	11.3	CRH1-N177YT	0	FALSE	0	0.99	FALSE	1
1037	765.324	11.3	CRH1-N177YT		1	FHNYTLDWAMDK	FHNYTLDWAMDK[1037]	2	y	1	6	11.3	CRH1-N177YT	0	FALSE	0	0.99	FALSE	1
1062	765.324	11.3	CRH1-N177YT		1	FHNYTLDWAMDK	FHNYTLDWAMDK[1062]	2	y	1	6	11.3	CRH1-N177YT	0	FALSE	0	0.99	FALSE	1
1087	765.324	11.3	CRH1-N177YT		1	FHNYTLDWAMDK	FHNYTLDWAMDK[1087]	2	y	1	6	11.3	CRH1-N177YT	0	FALSE	0	0.99	FALSE	1
1112	765.324	11.3	CRH1-N177YT		1	FHNYTLDWAMDK	FHNYTLDWAMDK[1112]	2	y	1	6	11.3	CRH1-N177YT	0	FALSE	0	0.99	FALSE	1
1137	765.324	11.3	CRH1-N177YT		1	FHNYTLDWAMDK	FHNYTLDWAMDK[1137]	2	y	1	6	11.3	CRH1-N177YT	0	FALSE	0	0.99	FALSE	1
1162	765.324	11.3	CRH1-N177YT		1	FHNYTLDWAMDK	FHNYTLDWAMDK[1162]	2	y	1	6	11.3	CRH1-N177YT	0	FALSE	0	0.99	FALSE	1
1187	765.324	11.3	CRH1-N177YT		1	FHNYTLDWAMDK	FHNYTLDWAMDK[1187]	2	y	1	6	11.3	CRH1-N177YT	0	FALSE	0	0.99	FALSE	1
1212	765.324	11.3	CRH1-N177YT		1	FHNYTLDWAMDK	FHNYTLDWAMDK[1212]	2	y	1	6	11.3	CRH1-N177YT	0	FALSE	0	0.99	FALSE	1
1237	765.324	11.3	CRH1-N177YT		1	FHNYTLDWAMDK	FHNYTLDWAMDK[1237]	2	y	1	6	11.3	CRH1-N177YT	0	FALSE	0	0.99	FALSE	1
412.5	383.165	11.3	CRH1-N177YT		1	FHNYTLDWAMDK	FHNYTLDWAMDK[412]	2	y	2	6	11.3	CRH1-N177YT	0	FALSE	0	0.99	FALSE	1
437	383.165	11.3	CRH1-N177YT		1	FHNYTLDWAMDK	FHNYTLDWAMDK[437]	2	y	2	6	11.3	CRH1-N177YT	0	FALSE	0	0.99	FALSE	1
462	383.165	11.3	CRH1-N177YT		1	FHNYTLDWAMDK	FHNYTLDWAMDK[462]	2	y	2	6	11.3	CRH1-N177YT	0	FALSE	0	0.99	FALSE	1
487	383.165	11.3	CRH1-N177YT		1	FHNYTLDWAMDK	FHNYTLDWAMDK[487]	2	y	2	6	11.3	CRH1-N177YT	0	FALSE	0	0.99	FALSE	1
512	383.165	12.3	CRH1-N177YT		1	FHNYTLDWAMDK	FHNYTLDWAMDK[512]	2	y	2	6	12.3	CRH1-N177YT	0	FALSE	0	0.99	FALSE	1
537	383.165	11.3	CRH1-N177YT		1	FHNYTLDWAMDK	FHNYTLDWAMDK[537]	2	y	2	6	11.3	CRH1-N177YT	0	FALSE	0	0.99	FALSE	1
562	383.165	11.3	CRH1-N177YT		1	FHNYTLDWAMDK	FHNYTLDWAMDK[562]	2	y	2	6	11.3	CRH1-N177YT	0	FALSE	0	0.99	FALSE	1
587	383.165	11.3	CRH1-N177YT		1	FHNYTLDWAMDK	FHNYTLDWAMDK[587]	2	y	2	6	11.3	CRH1-N177YT	0	FALSE	0	0.99	FALSE	1
612	383.165	11.3	CRH1-N177YT		1	FHNYTLDWAMDK	FHNYTLDWAMDK[612]	2	y	2	6	11.3	CRH1-N177YT	0	FALSE	0	0.99	FALSE	1
637	383.165	11.3	CRH1-N177YT		1	FHNYTLDWAMDK	FHNYTLDWAMDK[637]	2	y	2	6	11.3	CRH1-N177YT	0	FALSE	0	0.99	FALSE	1
662	383.165	11.3	CRH1-N177YT		1	FHNYTLDWAMDK	FHNYTLDWAMDK[662]	2	y	2	6	11.3	CRH1-N177YT	0	FALSE	0	0.99	FALSE	1
687	383.165	11.3	CRH1-N177YT		1	FHNYTLDWAMDK	FHNYTLDWAMDK[687]	2	y	2	6	11.3	CRH1-N177YT	0	FALSE	0	0.99	FALSE	1
712	383.165	11.3	CRH1-N177YT		1	FHNYTLDWAMDK	FHNYTLDWAMDK[712]	2	y	2	6	11.3	CRH1-N177YT	0	FALSE	0	0.99	FALSE	1
737	383.165	11.3	CRH1-N177YT		1	FHNYTLDWAMDK	FHNYTLDWAMDK[737]	2	y	2	6	11.3	CRH1-N177YT	0	FALSE	0	0.99	FALSE	1
762	383.165	11.3	CRH1-N177YT		1	FHNYTLDWAMDK	FHNYTLDWAMDK[762]	2	y	2	6	11.3	CRH1-N177YT	0	FALSE	0	0.99	FALSE	1
787	383.165	11.3	CRH1-N177YT		1	FHNYTLDWAMDK	FHNYTLDWAMDK[787]	2	y	2	6	11.3	CRH1-N177YT	0	FALSE	0	0.99	FALSE	1
812	383.165	11.3	CRH1-N177YT		1	FHNYTLDWAMDK	FHNYTLDWAMDK[812]	2	y	2	6	11.3	CRH1-N177YT	0	FALSE	0	0.99	FALSE	1
837	383.165	11.3	CRH1-N177YT		1	FHNYTLDWAMDK	FHNYTLDWAMDK[837]	2	y	2	6	11.3	CRH1-N177YT	0	FALSE	0	0.99	FALSE	1
862	383.165	11.3	CRH1-N177YT		1	FHNYTLDWAMDK	FHNYTLDWAMDK[862]	2	y	2	6	11.3	CRH1-N177YT	0	FALSE	0	0.99	FALSE	1
887	383.165	11.3	CRH1-N177YT		1	FHNYTLDWAMDK	FHNYTLDWAMDK[887]	2	y	2	6	11.3	CRH1-N177YT	0	FALSE	0	0.99	FALSE	1
912	383.165	11.3	CRH1-N177YT		1	FHNYTLDWAMDK	FHNYTLDWAMDK[912]	2	y	2	6	11.3	CRH1-N177YT	0	FALSE	0	0.99	FALSE	1
937	383.165	11.3	CRH1-N177YT		1	FHNYTLDWAMDK	FHNYTLDWAMDK[937]	2	y	2	6	11.3	CRH1-N177YT	0	FALSE	0	0.99	FALSE	1
962	383.165	11.3	CRH1-N177YT		1	FHNYTLDWAMDK	FHNYTLDWAMDK[962]	2	y	2	6	11.3	CRH1-N177YT	0	FALSE	0	0.99	FALSE	1
987	383.165	11.3	CRH1-N177YT		1	FHNYTLDWAMDK	FHNYTLDWAMDK[987]	2	y	2	6	11.3	CRH1-N177YT	0	FALSE	0	0.99	FALSE	1
1012	383.165	11.3	CRH1-N177YT		1	FHNYTLDWAMDK	FHNYTLDWAMDK[1012]	2	y	2	6	11.3	CRH1-N177YT	0	FALSE	0	0.99	FALSE	1
1037	383.165	11.3	CRH1-N177YT		1	FHNYTLDWAMDK	FHNYTLDWAMDK[1037]	2	y	2	6	11.3	CRH1-N177YT	0	FALSE	0	0.99	FALSE	1
1062	383.165	11.3	CRH1-N177YT		1	FHNYTLDWAMDK	FHNYTLDWAMDK[1062]	2	y	2	6	11.3	CRH1-N177YT	0	FALSE	0	0.99	FALSE	1
1087	383.165	11.3	CRH1-N177YT		1	FHNYTLDWAMDK	FHNYTLDWAMDK[1087]	2	y	2	6	11.3	CRH1-N177YT	0	FALSE	0	0.99	FALSE	1
1112	383.165	11.3	CRH1-N177YT		1	FHNYTLDWAMDK	FHNYTLDWAMDK[1112]	2	y	2	6	11.3	CRH1-N177YT	0	FALSE	0	0.99	FALSE	1
1137	383.165	11.3	CRH1-N177YT		1	FHNYTLDWAMDK	FHNYTLDWAMDK[1137]	2	y	2	6	11.3	CRH1-N177YT	0	FALSE	0	0.99	FALSE	1
1162	383.165	11.3	CRH1-N177YT		1	FHNYTLDWAMDK	FHNYTLDWAMDK[1162]	2	y	2	6	11.3	CRH1-N177YT	0	FALSE	0	0.99	FALSE	1
1187	383.165	11.3	CRH1-N177YT		1	FHNYTLDWAMDK	FHNYTLDWAMDK[1187]	2	y	2	6	11.3	CRH1-N177YT	0	FALSE	0	0.99	FALSE	1
1212	383.165	11.3	CRH1-N177YT		1	FHNYTLDWAMDK	FHNYTLDWAMDK[1212]	2	y	2	6	11.3	CRH1-N177YT	0	FALSE	0	0.99	FALSE	1
1237	383.165	11.3	CRH1-N177YT		1	FHNYTLDWAMDK	FHNYTLDWAMDK[1237]	2	y	2	6	11.3	CRH1-N177YT	0	FALSE	0	0.99	FALSE	1
412.5	878.408	11.3	CRH1-N177YT		1	FHNYTLDWAMDK	FHNYTLDWAMDK[412]	2	y	1	7	11.3	CRH1-N177YT	0	FALSE	0	0.99	FALSE	1
437	878.408	11.3	CRH1-N177YT		1	FHNYTLDWAMDK	FHNYTLDWAMDK[437]	2	y	1	7	11.3	CRH1-N177YT	0	FALSE	0	0.99	FALSE	1
462	878.408	11.3	CRH1-N177YT		1	FHNYTLDWAMDK	FHNYTLDWAMDK[462]	2	y	1	7	11.3	CRH1-N177YT	0	FALSE	0	0.99	FALSE	1
487	878.408	11.3	CRH1-N177YT		1	FHNYTLDWAMDK	FHNYTLDWAMDK[487]	2	y	1	7	11.3	CRH1-N177YT	0	FALSE	0	0.99	FALSE	1
512	878.408	12.3	CRH1-N177YT		1	FHNYTLDWAMDK	FHNYTLDWAMDK[512]	2	y	1	7	12.3	CRH1-N177YT	0	FALSE	0	0.99	FALSE	1
537	878.408	11.3	CRH1-N177YT		1	FHNYTLDWAMDK	FHNYTLDWAMDK[537]	2	y	1	7	11.3	CRH1-N177YT	0	FALSE	0	0.99	FALSE	1
562	878.408	11.3	CRH1-N177YT		1	FHNYTLDWAMDK	FHNYTLDWAMDK[562]	2	y	1	7	11.3	CRH1-N177YT	0	FALSE	0	0.99	FALSE	1
587	878.408	11.3	CRH1-N177YT		1	FHNYTLDWAMDK	FHNYTLDWAMDK[587]	2	y	1	7	11.3	CRH1-N177YT	0	FALSE	0	0.99	FALSE	1
612	878.408	11.3	CRH1-N177YT		1	FHNYTLDWAMDK	FHNYTLDWAMDK[612]	2	y	1	7	11.3	CRH1-N177YT	0	FALSE	0	0.99	FALSE	1
637	878.408	11.3	CRH1-N177YT		1	FHNYTLDWAMDK	FHNYTLDWAMDK[637]	2	y	1	7	11.3	CRH1-N177YT	0	FALSE	0	0.99	FALSE	1
662	878.408	11.3	CRH1-N177YT		1	FHNYTLDWAMDK	FHNYTLDWAMDK[662]	2	y	1	7	11.3	CRH1-N177YT	0	FALSE	0	0.99	FALSE	1
687	878.408	11.3	CRH1-N177YT		1	FHNYTLDWAMDK	FHNYTLDWAMDK[687]	2	y	1	7	11.3	CRH1-N177YT	0	FALSE	0	0.99	FALSE	1
712	878.408	11.3	CRH1-N177YT		1	FHNYTLDWAMDK	FHNYTLDWAMDK[712]	2	y	1	7	11.3	CRH1-N177YT	0	FALSE	0	0.99	FALSE	1
737	878.408	11.3	CRH1-N177YT		1	FHNYTLDWAMDK	FHNYTLDWAMDK[737]	2	y	1	7	11.3	CRH1-N177YT	0	FALSE	0	0.99	FALSE	1
762	878.408	11.3	CRH1-N177YT		1	FHNYTLDWAMDK	FHNYTLDWAMDK[762]	2	y	1	7	11.3	CRH1-N177YT	0	FALSE	0	0.99	FALSE	1
787	878.408	11.3	CRH1-N177YT		1	FHNYTLDWAMDK	FHNYTLDWAMDK[787]	2	y	1	7	11.3	CRH1-N177YT	0	FALSE	0	0.99	FALSE	1
812	878.408	11.3	CRH1-N177YT		1	FHNYTLDWAMDK	FHNYTLDWAMDK[812]	2	y	1	7	11.3	CRH1-N177YT	0	FALSE	0	0.99	FALSE	1
837	878.408	11.3	CRH1-N177YT		1	FHNYTLDWAMDK	FHNYTLDWAMDK[837]	2	y	1	7	11.3	CRH1-N177YT	0	FALSE	0	0.99	FALSE	1
862	878.408	11.3	CRH1-N177YT		1	FHNYTLDWAMDK	FHNYTLDWAMDK[862]	2	y	1	7	11.3	CRH1-N177YT	0	FALSE	0	0.99	FALSE	1
887	878.408	11.3	CRH1-N177YT		1	FHNYTLDWAMDK	FHNYTLDWAMDK[887]	2	y	1	7	11.3	CRH1-N177YT	0	FALSE	0	0.99	FALSE	1
912	878.408	11.3	CRH1-N177YT		1	FHNYTLDWAMDK	FHNYTLDWAMDK[912]	2	y	1	7	11.3	CRH1-N177YT	0	FALSE	0	0.99	FALSE	1
937	878.408	11.3	CRH1-N177YT		1	FHNYTLDWAMDK	FHNYTLDWAMDK[937]	2	y	1	7	11.3	CRH1-N177YT	0	FALSE	0	0.99	FALSE	1
962	878.408	11.3	CRH1-N177YT		1	FHNYTLDWAMDK	FHNYTLDWAMDK[962]	2	y	1	7	11.3	CRH1-N177YT	0	FALSE	0	0.99	FALSE	1
987	878.408	11.3	CRH1-N177YT		1	FHNYTLDWAMDK	FHNYTLDWAMDK[987]	2	y	1	7	11.3	CRH1-N177YT	0	FALSE	0	0.99	FALSE	1
1012	878.408	11.3	CRH1-N177YT		1	FHNYTLDWAMDK	FHNYTLDWAMDK[1012]	2	y	1	7	11.3	CRH1-N177YT	0	FALSE	0	0.99	FALSE	1
1037	878.408	11.3	CRH1-N177YT		1	FHNYTLDWAMDK	FHNYTLDWAMDK[1037]	2	y	1	7	11.3	CRH1-N177YT	0	FALSE	0	0.99	FALSE	1
1062	878.408	11.3	CRH1-N177YT		1	FHNYTLDWAMDK	FHNYTLDWAMDK[1062]	2	y	1	7	11.3	CRH1-N177YT	0	FALSE	0	0.99	FALSE	1
1087	878.408	11.3	CRH1-N177YT		1	FHNYTLDWAMDK	FHNYTLDWAMDK[1087]	2	y	1	7	11.3	CRH1-N177YT	0	FALSE	0	0.99	FALSE	1
1112	878.408	11.3	CRH1-N177YT		1	FHNYTLDWAMDK	FHNYTLDWAMDK[1112]	2	y	1	7	11.3	CRH1-N177YT	0	FALSE	0	0.99	FALSE	1
1137	878.408	11.3	CRH1-N177YT		1	FHNYTLDWAMDK	FHNYTLDWAMDK[1137]	2	y	1	7	11.3	CRH1-N177YT	0	FALSE	0	0.99	FALSE	1
1162	878.408	11.3	CRH1-N177YT		1	FHNYTLDWAMDK	FHNYTLDWAMDK[1162]	2	y	1	7	11.3	CRH1-N177YT	0	FALSE	0	0.99	FALSE	1
1187	878.408	11.3	CRH1-N177YT		1	FHNYTLDWAMDK	FHNYTLDWAMDK[1187]	2	y	1	7	11.3	CRH1-N177YT	0	FALSE	0	0.99	FALSE	1
1212	878.408	11.3	CRH1-N177YT		1	FHNYTLDWAMDK	FHNYTLDWAMDK[1212]	2	y	1	7	11.3	CRH1-N177YT	0	FALSE	0	0.99	FALSE	1
1237	878.408	11.3	CRH1-N177YT		1	FHNYTLDWAMDK	FHNYTLDWAMDK[1237]	2	y	1	7	11.3	CRH1-N177YT	0	FALSE	0	0.99	FALSE	1
412.5	439.707	11.3	CRH1-N177YT		1	FHNYTLDWAMDK	FHNYTLDWAMDK[412]	2	y	2	7	11.3	CRH1-N177YT	0	FALSE	0	0.99	FALSE	1
437	439.707	11.3	CRH1-N177YT		1	FHNYTLDWAMDK	FHNYTLDWAMDK[437]	2	y	2	7	11.3	CRH1-N177YT	0	FALSE	0	0.99	FALSE	1
462	439.707	11.3	CRH1-N177YT		1	FHNYTLDWAMDK	FHNYTLDWAMDK[462]	2	y	2	7	11.3	CRH1-N177YT	0	FALSE	0	0.99	FALSE	1
487	439.707	11.3	CRH1-N177YT		1	FHNYTLDWAMDK	FHNYTLDWAMDK[487]	2	y	2	7	11.3	CRH1-N177YT	0	FALSE	0	0.99	FALSE	1
512	439.707	12.3	CRH1-N177YT		1	FHNYTLDWAMDK	FHNYTLDWAMDK[512]	2	y	2	7	12.3	CRH1-N177YT	0	FALSE	0	0.99	FALSE	1
537	439.707	11.3	CRH1-N177YT		1	FHNYTLDWAMDK	FHNYTLDWAMDK[537]	2	y	2	7	11.3	CRH1-N177YT	0	FALSE	0	0.99	FALSE	1
562	439.707	11.3	CRH1-N177YT		1	FHNYTLDWAMDK	FHNYTLDWAMDK[562]	2	y	2	7	11.3	CRH1-N177YT	0	FALSE	0	0.99	FALSE	1
587	439.707	11.3	CRH1-N177YT		1	FHNYTLDWAMDK	FHNYTLDWAMDK[587]	2	y	2	7	11.3	CRH1-N177YT	0	FALSE	0	0.99	FALSE	1
612	439.707	11.3	CRH1-N177YT		1	FHNYTLDWAMDK	FHNYTLDWAMDK[612]	2	y	2	7	11.3	CRH1-N177YT	0	FALSE	0	0.99	FALSE	1
637	439.707	11.3	CRH1-N177YT		1	FHNYTLDWAMDK	FHNYTLDWAMDK[637]	2	y	2	7	11.3	CRH1-N177YT	0	FALSE	0	0.99	FALSE	1
662	439.707	11.3	CRH1-N177YT		1	FHNYTLDWAMDK	FHNYTLDWAMDK[662]	2	y	2	7	11.3	CRH1-N177YT	0	FALSE	0	0.99	FALSE	1
687	439.707	11.3	CRH1-N177YT		1	FHNYTLDWAMDK	FHNYTLDWAMDK[687]	2	y	2	7	11.3	CRH1-N177YT	0	FALSE	0	0.99	FALSE	1
712	439.707	11.3	CRH1-N177YT		1	FHNYTLDWAMDK	FHNYTLDWAMDK[712]	2	y	2	7	11.3	CRH1-N177YT	0	FALSE	0	0.99	FALSE	1
737	439.707	11.3	CRH1-N177YT		1	FHNYTLDWAMDK	FHNYTLDWAMDK[737]	2	y	2	7	11.3	CRH1-N177YT	0	FALSE	0	0.99	FALSE	1
762	439.707	11.3	CRH1-N177YT		1	FHNYTLDWAMDK	FHNYTLDWAMDK[762]	2	y	2	7	11.3	CRH1-N177YT	0	FALSE	0	0.99	FALSE	1
787	439.707	11.3	CRH1-N177YT		1	FHNYTLDWAMDK	FHNYTLDWAMDK[787]	2	y	2	7	11.3	CRH1-N177YT	0	FALSE	0	0.99	FALSE	1
812	439.707	11.3	CRH1-N177YT		1	FHNYTLDWAMDK	FHNYTLDWAMDK[812]	2	y	2	7	11.3	CRH1-N177YT	0	FALSE	0	0.99	FALSE	1
837	439.707	11.3	CRH1-N177YT		1	FHNYTLDWAMDK	FHNYTLDWAMDK[837]	2	y	2	7	11.3	CRH1-N177YT	0	FALSE	0	0.99	FALSE	1
862	439.707	11.3	CRH1-N177YT		1	FHNYTLDWAMDK	FHNYTLDWAMDK[862]	2	y	2	7	11.3	CRH1-N177YT	0	FALSE	0	0.99	FALSE	1
887	439.707	11.3	CRH1-N177YT		1	FHNYTLDWAMDK	FHNYTLDWAMDK[887]	2	y	2	7	11.3	CRH1-N177YT	0	FALSE	0	0.99	FALSE	1
912	439.707	11.3	CRH1-N177YT		1	FHNYTLDWAMDK	FHNYTLDWAMDK[912]	2	y	2	7	11.3	CRH1-N177YT	0	FALSE	0	0.99	FALSE	1
937	439.707	11.3	CRH1-N177YT		1	FHNYTLDWAMDK	FHNYTLDWAMDK[937]	2	y	2	7	11.3	CRH1-N177YT	0	FALSE	0	0.99	FALSE	1
962	439.707	11.3	CRH1-N177YT		1	FHNYTLDWAMDK	FHNYTLDWAMDK[962]	2	y	2	7	11.3	CRH1-N177YT	0	FALSE	0	0.99	FALSE	1
987	439.707	11.3	CRH1-N177YT		1	FHNYTLDWAMDK	FHNYTLDWAMDK[987]	2	y	2	7	11.3	CRH1-N177YT	0	FALSE	0	0.99	FALSE	1
1012	439.707	11.3	CRH1-N177YT		1	FHNYTLDWAMDK	FHNYTLDWAMDK[1012]	2	y	2	7	11.3	CRH1-N177YT	0	FALSE	0	0.99	FALSE	1
1037	439.707	11.3	CRH1-N177YT		1	FHNYTLDWAMDK	FHNYTLDWAMDK[1037]	2	y	2	7	11.3	CRH1-N177YT	0	FALSE	0	0.99	FALSE	1
1062	439.707	11.3	CRH1-N177YT		1	FHNYTLDWAMDK	FHNYTLDWAMDK[1062]	2	y	2	7	11.3	CRH1-N177YT	0	FALSE	0	0.99	FALSE	1
1087	439.707	11.3	CRH1-N177YT		1	FHNYTLDWAMDK	FHNYTLDWAMDK[1087]	2	y	2	7	11.3	CRH1-N177YT	0	FALSE	0	0.99	FALSE	1
1112	439.707	11.3	CRH1-N177YT		1	FHNYTLDWAMDK	FHNYTLDWAMDK[1112]	2	y	2	7	11.3	CRH1-N177YT	0	FALSE	0	0.99	FALSE	1
1137	439.707	11.3	CRH1-N177YT		1	FHNYTLDWAMDK	FHNYTLDWAMDK[1137]	2	y	2	7	11.3	CRH1-N177YT	0	FALSE	0	0.99	FALSE	1
1162	439.707	11.3	CRH1-N177YT		1	FHNYTLDWAMDK	FHNYTLDWAMDK[1162]	2	y	2	7	11.3	CRH1-N177YT	0	FALSE	0	0.99	FALSE	1
1187	439.707	11.3	CRH1-N177YT		1	FHNYTLDWAMDK	FHNYTLDWAMDK[1187]	2	y	2	7	11.3	CRH1-N177YT	0	FALSE	0	0.99	FALSE	1
1212	439.707	11.3	CRH1-N177YT		1	FHNYTLDWAMDK	FHNYTLDWAMDK[1212]	2	y	2	7	11.3	CRH1-N177YT	0	FALSE	0	0.99	FALSE	1
1237	439.707	11.3	CRH1-N177YT		1	FHNYTLDWAMDK	FHNYTLDWAMDK[1237]	2	y	2	7	11.3	CRH1-N177YT	0	FALSE	0	0.99	FALSE	1
412.5	979.455	11.3	CRH1-N177YT		1	FHNYTLDWAMDK	FHNYTLDWAMDK[412]	2	y	1	8	11.3	CRH1-N177YT	0	FALSE	0	0.99	FALSE	1
437	979.455	11.3	CRH1-N177YT		1	FHNYTLDWAMDK	FHNYTLDWAMDK[437]	2	y	1	8	11.3	CRH1-N177YT	0	FALSE	0	0.99	FALSE	1
462	979.455	11.3	CRH1-N177YT		1	FHNYTLDWAMDK	FHNYTLDWAMDK[462]	2	y	1	8	11.3	CRH1-N177YT	0	FALSE	0	0.99	FALSE	1
487	979.455	11.3	CRH1-N177YT		1	FHNYTLDWAMDK	FHNYTLDWAMDK[487]	2	y	1	8	11.3	CRH1-N177YT	0	FALSE	0	0.99	FALSE	1
512	979.455	12.3	CRH1-N177YT		1	FHNYTLDWAMDK	FHNYTLDWAMDK[512]	2	y	1	8	12.3	CRH1-N177YT	0	FALSE	0	0.99	FALSE	1
537	979.455	11.3	CRH1-N177YT		1	FHNYTLDWAMDK	FHNYTLDWAMDK[537]	2	y	1	8	11.3	CRH1-N177YT	0	FALSE	0	0.99	FALSE	1
562	979.455	11.3	CRH1-N177YT		1	FHNYTLDWAMDK	FHNYTLDWAMDK[562]	2	y	1	8	11.3	CRH1-N177YT	0	FALSE	0	0.99	FALSE	1
587	979.455	11.3	CRH1-N177YT		1	FHNYTLDWAMDK	FHNYTLDWAMDK[587]	2	y	1	8	11.3	CRH1-N177YT	0	FALSE	0	0.99	FALSE	1
612	979.455	11.3	CRH1-N177YT		1	FHNYTLDWAMDK	FHNYTLDWAMDK[612]	2	y	1	8	11.3	CRH1-N177YT	0	FALSE	0	0.99	FALSE	1
637	979.455	11.3	CRH1-N177YT		1	FHNYTLDWAMDK	FHNYTLDWAMDK[637]	2	y	1	8	11.3	CRH1-N177YT	0	FALSE	0	0.99	FALSE	1
662	979.455	11.3	CRH1-N177YT		1	FHNYTLDWAMDK	FHNYTLDWAMDK[662]	2	y	1	8	11.3	CRH1-N177YT	0	FALSE	0	0.99	FALSE	1
687	979.455	11.3	CRH1-N177YT		1	FHNYTLDWAMDK	FHNYTLDWAMDK[687]	2	y	1	8	11.3	CRH1-N177YT	0	FALSE	0	0.99	FALSE	1
712	979.455	11.3	CRH1-N177YT		1	FHNYTLDWAMDK	FHNYTLDWAMDK[712]	2	y	1	8	11.3	CRH1-N177YT	0	FALSE	0	0.99	FALSE	1
737	979.455	11.3	CRH1-N177YT		1	FHNYTLDWAMDK	FHNYTLDWAMDK[737]	2	y	1	8	11.3	CRH1-N177YT	0	FALSE	0	0.99	FALSE	1
762	979.455	11.3	CRH1-N177YT		1	FHNYTLDWAMDK	FHNYTLDWAMDK[762]	2	y	1	8	11.3	CRH1-N177YT	0	FALSE	0	0.99	FALSE	1
787	979.455	11.3	CRH1-N177YT		1	FHNYTLDWAMDK	FHNYTLDWAMDK[787]	2	y	1	8	11.3	CRH1-N177YT	0	FALSE	0	0.99	FALSE	1
812	979.455	11.3	CRH1-N177YT		1	FHNYTLDWAMDK	FHNYTLDWAMDK[812]	2	y	1	8	11.3	CRH1-N177YT	0	FALSE	0	0.99	FALSE	1
837	979.455	11.3	CRH1-N177YT		1	FHNYTLDWAMDK	FHNYTLDWAMDK[837]	2	y	1	8	11.3	CRH1-N177YT	0	FALSE	0	0.99	FALSE	1
862	979.455	11.3	CRH1-N177YT		1	FHNYTLDWAMDK	FHNYTLDWAMDK[862]	2	y	1	8	11.3	CRH1-N177YT	0	FALSE	0	0.99	FALSE	1
887	979.455	11.3	CRH1-N177YT		1	FHNYTLDWAMDK	FHNYTLDWAMDK[887]	2	y	1	8	11.3	CRH1-N177YT	0	FALSE	0	0.99	FALSE	1
912	979.455	11.3	CRH1-N177YT		1	FHNYTLDWAMDK	FHNYTLDWAMDK[912]	2	y	1	8	11.3	CRH1-N177YT	0	FALSE	0	0.99	FALSE	1
937	979.455	11.3	CRH1-N177YT		1	FHNYTLDWAMDK	FHNYTLDWAMDK[937]	2	y	1	8	11.3	CRH1-N177YT	0	FALSE	0	0.99	FALSE	1
962	979.455	11.3	CRH1-N177YT		1	FHNYTLDWAMDK	FHNYTLDWAMDK[962]	2	y	1	8	11.3	CRH1-N177YT	0	FALSE	0	0.99	FALSE	1
987	979.455	11.3	CRH1-N177YT		1	FHNYTLDWAMDK	FHNYTLDWAMDK[987]	2	y	1	8	11.3	CRH1-N177YT	0	FALSE	0	0.99	FALSE	1
1012	979.455	11.3	CRH1-N177YT		1	FHNYTLDWAMDK	FHNYTLDWAMDK[1012]	2	y	1	8	11.3	CRH1-N177YT	0	FALSE	0	0.99	FALSE	1
1037	979.455	11.3	CRH1-N177YT		1	FHNYTLDWAMDK	FHNYTLDWAMDK[1037]	2	y	1	8	11.3	CRH1-N177YT	0	FALSE	0	0.99	FALSE	1
1062	979.455	11.3	CRH1-N177YT		1	FHNYTLDWAMDK	FHNYTLDWAMDK[1062]	2	y	1	8	11.3	CRH1-N177YT	0	FALSE	0	0.99	FALSE	1
1087	979.455	11.3	CRH1-N177YT		1	FHNYTLDWAMDK	FHNYTLDWAMDK[1087]	2	y	1	8	11.3	CRH1-N177YT	0	FALSE	0	0.99	FALSE	1
1112	979.455	11.3	CRH1-N177YT		1	FHNYTLDWAMDK	FHNYTLDWAMDK[1112]	2	y	1	8	11.3	CRH1-N177YT	0	FALSE	0	0.99	FALSE	1
1137	979.455	11.3	CRH1-N177YT		1	FHNYTLDWAMDK	FHNYTLDWAMDK[1137]	2	y	1	8	11.3	CRH1-N177YT	0	FALSE	0	0.99	FALSE	1
1162	979.455	11.3	CRH1-N177YT		1	FHNYTLDWAMDK	FHNYTLDWAMDK[1162]	2	y	1	8	11.3	CRH1-N177YT	0	FALSE	0	0.99	FALSE	1
1187	979.455	11.3	CRH1-N177YT		1	FHNYTLDWAMDK	FHNYTLDWAMDK[1187]	2	y	1	8	11.3	CRH1-N177YT	0	FALSE	0	0.99	FALSE	1
1212	979.455	11.3	CRH1-N177YT		1	FHNYTLDWAMDK	FHNYTLDWAMDK[1212]	2	y	1	8	11.3	CRH1-N177YT	0	FALSE	0	0.99	FALSE	1
1237	979.455	11.3	CRH1-N177YT		1	FHNYTLDWAMDK	FHNYTLDWAMDK[1237]	2	y	1	8	11.3	CRH1-N177YT	0	FALSE	0	0.99	FALSE	1
412.5	490.231	11.3	CRH1-N177YT		1	FHNYTLDWAMDK	FHNYTLDWAMDK[412]	2	y	2	8	11.3	CRH1-N177YT	0	FALSE	0	0.99	FALSE	1
437	490.231	11.3	CRH1-N177YT		1	FHNYTLDWAMDK	FHNYTLDWAMDK[437]	2	y	2	8	11.3	CRH1-N177YT	0	FALSE	0	0.99	FALSE	1
462	490.231	11.3	CRH1-N177YT		1	FHNYTLDWAMDK	FHNYTLDWAMDK[462]	2	y	2	8	11.3	CRH1-N177YT	0	FALSE	0	0.99	FALSE	1
487	490.231	11.3	CRH1-N177YT		1	FHNYTLDWAMDK	FHNYTLDWAMDK[487]	2	y	2	8	11.3	CRH1-N177YT	0	FALSE	0	0.99	FALSE	1
512	490.231	12.3	CRH1-N177YT		1	FHNYTLDWAMDK	FHNYTLDWAMDK[512]	2	y	2	8	12.3	CRH1-N177YT	0	FALSE	0	0.99	FALSE	1
537	490.231	11.3	CRH1-N177YT		1	FHNYTLDWAMDK	FHNYTLDWAMDK[537]	2	y	2	8	11.3	CRH1-N177YT	0	FALSE	0	0.99	FALSE	1
562	490.231	11.3	CRH1-N177YT		1	FHNYTLDWAMDK	FHNYTLDWAMDK[562]	2	y	2	8	11.3	CRH1-N177YT	0	FALSE	0	0.99	FALSE	1
587	490.231	11.3	CRH1-N177YT		1	FHNYTLDWAMDK	FHNYTLDWAMDK[587]	2	y	2	8	11.3	CRH1-N177YT	0	FALSE	0	0.99	FALSE	1
612	490.231	11.3	CRH1-N177YT		1	FHNYTLDWAMDK	FHNYTLDWAMDK[612]	2	y	2	8	11.3	CRH1-N177YT	0	FALSE	0	0.99	FALSE	1
637	490.231	11.3	CRH1-N177YT		1	FHNYTLDWAMDK	FHNYTLDWAMDK[637]	2	y	2	8	11.3	CRH1-N177YT	0	FALSE	0	0.99	FALSE	1
662	490.231	11.3	CRH1-N177YT		1	FHNYTLDWAMDK	FHNYTLDWAMDK[662]	2	y	2	8	11.3	CRH1-N177YT	0	FALSE	0	0.99	FALSE	1
687	490.231	11.3	CRH1-N177YT		1	FHNYTLDWAMDK	FHNYTLDWAMDK[687]	2	y	2	8	11.3	CRH1-N177YT	0	FALSE	0	0.99	FALSE	1
712	490.231	11.3	CRH1-N177YT		1	FHNYTLDWAMDK	FHNYTLDWAMDK[712]	2	y	2	8	11.3	CRH1-N177YT	0	FALSE	0	0.99	FALSE	1
737	490.231	11.3	CRH1-N177YT		1	FHNYTLDWAMDK	FHNYTLDWAMDK[737]	2	y	2	8	11.3	CRH1-N177YT	0	FALSE	0	0.99	FALSE	1
762	490.231	11.3	CRH1-N177YT		1	FHNYTLDWAMDK	FHNYTLDWAMDK[762]	2	y	2	8	11.3	CRH1-N177YT	0	FALSE	0	0.99	FALSE	1
787	490.231	11.3	CRH1-N177YT		1	FHNYTLDWAMDK	FHNYTLDWAMDK[787]	2	y	2	8	11.3	CRH1-N177YT	0	FALSE	0	0.99	FALSE	1
812	490.231	11.3	CRH1-N177YT		1	FHNYTLDWAMDK	FHNYTLDWAMDK[812]	2	y	2	8	11.3	CRH1-N177YT	0	FALSE	0	0.99	FALSE	1
837	490.231	11.3	CRH1-N177YT		1	FHNYTLDWAMDK	FHNYTLDWAMDK[837]	2	y	2	8	11.3	CRH1-N177YT	0	FALSE	0	0.99	FALSE	1
862	490.231	11.3	CRH1-N177YT		1	FHNYTLDWAMDK	FHNYTLDWAMDK[862]	2	y	2	8	11.3	CRH1-N177YT	0	FALSE	0	0.99	FALSE	1
887	490.231	11.3	CRH1-N177YT		1	FHNYTLDWAMDK	FHNYTLDWAMDK[887]	2	y	2	8	11.3	CRH1-N177YT	0	FALSE	0	0.99	FALSE	1
912	490.231	11.3	CRH1-N177YT		1	FHNYTLDWAMDK	FHNYTLDWAMDK[912]	2	y	2	8	11.3	CRH1-N177YT	0	FALSE	0	0.99	FALSE	1
937	490.231	11.3	CRH1-N177YT		1	FHNYTLDWAMDK	FHNYTLDWAMDK[937]	2	y	2	8	11.3	CRH1-N177YT	0	FALSE	0	0.99	FALSE	1
962	490.231	11.3	CRH1-N177YT		1	FHNYTLDWAMDK	FHNYTLDWAMDK[962]	2	y	2	8	11.3	CRH1-N177YT	0	FALSE	0	0.99	FALSE	1
987	490.231	11.3	CRH1-N177YT		1	FHNYTLDWAMDK	FHNYTLDWAMDK[987]	2	y	2	8	11.3	CRH1-N177YT	0	FALSE	0	0.99	FALSE	1
1012	490.231	11.3	CRH1-N177YT		1	FHNYTLDWAMDK	FHNYTLDWAMDK[1012]	2	y	2	8	11.3	CRH1-N177YT	0	FALSE	0	0.99	FALSE	1
1037	490.231	11.3	CRH1-N177YT		1	FHNYTLDWAMDK	FHNYTLDWAMDK[1037]	2	y	2	8	11.3	CRH1-N177YT	0	FALSE	0	0.99	FALSE	1
1062	490.231	11.3	CRH1-N177YT		1	FHNYTLDWAMDK	FHNYTLDWAMDK[1062]	2	y	2	8	11.3	CRH1-N177YT	0	FALSE	0	0.99	FALSE	1
1087	490.231	11.3	CRH1-N177YT		1	FHNYTLDWAMDK	FHNYTLDWAMDK[1087]	2	y	2	8	11.3	CRH1-N177YT	0	FALSE	0	0.99	FALSE	1
1112	490.231	11.3	CRH1-N177YT		1	FHNYTLDWAMDK	FHNYTLDWAMDK[1112]	2	y	2	8	11.3	CRH1-N177YT	0	FALSE	0	0.99	FALSE	1
1137	490.231	11.3	CRH1-N177YT		1	FHNYTLDWAMDK	FHNYTLDWAMDK[1137]	2	y	2	8	11.3	CRH1-N177YT	0	FALSE	0	0.99	FALSE	1
1162	490.231	11.3	CRH1-N177YT		1	FHNYTLDWAMDK	FHNYTLDWAMDK[1162]	2	y	2	8	11.3	CRH1-N177YT	0	FALSE	0	0.99	FALSE	1
1187	490.231	11.3	CRH1-N177YT		1	FHNYTLDWAMDK	FHNYTLDWAMDK[1187]	2	y	2	8	11.3	CRH1-N177YT	0	FALSE	0	0.99	FALSE	1
1212	490.231	11.3	CRH1-N177YT		1	FHNYTLDWAMDK	FHNYTLDWAMDK[1212]	2	y	2	8	11.3	CRH1-N177YT	0	FALSE	0	0.99	FALSE	1
1237	490.231	11.3	CRH1-N177YT		1	FHNYTLDWAMDK	FHNYTLDWAMDK[1237]	2	y	2	8	11.3	CRH1-N177YT	0	FALSE	0	0.99	FALSE	1
412.5	1142.52	11.3	CRH1-N177YT		1	FHNYTLDWAMDK	FHNYTLDWAMDK[412]	2	y	1	9	11.3	CRH1-N177YT	0	FALSE	0	0.99	FALSE	1
437	1142.52	11.3	CRH1-N177YT		1	FHNYTLDWAMDK	FHNYTLDWAMDK[437]	2	y	1	9	11.3	CRH1-N177YT	0	FALSE	0	0.99	FALSE	1
462	1142.52	11.3	CRH1-N177YT		1	FHNYTLDWAMDK	FHNYTLDWAMDK[462]	2	y	1	9	11.3	CRH1-N177YT	0	FALSE	0	0.99	FALSE	1
487	1142.52	11.3	CRH1-N177YT		1	FHNYTLDWAMDK	FHNYTLDWAMDK[487]	2	y	1	9	11.3	CRH1-N177YT	0	FALSE	0	0.99	FALSE	1
512	1142.52	12.3	CRH1-N177YT		1	FHNYTLDWAMDK	FHNYTLDWAMDK[512]	2	y	1	9	12.3	CRH1-N177YT	0	FALSE	0	0.99	FALSE	1
537	1142.52	11.3	CRH1-N177YT		1	FHNYTLDWAMDK	FHNYTLDWAMDK[537]	2	y	1	9	11.3	CRH1-N177YT	0	FALSE	0	0.99	FALSE	1
562	1142.52	11.3	CRH1-N177YT		1	FHNYTLDWAMDK	FHNYTLDWAMDK[562]	2	y	1	9	11.3	CRH1-N177YT	0	FALSE	0	0.99	FALSE	1
587	1142.52	11.3	CRH1-N177YT		1	FHNYTLDWAMDK	FHNYTLDWAMDK[587]	2	y	1	9	11.3	CRH1-N177YT	0	FALSE	0	0.99	FALSE	1
612	1142.52	11.3	CRH1-N177YT		1	FHNYTLDWAMDK	FHNYTLDWAMDK[612]	2	y	1	9	11.3	CRH1-N177YT	0	FALSE	0	0.99	FALSE	1
637	1142.52	11.3	CRH1-N177YT		1	FHNYTLDWAMDK	FHNYTLDWAMDK[637]	2	y	1	9	11.3	CRH1-N177YT	0	FALSE	0	0.99	FALSE	1
662	1142.52	11.3	CRH1-N177YT		1	FHNYTLDWAMDK	FHNYTLDWAMDK[662]	2	y	1	9	11.3	CRH1-N177YT	0	FALSE	0	0.99	FALSE	1
687	1142.52	11.3	CRH1-N177YT		1	FHNYTLDWAMDK	FHNYTLDWAMDK[687]	2	y	1	9	11.3	CRH1-N177YT	0	FALSE	0	0.99	FALSE	1
712	1142.52	11.3	CRH1-N177YT		1	FHNYTLDWAMDK	FHNYTLDWAMDK[712]	2	y	1	9	11.3	CRH1-N177YT	0	FALSE	0	0.99	FALSE	1
737	1142.52	11.3	CRH1-N177YT		1	FHNYTLDWAMDK	FHNYTLDWAMDK[737]	2	y	1	9	11.3	CRH1-N177YT	0	FALSE	0	0.99	FALSE	1
762	1142.52	11.3	CRH1-N177YT		1	FHNYTLDWAMDK	FHNYTLDWAMDK[762]	2	y	1	9	11.3	CRH1-N177YT	0	FALSE	0	0.99	FALSE	1
787	1142.52	11.3	CRH1-N177YT		1	FHNYTLDWAMDK	FHNYTLDWAMDK[787]	2	y	1	9	11.3	CRH1-N177YT	0	FALSE	0	0.99	FALSE	1
812	1142.52	11.3	CRH1-N177YT		1	FHNYTLDWAMDK	FHNYTLDWAMDK[812]	2	y	1	9	11.3	CRH1-N177YT	0	FALSE	0	0.99	FALSE	1
837	1142.52	11.3	CRH1-N177YT		1	FHNYTLDWAMDK	FHNYTLDWAMDK[837]	2	y	1	9	11.3	CRH1-N177YT	0	FALSE	0	0.99	FALSE	1
862	1142.52	11.3	CRH1-N177YT		1	FHNYTLDWAMDK	FHNYTLDWAMDK[862]	2	y	1	9	11.3	CRH1-N177YT	0	FALSE	0	0.99	FALSE	1
887	1142.52	11.3	CRH1-N177YT		1	FHNYTLDWAMDK	FHNYTLDWAMDK[887]	2	y	1	9	11.3	CRH1-N177YT	0	FALSE	0	0.99	FALSE	1
912	1142.52	11.3	CRH1-N177YT		1	FHNYTLDWAMDK	FHNYTLDWAMDK[912]	2	y	1	9	11.3	CRH1-N177YT	0	FALSE	0	0.99	FALSE	1
937	1142.52	11.3	CRH1-N177YT		1	FHNYTLDWAMDK	FHNYTLDWAMDK[937]	2	y	1	9	11.3	CRH1-N177YT	0	FALSE	0	0.99	FALSE	1
962	1142.52	11.3	CRH1-N177YT		1	FHNYTLDWAMDK	FHNYTLDWAMDK[962]	2	y	1	9	11.3	CRH1-N177YT	0	FALSE	0	0.99	FALSE	1
987	1142.52	11.3	CRH1-N177YT		1	FHNYTLDWAMDK	FHNYTLDWAMDK[987]	2	y	1	9	11.3	CRH1-N177YT	0	FALSE	0	0.99	FALSE	1
1012	1142.52	11.3	CRH1-N177YT		1	FHNYTLDWAMDK	FHNYTLDWAMDK[1012]	2	y	1	9	11.3	CRH1-N177YT	0	FALSE	0	0.99	FALSE	1
1037	1142.52	11.3	CRH1-N177YT		1	FHNYTLDWAMDK	FHNYTLDWAMDK[1037]	2	y	1	9	11.3	CRH1-N177YT	0	FALSE	0	0.99	FALSE	1
1062	1142.52	11.3	CRH1-N177YT		1	FHNYTLDWAMDK	FHNYTLDWAMDK[1062]	2	y	1	9	11.3	CRH1-N177YT	0	FALSE	0	0.99	FALSE	1
1087	1142.52	11.3	CRH1-N177YT		1	FHNYTLDWAMDK	FHNYTLDWAMDK[1087]	2	y	1	9	11.3	CRH1-N177YT	0	FALSE	0	0.99	FALSE	1
1112	1142.52	11.3	CRH1-N177YT		1	FHNYTLDWAMDK	FHNYTLDWAMDK[1112]	2	y	1	9	11.3	CRH1-N177YT	0	FALSE	0	0.99	FALSE	1
1137	1142.52	11.3	CRH1-N177YT		1	FHNYTLDWAMDK	FHNYTLDWAMDK[1137]	2	y	1	9	11.3	CRH1-N177YT	0	FALSE	0	0.99	FALSE	1
1162	1142.52	11.3	CRH1-N177YT		1	FHNYTLDWAMDK	FHNYTLDWAMDK[1162]	2	y	1	9	11.3	CRH1-N177YT	0	FALSE	0	0.99	FALSE	1
1187	1142.52	11.3	CRH1-N177YT		1	FHNYTLDWAMDK	FHNYTLDWAMDK[1187]	2	y	1	9	11.3	CRH1-N177YT	0	FALSE	0	0.99	FALSE	1
1212	1142.52	11.3	CRH1-N177YT		1	FHNYTLDWAMDK	FHNYTLDWAMDK[1212]	2	y	1	9	11.3	CRH1-N177YT	0	FALSE	0	0.99	FALSE	1
1237	1142.52	11.3	CRH1-N177YT		1	FHNYTLDWAMDK	FHNYTLDWAMDK[1237]	2	y	1	9	11.3	CRH1-N177YT	0	FALSE	0	0.99	FALSE	1
412.5	571.763	11.3	CRH1-N177YT		1	FHNYTLDWAMDK	FHNYTLDWAMDK[412]	2	y	2	9	11.3	CRH1-N177YT	0	FALSE	0	0.99	FALSE	1
437	571.763	11.3	CRH1-N177YT		1	FHNYTLDWAMDK	FHNYTLDWAMDK[437]	2	y	2	9	11.3	CRH1-N177YT	0	FALSE	0	0.99	FALSE	1
462	571.763	11.3	CRH1-N177YT		1	FHNYTLDWAMDK	FHNYTLDWAMDK[462]	2	y	2	9	11.3	CRH1-N177YT	0	FALSE	0	0.99	FALSE	1
487	571.763	11.3	CRH1-N177YT		1	FHNYTLDWAMDK	FHNYTLDWAMDK[487]	2	y	2	9	11.3	CRH1-N177YT	0	FALSE	0	0.99	FALSE	1
512	571.763	12.3	CRH1-N177YT		1	FHNYTLDWAMDK	FHNYTLDWAMDK[512]	2	y	2	9	12.3	CRH1-N177YT	0	FALSE	0	0.99	FALSE	1
537	571.763	11.3	CRH1-N177YT		1	FHNYTLDWAMDK	FHNYTLDWAMDK[537]	2	y	2	9	11.3	CRH1-N177YT	0	FALSE	0	0.99	FALSE	1
562	571.763	11.3	CRH1-N177YT		1	FHNYTLDWAMDK	FHNYTLDWAMDK[562]	2	y	2	9	11.3	CRH1-N177YT	0	FALSE	0	0.99	FALSE	1
587	571.763	11.3	CRH1-N177YT		1	FHNYTLDWAMDK	FHNYTLDWAMDK[587]	2	y	2	9	11.3	CRH1-N177YT	0	FALSE	0	0.99	FALSE	1
612	571.763	11.3	CRH1-N177YT		1	FHNYTLDWAMDK	FHNYTLDWAMDK[612]	2	y	2	9	11.3	CRH1-N177YT	0	FALSE	0	0.99	FALSE	1
637	571.763	11.3	CRH1-N177YT		1	FHNYTLDWAMDK	FHNYTLDWAMDK[637]	2	y	2	9	11.3	CRH1-N177YT	0	FALSE	0	0.99	FALSE	1
662	571.763	11.3	CRH1-N177YT		1	FHNYTLDWAMDK	FHNYTLDWAMDK[662]	2	y	2	9	11.3	CRH1-N177YT	0	FALSE	0	0.99	FALSE	1
687	571.763	11.3	CRH1-N177YT		1	FHNYTLDWAMDK	FHNYTLDWAMDK[687]	2	y	2	9	11.3	CRH1-N177YT	0	FALSE	0	0.99	FALSE	1
712	571.763	11.3	CRH1-N177YT		1	FHNYTLDWAMDK	FHNYTLDWAMDK[712]	2	y	2	9	11.3	CRH1-N177YT	0	FALSE	0	0.99	FALSE	1
737	571.763	11.3	CRH1-N177YT		1	FHNYTLDWAMDK	FHNYTLDWAMDK[737]	2	y	2	9	11.3	CRH1-N177YT	0	FALSE	0	0.99	FALSE	1
762	571.763	11.3	CRH1-N177YT		1	FHNYTLDWAMDK	FHNYTLDWAMDK[762]	2	y	2	9	11.3	CRH1-N177YT	0	FALSE	0	0.99	FALSE	1
787	571.763	11.3	CRH1-N177YT		1	FHNYTLDWAMDK	FHNYTLDWAMDK[787]	2	y	2	9	11.3	CRH1-N177YT	0	FALSE	0	0.99	FALSE	1
812	571.763	11.3	CRH1-N177YT		1	FHNYTLDWAMDK	FHNYTLDWAMDK[812]	2	y	2	9	11.3	CRH1-N177YT	0	FALSE	0	0.99	FALSE	1
837	571.763	11.3	CRH1-N177YT		1	FHNYTLDWAMDK	FHNYTLDWAMDK[837]	2	y	2	9	11.3	CRH1-N177YT	0	FALSE	0	0.99	FALSE	1
862	571.763	11.3	CRH1-N177YT		1	FHNYTLDWAMDK	FHNYTLDWAMDK[862]	2	y	2	9	11.3	CRH1-N177YT	0	FALSE	0	0.99	FALSE	1
887	571.763	11.3	CRH1-N177YT		1	FHNYTLDWAMDK	FHNYTLDWAMDK[887]	2	y	2	9	11.3	CRH1-N177YT	0	FALSE	0	0.99	FALSE	1
912	571.763	11.3	CRH1-N177YT		1	FHNYTLDWAMDK	FHNYTLDWAMDK[912]	2	y	2	9	11.3	CRH1-N177YT	0	FALSE	0	0.99	FALSE	1
937	571.763	11.3	CRH1-N177YT		1	FHNYTLDWAMDK	FHNYTLDWAMDK[937]	2	y	2	9	11.3	CRH1-N177YT	0	FALSE	0	0.99	FALSE	1
962	571.763	11.3	CRH1-N177YT		1	FHNYTLDWAMDK	FHNYTLDWAMDK[962]	2	y	2	9	11.3	CRH1-N177YT	0	FALSE	0	0.99	FALSE	1
987	571.763	11.3	CRH1-N177YT		1	FHNYTLDWAMDK	FHNYTLDWAMDK[987]	2	y	2	9	11.3	CRH1-N177YT	0	FALSE	0	0.99	FALSE	1
1012	571.763	11.3	CRH1-N177YT		1	FHNYTLDWAMDK	FHNYTLDWAMDK[1012]	2	y	2	9	11.3	CRH1-N177YT	0	FALSE	0	0.99	FALSE	1
1037	571.763	11.3	CRH1-N177YT		1	FHNYTLDWAMDK	FHNYTLDWAMDK[1037]	2	y	2	9	11.3	CRH1-N177YT	0	FALSE	0	0.99	FALSE	1
1062	571.763	11.3	CRH1-N177YT		1	FHNYTLDWAMDK	FHNYTLDWAMDK[1062]	2	y	2	9	11.3	CRH1-N177YT	0	FALSE	0	0.99	FALSE	1
1087	571.763	11.3	CRH1-N177YT		1	FHNYTLDWAMDK	FHNYTLDWAMDK[1087]	2	y	2	9	11.3	CRH1-N177YT	0	FALSE	0	0.99	FALSE	1
1112	571.763	11.3	CRH1-N177YT		1	FHNYTLDWAMDK	FHNYTLDWAMDK[1112]	2	y	2	9	11.3	CRH1-N177YT	0	FALSE	0	0.99	FALSE	1
1137	571.763	11.3	CRH1-N177YT		1	FHNYTLDWAMDK	FHNYTLDWAMDK[1137]	2	y	2	9	11.3	CRH1-N177YT	0	FALSE	0	0.99	FALSE	1
1162	571.763	11.3	CRH1-N177YT		1	FHNYTLDWAMDK	FHNYTLDWAMDK[1162]	2	y	2	9	11.3	CRH1-N177YT	0	FALSE	0	0.99	FALSE	1
1187	571.763	11.3	CRH1-N177YT		1	FHNYTLDWAMDK	FHNYTLDWAMDK[1187]	2	y	2	9	11.3	CRH1-N177YT	0	FALSE	0	0.99	FALSE	1
1212	571.763	11.3	CRH1-N177YT		1	FHNYTLDWAMDK	FHNYTLDWAMDK[1212]	2	y	2	9	11.3	CRH1-N177YT	0	FALSE	0	0.99	FALSE	1
1237	571.763	11.3	CRH1-N177YT		1	FHNYTLDWAMDK	FHNYTLDWAMDK[1237]	2	y	2	9	11.3	CRH1-N177YT	0	FALSE	0	0.99	FALSE	1
412.5	263.139	10.1	GAS1-N95TT		1	VYAINTTLDHSECMK	VYAINTTLDHSEC[PPa]MK[412]	2	b	1	2	10.1	GAS1-N95TT	0	FALSE	0	0.99	FALSE	1
437	263.139	10.1	GAS1-N95TT		1	VYAINTTLDHSECMK	VYAINTTLDHSEC[PPa]MK[437]	2	b	1	2	10.1	GAS1-N95TT	0	FALSE	0	0.99	FALSE	1
462	263.139	10.1	GAS1-N95TT		1	VYAINTTLDHSECMK	VYAINTTLDHSEC[PPa]MK[462]	2	b	1	2	10.1	GAS1-N95TT	0	FALSE	0	0.99	FALSE	1
487	263.139	10.1	GAS1-N95TT		1	VYAINTTLDHSECMK	VYAINTTLDHSEC[PPa]MK[487]	2	b	1	2	10.1	GAS1-N95TT	0	FALSE	0	0.99	FALSE	1
512	263.139	10.1	GAS1-N95TT		1	VYAINTTLDHSECMK	VYAINTTLDHSEC[PPa]MK[512]	2	b	1	2	10.1	GAS1-N95TT	0	FALSE	0	0.99	FALSE	1
537	263.139	10.1	GAS1-N95TT		1	VYAINTTLDHSECMK	VYAINTTLDHSEC[PPa]MK[537]	2	b	1	2	10.1	GAS1-N95TT	0	FALSE	0	0.99	FALSE	1
562	263.139	10.1	GAS1-N95TT		1	VYAINTTLDHSECMK	VYAINTTLDHSEC[PPa]MK[562]	2	b	1	2	10.1	GAS1-N95TT	0	FALSE	0	0.99	FALSE	1
587	263.139	10.61	GAS1-N95TT		1	VYAINTTLDHSECMK	VYAINTTLDHSEC[PPa]MK[587]	2	b	1	2	10.61	GAS1-N95TT	0	FALSE	0	0.99	FALSE	1
612	263.139	10.61	GAS1-N95TT		1	VYAINTTLDHSECMK	VYAINTTLDHSEC[PPa]MK[612]	2	b	1	2	10.61	GAS1-N95TT	0	FALSE	0	0.99	FALSE	1
637	263.139	10.1	GAS1-N95TT		1	VYAINTTLDHSECMK	VYAINTTLDHSEC[PPa]MK[637]	2	b	1	2	10.1	GAS1-N95TT	0	FALSE	0	0.99	FALSE	1
662	263.139	10.1	GAS1-N95TT		1	VYAINTTLDHSECMK	VYAINTTLDHSEC[PPa]MK[662]	2	b	1	2	10.1	GAS1-N95TT	0	FALSE	0	0.99	FALSE	1
687	263.139	10.1	GAS1-N95TT		1	VYAINTTLDHSECMK	VYAINTTLDHSEC[PPa]MK[687]	2	b	1	2	10.1	GAS1-N95TT	0	FALSE	0	0.99	FALSE	1
712	263.139	10.1	GAS1-N95TT		1	VYAINTTLDHSECMK	VYAINTTLDHSEC[PPa]MK[712]	2	b	1	2	10.1	GAS1-N95TT	0	FALSE	0	0.99	FALSE	1
737	263.139	10.1	GAS1-N95TT		1	VYAINTTLDHSECMK	VYAINTTLDHSEC[PPa]MK[737]	2	b	1	2	10.1	GAS1-N95TT	0	FALSE	0	0.99	FALSE	1
762	263.139	10.1	GAS1-N95TT		1	VYAINTTLDHSECMK	VYAINTTLDHSEC[PPa]MK[762]	2	b	1	2	10.1	GAS1-N95TT	0	FALSE	0	0.99	FALSE	1
787	263.139	10.1	GAS1-N95TT		1	VYAINTTLDHSECMK	VYAINTTLDHSEC[PPa]MK[787]	2	b	1	2	10.1	GAS1-N95TT	0	FALSE	0	0.99	FALSE	1
812	263.139	10.1	GAS1-N95TT		1	VYAINTTLDHSECMK	VYAINTTLDHSEC[PPa]MK[812]	2	b	1	2	10.1	GAS1-N95TT	0	FALSE	0	0.99	FALSE	1
837	263.139	10.1	GAS1-N95TT		1	VYAINTTLDHSECMK	VYAINTTLDHSEC[PPa]MK[837]	2	b	1	2	10.1	GAS1-N95TT	0	FALSE	0	0.99	FALSE	1
862	263.139	10.1	GAS1-N95TT		1	VYAINTTLDHSECMK	VYAINTTLDHSEC[PPa]MK[862]	2	b	1	2	10.1	GAS1-N95TT	0	FALSE	0	0.99	FALSE	1
887	263.139	10.1	GAS1-N95TT		1	VYAINTTLDHSECMK	VYAINTTLDHSEC[PPa]MK[887]	2	b	1	2	10.1	GAS1-N95TT	0	FALSE	0	0.99	FALSE	1
912	263.139	10.1	GAS1-N95TT		1	VYAINTTLDHSECMK	VYAINTTLDHSEC[PPa]MK[912]	2	b	1	2	10.1	GAS1-N95TT	0	FALSE	0	0.99	FALSE	1
937	263.139	10.1	GAS1-N95TT		1	VYAINTTLDHSECMK	VYAINTTLDHSEC[PPa]MK[937]	2	b	1	2	10.1	GAS1-N95TT	0	FALSE	0	0.99	FALSE	1
962	263.139	10.1	GAS1-N95TT		1	VYAINTTLDHSECMK	VYAINTTLDHSEC[PPa]MK[962]	2	b	1	2	10.1	GAS1-N95TT	0	FALSE	0	0.99	FALSE	1
987	263.139	10.1	GAS1-N95TT		1	VYAINTTLDHSECMK	VYAINTTLDHSEC[PPa]MK[987]	2	b	1	2	10.1	GAS1-N95TT	0	FALSE	0	0.99	FALSE	1
1012	263.139	10.1	GAS1-N95TT		1	VYAINTTLDHSECMK	VYAINTTLDHSEC[PPa]MK[1012]	2	b	1	2	10.1	GAS1-N95TT	0	FALSE	0	0.99	FALSE	1
1037	263.139	10.1	GAS1-N95TT		1	VYAINTTLDHSECMK	VYAINTTLDHSEC[PPa]MK[1037]	2	b	1	2	10.1	GAS1-N95TT	0	FALSE	0	0.99	FALSE	1
1062	263.139	10.1	GAS1-N95TT		1	VYAINTTLDHSECMK	VYAINTTLDHSEC[PPa]MK[1062]	2	b	1	2	10.1	GAS1-N95TT	0	FALSE	0	0.99	FALSE	1
1087	263.139	10.1	GAS1-N95TT		1	VYAINTTLDHSECMK	VYAINTTLDHSEC[PPa]MK[1087]	2	b	1	2	10.1	GAS1-N95TT	0	FALSE	0	0.99	FALSE	1
1112	263.139	10.1	GAS1-N95TT		1	VYAINTTLDHSECMK	VYAINTTLDHSEC[PPa]MK[1112]	2	b	1	2	10.1	GAS1-N95TT	0	FALSE	0	0.99	FALSE	1
1137	263.139	10.1	GAS1-N95TT		1	VYAINTTLDHSECMK	VYAINTTLDHSEC[PPa]MK[1137]	2	b	1	2	10.1	GAS1-N95TT	0	FALSE	0	0.99	FALSE	1
1162	263.139	10.1	GAS1-N95TT		1	VYAINTTLDHSECMK	VYAINTTLDHSEC[PPa]MK[1162]	2	b	1	2	10.1	GAS1-N95TT	0	FALSE	0	0.99	FALSE	1
1187	263.139	10.1	GAS1-N95TT		1	VYAINTTLDHSECMK	VYAINTTLDHSEC[PPa]MK[1187]	2	b	1	2	10.1	GAS1-N95TT	0	FALSE	0	0.99	FALSE	1
1212	263.139	10.1	GAS1-N95TT		1	VYAINTTLDHSECMK	VYAINTTLDHSEC[PPa]MK[1212]	2	b	1	2	10.1	GAS1-N95TT	0	FALSE	0	0.99	FALSE	1
1237	263.139	10.1	GAS1-N95TT		1	VYAINTTLDHSECMK	VYAINTTLDHSEC[PPa]MK[1237]	2	b	1	2	10.1	GAS1-N95TT	0	FALSE	0	0.99	FALSE	1
412.5	278.153	10.1	GAS1-N95TT		1	VYAINTTLDHSECMK	VYAINTTLDHSEC[PPa]MK[412]	2	y	1	2	10.1	GAS1-N95TT	0	FALSE	0	0.99	FALSE	1
437	278.153	10.1	GAS1-N95TT		1	VYAINTTLDHSECMK	VYAINTTLDHSEC[PPa]MK[437]	2	y	1	2	10.1	GAS1-N95TT	0	FALSE	0	0.99	FALSE	1
462	278.153	10.1	GAS1-N95TT		1	VYAINTTLDHSECMK	VYAINTTLDHSEC[PPa]MK[462]	2	y	1	2	10.1	GAS1-N95TT	0	FALSE	0	0.99	FALSE	1
487	278.153	10.1	GAS1-N95TT		1	VYAINTTLDHSECMK	VYAINTTLDHSEC[PPa]MK[487]	2	y	1	2	10.1	GAS1-N95TT	0	FALSE	0	0.99	FALSE	1
512	278.153	10.1	GAS1-N95TT		1	VYAINTTLDHSECMK	VYAINTTLDHSEC[PPa]MK[512]	2	y	1	2	10.1	GAS1-N95TT	0	FALSE	0	0.99	FALSE	1
537	278.153	10.1	GAS1-N95TT		1	VYAINTTLDHSECMK	VYAINTTLDHSEC[PPa]MK[537]	2	y	1	2	10.1	GAS1-N95TT	0	FALSE	0	0.99	FALSE	1
562	278.153	10.1	GAS1-N95TT		1	VYAINTTLDHSECMK	VYAINTTLDHSEC[PPa]MK[562]	2	y	1	2	10.1	GAS1-N95TT	0	FALSE	0	0.99	FALSE	1
587	278.153	10.61	GAS1-N95TT		1	VYAINTTLDHSECMK	VYAINTTLDHSEC[PPa]MK[587]	2	y	1	2	10.61	GAS1-N95TT	0	FALSE	0	0.99	FALSE	1
612	278.153	10.61	GAS1-N95TT		1	VYAINTTLDHSECMK	VYAINTTLDHSEC[PPa]MK[612]	2	y	1	2	10.61	GAS1-N95TT	0	FALSE	0	0.99	FALSE	1
637	278.153	10.1	GAS1-N95TT		1	VYAINTTLDHSECMK	VYAINTTLDHSEC[PPa]MK[637]	2	y	1	2	10.1	GAS1-N95TT	0	FALSE	0	0.99	FALSE	1
662	278.153	10.1	GAS1-N95TT		1	VYAINTTLDHSECMK	VYAINTTLDHSEC[PPa]MK[662]	2	y	1	2	10.1	GAS1-N95TT	0	FALSE	0	0.99	FALSE	1
687	278.153	10.1	GAS1-N95TT		1	VYAINTTLDHSECMK	VYAINTTLDHSEC[PPa]MK[687]	2	y	1	2	10.1	GAS1-N95TT	0	FALSE	0	0.99	FALSE	1
712	278.153	10.1	GAS1-N95TT		1	VYAINTTLDHSECMK	VYAINTTLDHSEC[PPa]MK[712]	2	y	1	2	10.1	GAS1-N95TT	0	FALSE	0	0.99	FALSE	1
737	278.153	10.1	GAS1-N95TT		1	VYAINTTLDHSECMK	VYAINTTLDHSEC[PPa]MK[737]	2	y	1	2	10.1	GAS1-N95TT	0	FALSE	0	0.99	FALSE	1
762	278.153	10.1	GAS1-N95TT		1	VYAINTTLDHSECMK	VYAINTTLDHSEC[PPa]MK[762]	2	y	1	2	10.1	GAS1-N95TT	0	FALSE	0	0.99	FALSE	1
787	278.153	10.1	GAS1-N95TT		1	VYAINTTLDHSECMK	VYAINTTLDHSEC[PPa]MK[787]	2	y	1	2	10.1	GAS1-N95TT	0	FALSE	0	0.99	FALSE	1
812	278.153	10.1	GAS1-N95TT		1	VYAINTTLDHSECMK	VYAINTTLDHSEC[PPa]MK[812]	2	y	1	2	10.1	GAS1-N95TT	0	FALSE	0	0.99	FALSE	1
837	278.153	10.1	GAS1-N95TT		1	VYAINTTLDHSECMK	VYAINTTLDHSEC[PPa]MK[837]	2	y	1	2	10.1	GAS1-N95TT	0	FALSE	0	0.99	FALSE	1
862	278.153	10.1	GAS1-N95TT		1	VYAINTTLDHSECMK	VYAINTTLDHSEC[PPa]MK[862]	2	y	1	2	10.1	GAS1-N95TT	0	FALSE	0	0.99	FALSE	1
887	278.153	10.1	GAS1-N95TT		1	VYAINTTLDHSECMK	VYAINTTLDHSEC[PPa]MK[887]	2	y	1	2	10.1	GAS1-N95TT	0	FALSE	0	0.99	FALSE	1
912	278.153	10.1	GAS1-N95TT		1	VYAINTTLDHSECMK	VYAINTTLDHSEC[PPa]MK[912]	2	y	1	2	10.1	GAS1-N95TT	0	FALSE	0	0.99	FALSE	1
937	278.153	10.1	GAS1-N95TT		1	VYAINTTLDHSECMK	VYAINTTLDHSEC[PPa]MK[937]	2	y	1	2	10.1	GAS1-N95TT	0	FALSE	0	0.99	FALSE	1
962	278.153	10.1	GAS1-N95TT		1	VYAINTTLDHSECMK	VYAINTTLDHSEC[PPa]MK[962]	2	y	1	2	10.1	GAS1-N95TT	0	FALSE	0	0.99	FALSE	1
987	278.153	10.1	GAS1-N95TT		1	VYAINTTLDHSECMK	VYAINTTLDHSEC[PPa]MK[987]	2	y	1	2	10.1	GAS1-N95TT	0	FALSE	0	0.99	FALSE	1
1012	278.153	10.1	GAS1-N95TT		1	VYAINTTLDHSECMK	VYAINTTLDHSEC[PPa]MK[1012]	2	y	1	2	10.1	GAS1-N95TT	0	FALSE	0	0.99	FALSE	1
1037	278.153	10.1	GAS1-N95TT		1	VYAINTTLDHSECMK	VYAINTTLDHSEC[PPa]MK[1037]	2	y	1	2	10.1	GAS1-N95TT	0	FALSE	0	0.99	FALSE	1
1062	278.153	10.1	GAS1-N95TT		1	VYAINTTLDHSECMK	VYAINTTLDHSEC[PPa]MK[1062]	2	y	1	2	10.1	GAS1-N95TT	0	FALSE	0	0.99	FALSE	1
1087	278.153	10.1	GAS1-N95TT		1	VYAINTTLDHSECMK	VYAINTTLDHSEC[PPa]MK[1087]	2	y	1	2	10.1	GAS1-N95TT	0	FALSE	0	0.99	FALSE	1
1112	278.153	10.1	GAS1-N95TT		1	VYAINTTLDHSECMK	VYAINTTLDHSEC[PPa]MK[1112]	2	y	1	2	10.1	GAS1-N95TT	0	FALSE	0	0.99	FALSE	1
1137	278.153	10.1	GAS1-N95TT		1	VYAINTTLDHSECMK	VYAINTTLDHSEC[PPa]MK[1137]	2	y	1	2	10.1	GAS1-N95TT	0	FALSE	0	0.99	FALSE	1
1162	278.153	10.1	GAS1-N95TT		1	VYAINTTLDHSECMK	VYAINTTLDHSEC[PPa]MK[1162]	2	y	1	2	10.1	GAS1-N95TT	0	FALSE	0	0.99	FALSE	1
1187	278.153	10.1	GAS1-N95TT		1	VYAINTTLDHSECMK	VYAINTTLDHSEC[PPa]MK[1187]	2	y	1	2	10.1	GAS1-N95TT	0	FALSE	0	0.99	FALSE	1
1212	278.153	10.1	GAS1-N95TT		1	VYAINTTLDHSECMK	VYAINTTLDHSEC[PPa]MK[1212]	2	y	1	2	10.1	GAS1-N95TT	0	FALSE	0	0.99	FALSE	1
1237	278.153	10.1	GAS1-N95TT		1	VYAINTTLDHSECMK	VYAINTTLDHSEC[PPa]MK[1237]	2	y	1	2	10.1	GAS1-N95TT	0	FALSE	0	0.99	FALSE	1
412.5	132.073	10.1	GAS1-N95TT		1	VYAINTTLDHSECMK	VYAINTTLDHSEC[PPa]MK[412]	2	b	2	2	10.1	GAS1-N95TT	0	FALSE	0	0.99	FALSE	1
437	132.073	10.1	GAS1-N95TT		1	VYAINTTLDHSECMK	VYAINTTLDHSEC[PPa]MK[437]	2	b	2	2	10.1	GAS1-N95TT	0	FALSE	0	0.99	FALSE	1
462	132.073	10.1	GAS1-N95TT		1	VYAINTTLDHSECMK	VYAINTTLDHSEC[PPa]MK[462]	2	b	2	2	10.1	GAS1-N95TT	0	FALSE	0	0.99	FALSE	1
487	132.073	10.1	GAS1-N95TT		1	VYAINTTLDHSECMK	VYAINTTLDHSEC[PPa]MK[487]	2	b	2	2	10.1	GAS1-N95TT	0	FALSE	0	0.99	FALSE	1
512	132.073	10.1	GAS1-N95TT		1	VYAINTTLDHSECMK	VYAINTTLDHSEC[PPa]MK[512]	2	b	2	2	10.1	GAS1-N95TT	0	FALSE	0	0.99	FALSE	1
537	132.073	10.1	GAS1-N95TT		1	VYAINTTLDHSECMK	VYAINTTLDHSEC[PPa]MK[537]	2	b	2	2	10.1	GAS1-N95TT	0	FALSE	0	0.99	FALSE	1
562	132.073	10.1	GAS1-N95TT		1	VYAINTTLDHSECMK	VYAINTTLDHSEC[PPa]MK[562]	2	b	2	2	10.1	GAS1-N95TT	0	FALSE	0	0.99	FALSE	1
587	132.073	10.61	GAS1-N95TT		1	VYAINTTLDHSECMK	VYAINTTLDHSEC[PPa]MK[587]	2	b	2	2	10.61	GAS1-N95TT	0	FALSE	0	0.99	FALSE	1
612	132.073	10.61	GAS1-N95TT		1	VYAINTTLDHSECMK	VYAINTTLDHSEC[PPa]MK[612]	2	b	2	2	10.61	GAS1-N95TT	0	FALSE	0	0.99	FALSE	1
637	132.073	10.1	GAS1-N95TT		1	VYAINTTLDHSECMK	VYAINTTLDHSEC[PPa]MK[637]	2	b	2	2	10.1	GAS1-N95TT	0	FALSE	0	0.99	FALSE	1
662	132.073	10.1	GAS1-N95TT		1	VYAINTTLDHSECMK	VYAINTTLDHSEC[PPa]MK[662]	2	b	2	2	10.1	GAS1-N95TT	0	FALSE	0	0.99	FALSE	1
687	132.073	10.1	GAS1-N95TT		1	VYAINTTLDHSECMK	VYAINTTLDHSEC[PPa]MK[687]	2	b	2	2	10.1	GAS1-N95TT	0	FALSE	0	0.99	FALSE	1
712	132.073	10.1	GAS1-N95TT		1	VYAINTTLDHSECMK	VYAINTTLDHSEC[PPa]MK[712]	2	b	2	2	10.1	GAS1-N95TT	0	FALSE	0	0.99	FALSE	1
737	132.073	10.1	GAS1-N95TT		1	VYAINTTLDHSECMK	VYAINTTLDHSEC[PPa]MK[737]	2	b	2	2	10.1	GAS1-N95TT	0	FALSE	0	0.99	FALSE	1
762	132.073	10.1	GAS1-N95TT		1	VYAINTTLDHSECMK	VYAINTTLDHSEC[PPa]MK[762]	2	b	2	2	10.1	GAS1-N95TT	0	FALSE	0	0.99	FALSE	1
787	132.073	10.1	GAS1-N95TT		1	VYAINTTLDHSECMK	VYAINTTLDHSEC[PPa]MK[787]	2	b	2	2	10.1	GAS1-N95TT	0	FALSE	0	0.99	FALSE	1
812	132.073	10.1	GAS1-N95TT		1	VYAINTTLDHSECMK	VYAINTTLDHSEC[PPa]MK[812]	2	b	2	2	10.1	GAS1-N95TT	0	FALSE	0	0.99	FALSE	1
837	132.073	10.1	GAS1-N95TT		1	VYAINTTLDHSECMK	VYAINTTLDHSEC[PPa]MK[837]	2	b	2	2	10.1	GAS1-N95TT	0	FALSE	0	0.99	FALSE	1
862	132.073	10.1	GAS1-N95TT		1	VYAINTTLDHSECMK	VYAINTTLDHSEC[PPa]MK[862]	2	b	2	2	10.1	GAS1-N95TT	0	FALSE	0	0.99	FALSE	1
887	132.073	10.1	GAS1-N95TT		1	VYAINTTLDHSECMK	VYAINTTLDHSEC[PPa]MK[887]	2	b	2	2	10.1	GAS1-N95TT	0	FALSE	0	0.99	FALSE	1
912	132.073	10.1	GAS1-N95TT		1	VYAINTTLDHSECMK	VYAINTTLDHSEC[PPa]MK[912]	2	b	2	2	10.1	GAS1-N95TT	0	FALSE	0	0.99	FALSE	1
937	132.073	10.1	GAS1-N95TT		1	VYAINTTLDHSECMK	VYAINTTLDHSEC[PPa]MK[937]	2	b	2	2	10.1	GAS1-N95TT	0	FALSE	0	0.99	FALSE	1
962	132.073	10.1	GAS1-N95TT		1	VYAINTTLDHSECMK	VYAINTTLDHSEC[PPa]MK[962]	2	b	2	2	10.1	GAS1-N95TT	0	FALSE	0	0.99	FALSE	1
987	132.073	10.1	GAS1-N95TT		1	VYAINTTLDHSECMK	VYAINTTLDHSEC[PPa]MK[987]	2	b	2	2	10.1	GAS1-N95TT	0	FALSE	0	0.99	FALSE	1
1012	132.073	10.1	GAS1-N95TT		1	VYAINTTLDHSECMK	VYAINTTLDHSEC[PPa]MK[1012]	2	b	2	2	10.1	GAS1-N95TT	0	FALSE	0	0.99	FALSE	1
1037	132.073	10.1	GAS1-N95TT		1	VYAINTTLDHSECMK	VYAINTTLDHSEC[PPa]MK[1037]	2	b	2	2	10.1	GAS1-N95TT	0	FALSE	0	0.99	FALSE	1
1062	132.073	10.1	GAS1-N95TT		1	VYAINTTLDHSECMK	VYAINTTLDHSEC[PPa]MK[1062]	2	b	2	2	10.1	GAS1-N95TT	0	FALSE	0	0.99	FALSE	1
1087	132.073	10.1	GAS1-N95TT		1	VYAINTTLDHSECMK	VYAINTTLDHSEC[PPa]MK[1087]	2	b	2	2	10.1	GAS1-N95TT	0	FALSE	0	0.99	FALSE	1
1112	132.073	10.1	GAS1-N95TT		1	VYAINTTLDHSECMK	VYAINTTLDHSEC[PPa]MK[1112]	2	b	2	2	10.1	GAS1-N95TT	0	FALSE	0	0.99	FALSE	1
1137	132.073	10.1	GAS1-N95TT		1	VYAINTTLDHSECMK	VYAINTTLDHSEC[PPa]MK[1137]	2	b	2	2	10.1	GAS1-N95TT	0	FALSE	0	0.99	FALSE	1
1162	132.073	10.1	GAS1-N95TT		1	VYAINTTLDHSECMK	VYAINTTLDHSEC[PPa]MK[1162]	2	b	2	2	10.1	GAS1-N95TT	0	FALSE	0	0.99	FALSE	1
1187	132.073	10.1	GAS1-N95TT		1	VYAINTTLDHSECMK	VYAINTTLDHSEC[PPa]MK[1187]	2	b	2	2	10.1	GAS1-N95TT	0	FALSE	0	0.99	FALSE	1
1212	132.073	10.1	GAS1-N95TT		1	VYAINTTLDHSECMK	VYAINTTLDHSEC[PPa]MK[1212]	2	b	2	2	10.1	GAS1-N95TT	0	FALSE	0	0.99	FALSE	1
1237	132.073	10.1	GAS1-N95TT		1	VYAINTTLDHSECMK	VYAINTTLDHSEC[PPa]MK[1237]	2	b	2	2	10.1	GAS1-N95TT	0	FALSE	0	0.99	FALSE	1
412.5	139.58	10.1	GAS1-N95TT		1	VYAINTTLDHSECMK	VYAINTTLDHSEC[PPa]MK[412]	2	y	2	2	10.1	GAS1-N95TT	0	FALSE	0	0.99	FALSE	1
437	139.58	10.1	GAS1-N95TT		1	VYAINTTLDHSECMK	VYAINTTLDHSEC[PPa]MK[437]	2	y	2	2	10.1	GAS1-N95TT	0	FALSE	0	0.99	FALSE	1
462	139.58	10.1	GAS1-N95TT		1	VYAINTTLDHSECMK	VYAINTTLDHSEC[PPa]MK[462]	2	y	2	2	10.1	GAS1-N95TT	0	FALSE	0	0.99	FALSE	1
487	139.58	10.1	GAS1-N95TT		1	VYAINTTLDHSECMK	VYAINTTLDHSEC[PPa]MK[487]	2	y	2	2	10.1	GAS1-N95TT	0	FALSE	0	0.99	FALSE	1
512	139.58	10.1	GAS1-N95TT		1	VYAINTTLDHSECMK	VYAINTTLDHSEC[PPa]MK[512]	2	y	2	2	10.1	GAS1-N95TT	0	FALSE	0	0.99	FALSE	1
537	139.58	10.1	GAS1-N95TT		1	VYAINTTLDHSECMK	VYAINTTLDHSEC[PPa]MK[537]	2	y	2	2	10.1	GAS1-N95TT	0	FALSE	0	0.99	FALSE	1
562	139.58	10.1	GAS1-N95TT		1	VYAINTTLDHSECMK	VYAINTTLDHSEC[PPa]MK[562]	2	y	2	2	10.1	GAS1-N95TT	0	FALSE	0	0.99	FALSE	1
587	139.58	10.61	GAS1-N95TT		1	VYAINTTLDHSECMK	VYAINTTLDHSEC[PPa]MK[587]	2	y	2	2	10.61	GAS1-N95TT	0	FALSE	0	0.99	FALSE	1
612	139.58	10.61	GAS1-N95TT		1	VYAINTTLDHSECMK	VYAINTTLDHSEC[PPa]MK[612]	2	y	2	2	10.61	GAS1-N95TT	0	FALSE	0	0.99	FALSE	1
637	139.58	10.1	GAS1-N95TT		1	VYAINTTLDHSECMK	VYAINTTLDHSEC[PPa]MK[637]	2	y	2	2	10.1	GAS1-N95TT	0	FALSE	0	0.99	FALSE	1
662	139.58	10.1	GAS1-N95TT		1	VYAINTTLDHSECMK	VYAINTTLDHSEC[PPa]MK[662]	2	y	2	2	10.1	GAS1-N95TT	0	FALSE	0	0.99	FALSE	1
687	139.58	10.1	GAS1-N95TT		1	VYAINTTLDHSECMK	VYAINTTLDHSEC[PPa]MK[687]	2	y	2	2	10.1	GAS1-N95TT	0	FALSE	0	0.99	FALSE	1
712	139.58	10.1	GAS1-N95TT		1	VYAINTTLDHSECMK	VYAINTTLDHSEC[PPa]MK[712]	2	y	2	2	10.1	GAS1-N95TT	0	FALSE	0	0.99	FALSE	1
737	139.58	10.1	GAS1-N95TT		1	VYAINTTLDHSECMK	VYAINTTLDHSEC[PPa]MK[737]	2	y	2	2	10.1	GAS1-N95TT	0	FALSE	0	0.99	FALSE	1
762	139.58	10.1	GAS1-N95TT		1	VYAINTTLDHSECMK	VYAINTTLDHSEC[PPa]MK[762]	2	y	2	2	10.1	GAS1-N95TT	0	FALSE	0	0.99	FALSE	1
787	139.58	10.1	GAS1-N95TT		1	VYAINTTLDHSECMK	VYAINTTLDHSEC[PPa]MK[787]	2	y	2	2	10.1	GAS1-N95TT	0	FALSE	0	0.99	FALSE	1
812	139.58	10.1	GAS1-N95TT		1	VYAINTTLDHSECMK	VYAINTTLDHSEC[PPa]MK[812]	2	y	2	2	10.1	GAS1-N95TT	0	FALSE	0	0.99	FALSE	1
837	139.58	10.1	GAS1-N95TT		1	VYAINTTLDHSECMK	VYAINTTLDHSEC[PPa]MK[837]	2	y	2	2	10.1	GAS1-N95TT	0	FALSE	0	0.99	FALSE	1
862	139.58	10.1	GAS1-N95TT		1	VYAINTTLDHSECMK	VYAINTTLDHSEC[PPa]MK[862]	2	y	2	2	10.1	GAS1-N95TT	0	FALSE	0	0.99	FALSE	1
887	139.58	10.1	GAS1-N95TT		1	VYAINTTLDHSECMK	VYAINTTLDHSEC[PPa]MK[887]	2	y	2	2	10.1	GAS1-N95TT	0	FALSE	0	0.99	FALSE	1
912	139.58	10.1	GAS1-N95TT		1	VYAINTTLDHSECMK	VYAINTTLDHSEC[PPa]MK[912]	2	y	2	2	10.1	GAS1-N95TT	0	FALSE	0	0.99	FALSE	1
937	139.58	10.1	GAS1-N95TT		1	VYAINTTLDHSECMK	VYAINTTLDHSEC[PPa]MK[937]	2	y	2	2	10.1	GAS1-N95TT	0	FALSE	0	0.99	FALSE	1
962	139.58	10.1	GAS1-N95TT		1	VYAINTTLDHSECMK	VYAINTTLDHSEC[PPa]MK[962]	2	y	2	2	10.1	GAS1-N95TT	0	FALSE	0	0.99	FALSE	1
987	139.58	10.1	GAS1-N95TT		1	VYAINTTLDHSECMK	VYAINTTLDHSEC[PPa]MK[987]	2	y	2	2	10.1	GAS1-N95TT	0	FALSE	0	0.99	FALSE	1
1012	139.58	10.1	GAS1-N95TT		1	VYAINTTLDHSECMK	VYAINTTLDHSEC[PPa]MK[1012]	2	y	2	2	10.1	GAS1-N95TT	0	FALSE	0	0.99	FALSE	1
1037	139.58	10.1	GAS1-N95TT		1	VYAINTTLDHSECMK	VYAINTTLDHSEC[PPa]MK[1037]	2	y	2	2	10.1	GAS1-N95TT	0	FALSE	0	0.99	FALSE	1
1062	139.58	10.1	GAS1-N95TT		1	VYAINTTLDHSECMK	VYAINTTLDHSEC[PPa]MK[1062]	2	y	2	2	10.1	GAS1-N95TT	0	FALSE	0	0.99	FALSE	1
1087	139.58	10.1	GAS1-N95TT		1	VYAINTTLDHSECMK	VYAINTTLDHSEC[PPa]MK[1087]	2	y	2	2	10.1	GAS1-N95TT	0	FALSE	0	0.99	FALSE	1
1112	139.58	10.1	GAS1-N95TT		1	VYAINTTLDHSECMK	VYAINTTLDHSEC[PPa]MK[1112]	2	y	2	2	10.1	GAS1-N95TT	0	FALSE	0	0.99	FALSE	1
1137	139.58	10.1	GAS1-N95TT		1	VYAINTTLDHSECMK	VYAINTTLDHSEC[PPa]MK[1137]	2	y	2	2	10.1	GAS1-N95TT	0	FALSE	0	0.99	FALSE	1
1162	139.58	10.1	GAS1-N95TT		1	VYAINTTLDHSECMK	VYAINTTLDHSEC[PPa]MK[1162]	2	y	2	2	10.1	GAS1-N95TT	0	FALSE	0	0.99	FALSE	1
1187	139.58	10.1	GAS1-N95TT		1	VYAINTTLDHSECMK	VYAINTTLDHSEC[PPa]MK[1187]	2	y	2	2	10.1	GAS1-N95TT	0	FALSE	0	0.99	FALSE	1
1212	139.58	10.1	GAS1-N95TT		1	VYAINTTLDHSECMK	VYAINTTLDHSEC[PPa]MK[1212]	2	y	2	2	10.1	GAS1-N95TT	0	FALSE	0	0.99	FALSE	1
1237	139.58	10.1	GAS1-N95TT		1	VYAINTTLDHSECMK	VYAINTTLDHSEC[PPa]MK[1237]	2	y	2	2	10.1	GAS1-N95TT	0	FALSE	0	0.99	FALSE	1
412.5	334.176	10.1	GAS1-N95TT		1	VYAINTTLDHSECMK	VYAINTTLDHSEC[PPa]MK[412]	2	b	1	3	10.1	GAS1-N95TT	0	FALSE	0	0.99	FALSE	1
437	334.176	10.1	GAS1-N95TT		1	VYAINTTLDHSECMK	VYAINTTLDHSEC[PPa]MK[437]	2	b	1	3	10.1	GAS1-N95TT	0	FALSE	0	0.99	FALSE	1
462	334.176	10.1	GAS1-N95TT		1	VYAINTTLDHSECMK	VYAINTTLDHSEC[PPa]MK[462]	2	b	1	3	10.1	GAS1-N95TT	0	FALSE	0	0.99	FALSE	1
487	334.176	10.1	GAS1-N95TT		1	VYAINTTLDHSECMK	VYAINTTLDHSEC[PPa]MK[487]	2	b	1	3	10.1	GAS1-N95TT	0	FALSE	0	0.99	FALSE	1
512	334.176	10.1	GAS1-N95TT		1	VYAINTTLDHSECMK	VYAINTTLDHSEC[PPa]MK[512]	2	b	1	3	10.1	GAS1-N95TT	0	FALSE	0	0.99	FALSE	1
537	334.176	10.1	GAS1-N95TT		1	VYAINTTLDHSECMK	VYAINTTLDHSEC[PPa]MK[537]	2	b	1	3	10.1	GAS1-N95TT	0	FALSE	0	0.99	FALSE	1
562	334.176	10.1	GAS1-N95TT		1	VYAINTTLDHSECMK	VYAINTTLDHSEC[PPa]MK[562]	2	b	1	3	10.1	GAS1-N95TT	0	FALSE	0	0.99	FALSE	1
587	334.176	10.61	GAS1-N95TT		1	VYAINTTLDHSECMK	VYAINTTLDHSEC[PPa]MK[587]	2	b	1	3	10.61	GAS1-N95TT	0	FALSE	0	0.99	FALSE	1
612	334.176	10.61	GAS1-N95TT		1	VYAINTTLDHSECMK	VYAINTTLDHSEC[PPa]MK[612]	2	b	1	3	10.61	GAS1-N95TT	0	FALSE	0	0.99	FALSE	1
637	334.176	10.1	GAS1-N95TT		1	VYAINTTLDHSECMK	VYAINTTLDHSEC[PPa]MK[637]	2	b	1	3	10.1	GAS1-N95TT	0	FALSE	0	0.99	FALSE	1
662	334.176	10.1	GAS1-N95TT		1	VYAINTTLDHSECMK	VYAINTTLDHSEC[PPa]MK[662]	2	b	1	3	10.1	GAS1-N95TT	0	FALSE	0	0.99	FALSE	1
687	334.176	10.1	GAS1-N95TT		1	VYAINTTLDHSECMK	VYAINTTLDHSEC[PPa]MK[687]	2	b	1	3	10.1	GAS1-N95TT	0	FALSE	0	0.99	FALSE	1
712	334.176	10.1	GAS1-N95TT		1	VYAINTTLDHSECMK	VYAINTTLDHSEC[PPa]MK[712]	2	b	1	3	10.1	GAS1-N95TT	0	FALSE	0	0.99	FALSE	1
737	334.176	10.1	GAS1-N95TT		1	VYAINTTLDHSECMK	VYAINTTLDHSEC[PPa]MK[737]	2	b	1	3	10.1	GAS1-N95TT	0	FALSE	0	0.99	FALSE	1
762	334.176	10.1	GAS1-N95TT		1	VYAINTTLDHSECMK	VYAINTTLDHSEC[PPa]MK[762]	2	b	1	3	10.1	GAS1-N95TT	0	FALSE	0	0.99	FALSE	1
787	334.176	10.1	GAS1-N95TT		1	VYAINTTLDHSECMK	VYAINTTLDHSEC[PPa]MK[787]	2	b	1	3	10.1	GAS1-N95TT	0	FALSE	0	0.99	FALSE	1
812	334.176	10.1	GAS1-N95TT		1	VYAINTTLDHSECMK	VYAINTTLDHSEC[PPa]MK[812]	2	b	1	3	10.1	GAS1-N95TT	0	FALSE	0	0.99	FALSE	1
837	334.176	10.1	GAS1-N95TT		1	VYAINTTLDHSECMK	VYAINTTLDHSEC[PPa]MK[837]	2	b	1	3	10.1	GAS1-N95TT	0	FALSE	0	0.99	FALSE	1
862	334.176	10.1	GAS1-N95TT		1	VYAINTTLDHSECMK	VYAINTTLDHSEC[PPa]MK[862]	2	b	1	3	10.1	GAS1-N95TT	0	FALSE	0	0.99	FALSE	1
887	334.176	10.1	GAS1-N95TT		1	VYAINTTLDHSECMK	VYAINTTLDHSEC[PPa]MK[887]	2	b	1	3	10.1	GAS1-N95TT	0	FALSE	0	0.99	FALSE	1
912	334.176	10.1	GAS1-N95TT		1	VYAINTTLDHSECMK	VYAINTTLDHSEC[PPa]MK[912]	2	b	1	3	10.1	GAS1-N95TT	0	FALSE	0	0.99	FALSE	1
937	334.176	10.1	GAS1-N95TT		1	VYAINTTLDHSECMK	VYAINTTLDHSEC[PPa]MK[937]	2	b	1	3	10.1	GAS1-N95TT	0	FALSE	0	0.99	FALSE	1
962	334.176	10.1	GAS1-N95TT		1	VYAINTTLDHSECMK	VYAINTTLDHSEC[PPa]MK[962]	2	b	1	3	10.1	GAS1-N95TT	0	FALSE	0	0.99	FALSE	1
987	334.176	10.1	GAS1-N95TT		1	VYAINTTLDHSECMK	VYAINTTLDHSEC[PPa]MK[987]	2	b	1	3	10.1	GAS1-N95TT	0	FALSE	0	0.99	FALSE	1
1012	334.176	10.1	GAS1-N95TT		1	VYAINTTLDHSECMK	VYAINTTLDHSEC[PPa]MK[1012]	2	b	1	3	10.1	GAS1-N95TT	0	FALSE	0	0.99	FALSE	1
1037	334.176	10.1	GAS1-N95TT		1	VYAINTTLDHSECMK	VYAINTTLDHSEC[PPa]MK[1037]	2	b	1	3	10.1	GAS1-N95TT	0	FALSE	0	0.99	FALSE	1
1062	334.176	10.1	GAS1-N95TT		1	VYAINTTLDHSECMK	VYAINTTLDHSEC[PPa]MK[1062]	2	b	1	3	10.1	GAS1-N95TT	0	FALSE	0	0.99	FALSE	1
1087	334.176	10.1	GAS1-N95TT		1	VYAINTTLDHSECMK	VYAINTTLDHSEC[PPa]MK[1087]	2	b	1	3	10.1	GAS1-N95TT	0	FALSE	0	0.99	FALSE	1
1112	334.176	10.1	GAS1-N95TT		1	VYAINTTLDHSECMK	VYAINTTLDHSEC[PPa]MK[1112]	2	b	1	3	10.1	GAS1-N95TT	0	FALSE	0	0.99	FALSE	1
1137	334.176	10.1	GAS1-N95TT		1	VYAINTTLDHSECMK	VYAINTTLDHSEC[PPa]MK[1137]	2	b	1	3	10.1	GAS1-N95TT	0	FALSE	0	0.99	FALSE	1
1162	334.176	10.1	GAS1-N95TT		1	VYAINTTLDHSECMK	VYAINTTLDHSEC[PPa]MK[1162]	2	b	1	3	10.1	GAS1-N95TT	0	FALSE	0	0.99	FALSE	1
1187	334.176	10.1	GAS1-N95TT		1	VYAINTTLDHSECMK	VYAINTTLDHSEC[PPa]MK[1187]	2	b	1	3	10.1	GAS1-N95TT	0	FALSE	0	0.99	FALSE	1
1212	334.176	10.1	GAS1-N95TT		1	VYAINTTLDHSECMK	VYAINTTLDHSEC[PPa]MK[1212]	2	b	1	3	10.1	GAS1-N95TT	0	FALSE	0	0.99	FALSE	1
1237	334.176	10.1	GAS1-N95TT		1	VYAINTTLDHSECMK	VYAINTTLDHSEC[PPa]MK[1237]	2	b	1	3	10.1	GAS1-N95TT	0	FALSE	0	0.99	FALSE	1
412.5	452.2	10.1	GAS1-N95TT		1	VYAINTTLDHSECMK	VYAINTTLDHSEC[PPa]MK[412]	2	y	1	3	10.1	GAS1-N95TT	0	FALSE	0	0.99	FALSE	1
437	452.2	10.1	GAS1-N95TT		1	VYAINTTLDHSECMK	VYAINTTLDHSEC[PPa]MK[437]	2	y	1	3	10.1	GAS1-N95TT	0	FALSE	0	0.99	FALSE	1
462	452.2	10.1	GAS1-N95TT		1	VYAINTTLDHSECMK	VYAINTTLDHSEC[PPa]MK[462]	2	y	1	3	10.1	GAS1-N95TT	0	FALSE	0	0.99	FALSE	1
487	452.2	10.1	GAS1-N95TT		1	VYAINTTLDHSECMK	VYAINTTLDHSEC[PPa]MK[487]	2	y	1	3	10.1	GAS1-N95TT	0	FALSE	0	0.99	FALSE	1
512	452.2	10.1	GAS1-N95TT		1	VYAINTTLDHSECMK	VYAINTTLDHSEC[PPa]MK[512]	2	y	1	3	10.1	GAS1-N95TT	0	FALSE	0	0.99	FALSE	1
537	452.2	10.1	GAS1-N95TT		1	VYAINTTLDHSECMK	VYAINTTLDHSEC[PPa]MK[537]	2	y	1	3	10.1	GAS1-N95TT	0	FALSE	0	0.99	FALSE	1
562	452.2	10.1	GAS1-N95TT		1	VYAINTTLDHSECMK	VYAINTTLDHSEC[PPa]MK[562]	2	y	1	3	10.1	GAS1-N95TT	0	FALSE	0	0.99	FALSE	1
587	452.2	10.61	GAS1-N95TT		1	VYAINTTLDHSECMK	VYAINTTLDHSEC[PPa]MK[587]	2	y	1	3	10.61	GAS1-N95TT	0	FALSE	0	0.99	FALSE	1
612	452.2	10.61	GAS1-N95TT		1	VYAINTTLDHSECMK	VYAINTTLDHSEC[PPa]MK[612]	2	y	1	3	10.61	GAS1-N95TT	0	FALSE	0	0.99	FALSE	1
637	452.2	10.1	GAS1-N95TT		1	VYAINTTLDHSECMK	VYAINTTLDHSEC[PPa]MK[637]	2	y	1	3	10.1	GAS1-N95TT	0	FALSE	0	0.99	FALSE	1
662	452.2	10.1	GAS1-N95TT		1	VYAINTTLDHSECMK	VYAINTTLDHSEC[PPa]MK[662]	2	y	1	3	10.1	GAS1-N95TT	0	FALSE	0	0.99	FALSE	1
687	452.2	10.1	GAS1-N95TT		1	VYAINTTLDHSECMK	VYAINTTLDHSEC[PPa]MK[687]	2	y	1	3	10.1	GAS1-N95TT	0	FALSE	0	0.99	FALSE	1
712	452.2	10.1	GAS1-N95TT		1	VYAINTTLDHSECMK	VYAINTTLDHSEC[PPa]MK[712]	2	y	1	3	10.1	GAS1-N95TT	0	FALSE	0	0.99	FALSE	1
737	452.2	10.1	GAS1-N95TT		1	VYAINTTLDHSECMK	VYAINTTLDHSEC[PPa]MK[737]	2	y	1	3	10.1	GAS1-N95TT	0	FALSE	0	0.99	FALSE	1
762	452.2	10.1	GAS1-N95TT		1	VYAINTTLDHSECMK	VYAINTTLDHSEC[PPa]MK[762]	2	y	1	3	10.1	GAS1-N95TT	0	FALSE	0	0.99	FALSE	1
787	452.2	10.1	GAS1-N95TT		1	VYAINTTLDHSECMK	VYAINTTLDHSEC[PPa]MK[787]	2	y	1	3	10.1	GAS1-N95TT	0	FALSE	0	0.99	FALSE	1
812	452.2	10.1	GAS1-N95TT		1	VYAINTTLDHSECMK	VYAINTTLDHSEC[PPa]MK[812]	2	y	1	3	10.1	GAS1-N95TT	0	FALSE	0	0.99	FALSE	1
837	452.2	10.1	GAS1-N95TT		1	VYAINTTLDHSECMK	VYAINTTLDHSEC[PPa]MK[837]	2	y	1	3	10.1	GAS1-N95TT	0	FALSE	0	0.99	FALSE	1
862	452.2	10.1	GAS1-N95TT		1	VYAINTTLDHSECMK	VYAINTTLDHSEC[PPa]MK[862]	2	y	1	3	10.1	GAS1-N95TT	0	FALSE	0	0.99	FALSE	1
887	452.2	10.1	GAS1-N95TT		1	VYAINTTLDHSECMK	VYAINTTLDHSEC[PPa]MK[887]	2	y	1	3	10.1	GAS1-N95TT	0	FALSE	0	0.99	FALSE	1
912	452.2	10.1	GAS1-N95TT		1	VYAINTTLDHSECMK	VYAINTTLDHSEC[PPa]MK[912]	2	y	1	3	10.1	GAS1-N95TT	0	FALSE	0	0.99	FALSE	1
937	452.2	10.1	GAS1-N95TT		1	VYAINTTLDHSECMK	VYAINTTLDHSEC[PPa]MK[937]	2	y	1	3	10.1	GAS1-N95TT	0	FALSE	0	0.99	FALSE	1
962	452.2	10.1	GAS1-N95TT		1	VYAINTTLDHSECMK	VYAINTTLDHSEC[PPa]MK[962]	2	y	1	3	10.1	GAS1-N95TT	0	FALSE	0	0.99	FALSE	1
987	452.2	10.1	GAS1-N95TT		1	VYAINTTLDHSECMK	VYAINTTLDHSEC[PPa]MK[987]	2	y	1	3	10.1	GAS1-N95TT	0	FALSE	0	0.99	FALSE	1
1012	452.2	10.1	GAS1-N95TT		1	VYAINTTLDHSECMK	VYAINTTLDHSEC[PPa]MK[1012]	2	y	1	3	10.1	GAS1-N95TT	0	FALSE	0	0.99	FALSE	1
1037	452.2	10.1	GAS1-N95TT		1	VYAINTTLDHSECMK	VYAINTTLDHSEC[PPa]MK[1037]	2	y	1	3	10.1	GAS1-N95TT	0	FALSE	0	0.99	FALSE	1
1062	452.2	10.1	GAS1-N95TT		1	VYAINTTLDHSECMK	VYAINTTLDHSEC[PPa]MK[1062]	2	y	1	3	10.1	GAS1-N95TT	0	FALSE	0	0.99	FALSE	1
1087	452.2	10.1	GAS1-N95TT		1	VYAINTTLDHSECMK	VYAINTTLDHSEC[PPa]MK[1087]	2	y	1	3	10.1	GAS1-N95TT	0	FALSE	0	0.99	FALSE	1
1112	452.2	10.1	GAS1-N95TT		1	VYAINTTLDHSECMK	VYAINTTLDHSEC[PPa]MK[1112]	2	y	1	3	10.1	GAS1-N95TT	0	FALSE	0	0.99	FALSE	1
1137	452.2	10.1	GAS1-N95TT		1	VYAINTTLDHSECMK	VYAINTTLDHSEC[PPa]MK[1137]	2	y	1	3	10.1	GAS1-N95TT	0	FALSE	0	0.99	FALSE	1
1162	452.2	10.1	GAS1-N95TT		1	VYAINTTLDHSECMK	VYAINTTLDHSEC[PPa]MK[1162]	2	y	1	3	10.1	GAS1-N95TT	0	FALSE	0	0.99	FALSE	1
1187	452.2	10.1	GAS1-N95TT		1	VYAINTTLDHSECMK	VYAINTTLDHSEC[PPa]MK[1187]	2	y	1	3	10.1	GAS1-N95TT	0	FALSE	0	0.99	FALSE	1
1212	452.2	10.1	GAS1-N95TT		1	VYAINTTLDHSECMK	VYAINTTLDHSEC[PPa]MK[1212]	2	y	1	3	10.1	GAS1-N95TT	0	FALSE	0	0.99	FALSE	1
1237	452.2	10.1	GAS1-N95TT		1	VYAINTTLDHSECMK	VYAINTTLDHSEC[PPa]MK[1237]	2	y	1	3	10.1	GAS1-N95TT	0	FALSE	0	0.99	FALSE	1
412.5	167.592	10.1	GAS1-N95TT		1	VYAINTTLDHSECMK	VYAINTTLDHSEC[PPa]MK[412]	2	b	2	3	10.1	GAS1-N95TT	0	FALSE	0	0.99	FALSE	1
437	167.592	10.1	GAS1-N95TT		1	VYAINTTLDHSECMK	VYAINTTLDHSEC[PPa]MK[437]	2	b	2	3	10.1	GAS1-N95TT	0	FALSE	0	0.99	FALSE	1
462	167.592	10.1	GAS1-N95TT		1	VYAINTTLDHSECMK	VYAINTTLDHSEC[PPa]MK[462]	2	b	2	3	10.1	GAS1-N95TT	0	FALSE	0	0.99	FALSE	1
487	167.592	10.1	GAS1-N95TT		1	VYAINTTLDHSECMK	VYAINTTLDHSEC[PPa]MK[487]	2	b	2	3	10.1	GAS1-N95TT	0	FALSE	0	0.99	FALSE	1
512	167.592	10.1	GAS1-N95TT		1	VYAINTTLDHSECMK	VYAINTTLDHSEC[PPa]MK[512]	2	b	2	3	10.1	GAS1-N95TT	0	FALSE	0	0.99	FALSE	1
537	167.592	10.1	GAS1-N95TT		1	VYAINTTLDHSECMK	VYAINTTLDHSEC[PPa]MK[537]	2	b	2	3	10.1	GAS1-N95TT	0	FALSE	0	0.99	FALSE	1
562	167.592	10.1	GAS1-N95TT		1	VYAINTTLDHSECMK	VYAINTTLDHSEC[PPa]MK[562]	2	b	2	3	10.1	GAS1-N95TT	0	FALSE	0	0.99	FALSE	1
587	167.592	10.61	GAS1-N95TT		1	VYAINTTLDHSECMK	VYAINTTLDHSEC[PPa]MK[587]	2	b	2	3	10.61	GAS1-N95TT	0	FALSE	0	0.99	FALSE	1
612	167.592	10.61	GAS1-N95TT		1	VYAINTTLDHSECMK	VYAINTTLDHSEC[PPa]MK[612]	2	b	2	3	10.61	GAS1-N95TT	0	FALSE	0	0.99	FALSE	1
637	167.592	10.1	GAS1-N95TT		1	VYAINTTLDHSECMK	VYAINTTLDHSEC[PPa]MK[637]	2	b	2	3	10.1	GAS1-N95TT	0	FALSE	0	0.99	FALSE	1
662	167.592	10.1	GAS1-N95TT		1	VYAINTTLDHSECMK	VYAINTTLDHSEC[PPa]MK[662]	2	b	2	3	10.1	GAS1-N95TT	0	FALSE	0	0.99	FALSE	1
687	167.592	10.1	GAS1-N95TT		1	VYAINTTLDHSECMK	VYAINTTLDHSEC[PPa]MK[687]	2	b	2	3	10.1	GAS1-N95TT	0	FALSE	0	0.99	FALSE	1
712	167.592	10.1	GAS1-N95TT		1	VYAINTTLDHSECMK	VYAINTTLDHSEC[PPa]MK[712]	2	b	2	3	10.1	GAS1-N95TT	0	FALSE	0	0.99	FALSE	1
737	167.592	10.1	GAS1-N95TT		1	VYAINTTLDHSECMK	VYAINTTLDHSEC[PPa]MK[737]	2	b	2	3	10.1	GAS1-N95TT	0	FALSE	0	0.99	FALSE	1
762	167.592	10.1	GAS1-N95TT		1	VYAINTTLDHSECMK	VYAINTTLDHSEC[PPa]MK[762]	2	b	2	3	10.1	GAS1-N95TT	0	FALSE	0	0.99	FALSE	1
787	167.592	10.1	GAS1-N95TT		1	VYAINTTLDHSECMK	VYAINTTLDHSEC[PPa]MK[787]	2	b	2	3	10.1	GAS1-N95TT	0	FALSE	0	0.99	FALSE	1
812	167.592	10.1	GAS1-N95TT		1	VYAINTTLDHSECMK	VYAINTTLDHSEC[PPa]MK[812]	2	b	2	3	10.1	GAS1-N95TT	0	FALSE	0	0.99	FALSE	1
837	167.592	10.1	GAS1-N95TT		1	VYAINTTLDHSECMK	VYAINTTLDHSEC[PPa]MK[837]	2	b	2	3	10.1	GAS1-N95TT	0	FALSE	0	0.99	FALSE	1
862	167.592	10.1	GAS1-N95TT		1	VYAINTTLDHSECMK	VYAINTTLDHSEC[PPa]MK[862]	2	b	2	3	10.1	GAS1-N95TT	0	FALSE	0	0.99	FALSE	1
887	167.592	10.1	GAS1-N95TT		1	VYAINTTLDHSECMK	VYAINTTLDHSEC[PPa]MK[887]	2	b	2	3	10.1	GAS1-N95TT	0	FALSE	0	0.99	FALSE	1
912	167.592	10.1	GAS1-N95TT		1	VYAINTTLDHSECMK	VYAINTTLDHSEC[PPa]MK[912]	2	b	2	3	10.1	GAS1-N95TT	0	FALSE	0	0.99	FALSE	1
937	167.592	10.1	GAS1-N95TT		1	VYAINTTLDHSECMK	VYAINTTLDHSEC[PPa]MK[937]	2	b	2	3	10.1	GAS1-N95TT	0	FALSE	0	0.99	FALSE	1
962	167.592	10.1	GAS1-N95TT		1	VYAINTTLDHSECMK	VYAINTTLDHSEC[PPa]MK[962]	2	b	2	3	10.1	GAS1-N95TT	0	FALSE	0	0.99	FALSE	1
987	167.592	10.1	GAS1-N95TT		1	VYAINTTLDHSECMK	VYAINTTLDHSEC[PPa]MK[987]	2	b	2	3	10.1	GAS1-N95TT	0	FALSE	0	0.99	FALSE	1
1012	167.592	10.1	GAS1-N95TT		1	VYAINTTLDHSECMK	VYAINTTLDHSEC[PPa]MK[1012]	2	b	2	3	10.1	GAS1-N95TT	0	FALSE	0	0.99	FALSE	1
1037	167.592	10.1	GAS1-N95TT		1	VYAINTTLDHSECMK	VYAINTTLDHSEC[PPa]MK[1037]	2	b	2	3	10.1	GAS1-N95TT	0	FALSE	0	0.99	FALSE	1
1062	167.592	10.1	GAS1-N95TT		1	VYAINTTLDHSECMK	VYAINTTLDHSEC[PPa]MK[1062]	2	b	2	3	10.1	GAS1-N95TT	0	FALSE	0	0.99	FALSE	1
1087	167.592	10.1	GAS1-N95TT		1	VYAINTTLDHSECMK	VYAINTTLDHSEC[PPa]MK[1087]	2	b	2	3	10.1	GAS1-N95TT	0	FALSE	0	0.99	FALSE	1
1112	167.592	10.1	GAS1-N95TT		1	VYAINTTLDHSECMK	VYAINTTLDHSEC[PPa]MK[1112]	2	b	2	3	10.1	GAS1-N95TT	0	FALSE	0	0.99	FALSE	1
1137	167.592	10.1	GAS1-N95TT		1	VYAINTTLDHSECMK	VYAINTTLDHSEC[PPa]MK[1137]	2	b	2	3	10.1	GAS1-N95TT	0	FALSE	0	0.99	FALSE	1
1162	167.592	10.1	GAS1-N95TT		1	VYAINTTLDHSECMK	VYAINTTLDHSEC[PPa]MK[1162]	2	b	2	3	10.1	GAS1-N95TT	0	FALSE	0	0.99	FALSE	1
1187	167.592	10.1	GAS1-N95TT		1	VYAINTTLDHSECMK	VYAINTTLDHSEC[PPa]MK[1187]	2	b	2	3	10.1	GAS1-N95TT	0	FALSE	0	0.99	FALSE	1
1212	167.592	10.1	GAS1-N95TT		1	VYAINTTLDHSECMK	VYAINTTLDHSEC[PPa]MK[1212]	2	b	2	3	10.1	GAS1-N95TT	0	FALSE	0	0.99	FALSE	1
1237	167.592	10.1	GAS1-N95TT		1	VYAINTTLDHSECMK	VYAINTTLDHSEC[PPa]MK[1237]	2	b	2	3	10.1	GAS1-N95TT	0	FALSE	0	0.99	FALSE	1
412.5	226.603	10.1	GAS1-N95TT		1	VYAINTTLDHSECMK	VYAINTTLDHSEC[PPa]MK[412]	2	y	2	3	10.1	GAS1-N95TT	0	FALSE	0	0.99	FALSE	1
437	226.603	10.1	GAS1-N95TT		1	VYAINTTLDHSECMK	VYAINTTLDHSEC[PPa]MK[437]	2	y	2	3	10.1	GAS1-N95TT	0	FALSE	0	0.99	FALSE	1
462	226.603	10.1	GAS1-N95TT		1	VYAINTTLDHSECMK	VYAINTTLDHSEC[PPa]MK[462]	2	y	2	3	10.1	GAS1-N95TT	0	FALSE	0	0.99	FALSE	1
487	226.603	10.1	GAS1-N95TT		1	VYAINTTLDHSECMK	VYAINTTLDHSEC[PPa]MK[487]	2	y	2	3	10.1	GAS1-N95TT	0	FALSE	0	0.99	FALSE	1
512	226.603	10.1	GAS1-N95TT		1	VYAINTTLDHSECMK	VYAINTTLDHSEC[PPa]MK[512]	2	y	2	3	10.1	GAS1-N95TT	0	FALSE	0	0.99	FALSE	1
537	226.603	10.1	GAS1-N95TT		1	VYAINTTLDHSECMK	VYAINTTLDHSEC[PPa]MK[537]	2	y	2	3	10.1	GAS1-N95TT	0	FALSE	0	0.99	FALSE	1
562	226.603	10.1	GAS1-N95TT		1	VYAINTTLDHSECMK	VYAINTTLDHSEC[PPa]MK[562]	2	y	2	3	10.1	GAS1-N95TT	0	FALSE	0	0.99	FALSE	1
587	226.603	10.61	GAS1-N95TT		1	VYAINTTLDHSECMK	VYAINTTLDHSEC[PPa]MK[587]	2	y	2	3	10.61	GAS1-N95TT	0	FALSE	0	0.99	FALSE	1
612	226.603	10.61	GAS1-N95TT		1	VYAINTTLDHSECMK	VYAINTTLDHSEC[PPa]MK[612]	2	y	2	3	10.61	GAS1-N95TT	0	FALSE	0	0.99	FALSE	1
637	226.603	10.1	GAS1-N95TT		1	VYAINTTLDHSECMK	VYAINTTLDHSEC[PPa]MK[637]	2	y	2	3	10.1	GAS1-N95TT	0	FALSE	0	0.99	FALSE	1
662	226.603	10.1	GAS1-N95TT		1	VYAINTTLDHSECMK	VYAINTTLDHSEC[PPa]MK[662]	2	y	2	3	10.1	GAS1-N95TT	0	FALSE	0	0.99	FALSE	1
687	226.603	10.1	GAS1-N95TT		1	VYAINTTLDHSECMK	VYAINTTLDHSEC[PPa]MK[687]	2	y	2	3	10.1	GAS1-N95TT	0	FALSE	0	0.99	FALSE	1
712	226.603	10.1	GAS1-N95TT		1	VYAINTTLDHSECMK	VYAINTTLDHSEC[PPa]MK[712]	2	y	2	3	10.1	GAS1-N95TT	0	FALSE	0	0.99	FALSE	1
737	226.603	10.1	GAS1-N95TT		1	VYAINTTLDHSECMK	VYAINTTLDHSEC[PPa]MK[737]	2	y	2	3	10.1	GAS1-N95TT	0	FALSE	0	0.99	FALSE	1
762	226.603	10.1	GAS1-N95TT		1	VYAINTTLDHSECMK	VYAINTTLDHSEC[PPa]MK[762]	2	y	2	3	10.1	GAS1-N95TT	0	FALSE	0	0.99	FALSE	1
787	226.603	10.1	GAS1-N95TT		1	VYAINTTLDHSECMK	VYAINTTLDHSEC[PPa]MK[787]	2	y	2	3	10.1	GAS1-N95TT	0	FALSE	0	0.99	FALSE	1
812	226.603	10.1	GAS1-N95TT		1	VYAINTTLDHSECMK	VYAINTTLDHSEC[PPa]MK[812]	2	y	2	3	10.1	GAS1-N95TT	0	FALSE	0	0.99	FALSE	1
837	226.603	10.1	GAS1-N95TT		1	VYAINTTLDHSECMK	VYAINTTLDHSEC[PPa]MK[837]	2	y	2	3	10.1	GAS1-N95TT	0	FALSE	0	0.99	FALSE	1
862	226.603	10.1	GAS1-N95TT		1	VYAINTTLDHSECMK	VYAINTTLDHSEC[PPa]MK[862]	2	y	2	3	10.1	GAS1-N95TT	0	FALSE	0	0.99	FALSE	1
887	226.603	10.1	GAS1-N95TT		1	VYAINTTLDHSECMK	VYAINTTLDHSEC[PPa]MK[887]	2	y	2	3	10.1	GAS1-N95TT	0	FALSE	0	0.99	FALSE	1
912	226.603	10.1	GAS1-N95TT		1	VYAINTTLDHSECMK	VYAINTTLDHSEC[PPa]MK[912]	2	y	2	3	10.1	GAS1-N95TT	0	FALSE	0	0.99	FALSE	1
937	226.603	10.1	GAS1-N95TT		1	VYAINTTLDHSECMK	VYAINTTLDHSEC[PPa]MK[937]	2	y	2	3	10.1	GAS1-N95TT	0	FALSE	0	0.99	FALSE	1
962	226.603	10.1	GAS1-N95TT		1	VYAINTTLDHSECMK	VYAINTTLDHSEC[PPa]MK[962]	2	y	2	3	10.1	GAS1-N95TT	0	FALSE	0	0.99	FALSE	1
987	226.603	10.1	GAS1-N95TT		1	VYAINTTLDHSECMK	VYAINTTLDHSEC[PPa]MK[987]	2	y	2	3	10.1	GAS1-N95TT	0	FALSE	0	0.99	FALSE	1
1012	226.603	10.1	GAS1-N95TT		1	VYAINTTLDHSECMK	VYAINTTLDHSEC[PPa]MK[1012]	2	y	2	3	10.1	GAS1-N95TT	0	FALSE	0	0.99	FALSE	1
1037	226.603	10.1	GAS1-N95TT		1	VYAINTTLDHSECMK	VYAINTTLDHSEC[PPa]MK[1037]	2	y	2	3	10.1	GAS1-N95TT	0	FALSE	0	0.99	FALSE	1
1062	226.603	10.1	GAS1-N95TT		1	VYAINTTLDHSECMK	VYAINTTLDHSEC[PPa]MK[1062]	2	y	2	3	10.1	GAS1-N95TT	0	FALSE	0	0.99	FALSE	1
1087	226.603	10.1	GAS1-N95TT		1	VYAINTTLDHSECMK	VYAINTTLDHSEC[PPa]MK[1087]	2	y	2	3	10.1	GAS1-N95TT	0	FALSE	0	0.99	FALSE	1
1112	226.603	10.1	GAS1-N95TT		1	VYAINTTLDHSECMK	VYAINTTLDHSEC[PPa]MK[1112]	2	y	2	3	10.1	GAS1-N95TT	0	FALSE	0	0.99	FALSE	1
1137	226.603	10.1	GAS1-N95TT		1	VYAINTTLDHSECMK	VYAINTTLDHSEC[PPa]MK[1137]	2	y	2	3	10.1	GAS1-N95TT	0	FALSE	0	0.99	FALSE	1
1162	226.603	10.1	GAS1-N95TT		1	VYAINTTLDHSECMK	VYAINTTLDHSEC[PPa]MK[1162]	2	y	2	3	10.1	GAS1-N95TT	0	FALSE	0	0.99	FALSE	1
1187	226.603	10.1	GAS1-N95TT		1	VYAINTTLDHSECMK	VYAINTTLDHSEC[PPa]MK[1187]	2	y	2	3	10.1	GAS1-N95TT	0	FALSE	0	0.99	FALSE	1
1212	226.603	10.1	GAS1-N95TT		1	VYAINTTLDHSECMK	VYAINTTLDHSEC[PPa]MK[1212]	2	y	2	3	10.1	GAS1-N95TT	0	FALSE	0	0.99	FALSE	1
1237	226.603	10.1	GAS1-N95TT		1	VYAINTTLDHSECMK	VYAINTTLDHSEC[PPa]MK[1237]	2	y	2	3	10.1	GAS1-N95TT	0	FALSE	0	0.99	FALSE	1
412.5	447.26	10.1	GAS1-N95TT		1	VYAINTTLDHSECMK	VYAINTTLDHSEC[PPa]MK[412]	2	b	1	4	10.1	GAS1-N95TT	0	FALSE	0	0.99	FALSE	1
437	447.26	10.1	GAS1-N95TT		1	VYAINTTLDHSECMK	VYAINTTLDHSEC[PPa]MK[437]	2	b	1	4	10.1	GAS1-N95TT	0	FALSE	0	0.99	FALSE	1
462	447.26	10.1	GAS1-N95TT		1	VYAINTTLDHSECMK	VYAINTTLDHSEC[PPa]MK[462]	2	b	1	4	10.1	GAS1-N95TT	0	FALSE	0	0.99	FALSE	1
487	447.26	10.1	GAS1-N95TT		1	VYAINTTLDHSECMK	VYAINTTLDHSEC[PPa]MK[487]	2	b	1	4	10.1	GAS1-N95TT	0	FALSE	0	0.99	FALSE	1
512	447.26	10.1	GAS1-N95TT		1	VYAINTTLDHSECMK	VYAINTTLDHSEC[PPa]MK[512]	2	b	1	4	10.1	GAS1-N95TT	0	FALSE	0	0.99	FALSE	1
537	447.26	10.1	GAS1-N95TT		1	VYAINTTLDHSECMK	VYAINTTLDHSEC[PPa]MK[537]	2	b	1	4	10.1	GAS1-N95TT	0	FALSE	0	0.99	FALSE	1
562	447.26	10.1	GAS1-N95TT		1	VYAINTTLDHSECMK	VYAINTTLDHSEC[PPa]MK[562]	2	b	1	4	10.1	GAS1-N95TT	0	FALSE	0	0.99	FALSE	1
587	447.26	10.61	GAS1-N95TT		1	VYAINTTLDHSECMK	VYAINTTLDHSEC[PPa]MK[587]	2	b	1	4	10.61	GAS1-N95TT	0	FALSE	0	0.99	FALSE	1
612	447.26	10.61	GAS1-N95TT		1	VYAINTTLDHSECMK	VYAINTTLDHSEC[PPa]MK[612]	2	b	1	4	10.61	GAS1-N95TT	0	FALSE	0	0.99	FALSE	1
637	447.26	10.1	GAS1-N95TT		1	VYAINTTLDHSECMK	VYAINTTLDHSEC[PPa]MK[637]	2	b	1	4	10.1	GAS1-N95TT	0	FALSE	0	0.99	FALSE	1
662	447.26	10.1	GAS1-N95TT		1	VYAINTTLDHSECMK	VYAINTTLDHSEC[PPa]MK[662]	2	b	1	4	10.1	GAS1-N95TT	0	FALSE	0	0.99	FALSE	1
687	447.26	10.1	GAS1-N95TT		1	VYAINTTLDHSECMK	VYAINTTLDHSEC[PPa]MK[687]	2	b	1	4	10.1	GAS1-N95TT	0	FALSE	0	0.99	FALSE	1
712	447.26	10.1	GAS1-N95TT		1	VYAINTTLDHSECMK	VYAINTTLDHSEC[PPa]MK[712]	2	b	1	4	10.1	GAS1-N95TT	0	FALSE	0	0.99	FALSE	1
737	447.26	10.1	GAS1-N95TT		1	VYAINTTLDHSECMK	VYAINTTLDHSEC[PPa]MK[737]	2	b	1	4	10.1	GAS1-N95TT	0	FALSE	0	0.99	FALSE	1
762	447.26	10.1	GAS1-N95TT		1	VYAINTTLDHSECMK	VYAINTTLDHSEC[PPa]MK[762]	2	b	1	4	10.1	GAS1-N95TT	0	FALSE	0	0.99	FALSE	1
787	447.26	10.1	GAS1-N95TT		1	VYAINTTLDHSECMK	VYAINTTLDHSEC[PPa]MK[787]	2	b	1	4	10.1	GAS1-N95TT	0	FALSE	0	0.99	FALSE	1
812	447.26	10.1	GAS1-N95TT		1	VYAINTTLDHSECMK	VYAINTTLDHSEC[PPa]MK[812]	2	b	1	4	10.1	GAS1-N95TT	0	FALSE	0	0.99	FALSE	1
837	447.26	10.1	GAS1-N95TT		1	VYAINTTLDHSECMK	VYAINTTLDHSEC[PPa]MK[837]	2	b	1	4	10.1	GAS1-N95TT	0	FALSE	0	0.99	FALSE	1
862	447.26	10.1	GAS1-N95TT		1	VYAINTTLDHSECMK	VYAINTTLDHSEC[PPa]MK[862]	2	b	1	4	10.1	GAS1-N95TT	0	FALSE	0	0.99	FALSE	1
887	447.26	10.1	GAS1-N95TT		1	VYAINTTLDHSECMK	VYAINTTLDHSEC[PPa]MK[887]	2	b	1	4	10.1	GAS1-N95TT	0	FALSE	0	0.99	FALSE	1
912	447.26	10.1	GAS1-N95TT		1	VYAINTTLDHSECMK	VYAINTTLDHSEC[PPa]MK[912]	2	b	1	4	10.1	GAS1-N95TT	0	FALSE	0	0.99	FALSE	1
937	447.26	10.1	GAS1-N95TT		1	VYAINTTLDHSECMK	VYAINTTLDHSEC[PPa]MK[937]	2	b	1	4	10.1	GAS1-N95TT	0	FALSE	0	0.99	FALSE	1
962	447.26	10.1	GAS1-N95TT		1	VYAINTTLDHSECMK	VYAINTTLDHSEC[PPa]MK[962]	2	b	1	4	10.1	GAS1-N95TT	0	FALSE	0	0.99	FALSE	1
987	447.26	10.1	GAS1-N95TT		1	VYAINTTLDHSECMK	VYAINTTLDHSEC[PPa]MK[987]	2	b	1	4	10.1	GAS1-N95TT	0	FALSE	0	0.99	FALSE	1
1012	447.26	10.1	GAS1-N95TT		1	VYAINTTLDHSECMK	VYAINTTLDHSEC[PPa]MK[1012]	2	b	1	4	10.1	GAS1-N95TT	0	FALSE	0	0.99	FALSE	1
1037	447.26	10.1	GAS1-N95TT		1	VYAINTTLDHSECMK	VYAINTTLDHSEC[PPa]MK[1037]	2	b	1	4	10.1	GAS1-N95TT	0	FALSE	0	0.99	FALSE	1
1062	447.26	10.1	GAS1-N95TT		1	VYAINTTLDHSECMK	VYAINTTLDHSEC[PPa]MK[1062]	2	b	1	4	10.1	GAS1-N95TT	0	FALSE	0	0.99	FALSE	1
1087	447.26	10.1	GAS1-N95TT		1	VYAINTTLDHSECMK	VYAINTTLDHSEC[PPa]MK[1087]	2	b	1	4	10.1	GAS1-N95TT	0	FALSE	0	0.99	FALSE	1
1112	447.26	10.1	GAS1-N95TT		1	VYAINTTLDHSECMK	VYAINTTLDHSEC[PPa]MK[1112]	2	b	1	4	10.1	GAS1-N95TT	0	FALSE	0	0.99	FALSE	1
1137	447.26	10.1	GAS1-N95TT		1	VYAINTTLDHSECMK	VYAINTTLDHSEC[PPa]MK[1137]	2	b	1	4	10.1	GAS1-N95TT	0	FALSE	0	0.99	FALSE	1
1162	447.26	10.1	GAS1-N95TT		1	VYAINTTLDHSECMK	VYAINTTLDHSEC[PPa]MK[1162]	2	b	1	4	10.1	GAS1-N95TT	0	FALSE	0	0.99	FALSE	1
1187	447.26	10.1	GAS1-N95TT		1	VYAINTTLDHSECMK	VYAINTTLDHSEC[PPa]MK[1187]	2	b	1	4	10.1	GAS1-N95TT	0	FALSE	0	0.99	FALSE	1
1212	447.26	10.1	GAS1-N95TT		1	VYAINTTLDHSECMK	VYAINTTLDHSEC[PPa]MK[1212]	2	b	1	4	10.1	GAS1-N95TT	0	FALSE	0	0.99	FALSE	1
1237	447.26	10.1	GAS1-N95TT		1	VYAINTTLDHSECMK	VYAINTTLDHSEC[PPa]MK[1237]	2	b	1	4	10.1	GAS1-N95TT	0	FALSE	0	0.99	FALSE	1
412.5	581.242	10.1	GAS1-N95TT		1	VYAINTTLDHSECMK	VYAINTTLDHSEC[PPa]MK[412]	2	y	1	4	10.1	GAS1-N95TT	0	FALSE	0	0.99	FALSE	1
437	581.242	10.1	GAS1-N95TT		1	VYAINTTLDHSECMK	VYAINTTLDHSEC[PPa]MK[437]	2	y	1	4	10.1	GAS1-N95TT	0	FALSE	0	0.99	FALSE	1
462	581.242	10.1	GAS1-N95TT		1	VYAINTTLDHSECMK	VYAINTTLDHSEC[PPa]MK[462]	2	y	1	4	10.1	GAS1-N95TT	0	FALSE	0	0.99	FALSE	1
487	581.242	10.1	GAS1-N95TT		1	VYAINTTLDHSECMK	VYAINTTLDHSEC[PPa]MK[487]	2	y	1	4	10.1	GAS1-N95TT	0	FALSE	0	0.99	FALSE	1
512	581.242	10.1	GAS1-N95TT		1	VYAINTTLDHSECMK	VYAINTTLDHSEC[PPa]MK[512]	2	y	1	4	10.1	GAS1-N95TT	0	FALSE	0	0.99	FALSE	1
537	581.242	10.1	GAS1-N95TT		1	VYAINTTLDHSECMK	VYAINTTLDHSEC[PPa]MK[537]	2	y	1	4	10.1	GAS1-N95TT	0	FALSE	0	0.99	FALSE	1
562	581.242	10.1	GAS1-N95TT		1	VYAINTTLDHSECMK	VYAINTTLDHSEC[PPa]MK[562]	2	y	1	4	10.1	GAS1-N95TT	0	FALSE	0	0.99	FALSE	1
587	581.242	10.61	GAS1-N95TT		1	VYAINTTLDHSECMK	VYAINTTLDHSEC[PPa]MK[587]	2	y	1	4	10.61	GAS1-N95TT	0	FALSE	0	0.99	FALSE	1
612	581.242	10.61	GAS1-N95TT		1	VYAINTTLDHSECMK	VYAINTTLDHSEC[PPa]MK[612]	2	y	1	4	10.61	GAS1-N95TT	0	FALSE	0	0.99	FALSE	1
637	581.242	10.1	GAS1-N95TT		1	VYAINTTLDHSECMK	VYAINTTLDHSEC[PPa]MK[637]	2	y	1	4	10.1	GAS1-N95TT	0	FALSE	0	0.99	FALSE	1
662	581.242	10.1	GAS1-N95TT		1	VYAINTTLDHSECMK	VYAINTTLDHSEC[PPa]MK[662]	2	y	1	4	10.1	GAS1-N95TT	0	FALSE	0	0.99	FALSE	1
687	581.242	10.1	GAS1-N95TT		1	VYAINTTLDHSECMK	VYAINTTLDHSEC[PPa]MK[687]	2	y	1	4	10.1	GAS1-N95TT	0	FALSE	0	0.99	FALSE	1
712	581.242	10.1	GAS1-N95TT		1	VYAINTTLDHSECMK	VYAINTTLDHSEC[PPa]MK[712]	2	y	1	4	10.1	GAS1-N95TT	0	FALSE	0	0.99	FALSE	1
737	581.242	10.1	GAS1-N95TT		1	VYAINTTLDHSECMK	VYAINTTLDHSEC[PPa]MK[737]	2	y	1	4	10.1	GAS1-N95TT	0	FALSE	0	0.99	FALSE	1
762	581.242	10.1	GAS1-N95TT		1	VYAINTTLDHSECMK	VYAINTTLDHSEC[PPa]MK[762]	2	y	1	4	10.1	GAS1-N95TT	0	FALSE	0	0.99	FALSE	1
787	581.242	10.1	GAS1-N95TT		1	VYAINTTLDHSECMK	VYAINTTLDHSEC[PPa]MK[787]	2	y	1	4	10.1	GAS1-N95TT	0	FALSE	0	0.99	FALSE	1
812	581.242	10.1	GAS1-N95TT		1	VYAINTTLDHSECMK	VYAINTTLDHSEC[PPa]MK[812]	2	y	1	4	10.1	GAS1-N95TT	0	FALSE	0	0.99	FALSE	1
837	581.242	10.1	GAS1-N95TT		1	VYAINTTLDHSECMK	VYAINTTLDHSEC[PPa]MK[837]	2	y	1	4	10.1	GAS1-N95TT	0	FALSE	0	0.99	FALSE	1
862	581.242	10.1	GAS1-N95TT		1	VYAINTTLDHSECMK	VYAINTTLDHSEC[PPa]MK[862]	2	y	1	4	10.1	GAS1-N95TT	0	FALSE	0	0.99	FALSE	1
887	581.242	10.1	GAS1-N95TT		1	VYAINTTLDHSECMK	VYAINTTLDHSEC[PPa]MK[887]	2	y	1	4	10.1	GAS1-N95TT	0	FALSE	0	0.99	FALSE	1
912	581.242	10.1	GAS1-N95TT		1	VYAINTTLDHSECMK	VYAINTTLDHSEC[PPa]MK[912]	2	y	1	4	10.1	GAS1-N95TT	0	FALSE	0	0.99	FALSE	1
937	581.242	10.1	GAS1-N95TT		1	VYAINTTLDHSECMK	VYAINTTLDHSEC[PPa]MK[937]	2	y	1	4	10.1	GAS1-N95TT	0	FALSE	0	0.99	FALSE	1
962	581.242	10.1	GAS1-N95TT		1	VYAINTTLDHSECMK	VYAINTTLDHSEC[PPa]MK[962]	2	y	1	4	10.1	GAS1-N95TT	0	FALSE	0	0.99	FALSE	1
987	581.242	10.1	GAS1-N95TT		1	VYAINTTLDHSECMK	VYAINTTLDHSEC[PPa]MK[987]	2	y	1	4	10.1	GAS1-N95TT	0	FALSE	0	0.99	FALSE	1
1012	581.242	10.1	GAS1-N95TT		1	VYAINTTLDHSECMK	VYAINTTLDHSEC[PPa]MK[1012]	2	y	1	4	10.1	GAS1-N95TT	0	FALSE	0	0.99	FALSE	1
1037	581.242	10.1	GAS1-N95TT		1	VYAINTTLDHSECMK	VYAINTTLDHSEC[PPa]MK[1037]	2	y	1	4	10.1	GAS1-N95TT	0	FALSE	0	0.99	FALSE	1
1062	581.242	10.1	GAS1-N95TT		1	VYAINTTLDHSECMK	VYAINTTLDHSEC[PPa]MK[1062]	2	y	1	4	10.1	GAS1-N95TT	0	FALSE	0	0.99	FALSE	1
1087	581.242	10.1	GAS1-N95TT		1	VYAINTTLDHSECMK	VYAINTTLDHSEC[PPa]MK[1087]	2	y	1	4	10.1	GAS1-N95TT	0	FALSE	0	0.99	FALSE	1
1112	581.242	10.1	GAS1-N95TT		1	VYAINTTLDHSECMK	VYAINTTLDHSEC[PPa]MK[1112]	2	y	1	4	10.1	GAS1-N95TT	0	FALSE	0	0.99	FALSE	1
1137	581.242	10.1	GAS1-N95TT		1	VYAINTTLDHSECMK	VYAINTTLDHSEC[PPa]MK[1137]	2	y	1	4	10.1	GAS1-N95TT	0	FALSE	0	0.99	FALSE	1
1162	581.242	10.1	GAS1-N95TT		1	VYAINTTLDHSECMK	VYAINTTLDHSEC[PPa]MK[1162]	2	y	1	4	10.1	GAS1-N95TT	0	FALSE	0	0.99	FALSE	1
1187	581.242	10.1	GAS1-N95TT		1	VYAINTTLDHSECMK	VYAINTTLDHSEC[PPa]MK[1187]	2	y	1	4	10.1	GAS1-N95TT	0	FALSE	0	0.99	FALSE	1
1212	581.242	10.1	GAS1-N95TT		1	VYAINTTLDHSECMK	VYAINTTLDHSEC[PPa]MK[1212]	2	y	1	4	10.1	GAS1-N95TT	0	FALSE	0	0.99	FALSE	1
1237	581.242	10.1	GAS1-N95TT		1	VYAINTTLDHSECMK	VYAINTTLDHSEC[PPa]MK[1237]	2	y	1	4	10.1	GAS1-N95TT	0	FALSE	0	0.99	FALSE	1
412.5	224.134	10.1	GAS1-N95TT		1	VYAINTTLDHSECMK	VYAINTTLDHSEC[PPa]MK[412]	2	b	2	4	10.1	GAS1-N95TT	0	FALSE	0	0.99	FALSE	1
437	224.134	10.1	GAS1-N95TT		1	VYAINTTLDHSECMK	VYAINTTLDHSEC[PPa]MK[437]	2	b	2	4	10.1	GAS1-N95TT	0	FALSE	0	0.99	FALSE	1
462	224.134	10.1	GAS1-N95TT		1	VYAINTTLDHSECMK	VYAINTTLDHSEC[PPa]MK[462]	2	b	2	4	10.1	GAS1-N95TT	0	FALSE	0	0.99	FALSE	1
487	224.134	10.1	GAS1-N95TT		1	VYAINTTLDHSECMK	VYAINTTLDHSEC[PPa]MK[487]	2	b	2	4	10.1	GAS1-N95TT	0	FALSE	0	0.99	FALSE	1
512	224.134	10.1	GAS1-N95TT		1	VYAINTTLDHSECMK	VYAINTTLDHSEC[PPa]MK[512]	2	b	2	4	10.1	GAS1-N95TT	0	FALSE	0	0.99	FALSE	1
537	224.134	10.1	GAS1-N95TT		1	VYAINTTLDHSECMK	VYAINTTLDHSEC[PPa]MK[537]	2	b	2	4	10.1	GAS1-N95TT	0	FALSE	0	0.99	FALSE	1
562	224.134	10.1	GAS1-N95TT		1	VYAINTTLDHSECMK	VYAINTTLDHSEC[PPa]MK[562]	2	b	2	4	10.1	GAS1-N95TT	0	FALSE	0	0.99	FALSE	1
587	224.134	10.61	GAS1-N95TT		1	VYAINTTLDHSECMK	VYAINTTLDHSEC[PPa]MK[587]	2	b	2	4	10.61	GAS1-N95TT	0	FALSE	0	0.99	FALSE	1
612	224.134	10.61	GAS1-N95TT		1	VYAINTTLDHSECMK	VYAINTTLDHSEC[PPa]MK[612]	2	b	2	4	10.61	GAS1-N95TT	0	FALSE	0	0.99	FALSE	1
637	224.134	10.1	GAS1-N95TT		1	VYAINTTLDHSECMK	VYAINTTLDHSEC[PPa]MK[637]	2	b	2	4	10.1	GAS1-N95TT	0	FALSE	0	0.99	FALSE	1
662	224.134	10.1	GAS1-N95TT		1	VYAINTTLDHSECMK	VYAINTTLDHSEC[PPa]MK[662]	2	b	2	4	10.1	GAS1-N95TT	0	FALSE	0	0.99	FALSE	1
687	224.134	10.1	GAS1-N95TT		1	VYAINTTLDHSECMK	VYAINTTLDHSEC[PPa]MK[687]	2	b	2	4	10.1	GAS1-N95TT	0	FALSE	0	0.99	FALSE	1
712	224.134	10.1	GAS1-N95TT		1	VYAINTTLDHSECMK	VYAINTTLDHSEC[PPa]MK[712]	2	b	2	4	10.1	GAS1-N95TT	0	FALSE	0	0.99	FALSE	1
737	224.134	10.1	GAS1-N95TT		1	VYAINTTLDHSECMK	VYAINTTLDHSEC[PPa]MK[737]	2	b	2	4	10.1	GAS1-N95TT	0	FALSE	0	0.99	FALSE	1
762	224.134	10.1	GAS1-N95TT		1	VYAINTTLDHSECMK	VYAINTTLDHSEC[PPa]MK[762]	2	b	2	4	10.1	GAS1-N95TT	0	FALSE	0	0.99	FALSE	1
787	224.134	10.1	GAS1-N95TT		1	VYAINTTLDHSECMK	VYAINTTLDHSEC[PPa]MK[787]	2	b	2	4	10.1	GAS1-N95TT	0	FALSE	0	0.99	FALSE	1
812	224.134	10.1	GAS1-N95TT		1	VYAINTTLDHSECMK	VYAINTTLDHSEC[PPa]MK[812]	2	b	2	4	10.1	GAS1-N95TT	0	FALSE	0	0.99	FALSE	1
837	224.134	10.1	GAS1-N95TT		1	VYAINTTLDHSECMK	VYAINTTLDHSEC[PPa]MK[837]	2	b	2	4	10.1	GAS1-N95TT	0	FALSE	0	0.99	FALSE	1
862	224.134	10.1	GAS1-N95TT		1	VYAINTTLDHSECMK	VYAINTTLDHSEC[PPa]MK[862]	2	b	2	4	10.1	GAS1-N95TT	0	FALSE	0	0.99	FALSE	1
887	224.134	10.1	GAS1-N95TT		1	VYAINTTLDHSECMK	VYAINTTLDHSEC[PPa]MK[887]	2	b	2	4	10.1	GAS1-N95TT	0	FALSE	0	0.99	FALSE	1
912	224.134	10.1	GAS1-N95TT		1	VYAINTTLDHSECMK	VYAINTTLDHSEC[PPa]MK[912]	2	b	2	4	10.1	GAS1-N95TT	0	FALSE	0	0.99	FALSE	1
937	224.134	10.1	GAS1-N95TT		1	VYAINTTLDHSECMK	VYAINTTLDHSEC[PPa]MK[937]	2	b	2	4	10.1	GAS1-N95TT	0	FALSE	0	0.99	FALSE	1
962	224.134	10.1	GAS1-N95TT		1	VYAINTTLDHSECMK	VYAINTTLDHSEC[PPa]MK[962]	2	b	2	4	10.1	GAS1-N95TT	0	FALSE	0	0.99	FALSE	1
987	224.134	10.1	GAS1-N95TT		1	VYAINTTLDHSECMK	VYAINTTLDHSEC[PPa]MK[987]	2	b	2	4	10.1	GAS1-N95TT	0	FALSE	0	0.99	FALSE	1
1012	224.134	10.1	GAS1-N95TT		1	VYAINTTLDHSECMK	VYAINTTLDHSEC[PPa]MK[1012]	2	b	2	4	10.1	GAS1-N95TT	0	FALSE	0	0.99	FALSE	1
1037	224.134	10.1	GAS1-N95TT		1	VYAINTTLDHSECMK	VYAINTTLDHSEC[PPa]MK[1037]	2	b	2	4	10.1	GAS1-N95TT	0	FALSE	0	0.99	FALSE	1
1062	224.134	10.1	GAS1-N95TT		1	VYAINTTLDHSECMK	VYAINTTLDHSEC[PPa]MK[1062]	2	b	2	4	10.1	GAS1-N95TT	0	FALSE	0	0.99	FALSE	1
1087	224.134	10.1	GAS1-N95TT		1	VYAINTTLDHSECMK	VYAINTTLDHSEC[PPa]MK[1087]	2	b	2	4	10.1	GAS1-N95TT	0	FALSE	0	0.99	FALSE	1
1112	224.134	10.1	GAS1-N95TT		1	VYAINTTLDHSECMK	VYAINTTLDHSEC[PPa]MK[1112]	2	b	2	4	10.1	GAS1-N95TT	0	FALSE	0	0.99	FALSE	1
1137	224.134	10.1	GAS1-N95TT		1	VYAINTTLDHSECMK	VYAINTTLDHSEC[PPa]MK[1137]	2	b	2	4	10.1	GAS1-N95TT	0	FALSE	0	0.99	FALSE	1
1162	224.134	10.1	GAS1-N95TT		1	VYAINTTLDHSECMK	VYAINTTLDHSEC[PPa]MK[1162]	2	b	2	4	10.1	GAS1-N95TT	0	FALSE	0	0.99	FALSE	1
1187	224.134	10.1	GAS1-N95TT		1	VYAINTTLDHSECMK	VYAINTTLDHSEC[PPa]MK[1187]	2	b	2	4	10.1	GAS1-N95TT	0	FALSE	0	0.99	FALSE	1
1212	224.134	10.1	GAS1-N95TT		1	VYAINTTLDHSECMK	VYAINTTLDHSEC[PPa]MK[1212]	2	b	2	4	10.1	GAS1-N95TT	0	FALSE	0	0.99	FALSE	1
1237	224.134	10.1	GAS1-N95TT		1	VYAINTTLDHSECMK	VYAINTTLDHSEC[PPa]MK[1237]	2	b	2	4	10.1	GAS1-N95TT	0	FALSE	0	0.99	FALSE	1
412.5	291.125	10.1	GAS1-N95TT		1	VYAINTTLDHSECMK	VYAINTTLDHSEC[PPa]MK[412]	2	y	2	4	10.1	GAS1-N95TT	0	FALSE	0	0.99	FALSE	1
437	291.125	10.1	GAS1-N95TT		1	VYAINTTLDHSECMK	VYAINTTLDHSEC[PPa]MK[437]	2	y	2	4	10.1	GAS1-N95TT	0	FALSE	0	0.99	FALSE	1
462	291.125	10.1	GAS1-N95TT		1	VYAINTTLDHSECMK	VYAINTTLDHSEC[PPa]MK[462]	2	y	2	4	10.1	GAS1-N95TT	0	FALSE	0	0.99	FALSE	1
487	291.125	10.1	GAS1-N95TT		1	VYAINTTLDHSECMK	VYAINTTLDHSEC[PPa]MK[487]	2	y	2	4	10.1	GAS1-N95TT	0	FALSE	0	0.99	FALSE	1
512	291.125	10.1	GAS1-N95TT		1	VYAINTTLDHSECMK	VYAINTTLDHSEC[PPa]MK[512]	2	y	2	4	10.1	GAS1-N95TT	0	FALSE	0	0.99	FALSE	1
537	291.125	10.1	GAS1-N95TT		1	VYAINTTLDHSECMK	VYAINTTLDHSEC[PPa]MK[537]	2	y	2	4	10.1	GAS1-N95TT	0	FALSE	0	0.99	FALSE	1
562	291.125	10.1	GAS1-N95TT		1	VYAINTTLDHSECMK	VYAINTTLDHSEC[PPa]MK[562]	2	y	2	4	10.1	GAS1-N95TT	0	FALSE	0	0.99	FALSE	1
587	291.125	10.61	GAS1-N95TT		1	VYAINTTLDHSECMK	VYAINTTLDHSEC[PPa]MK[587]	2	y	2	4	10.61	GAS1-N95TT	0	FALSE	0	0.99	FALSE	1
612	291.125	10.61	GAS1-N95TT		1	VYAINTTLDHSECMK	VYAINTTLDHSEC[PPa]MK[612]	2	y	2	4	10.61	GAS1-N95TT	0	FALSE	0	0.99	FALSE	1
637	291.125	10.1	GAS1-N95TT		1	VYAINTTLDHSECMK	VYAINTTLDHSEC[PPa]MK[637]	2	y	2	4	10.1	GAS1-N95TT	0	FALSE	0	0.99	FALSE	1
662	291.125	10.1	GAS1-N95TT		1	VYAINTTLDHSECMK	VYAINTTLDHSEC[PPa]MK[662]	2	y	2	4	10.1	GAS1-N95TT	0	FALSE	0	0.99	FALSE	1
687	291.125	10.1	GAS1-N95TT		1	VYAINTTLDHSECMK	VYAINTTLDHSEC[PPa]MK[687]	2	y	2	4	10.1	GAS1-N95TT	0	FALSE	0	0.99	FALSE	1
712	291.125	10.1	GAS1-N95TT		1	VYAINTTLDHSECMK	VYAINTTLDHSEC[PPa]MK[712]	2	y	2	4	10.1	GAS1-N95TT	0	FALSE	0	0.99	FALSE	1
737	291.125	10.1	GAS1-N95TT		1	VYAINTTLDHSECMK	VYAINTTLDHSEC[PPa]MK[737]	2	y	2	4	10.1	GAS1-N95TT	0	FALSE	0	0.99	FALSE	1
762	291.125	10.1	GAS1-N95TT		1	VYAINTTLDHSECMK	VYAINTTLDHSEC[PPa]MK[762]	2	y	2	4	10.1	GAS1-N95TT	0	FALSE	0	0.99	FALSE	1
787	291.125	10.1	GAS1-N95TT		1	VYAINTTLDHSECMK	VYAINTTLDHSEC[PPa]MK[787]	2	y	2	4	10.1	GAS1-N95TT	0	FALSE	0	0.99	FALSE	1
812	291.125	10.1	GAS1-N95TT		1	VYAINTTLDHSECMK	VYAINTTLDHSEC[PPa]MK[812]	2	y	2	4	10.1	GAS1-N95TT	0	FALSE	0	0.99	FALSE	1
837	291.125	10.1	GAS1-N95TT		1	VYAINTTLDHSECMK	VYAINTTLDHSEC[PPa]MK[837]	2	y	2	4	10.1	GAS1-N95TT	0	FALSE	0	0.99	FALSE	1
862	291.125	10.1	GAS1-N95TT		1	VYAINTTLDHSECMK	VYAINTTLDHSEC[PPa]MK[862]	2	y	2	4	10.1	GAS1-N95TT	0	FALSE	0	0.99	FALSE	1
887	291.125	10.1	GAS1-N95TT		1	VYAINTTLDHSECMK	VYAINTTLDHSEC[PPa]MK[887]	2	y	2	4	10.1	GAS1-N95TT	0	FALSE	0	0.99	FALSE	1
912	291.125	10.1	GAS1-N95TT		1	VYAINTTLDHSECMK	VYAINTTLDHSEC[PPa]MK[912]	2	y	2	4	10.1	GAS1-N95TT	0	FALSE	0	0.99	FALSE	1
937	291.125	10.1	GAS1-N95TT		1	VYAINTTLDHSECMK	VYAINTTLDHSEC[PPa]MK[937]	2	y	2	4	10.1	GAS1-N95TT	0	FALSE	0	0.99	FALSE	1
962	291.125	10.1	GAS1-N95TT		1	VYAINTTLDHSECMK	VYAINTTLDHSEC[PPa]MK[962]	2	y	2	4	10.1	GAS1-N95TT	0	FALSE	0	0.99	FALSE	1
987	291.125	10.1	GAS1-N95TT		1	VYAINTTLDHSECMK	VYAINTTLDHSEC[PPa]MK[987]	2	y	2	4	10.1	GAS1-N95TT	0	FALSE	0	0.99	FALSE	1
1012	291.125	10.1	GAS1-N95TT		1	VYAINTTLDHSECMK	VYAINTTLDHSEC[PPa]MK[1012]	2	y	2	4	10.1	GAS1-N95TT	0	FALSE	0	0.99	FALSE	1
1037	291.125	10.1	GAS1-N95TT		1	VYAINTTLDHSECMK	VYAINTTLDHSEC[PPa]MK[1037]	2	y	2	4	10.1	GAS1-N95TT	0	FALSE	0	0.99	FALSE	1
1062	291.125	10.1	GAS1-N95TT		1	VYAINTTLDHSECMK	VYAINTTLDHSEC[PPa]MK[1062]	2	y	2	4	10.1	GAS1-N95TT	0	FALSE	0	0.99	FALSE	1
1087	291.125	10.1	GAS1-N95TT		1	VYAINTTLDHSECMK	VYAINTTLDHSEC[PPa]MK[1087]	2	y	2	4	10.1	GAS1-N95TT	0	FALSE	0	0.99	FALSE	1
1112	291.125	10.1	GAS1-N95TT		1	VYAINTTLDHSECMK	VYAINTTLDHSEC[PPa]MK[1112]	2	y	2	4	10.1	GAS1-N95TT	0	FALSE	0	0.99	FALSE	1
1137	291.125	10.1	GAS1-N95TT		1	VYAINTTLDHSECMK	VYAINTTLDHSEC[PPa]MK[1137]	2	y	2	4	10.1	GAS1-N95TT	0	FALSE	0	0.99	FALSE	1
1162	291.125	10.1	GAS1-N95TT		1	VYAINTTLDHSECMK	VYAINTTLDHSEC[PPa]MK[1162]	2	y	2	4	10.1	GAS1-N95TT	0	FALSE	0	0.99	FALSE	1
1187	291.125	10.1	GAS1-N95TT		1	VYAINTTLDHSECMK	VYAINTTLDHSEC[PPa]MK[1187]	2	y	2	4	10.1	GAS1-N95TT	0	FALSE	0	0.99	FALSE	1
1212	291.125	10.1	GAS1-N95TT		1	VYAINTTLDHSECMK	VYAINTTLDHSEC[PPa]MK[1212]	2	y	2	4	10.1	GAS1-N95TT	0	FALSE	0	0.99	FALSE	1
1237	291.125	10.1	GAS1-N95TT		1	VYAINTTLDHSECMK	VYAINTTLDHSEC[PPa]MK[1237]	2	y	2	4	10.1	GAS1-N95TT	0	FALSE	0	0.99	FALSE	1
412.5	668.274	10.1	GAS1-N95TT		1	VYAINTTLDHSECMK	VYAINTTLDHSEC[PPa]MK[412]	2	y	1	5	10.1	GAS1-N95TT	0	FALSE	0	0.99	FALSE	1
437	668.274	10.1	GAS1-N95TT		1	VYAINTTLDHSECMK	VYAINTTLDHSEC[PPa]MK[437]	2	y	1	5	10.1	GAS1-N95TT	0	FALSE	0	0.99	FALSE	1
462	668.274	10.1	GAS1-N95TT		1	VYAINTTLDHSECMK	VYAINTTLDHSEC[PPa]MK[462]	2	y	1	5	10.1	GAS1-N95TT	0	FALSE	0	0.99	FALSE	1
487	668.274	10.1	GAS1-N95TT		1	VYAINTTLDHSECMK	VYAINTTLDHSEC[PPa]MK[487]	2	y	1	5	10.1	GAS1-N95TT	0	FALSE	0	0.99	FALSE	1
512	668.274	10.1	GAS1-N95TT		1	VYAINTTLDHSECMK	VYAINTTLDHSEC[PPa]MK[512]	2	y	1	5	10.1	GAS1-N95TT	0	FALSE	0	0.99	FALSE	1
537	668.274	10.1	GAS1-N95TT		1	VYAINTTLDHSECMK	VYAINTTLDHSEC[PPa]MK[537]	2	y	1	5	10.1	GAS1-N95TT	0	FALSE	0	0.99	FALSE	1
562	668.274	10.1	GAS1-N95TT		1	VYAINTTLDHSECMK	VYAINTTLDHSEC[PPa]MK[562]	2	y	1	5	10.1	GAS1-N95TT	0	FALSE	0	0.99	FALSE	1
587	668.274	10.61	GAS1-N95TT		1	VYAINTTLDHSECMK	VYAINTTLDHSEC[PPa]MK[587]	2	y	1	5	10.61	GAS1-N95TT	0	FALSE	0	0.99	FALSE	1
612	668.274	10.61	GAS1-N95TT		1	VYAINTTLDHSECMK	VYAINTTLDHSEC[PPa]MK[612]	2	y	1	5	10.61	GAS1-N95TT	0	FALSE	0	0.99	FALSE	1
637	668.274	10.1	GAS1-N95TT		1	VYAINTTLDHSECMK	VYAINTTLDHSEC[PPa]MK[637]	2	y	1	5	10.1	GAS1-N95TT	0	FALSE	0	0.99	FALSE	1
662	668.274	10.1	GAS1-N95TT		1	VYAINTTLDHSECMK	VYAINTTLDHSEC[PPa]MK[662]	2	y	1	5	10.1	GAS1-N95TT	0	FALSE	0	0.99	FALSE	1
687	668.274	10.1	GAS1-N95TT		1	VYAINTTLDHSECMK	VYAINTTLDHSEC[PPa]MK[687]	2	y	1	5	10.1	GAS1-N95TT	0	FALSE	0	0.99	FALSE	1
712	668.274	10.1	GAS1-N95TT		1	VYAINTTLDHSECMK	VYAINTTLDHSEC[PPa]MK[712]	2	y	1	5	10.1	GAS1-N95TT	0	FALSE	0	0.99	FALSE	1
737	668.274	10.1	GAS1-N95TT		1	VYAINTTLDHSECMK	VYAINTTLDHSEC[PPa]MK[737]	2	y	1	5	10.1	GAS1-N95TT	0	FALSE	0	0.99	FALSE	1
762	668.274	10.1	GAS1-N95TT		1	VYAINTTLDHSECMK	VYAINTTLDHSEC[PPa]MK[762]	2	y	1	5	10.1	GAS1-N95TT	0	FALSE	0	0.99	FALSE	1
787	668.274	10.1	GAS1-N95TT		1	VYAINTTLDHSECMK	VYAINTTLDHSEC[PPa]MK[787]	2	y	1	5	10.1	GAS1-N95TT	0	FALSE	0	0.99	FALSE	1
812	668.274	10.1	GAS1-N95TT		1	VYAINTTLDHSECMK	VYAINTTLDHSEC[PPa]MK[812]	2	y	1	5	10.1	GAS1-N95TT	0	FALSE	0	0.99	FALSE	1
837	668.274	10.1	GAS1-N95TT		1	VYAINTTLDHSECMK	VYAINTTLDHSEC[PPa]MK[837]	2	y	1	5	10.1	GAS1-N95TT	0	FALSE	0	0.99	FALSE	1
862	668.274	10.1	GAS1-N95TT		1	VYAINTTLDHSECMK	VYAINTTLDHSEC[PPa]MK[862]	2	y	1	5	10.1	GAS1-N95TT	0	FALSE	0	0.99	FALSE	1
887	668.274	10.1	GAS1-N95TT		1	VYAINTTLDHSECMK	VYAINTTLDHSEC[PPa]MK[887]	2	y	1	5	10.1	GAS1-N95TT	0	FALSE	0	0.99	FALSE	1
912	668.274	10.1	GAS1-N95TT		1	VYAINTTLDHSECMK	VYAINTTLDHSEC[PPa]MK[912]	2	y	1	5	10.1	GAS1-N95TT	0	FALSE	0	0.99	FALSE	1
937	668.274	10.1	GAS1-N95TT		1	VYAINTTLDHSECMK	VYAINTTLDHSEC[PPa]MK[937]	2	y	1	5	10.1	GAS1-N95TT	0	FALSE	0	0.99	FALSE	1
962	668.274	10.1	GAS1-N95TT		1	VYAINTTLDHSECMK	VYAINTTLDHSEC[PPa]MK[962]	2	y	1	5	10.1	GAS1-N95TT	0	FALSE	0	0.99	FALSE	1
987	668.274	10.1	GAS1-N95TT		1	VYAINTTLDHSECMK	VYAINTTLDHSEC[PPa]MK[987]	2	y	1	5	10.1	GAS1-N95TT	0	FALSE	0	0.99	FALSE	1
1012	668.274	10.1	GAS1-N95TT		1	VYAINTTLDHSECMK	VYAINTTLDHSEC[PPa]MK[1012]	2	y	1	5	10.1	GAS1-N95TT	0	FALSE	0	0.99	FALSE	1
1037	668.274	10.1	GAS1-N95TT		1	VYAINTTLDHSECMK	VYAINTTLDHSEC[PPa]MK[1037]	2	y	1	5	10.1	GAS1-N95TT	0	FALSE	0	0.99	FALSE	1
1062	668.274	10.1	GAS1-N95TT		1	VYAINTTLDHSECMK	VYAINTTLDHSEC[PPa]MK[1062]	2	y	1	5	10.1	GAS1-N95TT	0	FALSE	0	0.99	FALSE	1
1087	668.274	10.1	GAS1-N95TT		1	VYAINTTLDHSECMK	VYAINTTLDHSEC[PPa]MK[1087]	2	y	1	5	10.1	GAS1-N95TT	0	FALSE	0	0.99	FALSE	1
1112	668.274	10.1	GAS1-N95TT		1	VYAINTTLDHSECMK	VYAINTTLDHSEC[PPa]MK[1112]	2	y	1	5	10.1	GAS1-N95TT	0	FALSE	0	0.99	FALSE	1
1137	668.274	10.1	GAS1-N95TT		1	VYAINTTLDHSECMK	VYAINTTLDHSEC[PPa]MK[1137]	2	y	1	5	10.1	GAS1-N95TT	0	FALSE	0	0.99	FALSE	1
1162	668.274	10.1	GAS1-N95TT		1	VYAINTTLDHSECMK	VYAINTTLDHSEC[PPa]MK[1162]	2	y	1	5	10.1	GAS1-N95TT	0	FALSE	0	0.99	FALSE	1
1187	668.274	10.1	GAS1-N95TT		1	VYAINTTLDHSECMK	VYAINTTLDHSEC[PPa]MK[1187]	2	y	1	5	10.1	GAS1-N95TT	0	FALSE	0	0.99	FALSE	1
1212	668.274	10.1	GAS1-N95TT		1	VYAINTTLDHSECMK	VYAINTTLDHSEC[PPa]MK[1212]	2	y	1	5	10.1	GAS1-N95TT	0	FALSE	0	0.99	FALSE	1
1237	668.274	10.1	GAS1-N95TT		1	VYAINTTLDHSECMK	VYAINTTLDHSEC[PPa]MK[1237]	2	y	1	5	10.1	GAS1-N95TT	0	FALSE	0	0.99	FALSE	1
412.5	334.641	10.1	GAS1-N95TT		1	VYAINTTLDHSECMK	VYAINTTLDHSEC[PPa]MK[412]	2	y	2	5	10.1	GAS1-N95TT	0	FALSE	0	0.99	FALSE	1
437	334.641	10.1	GAS1-N95TT		1	VYAINTTLDHSECMK	VYAINTTLDHSEC[PPa]MK[437]	2	y	2	5	10.1	GAS1-N95TT	0	FALSE	0	0.99	FALSE	1
462	334.641	10.1	GAS1-N95TT		1	VYAINTTLDHSECMK	VYAINTTLDHSEC[PPa]MK[462]	2	y	2	5	10.1	GAS1-N95TT	0	FALSE	0	0.99	FALSE	1
487	334.641	10.1	GAS1-N95TT		1	VYAINTTLDHSECMK	VYAINTTLDHSEC[PPa]MK[487]	2	y	2	5	10.1	GAS1-N95TT	0	FALSE	0	0.99	FALSE	1
512	334.641	10.1	GAS1-N95TT		1	VYAINTTLDHSECMK	VYAINTTLDHSEC[PPa]MK[512]	2	y	2	5	10.1	GAS1-N95TT	0	FALSE	0	0.99	FALSE	1
537	334.641	10.1	GAS1-N95TT		1	VYAINTTLDHSECMK	VYAINTTLDHSEC[PPa]MK[537]	2	y	2	5	10.1	GAS1-N95TT	0	FALSE	0	0.99	FALSE	1
562	334.641	10.1	GAS1-N95TT		1	VYAINTTLDHSECMK	VYAINTTLDHSEC[PPa]MK[562]	2	y	2	5	10.1	GAS1-N95TT	0	FALSE	0	0.99	FALSE	1
587	334.641	10.61	GAS1-N95TT		1	VYAINTTLDHSECMK	VYAINTTLDHSEC[PPa]MK[587]	2	y	2	5	10.61	GAS1-N95TT	0	FALSE	0	0.99	FALSE	1
612	334.641	10.61	GAS1-N95TT		1	VYAINTTLDHSECMK	VYAINTTLDHSEC[PPa]MK[612]	2	y	2	5	10.61	GAS1-N95TT	0	FALSE	0	0.99	FALSE	1
637	334.641	10.1	GAS1-N95TT		1	VYAINTTLDHSECMK	VYAINTTLDHSEC[PPa]MK[637]	2	y	2	5	10.1	GAS1-N95TT	0	FALSE	0	0.99	FALSE	1
662	334.641	10.1	GAS1-N95TT		1	VYAINTTLDHSECMK	VYAINTTLDHSEC[PPa]MK[662]	2	y	2	5	10.1	GAS1-N95TT	0	FALSE	0	0.99	FALSE	1
687	334.641	10.1	GAS1-N95TT		1	VYAINTTLDHSECMK	VYAINTTLDHSEC[PPa]MK[687]	2	y	2	5	10.1	GAS1-N95TT	0	FALSE	0	0.99	FALSE	1
712	334.641	10.1	GAS1-N95TT		1	VYAINTTLDHSECMK	VYAINTTLDHSEC[PPa]MK[712]	2	y	2	5	10.1	GAS1-N95TT	0	FALSE	0	0.99	FALSE	1
737	334.641	10.1	GAS1-N95TT		1	VYAINTTLDHSECMK	VYAINTTLDHSEC[PPa]MK[737]	2	y	2	5	10.1	GAS1-N95TT	0	FALSE	0	0.99	FALSE	1
762	334.641	10.1	GAS1-N95TT		1	VYAINTTLDHSECMK	VYAINTTLDHSEC[PPa]MK[762]	2	y	2	5	10.1	GAS1-N95TT	0	FALSE	0	0.99	FALSE	1
787	334.641	10.1	GAS1-N95TT		1	VYAINTTLDHSECMK	VYAINTTLDHSEC[PPa]MK[787]	2	y	2	5	10.1	GAS1-N95TT	0	FALSE	0	0.99	FALSE	1
812	334.641	10.1	GAS1-N95TT		1	VYAINTTLDHSECMK	VYAINTTLDHSEC[PPa]MK[812]	2	y	2	5	10.1	GAS1-N95TT	0	FALSE	0	0.99	FALSE	1
837	334.641	10.1	GAS1-N95TT		1	VYAINTTLDHSECMK	VYAINTTLDHSEC[PPa]MK[837]	2	y	2	5	10.1	GAS1-N95TT	0	FALSE	0	0.99	FALSE	1
862	334.641	10.1	GAS1-N95TT		1	VYAINTTLDHSECMK	VYAINTTLDHSEC[PPa]MK[862]	2	y	2	5	10.1	GAS1-N95TT	0	FALSE	0	0.99	FALSE	1
887	334.641	10.1	GAS1-N95TT		1	VYAINTTLDHSECMK	VYAINTTLDHSEC[PPa]MK[887]	2	y	2	5	10.1	GAS1-N95TT	0	FALSE	0	0.99	FALSE	1
912	334.641	10.1	GAS1-N95TT		1	VYAINTTLDHSECMK	VYAINTTLDHSEC[PPa]MK[912]	2	y	2	5	10.1	GAS1-N95TT	0	FALSE	0	0.99	FALSE	1
937	334.641	10.1	GAS1-N95TT		1	VYAINTTLDHSECMK	VYAINTTLDHSEC[PPa]MK[937]	2	y	2	5	10.1	GAS1-N95TT	0	FALSE	0	0.99	FALSE	1
962	334.641	10.1	GAS1-N95TT		1	VYAINTTLDHSECMK	VYAINTTLDHSEC[PPa]MK[962]	2	y	2	5	10.1	GAS1-N95TT	0	FALSE	0	0.99	FALSE	1
987	334.641	10.1	GAS1-N95TT		1	VYAINTTLDHSECMK	VYAINTTLDHSEC[PPa]MK[987]	2	y	2	5	10.1	GAS1-N95TT	0	FALSE	0	0.99	FALSE	1
1012	334.641	10.1	GAS1-N95TT		1	VYAINTTLDHSECMK	VYAINTTLDHSEC[PPa]MK[1012]	2	y	2	5	10.1	GAS1-N95TT	0	FALSE	0	0.99	FALSE	1
1037	334.641	10.1	GAS1-N95TT		1	VYAINTTLDHSECMK	VYAINTTLDHSEC[PPa]MK[1037]	2	y	2	5	10.1	GAS1-N95TT	0	FALSE	0	0.99	FALSE	1
1062	334.641	10.1	GAS1-N95TT		1	VYAINTTLDHSECMK	VYAINTTLDHSEC[PPa]MK[1062]	2	y	2	5	10.1	GAS1-N95TT	0	FALSE	0	0.99	FALSE	1
1087	334.641	10.1	GAS1-N95TT		1	VYAINTTLDHSECMK	VYAINTTLDHSEC[PPa]MK[1087]	2	y	2	5	10.1	GAS1-N95TT	0	FALSE	0	0.99	FALSE	1
1112	334.641	10.1	GAS1-N95TT		1	VYAINTTLDHSECMK	VYAINTTLDHSEC[PPa]MK[1112]	2	y	2	5	10.1	GAS1-N95TT	0	FALSE	0	0.99	FALSE	1
1137	334.641	10.1	GAS1-N95TT		1	VYAINTTLDHSECMK	VYAINTTLDHSEC[PPa]MK[1137]	2	y	2	5	10.1	GAS1-N95TT	0	FALSE	0	0.99	FALSE	1
1162	334.641	10.1	GAS1-N95TT		1	VYAINTTLDHSECMK	VYAINTTLDHSEC[PPa]MK[1162]	2	y	2	5	10.1	GAS1-N95TT	0	FALSE	0	0.99	FALSE	1
1187	334.641	10.1	GAS1-N95TT		1	VYAINTTLDHSECMK	VYAINTTLDHSEC[PPa]MK[1187]	2	y	2	5	10.1	GAS1-N95TT	0	FALSE	0	0.99	FALSE	1
1212	334.641	10.1	GAS1-N95TT		1	VYAINTTLDHSECMK	VYAINTTLDHSEC[PPa]MK[1212]	2	y	2	5	10.1	GAS1-N95TT	0	FALSE	0	0.99	FALSE	1
1237	334.641	10.1	GAS1-N95TT		1	VYAINTTLDHSECMK	VYAINTTLDHSEC[PPa]MK[1237]	2	y	2	5	10.1	GAS1-N95TT	0	FALSE	0	0.99	FALSE	1
412.5	805.333	10.1	GAS1-N95TT		1	VYAINTTLDHSECMK	VYAINTTLDHSEC[PPa]MK[412]	2	y	1	6	10.1	GAS1-N95TT	0	FALSE	0	0.99	FALSE	1
437	805.333	10.1	GAS1-N95TT		1	VYAINTTLDHSECMK	VYAINTTLDHSEC[PPa]MK[437]	2	y	1	6	10.1	GAS1-N95TT	0	FALSE	0	0.99	FALSE	1
462	805.333	10.1	GAS1-N95TT		1	VYAINTTLDHSECMK	VYAINTTLDHSEC[PPa]MK[462]	2	y	1	6	10.1	GAS1-N95TT	0	FALSE	0	0.99	FALSE	1
487	805.333	10.1	GAS1-N95TT		1	VYAINTTLDHSECMK	VYAINTTLDHSEC[PPa]MK[487]	2	y	1	6	10.1	GAS1-N95TT	0	FALSE	0	0.99	FALSE	1
512	805.333	10.1	GAS1-N95TT		1	VYAINTTLDHSECMK	VYAINTTLDHSEC[PPa]MK[512]	2	y	1	6	10.1	GAS1-N95TT	0	FALSE	0	0.99	FALSE	1
537	805.333	10.1	GAS1-N95TT		1	VYAINTTLDHSECMK	VYAINTTLDHSEC[PPa]MK[537]	2	y	1	6	10.1	GAS1-N95TT	0	FALSE	0	0.99	FALSE	1
562	805.333	10.1	GAS1-N95TT		1	VYAINTTLDHSECMK	VYAINTTLDHSEC[PPa]MK[562]	2	y	1	6	10.1	GAS1-N95TT	0	FALSE	0	0.99	FALSE	1
587	805.333	10.61	GAS1-N95TT		1	VYAINTTLDHSECMK	VYAINTTLDHSEC[PPa]MK[587]	2	y	1	6	10.61	GAS1-N95TT	0	FALSE	0	0.99	FALSE	1
612	805.333	10.61	GAS1-N95TT		1	VYAINTTLDHSECMK	VYAINTTLDHSEC[PPa]MK[612]	2	y	1	6	10.61	GAS1-N95TT	0	FALSE	0	0.99	FALSE	1
637	805.333	10.1	GAS1-N95TT		1	VYAINTTLDHSECMK	VYAINTTLDHSEC[PPa]MK[637]	2	y	1	6	10.1	GAS1-N95TT	0	FALSE	0	0.99	FALSE	1
662	805.333	10.1	GAS1-N95TT		1	VYAINTTLDHSECMK	VYAINTTLDHSEC[PPa]MK[662]	2	y	1	6	10.1	GAS1-N95TT	0	FALSE	0	0.99	FALSE	1
687	805.333	10.1	GAS1-N95TT		1	VYAINTTLDHSECMK	VYAINTTLDHSEC[PPa]MK[687]	2	y	1	6	10.1	GAS1-N95TT	0	FALSE	0	0.99	FALSE	1
712	805.333	10.1	GAS1-N95TT		1	VYAINTTLDHSECMK	VYAINTTLDHSEC[PPa]MK[712]	2	y	1	6	10.1	GAS1-N95TT	0	FALSE	0	0.99	FALSE	1
737	805.333	10.1	GAS1-N95TT		1	VYAINTTLDHSECMK	VYAINTTLDHSEC[PPa]MK[737]	2	y	1	6	10.1	GAS1-N95TT	0	FALSE	0	0.99	FALSE	1
762	805.333	10.1	GAS1-N95TT		1	VYAINTTLDHSECMK	VYAINTTLDHSEC[PPa]MK[762]	2	y	1	6	10.1	GAS1-N95TT	0	FALSE	0	0.99	FALSE	1
787	805.333	10.1	GAS1-N95TT		1	VYAINTTLDHSECMK	VYAINTTLDHSEC[PPa]MK[787]	2	y	1	6	10.1	GAS1-N95TT	0	FALSE	0	0.99	FALSE	1
812	805.333	10.1	GAS1-N95TT		1	VYAINTTLDHSECMK	VYAINTTLDHSEC[PPa]MK[812]	2	y	1	6	10.1	GAS1-N95TT	0	FALSE	0	0.99	FALSE	1
837	805.333	10.1	GAS1-N95TT		1	VYAINTTLDHSECMK	VYAINTTLDHSEC[PPa]MK[837]	2	y	1	6	10.1	GAS1-N95TT	0	FALSE	0	0.99	FALSE	1
862	805.333	10.1	GAS1-N95TT		1	VYAINTTLDHSECMK	VYAINTTLDHSEC[PPa]MK[862]	2	y	1	6	10.1	GAS1-N95TT	0	FALSE	0	0.99	FALSE	1
887	805.333	10.1	GAS1-N95TT		1	VYAINTTLDHSECMK	VYAINTTLDHSEC[PPa]MK[887]	2	y	1	6	10.1	GAS1-N95TT	0	FALSE	0	0.99	FALSE	1
912	805.333	10.1	GAS1-N95TT		1	VYAINTTLDHSECMK	VYAINTTLDHSEC[PPa]MK[912]	2	y	1	6	10.1	GAS1-N95TT	0	FALSE	0	0.99	FALSE	1
937	805.333	10.1	GAS1-N95TT		1	VYAINTTLDHSECMK	VYAINTTLDHSEC[PPa]MK[937]	2	y	1	6	10.1	GAS1-N95TT	0	FALSE	0	0.99	FALSE	1
962	805.333	10.1	GAS1-N95TT		1	VYAINTTLDHSECMK	VYAINTTLDHSEC[PPa]MK[962]	2	y	1	6	10.1	GAS1-N95TT	0	FALSE	0	0.99	FALSE	1
987	805.333	10.1	GAS1-N95TT		1	VYAINTTLDHSECMK	VYAINTTLDHSEC[PPa]MK[987]	2	y	1	6	10.1	GAS1-N95TT	0	FALSE	0	0.99	FALSE	1
1012	805.333	10.1	GAS1-N95TT		1	VYAINTTLDHSECMK	VYAINTTLDHSEC[PPa]MK[1012]	2	y	1	6	10.1	GAS1-N95TT	0	FALSE	0	0.99	FALSE	1
1037	805.333	10.1	GAS1-N95TT		1	VYAINTTLDHSECMK	VYAINTTLDHSEC[PPa]MK[1037]	2	y	1	6	10.1	GAS1-N95TT	0	FALSE	0	0.99	FALSE	1
1062	805.333	10.1	GAS1-N95TT		1	VYAINTTLDHSECMK	VYAINTTLDHSEC[PPa]MK[1062]	2	y	1	6	10.1	GAS1-N95TT	0	FALSE	0	0.99	FALSE	1
1087	805.333	10.1	GAS1-N95TT		1	VYAINTTLDHSECMK	VYAINTTLDHSEC[PPa]MK[1087]	2	y	1	6	10.1	GAS1-N95TT	0	FALSE	0	0.99	FALSE	1
1112	805.333	10.1	GAS1-N95TT		1	VYAINTTLDHSECMK	VYAINTTLDHSEC[PPa]MK[1112]	2	y	1	6	10.1	GAS1-N95TT	0	FALSE	0	0.99	FALSE	1
1137	805.333	10.1	GAS1-N95TT		1	VYAINTTLDHSECMK	VYAINTTLDHSEC[PPa]MK[1137]	2	y	1	6	10.1	GAS1-N95TT	0	FALSE	0	0.99	FALSE	1
1162	805.333	10.1	GAS1-N95TT		1	VYAINTTLDHSECMK	VYAINTTLDHSEC[PPa]MK[1162]	2	y	1	6	10.1	GAS1-N95TT	0	FALSE	0	0.99	FALSE	1
1187	805.333	10.1	GAS1-N95TT		1	VYAINTTLDHSECMK	VYAINTTLDHSEC[PPa]MK[1187]	2	y	1	6	10.1	GAS1-N95TT	0	FALSE	0	0.99	FALSE	1
1212	805.333	10.1	GAS1-N95TT		1	VYAINTTLDHSECMK	VYAINTTLDHSEC[PPa]MK[1212]	2	y	1	6	10.1	GAS1-N95TT	0	FALSE	0	0.99	FALSE	1
1237	805.333	10.1	GAS1-N95TT		1	VYAINTTLDHSECMK	VYAINTTLDHSEC[PPa]MK[1237]	2	y	1	6	10.1	GAS1-N95TT	0	FALSE	0	0.99	FALSE	1
412.5	403.17	10.1	GAS1-N95TT		1	VYAINTTLDHSECMK	VYAINTTLDHSEC[PPa]MK[412]	2	y	2	6	10.1	GAS1-N95TT	0	FALSE	0	0.99	FALSE	1
437	403.17	10.1	GAS1-N95TT		1	VYAINTTLDHSECMK	VYAINTTLDHSEC[PPa]MK[437]	2	y	2	6	10.1	GAS1-N95TT	0	FALSE	0	0.99	FALSE	1
462	403.17	10.1	GAS1-N95TT		1	VYAINTTLDHSECMK	VYAINTTLDHSEC[PPa]MK[462]	2	y	2	6	10.1	GAS1-N95TT	0	FALSE	0	0.99	FALSE	1
487	403.17	10.1	GAS1-N95TT		1	VYAINTTLDHSECMK	VYAINTTLDHSEC[PPa]MK[487]	2	y	2	6	10.1	GAS1-N95TT	0	FALSE	0	0.99	FALSE	1
512	403.17	10.1	GAS1-N95TT		1	VYAINTTLDHSECMK	VYAINTTLDHSEC[PPa]MK[512]	2	y	2	6	10.1	GAS1-N95TT	0	FALSE	0	0.99	FALSE	1
537	403.17	10.1	GAS1-N95TT		1	VYAINTTLDHSECMK	VYAINTTLDHSEC[PPa]MK[537]	2	y	2	6	10.1	GAS1-N95TT	0	FALSE	0	0.99	FALSE	1
562	403.17	10.1	GAS1-N95TT		1	VYAINTTLDHSECMK	VYAINTTLDHSEC[PPa]MK[562]	2	y	2	6	10.1	GAS1-N95TT	0	FALSE	0	0.99	FALSE	1
587	403.17	10.61	GAS1-N95TT		1	VYAINTTLDHSECMK	VYAINTTLDHSEC[PPa]MK[587]	2	y	2	6	10.61	GAS1-N95TT	0	FALSE	0	0.99	FALSE	1
612	403.17	10.61	GAS1-N95TT		1	VYAINTTLDHSECMK	VYAINTTLDHSEC[PPa]MK[612]	2	y	2	6	10.61	GAS1-N95TT	0	FALSE	0	0.99	FALSE	1
637	403.17	10.1	GAS1-N95TT		1	VYAINTTLDHSECMK	VYAINTTLDHSEC[PPa]MK[637]	2	y	2	6	10.1	GAS1-N95TT	0	FALSE	0	0.99	FALSE	1
662	403.17	10.1	GAS1-N95TT		1	VYAINTTLDHSECMK	VYAINTTLDHSEC[PPa]MK[662]	2	y	2	6	10.1	GAS1-N95TT	0	FALSE	0	0.99	FALSE	1
687	403.17	10.1	GAS1-N95TT		1	VYAINTTLDHSECMK	VYAINTTLDHSEC[PPa]MK[687]	2	y	2	6	10.1	GAS1-N95TT	0	FALSE	0	0.99	FALSE	1
712	403.17	10.1	GAS1-N95TT		1	VYAINTTLDHSECMK	VYAINTTLDHSEC[PPa]MK[712]	2	y	2	6	10.1	GAS1-N95TT	0	FALSE	0	0.99	FALSE	1
737	403.17	10.1	GAS1-N95TT		1	VYAINTTLDHSECMK	VYAINTTLDHSEC[PPa]MK[737]	2	y	2	6	10.1	GAS1-N95TT	0	FALSE	0	0.99	FALSE	1
762	403.17	10.1	GAS1-N95TT		1	VYAINTTLDHSECMK	VYAINTTLDHSEC[PPa]MK[762]	2	y	2	6	10.1	GAS1-N95TT	0	FALSE	0	0.99	FALSE	1
787	403.17	10.1	GAS1-N95TT		1	VYAINTTLDHSECMK	VYAINTTLDHSEC[PPa]MK[787]	2	y	2	6	10.1	GAS1-N95TT	0	FALSE	0	0.99	FALSE	1
812	403.17	10.1	GAS1-N95TT		1	VYAINTTLDHSECMK	VYAINTTLDHSEC[PPa]MK[812]	2	y	2	6	10.1	GAS1-N95TT	0	FALSE	0	0.99	FALSE	1
837	403.17	10.1	GAS1-N95TT		1	VYAINTTLDHSECMK	VYAINTTLDHSEC[PPa]MK[837]	2	y	2	6	10.1	GAS1-N95TT	0	FALSE	0	0.99	FALSE	1
862	403.17	10.1	GAS1-N95TT		1	VYAINTTLDHSECMK	VYAINTTLDHSEC[PPa]MK[862]	2	y	2	6	10.1	GAS1-N95TT	0	FALSE	0	0.99	FALSE	1
887	403.17	10.1	GAS1-N95TT		1	VYAINTTLDHSECMK	VYAINTTLDHSEC[PPa]MK[887]	2	y	2	6	10.1	GAS1-N95TT	0	FALSE	0	0.99	FALSE	1
912	403.17	10.1	GAS1-N95TT		1	VYAINTTLDHSECMK	VYAINTTLDHSEC[PPa]MK[912]	2	y	2	6	10.1	GAS1-N95TT	0	FALSE	0	0.99	FALSE	1
937	403.17	10.1	GAS1-N95TT		1	VYAINTTLDHSECMK	VYAINTTLDHSEC[PPa]MK[937]	2	y	2	6	10.1	GAS1-N95TT	0	FALSE	0	0.99	FALSE	1
962	403.17	10.1	GAS1-N95TT		1	VYAINTTLDHSECMK	VYAINTTLDHSEC[PPa]MK[962]	2	y	2	6	10.1	GAS1-N95TT	0	FALSE	0	0.99	FALSE	1
987	403.17	10.1	GAS1-N95TT		1	VYAINTTLDHSECMK	VYAINTTLDHSEC[PPa]MK[987]	2	y	2	6	10.1	GAS1-N95TT	0	FALSE	0	0.99	FALSE	1
1012	403.17	10.1	GAS1-N95TT		1	VYAINTTLDHSECMK	VYAINTTLDHSEC[PPa]MK[1012]	2	y	2	6	10.1	GAS1-N95TT	0	FALSE	0	0.99	FALSE	1
1037	403.17	10.1	GAS1-N95TT		1	VYAINTTLDHSECMK	VYAINTTLDHSEC[PPa]MK[1037]	2	y	2	6	10.1	GAS1-N95TT	0	FALSE	0	0.99	FALSE	1
1062	403.17	10.1	GAS1-N95TT		1	VYAINTTLDHSECMK	VYAINTTLDHSEC[PPa]MK[1062]	2	y	2	6	10.1	GAS1-N95TT	0	FALSE	0	0.99	FALSE	1
1087	403.17	10.1	GAS1-N95TT		1	VYAINTTLDHSECMK	VYAINTTLDHSEC[PPa]MK[1087]	2	y	2	6	10.1	GAS1-N95TT	0	FALSE	0	0.99	FALSE	1
1112	403.17	10.1	GAS1-N95TT		1	VYAINTTLDHSECMK	VYAINTTLDHSEC[PPa]MK[1112]	2	y	2	6	10.1	GAS1-N95TT	0	FALSE	0	0.99	FALSE	1
1137	403.17	10.1	GAS1-N95TT		1	VYAINTTLDHSECMK	VYAINTTLDHSEC[PPa]MK[1137]	2	y	2	6	10.1	GAS1-N95TT	0	FALSE	0	0.99	FALSE	1
1162	403.17	10.1	GAS1-N95TT		1	VYAINTTLDHSECMK	VYAINTTLDHSEC[PPa]MK[1162]	2	y	2	6	10.1	GAS1-N95TT	0	FALSE	0	0.99	FALSE	1
1187	403.17	10.1	GAS1-N95TT		1	VYAINTTLDHSECMK	VYAINTTLDHSEC[PPa]MK[1187]	2	y	2	6	10.1	GAS1-N95TT	0	FALSE	0	0.99	FALSE	1
1212	403.17	10.1	GAS1-N95TT		1	VYAINTTLDHSECMK	VYAINTTLDHSEC[PPa]MK[1212]	2	y	2	6	10.1	GAS1-N95TT	0	FALSE	0	0.99	FALSE	1
1237	403.17	10.1	GAS1-N95TT		1	VYAINTTLDHSECMK	VYAINTTLDHSEC[PPa]MK[1237]	2	y	2	6	10.1	GAS1-N95TT	0	FALSE	0	0.99	FALSE	1
412.5	920.36	10.1	GAS1-N95TT		1	VYAINTTLDHSECMK	VYAINTTLDHSEC[PPa]MK[412]	2	y	1	7	10.1	GAS1-N95TT	0	FALSE	0	0.99	FALSE	1
437	920.36	10.1	GAS1-N95TT		1	VYAINTTLDHSECMK	VYAINTTLDHSEC[PPa]MK[437]	2	y	1	7	10.1	GAS1-N95TT	0	FALSE	0	0.99	FALSE	1
462	920.36	10.1	GAS1-N95TT		1	VYAINTTLDHSECMK	VYAINTTLDHSEC[PPa]MK[462]	2	y	1	7	10.1	GAS1-N95TT	0	FALSE	0	0.99	FALSE	1
487	920.36	10.1	GAS1-N95TT		1	VYAINTTLDHSECMK	VYAINTTLDHSEC[PPa]MK[487]	2	y	1	7	10.1	GAS1-N95TT	0	FALSE	0	0.99	FALSE	1
512	920.36	10.1	GAS1-N95TT		1	VYAINTTLDHSECMK	VYAINTTLDHSEC[PPa]MK[512]	2	y	1	7	10.1	GAS1-N95TT	0	FALSE	0	0.99	FALSE	1
537	920.36	10.1	GAS1-N95TT		1	VYAINTTLDHSECMK	VYAINTTLDHSEC[PPa]MK[537]	2	y	1	7	10.1	GAS1-N95TT	0	FALSE	0	0.99	FALSE	1
562	920.36	10.1	GAS1-N95TT		1	VYAINTTLDHSECMK	VYAINTTLDHSEC[PPa]MK[562]	2	y	1	7	10.1	GAS1-N95TT	0	FALSE	0	0.99	FALSE	1
587	920.36	10.61	GAS1-N95TT		1	VYAINTTLDHSECMK	VYAINTTLDHSEC[PPa]MK[587]	2	y	1	7	10.61	GAS1-N95TT	0	FALSE	0	0.99	FALSE	1
612	920.36	10.61	GAS1-N95TT		1	VYAINTTLDHSECMK	VYAINTTLDHSEC[PPa]MK[612]	2	y	1	7	10.61	GAS1-N95TT	0	FALSE	0	0.99	FALSE	1
637	920.36	10.1	GAS1-N95TT		1	VYAINTTLDHSECMK	VYAINTTLDHSEC[PPa]MK[637]	2	y	1	7	10.1	GAS1-N95TT	0	FALSE	0	0.99	FALSE	1
662	920.36	10.1	GAS1-N95TT		1	VYAINTTLDHSECMK	VYAINTTLDHSEC[PPa]MK[662]	2	y	1	7	10.1	GAS1-N95TT	0	FALSE	0	0.99	FALSE	1
687	920.36	10.1	GAS1-N95TT		1	VYAINTTLDHSECMK	VYAINTTLDHSEC[PPa]MK[687]	2	y	1	7	10.1	GAS1-N95TT	0	FALSE	0	0.99	FALSE	1
712	920.36	10.1	GAS1-N95TT		1	VYAINTTLDHSECMK	VYAINTTLDHSEC[PPa]MK[712]	2	y	1	7	10.1	GAS1-N95TT	0	FALSE	0	0.99	FALSE	1
737	920.36	10.1	GAS1-N95TT		1	VYAINTTLDHSECMK	VYAINTTLDHSEC[PPa]MK[737]	2	y	1	7	10.1	GAS1-N95TT	0	FALSE	0	0.99	FALSE	1
762	920.36	10.1	GAS1-N95TT		1	VYAINTTLDHSECMK	VYAINTTLDHSEC[PPa]MK[762]	2	y	1	7	10.1	GAS1-N95TT	0	FALSE	0	0.99	FALSE	1
787	920.36	10.1	GAS1-N95TT		1	VYAINTTLDHSECMK	VYAINTTLDHSEC[PPa]MK[787]	2	y	1	7	10.1	GAS1-N95TT	0	FALSE	0	0.99	FALSE	1
812	920.36	10.1	GAS1-N95TT		1	VYAINTTLDHSECMK	VYAINTTLDHSEC[PPa]MK[812]	2	y	1	7	10.1	GAS1-N95TT	0	FALSE	0	0.99	FALSE	1
837	920.36	10.1	GAS1-N95TT		1	VYAINTTLDHSECMK	VYAINTTLDHSEC[PPa]MK[837]	2	y	1	7	10.1	GAS1-N95TT	0	FALSE	0	0.99	FALSE	1
862	920.36	10.1	GAS1-N95TT		1	VYAINTTLDHSECMK	VYAINTTLDHSEC[PPa]MK[862]	2	y	1	7	10.1	GAS1-N95TT	0	FALSE	0	0.99	FALSE	1
887	920.36	10.1	GAS1-N95TT		1	VYAINTTLDHSECMK	VYAINTTLDHSEC[PPa]MK[887]	2	y	1	7	10.1	GAS1-N95TT	0	FALSE	0	0.99	FALSE	1
912	920.36	10.1	GAS1-N95TT		1	VYAINTTLDHSECMK	VYAINTTLDHSEC[PPa]MK[912]	2	y	1	7	10.1	GAS1-N95TT	0	FALSE	0	0.99	FALSE	1
937	920.36	10.1	GAS1-N95TT		1	VYAINTTLDHSECMK	VYAINTTLDHSEC[PPa]MK[937]	2	y	1	7	10.1	GAS1-N95TT	0	FALSE	0	0.99	FALSE	1
962	920.36	10.1	GAS1-N95TT		1	VYAINTTLDHSECMK	VYAINTTLDHSEC[PPa]MK[962]	2	y	1	7	10.1	GAS1-N95TT	0	FALSE	0	0.99	FALSE	1
987	920.36	10.1	GAS1-N95TT		1	VYAINTTLDHSECMK	VYAINTTLDHSEC[PPa]MK[987]	2	y	1	7	10.1	GAS1-N95TT	0	FALSE	0	0.99	FALSE	1
1012	920.36	10.1	GAS1-N95TT		1	VYAINTTLDHSECMK	VYAINTTLDHSEC[PPa]MK[1012]	2	y	1	7	10.1	GAS1-N95TT	0	FALSE	0	0.99	FALSE	1
1037	920.36	10.1	GAS1-N95TT		1	VYAINTTLDHSECMK	VYAINTTLDHSEC[PPa]MK[1037]	2	y	1	7	10.1	GAS1-N95TT	0	FALSE	0	0.99	FALSE	1
1062	920.36	10.1	GAS1-N95TT		1	VYAINTTLDHSECMK	VYAINTTLDHSEC[PPa]MK[1062]	2	y	1	7	10.1	GAS1-N95TT	0	FALSE	0	0.99	FALSE	1
1087	920.36	10.1	GAS1-N95TT		1	VYAINTTLDHSECMK	VYAINTTLDHSEC[PPa]MK[1087]	2	y	1	7	10.1	GAS1-N95TT	0	FALSE	0	0.99	FALSE	1
1112	920.36	10.1	GAS1-N95TT		1	VYAINTTLDHSECMK	VYAINTTLDHSEC[PPa]MK[1112]	2	y	1	7	10.1	GAS1-N95TT	0	FALSE	0	0.99	FALSE	1
1137	920.36	10.1	GAS1-N95TT		1	VYAINTTLDHSECMK	VYAINTTLDHSEC[PPa]MK[1137]	2	y	1	7	10.1	GAS1-N95TT	0	FALSE	0	0.99	FALSE	1
1162	920.36	10.1	GAS1-N95TT		1	VYAINTTLDHSECMK	VYAINTTLDHSEC[PPa]MK[1162]	2	y	1	7	10.1	GAS1-N95TT	0	FALSE	0	0.99	FALSE	1
1187	920.36	10.1	GAS1-N95TT		1	VYAINTTLDHSECMK	VYAINTTLDHSEC[PPa]MK[1187]	2	y	1	7	10.1	GAS1-N95TT	0	FALSE	0	0.99	FALSE	1
1212	920.36	10.1	GAS1-N95TT		1	VYAINTTLDHSECMK	VYAINTTLDHSEC[PPa]MK[1212]	2	y	1	7	10.1	GAS1-N95TT	0	FALSE	0	0.99	FALSE	1
1237	920.36	10.1	GAS1-N95TT		1	VYAINTTLDHSECMK	VYAINTTLDHSEC[PPa]MK[1237]	2	y	1	7	10.1	GAS1-N95TT	0	FALSE	0	0.99	FALSE	1
412.5	460.684	10.1	GAS1-N95TT		1	VYAINTTLDHSECMK	VYAINTTLDHSEC[PPa]MK[412]	2	y	2	7	10.1	GAS1-N95TT	0	FALSE	0	0.99	FALSE	1
437	460.684	10.1	GAS1-N95TT		1	VYAINTTLDHSECMK	VYAINTTLDHSEC[PPa]MK[437]	2	y	2	7	10.1	GAS1-N95TT	0	FALSE	0	0.99	FALSE	1
462	460.684	10.1	GAS1-N95TT		1	VYAINTTLDHSECMK	VYAINTTLDHSEC[PPa]MK[462]	2	y	2	7	10.1	GAS1-N95TT	0	FALSE	0	0.99	FALSE	1
487	460.684	10.1	GAS1-N95TT		1	VYAINTTLDHSECMK	VYAINTTLDHSEC[PPa]MK[487]	2	y	2	7	10.1	GAS1-N95TT	0	FALSE	0	0.99	FALSE	1
512	460.684	10.1	GAS1-N95TT		1	VYAINTTLDHSECMK	VYAINTTLDHSEC[PPa]MK[512]	2	y	2	7	10.1	GAS1-N95TT	0	FALSE	0	0.99	FALSE	1
537	460.684	10.1	GAS1-N95TT		1	VYAINTTLDHSECMK	VYAINTTLDHSEC[PPa]MK[537]	2	y	2	7	10.1	GAS1-N95TT	0	FALSE	0	0.99	FALSE	1
562	460.684	10.1	GAS1-N95TT		1	VYAINTTLDHSECMK	VYAINTTLDHSEC[PPa]MK[562]	2	y	2	7	10.1	GAS1-N95TT	0	FALSE	0	0.99	FALSE	1
587	460.684	10.61	GAS1-N95TT		1	VYAINTTLDHSECMK	VYAINTTLDHSEC[PPa]MK[587]	2	y	2	7	10.61	GAS1-N95TT	0	FALSE	0	0.99	FALSE	1
612	460.684	10.61	GAS1-N95TT		1	VYAINTTLDHSECMK	VYAINTTLDHSEC[PPa]MK[612]	2	y	2	7	10.61	GAS1-N95TT	0	FALSE	0	0.99	FALSE	1
637	460.684	10.1	GAS1-N95TT		1	VYAINTTLDHSECMK	VYAINTTLDHSEC[PPa]MK[637]	2	y	2	7	10.1	GAS1-N95TT	0	FALSE	0	0.99	FALSE	1
662	460.684	10.1	GAS1-N95TT		1	VYAINTTLDHSECMK	VYAINTTLDHSEC[PPa]MK[662]	2	y	2	7	10.1	GAS1-N95TT	0	FALSE	0	0.99	FALSE	1
687	460.684	10.1	GAS1-N95TT		1	VYAINTTLDHSECMK	VYAINTTLDHSEC[PPa]MK[687]	2	y	2	7	10.1	GAS1-N95TT	0	FALSE	0	0.99	FALSE	1
712	460.684	10.1	GAS1-N95TT		1	VYAINTTLDHSECMK	VYAINTTLDHSEC[PPa]MK[712]	2	y	2	7	10.1	GAS1-N95TT	0	FALSE	0	0.99	FALSE	1
737	460.684	10.1	GAS1-N95TT		1	VYAINTTLDHSECMK	VYAINTTLDHSEC[PPa]MK[737]	2	y	2	7	10.1	GAS1-N95TT	0	FALSE	0	0.99	FALSE	1
762	460.684	10.1	GAS1-N95TT		1	VYAINTTLDHSECMK	VYAINTTLDHSEC[PPa]MK[762]	2	y	2	7	10.1	GAS1-N95TT	0	FALSE	0	0.99	FALSE	1
787	460.684	10.1	GAS1-N95TT		1	VYAINTTLDHSECMK	VYAINTTLDHSEC[PPa]MK[787]	2	y	2	7	10.1	GAS1-N95TT	0	FALSE	0	0.99	FALSE	1
812	460.684	10.1	GAS1-N95TT		1	VYAINTTLDHSECMK	VYAINTTLDHSEC[PPa]MK[812]	2	y	2	7	10.1	GAS1-N95TT	0	FALSE	0	0.99	FALSE	1
837	460.684	10.1	GAS1-N95TT		1	VYAINTTLDHSECMK	VYAINTTLDHSEC[PPa]MK[837]	2	y	2	7	10.1	GAS1-N95TT	0	FALSE	0	0.99	FALSE	1
862	460.684	10.1	GAS1-N95TT		1	VYAINTTLDHSECMK	VYAINTTLDHSEC[PPa]MK[862]	2	y	2	7	10.1	GAS1-N95TT	0	FALSE	0	0.99	FALSE	1
887	460.684	10.1	GAS1-N95TT		1	VYAINTTLDHSECMK	VYAINTTLDHSEC[PPa]MK[887]	2	y	2	7	10.1	GAS1-N95TT	0	FALSE	0	0.99	FALSE	1
912	460.684	10.1	GAS1-N95TT		1	VYAINTTLDHSECMK	VYAINTTLDHSEC[PPa]MK[912]	2	y	2	7	10.1	GAS1-N95TT	0	FALSE	0	0.99	FALSE	1
937	460.684	10.1	GAS1-N95TT		1	VYAINTTLDHSECMK	VYAINTTLDHSEC[PPa]MK[937]	2	y	2	7	10.1	GAS1-N95TT	0	FALSE	0	0.99	FALSE	1
962	460.684	10.1	GAS1-N95TT		1	VYAINTTLDHSECMK	VYAINTTLDHSEC[PPa]MK[962]	2	y	2	7	10.1	GAS1-N95TT	0	FALSE	0	0.99	FALSE	1
987	460.684	10.1	GAS1-N95TT		1	VYAINTTLDHSECMK	VYAINTTLDHSEC[PPa]MK[987]	2	y	2	7	10.1	GAS1-N95TT	0	FALSE	0	0.99	FALSE	1
1012	460.684	10.1	GAS1-N95TT		1	VYAINTTLDHSECMK	VYAINTTLDHSEC[PPa]MK[1012]	2	y	2	7	10.1	GAS1-N95TT	0	FALSE	0	0.99	FALSE	1
1037	460.684	10.1	GAS1-N95TT		1	VYAINTTLDHSECMK	VYAINTTLDHSEC[PPa]MK[1037]	2	y	2	7	10.1	GAS1-N95TT	0	FALSE	0	0.99	FALSE	1
1062	460.684	10.1	GAS1-N95TT		1	VYAINTTLDHSECMK	VYAINTTLDHSEC[PPa]MK[1062]	2	y	2	7	10.1	GAS1-N95TT	0	FALSE	0	0.99	FALSE	1
1087	460.684	10.1	GAS1-N95TT		1	VYAINTTLDHSECMK	VYAINTTLDHSEC[PPa]MK[1087]	2	y	2	7	10.1	GAS1-N95TT	0	FALSE	0	0.99	FALSE	1
1112	460.684	10.1	GAS1-N95TT		1	VYAINTTLDHSECMK	VYAINTTLDHSEC[PPa]MK[1112]	2	y	2	7	10.1	GAS1-N95TT	0	FALSE	0	0.99	FALSE	1
1137	460.684	10.1	GAS1-N95TT		1	VYAINTTLDHSECMK	VYAINTTLDHSEC[PPa]MK[1137]	2	y	2	7	10.1	GAS1-N95TT	0	FALSE	0	0.99	FALSE	1
1162	460.684	10.1	GAS1-N95TT		1	VYAINTTLDHSECMK	VYAINTTLDHSEC[PPa]MK[1162]	2	y	2	7	10.1	GAS1-N95TT	0	FALSE	0	0.99	FALSE	1
1187	460.684	10.1	GAS1-N95TT		1	VYAINTTLDHSECMK	VYAINTTLDHSEC[PPa]MK[1187]	2	y	2	7	10.1	GAS1-N95TT	0	FALSE	0	0.99	FALSE	1
1212	460.684	10.1	GAS1-N95TT		1	VYAINTTLDHSECMK	VYAINTTLDHSEC[PPa]MK[1212]	2	y	2	7	10.1	GAS1-N95TT	0	FALSE	0	0.99	FALSE	1
1237	460.684	10.1	GAS1-N95TT		1	VYAINTTLDHSECMK	VYAINTTLDHSEC[PPa]MK[1237]	2	y	2	7	10.1	GAS1-N95TT	0	FALSE	0	0.99	FALSE	1
412.5	1033.44	10.1	GAS1-N95TT		1	VYAINTTLDHSECMK	VYAINTTLDHSEC[PPa]MK[412]	2	y	1	8	10.1	GAS1-N95TT	0	FALSE	0	0.99	FALSE	1
437	1033.44	10.1	GAS1-N95TT		1	VYAINTTLDHSECMK	VYAINTTLDHSEC[PPa]MK[437]	2	y	1	8	10.1	GAS1-N95TT	0	FALSE	0	0.99	FALSE	1
462	1033.44	10.1	GAS1-N95TT		1	VYAINTTLDHSECMK	VYAINTTLDHSEC[PPa]MK[462]	2	y	1	8	10.1	GAS1-N95TT	0	FALSE	0	0.99	FALSE	1
487	1033.44	10.1	GAS1-N95TT		1	VYAINTTLDHSECMK	VYAINTTLDHSEC[PPa]MK[487]	2	y	1	8	10.1	GAS1-N95TT	0	FALSE	0	0.99	FALSE	1
512	1033.44	10.1	GAS1-N95TT		1	VYAINTTLDHSECMK	VYAINTTLDHSEC[PPa]MK[512]	2	y	1	8	10.1	GAS1-N95TT	0	FALSE	0	0.99	FALSE	1
537	1033.44	10.1	GAS1-N95TT		1	VYAINTTLDHSECMK	VYAINTTLDHSEC[PPa]MK[537]	2	y	1	8	10.1	GAS1-N95TT	0	FALSE	0	0.99	FALSE	1
562	1033.44	10.1	GAS1-N95TT		1	VYAINTTLDHSECMK	VYAINTTLDHSEC[PPa]MK[562]	2	y	1	8	10.1	GAS1-N95TT	0	FALSE	0	0.99	FALSE	1
587	1033.44	10.61	GAS1-N95TT		1	VYAINTTLDHSECMK	VYAINTTLDHSEC[PPa]MK[587]	2	y	1	8	10.61	GAS1-N95TT	0	FALSE	0	0.99	FALSE	1
612	1033.44	10.61	GAS1-N95TT		1	VYAINTTLDHSECMK	VYAINTTLDHSEC[PPa]MK[612]	2	y	1	8	10.61	GAS1-N95TT	0	FALSE	0	0.99	FALSE	1
637	1033.44	10.1	GAS1-N95TT		1	VYAINTTLDHSECMK	VYAINTTLDHSEC[PPa]MK[637]	2	y	1	8	10.1	GAS1-N95TT	0	FALSE	0	0.99	FALSE	1
662	1033.44	10.1	GAS1-N95TT		1	VYAINTTLDHSECMK	VYAINTTLDHSEC[PPa]MK[662]	2	y	1	8	10.1	GAS1-N95TT	0	FALSE	0	0.99	FALSE	1
687	1033.44	10.1	GAS1-N95TT		1	VYAINTTLDHSECMK	VYAINTTLDHSEC[PPa]MK[687]	2	y	1	8	10.1	GAS1-N95TT	0	FALSE	0	0.99	FALSE	1
712	1033.44	10.1	GAS1-N95TT		1	VYAINTTLDHSECMK	VYAINTTLDHSEC[PPa]MK[712]	2	y	1	8	10.1	GAS1-N95TT	0	FALSE	0	0.99	FALSE	1
737	1033.44	10.1	GAS1-N95TT		1	VYAINTTLDHSECMK	VYAINTTLDHSEC[PPa]MK[737]	2	y	1	8	10.1	GAS1-N95TT	0	FALSE	0	0.99	FALSE	1
762	1033.44	10.1	GAS1-N95TT		1	VYAINTTLDHSECMK	VYAINTTLDHSEC[PPa]MK[762]	2	y	1	8	10.1	GAS1-N95TT	0	FALSE	0	0.99	FALSE	1
787	1033.44	10.1	GAS1-N95TT		1	VYAINTTLDHSECMK	VYAINTTLDHSEC[PPa]MK[787]	2	y	1	8	10.1	GAS1-N95TT	0	FALSE	0	0.99	FALSE	1
812	1033.44	10.1	GAS1-N95TT		1	VYAINTTLDHSECMK	VYAINTTLDHSEC[PPa]MK[812]	2	y	1	8	10.1	GAS1-N95TT	0	FALSE	0	0.99	FALSE	1
837	1033.44	10.1	GAS1-N95TT		1	VYAINTTLDHSECMK	VYAINTTLDHSEC[PPa]MK[837]	2	y	1	8	10.1	GAS1-N95TT	0	FALSE	0	0.99	FALSE	1
862	1033.44	10.1	GAS1-N95TT		1	VYAINTTLDHSECMK	VYAINTTLDHSEC[PPa]MK[862]	2	y	1	8	10.1	GAS1-N95TT	0	FALSE	0	0.99	FALSE	1
887	1033.44	10.1	GAS1-N95TT		1	VYAINTTLDHSECMK	VYAINTTLDHSEC[PPa]MK[887]	2	y	1	8	10.1	GAS1-N95TT	0	FALSE	0	0.99	FALSE	1
912	1033.44	10.1	GAS1-N95TT		1	VYAINTTLDHSECMK	VYAINTTLDHSEC[PPa]MK[912]	2	y	1	8	10.1	GAS1-N95TT	0	FALSE	0	0.99	FALSE	1
937	1033.44	10.1	GAS1-N95TT		1	VYAINTTLDHSECMK	VYAINTTLDHSEC[PPa]MK[937]	2	y	1	8	10.1	GAS1-N95TT	0	FALSE	0	0.99	FALSE	1
962	1033.44	10.1	GAS1-N95TT		1	VYAINTTLDHSECMK	VYAINTTLDHSEC[PPa]MK[962]	2	y	1	8	10.1	GAS1-N95TT	0	FALSE	0	0.99	FALSE	1
987	1033.44	10.1	GAS1-N95TT		1	VYAINTTLDHSECMK	VYAINTTLDHSEC[PPa]MK[987]	2	y	1	8	10.1	GAS1-N95TT	0	FALSE	0	0.99	FALSE	1
1012	1033.44	10.1	GAS1-N95TT		1	VYAINTTLDHSECMK	VYAINTTLDHSEC[PPa]MK[1012]	2	y	1	8	10.1	GAS1-N95TT	0	FALSE	0	0.99	FALSE	1
1037	1033.44	10.1	GAS1-N95TT		1	VYAINTTLDHSECMK	VYAINTTLDHSEC[PPa]MK[1037]	2	y	1	8	10.1	GAS1-N95TT	0	FALSE	0	0.99	FALSE	1
1062	1033.44	10.1	GAS1-N95TT		1	VYAINTTLDHSECMK	VYAINTTLDHSEC[PPa]MK[1062]	2	y	1	8	10.1	GAS1-N95TT	0	FALSE	0	0.99	FALSE	1
1087	1033.44	10.1	GAS1-N95TT		1	VYAINTTLDHSECMK	VYAINTTLDHSEC[PPa]MK[1087]	2	y	1	8	10.1	GAS1-N95TT	0	FALSE	0	0.99	FALSE	1
1112	1033.44	10.1	GAS1-N95TT		1	VYAINTTLDHSECMK	VYAINTTLDHSEC[PPa]MK[1112]	2	y	1	8	10.1	GAS1-N95TT	0	FALSE	0	0.99	FALSE	1
1137	1033.44	10.1	GAS1-N95TT		1	VYAINTTLDHSECMK	VYAINTTLDHSEC[PPa]MK[1137]	2	y	1	8	10.1	GAS1-N95TT	0	FALSE	0	0.99	FALSE	1
1162	1033.44	10.1	GAS1-N95TT		1	VYAINTTLDHSECMK	VYAINTTLDHSEC[PPa]MK[1162]	2	y	1	8	10.1	GAS1-N95TT	0	FALSE	0	0.99	FALSE	1
1187	1033.44	10.1	GAS1-N95TT		1	VYAINTTLDHSECMK	VYAINTTLDHSEC[PPa]MK[1187]	2	y	1	8	10.1	GAS1-N95TT	0	FALSE	0	0.99	FALSE	1
1212	1033.44	10.1	GAS1-N95TT		1	VYAINTTLDHSECMK	VYAINTTLDHSEC[PPa]MK[1212]	2	y	1	8	10.1	GAS1-N95TT	0	FALSE	0	0.99	FALSE	1
1237	1033.44	10.1	GAS1-N95TT		1	VYAINTTLDHSECMK	VYAINTTLDHSEC[PPa]MK[1237]	2	y	1	8	10.1	GAS1-N95TT	0	FALSE	0	0.99	FALSE	1
412.5	517.226	10.1	GAS1-N95TT		1	VYAINTTLDHSECMK	VYAINTTLDHSEC[PPa]MK[412]	2	y	2	8	10.1	GAS1-N95TT	0	FALSE	0	0.99	FALSE	1
437	517.226	10.1	GAS1-N95TT		1	VYAINTTLDHSECMK	VYAINTTLDHSEC[PPa]MK[437]	2	y	2	8	10.1	GAS1-N95TT	0	FALSE	0	0.99	FALSE	1
462	517.226	10.1	GAS1-N95TT		1	VYAINTTLDHSECMK	VYAINTTLDHSEC[PPa]MK[462]	2	y	2	8	10.1	GAS1-N95TT	0	FALSE	0	0.99	FALSE	1
487	517.226	10.1	GAS1-N95TT		1	VYAINTTLDHSECMK	VYAINTTLDHSEC[PPa]MK[487]	2	y	2	8	10.1	GAS1-N95TT	0	FALSE	0	0.99	FALSE	1
512	517.226	10.1	GAS1-N95TT		1	VYAINTTLDHSECMK	VYAINTTLDHSEC[PPa]MK[512]	2	y	2	8	10.1	GAS1-N95TT	0	FALSE	0	0.99	FALSE	1
537	517.226	10.1	GAS1-N95TT		1	VYAINTTLDHSECMK	VYAINTTLDHSEC[PPa]MK[537]	2	y	2	8	10.1	GAS1-N95TT	0	FALSE	0	0.99	FALSE	1
562	517.226	10.1	GAS1-N95TT		1	VYAINTTLDHSECMK	VYAINTTLDHSEC[PPa]MK[562]	2	y	2	8	10.1	GAS1-N95TT	0	FALSE	0	0.99	FALSE	1
587	517.226	10.61	GAS1-N95TT		1	VYAINTTLDHSECMK	VYAINTTLDHSEC[PPa]MK[587]	2	y	2	8	10.61	GAS1-N95TT	0	FALSE	0	0.99	FALSE	1
612	517.226	10.61	GAS1-N95TT		1	VYAINTTLDHSECMK	VYAINTTLDHSEC[PPa]MK[612]	2	y	2	8	10.61	GAS1-N95TT	0	FALSE	0	0.99	FALSE	1
637	517.226	10.1	GAS1-N95TT		1	VYAINTTLDHSECMK	VYAINTTLDHSEC[PPa]MK[637]	2	y	2	8	10.1	GAS1-N95TT	0	FALSE	0	0.99	FALSE	1
662	517.226	10.1	GAS1-N95TT		1	VYAINTTLDHSECMK	VYAINTTLDHSEC[PPa]MK[662]	2	y	2	8	10.1	GAS1-N95TT	0	FALSE	0	0.99	FALSE	1
687	517.226	10.1	GAS1-N95TT		1	VYAINTTLDHSECMK	VYAINTTLDHSEC[PPa]MK[687]	2	y	2	8	10.1	GAS1-N95TT	0	FALSE	0	0.99	FALSE	1
712	517.226	10.1	GAS1-N95TT		1	VYAINTTLDHSECMK	VYAINTTLDHSEC[PPa]MK[712]	2	y	2	8	10.1	GAS1-N95TT	0	FALSE	0	0.99	FALSE	1
737	517.226	10.1	GAS1-N95TT		1	VYAINTTLDHSECMK	VYAINTTLDHSEC[PPa]MK[737]	2	y	2	8	10.1	GAS1-N95TT	0	FALSE	0	0.99	FALSE	1
762	517.226	10.1	GAS1-N95TT		1	VYAINTTLDHSECMK	VYAINTTLDHSEC[PPa]MK[762]	2	y	2	8	10.1	GAS1-N95TT	0	FALSE	0	0.99	FALSE	1
787	517.226	10.1	GAS1-N95TT		1	VYAINTTLDHSECMK	VYAINTTLDHSEC[PPa]MK[787]	2	y	2	8	10.1	GAS1-N95TT	0	FALSE	0	0.99	FALSE	1
812	517.226	10.1	GAS1-N95TT		1	VYAINTTLDHSECMK	VYAINTTLDHSEC[PPa]MK[812]	2	y	2	8	10.1	GAS1-N95TT	0	FALSE	0	0.99	FALSE	1
837	517.226	10.1	GAS1-N95TT		1	VYAINTTLDHSECMK	VYAINTTLDHSEC[PPa]MK[837]	2	y	2	8	10.1	GAS1-N95TT	0	FALSE	0	0.99	FALSE	1
862	517.226	10.1	GAS1-N95TT		1	VYAINTTLDHSECMK	VYAINTTLDHSEC[PPa]MK[862]	2	y	2	8	10.1	GAS1-N95TT	0	FALSE	0	0.99	FALSE	1
887	517.226	10.1	GAS1-N95TT		1	VYAINTTLDHSECMK	VYAINTTLDHSEC[PPa]MK[887]	2	y	2	8	10.1	GAS1-N95TT	0	FALSE	0	0.99	FALSE	1
912	517.226	10.1	GAS1-N95TT		1	VYAINTTLDHSECMK	VYAINTTLDHSEC[PPa]MK[912]	2	y	2	8	10.1	GAS1-N95TT	0	FALSE	0	0.99	FALSE	1
937	517.226	10.1	GAS1-N95TT		1	VYAINTTLDHSECMK	VYAINTTLDHSEC[PPa]MK[937]	2	y	2	8	10.1	GAS1-N95TT	0	FALSE	0	0.99	FALSE	1
962	517.226	10.1	GAS1-N95TT		1	VYAINTTLDHSECMK	VYAINTTLDHSEC[PPa]MK[962]	2	y	2	8	10.1	GAS1-N95TT	0	FALSE	0	0.99	FALSE	1
987	517.226	10.1	GAS1-N95TT		1	VYAINTTLDHSECMK	VYAINTTLDHSEC[PPa]MK[987]	2	y	2	8	10.1	GAS1-N95TT	0	FALSE	0	0.99	FALSE	1
1012	517.226	10.1	GAS1-N95TT		1	VYAINTTLDHSECMK	VYAINTTLDHSEC[PPa]MK[1012]	2	y	2	8	10.1	GAS1-N95TT	0	FALSE	0	0.99	FALSE	1
1037	517.226	10.1	GAS1-N95TT		1	VYAINTTLDHSECMK	VYAINTTLDHSEC[PPa]MK[1037]	2	y	2	8	10.1	GAS1-N95TT	0	FALSE	0	0.99	FALSE	1
1062	517.226	10.1	GAS1-N95TT		1	VYAINTTLDHSECMK	VYAINTTLDHSEC[PPa]MK[1062]	2	y	2	8	10.1	GAS1-N95TT	0	FALSE	0	0.99	FALSE	1
1087	517.226	10.1	GAS1-N95TT		1	VYAINTTLDHSECMK	VYAINTTLDHSEC[PPa]MK[1087]	2	y	2	8	10.1	GAS1-N95TT	0	FALSE	0	0.99	FALSE	1
1112	517.226	10.1	GAS1-N95TT		1	VYAINTTLDHSECMK	VYAINTTLDHSEC[PPa]MK[1112]	2	y	2	8	10.1	GAS1-N95TT	0	FALSE	0	0.99	FALSE	1
1137	517.226	10.1	GAS1-N95TT		1	VYAINTTLDHSECMK	VYAINTTLDHSEC[PPa]MK[1137]	2	y	2	8	10.1	GAS1-N95TT	0	FALSE	0	0.99	FALSE	1
1162	517.226	10.1	GAS1-N95TT		1	VYAINTTLDHSECMK	VYAINTTLDHSEC[PPa]MK[1162]	2	y	2	8	10.1	GAS1-N95TT	0	FALSE	0	0.99	FALSE	1
1187	517.226	10.1	GAS1-N95TT		1	VYAINTTLDHSECMK	VYAINTTLDHSEC[PPa]MK[1187]	2	y	2	8	10.1	GAS1-N95TT	0	FALSE	0	0.99	FALSE	1
1212	517.226	10.1	GAS1-N95TT		1	VYAINTTLDHSECMK	VYAINTTLDHSEC[PPa]MK[1212]	2	y	2	8	10.1	GAS1-N95TT	0	FALSE	0	0.99	FALSE	1
1237	517.226	10.1	GAS1-N95TT		1	VYAINTTLDHSECMK	VYAINTTLDHSEC[PPa]MK[1237]	2	y	2	8	10.1	GAS1-N95TT	0	FALSE	0	0.99	FALSE	1
412.5	1134.49	10.1	GAS1-N95TT		1	VYAINTTLDHSECMK	VYAINTTLDHSEC[PPa]MK[412]	2	y	1	9	10.1	GAS1-N95TT	0	FALSE	0	0.99	FALSE	1
437	1134.49	10.1	GAS1-N95TT		1	VYAINTTLDHSECMK	VYAINTTLDHSEC[PPa]MK[437]	2	y	1	9	10.1	GAS1-N95TT	0	FALSE	0	0.99	FALSE	1
462	1134.49	10.1	GAS1-N95TT		1	VYAINTTLDHSECMK	VYAINTTLDHSEC[PPa]MK[462]	2	y	1	9	10.1	GAS1-N95TT	0	FALSE	0	0.99	FALSE	1
487	1134.49	10.1	GAS1-N95TT		1	VYAINTTLDHSECMK	VYAINTTLDHSEC[PPa]MK[487]	2	y	1	9	10.1	GAS1-N95TT	0	FALSE	0	0.99	FALSE	1
512	1134.49	10.1	GAS1-N95TT		1	VYAINTTLDHSECMK	VYAINTTLDHSEC[PPa]MK[512]	2	y	1	9	10.1	GAS1-N95TT	0	FALSE	0	0.99	FALSE	1
537	1134.49	10.1	GAS1-N95TT		1	VYAINTTLDHSECMK	VYAINTTLDHSEC[PPa]MK[537]	2	y	1	9	10.1	GAS1-N95TT	0	FALSE	0	0.99	FALSE	1
562	1134.49	10.1	GAS1-N95TT		1	VYAINTTLDHSECMK	VYAINTTLDHSEC[PPa]MK[562]	2	y	1	9	10.1	GAS1-N95TT	0	FALSE	0	0.99	FALSE	1
587	1134.49	10.61	GAS1-N95TT		1	VYAINTTLDHSECMK	VYAINTTLDHSEC[PPa]MK[587]	2	y	1	9	10.61	GAS1-N95TT	0	FALSE	0	0.99	FALSE	1
612	1134.49	10.61	GAS1-N95TT		1	VYAINTTLDHSECMK	VYAINTTLDHSEC[PPa]MK[612]	2	y	1	9	10.61	GAS1-N95TT	0	FALSE	0	0.99	FALSE	1
637	1134.49	10.1	GAS1-N95TT		1	VYAINTTLDHSECMK	VYAINTTLDHSEC[PPa]MK[637]	2	y	1	9	10.1	GAS1-N95TT	0	FALSE	0	0.99	FALSE	1
662	1134.49	10.1	GAS1-N95TT		1	VYAINTTLDHSECMK	VYAINTTLDHSEC[PPa]MK[662]	2	y	1	9	10.1	GAS1-N95TT	0	FALSE	0	0.99	FALSE	1
687	1134.49	10.1	GAS1-N95TT		1	VYAINTTLDHSECMK	VYAINTTLDHSEC[PPa]MK[687]	2	y	1	9	10.1	GAS1-N95TT	0	FALSE	0	0.99	FALSE	1
712	1134.49	10.1	GAS1-N95TT		1	VYAINTTLDHSECMK	VYAINTTLDHSEC[PPa]MK[712]	2	y	1	9	10.1	GAS1-N95TT	0	FALSE	0	0.99	FALSE	1
737	1134.49	10.1	GAS1-N95TT		1	VYAINTTLDHSECMK	VYAINTTLDHSEC[PPa]MK[737]	2	y	1	9	10.1	GAS1-N95TT	0	FALSE	0	0.99	FALSE	1
762	1134.49	10.1	GAS1-N95TT		1	VYAINTTLDHSECMK	VYAINTTLDHSEC[PPa]MK[762]	2	y	1	9	10.1	GAS1-N95TT	0	FALSE	0	0.99	FALSE	1
787	1134.49	10.1	GAS1-N95TT		1	VYAINTTLDHSECMK	VYAINTTLDHSEC[PPa]MK[787]	2	y	1	9	10.1	GAS1-N95TT	0	FALSE	0	0.99	FALSE	1
812	1134.49	10.1	GAS1-N95TT		1	VYAINTTLDHSECMK	VYAINTTLDHSEC[PPa]MK[812]	2	y	1	9	10.1	GAS1-N95TT	0	FALSE	0	0.99	FALSE	1
837	1134.49	10.1	GAS1-N95TT		1	VYAINTTLDHSECMK	VYAINTTLDHSEC[PPa]MK[837]	2	y	1	9	10.1	GAS1-N95TT	0	FALSE	0	0.99	FALSE	1
862	1134.49	10.1	GAS1-N95TT		1	VYAINTTLDHSECMK	VYAINTTLDHSEC[PPa]MK[862]	2	y	1	9	10.1	GAS1-N95TT	0	FALSE	0	0.99	FALSE	1
887	1134.49	10.1	GAS1-N95TT		1	VYAINTTLDHSECMK	VYAINTTLDHSEC[PPa]MK[887]	2	y	1	9	10.1	GAS1-N95TT	0	FALSE	0	0.99	FALSE	1
912	1134.49	10.1	GAS1-N95TT		1	VYAINTTLDHSECMK	VYAINTTLDHSEC[PPa]MK[912]	2	y	1	9	10.1	GAS1-N95TT	0	FALSE	0	0.99	FALSE	1
937	1134.49	10.1	GAS1-N95TT		1	VYAINTTLDHSECMK	VYAINTTLDHSEC[PPa]MK[937]	2	y	1	9	10.1	GAS1-N95TT	0	FALSE	0	0.99	FALSE	1
962	1134.49	10.1	GAS1-N95TT		1	VYAINTTLDHSECMK	VYAINTTLDHSEC[PPa]MK[962]	2	y	1	9	10.1	GAS1-N95TT	0	FALSE	0	0.99	FALSE	1
987	1134.49	10.1	GAS1-N95TT		1	VYAINTTLDHSECMK	VYAINTTLDHSEC[PPa]MK[987]	2	y	1	9	10.1	GAS1-N95TT	0	FALSE	0	0.99	FALSE	1
1012	1134.49	10.1	GAS1-N95TT		1	VYAINTTLDHSECMK	VYAINTTLDHSEC[PPa]MK[1012]	2	y	1	9	10.1	GAS1-N95TT	0	FALSE	0	0.99	FALSE	1
1037	1134.49	10.1	GAS1-N95TT		1	VYAINTTLDHSECMK	VYAINTTLDHSEC[PPa]MK[1037]	2	y	1	9	10.1	GAS1-N95TT	0	FALSE	0	0.99	FALSE	1
1062	1134.49	10.1	GAS1-N95TT		1	VYAINTTLDHSECMK	VYAINTTLDHSEC[PPa]MK[1062]	2	y	1	9	10.1	GAS1-N95TT	0	FALSE	0	0.99	FALSE	1
1087	1134.49	10.1	GAS1-N95TT		1	VYAINTTLDHSECMK	VYAINTTLDHSEC[PPa]MK[1087]	2	y	1	9	10.1	GAS1-N95TT	0	FALSE	0	0.99	FALSE	1
1112	1134.49	10.1	GAS1-N95TT		1	VYAINTTLDHSECMK	VYAINTTLDHSEC[PPa]MK[1112]	2	y	1	9	10.1	GAS1-N95TT	0	FALSE	0	0.99	FALSE	1
1137	1134.49	10.1	GAS1-N95TT		1	VYAINTTLDHSECMK	VYAINTTLDHSEC[PPa]MK[1137]	2	y	1	9	10.1	GAS1-N95TT	0	FALSE	0	0.99	FALSE	1
1162	1134.49	10.1	GAS1-N95TT		1	VYAINTTLDHSECMK	VYAINTTLDHSEC[PPa]MK[1162]	2	y	1	9	10.1	GAS1-N95TT	0	FALSE	0	0.99	FALSE	1
1187	1134.49	10.1	GAS1-N95TT		1	VYAINTTLDHSECMK	VYAINTTLDHSEC[PPa]MK[1187]	2	y	1	9	10.1	GAS1-N95TT	0	FALSE	0	0.99	FALSE	1
1212	1134.49	10.1	GAS1-N95TT		1	VYAINTTLDHSECMK	VYAINTTLDHSEC[PPa]MK[1212]	2	y	1	9	10.1	GAS1-N95TT	0	FALSE	0	0.99	FALSE	1
1237	1134.49	10.1	GAS1-N95TT		1	VYAINTTLDHSECMK	VYAINTTLDHSEC[PPa]MK[1237]	2	y	1	9	10.1	GAS1-N95TT	0	FALSE	0	0.99	FALSE	1
412.5	567.75	10.1	GAS1-N95TT		1	VYAINTTLDHSECMK	VYAINTTLDHSEC[PPa]MK[412]	2	y	2	9	10.1	GAS1-N95TT	0	FALSE	0	0.99	FALSE	1
437	567.75	10.1	GAS1-N95TT		1	VYAINTTLDHSECMK	VYAINTTLDHSEC[PPa]MK[437]	2	y	2	9	10.1	GAS1-N95TT	0	FALSE	0	0.99	FALSE	1
462	567.75	10.1	GAS1-N95TT		1	VYAINTTLDHSECMK	VYAINTTLDHSEC[PPa]MK[462]	2	y	2	9	10.1	GAS1-N95TT	0	FALSE	0	0.99	FALSE	1
487	567.75	10.1	GAS1-N95TT		1	VYAINTTLDHSECMK	VYAINTTLDHSEC[PPa]MK[487]	2	y	2	9	10.1	GAS1-N95TT	0	FALSE	0	0.99	FALSE	1
512	567.75	10.1	GAS1-N95TT		1	VYAINTTLDHSECMK	VYAINTTLDHSEC[PPa]MK[512]	2	y	2	9	10.1	GAS1-N95TT	0	FALSE	0	0.99	FALSE	1
537	567.75	10.1	GAS1-N95TT		1	VYAINTTLDHSECMK	VYAINTTLDHSEC[PPa]MK[537]	2	y	2	9	10.1	GAS1-N95TT	0	FALSE	0	0.99	FALSE	1
562	567.75	10.1	GAS1-N95TT		1	VYAINTTLDHSECMK	VYAINTTLDHSEC[PPa]MK[562]	2	y	2	9	10.1	GAS1-N95TT	0	FALSE	0	0.99	FALSE	1
587	567.75	10.61	GAS1-N95TT		1	VYAINTTLDHSECMK	VYAINTTLDHSEC[PPa]MK[587]	2	y	2	9	10.61	GAS1-N95TT	0	FALSE	0	0.99	FALSE	1
612	567.75	10.61	GAS1-N95TT		1	VYAINTTLDHSECMK	VYAINTTLDHSEC[PPa]MK[612]	2	y	2	9	10.61	GAS1-N95TT	0	FALSE	0	0.99	FALSE	1
637	567.75	10.1	GAS1-N95TT		1	VYAINTTLDHSECMK	VYAINTTLDHSEC[PPa]MK[637]	2	y	2	9	10.1	GAS1-N95TT	0	FALSE	0	0.99	FALSE	1
662	567.75	10.1	GAS1-N95TT		1	VYAINTTLDHSECMK	VYAINTTLDHSEC[PPa]MK[662]	2	y	2	9	10.1	GAS1-N95TT	0	FALSE	0	0.99	FALSE	1
687	567.75	10.1	GAS1-N95TT		1	VYAINTTLDHSECMK	VYAINTTLDHSEC[PPa]MK[687]	2	y	2	9	10.1	GAS1-N95TT	0	FALSE	0	0.99	FALSE	1
712	567.75	10.1	GAS1-N95TT		1	VYAINTTLDHSECMK	VYAINTTLDHSEC[PPa]MK[712]	2	y	2	9	10.1	GAS1-N95TT	0	FALSE	0	0.99	FALSE	1
737	567.75	10.1	GAS1-N95TT		1	VYAINTTLDHSECMK	VYAINTTLDHSEC[PPa]MK[737]	2	y	2	9	10.1	GAS1-N95TT	0	FALSE	0	0.99	FALSE	1
762	567.75	10.1	GAS1-N95TT		1	VYAINTTLDHSECMK	VYAINTTLDHSEC[PPa]MK[762]	2	y	2	9	10.1	GAS1-N95TT	0	FALSE	0	0.99	FALSE	1
787	567.75	10.1	GAS1-N95TT		1	VYAINTTLDHSECMK	VYAINTTLDHSEC[PPa]MK[787]	2	y	2	9	10.1	GAS1-N95TT	0	FALSE	0	0.99	FALSE	1
812	567.75	10.1	GAS1-N95TT		1	VYAINTTLDHSECMK	VYAINTTLDHSEC[PPa]MK[812]	2	y	2	9	10.1	GAS1-N95TT	0	FALSE	0	0.99	FALSE	1
837	567.75	10.1	GAS1-N95TT		1	VYAINTTLDHSECMK	VYAINTTLDHSEC[PPa]MK[837]	2	y	2	9	10.1	GAS1-N95TT	0	FALSE	0	0.99	FALSE	1
862	567.75	10.1	GAS1-N95TT		1	VYAINTTLDHSECMK	VYAINTTLDHSEC[PPa]MK[862]	2	y	2	9	10.1	GAS1-N95TT	0	FALSE	0	0.99	FALSE	1
887	567.75	10.1	GAS1-N95TT		1	VYAINTTLDHSECMK	VYAINTTLDHSEC[PPa]MK[887]	2	y	2	9	10.1	GAS1-N95TT	0	FALSE	0	0.99	FALSE	1
912	567.75	10.1	GAS1-N95TT		1	VYAINTTLDHSECMK	VYAINTTLDHSEC[PPa]MK[912]	2	y	2	9	10.1	GAS1-N95TT	0	FALSE	0	0.99	FALSE	1
937	567.75	10.1	GAS1-N95TT		1	VYAINTTLDHSECMK	VYAINTTLDHSEC[PPa]MK[937]	2	y	2	9	10.1	GAS1-N95TT	0	FALSE	0	0.99	FALSE	1
962	567.75	10.1	GAS1-N95TT		1	VYAINTTLDHSECMK	VYAINTTLDHSEC[PPa]MK[962]	2	y	2	9	10.1	GAS1-N95TT	0	FALSE	0	0.99	FALSE	1
987	567.75	10.1	GAS1-N95TT		1	VYAINTTLDHSECMK	VYAINTTLDHSEC[PPa]MK[987]	2	y	2	9	10.1	GAS1-N95TT	0	FALSE	0	0.99	FALSE	1
1012	567.75	10.1	GAS1-N95TT		1	VYAINTTLDHSECMK	VYAINTTLDHSEC[PPa]MK[1012]	2	y	2	9	10.1	GAS1-N95TT	0	FALSE	0	0.99	FALSE	1
1037	567.75	10.1	GAS1-N95TT		1	VYAINTTLDHSECMK	VYAINTTLDHSEC[PPa]MK[1037]	2	y	2	9	10.1	GAS1-N95TT	0	FALSE	0	0.99	FALSE	1
1062	567.75	10.1	GAS1-N95TT		1	VYAINTTLDHSECMK	VYAINTTLDHSEC[PPa]MK[1062]	2	y	2	9	10.1	GAS1-N95TT	0	FALSE	0	0.99	FALSE	1
1087	567.75	10.1	GAS1-N95TT		1	VYAINTTLDHSECMK	VYAINTTLDHSEC[PPa]MK[1087]	2	y	2	9	10.1	GAS1-N95TT	0	FALSE	0	0.99	FALSE	1
1112	567.75	10.1	GAS1-N95TT		1	VYAINTTLDHSECMK	VYAINTTLDHSEC[PPa]MK[1112]	2	y	2	9	10.1	GAS1-N95TT	0	FALSE	0	0.99	FALSE	1
1137	567.75	10.1	GAS1-N95TT		1	VYAINTTLDHSECMK	VYAINTTLDHSEC[PPa]MK[1137]	2	y	2	9	10.1	GAS1-N95TT	0	FALSE	0	0.99	FALSE	1
1162	567.75	10.1	GAS1-N95TT		1	VYAINTTLDHSECMK	VYAINTTLDHSEC[PPa]MK[1162]	2	y	2	9	10.1	GAS1-N95TT	0	FALSE	0	0.99	FALSE	1
1187	567.75	10.1	GAS1-N95TT		1	VYAINTTLDHSECMK	VYAINTTLDHSEC[PPa]MK[1187]	2	y	2	9	10.1	GAS1-N95TT	0	FALSE	0	0.99	FALSE	1
1212	567.75	10.1	GAS1-N95TT		1	VYAINTTLDHSECMK	VYAINTTLDHSEC[PPa]MK[1212]	2	y	2	9	10.1	GAS1-N95TT	0	FALSE	0	0.99	FALSE	1
1237	567.75	10.1	GAS1-N95TT		1	VYAINTTLDHSECMK	VYAINTTLDHSEC[PPa]MK[1237]	2	y	2	9	10.1	GAS1-N95TT	0	FALSE	0	0.99	FALSE	1
412.5	1235.54	10.1	GAS1-N95TT		1	VYAINTTLDHSECMK	VYAINTTLDHSEC[PPa]MK[412]	2	y	1	10	10.1	GAS1-N95TT	0	FALSE	0	0.99	FALSE	1
437	1235.54	10.1	GAS1-N95TT		1	VYAINTTLDHSECMK	VYAINTTLDHSEC[PPa]MK[437]	2	y	1	10	10.1	GAS1-N95TT	0	FALSE	0	0.99	FALSE	1
462	1235.54	10.1	GAS1-N95TT		1	VYAINTTLDHSECMK	VYAINTTLDHSEC[PPa]MK[462]	2	y	1	10	10.1	GAS1-N95TT	0	FALSE	0	0.99	FALSE	1
487	1235.54	10.1	GAS1-N95TT		1	VYAINTTLDHSECMK	VYAINTTLDHSEC[PPa]MK[487]	2	y	1	10	10.1	GAS1-N95TT	0	FALSE	0	0.99	FALSE	1
512	1235.54	10.1	GAS1-N95TT		1	VYAINTTLDHSECMK	VYAINTTLDHSEC[PPa]MK[512]	2	y	1	10	10.1	GAS1-N95TT	0	FALSE	0	0.99	FALSE	1
537	1235.54	10.1	GAS1-N95TT		1	VYAINTTLDHSECMK	VYAINTTLDHSEC[PPa]MK[537]	2	y	1	10	10.1	GAS1-N95TT	0	FALSE	0	0.99	FALSE	1
562	1235.54	10.1	GAS1-N95TT		1	VYAINTTLDHSECMK	VYAINTTLDHSEC[PPa]MK[562]	2	y	1	10	10.1	GAS1-N95TT	0	FALSE	0	0.99	FALSE	1
587	1235.54	10.61	GAS1-N95TT		1	VYAINTTLDHSECMK	VYAINTTLDHSEC[PPa]MK[587]	2	y	1	10	10.61	GAS1-N95TT	0	FALSE	0	0.99	FALSE	1
612	1235.54	10.61	GAS1-N95TT		1	VYAINTTLDHSECMK	VYAINTTLDHSEC[PPa]MK[612]	2	y	1	10	10.61	GAS1-N95TT	0	FALSE	0	0.99	FALSE	1
637	1235.54	10.1	GAS1-N95TT		1	VYAINTTLDHSECMK	VYAINTTLDHSEC[PPa]MK[637]	2	y	1	10	10.1	GAS1-N95TT	0	FALSE	0	0.99	FALSE	1
662	1235.54	10.1	GAS1-N95TT		1	VYAINTTLDHSECMK	VYAINTTLDHSEC[PPa]MK[662]	2	y	1	10	10.1	GAS1-N95TT	0	FALSE	0	0.99	FALSE	1
687	1235.54	10.1	GAS1-N95TT		1	VYAINTTLDHSECMK	VYAINTTLDHSEC[PPa]MK[687]	2	y	1	10	10.1	GAS1-N95TT	0	FALSE	0	0.99	FALSE	1
712	1235.54	10.1	GAS1-N95TT		1	VYAINTTLDHSECMK	VYAINTTLDHSEC[PPa]MK[712]	2	y	1	10	10.1	GAS1-N95TT	0	FALSE	0	0.99	FALSE	1
737	1235.54	10.1	GAS1-N95TT		1	VYAINTTLDHSECMK	VYAINTTLDHSEC[PPa]MK[737]	2	y	1	10	10.1	GAS1-N95TT	0	FALSE	0	0.99	FALSE	1
762	1235.54	10.1	GAS1-N95TT		1	VYAINTTLDHSECMK	VYAINTTLDHSEC[PPa]MK[762]	2	y	1	10	10.1	GAS1-N95TT	0	FALSE	0	0.99	FALSE	1
787	1235.54	10.1	GAS1-N95TT		1	VYAINTTLDHSECMK	VYAINTTLDHSEC[PPa]MK[787]	2	y	1	10	10.1	GAS1-N95TT	0	FALSE	0	0.99	FALSE	1
812	1235.54	10.1	GAS1-N95TT		1	VYAINTTLDHSECMK	VYAINTTLDHSEC[PPa]MK[812]	2	y	1	10	10.1	GAS1-N95TT	0	FALSE	0	0.99	FALSE	1
837	1235.54	10.1	GAS1-N95TT		1	VYAINTTLDHSECMK	VYAINTTLDHSEC[PPa]MK[837]	2	y	1	10	10.1	GAS1-N95TT	0	FALSE	0	0.99	FALSE	1
862	1235.54	10.1	GAS1-N95TT		1	VYAINTTLDHSECMK	VYAINTTLDHSEC[PPa]MK[862]	2	y	1	10	10.1	GAS1-N95TT	0	FALSE	0	0.99	FALSE	1
887	1235.54	10.1	GAS1-N95TT		1	VYAINTTLDHSECMK	VYAINTTLDHSEC[PPa]MK[887]	2	y	1	10	10.1	GAS1-N95TT	0	FALSE	0	0.99	FALSE	1
912	1235.54	10.1	GAS1-N95TT		1	VYAINTTLDHSECMK	VYAINTTLDHSEC[PPa]MK[912]	2	y	1	10	10.1	GAS1-N95TT	0	FALSE	0	0.99	FALSE	1
937	1235.54	10.1	GAS1-N95TT		1	VYAINTTLDHSECMK	VYAINTTLDHSEC[PPa]MK[937]	2	y	1	10	10.1	GAS1-N95TT	0	FALSE	0	0.99	FALSE	1
962	1235.54	10.1	GAS1-N95TT		1	VYAINTTLDHSECMK	VYAINTTLDHSEC[PPa]MK[962]	2	y	1	10	10.1	GAS1-N95TT	0	FALSE	0	0.99	FALSE	1
987	1235.54	10.1	GAS1-N95TT		1	VYAINTTLDHSECMK	VYAINTTLDHSEC[PPa]MK[987]	2	y	1	10	10.1	GAS1-N95TT	0	FALSE	0	0.99	FALSE	1
1012	1235.54	10.1	GAS1-N95TT		1	VYAINTTLDHSECMK	VYAINTTLDHSEC[PPa]MK[1012]	2	y	1	10	10.1	GAS1-N95TT	0	FALSE	0	0.99	FALSE	1
1037	1235.54	10.1	GAS1-N95TT		1	VYAINTTLDHSECMK	VYAINTTLDHSEC[PPa]MK[1037]	2	y	1	10	10.1	GAS1-N95TT	0	FALSE	0	0.99	FALSE	1
1062	1235.54	10.1	GAS1-N95TT		1	VYAINTTLDHSECMK	VYAINTTLDHSEC[PPa]MK[1062]	2	y	1	10	10.1	GAS1-N95TT	0	FALSE	0	0.99	FALSE	1
1087	1235.54	10.1	GAS1-N95TT		1	VYAINTTLDHSECMK	VYAINTTLDHSEC[PPa]MK[1087]	2	y	1	10	10.1	GAS1-N95TT	0	FALSE	0	0.99	FALSE	1
1112	1235.54	10.1	GAS1-N95TT		1	VYAINTTLDHSECMK	VYAINTTLDHSEC[PPa]MK[1112]	2	y	1	10	10.1	GAS1-N95TT	0	FALSE	0	0.99	FALSE	1
1137	1235.54	10.1	GAS1-N95TT		1	VYAINTTLDHSECMK	VYAINTTLDHSEC[PPa]MK[1137]	2	y	1	10	10.1	GAS1-N95TT	0	FALSE	0	0.99	FALSE	1
1162	1235.54	10.1	GAS1-N95TT		1	VYAINTTLDHSECMK	VYAINTTLDHSEC[PPa]MK[1162]	2	y	1	10	10.1	GAS1-N95TT	0	FALSE	0	0.99	FALSE	1
1187	1235.54	10.1	GAS1-N95TT		1	VYAINTTLDHSECMK	VYAINTTLDHSEC[PPa]MK[1187]	2	y	1	10	10.1	GAS1-N95TT	0	FALSE	0	0.99	FALSE	1
1212	1235.54	10.1	GAS1-N95TT		1	VYAINTTLDHSECMK	VYAINTTLDHSEC[PPa]MK[1212]	2	y	1	10	10.1	GAS1-N95TT	0	FALSE	0	0.99	FALSE	1
1237	1235.54	10.1	GAS1-N95TT		1	VYAINTTLDHSECMK	VYAINTTLDHSEC[PPa]MK[1237]	2	y	1	10	10.1	GAS1-N95TT	0	FALSE	0	0.99	FALSE	1
412.5	618.273	10.1	GAS1-N95TT		1	VYAINTTLDHSECMK	VYAINTTLDHSEC[PPa]MK[412]	2	y	2	10	10.1	GAS1-N95TT	0	FALSE	0	0.99	FALSE	1
437	618.273	10.1	GAS1-N95TT		1	VYAINTTLDHSECMK	VYAINTTLDHSEC[PPa]MK[437]	2	y	2	10	10.1	GAS1-N95TT	0	FALSE	0	0.99	FALSE	1
462	618.273	10.1	GAS1-N95TT		1	VYAINTTLDHSECMK	VYAINTTLDHSEC[PPa]MK[462]	2	y	2	10	10.1	GAS1-N95TT	0	FALSE	0	0.99	FALSE	1
487	618.273	10.1	GAS1-N95TT		1	VYAINTTLDHSECMK	VYAINTTLDHSEC[PPa]MK[487]	2	y	2	10	10.1	GAS1-N95TT	0	FALSE	0	0.99	FALSE	1
512	618.273	10.1	GAS1-N95TT		1	VYAINTTLDHSECMK	VYAINTTLDHSEC[PPa]MK[512]	2	y	2	10	10.1	GAS1-N95TT	0	FALSE	0	0.99	FALSE	1
537	618.273	10.1	GAS1-N95TT		1	VYAINTTLDHSECMK	VYAINTTLDHSEC[PPa]MK[537]	2	y	2	10	10.1	GAS1-N95TT	0	FALSE	0	0.99	FALSE	1
562	618.273	10.1	GAS1-N95TT		1	VYAINTTLDHSECMK	VYAINTTLDHSEC[PPa]MK[562]	2	y	2	10	10.1	GAS1-N95TT	0	FALSE	0	0.99	FALSE	1
587	618.273	10.61	GAS1-N95TT		1	VYAINTTLDHSECMK	VYAINTTLDHSEC[PPa]MK[587]	2	y	2	10	10.61	GAS1-N95TT	0	FALSE	0	0.99	FALSE	1
612	618.273	10.61	GAS1-N95TT		1	VYAINTTLDHSECMK	VYAINTTLDHSEC[PPa]MK[612]	2	y	2	10	10.61	GAS1-N95TT	0	FALSE	0	0.99	FALSE	1
637	618.273	10.1	GAS1-N95TT		1	VYAINTTLDHSECMK	VYAINTTLDHSEC[PPa]MK[637]	2	y	2	10	10.1	GAS1-N95TT	0	FALSE	0	0.99	FALSE	1
662	618.273	10.1	GAS1-N95TT		1	VYAINTTLDHSECMK	VYAINTTLDHSEC[PPa]MK[662]	2	y	2	10	10.1	GAS1-N95TT	0	FALSE	0	0.99	FALSE	1
687	618.273	10.1	GAS1-N95TT		1	VYAINTTLDHSECMK	VYAINTTLDHSEC[PPa]MK[687]	2	y	2	10	10.1	GAS1-N95TT	0	FALSE	0	0.99	FALSE	1
712	618.273	10.1	GAS1-N95TT		1	VYAINTTLDHSECMK	VYAINTTLDHSEC[PPa]MK[712]	2	y	2	10	10.1	GAS1-N95TT	0	FALSE	0	0.99	FALSE	1
737	618.273	10.1	GAS1-N95TT		1	VYAINTTLDHSECMK	VYAINTTLDHSEC[PPa]MK[737]	2	y	2	10	10.1	GAS1-N95TT	0	FALSE	0	0.99	FALSE	1
762	618.273	10.1	GAS1-N95TT		1	VYAINTTLDHSECMK	VYAINTTLDHSEC[PPa]MK[762]	2	y	2	10	10.1	GAS1-N95TT	0	FALSE	0	0.99	FALSE	1
787	618.273	10.1	GAS1-N95TT		1	VYAINTTLDHSECMK	VYAINTTLDHSEC[PPa]MK[787]	2	y	2	10	10.1	GAS1-N95TT	0	FALSE	0	0.99	FALSE	1
812	618.273	10.1	GAS1-N95TT		1	VYAINTTLDHSECMK	VYAINTTLDHSEC[PPa]MK[812]	2	y	2	10	10.1	GAS1-N95TT	0	FALSE	0	0.99	FALSE	1
837	618.273	10.1	GAS1-N95TT		1	VYAINTTLDHSECMK	VYAINTTLDHSEC[PPa]MK[837]	2	y	2	10	10.1	GAS1-N95TT	0	FALSE	0	0.99	FALSE	1
862	618.273	10.1	GAS1-N95TT		1	VYAINTTLDHSECMK	VYAINTTLDHSEC[PPa]MK[862]	2	y	2	10	10.1	GAS1-N95TT	0	FALSE	0	0.99	FALSE	1
887	618.273	10.1	GAS1-N95TT		1	VYAINTTLDHSECMK	VYAINTTLDHSEC[PPa]MK[887]	2	y	2	10	10.1	GAS1-N95TT	0	FALSE	0	0.99	FALSE	1
912	618.273	10.1	GAS1-N95TT		1	VYAINTTLDHSECMK	VYAINTTLDHSEC[PPa]MK[912]	2	y	2	10	10.1	GAS1-N95TT	0	FALSE	0	0.99	FALSE	1
937	618.273	10.1	GAS1-N95TT		1	VYAINTTLDHSECMK	VYAINTTLDHSEC[PPa]MK[937]	2	y	2	10	10.1	GAS1-N95TT	0	FALSE	0	0.99	FALSE	1
962	618.273	10.1	GAS1-N95TT		1	VYAINTTLDHSECMK	VYAINTTLDHSEC[PPa]MK[962]	2	y	2	10	10.1	GAS1-N95TT	0	FALSE	0	0.99	FALSE	1
987	618.273	10.1	GAS1-N95TT		1	VYAINTTLDHSECMK	VYAINTTLDHSEC[PPa]MK[987]	2	y	2	10	10.1	GAS1-N95TT	0	FALSE	0	0.99	FALSE	1
1012	618.273	10.1	GAS1-N95TT		1	VYAINTTLDHSECMK	VYAINTTLDHSEC[PPa]MK[1012]	2	y	2	10	10.1	GAS1-N95TT	0	FALSE	0	0.99	FALSE	1
1037	618.273	10.1	GAS1-N95TT		1	VYAINTTLDHSECMK	VYAINTTLDHSEC[PPa]MK[1037]	2	y	2	10	10.1	GAS1-N95TT	0	FALSE	0	0.99	FALSE	1
1062	618.273	10.1	GAS1-N95TT		1	VYAINTTLDHSECMK	VYAINTTLDHSEC[PPa]MK[1062]	2	y	2	10	10.1	GAS1-N95TT	0	FALSE	0	0.99	FALSE	1
1087	618.273	10.1	GAS1-N95TT		1	VYAINTTLDHSECMK	VYAINTTLDHSEC[PPa]MK[1087]	2	y	2	10	10.1	GAS1-N95TT	0	FALSE	0	0.99	FALSE	1
1112	618.273	10.1	GAS1-N95TT		1	VYAINTTLDHSECMK	VYAINTTLDHSEC[PPa]MK[1112]	2	y	2	10	10.1	GAS1-N95TT	0	FALSE	0	0.99	FALSE	1
1137	618.273	10.1	GAS1-N95TT		1	VYAINTTLDHSECMK	VYAINTTLDHSEC[PPa]MK[1137]	2	y	2	10	10.1	GAS1-N95TT	0	FALSE	0	0.99	FALSE	1
1162	618.273	10.1	GAS1-N95TT		1	VYAINTTLDHSECMK	VYAINTTLDHSEC[PPa]MK[1162]	2	y	2	10	10.1	GAS1-N95TT	0	FALSE	0	0.99	FALSE	1
1187	618.273	10.1	GAS1-N95TT		1	VYAINTTLDHSECMK	VYAINTTLDHSEC[PPa]MK[1187]	2	y	2	10	10.1	GAS1-N95TT	0	FALSE	0	0.99	FALSE	1
1212	618.273	10.1	GAS1-N95TT		1	VYAINTTLDHSECMK	VYAINTTLDHSEC[PPa]MK[1212]	2	y	2	10	10.1	GAS1-N95TT	0	FALSE	0	0.99	FALSE	1
1237	618.273	10.1	GAS1-N95TT		1	VYAINTTLDHSECMK	VYAINTTLDHSEC[PPa]MK[1237]	2	y	2	10	10.1	GAS1-N95TT	0	FALSE	0	0.99	FALSE	1
412.5	272.172	14.5	GAS1-N253LS		1	NLSIPVFFSEYGCNEVTPR	NLSIPVFFSEYGC[PPa]NEVTPR[412]	2	y	1	2	14.5	GAS1-N253LS	0	FALSE	0	0.99	FALSE	1
437	272.172	14.5	GAS1-N253LS		1	NLSIPVFFSEYGCNEVTPR	NLSIPVFFSEYGC[PPa]NEVTPR[437]	2	y	1	2	14.5	GAS1-N253LS	0	FALSE	0	0.99	FALSE	1
462	272.172	14.5	GAS1-N253LS		1	NLSIPVFFSEYGCNEVTPR	NLSIPVFFSEYGC[PPa]NEVTPR[462]	2	y	1	2	14.5	GAS1-N253LS	0	FALSE	0	0.99	FALSE	1
487	272.172	14.5	GAS1-N253LS		1	NLSIPVFFSEYGCNEVTPR	NLSIPVFFSEYGC[PPa]NEVTPR[487]	2	y	1	2	14.5	GAS1-N253LS	0	FALSE	0	0.99	FALSE	1
512	272.172	14.5	GAS1-N253LS		1	NLSIPVFFSEYGCNEVTPR	NLSIPVFFSEYGC[PPa]NEVTPR[512]	2	y	1	2	14.5	GAS1-N253LS	0	FALSE	0	0.99	FALSE	1
537	272.172	14.5	GAS1-N253LS		1	NLSIPVFFSEYGCNEVTPR	NLSIPVFFSEYGC[PPa]NEVTPR[537]	2	y	1	2	14.5	GAS1-N253LS	0	FALSE	0	0.99	FALSE	1
562	272.172	14.5	GAS1-N253LS		1	NLSIPVFFSEYGCNEVTPR	NLSIPVFFSEYGC[PPa]NEVTPR[562]	2	y	1	2	14.5	GAS1-N253LS	0	FALSE	0	0.99	FALSE	1
587	272.172	14.5	GAS1-N253LS		1	NLSIPVFFSEYGCNEVTPR	NLSIPVFFSEYGC[PPa]NEVTPR[587]	2	y	1	2	14.5	GAS1-N253LS	0	FALSE	0	0.99	FALSE	1
612	272.172	14.5	GAS1-N253LS		1	NLSIPVFFSEYGCNEVTPR	NLSIPVFFSEYGC[PPa]NEVTPR[612]	2	y	1	2	14.5	GAS1-N253LS	0	FALSE	0	0.99	FALSE	1
637	272.172	14.5	GAS1-N253LS		1	NLSIPVFFSEYGCNEVTPR	NLSIPVFFSEYGC[PPa]NEVTPR[637]	2	y	1	2	14.5	GAS1-N253LS	0	FALSE	0	0.99	FALSE	1
662	272.172	14.5	GAS1-N253LS		1	NLSIPVFFSEYGCNEVTPR	NLSIPVFFSEYGC[PPa]NEVTPR[662]	2	y	1	2	14.5	GAS1-N253LS	0	FALSE	0	0.99	FALSE	1
687	272.172	14.5	GAS1-N253LS		1	NLSIPVFFSEYGCNEVTPR	NLSIPVFFSEYGC[PPa]NEVTPR[687]	2	y	1	2	14.5	GAS1-N253LS	0	FALSE	0	0.99	FALSE	1
712	272.172	14.5	GAS1-N253LS		1	NLSIPVFFSEYGCNEVTPR	NLSIPVFFSEYGC[PPa]NEVTPR[712]	2	y	1	2	14.5	GAS1-N253LS	0	FALSE	0	0.99	FALSE	1
737	272.172	15.23	GAS1-N253LS		1	NLSIPVFFSEYGCNEVTPR	NLSIPVFFSEYGC[PPa]NEVTPR[737]	2	y	1	2	15.23	GAS1-N253LS	0	FALSE	0	0.99	FALSE	1
762	272.172	14.5	GAS1-N253LS		1	NLSIPVFFSEYGCNEVTPR	NLSIPVFFSEYGC[PPa]NEVTPR[762]	2	y	1	2	14.5	GAS1-N253LS	0	FALSE	0	0.99	FALSE	1
787	272.172	14.5	GAS1-N253LS		1	NLSIPVFFSEYGCNEVTPR	NLSIPVFFSEYGC[PPa]NEVTPR[787]	2	y	1	2	14.5	GAS1-N253LS	0	FALSE	0	0.99	FALSE	1
812	272.172	14.5	GAS1-N253LS		1	NLSIPVFFSEYGCNEVTPR	NLSIPVFFSEYGC[PPa]NEVTPR[812]	2	y	1	2	14.5	GAS1-N253LS	0	FALSE	0	0.99	FALSE	1
837	272.172	14.5	GAS1-N253LS		1	NLSIPVFFSEYGCNEVTPR	NLSIPVFFSEYGC[PPa]NEVTPR[837]	2	y	1	2	14.5	GAS1-N253LS	0	FALSE	0	0.99	FALSE	1
862	272.172	14.5	GAS1-N253LS		1	NLSIPVFFSEYGCNEVTPR	NLSIPVFFSEYGC[PPa]NEVTPR[862]	2	y	1	2	14.5	GAS1-N253LS	0	FALSE	0	0.99	FALSE	1
887	272.172	14.5	GAS1-N253LS		1	NLSIPVFFSEYGCNEVTPR	NLSIPVFFSEYGC[PPa]NEVTPR[887]	2	y	1	2	14.5	GAS1-N253LS	0	FALSE	0	0.99	FALSE	1
912	272.172	14.5	GAS1-N253LS		1	NLSIPVFFSEYGCNEVTPR	NLSIPVFFSEYGC[PPa]NEVTPR[912]	2	y	1	2	14.5	GAS1-N253LS	0	FALSE	0	0.99	FALSE	1
937	272.172	14.5	GAS1-N253LS		1	NLSIPVFFSEYGCNEVTPR	NLSIPVFFSEYGC[PPa]NEVTPR[937]	2	y	1	2	14.5	GAS1-N253LS	0	FALSE	0	0.99	FALSE	1
962	272.172	14.5	GAS1-N253LS		1	NLSIPVFFSEYGCNEVTPR	NLSIPVFFSEYGC[PPa]NEVTPR[962]	2	y	1	2	14.5	GAS1-N253LS	0	FALSE	0	0.99	FALSE	1
987	272.172	14.5	GAS1-N253LS		1	NLSIPVFFSEYGCNEVTPR	NLSIPVFFSEYGC[PPa]NEVTPR[987]	2	y	1	2	14.5	GAS1-N253LS	0	FALSE	0	0.99	FALSE	1
1012	272.172	14.5	GAS1-N253LS		1	NLSIPVFFSEYGCNEVTPR	NLSIPVFFSEYGC[PPa]NEVTPR[1012]	2	y	1	2	14.5	GAS1-N253LS	0	FALSE	0	0.99	FALSE	1
1037	272.172	14.5	GAS1-N253LS		1	NLSIPVFFSEYGCNEVTPR	NLSIPVFFSEYGC[PPa]NEVTPR[1037]	2	y	1	2	14.5	GAS1-N253LS	0	FALSE	0	0.99	FALSE	1
1062	272.172	14.5	GAS1-N253LS		1	NLSIPVFFSEYGCNEVTPR	NLSIPVFFSEYGC[PPa]NEVTPR[1062]	2	y	1	2	14.5	GAS1-N253LS	0	FALSE	0	0.99	FALSE	1
1087	272.172	14.5	GAS1-N253LS		1	NLSIPVFFSEYGCNEVTPR	NLSIPVFFSEYGC[PPa]NEVTPR[1087]	2	y	1	2	14.5	GAS1-N253LS	0	FALSE	0	0.99	FALSE	1
1112	272.172	14.5	GAS1-N253LS		1	NLSIPVFFSEYGCNEVTPR	NLSIPVFFSEYGC[PPa]NEVTPR[1112]	2	y	1	2	14.5	GAS1-N253LS	0	FALSE	0	0.99	FALSE	1
1137	272.172	14.5	GAS1-N253LS		1	NLSIPVFFSEYGCNEVTPR	NLSIPVFFSEYGC[PPa]NEVTPR[1137]	2	y	1	2	14.5	GAS1-N253LS	0	FALSE	0	0.99	FALSE	1
1162	272.172	14.5	GAS1-N253LS		1	NLSIPVFFSEYGCNEVTPR	NLSIPVFFSEYGC[PPa]NEVTPR[1162]	2	y	1	2	14.5	GAS1-N253LS	0	FALSE	0	0.99	FALSE	1
1187	272.172	14.5	GAS1-N253LS		1	NLSIPVFFSEYGCNEVTPR	NLSIPVFFSEYGC[PPa]NEVTPR[1187]	2	y	1	2	14.5	GAS1-N253LS	0	FALSE	0	0.99	FALSE	1
1212	272.172	14.5	GAS1-N253LS		1	NLSIPVFFSEYGCNEVTPR	NLSIPVFFSEYGC[PPa]NEVTPR[1212]	2	y	1	2	14.5	GAS1-N253LS	0	FALSE	0	0.99	FALSE	1
1237	272.172	14.5	GAS1-N253LS		1	NLSIPVFFSEYGCNEVTPR	NLSIPVFFSEYGC[PPa]NEVTPR[1237]	2	y	1	2	14.5	GAS1-N253LS	0	FALSE	0	0.99	FALSE	1
412.5	136.589	14.5	GAS1-N253LS		1	NLSIPVFFSEYGCNEVTPR	NLSIPVFFSEYGC[PPa]NEVTPR[412]	2	y	2	2	14.5	GAS1-N253LS	0	FALSE	0	0.99	FALSE	1
437	136.589	14.5	GAS1-N253LS		1	NLSIPVFFSEYGCNEVTPR	NLSIPVFFSEYGC[PPa]NEVTPR[437]	2	y	2	2	14.5	GAS1-N253LS	0	FALSE	0	0.99	FALSE	1
462	136.589	14.5	GAS1-N253LS		1	NLSIPVFFSEYGCNEVTPR	NLSIPVFFSEYGC[PPa]NEVTPR[462]	2	y	2	2	14.5	GAS1-N253LS	0	FALSE	0	0.99	FALSE	1
487	136.589	14.5	GAS1-N253LS		1	NLSIPVFFSEYGCNEVTPR	NLSIPVFFSEYGC[PPa]NEVTPR[487]	2	y	2	2	14.5	GAS1-N253LS	0	FALSE	0	0.99	FALSE	1
512	136.589	14.5	GAS1-N253LS		1	NLSIPVFFSEYGCNEVTPR	NLSIPVFFSEYGC[PPa]NEVTPR[512]	2	y	2	2	14.5	GAS1-N253LS	0	FALSE	0	0.99	FALSE	1
537	136.589	14.5	GAS1-N253LS		1	NLSIPVFFSEYGCNEVTPR	NLSIPVFFSEYGC[PPa]NEVTPR[537]	2	y	2	2	14.5	GAS1-N253LS	0	FALSE	0	0.99	FALSE	1
562	136.589	14.5	GAS1-N253LS		1	NLSIPVFFSEYGCNEVTPR	NLSIPVFFSEYGC[PPa]NEVTPR[562]	2	y	2	2	14.5	GAS1-N253LS	0	FALSE	0	0.99	FALSE	1
587	136.589	14.5	GAS1-N253LS		1	NLSIPVFFSEYGCNEVTPR	NLSIPVFFSEYGC[PPa]NEVTPR[587]	2	y	2	2	14.5	GAS1-N253LS	0	FALSE	0	0.99	FALSE	1
612	136.589	14.5	GAS1-N253LS		1	NLSIPVFFSEYGCNEVTPR	NLSIPVFFSEYGC[PPa]NEVTPR[612]	2	y	2	2	14.5	GAS1-N253LS	0	FALSE	0	0.99	FALSE	1
637	136.589	14.5	GAS1-N253LS		1	NLSIPVFFSEYGCNEVTPR	NLSIPVFFSEYGC[PPa]NEVTPR[637]	2	y	2	2	14.5	GAS1-N253LS	0	FALSE	0	0.99	FALSE	1
662	136.589	14.5	GAS1-N253LS		1	NLSIPVFFSEYGCNEVTPR	NLSIPVFFSEYGC[PPa]NEVTPR[662]	2	y	2	2	14.5	GAS1-N253LS	0	FALSE	0	0.99	FALSE	1
687	136.589	14.5	GAS1-N253LS		1	NLSIPVFFSEYGCNEVTPR	NLSIPVFFSEYGC[PPa]NEVTPR[687]	2	y	2	2	14.5	GAS1-N253LS	0	FALSE	0	0.99	FALSE	1
712	136.589	14.5	GAS1-N253LS		1	NLSIPVFFSEYGCNEVTPR	NLSIPVFFSEYGC[PPa]NEVTPR[712]	2	y	2	2	14.5	GAS1-N253LS	0	FALSE	0	0.99	FALSE	1
737	136.589	15.23	GAS1-N253LS		1	NLSIPVFFSEYGCNEVTPR	NLSIPVFFSEYGC[PPa]NEVTPR[737]	2	y	2	2	15.23	GAS1-N253LS	0	FALSE	0	0.99	FALSE	1
762	136.589	14.5	GAS1-N253LS		1	NLSIPVFFSEYGCNEVTPR	NLSIPVFFSEYGC[PPa]NEVTPR[762]	2	y	2	2	14.5	GAS1-N253LS	0	FALSE	0	0.99	FALSE	1
787	136.589	14.5	GAS1-N253LS		1	NLSIPVFFSEYGCNEVTPR	NLSIPVFFSEYGC[PPa]NEVTPR[787]	2	y	2	2	14.5	GAS1-N253LS	0	FALSE	0	0.99	FALSE	1
812	136.589	14.5	GAS1-N253LS		1	NLSIPVFFSEYGCNEVTPR	NLSIPVFFSEYGC[PPa]NEVTPR[812]	2	y	2	2	14.5	GAS1-N253LS	0	FALSE	0	0.99	FALSE	1
837	136.589	14.5	GAS1-N253LS		1	NLSIPVFFSEYGCNEVTPR	NLSIPVFFSEYGC[PPa]NEVTPR[837]	2	y	2	2	14.5	GAS1-N253LS	0	FALSE	0	0.99	FALSE	1
862	136.589	14.5	GAS1-N253LS		1	NLSIPVFFSEYGCNEVTPR	NLSIPVFFSEYGC[PPa]NEVTPR[862]	2	y	2	2	14.5	GAS1-N253LS	0	FALSE	0	0.99	FALSE	1
887	136.589	14.5	GAS1-N253LS		1	NLSIPVFFSEYGCNEVTPR	NLSIPVFFSEYGC[PPa]NEVTPR[887]	2	y	2	2	14.5	GAS1-N253LS	0	FALSE	0	0.99	FALSE	1
912	136.589	14.5	GAS1-N253LS		1	NLSIPVFFSEYGCNEVTPR	NLSIPVFFSEYGC[PPa]NEVTPR[912]	2	y	2	2	14.5	GAS1-N253LS	0	FALSE	0	0.99	FALSE	1
937	136.589	14.5	GAS1-N253LS		1	NLSIPVFFSEYGCNEVTPR	NLSIPVFFSEYGC[PPa]NEVTPR[937]	2	y	2	2	14.5	GAS1-N253LS	0	FALSE	0	0.99	FALSE	1
962	136.589	14.5	GAS1-N253LS		1	NLSIPVFFSEYGCNEVTPR	NLSIPVFFSEYGC[PPa]NEVTPR[962]	2	y	2	2	14.5	GAS1-N253LS	0	FALSE	0	0.99	FALSE	1
987	136.589	14.5	GAS1-N253LS		1	NLSIPVFFSEYGCNEVTPR	NLSIPVFFSEYGC[PPa]NEVTPR[987]	2	y	2	2	14.5	GAS1-N253LS	0	FALSE	0	0.99	FALSE	1
1012	136.589	14.5	GAS1-N253LS		1	NLSIPVFFSEYGCNEVTPR	NLSIPVFFSEYGC[PPa]NEVTPR[1012]	2	y	2	2	14.5	GAS1-N253LS	0	FALSE	0	0.99	FALSE	1
1037	136.589	14.5	GAS1-N253LS		1	NLSIPVFFSEYGCNEVTPR	NLSIPVFFSEYGC[PPa]NEVTPR[1037]	2	y	2	2	14.5	GAS1-N253LS	0	FALSE	0	0.99	FALSE	1
1062	136.589	14.5	GAS1-N253LS		1	NLSIPVFFSEYGCNEVTPR	NLSIPVFFSEYGC[PPa]NEVTPR[1062]	2	y	2	2	14.5	GAS1-N253LS	0	FALSE	0	0.99	FALSE	1
1087	136.589	14.5	GAS1-N253LS		1	NLSIPVFFSEYGCNEVTPR	NLSIPVFFSEYGC[PPa]NEVTPR[1087]	2	y	2	2	14.5	GAS1-N253LS	0	FALSE	0	0.99	FALSE	1
1112	136.589	14.5	GAS1-N253LS		1	NLSIPVFFSEYGCNEVTPR	NLSIPVFFSEYGC[PPa]NEVTPR[1112]	2	y	2	2	14.5	GAS1-N253LS	0	FALSE	0	0.99	FALSE	1
1137	136.589	14.5	GAS1-N253LS		1	NLSIPVFFSEYGCNEVTPR	NLSIPVFFSEYGC[PPa]NEVTPR[1137]	2	y	2	2	14.5	GAS1-N253LS	0	FALSE	0	0.99	FALSE	1
1162	136.589	14.5	GAS1-N253LS		1	NLSIPVFFSEYGCNEVTPR	NLSIPVFFSEYGC[PPa]NEVTPR[1162]	2	y	2	2	14.5	GAS1-N253LS	0	FALSE	0	0.99	FALSE	1
1187	136.589	14.5	GAS1-N253LS		1	NLSIPVFFSEYGCNEVTPR	NLSIPVFFSEYGC[PPa]NEVTPR[1187]	2	y	2	2	14.5	GAS1-N253LS	0	FALSE	0	0.99	FALSE	1
1212	136.589	14.5	GAS1-N253LS		1	NLSIPVFFSEYGCNEVTPR	NLSIPVFFSEYGC[PPa]NEVTPR[1212]	2	y	2	2	14.5	GAS1-N253LS	0	FALSE	0	0.99	FALSE	1
1237	136.589	14.5	GAS1-N253LS		1	NLSIPVFFSEYGCNEVTPR	NLSIPVFFSEYGC[PPa]NEVTPR[1237]	2	y	2	2	14.5	GAS1-N253LS	0	FALSE	0	0.99	FALSE	1
412.5	373.219	14.5	GAS1-N253LS		1	NLSIPVFFSEYGCNEVTPR	NLSIPVFFSEYGC[PPa]NEVTPR[412]	2	y	1	3	14.5	GAS1-N253LS	0	FALSE	0	0.99	FALSE	1
437	373.219	14.5	GAS1-N253LS		1	NLSIPVFFSEYGCNEVTPR	NLSIPVFFSEYGC[PPa]NEVTPR[437]	2	y	1	3	14.5	GAS1-N253LS	0	FALSE	0	0.99	FALSE	1
462	373.219	14.5	GAS1-N253LS		1	NLSIPVFFSEYGCNEVTPR	NLSIPVFFSEYGC[PPa]NEVTPR[462]	2	y	1	3	14.5	GAS1-N253LS	0	FALSE	0	0.99	FALSE	1
487	373.219	14.5	GAS1-N253LS		1	NLSIPVFFSEYGCNEVTPR	NLSIPVFFSEYGC[PPa]NEVTPR[487]	2	y	1	3	14.5	GAS1-N253LS	0	FALSE	0	0.99	FALSE	1
512	373.219	14.5	GAS1-N253LS		1	NLSIPVFFSEYGCNEVTPR	NLSIPVFFSEYGC[PPa]NEVTPR[512]	2	y	1	3	14.5	GAS1-N253LS	0	FALSE	0	0.99	FALSE	1
537	373.219	14.5	GAS1-N253LS		1	NLSIPVFFSEYGCNEVTPR	NLSIPVFFSEYGC[PPa]NEVTPR[537]	2	y	1	3	14.5	GAS1-N253LS	0	FALSE	0	0.99	FALSE	1
562	373.219	14.5	GAS1-N253LS		1	NLSIPVFFSEYGCNEVTPR	NLSIPVFFSEYGC[PPa]NEVTPR[562]	2	y	1	3	14.5	GAS1-N253LS	0	FALSE	0	0.99	FALSE	1
587	373.219	14.5	GAS1-N253LS		1	NLSIPVFFSEYGCNEVTPR	NLSIPVFFSEYGC[PPa]NEVTPR[587]	2	y	1	3	14.5	GAS1-N253LS	0	FALSE	0	0.99	FALSE	1
612	373.219	14.5	GAS1-N253LS		1	NLSIPVFFSEYGCNEVTPR	NLSIPVFFSEYGC[PPa]NEVTPR[612]	2	y	1	3	14.5	GAS1-N253LS	0	FALSE	0	0.99	FALSE	1
637	373.219	14.5	GAS1-N253LS		1	NLSIPVFFSEYGCNEVTPR	NLSIPVFFSEYGC[PPa]NEVTPR[637]	2	y	1	3	14.5	GAS1-N253LS	0	FALSE	0	0.99	FALSE	1
662	373.219	14.5	GAS1-N253LS		1	NLSIPVFFSEYGCNEVTPR	NLSIPVFFSEYGC[PPa]NEVTPR[662]	2	y	1	3	14.5	GAS1-N253LS	0	FALSE	0	0.99	FALSE	1
687	373.219	14.5	GAS1-N253LS		1	NLSIPVFFSEYGCNEVTPR	NLSIPVFFSEYGC[PPa]NEVTPR[687]	2	y	1	3	14.5	GAS1-N253LS	0	FALSE	0	0.99	FALSE	1
712	373.219	14.5	GAS1-N253LS		1	NLSIPVFFSEYGCNEVTPR	NLSIPVFFSEYGC[PPa]NEVTPR[712]	2	y	1	3	14.5	GAS1-N253LS	0	FALSE	0	0.99	FALSE	1
737	373.219	15.23	GAS1-N253LS		1	NLSIPVFFSEYGCNEVTPR	NLSIPVFFSEYGC[PPa]NEVTPR[737]	2	y	1	3	15.23	GAS1-N253LS	0	FALSE	0	0.99	FALSE	1
762	373.219	14.5	GAS1-N253LS		1	NLSIPVFFSEYGCNEVTPR	NLSIPVFFSEYGC[PPa]NEVTPR[762]	2	y	1	3	14.5	GAS1-N253LS	0	FALSE	0	0.99	FALSE	1
787	373.219	14.5	GAS1-N253LS		1	NLSIPVFFSEYGCNEVTPR	NLSIPVFFSEYGC[PPa]NEVTPR[787]	2	y	1	3	14.5	GAS1-N253LS	0	FALSE	0	0.99	FALSE	1
812	373.219	14.5	GAS1-N253LS		1	NLSIPVFFSEYGCNEVTPR	NLSIPVFFSEYGC[PPa]NEVTPR[812]	2	y	1	3	14.5	GAS1-N253LS	0	FALSE	0	0.99	FALSE	1
837	373.219	14.5	GAS1-N253LS		1	NLSIPVFFSEYGCNEVTPR	NLSIPVFFSEYGC[PPa]NEVTPR[837]	2	y	1	3	14.5	GAS1-N253LS	0	FALSE	0	0.99	FALSE	1
862	373.219	14.5	GAS1-N253LS		1	NLSIPVFFSEYGCNEVTPR	NLSIPVFFSEYGC[PPa]NEVTPR[862]	2	y	1	3	14.5	GAS1-N253LS	0	FALSE	0	0.99	FALSE	1
887	373.219	14.5	GAS1-N253LS		1	NLSIPVFFSEYGCNEVTPR	NLSIPVFFSEYGC[PPa]NEVTPR[887]	2	y	1	3	14.5	GAS1-N253LS	0	FALSE	0	0.99	FALSE	1
912	373.219	14.5	GAS1-N253LS		1	NLSIPVFFSEYGCNEVTPR	NLSIPVFFSEYGC[PPa]NEVTPR[912]	2	y	1	3	14.5	GAS1-N253LS	0	FALSE	0	0.99	FALSE	1
937	373.219	14.5	GAS1-N253LS		1	NLSIPVFFSEYGCNEVTPR	NLSIPVFFSEYGC[PPa]NEVTPR[937]	2	y	1	3	14.5	GAS1-N253LS	0	FALSE	0	0.99	FALSE	1
962	373.219	14.5	GAS1-N253LS		1	NLSIPVFFSEYGCNEVTPR	NLSIPVFFSEYGC[PPa]NEVTPR[962]	2	y	1	3	14.5	GAS1-N253LS	0	FALSE	0	0.99	FALSE	1
987	373.219	14.5	GAS1-N253LS		1	NLSIPVFFSEYGCNEVTPR	NLSIPVFFSEYGC[PPa]NEVTPR[987]	2	y	1	3	14.5	GAS1-N253LS	0	FALSE	0	0.99	FALSE	1
1012	373.219	14.5	GAS1-N253LS		1	NLSIPVFFSEYGCNEVTPR	NLSIPVFFSEYGC[PPa]NEVTPR[1012]	2	y	1	3	14.5	GAS1-N253LS	0	FALSE	0	0.99	FALSE	1
1037	373.219	14.5	GAS1-N253LS		1	NLSIPVFFSEYGCNEVTPR	NLSIPVFFSEYGC[PPa]NEVTPR[1037]	2	y	1	3	14.5	GAS1-N253LS	0	FALSE	0	0.99	FALSE	1
1062	373.219	14.5	GAS1-N253LS		1	NLSIPVFFSEYGCNEVTPR	NLSIPVFFSEYGC[PPa]NEVTPR[1062]	2	y	1	3	14.5	GAS1-N253LS	0	FALSE	0	0.99	FALSE	1
1087	373.219	14.5	GAS1-N253LS		1	NLSIPVFFSEYGCNEVTPR	NLSIPVFFSEYGC[PPa]NEVTPR[1087]	2	y	1	3	14.5	GAS1-N253LS	0	FALSE	0	0.99	FALSE	1
1112	373.219	14.5	GAS1-N253LS		1	NLSIPVFFSEYGCNEVTPR	NLSIPVFFSEYGC[PPa]NEVTPR[1112]	2	y	1	3	14.5	GAS1-N253LS	0	FALSE	0	0.99	FALSE	1
1137	373.219	14.5	GAS1-N253LS		1	NLSIPVFFSEYGCNEVTPR	NLSIPVFFSEYGC[PPa]NEVTPR[1137]	2	y	1	3	14.5	GAS1-N253LS	0	FALSE	0	0.99	FALSE	1
1162	373.219	14.5	GAS1-N253LS		1	NLSIPVFFSEYGCNEVTPR	NLSIPVFFSEYGC[PPa]NEVTPR[1162]	2	y	1	3	14.5	GAS1-N253LS	0	FALSE	0	0.99	FALSE	1
1187	373.219	14.5	GAS1-N253LS		1	NLSIPVFFSEYGCNEVTPR	NLSIPVFFSEYGC[PPa]NEVTPR[1187]	2	y	1	3	14.5	GAS1-N253LS	0	FALSE	0	0.99	FALSE	1
1212	373.219	14.5	GAS1-N253LS		1	NLSIPVFFSEYGCNEVTPR	NLSIPVFFSEYGC[PPa]NEVTPR[1212]	2	y	1	3	14.5	GAS1-N253LS	0	FALSE	0	0.99	FALSE	1
1237	373.219	14.5	GAS1-N253LS		1	NLSIPVFFSEYGCNEVTPR	NLSIPVFFSEYGC[PPa]NEVTPR[1237]	2	y	1	3	14.5	GAS1-N253LS	0	FALSE	0	0.99	FALSE	1
412.5	187.113	14.5	GAS1-N253LS		1	NLSIPVFFSEYGCNEVTPR	NLSIPVFFSEYGC[PPa]NEVTPR[412]	2	y	2	3	14.5	GAS1-N253LS	0	FALSE	0	0.99	FALSE	1
437	187.113	14.5	GAS1-N253LS		1	NLSIPVFFSEYGCNEVTPR	NLSIPVFFSEYGC[PPa]NEVTPR[437]	2	y	2	3	14.5	GAS1-N253LS	0	FALSE	0	0.99	FALSE	1
462	187.113	14.5	GAS1-N253LS		1	NLSIPVFFSEYGCNEVTPR	NLSIPVFFSEYGC[PPa]NEVTPR[462]	2	y	2	3	14.5	GAS1-N253LS	0	FALSE	0	0.99	FALSE	1
487	187.113	14.5	GAS1-N253LS		1	NLSIPVFFSEYGCNEVTPR	NLSIPVFFSEYGC[PPa]NEVTPR[487]	2	y	2	3	14.5	GAS1-N253LS	0	FALSE	0	0.99	FALSE	1
512	187.113	14.5	GAS1-N253LS		1	NLSIPVFFSEYGCNEVTPR	NLSIPVFFSEYGC[PPa]NEVTPR[512]	2	y	2	3	14.5	GAS1-N253LS	0	FALSE	0	0.99	FALSE	1
537	187.113	14.5	GAS1-N253LS		1	NLSIPVFFSEYGCNEVTPR	NLSIPVFFSEYGC[PPa]NEVTPR[537]	2	y	2	3	14.5	GAS1-N253LS	0	FALSE	0	0.99	FALSE	1
562	187.113	14.5	GAS1-N253LS		1	NLSIPVFFSEYGCNEVTPR	NLSIPVFFSEYGC[PPa]NEVTPR[562]	2	y	2	3	14.5	GAS1-N253LS	0	FALSE	0	0.99	FALSE	1
587	187.113	14.5	GAS1-N253LS		1	NLSIPVFFSEYGCNEVTPR	NLSIPVFFSEYGC[PPa]NEVTPR[587]	2	y	2	3	14.5	GAS1-N253LS	0	FALSE	0	0.99	FALSE	1
612	187.113	14.5	GAS1-N253LS		1	NLSIPVFFSEYGCNEVTPR	NLSIPVFFSEYGC[PPa]NEVTPR[612]	2	y	2	3	14.5	GAS1-N253LS	0	FALSE	0	0.99	FALSE	1
637	187.113	14.5	GAS1-N253LS		1	NLSIPVFFSEYGCNEVTPR	NLSIPVFFSEYGC[PPa]NEVTPR[637]	2	y	2	3	14.5	GAS1-N253LS	0	FALSE	0	0.99	FALSE	1
662	187.113	14.5	GAS1-N253LS		1	NLSIPVFFSEYGCNEVTPR	NLSIPVFFSEYGC[PPa]NEVTPR[662]	2	y	2	3	14.5	GAS1-N253LS	0	FALSE	0	0.99	FALSE	1
687	187.113	14.5	GAS1-N253LS		1	NLSIPVFFSEYGCNEVTPR	NLSIPVFFSEYGC[PPa]NEVTPR[687]	2	y	2	3	14.5	GAS1-N253LS	0	FALSE	0	0.99	FALSE	1
712	187.113	14.5	GAS1-N253LS		1	NLSIPVFFSEYGCNEVTPR	NLSIPVFFSEYGC[PPa]NEVTPR[712]	2	y	2	3	14.5	GAS1-N253LS	0	FALSE	0	0.99	FALSE	1
737	187.113	15.23	GAS1-N253LS		1	NLSIPVFFSEYGCNEVTPR	NLSIPVFFSEYGC[PPa]NEVTPR[737]	2	y	2	3	15.23	GAS1-N253LS	0	FALSE	0	0.99	FALSE	1
762	187.113	14.5	GAS1-N253LS		1	NLSIPVFFSEYGCNEVTPR	NLSIPVFFSEYGC[PPa]NEVTPR[762]	2	y	2	3	14.5	GAS1-N253LS	0	FALSE	0	0.99	FALSE	1
787	187.113	14.5	GAS1-N253LS		1	NLSIPVFFSEYGCNEVTPR	NLSIPVFFSEYGC[PPa]NEVTPR[787]	2	y	2	3	14.5	GAS1-N253LS	0	FALSE	0	0.99	FALSE	1
812	187.113	14.5	GAS1-N253LS		1	NLSIPVFFSEYGCNEVTPR	NLSIPVFFSEYGC[PPa]NEVTPR[812]	2	y	2	3	14.5	GAS1-N253LS	0	FALSE	0	0.99	FALSE	1
837	187.113	14.5	GAS1-N253LS		1	NLSIPVFFSEYGCNEVTPR	NLSIPVFFSEYGC[PPa]NEVTPR[837]	2	y	2	3	14.5	GAS1-N253LS	0	FALSE	0	0.99	FALSE	1
862	187.113	14.5	GAS1-N253LS		1	NLSIPVFFSEYGCNEVTPR	NLSIPVFFSEYGC[PPa]NEVTPR[862]	2	y	2	3	14.5	GAS1-N253LS	0	FALSE	0	0.99	FALSE	1
887	187.113	14.5	GAS1-N253LS		1	NLSIPVFFSEYGCNEVTPR	NLSIPVFFSEYGC[PPa]NEVTPR[887]	2	y	2	3	14.5	GAS1-N253LS	0	FALSE	0	0.99	FALSE	1
912	187.113	14.5	GAS1-N253LS		1	NLSIPVFFSEYGCNEVTPR	NLSIPVFFSEYGC[PPa]NEVTPR[912]	2	y	2	3	14.5	GAS1-N253LS	0	FALSE	0	0.99	FALSE	1
937	187.113	14.5	GAS1-N253LS		1	NLSIPVFFSEYGCNEVTPR	NLSIPVFFSEYGC[PPa]NEVTPR[937]	2	y	2	3	14.5	GAS1-N253LS	0	FALSE	0	0.99	FALSE	1
962	187.113	14.5	GAS1-N253LS		1	NLSIPVFFSEYGCNEVTPR	NLSIPVFFSEYGC[PPa]NEVTPR[962]	2	y	2	3	14.5	GAS1-N253LS	0	FALSE	0	0.99	FALSE	1
987	187.113	14.5	GAS1-N253LS		1	NLSIPVFFSEYGCNEVTPR	NLSIPVFFSEYGC[PPa]NEVTPR[987]	2	y	2	3	14.5	GAS1-N253LS	0	FALSE	0	0.99	FALSE	1
1012	187.113	14.5	GAS1-N253LS		1	NLSIPVFFSEYGCNEVTPR	NLSIPVFFSEYGC[PPa]NEVTPR[1012]	2	y	2	3	14.5	GAS1-N253LS	0	FALSE	0	0.99	FALSE	1
1037	187.113	14.5	GAS1-N253LS		1	NLSIPVFFSEYGCNEVTPR	NLSIPVFFSEYGC[PPa]NEVTPR[1037]	2	y	2	3	14.5	GAS1-N253LS	0	FALSE	0	0.99	FALSE	1
1062	187.113	14.5	GAS1-N253LS		1	NLSIPVFFSEYGCNEVTPR	NLSIPVFFSEYGC[PPa]NEVTPR[1062]	2	y	2	3	14.5	GAS1-N253LS	0	FALSE	0	0.99	FALSE	1
1087	187.113	14.5	GAS1-N253LS		1	NLSIPVFFSEYGCNEVTPR	NLSIPVFFSEYGC[PPa]NEVTPR[1087]	2	y	2	3	14.5	GAS1-N253LS	0	FALSE	0	0.99	FALSE	1
1112	187.113	14.5	GAS1-N253LS		1	NLSIPVFFSEYGCNEVTPR	NLSIPVFFSEYGC[PPa]NEVTPR[1112]	2	y	2	3	14.5	GAS1-N253LS	0	FALSE	0	0.99	FALSE	1
1137	187.113	14.5	GAS1-N253LS		1	NLSIPVFFSEYGCNEVTPR	NLSIPVFFSEYGC[PPa]NEVTPR[1137]	2	y	2	3	14.5	GAS1-N253LS	0	FALSE	0	0.99	FALSE	1
1162	187.113	14.5	GAS1-N253LS		1	NLSIPVFFSEYGCNEVTPR	NLSIPVFFSEYGC[PPa]NEVTPR[1162]	2	y	2	3	14.5	GAS1-N253LS	0	FALSE	0	0.99	FALSE	1
1187	187.113	14.5	GAS1-N253LS		1	NLSIPVFFSEYGCNEVTPR	NLSIPVFFSEYGC[PPa]NEVTPR[1187]	2	y	2	3	14.5	GAS1-N253LS	0	FALSE	0	0.99	FALSE	1
1212	187.113	14.5	GAS1-N253LS		1	NLSIPVFFSEYGCNEVTPR	NLSIPVFFSEYGC[PPa]NEVTPR[1212]	2	y	2	3	14.5	GAS1-N253LS	0	FALSE	0	0.99	FALSE	1
1237	187.113	14.5	GAS1-N253LS		1	NLSIPVFFSEYGCNEVTPR	NLSIPVFFSEYGC[PPa]NEVTPR[1237]	2	y	2	3	14.5	GAS1-N253LS	0	FALSE	0	0.99	FALSE	1
412.5	472.288	14.5	GAS1-N253LS		1	NLSIPVFFSEYGCNEVTPR	NLSIPVFFSEYGC[PPa]NEVTPR[412]	2	y	1	4	14.5	GAS1-N253LS	0	FALSE	0	0.99	FALSE	1
437	472.288	14.5	GAS1-N253LS		1	NLSIPVFFSEYGCNEVTPR	NLSIPVFFSEYGC[PPa]NEVTPR[437]	2	y	1	4	14.5	GAS1-N253LS	0	FALSE	0	0.99	FALSE	1
462	472.288	14.5	GAS1-N253LS		1	NLSIPVFFSEYGCNEVTPR	NLSIPVFFSEYGC[PPa]NEVTPR[462]	2	y	1	4	14.5	GAS1-N253LS	0	FALSE	0	0.99	FALSE	1
487	472.288	14.5	GAS1-N253LS		1	NLSIPVFFSEYGCNEVTPR	NLSIPVFFSEYGC[PPa]NEVTPR[487]	2	y	1	4	14.5	GAS1-N253LS	0	FALSE	0	0.99	FALSE	1
512	472.288	14.5	GAS1-N253LS		1	NLSIPVFFSEYGCNEVTPR	NLSIPVFFSEYGC[PPa]NEVTPR[512]	2	y	1	4	14.5	GAS1-N253LS	0	FALSE	0	0.99	FALSE	1
537	472.288	14.5	GAS1-N253LS		1	NLSIPVFFSEYGCNEVTPR	NLSIPVFFSEYGC[PPa]NEVTPR[537]	2	y	1	4	14.5	GAS1-N253LS	0	FALSE	0	0.99	FALSE	1
562	472.288	14.5	GAS1-N253LS		1	NLSIPVFFSEYGCNEVTPR	NLSIPVFFSEYGC[PPa]NEVTPR[562]	2	y	1	4	14.5	GAS1-N253LS	0	FALSE	0	0.99	FALSE	1
587	472.288	14.5	GAS1-N253LS		1	NLSIPVFFSEYGCNEVTPR	NLSIPVFFSEYGC[PPa]NEVTPR[587]	2	y	1	4	14.5	GAS1-N253LS	0	FALSE	0	0.99	FALSE	1
612	472.288	14.5	GAS1-N253LS		1	NLSIPVFFSEYGCNEVTPR	NLSIPVFFSEYGC[PPa]NEVTPR[612]	2	y	1	4	14.5	GAS1-N253LS	0	FALSE	0	0.99	FALSE	1
637	472.288	14.5	GAS1-N253LS		1	NLSIPVFFSEYGCNEVTPR	NLSIPVFFSEYGC[PPa]NEVTPR[637]	2	y	1	4	14.5	GAS1-N253LS	0	FALSE	0	0.99	FALSE	1
662	472.288	14.5	GAS1-N253LS		1	NLSIPVFFSEYGCNEVTPR	NLSIPVFFSEYGC[PPa]NEVTPR[662]	2	y	1	4	14.5	GAS1-N253LS	0	FALSE	0	0.99	FALSE	1
687	472.288	14.5	GAS1-N253LS		1	NLSIPVFFSEYGCNEVTPR	NLSIPVFFSEYGC[PPa]NEVTPR[687]	2	y	1	4	14.5	GAS1-N253LS	0	FALSE	0	0.99	FALSE	1
712	472.288	14.5	GAS1-N253LS		1	NLSIPVFFSEYGCNEVTPR	NLSIPVFFSEYGC[PPa]NEVTPR[712]	2	y	1	4	14.5	GAS1-N253LS	0	FALSE	0	0.99	FALSE	1
737	472.288	15.23	GAS1-N253LS		1	NLSIPVFFSEYGCNEVTPR	NLSIPVFFSEYGC[PPa]NEVTPR[737]	2	y	1	4	15.23	GAS1-N253LS	0	FALSE	0	0.99	FALSE	1
762	472.288	14.5	GAS1-N253LS		1	NLSIPVFFSEYGCNEVTPR	NLSIPVFFSEYGC[PPa]NEVTPR[762]	2	y	1	4	14.5	GAS1-N253LS	0	FALSE	0	0.99	FALSE	1
787	472.288	14.5	GAS1-N253LS		1	NLSIPVFFSEYGCNEVTPR	NLSIPVFFSEYGC[PPa]NEVTPR[787]	2	y	1	4	14.5	GAS1-N253LS	0	FALSE	0	0.99	FALSE	1
812	472.288	14.5	GAS1-N253LS		1	NLSIPVFFSEYGCNEVTPR	NLSIPVFFSEYGC[PPa]NEVTPR[812]	2	y	1	4	14.5	GAS1-N253LS	0	FALSE	0	0.99	FALSE	1
837	472.288	14.5	GAS1-N253LS		1	NLSIPVFFSEYGCNEVTPR	NLSIPVFFSEYGC[PPa]NEVTPR[837]	2	y	1	4	14.5	GAS1-N253LS	0	FALSE	0	0.99	FALSE	1
862	472.288	14.5	GAS1-N253LS		1	NLSIPVFFSEYGCNEVTPR	NLSIPVFFSEYGC[PPa]NEVTPR[862]	2	y	1	4	14.5	GAS1-N253LS	0	FALSE	0	0.99	FALSE	1
887	472.288	14.5	GAS1-N253LS		1	NLSIPVFFSEYGCNEVTPR	NLSIPVFFSEYGC[PPa]NEVTPR[887]	2	y	1	4	14.5	GAS1-N253LS	0	FALSE	0	0.99	FALSE	1
912	472.288	14.5	GAS1-N253LS		1	NLSIPVFFSEYGCNEVTPR	NLSIPVFFSEYGC[PPa]NEVTPR[912]	2	y	1	4	14.5	GAS1-N253LS	0	FALSE	0	0.99	FALSE	1
937	472.288	14.5	GAS1-N253LS		1	NLSIPVFFSEYGCNEVTPR	NLSIPVFFSEYGC[PPa]NEVTPR[937]	2	y	1	4	14.5	GAS1-N253LS	0	FALSE	0	0.99	FALSE	1
962	472.288	14.5	GAS1-N253LS		1	NLSIPVFFSEYGCNEVTPR	NLSIPVFFSEYGC[PPa]NEVTPR[962]	2	y	1	4	14.5	GAS1-N253LS	0	FALSE	0	0.99	FALSE	1
987	472.288	14.5	GAS1-N253LS		1	NLSIPVFFSEYGCNEVTPR	NLSIPVFFSEYGC[PPa]NEVTPR[987]	2	y	1	4	14.5	GAS1-N253LS	0	FALSE	0	0.99	FALSE	1
1012	472.288	14.5	GAS1-N253LS		1	NLSIPVFFSEYGCNEVTPR	NLSIPVFFSEYGC[PPa]NEVTPR[1012]	2	y	1	4	14.5	GAS1-N253LS	0	FALSE	0	0.99	FALSE	1
1037	472.288	14.5	GAS1-N253LS		1	NLSIPVFFSEYGCNEVTPR	NLSIPVFFSEYGC[PPa]NEVTPR[1037]	2	y	1	4	14.5	GAS1-N253LS	0	FALSE	0	0.99	FALSE	1
1062	472.288	14.5	GAS1-N253LS		1	NLSIPVFFSEYGCNEVTPR	NLSIPVFFSEYGC[PPa]NEVTPR[1062]	2	y	1	4	14.5	GAS1-N253LS	0	FALSE	0	0.99	FALSE	1
[truncated: 5,651 more rows]
