# Supplementary material for: DIALib: an automated ion library generator for data independent acquisition mass spectrometry analysis of peptides and glycopeptides
Source: bioRxiv preprint, doi:10.1101/696518, version 2 (2020-01-21)
Supplement: Supplementary Table S8 [file 696518_file08.xlsx]

## Sheet: Supplementary Table S6
Q1	Q3	RT_detected	protein_name	isotype	relative_intensity	stripped_sequence	modification_sequence	prec_z	frg_type	frg_z	frg_nr	iRT	uniprot_id	score	decoy	prec_y	confidence	shared	N	rank	mods	nterm	cterm
412.5	1173.52	1	IgG3		1	EEQYNSTFR	EEQYN[1.412]STFR	2	Y	1	1	1	IgG3	0	FALSE	0	0.99	FALSE	1
437	1173.52	1	IgG3		1	EEQYNSTFR	EEQYN[1.437]STFR	2	Y	1	1	1	IgG3	0	FALSE	0	0.99	FALSE	1
462	1173.52	1	IgG3		1	EEQYNSTFR	EEQYN[1.462]STFR	2	Y	1	1	1	IgG3	0	FALSE	0	0.99	FALSE	1
487	1173.52	1	IgG3		1	EEQYNSTFR	EEQYN[1.487]STFR	2	Y	1	1	1	IgG3	0	FALSE	0	0.99	FALSE	1
512	1173.52	1	IgG3		1	EEQYNSTFR	EEQYN[1.512]STFR	2	Y	1	1	1	IgG3	0	FALSE	0	0.99	FALSE	1
537	1173.52	1	IgG3		1	EEQYNSTFR	EEQYN[1.537]STFR	2	Y	1	1	1	IgG3	0	FALSE	0	0.99	FALSE	1
562	1173.52	1	IgG3		1	EEQYNSTFR	EEQYN[1.562]STFR	2	Y	1	1	1	IgG3	0	FALSE	0	0.99	FALSE	1
587	1173.52	1	IgG3		1	EEQYNSTFR	EEQYN[1.587]STFR	2	Y	1	1	1	IgG3	0	FALSE	0	0.99	FALSE	1
612	1173.52	1	IgG3		1	EEQYNSTFR	EEQYN[1.612]STFR	2	Y	1	1	1	IgG3	0	FALSE	0	0.99	FALSE	1
637	1173.52	1	IgG3		1	EEQYNSTFR	EEQYN[1.637]STFR	2	Y	1	1	1	IgG3	0	FALSE	0	0.99	FALSE	1
662	1173.52	1	IgG3		1	EEQYNSTFR	EEQYN[1.662]STFR	2	Y	1	1	1	IgG3	0	FALSE	0	0.99	FALSE	1
687	1173.52	1	IgG3		1	EEQYNSTFR	EEQYN[1.687]STFR	2	Y	1	1	1	IgG3	0	FALSE	0	0.99	FALSE	1
712	1173.52	1	IgG3		1	EEQYNSTFR	EEQYN[1.712]STFR	2	Y	1	1	1	IgG3	0	FALSE	0	0.99	FALSE	1
737	1173.52	1	IgG3		1	EEQYNSTFR	EEQYN[1.737]STFR	2	Y	1	1	1	IgG3	0	FALSE	0	0.99	FALSE	1
762	1173.52	1	IgG3		1	EEQYNSTFR	EEQYN[1.762]STFR	2	Y	1	1	1	IgG3	0	FALSE	0	0.99	FALSE	1
787	1173.52	1	IgG3		1	EEQYNSTFR	EEQYN[1.787]STFR	2	Y	1	1	1	IgG3	0	FALSE	0	0.99	FALSE	1
812	1173.52	1	IgG3		1	EEQYNSTFR	EEQYN[1.812]STFR	2	Y	1	1	1	IgG3	0	FALSE	0	0.99	FALSE	1
837	1173.52	1	IgG3		1	EEQYNSTFR	EEQYN[1.837]STFR	2	Y	1	1	1	IgG3	0	FALSE	0	0.99	FALSE	1
862	1173.52	1	IgG3		1	EEQYNSTFR	EEQYN[1.862]STFR	2	Y	1	1	1	IgG3	0	FALSE	0	0.99	FALSE	1
887	1173.52	1	IgG3		1	EEQYNSTFR	EEQYN[1.887]STFR	2	Y	1	1	1	IgG3	0	FALSE	0	0.99	FALSE	1
912	1173.52	1	IgG3		1	EEQYNSTFR	EEQYN[1.912]STFR	2	Y	1	1	1	IgG3	0	FALSE	0	0.99	FALSE	1
937	1173.52	1	IgG3		1	EEQYNSTFR	EEQYN[1.937]STFR	2	Y	1	1	1	IgG3	0	FALSE	0	0.99	FALSE	1
962	1173.52	1	IgG3		1	EEQYNSTFR	EEQYN[1.962]STFR	2	Y	1	1	1	IgG3	0	FALSE	0	0.99	FALSE	1
987	1173.52	1	IgG3		1	EEQYNSTFR	EEQYN[1.987]STFR	2	Y	1	1	1	IgG3	0	FALSE	0	0.99	FALSE	1
1012	1173.52	1	IgG3		1	EEQYNSTFR	EEQYN[1.1012]STFR	2	Y	1	1	1	IgG3	0	FALSE	0	0.99	FALSE	1
1037	1173.52	1	IgG3		1	EEQYNSTFR	EEQYN[1.1037]STFR	2	Y	1	1	1	IgG3	0	FALSE	0	0.99	FALSE	1
1062	1173.52	1	IgG3		1	EEQYNSTFR	EEQYN[1.1062]STFR	2	Y	1	1	1	IgG3	0	FALSE	0	0.99	FALSE	1
1087	1173.52	1	IgG3		1	EEQYNSTFR	EEQYN[1.1087]STFR	2	Y	1	1	1	IgG3	0	FALSE	0	0.99	FALSE	1
1112	1173.52	1	IgG3		1	EEQYNSTFR	EEQYN[1.1112]STFR	2	Y	1	1	1	IgG3	0	FALSE	0	0.99	FALSE	1
1137	1173.52	1	IgG3		1	EEQYNSTFR	EEQYN[1.1137]STFR	2	Y	1	1	1	IgG3	0	FALSE	0	0.99	FALSE	1
1162	1173.52	1	IgG3		1	EEQYNSTFR	EEQYN[1.1162]STFR	2	Y	1	1	1	IgG3	0	FALSE	0	0.99	FALSE	1
1187	1173.52	1	IgG3		1	EEQYNSTFR	EEQYN[1.1187]STFR	2	Y	1	1	1	IgG3	0	FALSE	0	0.99	FALSE	1
1212	1173.52	1	IgG3		1	EEQYNSTFR	EEQYN[1.1212]STFR	2	Y	1	1	1	IgG3	0	FALSE	0	0.99	FALSE	1
1237	1173.52	1	IgG3		1	EEQYNSTFR	EEQYN[1.1237]STFR	2	Y	1	1	1	IgG3	0	FALSE	0	0.99	FALSE	1
412.5	587.262	1	IgG3		1	EEQYNSTFR	EEQYN[1.412]STFR	2	Y	2	1	1	IgG3	0	FALSE	0	0.99	FALSE	1
437	587.262	1	IgG3		1	EEQYNSTFR	EEQYN[1.437]STFR	2	Y	2	1	1	IgG3	0	FALSE	0	0.99	FALSE	1
462	587.262	1	IgG3		1	EEQYNSTFR	EEQYN[1.462]STFR	2	Y	2	1	1	IgG3	0	FALSE	0	0.99	FALSE	1
487	587.262	1	IgG3		1	EEQYNSTFR	EEQYN[1.487]STFR	2	Y	2	1	1	IgG3	0	FALSE	0	0.99	FALSE	1
512	587.262	1	IgG3		1	EEQYNSTFR	EEQYN[1.512]STFR	2	Y	2	1	1	IgG3	0	FALSE	0	0.99	FALSE	1
537	587.262	1	IgG3		1	EEQYNSTFR	EEQYN[1.537]STFR	2	Y	2	1	1	IgG3	0	FALSE	0	0.99	FALSE	1
562	587.262	1	IgG3		1	EEQYNSTFR	EEQYN[1.562]STFR	2	Y	2	1	1	IgG3	0	FALSE	0	0.99	FALSE	1
587	587.262	1	IgG3		1	EEQYNSTFR	EEQYN[1.587]STFR	2	Y	2	1	1	IgG3	0	FALSE	0	0.99	FALSE	1
612	587.262	1	IgG3		1	EEQYNSTFR	EEQYN[1.612]STFR	2	Y	2	1	1	IgG3	0	FALSE	0	0.99	FALSE	1
637	587.262	1	IgG3		1	EEQYNSTFR	EEQYN[1.637]STFR	2	Y	2	1	1	IgG3	0	FALSE	0	0.99	FALSE	1
662	587.262	1	IgG3		1	EEQYNSTFR	EEQYN[1.662]STFR	2	Y	2	1	1	IgG3	0	FALSE	0	0.99	FALSE	1
687	587.262	1	IgG3		1	EEQYNSTFR	EEQYN[1.687]STFR	2	Y	2	1	1	IgG3	0	FALSE	0	0.99	FALSE	1
712	587.262	1	IgG3		1	EEQYNSTFR	EEQYN[1.712]STFR	2	Y	2	1	1	IgG3	0	FALSE	0	0.99	FALSE	1
737	587.262	1	IgG3		1	EEQYNSTFR	EEQYN[1.737]STFR	2	Y	2	1	1	IgG3	0	FALSE	0	0.99	FALSE	1
762	587.262	1	IgG3		1	EEQYNSTFR	EEQYN[1.762]STFR	2	Y	2	1	1	IgG3	0	FALSE	0	0.99	FALSE	1
787	587.262	1	IgG3		1	EEQYNSTFR	EEQYN[1.787]STFR	2	Y	2	1	1	IgG3	0	FALSE	0	0.99	FALSE	1
812	587.262	1	IgG3		1	EEQYNSTFR	EEQYN[1.812]STFR	2	Y	2	1	1	IgG3	0	FALSE	0	0.99	FALSE	1
837	587.262	1	IgG3		1	EEQYNSTFR	EEQYN[1.837]STFR	2	Y	2	1	1	IgG3	0	FALSE	0	0.99	FALSE	1
862	587.262	1	IgG3		1	EEQYNSTFR	EEQYN[1.862]STFR	2	Y	2	1	1	IgG3	0	FALSE	0	0.99	FALSE	1
887	587.262	1	IgG3		1	EEQYNSTFR	EEQYN[1.887]STFR	2	Y	2	1	1	IgG3	0	FALSE	0	0.99	FALSE	1
912	587.262	1	IgG3		1	EEQYNSTFR	EEQYN[1.912]STFR	2	Y	2	1	1	IgG3	0	FALSE	0	0.99	FALSE	1
937	587.262	1	IgG3		1	EEQYNSTFR	EEQYN[1.937]STFR	2	Y	2	1	1	IgG3	0	FALSE	0	0.99	FALSE	1
962	587.262	1	IgG3		1	EEQYNSTFR	EEQYN[1.962]STFR	2	Y	2	1	1	IgG3	0	FALSE	0	0.99	FALSE	1
987	587.262	1	IgG3		1	EEQYNSTFR	EEQYN[1.987]STFR	2	Y	2	1	1	IgG3	0	FALSE	0	0.99	FALSE	1
1012	587.262	1	IgG3		1	EEQYNSTFR	EEQYN[1.1012]STFR	2	Y	2	1	1	IgG3	0	FALSE	0	0.99	FALSE	1
1037	587.262	1	IgG3		1	EEQYNSTFR	EEQYN[1.1037]STFR	2	Y	2	1	1	IgG3	0	FALSE	0	0.99	FALSE	1
1062	587.262	1	IgG3		1	EEQYNSTFR	EEQYN[1.1062]STFR	2	Y	2	1	1	IgG3	0	FALSE	0	0.99	FALSE	1
1087	587.262	1	IgG3		1	EEQYNSTFR	EEQYN[1.1087]STFR	2	Y	2	1	1	IgG3	0	FALSE	0	0.99	FALSE	1
1112	587.262	1	IgG3		1	EEQYNSTFR	EEQYN[1.1112]STFR	2	Y	2	1	1	IgG3	0	FALSE	0	0.99	FALSE	1
1137	587.262	1	IgG3		1	EEQYNSTFR	EEQYN[1.1137]STFR	2	Y	2	1	1	IgG3	0	FALSE	0	0.99	FALSE	1
1162	587.262	1	IgG3		1	EEQYNSTFR	EEQYN[1.1162]STFR	2	Y	2	1	1	IgG3	0	FALSE	0	0.99	FALSE	1
1187	587.262	1	IgG3		1	EEQYNSTFR	EEQYN[1.1187]STFR	2	Y	2	1	1	IgG3	0	FALSE	0	0.99	FALSE	1
1212	587.262	1	IgG3		1	EEQYNSTFR	EEQYN[1.1212]STFR	2	Y	2	1	1	IgG3	0	FALSE	0	0.99	FALSE	1
1237	587.262	1	IgG3		1	EEQYNSTFR	EEQYN[1.1237]STFR	2	Y	2	1	1	IgG3	0	FALSE	0	0.99	FALSE	1
412.5	1173.52	2	IgG3		1	EEQYNSTFR	EEQYN[2.412]STFR	2	Y	1	1	2	IgG3	0	FALSE	0	0.99	FALSE	1
437	1173.52	2	IgG3		1	EEQYNSTFR	EEQYN[2.437]STFR	2	Y	1	1	2	IgG3	0	FALSE	0	0.99	FALSE	1
462	1173.52	2	IgG3		1	EEQYNSTFR	EEQYN[2.462]STFR	2	Y	1	1	2	IgG3	0	FALSE	0	0.99	FALSE	1
487	1173.52	2	IgG3		1	EEQYNSTFR	EEQYN[2.487]STFR	2	Y	1	1	2	IgG3	0	FALSE	0	0.99	FALSE	1
512	1173.52	2	IgG3		1	EEQYNSTFR	EEQYN[2.512]STFR	2	Y	1	1	2	IgG3	0	FALSE	0	0.99	FALSE	1
537	1173.52	2	IgG3		1	EEQYNSTFR	EEQYN[2.537]STFR	2	Y	1	1	2	IgG3	0	FALSE	0	0.99	FALSE	1
562	1173.52	2	IgG3		1	EEQYNSTFR	EEQYN[2.562]STFR	2	Y	1	1	2	IgG3	0	FALSE	0	0.99	FALSE	1
587	1173.52	2	IgG3		1	EEQYNSTFR	EEQYN[2.587]STFR	2	Y	1	1	2	IgG3	0	FALSE	0	0.99	FALSE	1
612	1173.52	2	IgG3		1	EEQYNSTFR	EEQYN[2.612]STFR	2	Y	1	1	2	IgG3	0	FALSE	0	0.99	FALSE	1
637	1173.52	2	IgG3		1	EEQYNSTFR	EEQYN[2.637]STFR	2	Y	1	1	2	IgG3	0	FALSE	0	0.99	FALSE	1
662	1173.52	2	IgG3		1	EEQYNSTFR	EEQYN[2.662]STFR	2	Y	1	1	2	IgG3	0	FALSE	0	0.99	FALSE	1
687	1173.52	2	IgG3		1	EEQYNSTFR	EEQYN[2.687]STFR	2	Y	1	1	2	IgG3	0	FALSE	0	0.99	FALSE	1
712	1173.52	2	IgG3		1	EEQYNSTFR	EEQYN[2.712]STFR	2	Y	1	1	2	IgG3	0	FALSE	0	0.99	FALSE	1
737	1173.52	2	IgG3		1	EEQYNSTFR	EEQYN[2.737]STFR	2	Y	1	1	2	IgG3	0	FALSE	0	0.99	FALSE	1
762	1173.52	2	IgG3		1	EEQYNSTFR	EEQYN[2.762]STFR	2	Y	1	1	2	IgG3	0	FALSE	0	0.99	FALSE	1
787	1173.52	2	IgG3		1	EEQYNSTFR	EEQYN[2.787]STFR	2	Y	1	1	2	IgG3	0	FALSE	0	0.99	FALSE	1
812	1173.52	2	IgG3		1	EEQYNSTFR	EEQYN[2.812]STFR	2	Y	1	1	2	IgG3	0	FALSE	0	0.99	FALSE	1
837	1173.52	2	IgG3		1	EEQYNSTFR	EEQYN[2.837]STFR	2	Y	1	1	2	IgG3	0	FALSE	0	0.99	FALSE	1
862	1173.52	2	IgG3		1	EEQYNSTFR	EEQYN[2.862]STFR	2	Y	1	1	2	IgG3	0	FALSE	0	0.99	FALSE	1
887	1173.52	2	IgG3		1	EEQYNSTFR	EEQYN[2.887]STFR	2	Y	1	1	2	IgG3	0	FALSE	0	0.99	FALSE	1
912	1173.52	2	IgG3		1	EEQYNSTFR	EEQYN[2.912]STFR	2	Y	1	1	2	IgG3	0	FALSE	0	0.99	FALSE	1
937	1173.52	2	IgG3		1	EEQYNSTFR	EEQYN[2.937]STFR	2	Y	1	1	2	IgG3	0	FALSE	0	0.99	FALSE	1
962	1173.52	2	IgG3		1	EEQYNSTFR	EEQYN[2.962]STFR	2	Y	1	1	2	IgG3	0	FALSE	0	0.99	FALSE	1
987	1173.52	2	IgG3		1	EEQYNSTFR	EEQYN[2.987]STFR	2	Y	1	1	2	IgG3	0	FALSE	0	0.99	FALSE	1
1012	1173.52	2	IgG3		1	EEQYNSTFR	EEQYN[2.1012]STFR	2	Y	1	1	2	IgG3	0	FALSE	0	0.99	FALSE	1
1037	1173.52	2	IgG3		1	EEQYNSTFR	EEQYN[2.1037]STFR	2	Y	1	1	2	IgG3	0	FALSE	0	0.99	FALSE	1
1062	1173.52	2	IgG3		1	EEQYNSTFR	EEQYN[2.1062]STFR	2	Y	1	1	2	IgG3	0	FALSE	0	0.99	FALSE	1
1087	1173.52	2	IgG3		1	EEQYNSTFR	EEQYN[2.1087]STFR	2	Y	1	1	2	IgG3	0	FALSE	0	0.99	FALSE	1
1112	1173.52	2	IgG3		1	EEQYNSTFR	EEQYN[2.1112]STFR	2	Y	1	1	2	IgG3	0	FALSE	0	0.99	FALSE	1
1137	1173.52	2	IgG3		1	EEQYNSTFR	EEQYN[2.1137]STFR	2	Y	1	1	2	IgG3	0	FALSE	0	0.99	FALSE	1
1162	1173.52	2	IgG3		1	EEQYNSTFR	EEQYN[2.1162]STFR	2	Y	1	1	2	IgG3	0	FALSE	0	0.99	FALSE	1
1187	1173.52	2	IgG3		1	EEQYNSTFR	EEQYN[2.1187]STFR	2	Y	1	1	2	IgG3	0	FALSE	0	0.99	FALSE	1
1212	1173.52	2	IgG3		1	EEQYNSTFR	EEQYN[2.1212]STFR	2	Y	1	1	2	IgG3	0	FALSE	0	0.99	FALSE	1
1237	1173.52	2	IgG3		1	EEQYNSTFR	EEQYN[2.1237]STFR	2	Y	1	1	2	IgG3	0	FALSE	0	0.99	FALSE	1
412.5	587.262	2	IgG3		1	EEQYNSTFR	EEQYN[2.412]STFR	2	Y	2	1	2	IgG3	0	FALSE	0	0.99	FALSE	1
437	587.262	2	IgG3		1	EEQYNSTFR	EEQYN[2.437]STFR	2	Y	2	1	2	IgG3	0	FALSE	0	0.99	FALSE	1
462	587.262	2	IgG3		1	EEQYNSTFR	EEQYN[2.462]STFR	2	Y	2	1	2	IgG3	0	FALSE	0	0.99	FALSE	1
487	587.262	2	IgG3		1	EEQYNSTFR	EEQYN[2.487]STFR	2	Y	2	1	2	IgG3	0	FALSE	0	0.99	FALSE	1
512	587.262	2	IgG3		1	EEQYNSTFR	EEQYN[2.512]STFR	2	Y	2	1	2	IgG3	0	FALSE	0	0.99	FALSE	1
537	587.262	2	IgG3		1	EEQYNSTFR	EEQYN[2.537]STFR	2	Y	2	1	2	IgG3	0	FALSE	0	0.99	FALSE	1
562	587.262	2	IgG3		1	EEQYNSTFR	EEQYN[2.562]STFR	2	Y	2	1	2	IgG3	0	FALSE	0	0.99	FALSE	1
587	587.262	2	IgG3		1	EEQYNSTFR	EEQYN[2.587]STFR	2	Y	2	1	2	IgG3	0	FALSE	0	0.99	FALSE	1
612	587.262	2	IgG3		1	EEQYNSTFR	EEQYN[2.612]STFR	2	Y	2	1	2	IgG3	0	FALSE	0	0.99	FALSE	1
637	587.262	2	IgG3		1	EEQYNSTFR	EEQYN[2.637]STFR	2	Y	2	1	2	IgG3	0	FALSE	0	0.99	FALSE	1
662	587.262	2	IgG3		1	EEQYNSTFR	EEQYN[2.662]STFR	2	Y	2	1	2	IgG3	0	FALSE	0	0.99	FALSE	1
687	587.262	2	IgG3		1	EEQYNSTFR	EEQYN[2.687]STFR	2	Y	2	1	2	IgG3	0	FALSE	0	0.99	FALSE	1
712	587.262	2	IgG3		1	EEQYNSTFR	EEQYN[2.712]STFR	2	Y	2	1	2	IgG3	0	FALSE	0	0.99	FALSE	1
737	587.262	2	IgG3		1	EEQYNSTFR	EEQYN[2.737]STFR	2	Y	2	1	2	IgG3	0	FALSE	0	0.99	FALSE	1
762	587.262	2	IgG3		1	EEQYNSTFR	EEQYN[2.762]STFR	2	Y	2	1	2	IgG3	0	FALSE	0	0.99	FALSE	1
787	587.262	2	IgG3		1	EEQYNSTFR	EEQYN[2.787]STFR	2	Y	2	1	2	IgG3	0	FALSE	0	0.99	FALSE	1
812	587.262	2	IgG3		1	EEQYNSTFR	EEQYN[2.812]STFR	2	Y	2	1	2	IgG3	0	FALSE	0	0.99	FALSE	1
837	587.262	2	IgG3		1	EEQYNSTFR	EEQYN[2.837]STFR	2	Y	2	1	2	IgG3	0	FALSE	0	0.99	FALSE	1
862	587.262	2	IgG3		1	EEQYNSTFR	EEQYN[2.862]STFR	2	Y	2	1	2	IgG3	0	FALSE	0	0.99	FALSE	1
887	587.262	2	IgG3		1	EEQYNSTFR	EEQYN[2.887]STFR	2	Y	2	1	2	IgG3	0	FALSE	0	0.99	FALSE	1
912	587.262	2	IgG3		1	EEQYNSTFR	EEQYN[2.912]STFR	2	Y	2	1	2	IgG3	0	FALSE	0	0.99	FALSE	1
937	587.262	2	IgG3		1	EEQYNSTFR	EEQYN[2.937]STFR	2	Y	2	1	2	IgG3	0	FALSE	0	0.99	FALSE	1
962	587.262	2	IgG3		1	EEQYNSTFR	EEQYN[2.962]STFR	2	Y	2	1	2	IgG3	0	FALSE	0	0.99	FALSE	1
987	587.262	2	IgG3		1	EEQYNSTFR	EEQYN[2.987]STFR	2	Y	2	1	2	IgG3	0	FALSE	0	0.99	FALSE	1
1012	587.262	2	IgG3		1	EEQYNSTFR	EEQYN[2.1012]STFR	2	Y	2	1	2	IgG3	0	FALSE	0	0.99	FALSE	1
1037	587.262	2	IgG3		1	EEQYNSTFR	EEQYN[2.1037]STFR	2	Y	2	1	2	IgG3	0	FALSE	0	0.99	FALSE	1
1062	587.262	2	IgG3		1	EEQYNSTFR	EEQYN[2.1062]STFR	2	Y	2	1	2	IgG3	0	FALSE	0	0.99	FALSE	1
1087	587.262	2	IgG3		1	EEQYNSTFR	EEQYN[2.1087]STFR	2	Y	2	1	2	IgG3	0	FALSE	0	0.99	FALSE	1
1112	587.262	2	IgG3		1	EEQYNSTFR	EEQYN[2.1112]STFR	2	Y	2	1	2	IgG3	0	FALSE	0	0.99	FALSE	1
1137	587.262	2	IgG3		1	EEQYNSTFR	EEQYN[2.1137]STFR	2	Y	2	1	2	IgG3	0	FALSE	0	0.99	FALSE	1
1162	587.262	2	IgG3		1	EEQYNSTFR	EEQYN[2.1162]STFR	2	Y	2	1	2	IgG3	0	FALSE	0	0.99	FALSE	1
1187	587.262	2	IgG3		1	EEQYNSTFR	EEQYN[2.1187]STFR	2	Y	2	1	2	IgG3	0	FALSE	0	0.99	FALSE	1
1212	587.262	2	IgG3		1	EEQYNSTFR	EEQYN[2.1212]STFR	2	Y	2	1	2	IgG3	0	FALSE	0	0.99	FALSE	1
1237	587.262	2	IgG3		1	EEQYNSTFR	EEQYN[2.1237]STFR	2	Y	2	1	2	IgG3	0	FALSE	0	0.99	FALSE	1
412.5	1173.52	3	IgG3		1	EEQYNSTFR	EEQYN[3.412]STFR	2	Y	1	1	3	IgG3	0	FALSE	0	0.99	FALSE	1
437	1173.52	3	IgG3		1	EEQYNSTFR	EEQYN[3.437]STFR	2	Y	1	1	3	IgG3	0	FALSE	0	0.99	FALSE	1
462	1173.52	3	IgG3		1	EEQYNSTFR	EEQYN[3.462]STFR	2	Y	1	1	3	IgG3	0	FALSE	0	0.99	FALSE	1
487	1173.52	3	IgG3		1	EEQYNSTFR	EEQYN[3.487]STFR	2	Y	1	1	3	IgG3	0	FALSE	0	0.99	FALSE	1
512	1173.52	3	IgG3		1	EEQYNSTFR	EEQYN[3.512]STFR	2	Y	1	1	3	IgG3	0	FALSE	0	0.99	FALSE	1
537	1173.52	3	IgG3		1	EEQYNSTFR	EEQYN[3.537]STFR	2	Y	1	1	3	IgG3	0	FALSE	0	0.99	FALSE	1
562	1173.52	3	IgG3		1	EEQYNSTFR	EEQYN[3.562]STFR	2	Y	1	1	3	IgG3	0	FALSE	0	0.99	FALSE	1
587	1173.52	3	IgG3		1	EEQYNSTFR	EEQYN[3.587]STFR	2	Y	1	1	3	IgG3	0	FALSE	0	0.99	FALSE	1
612	1173.52	3	IgG3		1	EEQYNSTFR	EEQYN[3.612]STFR	2	Y	1	1	3	IgG3	0	FALSE	0	0.99	FALSE	1
637	1173.52	3	IgG3		1	EEQYNSTFR	EEQYN[3.637]STFR	2	Y	1	1	3	IgG3	0	FALSE	0	0.99	FALSE	1
662	1173.52	3	IgG3		1	EEQYNSTFR	EEQYN[3.662]STFR	2	Y	1	1	3	IgG3	0	FALSE	0	0.99	FALSE	1
687	1173.52	3	IgG3		1	EEQYNSTFR	EEQYN[3.687]STFR	2	Y	1	1	3	IgG3	0	FALSE	0	0.99	FALSE	1
712	1173.52	3	IgG3		1	EEQYNSTFR	EEQYN[3.712]STFR	2	Y	1	1	3	IgG3	0	FALSE	0	0.99	FALSE	1
737	1173.52	3	IgG3		1	EEQYNSTFR	EEQYN[3.737]STFR	2	Y	1	1	3	IgG3	0	FALSE	0	0.99	FALSE	1
762	1173.52	3	IgG3		1	EEQYNSTFR	EEQYN[3.762]STFR	2	Y	1	1	3	IgG3	0	FALSE	0	0.99	FALSE	1
787	1173.52	3	IgG3		1	EEQYNSTFR	EEQYN[3.787]STFR	2	Y	1	1	3	IgG3	0	FALSE	0	0.99	FALSE	1
812	1173.52	3	IgG3		1	EEQYNSTFR	EEQYN[3.812]STFR	2	Y	1	1	3	IgG3	0	FALSE	0	0.99	FALSE	1
837	1173.52	3	IgG3		1	EEQYNSTFR	EEQYN[3.837]STFR	2	Y	1	1	3	IgG3	0	FALSE	0	0.99	FALSE	1
862	1173.52	3	IgG3		1	EEQYNSTFR	EEQYN[3.862]STFR	2	Y	1	1	3	IgG3	0	FALSE	0	0.99	FALSE	1
887	1173.52	3	IgG3		1	EEQYNSTFR	EEQYN[3.887]STFR	2	Y	1	1	3	IgG3	0	FALSE	0	0.99	FALSE	1
912	1173.52	3	IgG3		1	EEQYNSTFR	EEQYN[3.912]STFR	2	Y	1	1	3	IgG3	0	FALSE	0	0.99	FALSE	1
937	1173.52	3	IgG3		1	EEQYNSTFR	EEQYN[3.937]STFR	2	Y	1	1	3	IgG3	0	FALSE	0	0.99	FALSE	1
962	1173.52	3	IgG3		1	EEQYNSTFR	EEQYN[3.962]STFR	2	Y	1	1	3	IgG3	0	FALSE	0	0.99	FALSE	1
987	1173.52	3	IgG3		1	EEQYNSTFR	EEQYN[3.987]STFR	2	Y	1	1	3	IgG3	0	FALSE	0	0.99	FALSE	1
1012	1173.52	3	IgG3		1	EEQYNSTFR	EEQYN[3.1012]STFR	2	Y	1	1	3	IgG3	0	FALSE	0	0.99	FALSE	1
1037	1173.52	3	IgG3		1	EEQYNSTFR	EEQYN[3.1037]STFR	2	Y	1	1	3	IgG3	0	FALSE	0	0.99	FALSE	1
1062	1173.52	3	IgG3		1	EEQYNSTFR	EEQYN[3.1062]STFR	2	Y	1	1	3	IgG3	0	FALSE	0	0.99	FALSE	1
1087	1173.52	3	IgG3		1	EEQYNSTFR	EEQYN[3.1087]STFR	2	Y	1	1	3	IgG3	0	FALSE	0	0.99	FALSE	1
1112	1173.52	3	IgG3		1	EEQYNSTFR	EEQYN[3.1112]STFR	2	Y	1	1	3	IgG3	0	FALSE	0	0.99	FALSE	1
1137	1173.52	3	IgG3		1	EEQYNSTFR	EEQYN[3.1137]STFR	2	Y	1	1	3	IgG3	0	FALSE	0	0.99	FALSE	1
1162	1173.52	3	IgG3		1	EEQYNSTFR	EEQYN[3.1162]STFR	2	Y	1	1	3	IgG3	0	FALSE	0	0.99	FALSE	1
1187	1173.52	3	IgG3		1	EEQYNSTFR	EEQYN[3.1187]STFR	2	Y	1	1	3	IgG3	0	FALSE	0	0.99	FALSE	1
1212	1173.52	3	IgG3		1	EEQYNSTFR	EEQYN[3.1212]STFR	2	Y	1	1	3	IgG3	0	FALSE	0	0.99	FALSE	1
1237	1173.52	3	IgG3		1	EEQYNSTFR	EEQYN[3.1237]STFR	2	Y	1	1	3	IgG3	0	FALSE	0	0.99	FALSE	1
412.5	587.262	3	IgG3		1	EEQYNSTFR	EEQYN[3.412]STFR	2	Y	2	1	3	IgG3	0	FALSE	0	0.99	FALSE	1
437	587.262	3	IgG3		1	EEQYNSTFR	EEQYN[3.437]STFR	2	Y	2	1	3	IgG3	0	FALSE	0	0.99	FALSE	1
462	587.262	3	IgG3		1	EEQYNSTFR	EEQYN[3.462]STFR	2	Y	2	1	3	IgG3	0	FALSE	0	0.99	FALSE	1
487	587.262	3	IgG3		1	EEQYNSTFR	EEQYN[3.487]STFR	2	Y	2	1	3	IgG3	0	FALSE	0	0.99	FALSE	1
512	587.262	3	IgG3		1	EEQYNSTFR	EEQYN[3.512]STFR	2	Y	2	1	3	IgG3	0	FALSE	0	0.99	FALSE	1
537	587.262	3	IgG3		1	EEQYNSTFR	EEQYN[3.537]STFR	2	Y	2	1	3	IgG3	0	FALSE	0	0.99	FALSE	1
562	587.262	3	IgG3		1	EEQYNSTFR	EEQYN[3.562]STFR	2	Y	2	1	3	IgG3	0	FALSE	0	0.99	FALSE	1
587	587.262	3	IgG3		1	EEQYNSTFR	EEQYN[3.587]STFR	2	Y	2	1	3	IgG3	0	FALSE	0	0.99	FALSE	1
612	587.262	3	IgG3		1	EEQYNSTFR	EEQYN[3.612]STFR	2	Y	2	1	3	IgG3	0	FALSE	0	0.99	FALSE	1
637	587.262	3	IgG3		1	EEQYNSTFR	EEQYN[3.637]STFR	2	Y	2	1	3	IgG3	0	FALSE	0	0.99	FALSE	1
662	587.262	3	IgG3		1	EEQYNSTFR	EEQYN[3.662]STFR	2	Y	2	1	3	IgG3	0	FALSE	0	0.99	FALSE	1
687	587.262	3	IgG3		1	EEQYNSTFR	EEQYN[3.687]STFR	2	Y	2	1	3	IgG3	0	FALSE	0	0.99	FALSE	1
712	587.262	3	IgG3		1	EEQYNSTFR	EEQYN[3.712]STFR	2	Y	2	1	3	IgG3	0	FALSE	0	0.99	FALSE	1
737	587.262	3	IgG3		1	EEQYNSTFR	EEQYN[3.737]STFR	2	Y	2	1	3	IgG3	0	FALSE	0	0.99	FALSE	1
762	587.262	3	IgG3		1	EEQYNSTFR	EEQYN[3.762]STFR	2	Y	2	1	3	IgG3	0	FALSE	0	0.99	FALSE	1
787	587.262	3	IgG3		1	EEQYNSTFR	EEQYN[3.787]STFR	2	Y	2	1	3	IgG3	0	FALSE	0	0.99	FALSE	1
812	587.262	3	IgG3		1	EEQYNSTFR	EEQYN[3.812]STFR	2	Y	2	1	3	IgG3	0	FALSE	0	0.99	FALSE	1
837	587.262	3	IgG3		1	EEQYNSTFR	EEQYN[3.837]STFR	2	Y	2	1	3	IgG3	0	FALSE	0	0.99	FALSE	1
862	587.262	3	IgG3		1	EEQYNSTFR	EEQYN[3.862]STFR	2	Y	2	1	3	IgG3	0	FALSE	0	0.99	FALSE	1
887	587.262	3	IgG3		1	EEQYNSTFR	EEQYN[3.887]STFR	2	Y	2	1	3	IgG3	0	FALSE	0	0.99	FALSE	1
912	587.262	3	IgG3		1	EEQYNSTFR	EEQYN[3.912]STFR	2	Y	2	1	3	IgG3	0	FALSE	0	0.99	FALSE	1
937	587.262	3	IgG3		1	EEQYNSTFR	EEQYN[3.937]STFR	2	Y	2	1	3	IgG3	0	FALSE	0	0.99	FALSE	1
962	587.262	3	IgG3		1	EEQYNSTFR	EEQYN[3.962]STFR	2	Y	2	1	3	IgG3	0	FALSE	0	0.99	FALSE	1
987	587.262	3	IgG3		1	EEQYNSTFR	EEQYN[3.987]STFR	2	Y	2	1	3	IgG3	0	FALSE	0	0.99	FALSE	1
1012	587.262	3	IgG3		1	EEQYNSTFR	EEQYN[3.1012]STFR	2	Y	2	1	3	IgG3	0	FALSE	0	0.99	FALSE	1
1037	587.262	3	IgG3		1	EEQYNSTFR	EEQYN[3.1037]STFR	2	Y	2	1	3	IgG3	0	FALSE	0	0.99	FALSE	1
1062	587.262	3	IgG3		1	EEQYNSTFR	EEQYN[3.1062]STFR	2	Y	2	1	3	IgG3	0	FALSE	0	0.99	FALSE	1
1087	587.262	3	IgG3		1	EEQYNSTFR	EEQYN[3.1087]STFR	2	Y	2	1	3	IgG3	0	FALSE	0	0.99	FALSE	1
1112	587.262	3	IgG3		1	EEQYNSTFR	EEQYN[3.1112]STFR	2	Y	2	1	3	IgG3	0	FALSE	0	0.99	FALSE	1
1137	587.262	3	IgG3		1	EEQYNSTFR	EEQYN[3.1137]STFR	2	Y	2	1	3	IgG3	0	FALSE	0	0.99	FALSE	1
1162	587.262	3	IgG3		1	EEQYNSTFR	EEQYN[3.1162]STFR	2	Y	2	1	3	IgG3	0	FALSE	0	0.99	FALSE	1
1187	587.262	3	IgG3		1	EEQYNSTFR	EEQYN[3.1187]STFR	2	Y	2	1	3	IgG3	0	FALSE	0	0.99	FALSE	1
1212	587.262	3	IgG3		1	EEQYNSTFR	EEQYN[3.1212]STFR	2	Y	2	1	3	IgG3	0	FALSE	0	0.99	FALSE	1
1237	587.262	3	IgG3		1	EEQYNSTFR	EEQYN[3.1237]STFR	2	Y	2	1	3	IgG3	0	FALSE	0	0.99	FALSE	1
412.5	1173.52	4	IgG3		1	EEQYNSTFR	EEQYN[4.412]STFR	2	Y	1	1	4	IgG3	0	FALSE	0	0.99	FALSE	1
437	1173.52	4	IgG3		1	EEQYNSTFR	EEQYN[4.437]STFR	2	Y	1	1	4	IgG3	0	FALSE	0	0.99	FALSE	1
462	1173.52	4	IgG3		1	EEQYNSTFR	EEQYN[4.462]STFR	2	Y	1	1	4	IgG3	0	FALSE	0	0.99	FALSE	1
487	1173.52	4	IgG3		1	EEQYNSTFR	EEQYN[4.487]STFR	2	Y	1	1	4	IgG3	0	FALSE	0	0.99	FALSE	1
512	1173.52	4	IgG3		1	EEQYNSTFR	EEQYN[4.512]STFR	2	Y	1	1	4	IgG3	0	FALSE	0	0.99	FALSE	1
537	1173.52	4	IgG3		1	EEQYNSTFR	EEQYN[4.537]STFR	2	Y	1	1	4	IgG3	0	FALSE	0	0.99	FALSE	1
562	1173.52	4	IgG3		1	EEQYNSTFR	EEQYN[4.562]STFR	2	Y	1	1	4	IgG3	0	FALSE	0	0.99	FALSE	1
587	1173.52	4	IgG3		1	EEQYNSTFR	EEQYN[4.587]STFR	2	Y	1	1	4	IgG3	0	FALSE	0	0.99	FALSE	1
612	1173.52	4	IgG3		1	EEQYNSTFR	EEQYN[4.612]STFR	2	Y	1	1	4	IgG3	0	FALSE	0	0.99	FALSE	1
637	1173.52	4	IgG3		1	EEQYNSTFR	EEQYN[4.637]STFR	2	Y	1	1	4	IgG3	0	FALSE	0	0.99	FALSE	1
662	1173.52	4	IgG3		1	EEQYNSTFR	EEQYN[4.662]STFR	2	Y	1	1	4	IgG3	0	FALSE	0	0.99	FALSE	1
687	1173.52	4	IgG3		1	EEQYNSTFR	EEQYN[4.687]STFR	2	Y	1	1	4	IgG3	0	FALSE	0	0.99	FALSE	1
712	1173.52	4	IgG3		1	EEQYNSTFR	EEQYN[4.712]STFR	2	Y	1	1	4	IgG3	0	FALSE	0	0.99	FALSE	1
737	1173.52	4	IgG3		1	EEQYNSTFR	EEQYN[4.737]STFR	2	Y	1	1	4	IgG3	0	FALSE	0	0.99	FALSE	1
762	1173.52	4	IgG3		1	EEQYNSTFR	EEQYN[4.762]STFR	2	Y	1	1	4	IgG3	0	FALSE	0	0.99	FALSE	1
787	1173.52	4	IgG3		1	EEQYNSTFR	EEQYN[4.787]STFR	2	Y	1	1	4	IgG3	0	FALSE	0	0.99	FALSE	1
812	1173.52	4	IgG3		1	EEQYNSTFR	EEQYN[4.812]STFR	2	Y	1	1	4	IgG3	0	FALSE	0	0.99	FALSE	1
837	1173.52	4	IgG3		1	EEQYNSTFR	EEQYN[4.837]STFR	2	Y	1	1	4	IgG3	0	FALSE	0	0.99	FALSE	1
862	1173.52	4	IgG3		1	EEQYNSTFR	EEQYN[4.862]STFR	2	Y	1	1	4	IgG3	0	FALSE	0	0.99	FALSE	1
887	1173.52	4	IgG3		1	EEQYNSTFR	EEQYN[4.887]STFR	2	Y	1	1	4	IgG3	0	FALSE	0	0.99	FALSE	1
912	1173.52	4	IgG3		1	EEQYNSTFR	EEQYN[4.912]STFR	2	Y	1	1	4	IgG3	0	FALSE	0	0.99	FALSE	1
937	1173.52	4	IgG3		1	EEQYNSTFR	EEQYN[4.937]STFR	2	Y	1	1	4	IgG3	0	FALSE	0	0.99	FALSE	1
962	1173.52	4	IgG3		1	EEQYNSTFR	EEQYN[4.962]STFR	2	Y	1	1	4	IgG3	0	FALSE	0	0.99	FALSE	1
987	1173.52	4	IgG3		1	EEQYNSTFR	EEQYN[4.987]STFR	2	Y	1	1	4	IgG3	0	FALSE	0	0.99	FALSE	1
1012	1173.52	4	IgG3		1	EEQYNSTFR	EEQYN[4.1012]STFR	2	Y	1	1	4	IgG3	0	FALSE	0	0.99	FALSE	1
1037	1173.52	4	IgG3		1	EEQYNSTFR	EEQYN[4.1037]STFR	2	Y	1	1	4	IgG3	0	FALSE	0	0.99	FALSE	1
1062	1173.52	4	IgG3		1	EEQYNSTFR	EEQYN[4.1062]STFR	2	Y	1	1	4	IgG3	0	FALSE	0	0.99	FALSE	1
1087	1173.52	4	IgG3		1	EEQYNSTFR	EEQYN[4.1087]STFR	2	Y	1	1	4	IgG3	0	FALSE	0	0.99	FALSE	1
1112	1173.52	4	IgG3		1	EEQYNSTFR	EEQYN[4.1112]STFR	2	Y	1	1	4	IgG3	0	FALSE	0	0.99	FALSE	1
1137	1173.52	4	IgG3		1	EEQYNSTFR	EEQYN[4.1137]STFR	2	Y	1	1	4	IgG3	0	FALSE	0	0.99	FALSE	1
1162	1173.52	4	IgG3		1	EEQYNSTFR	EEQYN[4.1162]STFR	2	Y	1	1	4	IgG3	0	FALSE	0	0.99	FALSE	1
1187	1173.52	4	IgG3		1	EEQYNSTFR	EEQYN[4.1187]STFR	2	Y	1	1	4	IgG3	0	FALSE	0	0.99	FALSE	1
1212	1173.52	4	IgG3		1	EEQYNSTFR	EEQYN[4.1212]STFR	2	Y	1	1	4	IgG3	0	FALSE	0	0.99	FALSE	1
1237	1173.52	4	IgG3		1	EEQYNSTFR	EEQYN[4.1237]STFR	2	Y	1	1	4	IgG3	0	FALSE	0	0.99	FALSE	1
412.5	587.262	4	IgG3		1	EEQYNSTFR	EEQYN[4.412]STFR	2	Y	2	1	4	IgG3	0	FALSE	0	0.99	FALSE	1
437	587.262	4	IgG3		1	EEQYNSTFR	EEQYN[4.437]STFR	2	Y	2	1	4	IgG3	0	FALSE	0	0.99	FALSE	1
462	587.262	4	IgG3		1	EEQYNSTFR	EEQYN[4.462]STFR	2	Y	2	1	4	IgG3	0	FALSE	0	0.99	FALSE	1
487	587.262	4	IgG3		1	EEQYNSTFR	EEQYN[4.487]STFR	2	Y	2	1	4	IgG3	0	FALSE	0	0.99	FALSE	1
512	587.262	4	IgG3		1	EEQYNSTFR	EEQYN[4.512]STFR	2	Y	2	1	4	IgG3	0	FALSE	0	0.99	FALSE	1
537	587.262	4	IgG3		1	EEQYNSTFR	EEQYN[4.537]STFR	2	Y	2	1	4	IgG3	0	FALSE	0	0.99	FALSE	1
562	587.262	4	IgG3		1	EEQYNSTFR	EEQYN[4.562]STFR	2	Y	2	1	4	IgG3	0	FALSE	0	0.99	FALSE	1
587	587.262	4	IgG3		1	EEQYNSTFR	EEQYN[4.587]STFR	2	Y	2	1	4	IgG3	0	FALSE	0	0.99	FALSE	1
612	587.262	4	IgG3		1	EEQYNSTFR	EEQYN[4.612]STFR	2	Y	2	1	4	IgG3	0	FALSE	0	0.99	FALSE	1
637	587.262	4	IgG3		1	EEQYNSTFR	EEQYN[4.637]STFR	2	Y	2	1	4	IgG3	0	FALSE	0	0.99	FALSE	1
662	587.262	4	IgG3		1	EEQYNSTFR	EEQYN[4.662]STFR	2	Y	2	1	4	IgG3	0	FALSE	0	0.99	FALSE	1
687	587.262	4	IgG3		1	EEQYNSTFR	EEQYN[4.687]STFR	2	Y	2	1	4	IgG3	0	FALSE	0	0.99	FALSE	1
712	587.262	4	IgG3		1	EEQYNSTFR	EEQYN[4.712]STFR	2	Y	2	1	4	IgG3	0	FALSE	0	0.99	FALSE	1
737	587.262	4	IgG3		1	EEQYNSTFR	EEQYN[4.737]STFR	2	Y	2	1	4	IgG3	0	FALSE	0	0.99	FALSE	1
762	587.262	4	IgG3		1	EEQYNSTFR	EEQYN[4.762]STFR	2	Y	2	1	4	IgG3	0	FALSE	0	0.99	FALSE	1
787	587.262	4	IgG3		1	EEQYNSTFR	EEQYN[4.787]STFR	2	Y	2	1	4	IgG3	0	FALSE	0	0.99	FALSE	1
812	587.262	4	IgG3		1	EEQYNSTFR	EEQYN[4.812]STFR	2	Y	2	1	4	IgG3	0	FALSE	0	0.99	FALSE	1
837	587.262	4	IgG3		1	EEQYNSTFR	EEQYN[4.837]STFR	2	Y	2	1	4	IgG3	0	FALSE	0	0.99	FALSE	1
862	587.262	4	IgG3		1	EEQYNSTFR	EEQYN[4.862]STFR	2	Y	2	1	4	IgG3	0	FALSE	0	0.99	FALSE	1
887	587.262	4	IgG3		1	EEQYNSTFR	EEQYN[4.887]STFR	2	Y	2	1	4	IgG3	0	FALSE	0	0.99	FALSE	1
912	587.262	4	IgG3		1	EEQYNSTFR	EEQYN[4.912]STFR	2	Y	2	1	4	IgG3	0	FALSE	0	0.99	FALSE	1
937	587.262	4	IgG3		1	EEQYNSTFR	EEQYN[4.937]STFR	2	Y	2	1	4	IgG3	0	FALSE	0	0.99	FALSE	1
962	587.262	4	IgG3		1	EEQYNSTFR	EEQYN[4.962]STFR	2	Y	2	1	4	IgG3	0	FALSE	0	0.99	FALSE	1
987	587.262	4	IgG3		1	EEQYNSTFR	EEQYN[4.987]STFR	2	Y	2	1	4	IgG3	0	FALSE	0	0.99	FALSE	1
1012	587.262	4	IgG3		1	EEQYNSTFR	EEQYN[4.1012]STFR	2	Y	2	1	4	IgG3	0	FALSE	0	0.99	FALSE	1
1037	587.262	4	IgG3		1	EEQYNSTFR	EEQYN[4.1037]STFR	2	Y	2	1	4	IgG3	0	FALSE	0	0.99	FALSE	1
1062	587.262	4	IgG3		1	EEQYNSTFR	EEQYN[4.1062]STFR	2	Y	2	1	4	IgG3	0	FALSE	0	0.99	FALSE	1
1087	587.262	4	IgG3		1	EEQYNSTFR	EEQYN[4.1087]STFR	2	Y	2	1	4	IgG3	0	FALSE	0	0.99	FALSE	1
1112	587.262	4	IgG3		1	EEQYNSTFR	EEQYN[4.1112]STFR	2	Y	2	1	4	IgG3	0	FALSE	0	0.99	FALSE	1
1137	587.262	4	IgG3		1	EEQYNSTFR	EEQYN[4.1137]STFR	2	Y	2	1	4	IgG3	0	FALSE	0	0.99	FALSE	1
1162	587.262	4	IgG3		1	EEQYNSTFR	EEQYN[4.1162]STFR	2	Y	2	1	4	IgG3	0	FALSE	0	0.99	FALSE	1
1187	587.262	4	IgG3		1	EEQYNSTFR	EEQYN[4.1187]STFR	2	Y	2	1	4	IgG3	0	FALSE	0	0.99	FALSE	1
1212	587.262	4	IgG3		1	EEQYNSTFR	EEQYN[4.1212]STFR	2	Y	2	1	4	IgG3	0	FALSE	0	0.99	FALSE	1
1237	587.262	4	IgG3		1	EEQYNSTFR	EEQYN[4.1237]STFR	2	Y	2	1	4	IgG3	0	FALSE	0	0.99	FALSE	1
412.5	1173.52	5	IgG3		1	EEQYNSTFR	EEQYN[5.412]STFR	2	Y	1	1	5	IgG3	0	FALSE	0	0.99	FALSE	1
437	1173.52	5	IgG3		1	EEQYNSTFR	EEQYN[5.437]STFR	2	Y	1	1	5	IgG3	0	FALSE	0	0.99	FALSE	1
462	1173.52	5	IgG3		1	EEQYNSTFR	EEQYN[5.462]STFR	2	Y	1	1	5	IgG3	0	FALSE	0	0.99	FALSE	1
487	1173.52	5	IgG3		1	EEQYNSTFR	EEQYN[5.487]STFR	2	Y	1	1	5	IgG3	0	FALSE	0	0.99	FALSE	1
512	1173.52	5	IgG3		1	EEQYNSTFR	EEQYN[5.512]STFR	2	Y	1	1	5	IgG3	0	FALSE	0	0.99	FALSE	1
537	1173.52	5	IgG3		1	EEQYNSTFR	EEQYN[5.537]STFR	2	Y	1	1	5	IgG3	0	FALSE	0	0.99	FALSE	1
562	1173.52	5	IgG3		1	EEQYNSTFR	EEQYN[5.562]STFR	2	Y	1	1	5	IgG3	0	FALSE	0	0.99	FALSE	1
587	1173.52	5	IgG3		1	EEQYNSTFR	EEQYN[5.587]STFR	2	Y	1	1	5	IgG3	0	FALSE	0	0.99	FALSE	1
612	1173.52	5	IgG3		1	EEQYNSTFR	EEQYN[5.612]STFR	2	Y	1	1	5	IgG3	0	FALSE	0	0.99	FALSE	1
637	1173.52	5	IgG3		1	EEQYNSTFR	EEQYN[5.637]STFR	2	Y	1	1	5	IgG3	0	FALSE	0	0.99	FALSE	1
662	1173.52	5	IgG3		1	EEQYNSTFR	EEQYN[5.662]STFR	2	Y	1	1	5	IgG3	0	FALSE	0	0.99	FALSE	1
687	1173.52	5	IgG3		1	EEQYNSTFR	EEQYN[5.687]STFR	2	Y	1	1	5	IgG3	0	FALSE	0	0.99	FALSE	1
712	1173.52	5	IgG3		1	EEQYNSTFR	EEQYN[5.712]STFR	2	Y	1	1	5	IgG3	0	FALSE	0	0.99	FALSE	1
737	1173.52	5	IgG3		1	EEQYNSTFR	EEQYN[5.737]STFR	2	Y	1	1	5	IgG3	0	FALSE	0	0.99	FALSE	1
762	1173.52	5	IgG3		1	EEQYNSTFR	EEQYN[5.762]STFR	2	Y	1	1	5	IgG3	0	FALSE	0	0.99	FALSE	1
787	1173.52	5	IgG3		1	EEQYNSTFR	EEQYN[5.787]STFR	2	Y	1	1	5	IgG3	0	FALSE	0	0.99	FALSE	1
812	1173.52	5	IgG3		1	EEQYNSTFR	EEQYN[5.812]STFR	2	Y	1	1	5	IgG3	0	FALSE	0	0.99	FALSE	1
837	1173.52	5	IgG3		1	EEQYNSTFR	EEQYN[5.837]STFR	2	Y	1	1	5	IgG3	0	FALSE	0	0.99	FALSE	1
862	1173.52	5	IgG3		1	EEQYNSTFR	EEQYN[5.862]STFR	2	Y	1	1	5	IgG3	0	FALSE	0	0.99	FALSE	1
887	1173.52	5	IgG3		1	EEQYNSTFR	EEQYN[5.887]STFR	2	Y	1	1	5	IgG3	0	FALSE	0	0.99	FALSE	1
912	1173.52	5	IgG3		1	EEQYNSTFR	EEQYN[5.912]STFR	2	Y	1	1	5	IgG3	0	FALSE	0	0.99	FALSE	1
937	1173.52	5	IgG3		1	EEQYNSTFR	EEQYN[5.937]STFR	2	Y	1	1	5	IgG3	0	FALSE	0	0.99	FALSE	1
962	1173.52	5	IgG3		1	EEQYNSTFR	EEQYN[5.962]STFR	2	Y	1	1	5	IgG3	0	FALSE	0	0.99	FALSE	1
987	1173.52	5	IgG3		1	EEQYNSTFR	EEQYN[5.987]STFR	2	Y	1	1	5	IgG3	0	FALSE	0	0.99	FALSE	1
1012	1173.52	5	IgG3		1	EEQYNSTFR	EEQYN[5.1012]STFR	2	Y	1	1	5	IgG3	0	FALSE	0	0.99	FALSE	1
1037	1173.52	5	IgG3		1	EEQYNSTFR	EEQYN[5.1037]STFR	2	Y	1	1	5	IgG3	0	FALSE	0	0.99	FALSE	1
1062	1173.52	5	IgG3		1	EEQYNSTFR	EEQYN[5.1062]STFR	2	Y	1	1	5	IgG3	0	FALSE	0	0.99	FALSE	1
1087	1173.52	5	IgG3		1	EEQYNSTFR	EEQYN[5.1087]STFR	2	Y	1	1	5	IgG3	0	FALSE	0	0.99	FALSE	1
1112	1173.52	5	IgG3		1	EEQYNSTFR	EEQYN[5.1112]STFR	2	Y	1	1	5	IgG3	0	FALSE	0	0.99	FALSE	1
1137	1173.52	5	IgG3		1	EEQYNSTFR	EEQYN[5.1137]STFR	2	Y	1	1	5	IgG3	0	FALSE	0	0.99	FALSE	1
1162	1173.52	5	IgG3		1	EEQYNSTFR	EEQYN[5.1162]STFR	2	Y	1	1	5	IgG3	0	FALSE	0	0.99	FALSE	1
1187	1173.52	5	IgG3		1	EEQYNSTFR	EEQYN[5.1187]STFR	2	Y	1	1	5	IgG3	0	FALSE	0	0.99	FALSE	1
1212	1173.52	5	IgG3		1	EEQYNSTFR	EEQYN[5.1212]STFR	2	Y	1	1	5	IgG3	0	FALSE	0	0.99	FALSE	1
1237	1173.52	5	IgG3		1	EEQYNSTFR	EEQYN[5.1237]STFR	2	Y	1	1	5	IgG3	0	FALSE	0	0.99	FALSE	1
412.5	587.262	5	IgG3		1	EEQYNSTFR	EEQYN[5.412]STFR	2	Y	2	1	5	IgG3	0	FALSE	0	0.99	FALSE	1
437	587.262	5	IgG3		1	EEQYNSTFR	EEQYN[5.437]STFR	2	Y	2	1	5	IgG3	0	FALSE	0	0.99	FALSE	1
462	587.262	5	IgG3		1	EEQYNSTFR	EEQYN[5.462]STFR	2	Y	2	1	5	IgG3	0	FALSE	0	0.99	FALSE	1
487	587.262	5	IgG3		1	EEQYNSTFR	EEQYN[5.487]STFR	2	Y	2	1	5	IgG3	0	FALSE	0	0.99	FALSE	1
512	587.262	5	IgG3		1	EEQYNSTFR	EEQYN[5.512]STFR	2	Y	2	1	5	IgG3	0	FALSE	0	0.99	FALSE	1
537	587.262	5	IgG3		1	EEQYNSTFR	EEQYN[5.537]STFR	2	Y	2	1	5	IgG3	0	FALSE	0	0.99	FALSE	1
562	587.262	5	IgG3		1	EEQYNSTFR	EEQYN[5.562]STFR	2	Y	2	1	5	IgG3	0	FALSE	0	0.99	FALSE	1
587	587.262	5	IgG3		1	EEQYNSTFR	EEQYN[5.587]STFR	2	Y	2	1	5	IgG3	0	FALSE	0	0.99	FALSE	1
612	587.262	5	IgG3		1	EEQYNSTFR	EEQYN[5.612]STFR	2	Y	2	1	5	IgG3	0	FALSE	0	0.99	FALSE	1
637	587.262	5	IgG3		1	EEQYNSTFR	EEQYN[5.637]STFR	2	Y	2	1	5	IgG3	0	FALSE	0	0.99	FALSE	1
662	587.262	5	IgG3		1	EEQYNSTFR	EEQYN[5.662]STFR	2	Y	2	1	5	IgG3	0	FALSE	0	0.99	FALSE	1
687	587.262	5	IgG3		1	EEQYNSTFR	EEQYN[5.687]STFR	2	Y	2	1	5	IgG3	0	FALSE	0	0.99	FALSE	1
712	587.262	5	IgG3		1	EEQYNSTFR	EEQYN[5.712]STFR	2	Y	2	1	5	IgG3	0	FALSE	0	0.99	FALSE	1
737	587.262	5	IgG3		1	EEQYNSTFR	EEQYN[5.737]STFR	2	Y	2	1	5	IgG3	0	FALSE	0	0.99	FALSE	1
762	587.262	5	IgG3		1	EEQYNSTFR	EEQYN[5.762]STFR	2	Y	2	1	5	IgG3	0	FALSE	0	0.99	FALSE	1
787	587.262	5	IgG3		1	EEQYNSTFR	EEQYN[5.787]STFR	2	Y	2	1	5	IgG3	0	FALSE	0	0.99	FALSE	1
812	587.262	5	IgG3		1	EEQYNSTFR	EEQYN[5.812]STFR	2	Y	2	1	5	IgG3	0	FALSE	0	0.99	FALSE	1
837	587.262	5	IgG3		1	EEQYNSTFR	EEQYN[5.837]STFR	2	Y	2	1	5	IgG3	0	FALSE	0	0.99	FALSE	1
862	587.262	5	IgG3		1	EEQYNSTFR	EEQYN[5.862]STFR	2	Y	2	1	5	IgG3	0	FALSE	0	0.99	FALSE	1
887	587.262	5	IgG3		1	EEQYNSTFR	EEQYN[5.887]STFR	2	Y	2	1	5	IgG3	0	FALSE	0	0.99	FALSE	1
912	587.262	5	IgG3		1	EEQYNSTFR	EEQYN[5.912]STFR	2	Y	2	1	5	IgG3	0	FALSE	0	0.99	FALSE	1
937	587.262	5	IgG3		1	EEQYNSTFR	EEQYN[5.937]STFR	2	Y	2	1	5	IgG3	0	FALSE	0	0.99	FALSE	1
962	587.262	5	IgG3		1	EEQYNSTFR	EEQYN[5.962]STFR	2	Y	2	1	5	IgG3	0	FALSE	0	0.99	FALSE	1
987	587.262	5	IgG3		1	EEQYNSTFR	EEQYN[5.987]STFR	2	Y	2	1	5	IgG3	0	FALSE	0	0.99	FALSE	1
1012	587.262	5	IgG3		1	EEQYNSTFR	EEQYN[5.1012]STFR	2	Y	2	1	5	IgG3	0	FALSE	0	0.99	FALSE	1
1037	587.262	5	IgG3		1	EEQYNSTFR	EEQYN[5.1037]STFR	2	Y	2	1	5	IgG3	0	FALSE	0	0.99	FALSE	1
1062	587.262	5	IgG3		1	EEQYNSTFR	EEQYN[5.1062]STFR	2	Y	2	1	5	IgG3	0	FALSE	0	0.99	FALSE	1
1087	587.262	5	IgG3		1	EEQYNSTFR	EEQYN[5.1087]STFR	2	Y	2	1	5	IgG3	0	FALSE	0	0.99	FALSE	1
1112	587.262	5	IgG3		1	EEQYNSTFR	EEQYN[5.1112]STFR	2	Y	2	1	5	IgG3	0	FALSE	0	0.99	FALSE	1
1137	587.262	5	IgG3		1	EEQYNSTFR	EEQYN[5.1137]STFR	2	Y	2	1	5	IgG3	0	FALSE	0	0.99	FALSE	1
1162	587.262	5	IgG3		1	EEQYNSTFR	EEQYN[5.1162]STFR	2	Y	2	1	5	IgG3	0	FALSE	0	0.99	FALSE	1
1187	587.262	5	IgG3		1	EEQYNSTFR	EEQYN[5.1187]STFR	2	Y	2	1	5	IgG3	0	FALSE	0	0.99	FALSE	1
1212	587.262	5	IgG3		1	EEQYNSTFR	EEQYN[5.1212]STFR	2	Y	2	1	5	IgG3	0	FALSE	0	0.99	FALSE	1
1237	587.262	5	IgG3		1	EEQYNSTFR	EEQYN[5.1237]STFR	2	Y	2	1	5	IgG3	0	FALSE	0	0.99	FALSE	1
412.5	1173.52	6	IgG3		1	EEQYNSTFR	EEQYN[6.412]STFR	2	Y	1	1	6	IgG3	0	FALSE	0	0.99	FALSE	1
437	1173.52	6	IgG3		1	EEQYNSTFR	EEQYN[6.437]STFR	2	Y	1	1	6	IgG3	0	FALSE	0	0.99	FALSE	1
462	1173.52	6	IgG3		1	EEQYNSTFR	EEQYN[6.462]STFR	2	Y	1	1	6	IgG3	0	FALSE	0	0.99	FALSE	1
487	1173.52	6	IgG3		1	EEQYNSTFR	EEQYN[6.487]STFR	2	Y	1	1	6	IgG3	0	FALSE	0	0.99	FALSE	1
512	1173.52	6	IgG3		1	EEQYNSTFR	EEQYN[6.512]STFR	2	Y	1	1	6	IgG3	0	FALSE	0	0.99	FALSE	1
537	1173.52	6	IgG3		1	EEQYNSTFR	EEQYN[6.537]STFR	2	Y	1	1	6	IgG3	0	FALSE	0	0.99	FALSE	1
562	1173.52	6	IgG3		1	EEQYNSTFR	EEQYN[6.562]STFR	2	Y	1	1	6	IgG3	0	FALSE	0	0.99	FALSE	1
587	1173.52	6	IgG3		1	EEQYNSTFR	EEQYN[6.587]STFR	2	Y	1	1	6	IgG3	0	FALSE	0	0.99	FALSE	1
612	1173.52	6	IgG3		1	EEQYNSTFR	EEQYN[6.612]STFR	2	Y	1	1	6	IgG3	0	FALSE	0	0.99	FALSE	1
637	1173.52	6	IgG3		1	EEQYNSTFR	EEQYN[6.637]STFR	2	Y	1	1	6	IgG3	0	FALSE	0	0.99	FALSE	1
662	1173.52	6	IgG3		1	EEQYNSTFR	EEQYN[6.662]STFR	2	Y	1	1	6	IgG3	0	FALSE	0	0.99	FALSE	1
687	1173.52	6	IgG3		1	EEQYNSTFR	EEQYN[6.687]STFR	2	Y	1	1	6	IgG3	0	FALSE	0	0.99	FALSE	1
712	1173.52	6	IgG3		1	EEQYNSTFR	EEQYN[6.712]STFR	2	Y	1	1	6	IgG3	0	FALSE	0	0.99	FALSE	1
737	1173.52	6	IgG3		1	EEQYNSTFR	EEQYN[6.737]STFR	2	Y	1	1	6	IgG3	0	FALSE	0	0.99	FALSE	1
762	1173.52	6	IgG3		1	EEQYNSTFR	EEQYN[6.762]STFR	2	Y	1	1	6	IgG3	0	FALSE	0	0.99	FALSE	1
787	1173.52	6	IgG3		1	EEQYNSTFR	EEQYN[6.787]STFR	2	Y	1	1	6	IgG3	0	FALSE	0	0.99	FALSE	1
812	1173.52	6	IgG3		1	EEQYNSTFR	EEQYN[6.812]STFR	2	Y	1	1	6	IgG3	0	FALSE	0	0.99	FALSE	1
837	1173.52	6	IgG3		1	EEQYNSTFR	EEQYN[6.837]STFR	2	Y	1	1	6	IgG3	0	FALSE	0	0.99	FALSE	1
862	1173.52	6	IgG3		1	EEQYNSTFR	EEQYN[6.862]STFR	2	Y	1	1	6	IgG3	0	FALSE	0	0.99	FALSE	1
887	1173.52	6	IgG3		1	EEQYNSTFR	EEQYN[6.887]STFR	2	Y	1	1	6	IgG3	0	FALSE	0	0.99	FALSE	1
912	1173.52	6	IgG3		1	EEQYNSTFR	EEQYN[6.912]STFR	2	Y	1	1	6	IgG3	0	FALSE	0	0.99	FALSE	1
937	1173.52	6	IgG3		1	EEQYNSTFR	EEQYN[6.937]STFR	2	Y	1	1	6	IgG3	0	FALSE	0	0.99	FALSE	1
962	1173.52	6	IgG3		1	EEQYNSTFR	EEQYN[6.962]STFR	2	Y	1	1	6	IgG3	0	FALSE	0	0.99	FALSE	1
987	1173.52	6	IgG3		1	EEQYNSTFR	EEQYN[6.987]STFR	2	Y	1	1	6	IgG3	0	FALSE	0	0.99	FALSE	1
1012	1173.52	6	IgG3		1	EEQYNSTFR	EEQYN[6.1012]STFR	2	Y	1	1	6	IgG3	0	FALSE	0	0.99	FALSE	1
1037	1173.52	6	IgG3		1	EEQYNSTFR	EEQYN[6.1037]STFR	2	Y	1	1	6	IgG3	0	FALSE	0	0.99	FALSE	1
1062	1173.52	6	IgG3		1	EEQYNSTFR	EEQYN[6.1062]STFR	2	Y	1	1	6	IgG3	0	FALSE	0	0.99	FALSE	1
1087	1173.52	6	IgG3		1	EEQYNSTFR	EEQYN[6.1087]STFR	2	Y	1	1	6	IgG3	0	FALSE	0	0.99	FALSE	1
1112	1173.52	6	IgG3		1	EEQYNSTFR	EEQYN[6.1112]STFR	2	Y	1	1	6	IgG3	0	FALSE	0	0.99	FALSE	1
1137	1173.52	6	IgG3		1	EEQYNSTFR	EEQYN[6.1137]STFR	2	Y	1	1	6	IgG3	0	FALSE	0	0.99	FALSE	1
1162	1173.52	6	IgG3		1	EEQYNSTFR	EEQYN[6.1162]STFR	2	Y	1	1	6	IgG3	0	FALSE	0	0.99	FALSE	1
1187	1173.52	6	IgG3		1	EEQYNSTFR	EEQYN[6.1187]STFR	2	Y	1	1	6	IgG3	0	FALSE	0	0.99	FALSE	1
1212	1173.52	6	IgG3		1	EEQYNSTFR	EEQYN[6.1212]STFR	2	Y	1	1	6	IgG3	0	FALSE	0	0.99	FALSE	1
1237	1173.52	6	IgG3		1	EEQYNSTFR	EEQYN[6.1237]STFR	2	Y	1	1	6	IgG3	0	FALSE	0	0.99	FALSE	1
412.5	587.262	6	IgG3		1	EEQYNSTFR	EEQYN[6.412]STFR	2	Y	2	1	6	IgG3	0	FALSE	0	0.99	FALSE	1
437	587.262	6	IgG3		1	EEQYNSTFR	EEQYN[6.437]STFR	2	Y	2	1	6	IgG3	0	FALSE	0	0.99	FALSE	1
462	587.262	6	IgG3		1	EEQYNSTFR	EEQYN[6.462]STFR	2	Y	2	1	6	IgG3	0	FALSE	0	0.99	FALSE	1
487	587.262	6	IgG3		1	EEQYNSTFR	EEQYN[6.487]STFR	2	Y	2	1	6	IgG3	0	FALSE	0	0.99	FALSE	1
512	587.262	6	IgG3		1	EEQYNSTFR	EEQYN[6.512]STFR	2	Y	2	1	6	IgG3	0	FALSE	0	0.99	FALSE	1
537	587.262	6	IgG3		1	EEQYNSTFR	EEQYN[6.537]STFR	2	Y	2	1	6	IgG3	0	FALSE	0	0.99	FALSE	1
562	587.262	6	IgG3		1	EEQYNSTFR	EEQYN[6.562]STFR	2	Y	2	1	6	IgG3	0	FALSE	0	0.99	FALSE	1
587	587.262	6	IgG3		1	EEQYNSTFR	EEQYN[6.587]STFR	2	Y	2	1	6	IgG3	0	FALSE	0	0.99	FALSE	1
612	587.262	6	IgG3		1	EEQYNSTFR	EEQYN[6.612]STFR	2	Y	2	1	6	IgG3	0	FALSE	0	0.99	FALSE	1
637	587.262	6	IgG3		1	EEQYNSTFR	EEQYN[6.637]STFR	2	Y	2	1	6	IgG3	0	FALSE	0	0.99	FALSE	1
662	587.262	6	IgG3		1	EEQYNSTFR	EEQYN[6.662]STFR	2	Y	2	1	6	IgG3	0	FALSE	0	0.99	FALSE	1
687	587.262	6	IgG3		1	EEQYNSTFR	EEQYN[6.687]STFR	2	Y	2	1	6	IgG3	0	FALSE	0	0.99	FALSE	1
712	587.262	6	IgG3		1	EEQYNSTFR	EEQYN[6.712]STFR	2	Y	2	1	6	IgG3	0	FALSE	0	0.99	FALSE	1
737	587.262	6	IgG3		1	EEQYNSTFR	EEQYN[6.737]STFR	2	Y	2	1	6	IgG3	0	FALSE	0	0.99	FALSE	1
762	587.262	6	IgG3		1	EEQYNSTFR	EEQYN[6.762]STFR	2	Y	2	1	6	IgG3	0	FALSE	0	0.99	FALSE	1
787	587.262	6	IgG3		1	EEQYNSTFR	EEQYN[6.787]STFR	2	Y	2	1	6	IgG3	0	FALSE	0	0.99	FALSE	1
812	587.262	6	IgG3		1	EEQYNSTFR	EEQYN[6.812]STFR	2	Y	2	1	6	IgG3	0	FALSE	0	0.99	FALSE	1
837	587.262	6	IgG3		1	EEQYNSTFR	EEQYN[6.837]STFR	2	Y	2	1	6	IgG3	0	FALSE	0	0.99	FALSE	1
862	587.262	6	IgG3		1	EEQYNSTFR	EEQYN[6.862]STFR	2	Y	2	1	6	IgG3	0	FALSE	0	0.99	FALSE	1
887	587.262	6	IgG3		1	EEQYNSTFR	EEQYN[6.887]STFR	2	Y	2	1	6	IgG3	0	FALSE	0	0.99	FALSE	1
912	587.262	6	IgG3		1	EEQYNSTFR	EEQYN[6.912]STFR	2	Y	2	1	6	IgG3	0	FALSE	0	0.99	FALSE	1
937	587.262	6	IgG3		1	EEQYNSTFR	EEQYN[6.937]STFR	2	Y	2	1	6	IgG3	0	FALSE	0	0.99	FALSE	1
962	587.262	6	IgG3		1	EEQYNSTFR	EEQYN[6.962]STFR	2	Y	2	1	6	IgG3	0	FALSE	0	0.99	FALSE	1
987	587.262	6	IgG3		1	EEQYNSTFR	EEQYN[6.987]STFR	2	Y	2	1	6	IgG3	0	FALSE	0	0.99	FALSE	1
1012	587.262	6	IgG3		1	EEQYNSTFR	EEQYN[6.1012]STFR	2	Y	2	1	6	IgG3	0	FALSE	0	0.99	FALSE	1
1037	587.262	6	IgG3		1	EEQYNSTFR	EEQYN[6.1037]STFR	2	Y	2	1	6	IgG3	0	FALSE	0	0.99	FALSE	1
1062	587.262	6	IgG3		1	EEQYNSTFR	EEQYN[6.1062]STFR	2	Y	2	1	6	IgG3	0	FALSE	0	0.99	FALSE	1
1087	587.262	6	IgG3		1	EEQYNSTFR	EEQYN[6.1087]STFR	2	Y	2	1	6	IgG3	0	FALSE	0	0.99	FALSE	1
1112	587.262	6	IgG3		1	EEQYNSTFR	EEQYN[6.1112]STFR	2	Y	2	1	6	IgG3	0	FALSE	0	0.99	FALSE	1
1137	587.262	6	IgG3		1	EEQYNSTFR	EEQYN[6.1137]STFR	2	Y	2	1	6	IgG3	0	FALSE	0	0.99	FALSE	1
1162	587.262	6	IgG3		1	EEQYNSTFR	EEQYN[6.1162]STFR	2	Y	2	1	6	IgG3	0	FALSE	0	0.99	FALSE	1
1187	587.262	6	IgG3		1	EEQYNSTFR	EEQYN[6.1187]STFR	2	Y	2	1	6	IgG3	0	FALSE	0	0.99	FALSE	1
1212	587.262	6	IgG3		1	EEQYNSTFR	EEQYN[6.1212]STFR	2	Y	2	1	6	IgG3	0	FALSE	0	0.99	FALSE	1
1237	587.262	6	IgG3		1	EEQYNSTFR	EEQYN[6.1237]STFR	2	Y	2	1	6	IgG3	0	FALSE	0	0.99	FALSE	1
412.5	1173.52	7	IgG3		1	EEQYNSTFR	EEQYN[7.412]STFR	2	Y	1	1	7	IgG3	0	FALSE	0	0.99	FALSE	1
437	1173.52	7	IgG3		1	EEQYNSTFR	EEQYN[7.437]STFR	2	Y	1	1	7	IgG3	0	FALSE	0	0.99	FALSE	1
462	1173.52	7	IgG3		1	EEQYNSTFR	EEQYN[7.462]STFR	2	Y	1	1	7	IgG3	0	FALSE	0	0.99	FALSE	1
487	1173.52	7	IgG3		1	EEQYNSTFR	EEQYN[7.487]STFR	2	Y	1	1	7	IgG3	0	FALSE	0	0.99	FALSE	1
512	1173.52	7	IgG3		1	EEQYNSTFR	EEQYN[7.512]STFR	2	Y	1	1	7	IgG3	0	FALSE	0	0.99	FALSE	1
537	1173.52	7	IgG3		1	EEQYNSTFR	EEQYN[7.537]STFR	2	Y	1	1	7	IgG3	0	FALSE	0	0.99	FALSE	1
562	1173.52	7	IgG3		1	EEQYNSTFR	EEQYN[7.562]STFR	2	Y	1	1	7	IgG3	0	FALSE	0	0.99	FALSE	1
587	1173.52	7	IgG3		1	EEQYNSTFR	EEQYN[7.587]STFR	2	Y	1	1	7	IgG3	0	FALSE	0	0.99	FALSE	1
612	1173.52	7	IgG3		1	EEQYNSTFR	EEQYN[7.612]STFR	2	Y	1	1	7	IgG3	0	FALSE	0	0.99	FALSE	1
637	1173.52	7	IgG3		1	EEQYNSTFR	EEQYN[7.637]STFR	2	Y	1	1	7	IgG3	0	FALSE	0	0.99	FALSE	1
662	1173.52	7	IgG3		1	EEQYNSTFR	EEQYN[7.662]STFR	2	Y	1	1	7	IgG3	0	FALSE	0	0.99	FALSE	1
687	1173.52	7	IgG3		1	EEQYNSTFR	EEQYN[7.687]STFR	2	Y	1	1	7	IgG3	0	FALSE	0	0.99	FALSE	1
712	1173.52	7	IgG3		1	EEQYNSTFR	EEQYN[7.712]STFR	2	Y	1	1	7	IgG3	0	FALSE	0	0.99	FALSE	1
737	1173.52	7	IgG3		1	EEQYNSTFR	EEQYN[7.737]STFR	2	Y	1	1	7	IgG3	0	FALSE	0	0.99	FALSE	1
762	1173.52	7	IgG3		1	EEQYNSTFR	EEQYN[7.762]STFR	2	Y	1	1	7	IgG3	0	FALSE	0	0.99	FALSE	1
787	1173.52	7	IgG3		1	EEQYNSTFR	EEQYN[7.787]STFR	2	Y	1	1	7	IgG3	0	FALSE	0	0.99	FALSE	1
812	1173.52	7	IgG3		1	EEQYNSTFR	EEQYN[7.812]STFR	2	Y	1	1	7	IgG3	0	FALSE	0	0.99	FALSE	1
837	1173.52	7	IgG3		1	EEQYNSTFR	EEQYN[7.837]STFR	2	Y	1	1	7	IgG3	0	FALSE	0	0.99	FALSE	1
862	1173.52	7	IgG3		1	EEQYNSTFR	EEQYN[7.862]STFR	2	Y	1	1	7	IgG3	0	FALSE	0	0.99	FALSE	1
887	1173.52	7	IgG3		1	EEQYNSTFR	EEQYN[7.887]STFR	2	Y	1	1	7	IgG3	0	FALSE	0	0.99	FALSE	1
912	1173.52	7	IgG3		1	EEQYNSTFR	EEQYN[7.912]STFR	2	Y	1	1	7	IgG3	0	FALSE	0	0.99	FALSE	1
937	1173.52	7	IgG3		1	EEQYNSTFR	EEQYN[7.937]STFR	2	Y	1	1	7	IgG3	0	FALSE	0	0.99	FALSE	1
962	1173.52	7	IgG3		1	EEQYNSTFR	EEQYN[7.962]STFR	2	Y	1	1	7	IgG3	0	FALSE	0	0.99	FALSE	1
987	1173.52	7	IgG3		1	EEQYNSTFR	EEQYN[7.987]STFR	2	Y	1	1	7	IgG3	0	FALSE	0	0.99	FALSE	1
1012	1173.52	7	IgG3		1	EEQYNSTFR	EEQYN[7.1012]STFR	2	Y	1	1	7	IgG3	0	FALSE	0	0.99	FALSE	1
1037	1173.52	7	IgG3		1	EEQYNSTFR	EEQYN[7.1037]STFR	2	Y	1	1	7	IgG3	0	FALSE	0	0.99	FALSE	1
1062	1173.52	7	IgG3		1	EEQYNSTFR	EEQYN[7.1062]STFR	2	Y	1	1	7	IgG3	0	FALSE	0	0.99	FALSE	1
1087	1173.52	7	IgG3		1	EEQYNSTFR	EEQYN[7.1087]STFR	2	Y	1	1	7	IgG3	0	FALSE	0	0.99	FALSE	1
1112	1173.52	7	IgG3		1	EEQYNSTFR	EEQYN[7.1112]STFR	2	Y	1	1	7	IgG3	0	FALSE	0	0.99	FALSE	1
1137	1173.52	7	IgG3		1	EEQYNSTFR	EEQYN[7.1137]STFR	2	Y	1	1	7	IgG3	0	FALSE	0	0.99	FALSE	1
1162	1173.52	7	IgG3		1	EEQYNSTFR	EEQYN[7.1162]STFR	2	Y	1	1	7	IgG3	0	FALSE	0	0.99	FALSE	1
1187	1173.52	7	IgG3		1	EEQYNSTFR	EEQYN[7.1187]STFR	2	Y	1	1	7	IgG3	0	FALSE	0	0.99	FALSE	1
1212	1173.52	7	IgG3		1	EEQYNSTFR	EEQYN[7.1212]STFR	2	Y	1	1	7	IgG3	0	FALSE	0	0.99	FALSE	1
1237	1173.52	7	IgG3		1	EEQYNSTFR	EEQYN[7.1237]STFR	2	Y	1	1	7	IgG3	0	FALSE	0	0.99	FALSE	1
412.5	587.262	7	IgG3		1	EEQYNSTFR	EEQYN[7.412]STFR	2	Y	2	1	7	IgG3	0	FALSE	0	0.99	FALSE	1
437	587.262	7	IgG3		1	EEQYNSTFR	EEQYN[7.437]STFR	2	Y	2	1	7	IgG3	0	FALSE	0	0.99	FALSE	1
462	587.262	7	IgG3		1	EEQYNSTFR	EEQYN[7.462]STFR	2	Y	2	1	7	IgG3	0	FALSE	0	0.99	FALSE	1
487	587.262	7	IgG3		1	EEQYNSTFR	EEQYN[7.487]STFR	2	Y	2	1	7	IgG3	0	FALSE	0	0.99	FALSE	1
512	587.262	7	IgG3		1	EEQYNSTFR	EEQYN[7.512]STFR	2	Y	2	1	7	IgG3	0	FALSE	0	0.99	FALSE	1
537	587.262	7	IgG3		1	EEQYNSTFR	EEQYN[7.537]STFR	2	Y	2	1	7	IgG3	0	FALSE	0	0.99	FALSE	1
562	587.262	7	IgG3		1	EEQYNSTFR	EEQYN[7.562]STFR	2	Y	2	1	7	IgG3	0	FALSE	0	0.99	FALSE	1
587	587.262	7	IgG3		1	EEQYNSTFR	EEQYN[7.587]STFR	2	Y	2	1	7	IgG3	0	FALSE	0	0.99	FALSE	1
612	587.262	7	IgG3		1	EEQYNSTFR	EEQYN[7.612]STFR	2	Y	2	1	7	IgG3	0	FALSE	0	0.99	FALSE	1
637	587.262	7	IgG3		1	EEQYNSTFR	EEQYN[7.637]STFR	2	Y	2	1	7	IgG3	0	FALSE	0	0.99	FALSE	1
662	587.262	7	IgG3		1	EEQYNSTFR	EEQYN[7.662]STFR	2	Y	2	1	7	IgG3	0	FALSE	0	0.99	FALSE	1
687	587.262	7	IgG3		1	EEQYNSTFR	EEQYN[7.687]STFR	2	Y	2	1	7	IgG3	0	FALSE	0	0.99	FALSE	1
712	587.262	7	IgG3		1	EEQYNSTFR	EEQYN[7.712]STFR	2	Y	2	1	7	IgG3	0	FALSE	0	0.99	FALSE	1
737	587.262	7	IgG3		1	EEQYNSTFR	EEQYN[7.737]STFR	2	Y	2	1	7	IgG3	0	FALSE	0	0.99	FALSE	1
762	587.262	7	IgG3		1	EEQYNSTFR	EEQYN[7.762]STFR	2	Y	2	1	7	IgG3	0	FALSE	0	0.99	FALSE	1
787	587.262	7	IgG3		1	EEQYNSTFR	EEQYN[7.787]STFR	2	Y	2	1	7	IgG3	0	FALSE	0	0.99	FALSE	1
812	587.262	7	IgG3		1	EEQYNSTFR	EEQYN[7.812]STFR	2	Y	2	1	7	IgG3	0	FALSE	0	0.99	FALSE	1
837	587.262	7	IgG3		1	EEQYNSTFR	EEQYN[7.837]STFR	2	Y	2	1	7	IgG3	0	FALSE	0	0.99	FALSE	1
862	587.262	7	IgG3		1	EEQYNSTFR	EEQYN[7.862]STFR	2	Y	2	1	7	IgG3	0	FALSE	0	0.99	FALSE	1
887	587.262	7	IgG3		1	EEQYNSTFR	EEQYN[7.887]STFR	2	Y	2	1	7	IgG3	0	FALSE	0	0.99	FALSE	1
912	587.262	7	IgG3		1	EEQYNSTFR	EEQYN[7.912]STFR	2	Y	2	1	7	IgG3	0	FALSE	0	0.99	FALSE	1
937	587.262	7	IgG3		1	EEQYNSTFR	EEQYN[7.937]STFR	2	Y	2	1	7	IgG3	0	FALSE	0	0.99	FALSE	1
962	587.262	7	IgG3		1	EEQYNSTFR	EEQYN[7.962]STFR	2	Y	2	1	7	IgG3	0	FALSE	0	0.99	FALSE	1
987	587.262	7	IgG3		1	EEQYNSTFR	EEQYN[7.987]STFR	2	Y	2	1	7	IgG3	0	FALSE	0	0.99	FALSE	1
1012	587.262	7	IgG3		1	EEQYNSTFR	EEQYN[7.1012]STFR	2	Y	2	1	7	IgG3	0	FALSE	0	0.99	FALSE	1
1037	587.262	7	IgG3		1	EEQYNSTFR	EEQYN[7.1037]STFR	2	Y	2	1	7	IgG3	0	FALSE	0	0.99	FALSE	1
1062	587.262	7	IgG3		1	EEQYNSTFR	EEQYN[7.1062]STFR	2	Y	2	1	7	IgG3	0	FALSE	0	0.99	FALSE	1
1087	587.262	7	IgG3		1	EEQYNSTFR	EEQYN[7.1087]STFR	2	Y	2	1	7	IgG3	0	FALSE	0	0.99	FALSE	1
1112	587.262	7	IgG3		1	EEQYNSTFR	EEQYN[7.1112]STFR	2	Y	2	1	7	IgG3	0	FALSE	0	0.99	FALSE	1
1137	587.262	7	IgG3		1	EEQYNSTFR	EEQYN[7.1137]STFR	2	Y	2	1	7	IgG3	0	FALSE	0	0.99	FALSE	1
1162	587.262	7	IgG3		1	EEQYNSTFR	EEQYN[7.1162]STFR	2	Y	2	1	7	IgG3	0	FALSE	0	0.99	FALSE	1
1187	587.262	7	IgG3		1	EEQYNSTFR	EEQYN[7.1187]STFR	2	Y	2	1	7	IgG3	0	FALSE	0	0.99	FALSE	1
1212	587.262	7	IgG3		1	EEQYNSTFR	EEQYN[7.1212]STFR	2	Y	2	1	7	IgG3	0	FALSE	0	0.99	FALSE	1
1237	587.262	7	IgG3		1	EEQYNSTFR	EEQYN[7.1237]STFR	2	Y	2	1	7	IgG3	0	FALSE	0	0.99	FALSE	1
412.5	1173.52	8	IgG3		1	EEQYNSTFR	EEQYN[8.412]STFR	2	Y	1	1	8	IgG3	0	FALSE	0	0.99	FALSE	1
437	1173.52	8	IgG3		1	EEQYNSTFR	EEQYN[8.437]STFR	2	Y	1	1	8	IgG3	0	FALSE	0	0.99	FALSE	1
462	1173.52	8	IgG3		1	EEQYNSTFR	EEQYN[8.462]STFR	2	Y	1	1	8	IgG3	0	FALSE	0	0.99	FALSE	1
487	1173.52	8	IgG3		1	EEQYNSTFR	EEQYN[8.487]STFR	2	Y	1	1	8	IgG3	0	FALSE	0	0.99	FALSE	1
512	1173.52	8	IgG3		1	EEQYNSTFR	EEQYN[8.512]STFR	2	Y	1	1	8	IgG3	0	FALSE	0	0.99	FALSE	1
537	1173.52	8	IgG3		1	EEQYNSTFR	EEQYN[8.537]STFR	2	Y	1	1	8	IgG3	0	FALSE	0	0.99	FALSE	1
562	1173.52	8	IgG3		1	EEQYNSTFR	EEQYN[8.562]STFR	2	Y	1	1	8	IgG3	0	FALSE	0	0.99	FALSE	1
587	1173.52	8	IgG3		1	EEQYNSTFR	EEQYN[8.587]STFR	2	Y	1	1	8	IgG3	0	FALSE	0	0.99	FALSE	1
612	1173.52	8	IgG3		1	EEQYNSTFR	EEQYN[8.612]STFR	2	Y	1	1	8	IgG3	0	FALSE	0	0.99	FALSE	1
637	1173.52	8	IgG3		1	EEQYNSTFR	EEQYN[8.637]STFR	2	Y	1	1	8	IgG3	0	FALSE	0	0.99	FALSE	1
662	1173.52	8	IgG3		1	EEQYNSTFR	EEQYN[8.662]STFR	2	Y	1	1	8	IgG3	0	FALSE	0	0.99	FALSE	1
687	1173.52	8	IgG3		1	EEQYNSTFR	EEQYN[8.687]STFR	2	Y	1	1	8	IgG3	0	FALSE	0	0.99	FALSE	1
712	1173.52	8	IgG3		1	EEQYNSTFR	EEQYN[8.712]STFR	2	Y	1	1	8	IgG3	0	FALSE	0	0.99	FALSE	1
737	1173.52	8	IgG3		1	EEQYNSTFR	EEQYN[8.737]STFR	2	Y	1	1	8	IgG3	0	FALSE	0	0.99	FALSE	1
762	1173.52	8	IgG3		1	EEQYNSTFR	EEQYN[8.762]STFR	2	Y	1	1	8	IgG3	0	FALSE	0	0.99	FALSE	1
787	1173.52	8	IgG3		1	EEQYNSTFR	EEQYN[8.787]STFR	2	Y	1	1	8	IgG3	0	FALSE	0	0.99	FALSE	1
812	1173.52	8	IgG3		1	EEQYNSTFR	EEQYN[8.812]STFR	2	Y	1	1	8	IgG3	0	FALSE	0	0.99	FALSE	1
837	1173.52	8	IgG3		1	EEQYNSTFR	EEQYN[8.837]STFR	2	Y	1	1	8	IgG3	0	FALSE	0	0.99	FALSE	1
862	1173.52	8	IgG3		1	EEQYNSTFR	EEQYN[8.862]STFR	2	Y	1	1	8	IgG3	0	FALSE	0	0.99	FALSE	1
887	1173.52	8	IgG3		1	EEQYNSTFR	EEQYN[8.887]STFR	2	Y	1	1	8	IgG3	0	FALSE	0	0.99	FALSE	1
912	1173.52	8	IgG3		1	EEQYNSTFR	EEQYN[8.912]STFR	2	Y	1	1	8	IgG3	0	FALSE	0	0.99	FALSE	1
937	1173.52	8	IgG3		1	EEQYNSTFR	EEQYN[8.937]STFR	2	Y	1	1	8	IgG3	0	FALSE	0	0.99	FALSE	1
962	1173.52	8	IgG3		1	EEQYNSTFR	EEQYN[8.962]STFR	2	Y	1	1	8	IgG3	0	FALSE	0	0.99	FALSE	1
987	1173.52	8	IgG3		1	EEQYNSTFR	EEQYN[8.987]STFR	2	Y	1	1	8	IgG3	0	FALSE	0	0.99	FALSE	1
1012	1173.52	8	IgG3		1	EEQYNSTFR	EEQYN[8.1012]STFR	2	Y	1	1	8	IgG3	0	FALSE	0	0.99	FALSE	1
1037	1173.52	8	IgG3		1	EEQYNSTFR	EEQYN[8.1037]STFR	2	Y	1	1	8	IgG3	0	FALSE	0	0.99	FALSE	1
1062	1173.52	8	IgG3		1	EEQYNSTFR	EEQYN[8.1062]STFR	2	Y	1	1	8	IgG3	0	FALSE	0	0.99	FALSE	1
1087	1173.52	8	IgG3		1	EEQYNSTFR	EEQYN[8.1087]STFR	2	Y	1	1	8	IgG3	0	FALSE	0	0.99	FALSE	1
1112	1173.52	8	IgG3		1	EEQYNSTFR	EEQYN[8.1112]STFR	2	Y	1	1	8	IgG3	0	FALSE	0	0.99	FALSE	1
1137	1173.52	8	IgG3		1	EEQYNSTFR	EEQYN[8.1137]STFR	2	Y	1	1	8	IgG3	0	FALSE	0	0.99	FALSE	1
1162	1173.52	8	IgG3		1	EEQYNSTFR	EEQYN[8.1162]STFR	2	Y	1	1	8	IgG3	0	FALSE	0	0.99	FALSE	1
1187	1173.52	8	IgG3		1	EEQYNSTFR	EEQYN[8.1187]STFR	2	Y	1	1	8	IgG3	0	FALSE	0	0.99	FALSE	1
1212	1173.52	8	IgG3		1	EEQYNSTFR	EEQYN[8.1212]STFR	2	Y	1	1	8	IgG3	0	FALSE	0	0.99	FALSE	1
1237	1173.52	8	IgG3		1	EEQYNSTFR	EEQYN[8.1237]STFR	2	Y	1	1	8	IgG3	0	FALSE	0	0.99	FALSE	1
412.5	587.262	8	IgG3		1	EEQYNSTFR	EEQYN[8.412]STFR	2	Y	2	1	8	IgG3	0	FALSE	0	0.99	FALSE	1
437	587.262	8	IgG3		1	EEQYNSTFR	EEQYN[8.437]STFR	2	Y	2	1	8	IgG3	0	FALSE	0	0.99	FALSE	1
462	587.262	8	IgG3		1	EEQYNSTFR	EEQYN[8.462]STFR	2	Y	2	1	8	IgG3	0	FALSE	0	0.99	FALSE	1
487	587.262	8	IgG3		1	EEQYNSTFR	EEQYN[8.487]STFR	2	Y	2	1	8	IgG3	0	FALSE	0	0.99	FALSE	1
512	587.262	8	IgG3		1	EEQYNSTFR	EEQYN[8.512]STFR	2	Y	2	1	8	IgG3	0	FALSE	0	0.99	FALSE	1
537	587.262	8	IgG3		1	EEQYNSTFR	EEQYN[8.537]STFR	2	Y	2	1	8	IgG3	0	FALSE	0	0.99	FALSE	1
562	587.262	8	IgG3		1	EEQYNSTFR	EEQYN[8.562]STFR	2	Y	2	1	8	IgG3	0	FALSE	0	0.99	FALSE	1
587	587.262	8	IgG3		1	EEQYNSTFR	EEQYN[8.587]STFR	2	Y	2	1	8	IgG3	0	FALSE	0	0.99	FALSE	1
612	587.262	8	IgG3		1	EEQYNSTFR	EEQYN[8.612]STFR	2	Y	2	1	8	IgG3	0	FALSE	0	0.99	FALSE	1
637	587.262	8	IgG3		1	EEQYNSTFR	EEQYN[8.637]STFR	2	Y	2	1	8	IgG3	0	FALSE	0	0.99	FALSE	1
662	587.262	8	IgG3		1	EEQYNSTFR	EEQYN[8.662]STFR	2	Y	2	1	8	IgG3	0	FALSE	0	0.99	FALSE	1
687	587.262	8	IgG3		1	EEQYNSTFR	EEQYN[8.687]STFR	2	Y	2	1	8	IgG3	0	FALSE	0	0.99	FALSE	1
712	587.262	8	IgG3		1	EEQYNSTFR	EEQYN[8.712]STFR	2	Y	2	1	8	IgG3	0	FALSE	0	0.99	FALSE	1
737	587.262	8	IgG3		1	EEQYNSTFR	EEQYN[8.737]STFR	2	Y	2	1	8	IgG3	0	FALSE	0	0.99	FALSE	1
762	587.262	8	IgG3		1	EEQYNSTFR	EEQYN[8.762]STFR	2	Y	2	1	8	IgG3	0	FALSE	0	0.99	FALSE	1
787	587.262	8	IgG3		1	EEQYNSTFR	EEQYN[8.787]STFR	2	Y	2	1	8	IgG3	0	FALSE	0	0.99	FALSE	1
812	587.262	8	IgG3		1	EEQYNSTFR	EEQYN[8.812]STFR	2	Y	2	1	8	IgG3	0	FALSE	0	0.99	FALSE	1
837	587.262	8	IgG3		1	EEQYNSTFR	EEQYN[8.837]STFR	2	Y	2	1	8	IgG3	0	FALSE	0	0.99	FALSE	1
862	587.262	8	IgG3		1	EEQYNSTFR	EEQYN[8.862]STFR	2	Y	2	1	8	IgG3	0	FALSE	0	0.99	FALSE	1
887	587.262	8	IgG3		1	EEQYNSTFR	EEQYN[8.887]STFR	2	Y	2	1	8	IgG3	0	FALSE	0	0.99	FALSE	1
912	587.262	8	IgG3		1	EEQYNSTFR	EEQYN[8.912]STFR	2	Y	2	1	8	IgG3	0	FALSE	0	0.99	FALSE	1
937	587.262	8	IgG3		1	EEQYNSTFR	EEQYN[8.937]STFR	2	Y	2	1	8	IgG3	0	FALSE	0	0.99	FALSE	1
962	587.262	8	IgG3		1	EEQYNSTFR	EEQYN[8.962]STFR	2	Y	2	1	8	IgG3	0	FALSE	0	0.99	FALSE	1
987	587.262	8	IgG3		1	EEQYNSTFR	EEQYN[8.987]STFR	2	Y	2	1	8	IgG3	0	FALSE	0	0.99	FALSE	1
1012	587.262	8	IgG3		1	EEQYNSTFR	EEQYN[8.1012]STFR	2	Y	2	1	8	IgG3	0	FALSE	0	0.99	FALSE	1
1037	587.262	8	IgG3		1	EEQYNSTFR	EEQYN[8.1037]STFR	2	Y	2	1	8	IgG3	0	FALSE	0	0.99	FALSE	1
1062	587.262	8	IgG3		1	EEQYNSTFR	EEQYN[8.1062]STFR	2	Y	2	1	8	IgG3	0	FALSE	0	0.99	FALSE	1
1087	587.262	8	IgG3		1	EEQYNSTFR	EEQYN[8.1087]STFR	2	Y	2	1	8	IgG3	0	FALSE	0	0.99	FALSE	1
1112	587.262	8	IgG3		1	EEQYNSTFR	EEQYN[8.1112]STFR	2	Y	2	1	8	IgG3	0	FALSE	0	0.99	FALSE	1
1137	587.262	8	IgG3		1	EEQYNSTFR	EEQYN[8.1137]STFR	2	Y	2	1	8	IgG3	0	FALSE	0	0.99	FALSE	1
1162	587.262	8	IgG3		1	EEQYNSTFR	EEQYN[8.1162]STFR	2	Y	2	1	8	IgG3	0	FALSE	0	0.99	FALSE	1
1187	587.262	8	IgG3		1	EEQYNSTFR	EEQYN[8.1187]STFR	2	Y	2	1	8	IgG3	0	FALSE	0	0.99	FALSE	1
1212	587.262	8	IgG3		1	EEQYNSTFR	EEQYN[8.1212]STFR	2	Y	2	1	8	IgG3	0	FALSE	0	0.99	FALSE	1
1237	587.262	8	IgG3		1	EEQYNSTFR	EEQYN[8.1237]STFR	2	Y	2	1	8	IgG3	0	FALSE	0	0.99	FALSE	1
412.5	1173.52	9	IgG3		1	EEQYNSTFR	EEQYN[9.412]STFR	2	Y	1	1	9	IgG3	0	FALSE	0	0.99	FALSE	1
437	1173.52	9	IgG3		1	EEQYNSTFR	EEQYN[9.437]STFR	2	Y	1	1	9	IgG3	0	FALSE	0	0.99	FALSE	1
462	1173.52	9	IgG3		1	EEQYNSTFR	EEQYN[9.462]STFR	2	Y	1	1	9	IgG3	0	FALSE	0	0.99	FALSE	1
487	1173.52	9	IgG3		1	EEQYNSTFR	EEQYN[9.487]STFR	2	Y	1	1	9	IgG3	0	FALSE	0	0.99	FALSE	1
512	1173.52	9	IgG3		1	EEQYNSTFR	EEQYN[9.512]STFR	2	Y	1	1	9	IgG3	0	FALSE	0	0.99	FALSE	1
537	1173.52	9	IgG3		1	EEQYNSTFR	EEQYN[9.537]STFR	2	Y	1	1	9	IgG3	0	FALSE	0	0.99	FALSE	1
562	1173.52	9	IgG3		1	EEQYNSTFR	EEQYN[9.562]STFR	2	Y	1	1	9	IgG3	0	FALSE	0	0.99	FALSE	1
587	1173.52	9	IgG3		1	EEQYNSTFR	EEQYN[9.587]STFR	2	Y	1	1	9	IgG3	0	FALSE	0	0.99	FALSE	1
612	1173.52	9	IgG3		1	EEQYNSTFR	EEQYN[9.612]STFR	2	Y	1	1	9	IgG3	0	FALSE	0	0.99	FALSE	1
637	1173.52	9	IgG3		1	EEQYNSTFR	EEQYN[9.637]STFR	2	Y	1	1	9	IgG3	0	FALSE	0	0.99	FALSE	1
662	1173.52	9	IgG3		1	EEQYNSTFR	EEQYN[9.662]STFR	2	Y	1	1	9	IgG3	0	FALSE	0	0.99	FALSE	1
687	1173.52	9	IgG3		1	EEQYNSTFR	EEQYN[9.687]STFR	2	Y	1	1	9	IgG3	0	FALSE	0	0.99	FALSE	1
712	1173.52	9	IgG3		1	EEQYNSTFR	EEQYN[9.712]STFR	2	Y	1	1	9	IgG3	0	FALSE	0	0.99	FALSE	1
737	1173.52	9	IgG3		1	EEQYNSTFR	EEQYN[9.737]STFR	2	Y	1	1	9	IgG3	0	FALSE	0	0.99	FALSE	1
762	1173.52	9	IgG3		1	EEQYNSTFR	EEQYN[9.762]STFR	2	Y	1	1	9	IgG3	0	FALSE	0	0.99	FALSE	1
787	1173.52	9	IgG3		1	EEQYNSTFR	EEQYN[9.787]STFR	2	Y	1	1	9	IgG3	0	FALSE	0	0.99	FALSE	1
812	1173.52	9	IgG3		1	EEQYNSTFR	EEQYN[9.812]STFR	2	Y	1	1	9	IgG3	0	FALSE	0	0.99	FALSE	1
837	1173.52	9	IgG3		1	EEQYNSTFR	EEQYN[9.837]STFR	2	Y	1	1	9	IgG3	0	FALSE	0	0.99	FALSE	1
862	1173.52	9	IgG3		1	EEQYNSTFR	EEQYN[9.862]STFR	2	Y	1	1	9	IgG3	0	FALSE	0	0.99	FALSE	1
887	1173.52	9	IgG3		1	EEQYNSTFR	EEQYN[9.887]STFR	2	Y	1	1	9	IgG3	0	FALSE	0	0.99	FALSE	1
912	1173.52	9	IgG3		1	EEQYNSTFR	EEQYN[9.912]STFR	2	Y	1	1	9	IgG3	0	FALSE	0	0.99	FALSE	1
937	1173.52	9	IgG3		1	EEQYNSTFR	EEQYN[9.937]STFR	2	Y	1	1	9	IgG3	0	FALSE	0	0.99	FALSE	1
962	1173.52	9	IgG3		1	EEQYNSTFR	EEQYN[9.962]STFR	2	Y	1	1	9	IgG3	0	FALSE	0	0.99	FALSE	1
987	1173.52	9	IgG3		1	EEQYNSTFR	EEQYN[9.987]STFR	2	Y	1	1	9	IgG3	0	FALSE	0	0.99	FALSE	1
1012	1173.52	9	IgG3		1	EEQYNSTFR	EEQYN[9.1012]STFR	2	Y	1	1	9	IgG3	0	FALSE	0	0.99	FALSE	1
1037	1173.52	9	IgG3		1	EEQYNSTFR	EEQYN[9.1037]STFR	2	Y	1	1	9	IgG3	0	FALSE	0	0.99	FALSE	1
1062	1173.52	9	IgG3		1	EEQYNSTFR	EEQYN[9.1062]STFR	2	Y	1	1	9	IgG3	0	FALSE	0	0.99	FALSE	1
1087	1173.52	9	IgG3		1	EEQYNSTFR	EEQYN[9.1087]STFR	2	Y	1	1	9	IgG3	0	FALSE	0	0.99	FALSE	1
1112	1173.52	9	IgG3		1	EEQYNSTFR	EEQYN[9.1112]STFR	2	Y	1	1	9	IgG3	0	FALSE	0	0.99	FALSE	1
1137	1173.52	9	IgG3		1	EEQYNSTFR	EEQYN[9.1137]STFR	2	Y	1	1	9	IgG3	0	FALSE	0	0.99	FALSE	1
1162	1173.52	9	IgG3		1	EEQYNSTFR	EEQYN[9.1162]STFR	2	Y	1	1	9	IgG3	0	FALSE	0	0.99	FALSE	1
1187	1173.52	9	IgG3		1	EEQYNSTFR	EEQYN[9.1187]STFR	2	Y	1	1	9	IgG3	0	FALSE	0	0.99	FALSE	1
1212	1173.52	9	IgG3		1	EEQYNSTFR	EEQYN[9.1212]STFR	2	Y	1	1	9	IgG3	0	FALSE	0	0.99	FALSE	1
1237	1173.52	9	IgG3		1	EEQYNSTFR	EEQYN[9.1237]STFR	2	Y	1	1	9	IgG3	0	FALSE	0	0.99	FALSE	1
412.5	587.262	9	IgG3		1	EEQYNSTFR	EEQYN[9.412]STFR	2	Y	2	1	9	IgG3	0	FALSE	0	0.99	FALSE	1
437	587.262	9	IgG3		1	EEQYNSTFR	EEQYN[9.437]STFR	2	Y	2	1	9	IgG3	0	FALSE	0	0.99	FALSE	1
462	587.262	9	IgG3		1	EEQYNSTFR	EEQYN[9.462]STFR	2	Y	2	1	9	IgG3	0	FALSE	0	0.99	FALSE	1
487	587.262	9	IgG3		1	EEQYNSTFR	EEQYN[9.487]STFR	2	Y	2	1	9	IgG3	0	FALSE	0	0.99	FALSE	1
512	587.262	9	IgG3		1	EEQYNSTFR	EEQYN[9.512]STFR	2	Y	2	1	9	IgG3	0	FALSE	0	0.99	FALSE	1
537	587.262	9	IgG3		1	EEQYNSTFR	EEQYN[9.537]STFR	2	Y	2	1	9	IgG3	0	FALSE	0	0.99	FALSE	1
562	587.262	9	IgG3		1	EEQYNSTFR	EEQYN[9.562]STFR	2	Y	2	1	9	IgG3	0	FALSE	0	0.99	FALSE	1
587	587.262	9	IgG3		1	EEQYNSTFR	EEQYN[9.587]STFR	2	Y	2	1	9	IgG3	0	FALSE	0	0.99	FALSE	1
612	587.262	9	IgG3		1	EEQYNSTFR	EEQYN[9.612]STFR	2	Y	2	1	9	IgG3	0	FALSE	0	0.99	FALSE	1
637	587.262	9	IgG3		1	EEQYNSTFR	EEQYN[9.637]STFR	2	Y	2	1	9	IgG3	0	FALSE	0	0.99	FALSE	1
662	587.262	9	IgG3		1	EEQYNSTFR	EEQYN[9.662]STFR	2	Y	2	1	9	IgG3	0	FALSE	0	0.99	FALSE	1
687	587.262	9	IgG3		1	EEQYNSTFR	EEQYN[9.687]STFR	2	Y	2	1	9	IgG3	0	FALSE	0	0.99	FALSE	1
712	587.262	9	IgG3		1	EEQYNSTFR	EEQYN[9.712]STFR	2	Y	2	1	9	IgG3	0	FALSE	0	0.99	FALSE	1
737	587.262	9	IgG3		1	EEQYNSTFR	EEQYN[9.737]STFR	2	Y	2	1	9	IgG3	0	FALSE	0	0.99	FALSE	1
762	587.262	9	IgG3		1	EEQYNSTFR	EEQYN[9.762]STFR	2	Y	2	1	9	IgG3	0	FALSE	0	0.99	FALSE	1
787	587.262	9	IgG3		1	EEQYNSTFR	EEQYN[9.787]STFR	2	Y	2	1	9	IgG3	0	FALSE	0	0.99	FALSE	1
812	587.262	9	IgG3		1	EEQYNSTFR	EEQYN[9.812]STFR	2	Y	2	1	9	IgG3	0	FALSE	0	0.99	FALSE	1
837	587.262	9	IgG3		1	EEQYNSTFR	EEQYN[9.837]STFR	2	Y	2	1	9	IgG3	0	FALSE	0	0.99	FALSE	1
862	587.262	9	IgG3		1	EEQYNSTFR	EEQYN[9.862]STFR	2	Y	2	1	9	IgG3	0	FALSE	0	0.99	FALSE	1
887	587.262	9	IgG3		1	EEQYNSTFR	EEQYN[9.887]STFR	2	Y	2	1	9	IgG3	0	FALSE	0	0.99	FALSE	1
912	587.262	9	IgG3		1	EEQYNSTFR	EEQYN[9.912]STFR	2	Y	2	1	9	IgG3	0	FALSE	0	0.99	FALSE	1
937	587.262	9	IgG3		1	EEQYNSTFR	EEQYN[9.937]STFR	2	Y	2	1	9	IgG3	0	FALSE	0	0.99	FALSE	1
962	587.262	9	IgG3		1	EEQYNSTFR	EEQYN[9.962]STFR	2	Y	2	1	9	IgG3	0	FALSE	0	0.99	FALSE	1
987	587.262	9	IgG3		1	EEQYNSTFR	EEQYN[9.987]STFR	2	Y	2	1	9	IgG3	0	FALSE	0	0.99	FALSE	1
1012	587.262	9	IgG3		1	EEQYNSTFR	EEQYN[9.1012]STFR	2	Y	2	1	9	IgG3	0	FALSE	0	0.99	FALSE	1
1037	587.262	9	IgG3		1	EEQYNSTFR	EEQYN[9.1037]STFR	2	Y	2	1	9	IgG3	0	FALSE	0	0.99	FALSE	1
1062	587.262	9	IgG3		1	EEQYNSTFR	EEQYN[9.1062]STFR	2	Y	2	1	9	IgG3	0	FALSE	0	0.99	FALSE	1
1087	587.262	9	IgG3		1	EEQYNSTFR	EEQYN[9.1087]STFR	2	Y	2	1	9	IgG3	0	FALSE	0	0.99	FALSE	1
1112	587.262	9	IgG3		1	EEQYNSTFR	EEQYN[9.1112]STFR	2	Y	2	1	9	IgG3	0	FALSE	0	0.99	FALSE	1
1137	587.262	9	IgG3		1	EEQYNSTFR	EEQYN[9.1137]STFR	2	Y	2	1	9	IgG3	0	FALSE	0	0.99	FALSE	1
1162	587.262	9	IgG3		1	EEQYNSTFR	EEQYN[9.1162]STFR	2	Y	2	1	9	IgG3	0	FALSE	0	0.99	FALSE	1
1187	587.262	9	IgG3		1	EEQYNSTFR	EEQYN[9.1187]STFR	2	Y	2	1	9	IgG3	0	FALSE	0	0.99	FALSE	1
1212	587.262	9	IgG3		1	EEQYNSTFR	EEQYN[9.1212]STFR	2	Y	2	1	9	IgG3	0	FALSE	0	0.99	FALSE	1
1237	587.262	9	IgG3		1	EEQYNSTFR	EEQYN[9.1237]STFR	2	Y	2	1	9	IgG3	0	FALSE	0	0.99	FALSE	1
412.5	1173.52	10	IgG3		1	EEQYNSTFR	EEQYN[10.412]STFR	2	Y	1	1	10	IgG3	0	FALSE	0	0.99	FALSE	1
437	1173.52	10	IgG3		1	EEQYNSTFR	EEQYN[10.437]STFR	2	Y	1	1	10	IgG3	0	FALSE	0	0.99	FALSE	1
462	1173.52	10	IgG3		1	EEQYNSTFR	EEQYN[10.462]STFR	2	Y	1	1	10	IgG3	0	FALSE	0	0.99	FALSE	1
487	1173.52	10	IgG3		1	EEQYNSTFR	EEQYN[10.487]STFR	2	Y	1	1	10	IgG3	0	FALSE	0	0.99	FALSE	1
512	1173.52	10	IgG3		1	EEQYNSTFR	EEQYN[10.512]STFR	2	Y	1	1	10	IgG3	0	FALSE	0	0.99	FALSE	1
537	1173.52	10	IgG3		1	EEQYNSTFR	EEQYN[10.537]STFR	2	Y	1	1	10	IgG3	0	FALSE	0	0.99	FALSE	1
562	1173.52	10	IgG3		1	EEQYNSTFR	EEQYN[10.562]STFR	2	Y	1	1	10	IgG3	0	FALSE	0	0.99	FALSE	1
587	1173.52	10	IgG3		1	EEQYNSTFR	EEQYN[10.587]STFR	2	Y	1	1	10	IgG3	0	FALSE	0	0.99	FALSE	1
612	1173.52	10	IgG3		1	EEQYNSTFR	EEQYN[10.612]STFR	2	Y	1	1	10	IgG3	0	FALSE	0	0.99	FALSE	1
637	1173.52	10	IgG3		1	EEQYNSTFR	EEQYN[10.637]STFR	2	Y	1	1	10	IgG3	0	FALSE	0	0.99	FALSE	1
662	1173.52	10	IgG3		1	EEQYNSTFR	EEQYN[10.662]STFR	2	Y	1	1	10	IgG3	0	FALSE	0	0.99	FALSE	1
687	1173.52	10	IgG3		1	EEQYNSTFR	EEQYN[10.687]STFR	2	Y	1	1	10	IgG3	0	FALSE	0	0.99	FALSE	1
712	1173.52	10	IgG3		1	EEQYNSTFR	EEQYN[10.712]STFR	2	Y	1	1	10	IgG3	0	FALSE	0	0.99	FALSE	1
737	1173.52	10	IgG3		1	EEQYNSTFR	EEQYN[10.737]STFR	2	Y	1	1	10	IgG3	0	FALSE	0	0.99	FALSE	1
762	1173.52	10	IgG3		1	EEQYNSTFR	EEQYN[10.762]STFR	2	Y	1	1	10	IgG3	0	FALSE	0	0.99	FALSE	1
787	1173.52	10	IgG3		1	EEQYNSTFR	EEQYN[10.787]STFR	2	Y	1	1	10	IgG3	0	FALSE	0	0.99	FALSE	1
812	1173.52	10	IgG3		1	EEQYNSTFR	EEQYN[10.812]STFR	2	Y	1	1	10	IgG3	0	FALSE	0	0.99	FALSE	1
837	1173.52	10	IgG3		1	EEQYNSTFR	EEQYN[10.837]STFR	2	Y	1	1	10	IgG3	0	FALSE	0	0.99	FALSE	1
862	1173.52	10	IgG3		1	EEQYNSTFR	EEQYN[10.862]STFR	2	Y	1	1	10	IgG3	0	FALSE	0	0.99	FALSE	1
887	1173.52	10	IgG3		1	EEQYNSTFR	EEQYN[10.887]STFR	2	Y	1	1	10	IgG3	0	FALSE	0	0.99	FALSE	1
912	1173.52	10	IgG3		1	EEQYNSTFR	EEQYN[10.912]STFR	2	Y	1	1	10	IgG3	0	FALSE	0	0.99	FALSE	1
937	1173.52	10	IgG3		1	EEQYNSTFR	EEQYN[10.937]STFR	2	Y	1	1	10	IgG3	0	FALSE	0	0.99	FALSE	1
962	1173.52	10	IgG3		1	EEQYNSTFR	EEQYN[10.962]STFR	2	Y	1	1	10	IgG3	0	FALSE	0	0.99	FALSE	1
987	1173.52	10	IgG3		1	EEQYNSTFR	EEQYN[10.987]STFR	2	Y	1	1	10	IgG3	0	FALSE	0	0.99	FALSE	1
1012	1173.52	10	IgG3		1	EEQYNSTFR	EEQYN[10.1012]STFR	2	Y	1	1	10	IgG3	0	FALSE	0	0.99	FALSE	1
1037	1173.52	10	IgG3		1	EEQYNSTFR	EEQYN[10.1037]STFR	2	Y	1	1	10	IgG3	0	FALSE	0	0.99	FALSE	1
1062	1173.52	10	IgG3		1	EEQYNSTFR	EEQYN[10.1062]STFR	2	Y	1	1	10	IgG3	0	FALSE	0	0.99	FALSE	1
1087	1173.52	10	IgG3		1	EEQYNSTFR	EEQYN[10.1087]STFR	2	Y	1	1	10	IgG3	0	FALSE	0	0.99	FALSE	1
1112	1173.52	10	IgG3		1	EEQYNSTFR	EEQYN[10.1112]STFR	2	Y	1	1	10	IgG3	0	FALSE	0	0.99	FALSE	1
1137	1173.52	10	IgG3		1	EEQYNSTFR	EEQYN[10.1137]STFR	2	Y	1	1	10	IgG3	0	FALSE	0	0.99	FALSE	1
1162	1173.52	10	IgG3		1	EEQYNSTFR	EEQYN[10.1162]STFR	2	Y	1	1	10	IgG3	0	FALSE	0	0.99	FALSE	1
1187	1173.52	10	IgG3		1	EEQYNSTFR	EEQYN[10.1187]STFR	2	Y	1	1	10	IgG3	0	FALSE	0	0.99	FALSE	1
1212	1173.52	10	IgG3		1	EEQYNSTFR	EEQYN[10.1212]STFR	2	Y	1	1	10	IgG3	0	FALSE	0	0.99	FALSE	1
1237	1173.52	10	IgG3		1	EEQYNSTFR	EEQYN[10.1237]STFR	2	Y	1	1	10	IgG3	0	FALSE	0	0.99	FALSE	1
412.5	587.262	10	IgG3		1	EEQYNSTFR	EEQYN[10.412]STFR	2	Y	2	1	10	IgG3	0	FALSE	0	0.99	FALSE	1
437	587.262	10	IgG3		1	EEQYNSTFR	EEQYN[10.437]STFR	2	Y	2	1	10	IgG3	0	FALSE	0	0.99	FALSE	1
462	587.262	10	IgG3		1	EEQYNSTFR	EEQYN[10.462]STFR	2	Y	2	1	10	IgG3	0	FALSE	0	0.99	FALSE	1
487	587.262	10	IgG3		1	EEQYNSTFR	EEQYN[10.487]STFR	2	Y	2	1	10	IgG3	0	FALSE	0	0.99	FALSE	1
512	587.262	10	IgG3		1	EEQYNSTFR	EEQYN[10.512]STFR	2	Y	2	1	10	IgG3	0	FALSE	0	0.99	FALSE	1
537	587.262	10	IgG3		1	EEQYNSTFR	EEQYN[10.537]STFR	2	Y	2	1	10	IgG3	0	FALSE	0	0.99	FALSE	1
562	587.262	10	IgG3		1	EEQYNSTFR	EEQYN[10.562]STFR	2	Y	2	1	10	IgG3	0	FALSE	0	0.99	FALSE	1
587	587.262	10	IgG3		1	EEQYNSTFR	EEQYN[10.587]STFR	2	Y	2	1	10	IgG3	0	FALSE	0	0.99	FALSE	1
612	587.262	10	IgG3		1	EEQYNSTFR	EEQYN[10.612]STFR	2	Y	2	1	10	IgG3	0	FALSE	0	0.99	FALSE	1
637	587.262	10	IgG3		1	EEQYNSTFR	EEQYN[10.637]STFR	2	Y	2	1	10	IgG3	0	FALSE	0	0.99	FALSE	1
662	587.262	10	IgG3		1	EEQYNSTFR	EEQYN[10.662]STFR	2	Y	2	1	10	IgG3	0	FALSE	0	0.99	FALSE	1
687	587.262	10	IgG3		1	EEQYNSTFR	EEQYN[10.687]STFR	2	Y	2	1	10	IgG3	0	FALSE	0	0.99	FALSE	1
712	587.262	10	IgG3		1	EEQYNSTFR	EEQYN[10.712]STFR	2	Y	2	1	10	IgG3	0	FALSE	0	0.99	FALSE	1
737	587.262	10	IgG3		1	EEQYNSTFR	EEQYN[10.737]STFR	2	Y	2	1	10	IgG3	0	FALSE	0	0.99	FALSE	1
762	587.262	10	IgG3		1	EEQYNSTFR	EEQYN[10.762]STFR	2	Y	2	1	10	IgG3	0	FALSE	0	0.99	FALSE	1
787	587.262	10	IgG3		1	EEQYNSTFR	EEQYN[10.787]STFR	2	Y	2	1	10	IgG3	0	FALSE	0	0.99	FALSE	1
812	587.262	10	IgG3		1	EEQYNSTFR	EEQYN[10.812]STFR	2	Y	2	1	10	IgG3	0	FALSE	0	0.99	FALSE	1
837	587.262	10	IgG3		1	EEQYNSTFR	EEQYN[10.837]STFR	2	Y	2	1	10	IgG3	0	FALSE	0	0.99	FALSE	1
862	587.262	10	IgG3		1	EEQYNSTFR	EEQYN[10.862]STFR	2	Y	2	1	10	IgG3	0	FALSE	0	0.99	FALSE	1
887	587.262	10	IgG3		1	EEQYNSTFR	EEQYN[10.887]STFR	2	Y	2	1	10	IgG3	0	FALSE	0	0.99	FALSE	1
912	587.262	10	IgG3		1	EEQYNSTFR	EEQYN[10.912]STFR	2	Y	2	1	10	IgG3	0	FALSE	0	0.99	FALSE	1
937	587.262	10	IgG3		1	EEQYNSTFR	EEQYN[10.937]STFR	2	Y	2	1	10	IgG3	0	FALSE	0	0.99	FALSE	1
962	587.262	10	IgG3		1	EEQYNSTFR	EEQYN[10.962]STFR	2	Y	2	1	10	IgG3	0	FALSE	0	0.99	FALSE	1
987	587.262	10	IgG3		1	EEQYNSTFR	EEQYN[10.987]STFR	2	Y	2	1	10	IgG3	0	FALSE	0	0.99	FALSE	1
1012	587.262	10	IgG3		1	EEQYNSTFR	EEQYN[10.1012]STFR	2	Y	2	1	10	IgG3	0	FALSE	0	0.99	FALSE	1
1037	587.262	10	IgG3		1	EEQYNSTFR	EEQYN[10.1037]STFR	2	Y	2	1	10	IgG3	0	FALSE	0	0.99	FALSE	1
1062	587.262	10	IgG3		1	EEQYNSTFR	EEQYN[10.1062]STFR	2	Y	2	1	10	IgG3	0	FALSE	0	0.99	FALSE	1
1087	587.262	10	IgG3		1	EEQYNSTFR	EEQYN[10.1087]STFR	2	Y	2	1	10	IgG3	0	FALSE	0	0.99	FALSE	1
1112	587.262	10	IgG3		1	EEQYNSTFR	EEQYN[10.1112]STFR	2	Y	2	1	10	IgG3	0	FALSE	0	0.99	FALSE	1
1137	587.262	10	IgG3		1	EEQYNSTFR	EEQYN[10.1137]STFR	2	Y	2	1	10	IgG3	0	FALSE	0	0.99	FALSE	1
1162	587.262	10	IgG3		1	EEQYNSTFR	EEQYN[10.1162]STFR	2	Y	2	1	10	IgG3	0	FALSE	0	0.99	FALSE	1
1187	587.262	10	IgG3		1	EEQYNSTFR	EEQYN[10.1187]STFR	2	Y	2	1	10	IgG3	0	FALSE	0	0.99	FALSE	1
1212	587.262	10	IgG3		1	EEQYNSTFR	EEQYN[10.1212]STFR	2	Y	2	1	10	IgG3	0	FALSE	0	0.99	FALSE	1
1237	587.262	10	IgG3		1	EEQYNSTFR	EEQYN[10.1237]STFR	2	Y	2	1	10	IgG3	0	FALSE	0	0.99	FALSE	1
412.5	1173.52	11	IgG3		1	EEQYNSTFR	EEQYN[11.412]STFR	2	Y	1	1	11	IgG3	0	FALSE	0	0.99	FALSE	1
437	1173.52	11	IgG3		1	EEQYNSTFR	EEQYN[11.437]STFR	2	Y	1	1	11	IgG3	0	FALSE	0	0.99	FALSE	1
462	1173.52	11	IgG3		1	EEQYNSTFR	EEQYN[11.462]STFR	2	Y	1	1	11	IgG3	0	FALSE	0	0.99	FALSE	1
487	1173.52	11	IgG3		1	EEQYNSTFR	EEQYN[11.487]STFR	2	Y	1	1	11	IgG3	0	FALSE	0	0.99	FALSE	1
512	1173.52	11	IgG3		1	EEQYNSTFR	EEQYN[11.512]STFR	2	Y	1	1	11	IgG3	0	FALSE	0	0.99	FALSE	1
537	1173.52	11	IgG3		1	EEQYNSTFR	EEQYN[11.537]STFR	2	Y	1	1	11	IgG3	0	FALSE	0	0.99	FALSE	1
562	1173.52	11	IgG3		1	EEQYNSTFR	EEQYN[11.562]STFR	2	Y	1	1	11	IgG3	0	FALSE	0	0.99	FALSE	1
587	1173.52	11	IgG3		1	EEQYNSTFR	EEQYN[11.587]STFR	2	Y	1	1	11	IgG3	0	FALSE	0	0.99	FALSE	1
612	1173.52	11	IgG3		1	EEQYNSTFR	EEQYN[11.612]STFR	2	Y	1	1	11	IgG3	0	FALSE	0	0.99	FALSE	1
637	1173.52	11	IgG3		1	EEQYNSTFR	EEQYN[11.637]STFR	2	Y	1	1	11	IgG3	0	FALSE	0	0.99	FALSE	1
662	1173.52	11	IgG3		1	EEQYNSTFR	EEQYN[11.662]STFR	2	Y	1	1	11	IgG3	0	FALSE	0	0.99	FALSE	1
687	1173.52	11	IgG3		1	EEQYNSTFR	EEQYN[11.687]STFR	2	Y	1	1	11	IgG3	0	FALSE	0	0.99	FALSE	1
712	1173.52	11	IgG3		1	EEQYNSTFR	EEQYN[11.712]STFR	2	Y	1	1	11	IgG3	0	FALSE	0	0.99	FALSE	1
737	1173.52	11	IgG3		1	EEQYNSTFR	EEQYN[11.737]STFR	2	Y	1	1	11	IgG3	0	FALSE	0	0.99	FALSE	1
762	1173.52	11	IgG3		1	EEQYNSTFR	EEQYN[11.762]STFR	2	Y	1	1	11	IgG3	0	FALSE	0	0.99	FALSE	1
787	1173.52	11	IgG3		1	EEQYNSTFR	EEQYN[11.787]STFR	2	Y	1	1	11	IgG3	0	FALSE	0	0.99	FALSE	1
812	1173.52	11	IgG3		1	EEQYNSTFR	EEQYN[11.812]STFR	2	Y	1	1	11	IgG3	0	FALSE	0	0.99	FALSE	1
837	1173.52	11	IgG3		1	EEQYNSTFR	EEQYN[11.837]STFR	2	Y	1	1	11	IgG3	0	FALSE	0	0.99	FALSE	1
862	1173.52	11	IgG3		1	EEQYNSTFR	EEQYN[11.862]STFR	2	Y	1	1	11	IgG3	0	FALSE	0	0.99	FALSE	1
887	1173.52	11	IgG3		1	EEQYNSTFR	EEQYN[11.887]STFR	2	Y	1	1	11	IgG3	0	FALSE	0	0.99	FALSE	1
912	1173.52	11	IgG3		1	EEQYNSTFR	EEQYN[11.912]STFR	2	Y	1	1	11	IgG3	0	FALSE	0	0.99	FALSE	1
937	1173.52	11	IgG3		1	EEQYNSTFR	EEQYN[11.937]STFR	2	Y	1	1	11	IgG3	0	FALSE	0	0.99	FALSE	1
962	1173.52	11	IgG3		1	EEQYNSTFR	EEQYN[11.962]STFR	2	Y	1	1	11	IgG3	0	FALSE	0	0.99	FALSE	1
987	1173.52	11	IgG3		1	EEQYNSTFR	EEQYN[11.987]STFR	2	Y	1	1	11	IgG3	0	FALSE	0	0.99	FALSE	1
1012	1173.52	11	IgG3		1	EEQYNSTFR	EEQYN[11.1012]STFR	2	Y	1	1	11	IgG3	0	FALSE	0	0.99	FALSE	1
1037	1173.52	11	IgG3		1	EEQYNSTFR	EEQYN[11.1037]STFR	2	Y	1	1	11	IgG3	0	FALSE	0	0.99	FALSE	1
1062	1173.52	11	IgG3		1	EEQYNSTFR	EEQYN[11.1062]STFR	2	Y	1	1	11	IgG3	0	FALSE	0	0.99	FALSE	1
1087	1173.52	11	IgG3		1	EEQYNSTFR	EEQYN[11.1087]STFR	2	Y	1	1	11	IgG3	0	FALSE	0	0.99	FALSE	1
1112	1173.52	11	IgG3		1	EEQYNSTFR	EEQYN[11.1112]STFR	2	Y	1	1	11	IgG3	0	FALSE	0	0.99	FALSE	1
1137	1173.52	11	IgG3		1	EEQYNSTFR	EEQYN[11.1137]STFR	2	Y	1	1	11	IgG3	0	FALSE	0	0.99	FALSE	1
1162	1173.52	11	IgG3		1	EEQYNSTFR	EEQYN[11.1162]STFR	2	Y	1	1	11	IgG3	0	FALSE	0	0.99	FALSE	1
1187	1173.52	11	IgG3		1	EEQYNSTFR	EEQYN[11.1187]STFR	2	Y	1	1	11	IgG3	0	FALSE	0	0.99	FALSE	1
1212	1173.52	11	IgG3		1	EEQYNSTFR	EEQYN[11.1212]STFR	2	Y	1	1	11	IgG3	0	FALSE	0	0.99	FALSE	1
1237	1173.52	11	IgG3		1	EEQYNSTFR	EEQYN[11.1237]STFR	2	Y	1	1	11	IgG3	0	FALSE	0	0.99	FALSE	1
412.5	587.262	11	IgG3		1	EEQYNSTFR	EEQYN[11.412]STFR	2	Y	2	1	11	IgG3	0	FALSE	0	0.99	FALSE	1
437	587.262	11	IgG3		1	EEQYNSTFR	EEQYN[11.437]STFR	2	Y	2	1	11	IgG3	0	FALSE	0	0.99	FALSE	1
462	587.262	11	IgG3		1	EEQYNSTFR	EEQYN[11.462]STFR	2	Y	2	1	11	IgG3	0	FALSE	0	0.99	FALSE	1
487	587.262	11	IgG3		1	EEQYNSTFR	EEQYN[11.487]STFR	2	Y	2	1	11	IgG3	0	FALSE	0	0.99	FALSE	1
512	587.262	11	IgG3		1	EEQYNSTFR	EEQYN[11.512]STFR	2	Y	2	1	11	IgG3	0	FALSE	0	0.99	FALSE	1
537	587.262	11	IgG3		1	EEQYNSTFR	EEQYN[11.537]STFR	2	Y	2	1	11	IgG3	0	FALSE	0	0.99	FALSE	1
562	587.262	11	IgG3		1	EEQYNSTFR	EEQYN[11.562]STFR	2	Y	2	1	11	IgG3	0	FALSE	0	0.99	FALSE	1
587	587.262	11	IgG3		1	EEQYNSTFR	EEQYN[11.587]STFR	2	Y	2	1	11	IgG3	0	FALSE	0	0.99	FALSE	1
612	587.262	11	IgG3		1	EEQYNSTFR	EEQYN[11.612]STFR	2	Y	2	1	11	IgG3	0	FALSE	0	0.99	FALSE	1
637	587.262	11	IgG3		1	EEQYNSTFR	EEQYN[11.637]STFR	2	Y	2	1	11	IgG3	0	FALSE	0	0.99	FALSE	1
662	587.262	11	IgG3		1	EEQYNSTFR	EEQYN[11.662]STFR	2	Y	2	1	11	IgG3	0	FALSE	0	0.99	FALSE	1
687	587.262	11	IgG3		1	EEQYNSTFR	EEQYN[11.687]STFR	2	Y	2	1	11	IgG3	0	FALSE	0	0.99	FALSE	1
712	587.262	11	IgG3		1	EEQYNSTFR	EEQYN[11.712]STFR	2	Y	2	1	11	IgG3	0	FALSE	0	0.99	FALSE	1
737	587.262	11	IgG3		1	EEQYNSTFR	EEQYN[11.737]STFR	2	Y	2	1	11	IgG3	0	FALSE	0	0.99	FALSE	1
762	587.262	11	IgG3		1	EEQYNSTFR	EEQYN[11.762]STFR	2	Y	2	1	11	IgG3	0	FALSE	0	0.99	FALSE	1
787	587.262	11	IgG3		1	EEQYNSTFR	EEQYN[11.787]STFR	2	Y	2	1	11	IgG3	0	FALSE	0	0.99	FALSE	1
812	587.262	11	IgG3		1	EEQYNSTFR	EEQYN[11.812]STFR	2	Y	2	1	11	IgG3	0	FALSE	0	0.99	FALSE	1
837	587.262	11	IgG3		1	EEQYNSTFR	EEQYN[11.837]STFR	2	Y	2	1	11	IgG3	0	FALSE	0	0.99	FALSE	1
862	587.262	11	IgG3		1	EEQYNSTFR	EEQYN[11.862]STFR	2	Y	2	1	11	IgG3	0	FALSE	0	0.99	FALSE	1
887	587.262	11	IgG3		1	EEQYNSTFR	EEQYN[11.887]STFR	2	Y	2	1	11	IgG3	0	FALSE	0	0.99	FALSE	1
912	587.262	11	IgG3		1	EEQYNSTFR	EEQYN[11.912]STFR	2	Y	2	1	11	IgG3	0	FALSE	0	0.99	FALSE	1
937	587.262	11	IgG3		1	EEQYNSTFR	EEQYN[11.937]STFR	2	Y	2	1	11	IgG3	0	FALSE	0	0.99	FALSE	1
962	587.262	11	IgG3		1	EEQYNSTFR	EEQYN[11.962]STFR	2	Y	2	1	11	IgG3	0	FALSE	0	0.99	FALSE	1
987	587.262	11	IgG3		1	EEQYNSTFR	EEQYN[11.987]STFR	2	Y	2	1	11	IgG3	0	FALSE	0	0.99	FALSE	1
1012	587.262	11	IgG3		1	EEQYNSTFR	EEQYN[11.1012]STFR	2	Y	2	1	11	IgG3	0	FALSE	0	0.99	FALSE	1
1037	587.262	11	IgG3		1	EEQYNSTFR	EEQYN[11.1037]STFR	2	Y	2	1	11	IgG3	0	FALSE	0	0.99	FALSE	1
1062	587.262	11	IgG3		1	EEQYNSTFR	EEQYN[11.1062]STFR	2	Y	2	1	11	IgG3	0	FALSE	0	0.99	FALSE	1
1087	587.262	11	IgG3		1	EEQYNSTFR	EEQYN[11.1087]STFR	2	Y	2	1	11	IgG3	0	FALSE	0	0.99	FALSE	1
1112	587.262	11	IgG3		1	EEQYNSTFR	EEQYN[11.1112]STFR	2	Y	2	1	11	IgG3	0	FALSE	0	0.99	FALSE	1
1137	587.262	11	IgG3		1	EEQYNSTFR	EEQYN[11.1137]STFR	2	Y	2	1	11	IgG3	0	FALSE	0	0.99	FALSE	1
1162	587.262	11	IgG3		1	EEQYNSTFR	EEQYN[11.1162]STFR	2	Y	2	1	11	IgG3	0	FALSE	0	0.99	FALSE	1
1187	587.262	11	IgG3		1	EEQYNSTFR	EEQYN[11.1187]STFR	2	Y	2	1	11	IgG3	0	FALSE	0	0.99	FALSE	1
1212	587.262	11	IgG3		1	EEQYNSTFR	EEQYN[11.1212]STFR	2	Y	2	1	11	IgG3	0	FALSE	0	0.99	FALSE	1
1237	587.262	11	IgG3		1	EEQYNSTFR	EEQYN[11.1237]STFR	2	Y	2	1	11	IgG3	0	FALSE	0	0.99	FALSE	1
412.5	1173.52	12	IgG3		1	EEQYNSTFR	EEQYN[12.412]STFR	2	Y	1	1	12	IgG3	0	FALSE	0	0.99	FALSE	1
437	1173.52	12	IgG3		1	EEQYNSTFR	EEQYN[12.437]STFR	2	Y	1	1	12	IgG3	0	FALSE	0	0.99	FALSE	1
462	1173.52	12	IgG3		1	EEQYNSTFR	EEQYN[12.462]STFR	2	Y	1	1	12	IgG3	0	FALSE	0	0.99	FALSE	1
487	1173.52	12	IgG3		1	EEQYNSTFR	EEQYN[12.487]STFR	2	Y	1	1	12	IgG3	0	FALSE	0	0.99	FALSE	1
512	1173.52	12	IgG3		1	EEQYNSTFR	EEQYN[12.512]STFR	2	Y	1	1	12	IgG3	0	FALSE	0	0.99	FALSE	1
537	1173.52	12	IgG3		1	EEQYNSTFR	EEQYN[12.537]STFR	2	Y	1	1	12	IgG3	0	FALSE	0	0.99	FALSE	1
562	1173.52	12	IgG3		1	EEQYNSTFR	EEQYN[12.562]STFR	2	Y	1	1	12	IgG3	0	FALSE	0	0.99	FALSE	1
587	1173.52	12	IgG3		1	EEQYNSTFR	EEQYN[12.587]STFR	2	Y	1	1	12	IgG3	0	FALSE	0	0.99	FALSE	1
612	1173.52	12	IgG3		1	EEQYNSTFR	EEQYN[12.612]STFR	2	Y	1	1	12	IgG3	0	FALSE	0	0.99	FALSE	1
637	1173.52	12	IgG3		1	EEQYNSTFR	EEQYN[12.637]STFR	2	Y	1	1	12	IgG3	0	FALSE	0	0.99	FALSE	1
662	1173.52	12	IgG3		1	EEQYNSTFR	EEQYN[12.662]STFR	2	Y	1	1	12	IgG3	0	FALSE	0	0.99	FALSE	1
687	1173.52	12	IgG3		1	EEQYNSTFR	EEQYN[12.687]STFR	2	Y	1	1	12	IgG3	0	FALSE	0	0.99	FALSE	1
712	1173.52	12	IgG3		1	EEQYNSTFR	EEQYN[12.712]STFR	2	Y	1	1	12	IgG3	0	FALSE	0	0.99	FALSE	1
737	1173.52	12	IgG3		1	EEQYNSTFR	EEQYN[12.737]STFR	2	Y	1	1	12	IgG3	0	FALSE	0	0.99	FALSE	1
762	1173.52	12	IgG3		1	EEQYNSTFR	EEQYN[12.762]STFR	2	Y	1	1	12	IgG3	0	FALSE	0	0.99	FALSE	1
787	1173.52	12	IgG3		1	EEQYNSTFR	EEQYN[12.787]STFR	2	Y	1	1	12	IgG3	0	FALSE	0	0.99	FALSE	1
812	1173.52	12	IgG3		1	EEQYNSTFR	EEQYN[12.812]STFR	2	Y	1	1	12	IgG3	0	FALSE	0	0.99	FALSE	1
837	1173.52	12	IgG3		1	EEQYNSTFR	EEQYN[12.837]STFR	2	Y	1	1	12	IgG3	0	FALSE	0	0.99	FALSE	1
862	1173.52	12	IgG3		1	EEQYNSTFR	EEQYN[12.862]STFR	2	Y	1	1	12	IgG3	0	FALSE	0	0.99	FALSE	1
887	1173.52	12	IgG3		1	EEQYNSTFR	EEQYN[12.887]STFR	2	Y	1	1	12	IgG3	0	FALSE	0	0.99	FALSE	1
912	1173.52	12	IgG3		1	EEQYNSTFR	EEQYN[12.912]STFR	2	Y	1	1	12	IgG3	0	FALSE	0	0.99	FALSE	1
937	1173.52	12	IgG3		1	EEQYNSTFR	EEQYN[12.937]STFR	2	Y	1	1	12	IgG3	0	FALSE	0	0.99	FALSE	1
962	1173.52	12	IgG3		1	EEQYNSTFR	EEQYN[12.962]STFR	2	Y	1	1	12	IgG3	0	FALSE	0	0.99	FALSE	1
987	1173.52	12	IgG3		1	EEQYNSTFR	EEQYN[12.987]STFR	2	Y	1	1	12	IgG3	0	FALSE	0	0.99	FALSE	1
1012	1173.52	12	IgG3		1	EEQYNSTFR	EEQYN[12.1012]STFR	2	Y	1	1	12	IgG3	0	FALSE	0	0.99	FALSE	1
1037	1173.52	12	IgG3		1	EEQYNSTFR	EEQYN[12.1037]STFR	2	Y	1	1	12	IgG3	0	FALSE	0	0.99	FALSE	1
1062	1173.52	12	IgG3		1	EEQYNSTFR	EEQYN[12.1062]STFR	2	Y	1	1	12	IgG3	0	FALSE	0	0.99	FALSE	1
1087	1173.52	12	IgG3		1	EEQYNSTFR	EEQYN[12.1087]STFR	2	Y	1	1	12	IgG3	0	FALSE	0	0.99	FALSE	1
1112	1173.52	12	IgG3		1	EEQYNSTFR	EEQYN[12.1112]STFR	2	Y	1	1	12	IgG3	0	FALSE	0	0.99	FALSE	1
1137	1173.52	12	IgG3		1	EEQYNSTFR	EEQYN[12.1137]STFR	2	Y	1	1	12	IgG3	0	FALSE	0	0.99	FALSE	1
1162	1173.52	12	IgG3		1	EEQYNSTFR	EEQYN[12.1162]STFR	2	Y	1	1	12	IgG3	0	FALSE	0	0.99	FALSE	1
1187	1173.52	12	IgG3		1	EEQYNSTFR	EEQYN[12.1187]STFR	2	Y	1	1	12	IgG3	0	FALSE	0	0.99	FALSE	1
1212	1173.52	12	IgG3		1	EEQYNSTFR	EEQYN[12.1212]STFR	2	Y	1	1	12	IgG3	0	FALSE	0	0.99	FALSE	1
1237	1173.52	12	IgG3		1	EEQYNSTFR	EEQYN[12.1237]STFR	2	Y	1	1	12	IgG3	0	FALSE	0	0.99	FALSE	1
412.5	587.262	12	IgG3		1	EEQYNSTFR	EEQYN[12.412]STFR	2	Y	2	1	12	IgG3	0	FALSE	0	0.99	FALSE	1
437	587.262	12	IgG3		1	EEQYNSTFR	EEQYN[12.437]STFR	2	Y	2	1	12	IgG3	0	FALSE	0	0.99	FALSE	1
462	587.262	12	IgG3		1	EEQYNSTFR	EEQYN[12.462]STFR	2	Y	2	1	12	IgG3	0	FALSE	0	0.99	FALSE	1
487	587.262	12	IgG3		1	EEQYNSTFR	EEQYN[12.487]STFR	2	Y	2	1	12	IgG3	0	FALSE	0	0.99	FALSE	1
512	587.262	12	IgG3		1	EEQYNSTFR	EEQYN[12.512]STFR	2	Y	2	1	12	IgG3	0	FALSE	0	0.99	FALSE	1
537	587.262	12	IgG3		1	EEQYNSTFR	EEQYN[12.537]STFR	2	Y	2	1	12	IgG3	0	FALSE	0	0.99	FALSE	1
562	587.262	12	IgG3		1	EEQYNSTFR	EEQYN[12.562]STFR	2	Y	2	1	12	IgG3	0	FALSE	0	0.99	FALSE	1
587	587.262	12	IgG3		1	EEQYNSTFR	EEQYN[12.587]STFR	2	Y	2	1	12	IgG3	0	FALSE	0	0.99	FALSE	1
612	587.262	12	IgG3		1	EEQYNSTFR	EEQYN[12.612]STFR	2	Y	2	1	12	IgG3	0	FALSE	0	0.99	FALSE	1
637	587.262	12	IgG3		1	EEQYNSTFR	EEQYN[12.637]STFR	2	Y	2	1	12	IgG3	0	FALSE	0	0.99	FALSE	1
662	587.262	12	IgG3		1	EEQYNSTFR	EEQYN[12.662]STFR	2	Y	2	1	12	IgG3	0	FALSE	0	0.99	FALSE	1
687	587.262	12	IgG3		1	EEQYNSTFR	EEQYN[12.687]STFR	2	Y	2	1	12	IgG3	0	FALSE	0	0.99	FALSE	1
712	587.262	12	IgG3		1	EEQYNSTFR	EEQYN[12.712]STFR	2	Y	2	1	12	IgG3	0	FALSE	0	0.99	FALSE	1
737	587.262	12	IgG3		1	EEQYNSTFR	EEQYN[12.737]STFR	2	Y	2	1	12	IgG3	0	FALSE	0	0.99	FALSE	1
762	587.262	12	IgG3		1	EEQYNSTFR	EEQYN[12.762]STFR	2	Y	2	1	12	IgG3	0	FALSE	0	0.99	FALSE	1
787	587.262	12	IgG3		1	EEQYNSTFR	EEQYN[12.787]STFR	2	Y	2	1	12	IgG3	0	FALSE	0	0.99	FALSE	1
812	587.262	12	IgG3		1	EEQYNSTFR	EEQYN[12.812]STFR	2	Y	2	1	12	IgG3	0	FALSE	0	0.99	FALSE	1
837	587.262	12	IgG3		1	EEQYNSTFR	EEQYN[12.837]STFR	2	Y	2	1	12	IgG3	0	FALSE	0	0.99	FALSE	1
862	587.262	12	IgG3		1	EEQYNSTFR	EEQYN[12.862]STFR	2	Y	2	1	12	IgG3	0	FALSE	0	0.99	FALSE	1
887	587.262	12	IgG3		1	EEQYNSTFR	EEQYN[12.887]STFR	2	Y	2	1	12	IgG3	0	FALSE	0	0.99	FALSE	1
912	587.262	12	IgG3		1	EEQYNSTFR	EEQYN[12.912]STFR	2	Y	2	1	12	IgG3	0	FALSE	0	0.99	FALSE	1
937	587.262	12	IgG3		1	EEQYNSTFR	EEQYN[12.937]STFR	2	Y	2	1	12	IgG3	0	FALSE	0	0.99	FALSE	1
962	587.262	12	IgG3		1	EEQYNSTFR	EEQYN[12.962]STFR	2	Y	2	1	12	IgG3	0	FALSE	0	0.99	FALSE	1
987	587.262	12	IgG3		1	EEQYNSTFR	EEQYN[12.987]STFR	2	Y	2	1	12	IgG3	0	FALSE	0	0.99	FALSE	1
1012	587.262	12	IgG3		1	EEQYNSTFR	EEQYN[12.1012]STFR	2	Y	2	1	12	IgG3	0	FALSE	0	0.99	FALSE	1
1037	587.262	12	IgG3		1	EEQYNSTFR	EEQYN[12.1037]STFR	2	Y	2	1	12	IgG3	0	FALSE	0	0.99	FALSE	1
1062	587.262	12	IgG3		1	EEQYNSTFR	EEQYN[12.1062]STFR	2	Y	2	1	12	IgG3	0	FALSE	0	0.99	FALSE	1
1087	587.262	12	IgG3		1	EEQYNSTFR	EEQYN[12.1087]STFR	2	Y	2	1	12	IgG3	0	FALSE	0	0.99	FALSE	1
1112	587.262	12	IgG3		1	EEQYNSTFR	EEQYN[12.1112]STFR	2	Y	2	1	12	IgG3	0	FALSE	0	0.99	FALSE	1
1137	587.262	12	IgG3		1	EEQYNSTFR	EEQYN[12.1137]STFR	2	Y	2	1	12	IgG3	0	FALSE	0	0.99	FALSE	1
1162	587.262	12	IgG3		1	EEQYNSTFR	EEQYN[12.1162]STFR	2	Y	2	1	12	IgG3	0	FALSE	0	0.99	FALSE	1
1187	587.262	12	IgG3		1	EEQYNSTFR	EEQYN[12.1187]STFR	2	Y	2	1	12	IgG3	0	FALSE	0	0.99	FALSE	1
1212	587.262	12	IgG3		1	EEQYNSTFR	EEQYN[12.1212]STFR	2	Y	2	1	12	IgG3	0	FALSE	0	0.99	FALSE	1
1237	587.262	12	IgG3		1	EEQYNSTFR	EEQYN[12.1237]STFR	2	Y	2	1	12	IgG3	0	FALSE	0	0.99	FALSE	1
412.5	1173.52	13	IgG3		1	EEQYNSTFR	EEQYN[13.412]STFR	2	Y	1	1	13	IgG3	0	FALSE	0	0.99	FALSE	1
437	1173.52	13	IgG3		1	EEQYNSTFR	EEQYN[13.437]STFR	2	Y	1	1	13	IgG3	0	FALSE	0	0.99	FALSE	1
462	1173.52	13	IgG3		1	EEQYNSTFR	EEQYN[13.462]STFR	2	Y	1	1	13	IgG3	0	FALSE	0	0.99	FALSE	1
487	1173.52	13	IgG3		1	EEQYNSTFR	EEQYN[13.487]STFR	2	Y	1	1	13	IgG3	0	FALSE	0	0.99	FALSE	1
512	1173.52	13	IgG3		1	EEQYNSTFR	EEQYN[13.512]STFR	2	Y	1	1	13	IgG3	0	FALSE	0	0.99	FALSE	1
537	1173.52	13	IgG3		1	EEQYNSTFR	EEQYN[13.537]STFR	2	Y	1	1	13	IgG3	0	FALSE	0	0.99	FALSE	1
562	1173.52	13	IgG3		1	EEQYNSTFR	EEQYN[13.562]STFR	2	Y	1	1	13	IgG3	0	FALSE	0	0.99	FALSE	1
587	1173.52	13	IgG3		1	EEQYNSTFR	EEQYN[13.587]STFR	2	Y	1	1	13	IgG3	0	FALSE	0	0.99	FALSE	1
612	1173.52	13	IgG3		1	EEQYNSTFR	EEQYN[13.612]STFR	2	Y	1	1	13	IgG3	0	FALSE	0	0.99	FALSE	1
637	1173.52	13	IgG3		1	EEQYNSTFR	EEQYN[13.637]STFR	2	Y	1	1	13	IgG3	0	FALSE	0	0.99	FALSE	1
662	1173.52	13	IgG3		1	EEQYNSTFR	EEQYN[13.662]STFR	2	Y	1	1	13	IgG3	0	FALSE	0	0.99	FALSE	1
687	1173.52	13	IgG3		1	EEQYNSTFR	EEQYN[13.687]STFR	2	Y	1	1	13	IgG3	0	FALSE	0	0.99	FALSE	1
712	1173.52	13	IgG3		1	EEQYNSTFR	EEQYN[13.712]STFR	2	Y	1	1	13	IgG3	0	FALSE	0	0.99	FALSE	1
737	1173.52	13	IgG3		1	EEQYNSTFR	EEQYN[13.737]STFR	2	Y	1	1	13	IgG3	0	FALSE	0	0.99	FALSE	1
762	1173.52	13	IgG3		1	EEQYNSTFR	EEQYN[13.762]STFR	2	Y	1	1	13	IgG3	0	FALSE	0	0.99	FALSE	1
787	1173.52	13	IgG3		1	EEQYNSTFR	EEQYN[13.787]STFR	2	Y	1	1	13	IgG3	0	FALSE	0	0.99	FALSE	1
812	1173.52	13	IgG3		1	EEQYNSTFR	EEQYN[13.812]STFR	2	Y	1	1	13	IgG3	0	FALSE	0	0.99	FALSE	1
837	1173.52	13	IgG3		1	EEQYNSTFR	EEQYN[13.837]STFR	2	Y	1	1	13	IgG3	0	FALSE	0	0.99	FALSE	1
862	1173.52	13	IgG3		1	EEQYNSTFR	EEQYN[13.862]STFR	2	Y	1	1	13	IgG3	0	FALSE	0	0.99	FALSE	1
887	1173.52	13	IgG3		1	EEQYNSTFR	EEQYN[13.887]STFR	2	Y	1	1	13	IgG3	0	FALSE	0	0.99	FALSE	1
912	1173.52	13	IgG3		1	EEQYNSTFR	EEQYN[13.912]STFR	2	Y	1	1	13	IgG3	0	FALSE	0	0.99	FALSE	1
937	1173.52	13	IgG3		1	EEQYNSTFR	EEQYN[13.937]STFR	2	Y	1	1	13	IgG3	0	FALSE	0	0.99	FALSE	1
962	1173.52	13	IgG3		1	EEQYNSTFR	EEQYN[13.962]STFR	2	Y	1	1	13	IgG3	0	FALSE	0	0.99	FALSE	1
987	1173.52	13	IgG3		1	EEQYNSTFR	EEQYN[13.987]STFR	2	Y	1	1	13	IgG3	0	FALSE	0	0.99	FALSE	1
1012	1173.52	13	IgG3		1	EEQYNSTFR	EEQYN[13.1012]STFR	2	Y	1	1	13	IgG3	0	FALSE	0	0.99	FALSE	1
1037	1173.52	13	IgG3		1	EEQYNSTFR	EEQYN[13.1037]STFR	2	Y	1	1	13	IgG3	0	FALSE	0	0.99	FALSE	1
1062	1173.52	13	IgG3		1	EEQYNSTFR	EEQYN[13.1062]STFR	2	Y	1	1	13	IgG3	0	FALSE	0	0.99	FALSE	1
1087	1173.52	13	IgG3		1	EEQYNSTFR	EEQYN[13.1087]STFR	2	Y	1	1	13	IgG3	0	FALSE	0	0.99	FALSE	1
1112	1173.52	13	IgG3		1	EEQYNSTFR	EEQYN[13.1112]STFR	2	Y	1	1	13	IgG3	0	FALSE	0	0.99	FALSE	1
1137	1173.52	13	IgG3		1	EEQYNSTFR	EEQYN[13.1137]STFR	2	Y	1	1	13	IgG3	0	FALSE	0	0.99	FALSE	1
1162	1173.52	13	IgG3		1	EEQYNSTFR	EEQYN[13.1162]STFR	2	Y	1	1	13	IgG3	0	FALSE	0	0.99	FALSE	1
1187	1173.52	13	IgG3		1	EEQYNSTFR	EEQYN[13.1187]STFR	2	Y	1	1	13	IgG3	0	FALSE	0	0.99	FALSE	1
1212	1173.52	13	IgG3		1	EEQYNSTFR	EEQYN[13.1212]STFR	2	Y	1	1	13	IgG3	0	FALSE	0	0.99	FALSE	1
1237	1173.52	13	IgG3		1	EEQYNSTFR	EEQYN[13.1237]STFR	2	Y	1	1	13	IgG3	0	FALSE	0	0.99	FALSE	1
412.5	587.262	13	IgG3		1	EEQYNSTFR	EEQYN[13.412]STFR	2	Y	2	1	13	IgG3	0	FALSE	0	0.99	FALSE	1
437	587.262	13	IgG3		1	EEQYNSTFR	EEQYN[13.437]STFR	2	Y	2	1	13	IgG3	0	FALSE	0	0.99	FALSE	1
462	587.262	13	IgG3		1	EEQYNSTFR	EEQYN[13.462]STFR	2	Y	2	1	13	IgG3	0	FALSE	0	0.99	FALSE	1
487	587.262	13	IgG3		1	EEQYNSTFR	EEQYN[13.487]STFR	2	Y	2	1	13	IgG3	0	FALSE	0	0.99	FALSE	1
512	587.262	13	IgG3		1	EEQYNSTFR	EEQYN[13.512]STFR	2	Y	2	1	13	IgG3	0	FALSE	0	0.99	FALSE	1
537	587.262	13	IgG3		1	EEQYNSTFR	EEQYN[13.537]STFR	2	Y	2	1	13	IgG3	0	FALSE	0	0.99	FALSE	1
562	587.262	13	IgG3		1	EEQYNSTFR	EEQYN[13.562]STFR	2	Y	2	1	13	IgG3	0	FALSE	0	0.99	FALSE	1
587	587.262	13	IgG3		1	EEQYNSTFR	EEQYN[13.587]STFR	2	Y	2	1	13	IgG3	0	FALSE	0	0.99	FALSE	1
612	587.262	13	IgG3		1	EEQYNSTFR	EEQYN[13.612]STFR	2	Y	2	1	13	IgG3	0	FALSE	0	0.99	FALSE	1
637	587.262	13	IgG3		1	EEQYNSTFR	EEQYN[13.637]STFR	2	Y	2	1	13	IgG3	0	FALSE	0	0.99	FALSE	1
662	587.262	13	IgG3		1	EEQYNSTFR	EEQYN[13.662]STFR	2	Y	2	1	13	IgG3	0	FALSE	0	0.99	FALSE	1
687	587.262	13	IgG3		1	EEQYNSTFR	EEQYN[13.687]STFR	2	Y	2	1	13	IgG3	0	FALSE	0	0.99	FALSE	1
712	587.262	13	IgG3		1	EEQYNSTFR	EEQYN[13.712]STFR	2	Y	2	1	13	IgG3	0	FALSE	0	0.99	FALSE	1
737	587.262	13	IgG3		1	EEQYNSTFR	EEQYN[13.737]STFR	2	Y	2	1	13	IgG3	0	FALSE	0	0.99	FALSE	1
762	587.262	13	IgG3		1	EEQYNSTFR	EEQYN[13.762]STFR	2	Y	2	1	13	IgG3	0	FALSE	0	0.99	FALSE	1
787	587.262	13	IgG3		1	EEQYNSTFR	EEQYN[13.787]STFR	2	Y	2	1	13	IgG3	0	FALSE	0	0.99	FALSE	1
812	587.262	13	IgG3		1	EEQYNSTFR	EEQYN[13.812]STFR	2	Y	2	1	13	IgG3	0	FALSE	0	0.99	FALSE	1
837	587.262	13	IgG3		1	EEQYNSTFR	EEQYN[13.837]STFR	2	Y	2	1	13	IgG3	0	FALSE	0	0.99	FALSE	1
862	587.262	13	IgG3		1	EEQYNSTFR	EEQYN[13.862]STFR	2	Y	2	1	13	IgG3	0	FALSE	0	0.99	FALSE	1
887	587.262	13	IgG3		1	EEQYNSTFR	EEQYN[13.887]STFR	2	Y	2	1	13	IgG3	0	FALSE	0	0.99	FALSE	1
912	587.262	13	IgG3		1	EEQYNSTFR	EEQYN[13.912]STFR	2	Y	2	1	13	IgG3	0	FALSE	0	0.99	FALSE	1
937	587.262	13	IgG3		1	EEQYNSTFR	EEQYN[13.937]STFR	2	Y	2	1	13	IgG3	0	FALSE	0	0.99	FALSE	1
962	587.262	13	IgG3		1	EEQYNSTFR	EEQYN[13.962]STFR	2	Y	2	1	13	IgG3	0	FALSE	0	0.99	FALSE	1
987	587.262	13	IgG3		1	EEQYNSTFR	EEQYN[13.987]STFR	2	Y	2	1	13	IgG3	0	FALSE	0	0.99	FALSE	1
1012	587.262	13	IgG3		1	EEQYNSTFR	EEQYN[13.1012]STFR	2	Y	2	1	13	IgG3	0	FALSE	0	0.99	FALSE	1
1037	587.262	13	IgG3		1	EEQYNSTFR	EEQYN[13.1037]STFR	2	Y	2	1	13	IgG3	0	FALSE	0	0.99	FALSE	1
1062	587.262	13	IgG3		1	EEQYNSTFR	EEQYN[13.1062]STFR	2	Y	2	1	13	IgG3	0	FALSE	0	0.99	FALSE	1
1087	587.262	13	IgG3		1	EEQYNSTFR	EEQYN[13.1087]STFR	2	Y	2	1	13	IgG3	0	FALSE	0	0.99	FALSE	1
1112	587.262	13	IgG3		1	EEQYNSTFR	EEQYN[13.1112]STFR	2	Y	2	1	13	IgG3	0	FALSE	0	0.99	FALSE	1
1137	587.262	13	IgG3		1	EEQYNSTFR	EEQYN[13.1137]STFR	2	Y	2	1	13	IgG3	0	FALSE	0	0.99	FALSE	1
1162	587.262	13	IgG3		1	EEQYNSTFR	EEQYN[13.1162]STFR	2	Y	2	1	13	IgG3	0	FALSE	0	0.99	FALSE	1
1187	587.262	13	IgG3		1	EEQYNSTFR	EEQYN[13.1187]STFR	2	Y	2	1	13	IgG3	0	FALSE	0	0.99	FALSE	1
1212	587.262	13	IgG3		1	EEQYNSTFR	EEQYN[13.1212]STFR	2	Y	2	1	13	IgG3	0	FALSE	0	0.99	FALSE	1
1237	587.262	13	IgG3		1	EEQYNSTFR	EEQYN[13.1237]STFR	2	Y	2	1	13	IgG3	0	FALSE	0	0.99	FALSE	1
412.5	1173.52	14	IgG3		1	EEQYNSTFR	EEQYN[14.412]STFR	2	Y	1	1	14	IgG3	0	FALSE	0	0.99	FALSE	1
437	1173.52	14	IgG3		1	EEQYNSTFR	EEQYN[14.437]STFR	2	Y	1	1	14	IgG3	0	FALSE	0	0.99	FALSE	1
462	1173.52	14	IgG3		1	EEQYNSTFR	EEQYN[14.462]STFR	2	Y	1	1	14	IgG3	0	FALSE	0	0.99	FALSE	1
487	1173.52	14	IgG3		1	EEQYNSTFR	EEQYN[14.487]STFR	2	Y	1	1	14	IgG3	0	FALSE	0	0.99	FALSE	1
512	1173.52	14	IgG3		1	EEQYNSTFR	EEQYN[14.512]STFR	2	Y	1	1	14	IgG3	0	FALSE	0	0.99	FALSE	1
537	1173.52	14	IgG3		1	EEQYNSTFR	EEQYN[14.537]STFR	2	Y	1	1	14	IgG3	0	FALSE	0	0.99	FALSE	1
562	1173.52	14	IgG3		1	EEQYNSTFR	EEQYN[14.562]STFR	2	Y	1	1	14	IgG3	0	FALSE	0	0.99	FALSE	1
587	1173.52	14	IgG3		1	EEQYNSTFR	EEQYN[14.587]STFR	2	Y	1	1	14	IgG3	0	FALSE	0	0.99	FALSE	1
612	1173.52	14	IgG3		1	EEQYNSTFR	EEQYN[14.612]STFR	2	Y	1	1	14	IgG3	0	FALSE	0	0.99	FALSE	1
637	1173.52	14	IgG3		1	EEQYNSTFR	EEQYN[14.637]STFR	2	Y	1	1	14	IgG3	0	FALSE	0	0.99	FALSE	1
662	1173.52	14	IgG3		1	EEQYNSTFR	EEQYN[14.662]STFR	2	Y	1	1	14	IgG3	0	FALSE	0	0.99	FALSE	1
687	1173.52	14	IgG3		1	EEQYNSTFR	EEQYN[14.687]STFR	2	Y	1	1	14	IgG3	0	FALSE	0	0.99	FALSE	1
712	1173.52	14	IgG3		1	EEQYNSTFR	EEQYN[14.712]STFR	2	Y	1	1	14	IgG3	0	FALSE	0	0.99	FALSE	1
737	1173.52	14	IgG3		1	EEQYNSTFR	EEQYN[14.737]STFR	2	Y	1	1	14	IgG3	0	FALSE	0	0.99	FALSE	1
762	1173.52	14	IgG3		1	EEQYNSTFR	EEQYN[14.762]STFR	2	Y	1	1	14	IgG3	0	FALSE	0	0.99	FALSE	1
787	1173.52	14	IgG3		1	EEQYNSTFR	EEQYN[14.787]STFR	2	Y	1	1	14	IgG3	0	FALSE	0	0.99	FALSE	1
812	1173.52	14	IgG3		1	EEQYNSTFR	EEQYN[14.812]STFR	2	Y	1	1	14	IgG3	0	FALSE	0	0.99	FALSE	1
837	1173.52	14	IgG3		1	EEQYNSTFR	EEQYN[14.837]STFR	2	Y	1	1	14	IgG3	0	FALSE	0	0.99	FALSE	1
862	1173.52	14	IgG3		1	EEQYNSTFR	EEQYN[14.862]STFR	2	Y	1	1	14	IgG3	0	FALSE	0	0.99	FALSE	1
887	1173.52	14	IgG3		1	EEQYNSTFR	EEQYN[14.887]STFR	2	Y	1	1	14	IgG3	0	FALSE	0	0.99	FALSE	1
912	1173.52	14	IgG3		1	EEQYNSTFR	EEQYN[14.912]STFR	2	Y	1	1	14	IgG3	0	FALSE	0	0.99	FALSE	1
937	1173.52	14	IgG3		1	EEQYNSTFR	EEQYN[14.937]STFR	2	Y	1	1	14	IgG3	0	FALSE	0	0.99	FALSE	1
962	1173.52	14	IgG3		1	EEQYNSTFR	EEQYN[14.962]STFR	2	Y	1	1	14	IgG3	0	FALSE	0	0.99	FALSE	1
987	1173.52	14	IgG3		1	EEQYNSTFR	EEQYN[14.987]STFR	2	Y	1	1	14	IgG3	0	FALSE	0	0.99	FALSE	1
1012	1173.52	14	IgG3		1	EEQYNSTFR	EEQYN[14.1012]STFR	2	Y	1	1	14	IgG3	0	FALSE	0	0.99	FALSE	1
1037	1173.52	14	IgG3		1	EEQYNSTFR	EEQYN[14.1037]STFR	2	Y	1	1	14	IgG3	0	FALSE	0	0.99	FALSE	1
1062	1173.52	14	IgG3		1	EEQYNSTFR	EEQYN[14.1062]STFR	2	Y	1	1	14	IgG3	0	FALSE	0	0.99	FALSE	1
1087	1173.52	14	IgG3		1	EEQYNSTFR	EEQYN[14.1087]STFR	2	Y	1	1	14	IgG3	0	FALSE	0	0.99	FALSE	1
1112	1173.52	14	IgG3		1	EEQYNSTFR	EEQYN[14.1112]STFR	2	Y	1	1	14	IgG3	0	FALSE	0	0.99	FALSE	1
1137	1173.52	14	IgG3		1	EEQYNSTFR	EEQYN[14.1137]STFR	2	Y	1	1	14	IgG3	0	FALSE	0	0.99	FALSE	1
1162	1173.52	14	IgG3		1	EEQYNSTFR	EEQYN[14.1162]STFR	2	Y	1	1	14	IgG3	0	FALSE	0	0.99	FALSE	1
1187	1173.52	14	IgG3		1	EEQYNSTFR	EEQYN[14.1187]STFR	2	Y	1	1	14	IgG3	0	FALSE	0	0.99	FALSE	1
1212	1173.52	14	IgG3		1	EEQYNSTFR	EEQYN[14.1212]STFR	2	Y	1	1	14	IgG3	0	FALSE	0	0.99	FALSE	1
1237	1173.52	14	IgG3		1	EEQYNSTFR	EEQYN[14.1237]STFR	2	Y	1	1	14	IgG3	0	FALSE	0	0.99	FALSE	1
412.5	587.262	14	IgG3		1	EEQYNSTFR	EEQYN[14.412]STFR	2	Y	2	1	14	IgG3	0	FALSE	0	0.99	FALSE	1
437	587.262	14	IgG3		1	EEQYNSTFR	EEQYN[14.437]STFR	2	Y	2	1	14	IgG3	0	FALSE	0	0.99	FALSE	1
462	587.262	14	IgG3		1	EEQYNSTFR	EEQYN[14.462]STFR	2	Y	2	1	14	IgG3	0	FALSE	0	0.99	FALSE	1
487	587.262	14	IgG3		1	EEQYNSTFR	EEQYN[14.487]STFR	2	Y	2	1	14	IgG3	0	FALSE	0	0.99	FALSE	1
512	587.262	14	IgG3		1	EEQYNSTFR	EEQYN[14.512]STFR	2	Y	2	1	14	IgG3	0	FALSE	0	0.99	FALSE	1
537	587.262	14	IgG3		1	EEQYNSTFR	EEQYN[14.537]STFR	2	Y	2	1	14	IgG3	0	FALSE	0	0.99	FALSE	1
562	587.262	14	IgG3		1	EEQYNSTFR	EEQYN[14.562]STFR	2	Y	2	1	14	IgG3	0	FALSE	0	0.99	FALSE	1
587	587.262	14	IgG3		1	EEQYNSTFR	EEQYN[14.587]STFR	2	Y	2	1	14	IgG3	0	FALSE	0	0.99	FALSE	1
612	587.262	14	IgG3		1	EEQYNSTFR	EEQYN[14.612]STFR	2	Y	2	1	14	IgG3	0	FALSE	0	0.99	FALSE	1
637	587.262	14	IgG3		1	EEQYNSTFR	EEQYN[14.637]STFR	2	Y	2	1	14	IgG3	0	FALSE	0	0.99	FALSE	1
662	587.262	14	IgG3		1	EEQYNSTFR	EEQYN[14.662]STFR	2	Y	2	1	14	IgG3	0	FALSE	0	0.99	FALSE	1
687	587.262	14	IgG3		1	EEQYNSTFR	EEQYN[14.687]STFR	2	Y	2	1	14	IgG3	0	FALSE	0	0.99	FALSE	1
712	587.262	14	IgG3		1	EEQYNSTFR	EEQYN[14.712]STFR	2	Y	2	1	14	IgG3	0	FALSE	0	0.99	FALSE	1
737	587.262	14	IgG3		1	EEQYNSTFR	EEQYN[14.737]STFR	2	Y	2	1	14	IgG3	0	FALSE	0	0.99	FALSE	1
762	587.262	14	IgG3		1	EEQYNSTFR	EEQYN[14.762]STFR	2	Y	2	1	14	IgG3	0	FALSE	0	0.99	FALSE	1
787	587.262	14	IgG3		1	EEQYNSTFR	EEQYN[14.787]STFR	2	Y	2	1	14	IgG3	0	FALSE	0	0.99	FALSE	1
812	587.262	14	IgG3		1	EEQYNSTFR	EEQYN[14.812]STFR	2	Y	2	1	14	IgG3	0	FALSE	0	0.99	FALSE	1
837	587.262	14	IgG3		1	EEQYNSTFR	EEQYN[14.837]STFR	2	Y	2	1	14	IgG3	0	FALSE	0	0.99	FALSE	1
862	587.262	14	IgG3		1	EEQYNSTFR	EEQYN[14.862]STFR	2	Y	2	1	14	IgG3	0	FALSE	0	0.99	FALSE	1
887	587.262	14	IgG3		1	EEQYNSTFR	EEQYN[14.887]STFR	2	Y	2	1	14	IgG3	0	FALSE	0	0.99	FALSE	1
912	587.262	14	IgG3		1	EEQYNSTFR	EEQYN[14.912]STFR	2	Y	2	1	14	IgG3	0	FALSE	0	0.99	FALSE	1
937	587.262	14	IgG3		1	EEQYNSTFR	EEQYN[14.937]STFR	2	Y	2	1	14	IgG3	0	FALSE	0	0.99	FALSE	1
962	587.262	14	IgG3		1	EEQYNSTFR	EEQYN[14.962]STFR	2	Y	2	1	14	IgG3	0	FALSE	0	0.99	FALSE	1
987	587.262	14	IgG3		1	EEQYNSTFR	EEQYN[14.987]STFR	2	Y	2	1	14	IgG3	0	FALSE	0	0.99	FALSE	1
1012	587.262	14	IgG3		1	EEQYNSTFR	EEQYN[14.1012]STFR	2	Y	2	1	14	IgG3	0	FALSE	0	0.99	FALSE	1
1037	587.262	14	IgG3		1	EEQYNSTFR	EEQYN[14.1037]STFR	2	Y	2	1	14	IgG3	0	FALSE	0	0.99	FALSE	1
1062	587.262	14	IgG3		1	EEQYNSTFR	EEQYN[14.1062]STFR	2	Y	2	1	14	IgG3	0	FALSE	0	0.99	FALSE	1
1087	587.262	14	IgG3		1	EEQYNSTFR	EEQYN[14.1087]STFR	2	Y	2	1	14	IgG3	0	FALSE	0	0.99	FALSE	1
1112	587.262	14	IgG3		1	EEQYNSTFR	EEQYN[14.1112]STFR	2	Y	2	1	14	IgG3	0	FALSE	0	0.99	FALSE	1
1137	587.262	14	IgG3		1	EEQYNSTFR	EEQYN[14.1137]STFR	2	Y	2	1	14	IgG3	0	FALSE	0	0.99	FALSE	1
1162	587.262	14	IgG3		1	EEQYNSTFR	EEQYN[14.1162]STFR	2	Y	2	1	14	IgG3	0	FALSE	0	0.99	FALSE	1
1187	587.262	14	IgG3		1	EEQYNSTFR	EEQYN[14.1187]STFR	2	Y	2	1	14	IgG3	0	FALSE	0	0.99	FALSE	1
1212	587.262	14	IgG3		1	EEQYNSTFR	EEQYN[14.1212]STFR	2	Y	2	1	14	IgG3	0	FALSE	0	0.99	FALSE	1
1237	587.262	14	IgG3		1	EEQYNSTFR	EEQYN[14.1237]STFR	2	Y	2	1	14	IgG3	0	FALSE	0	0.99	FALSE	1
412.5	1173.52	15	IgG3		1	EEQYNSTFR	EEQYN[15.412]STFR	2	Y	1	1	15	IgG3	0	FALSE	0	0.99	FALSE	1
437	1173.52	15	IgG3		1	EEQYNSTFR	EEQYN[15.437]STFR	2	Y	1	1	15	IgG3	0	FALSE	0	0.99	FALSE	1
462	1173.52	15	IgG3		1	EEQYNSTFR	EEQYN[15.462]STFR	2	Y	1	1	15	IgG3	0	FALSE	0	0.99	FALSE	1
487	1173.52	15	IgG3		1	EEQYNSTFR	EEQYN[15.487]STFR	2	Y	1	1	15	IgG3	0	FALSE	0	0.99	FALSE	1
512	1173.52	15	IgG3		1	EEQYNSTFR	EEQYN[15.512]STFR	2	Y	1	1	15	IgG3	0	FALSE	0	0.99	FALSE	1
537	1173.52	15	IgG3		1	EEQYNSTFR	EEQYN[15.537]STFR	2	Y	1	1	15	IgG3	0	FALSE	0	0.99	FALSE	1
562	1173.52	15	IgG3		1	EEQYNSTFR	EEQYN[15.562]STFR	2	Y	1	1	15	IgG3	0	FALSE	0	0.99	FALSE	1
587	1173.52	15	IgG3		1	EEQYNSTFR	EEQYN[15.587]STFR	2	Y	1	1	15	IgG3	0	FALSE	0	0.99	FALSE	1
612	1173.52	15	IgG3		1	EEQYNSTFR	EEQYN[15.612]STFR	2	Y	1	1	15	IgG3	0	FALSE	0	0.99	FALSE	1
637	1173.52	15	IgG3		1	EEQYNSTFR	EEQYN[15.637]STFR	2	Y	1	1	15	IgG3	0	FALSE	0	0.99	FALSE	1
662	1173.52	15	IgG3		1	EEQYNSTFR	EEQYN[15.662]STFR	2	Y	1	1	15	IgG3	0	FALSE	0	0.99	FALSE	1
687	1173.52	15	IgG3		1	EEQYNSTFR	EEQYN[15.687]STFR	2	Y	1	1	15	IgG3	0	FALSE	0	0.99	FALSE	1
712	1173.52	15	IgG3		1	EEQYNSTFR	EEQYN[15.712]STFR	2	Y	1	1	15	IgG3	0	FALSE	0	0.99	FALSE	1
737	1173.52	15	IgG3		1	EEQYNSTFR	EEQYN[15.737]STFR	2	Y	1	1	15	IgG3	0	FALSE	0	0.99	FALSE	1
762	1173.52	15	IgG3		1	EEQYNSTFR	EEQYN[15.762]STFR	2	Y	1	1	15	IgG3	0	FALSE	0	0.99	FALSE	1
787	1173.52	15	IgG3		1	EEQYNSTFR	EEQYN[15.787]STFR	2	Y	1	1	15	IgG3	0	FALSE	0	0.99	FALSE	1
812	1173.52	15	IgG3		1	EEQYNSTFR	EEQYN[15.812]STFR	2	Y	1	1	15	IgG3	0	FALSE	0	0.99	FALSE	1
837	1173.52	15	IgG3		1	EEQYNSTFR	EEQYN[15.837]STFR	2	Y	1	1	15	IgG3	0	FALSE	0	0.99	FALSE	1
862	1173.52	15	IgG3		1	EEQYNSTFR	EEQYN[15.862]STFR	2	Y	1	1	15	IgG3	0	FALSE	0	0.99	FALSE	1
887	1173.52	15	IgG3		1	EEQYNSTFR	EEQYN[15.887]STFR	2	Y	1	1	15	IgG3	0	FALSE	0	0.99	FALSE	1
912	1173.52	15	IgG3		1	EEQYNSTFR	EEQYN[15.912]STFR	2	Y	1	1	15	IgG3	0	FALSE	0	0.99	FALSE	1
937	1173.52	15	IgG3		1	EEQYNSTFR	EEQYN[15.937]STFR	2	Y	1	1	15	IgG3	0	FALSE	0	0.99	FALSE	1
962	1173.52	15	IgG3		1	EEQYNSTFR	EEQYN[15.962]STFR	2	Y	1	1	15	IgG3	0	FALSE	0	0.99	FALSE	1
987	1173.52	15	IgG3		1	EEQYNSTFR	EEQYN[15.987]STFR	2	Y	1	1	15	IgG3	0	FALSE	0	0.99	FALSE	1
1012	1173.52	15	IgG3		1	EEQYNSTFR	EEQYN[15.1012]STFR	2	Y	1	1	15	IgG3	0	FALSE	0	0.99	FALSE	1
1037	1173.52	15	IgG3		1	EEQYNSTFR	EEQYN[15.1037]STFR	2	Y	1	1	15	IgG3	0	FALSE	0	0.99	FALSE	1
1062	1173.52	15	IgG3		1	EEQYNSTFR	EEQYN[15.1062]STFR	2	Y	1	1	15	IgG3	0	FALSE	0	0.99	FALSE	1
1087	1173.52	15	IgG3		1	EEQYNSTFR	EEQYN[15.1087]STFR	2	Y	1	1	15	IgG3	0	FALSE	0	0.99	FALSE	1
1112	1173.52	15	IgG3		1	EEQYNSTFR	EEQYN[15.1112]STFR	2	Y	1	1	15	IgG3	0	FALSE	0	0.99	FALSE	1
1137	1173.52	15	IgG3		1	EEQYNSTFR	EEQYN[15.1137]STFR	2	Y	1	1	15	IgG3	0	FALSE	0	0.99	FALSE	1
1162	1173.52	15	IgG3		1	EEQYNSTFR	EEQYN[15.1162]STFR	2	Y	1	1	15	IgG3	0	FALSE	0	0.99	FALSE	1
1187	1173.52	15	IgG3		1	EEQYNSTFR	EEQYN[15.1187]STFR	2	Y	1	1	15	IgG3	0	FALSE	0	0.99	FALSE	1
1212	1173.52	15	IgG3		1	EEQYNSTFR	EEQYN[15.1212]STFR	2	Y	1	1	15	IgG3	0	FALSE	0	0.99	FALSE	1
1237	1173.52	15	IgG3		1	EEQYNSTFR	EEQYN[15.1237]STFR	2	Y	1	1	15	IgG3	0	FALSE	0	0.99	FALSE	1
412.5	587.262	15	IgG3		1	EEQYNSTFR	EEQYN[15.412]STFR	2	Y	2	1	15	IgG3	0	FALSE	0	0.99	FALSE	1
437	587.262	15	IgG3		1	EEQYNSTFR	EEQYN[15.437]STFR	2	Y	2	1	15	IgG3	0	FALSE	0	0.99	FALSE	1
462	587.262	15	IgG3		1	EEQYNSTFR	EEQYN[15.462]STFR	2	Y	2	1	15	IgG3	0	FALSE	0	0.99	FALSE	1
487	587.262	15	IgG3		1	EEQYNSTFR	EEQYN[15.487]STFR	2	Y	2	1	15	IgG3	0	FALSE	0	0.99	FALSE	1
512	587.262	15	IgG3		1	EEQYNSTFR	EEQYN[15.512]STFR	2	Y	2	1	15	IgG3	0	FALSE	0	0.99	FALSE	1
537	587.262	15	IgG3		1	EEQYNSTFR	EEQYN[15.537]STFR	2	Y	2	1	15	IgG3	0	FALSE	0	0.99	FALSE	1
562	587.262	15	IgG3		1	EEQYNSTFR	EEQYN[15.562]STFR	2	Y	2	1	15	IgG3	0	FALSE	0	0.99	FALSE	1
587	587.262	15	IgG3		1	EEQYNSTFR	EEQYN[15.587]STFR	2	Y	2	1	15	IgG3	0	FALSE	0	0.99	FALSE	1
612	587.262	15	IgG3		1	EEQYNSTFR	EEQYN[15.612]STFR	2	Y	2	1	15	IgG3	0	FALSE	0	0.99	FALSE	1
637	587.262	15	IgG3		1	EEQYNSTFR	EEQYN[15.637]STFR	2	Y	2	1	15	IgG3	0	FALSE	0	0.99	FALSE	1
662	587.262	15	IgG3		1	EEQYNSTFR	EEQYN[15.662]STFR	2	Y	2	1	15	IgG3	0	FALSE	0	0.99	FALSE	1
687	587.262	15	IgG3		1	EEQYNSTFR	EEQYN[15.687]STFR	2	Y	2	1	15	IgG3	0	FALSE	0	0.99	FALSE	1
712	587.262	15	IgG3		1	EEQYNSTFR	EEQYN[15.712]STFR	2	Y	2	1	15	IgG3	0	FALSE	0	0.99	FALSE	1
737	587.262	15	IgG3		1	EEQYNSTFR	EEQYN[15.737]STFR	2	Y	2	1	15	IgG3	0	FALSE	0	0.99	FALSE	1
762	587.262	15	IgG3		1	EEQYNSTFR	EEQYN[15.762]STFR	2	Y	2	1	15	IgG3	0	FALSE	0	0.99	FALSE	1
787	587.262	15	IgG3		1	EEQYNSTFR	EEQYN[15.787]STFR	2	Y	2	1	15	IgG3	0	FALSE	0	0.99	FALSE	1
812	587.262	15	IgG3		1	EEQYNSTFR	EEQYN[15.812]STFR	2	Y	2	1	15	IgG3	0	FALSE	0	0.99	FALSE	1
837	587.262	15	IgG3		1	EEQYNSTFR	EEQYN[15.837]STFR	2	Y	2	1	15	IgG3	0	FALSE	0	0.99	FALSE	1
862	587.262	15	IgG3		1	EEQYNSTFR	EEQYN[15.862]STFR	2	Y	2	1	15	IgG3	0	FALSE	0	0.99	FALSE	1
887	587.262	15	IgG3		1	EEQYNSTFR	EEQYN[15.887]STFR	2	Y	2	1	15	IgG3	0	FALSE	0	0.99	FALSE	1
912	587.262	15	IgG3		1	EEQYNSTFR	EEQYN[15.912]STFR	2	Y	2	1	15	IgG3	0	FALSE	0	0.99	FALSE	1
937	587.262	15	IgG3		1	EEQYNSTFR	EEQYN[15.937]STFR	2	Y	2	1	15	IgG3	0	FALSE	0	0.99	FALSE	1
962	587.262	15	IgG3		1	EEQYNSTFR	EEQYN[15.962]STFR	2	Y	2	1	15	IgG3	0	FALSE	0	0.99	FALSE	1
987	587.262	15	IgG3		1	EEQYNSTFR	EEQYN[15.987]STFR	2	Y	2	1	15	IgG3	0	FALSE	0	0.99	FALSE	1
1012	587.262	15	IgG3		1	EEQYNSTFR	EEQYN[15.1012]STFR	2	Y	2	1	15	IgG3	0	FALSE	0	0.99	FALSE	1
1037	587.262	15	IgG3		1	EEQYNSTFR	EEQYN[15.1037]STFR	2	Y	2	1	15	IgG3	0	FALSE	0	0.99	FALSE	1
1062	587.262	15	IgG3		1	EEQYNSTFR	EEQYN[15.1062]STFR	2	Y	2	1	15	IgG3	0	FALSE	0	0.99	FALSE	1
1087	587.262	15	IgG3		1	EEQYNSTFR	EEQYN[15.1087]STFR	2	Y	2	1	15	IgG3	0	FALSE	0	0.99	FALSE	1
1112	587.262	15	IgG3		1	EEQYNSTFR	EEQYN[15.1112]STFR	2	Y	2	1	15	IgG3	0	FALSE	0	0.99	FALSE	1
1137	587.262	15	IgG3		1	EEQYNSTFR	EEQYN[15.1137]STFR	2	Y	2	1	15	IgG3	0	FALSE	0	0.99	FALSE	1
1162	587.262	15	IgG3		1	EEQYNSTFR	EEQYN[15.1162]STFR	2	Y	2	1	15	IgG3	0	FALSE	0	0.99	FALSE	1
1187	587.262	15	IgG3		1	EEQYNSTFR	EEQYN[15.1187]STFR	2	Y	2	1	15	IgG3	0	FALSE	0	0.99	FALSE	1
1212	587.262	15	IgG3		1	EEQYNSTFR	EEQYN[15.1212]STFR	2	Y	2	1	15	IgG3	0	FALSE	0	0.99	FALSE	1
1237	587.262	15	IgG3		1	EEQYNSTFR	EEQYN[15.1237]STFR	2	Y	2	1	15	IgG3	0	FALSE	0	0.99	FALSE	1
412.5	1173.52	16	IgG3		1	EEQYNSTFR	EEQYN[16.412]STFR	2	Y	1	1	16	IgG3	0	FALSE	0	0.99	FALSE	1
437	1173.52	16	IgG3		1	EEQYNSTFR	EEQYN[16.437]STFR	2	Y	1	1	16	IgG3	0	FALSE	0	0.99	FALSE	1
462	1173.52	16	IgG3		1	EEQYNSTFR	EEQYN[16.462]STFR	2	Y	1	1	16	IgG3	0	FALSE	0	0.99	FALSE	1
487	1173.52	16	IgG3		1	EEQYNSTFR	EEQYN[16.487]STFR	2	Y	1	1	16	IgG3	0	FALSE	0	0.99	FALSE	1
512	1173.52	16	IgG3		1	EEQYNSTFR	EEQYN[16.512]STFR	2	Y	1	1	16	IgG3	0	FALSE	0	0.99	FALSE	1
537	1173.52	16	IgG3		1	EEQYNSTFR	EEQYN[16.537]STFR	2	Y	1	1	16	IgG3	0	FALSE	0	0.99	FALSE	1
562	1173.52	16	IgG3		1	EEQYNSTFR	EEQYN[16.562]STFR	2	Y	1	1	16	IgG3	0	FALSE	0	0.99	FALSE	1
587	1173.52	16	IgG3		1	EEQYNSTFR	EEQYN[16.587]STFR	2	Y	1	1	16	IgG3	0	FALSE	0	0.99	FALSE	1
612	1173.52	16	IgG3		1	EEQYNSTFR	EEQYN[16.612]STFR	2	Y	1	1	16	IgG3	0	FALSE	0	0.99	FALSE	1
637	1173.52	16	IgG3		1	EEQYNSTFR	EEQYN[16.637]STFR	2	Y	1	1	16	IgG3	0	FALSE	0	0.99	FALSE	1
662	1173.52	16	IgG3		1	EEQYNSTFR	EEQYN[16.662]STFR	2	Y	1	1	16	IgG3	0	FALSE	0	0.99	FALSE	1
687	1173.52	16	IgG3		1	EEQYNSTFR	EEQYN[16.687]STFR	2	Y	1	1	16	IgG3	0	FALSE	0	0.99	FALSE	1
712	1173.52	16	IgG3		1	EEQYNSTFR	EEQYN[16.712]STFR	2	Y	1	1	16	IgG3	0	FALSE	0	0.99	FALSE	1
737	1173.52	16	IgG3		1	EEQYNSTFR	EEQYN[16.737]STFR	2	Y	1	1	16	IgG3	0	FALSE	0	0.99	FALSE	1
762	1173.52	16	IgG3		1	EEQYNSTFR	EEQYN[16.762]STFR	2	Y	1	1	16	IgG3	0	FALSE	0	0.99	FALSE	1
787	1173.52	16	IgG3		1	EEQYNSTFR	EEQYN[16.787]STFR	2	Y	1	1	16	IgG3	0	FALSE	0	0.99	FALSE	1
812	1173.52	16	IgG3		1	EEQYNSTFR	EEQYN[16.812]STFR	2	Y	1	1	16	IgG3	0	FALSE	0	0.99	FALSE	1
837	1173.52	16	IgG3		1	EEQYNSTFR	EEQYN[16.837]STFR	2	Y	1	1	16	IgG3	0	FALSE	0	0.99	FALSE	1
862	1173.52	16	IgG3		1	EEQYNSTFR	EEQYN[16.862]STFR	2	Y	1	1	16	IgG3	0	FALSE	0	0.99	FALSE	1
887	1173.52	16	IgG3		1	EEQYNSTFR	EEQYN[16.887]STFR	2	Y	1	1	16	IgG3	0	FALSE	0	0.99	FALSE	1
912	1173.52	16	IgG3		1	EEQYNSTFR	EEQYN[16.912]STFR	2	Y	1	1	16	IgG3	0	FALSE	0	0.99	FALSE	1
937	1173.52	16	IgG3		1	EEQYNSTFR	EEQYN[16.937]STFR	2	Y	1	1	16	IgG3	0	FALSE	0	0.99	FALSE	1
962	1173.52	16	IgG3		1	EEQYNSTFR	EEQYN[16.962]STFR	2	Y	1	1	16	IgG3	0	FALSE	0	0.99	FALSE	1
987	1173.52	16	IgG3		1	EEQYNSTFR	EEQYN[16.987]STFR	2	Y	1	1	16	IgG3	0	FALSE	0	0.99	FALSE	1
1012	1173.52	16	IgG3		1	EEQYNSTFR	EEQYN[16.1012]STFR	2	Y	1	1	16	IgG3	0	FALSE	0	0.99	FALSE	1
1037	1173.52	16	IgG3		1	EEQYNSTFR	EEQYN[16.1037]STFR	2	Y	1	1	16	IgG3	0	FALSE	0	0.99	FALSE	1
1062	1173.52	16	IgG3		1	EEQYNSTFR	EEQYN[16.1062]STFR	2	Y	1	1	16	IgG3	0	FALSE	0	0.99	FALSE	1
1087	1173.52	16	IgG3		1	EEQYNSTFR	EEQYN[16.1087]STFR	2	Y	1	1	16	IgG3	0	FALSE	0	0.99	FALSE	1
1112	1173.52	16	IgG3		1	EEQYNSTFR	EEQYN[16.1112]STFR	2	Y	1	1	16	IgG3	0	FALSE	0	0.99	FALSE	1
1137	1173.52	16	IgG3		1	EEQYNSTFR	EEQYN[16.1137]STFR	2	Y	1	1	16	IgG3	0	FALSE	0	0.99	FALSE	1
1162	1173.52	16	IgG3		1	EEQYNSTFR	EEQYN[16.1162]STFR	2	Y	1	1	16	IgG3	0	FALSE	0	0.99	FALSE	1
1187	1173.52	16	IgG3		1	EEQYNSTFR	EEQYN[16.1187]STFR	2	Y	1	1	16	IgG3	0	FALSE	0	0.99	FALSE	1
1212	1173.52	16	IgG3		1	EEQYNSTFR	EEQYN[16.1212]STFR	2	Y	1	1	16	IgG3	0	FALSE	0	0.99	FALSE	1
1237	1173.52	16	IgG3		1	EEQYNSTFR	EEQYN[16.1237]STFR	2	Y	1	1	16	IgG3	0	FALSE	0	0.99	FALSE	1
412.5	587.262	16	IgG3		1	EEQYNSTFR	EEQYN[16.412]STFR	2	Y	2	1	16	IgG3	0	FALSE	0	0.99	FALSE	1
437	587.262	16	IgG3		1	EEQYNSTFR	EEQYN[16.437]STFR	2	Y	2	1	16	IgG3	0	FALSE	0	0.99	FALSE	1
462	587.262	16	IgG3		1	EEQYNSTFR	EEQYN[16.462]STFR	2	Y	2	1	16	IgG3	0	FALSE	0	0.99	FALSE	1
487	587.262	16	IgG3		1	EEQYNSTFR	EEQYN[16.487]STFR	2	Y	2	1	16	IgG3	0	FALSE	0	0.99	FALSE	1
512	587.262	16	IgG3		1	EEQYNSTFR	EEQYN[16.512]STFR	2	Y	2	1	16	IgG3	0	FALSE	0	0.99	FALSE	1
537	587.262	16	IgG3		1	EEQYNSTFR	EEQYN[16.537]STFR	2	Y	2	1	16	IgG3	0	FALSE	0	0.99	FALSE	1
562	587.262	16	IgG3		1	EEQYNSTFR	EEQYN[16.562]STFR	2	Y	2	1	16	IgG3	0	FALSE	0	0.99	FALSE	1
587	587.262	16	IgG3		1	EEQYNSTFR	EEQYN[16.587]STFR	2	Y	2	1	16	IgG3	0	FALSE	0	0.99	FALSE	1
612	587.262	16	IgG3		1	EEQYNSTFR	EEQYN[16.612]STFR	2	Y	2	1	16	IgG3	0	FALSE	0	0.99	FALSE	1
637	587.262	16	IgG3		1	EEQYNSTFR	EEQYN[16.637]STFR	2	Y	2	1	16	IgG3	0	FALSE	0	0.99	FALSE	1
662	587.262	16	IgG3		1	EEQYNSTFR	EEQYN[16.662]STFR	2	Y	2	1	16	IgG3	0	FALSE	0	0.99	FALSE	1
687	587.262	16	IgG3		1	EEQYNSTFR	EEQYN[16.687]STFR	2	Y	2	1	16	IgG3	0	FALSE	0	0.99	FALSE	1
712	587.262	16	IgG3		1	EEQYNSTFR	EEQYN[16.712]STFR	2	Y	2	1	16	IgG3	0	FALSE	0	0.99	FALSE	1
737	587.262	16	IgG3		1	EEQYNSTFR	EEQYN[16.737]STFR	2	Y	2	1	16	IgG3	0	FALSE	0	0.99	FALSE	1
762	587.262	16	IgG3		1	EEQYNSTFR	EEQYN[16.762]STFR	2	Y	2	1	16	IgG3	0	FALSE	0	0.99	FALSE	1
787	587.262	16	IgG3		1	EEQYNSTFR	EEQYN[16.787]STFR	2	Y	2	1	16	IgG3	0	FALSE	0	0.99	FALSE	1
812	587.262	16	IgG3		1	EEQYNSTFR	EEQYN[16.812]STFR	2	Y	2	1	16	IgG3	0	FALSE	0	0.99	FALSE	1
837	587.262	16	IgG3		1	EEQYNSTFR	EEQYN[16.837]STFR	2	Y	2	1	16	IgG3	0	FALSE	0	0.99	FALSE	1
862	587.262	16	IgG3		1	EEQYNSTFR	EEQYN[16.862]STFR	2	Y	2	1	16	IgG3	0	FALSE	0	0.99	FALSE	1
887	587.262	16	IgG3		1	EEQYNSTFR	EEQYN[16.887]STFR	2	Y	2	1	16	IgG3	0	FALSE	0	0.99	FALSE	1
912	587.262	16	IgG3		1	EEQYNSTFR	EEQYN[16.912]STFR	2	Y	2	1	16	IgG3	0	FALSE	0	0.99	FALSE	1
937	587.262	16	IgG3		1	EEQYNSTFR	EEQYN[16.937]STFR	2	Y	2	1	16	IgG3	0	FALSE	0	0.99	FALSE	1
962	587.262	16	IgG3		1	EEQYNSTFR	EEQYN[16.962]STFR	2	Y	2	1	16	IgG3	0	FALSE	0	0.99	FALSE	1
987	587.262	16	IgG3		1	EEQYNSTFR	EEQYN[16.987]STFR	2	Y	2	1	16	IgG3	0	FALSE	0	0.99	FALSE	1
1012	587.262	16	IgG3		1	EEQYNSTFR	EEQYN[16.1012]STFR	2	Y	2	1	16	IgG3	0	FALSE	0	0.99	FALSE	1
1037	587.262	16	IgG3		1	EEQYNSTFR	EEQYN[16.1037]STFR	2	Y	2	1	16	IgG3	0	FALSE	0	0.99	FALSE	1
1062	587.262	16	IgG3		1	EEQYNSTFR	EEQYN[16.1062]STFR	2	Y	2	1	16	IgG3	0	FALSE	0	0.99	FALSE	1
1087	587.262	16	IgG3		1	EEQYNSTFR	EEQYN[16.1087]STFR	2	Y	2	1	16	IgG3	0	FALSE	0	0.99	FALSE	1
1112	587.262	16	IgG3		1	EEQYNSTFR	EEQYN[16.1112]STFR	2	Y	2	1	16	IgG3	0	FALSE	0	0.99	FALSE	1
1137	587.262	16	IgG3		1	EEQYNSTFR	EEQYN[16.1137]STFR	2	Y	2	1	16	IgG3	0	FALSE	0	0.99	FALSE	1
1162	587.262	16	IgG3		1	EEQYNSTFR	EEQYN[16.1162]STFR	2	Y	2	1	16	IgG3	0	FALSE	0	0.99	FALSE	1
1187	587.262	16	IgG3		1	EEQYNSTFR	EEQYN[16.1187]STFR	2	Y	2	1	16	IgG3	0	FALSE	0	0.99	FALSE	1
1212	587.262	16	IgG3		1	EEQYNSTFR	EEQYN[16.1212]STFR	2	Y	2	1	16	IgG3	0	FALSE	0	0.99	FALSE	1
1237	587.262	16	IgG3		1	EEQYNSTFR	EEQYN[16.1237]STFR	2	Y	2	1	16	IgG3	0	FALSE	0	0.99	FALSE	1
412.5	1173.52	17	IgG3		1	EEQYNSTFR	EEQYN[17.412]STFR	2	Y	1	1	17	IgG3	0	FALSE	0	0.99	FALSE	1
437	1173.52	17	IgG3		1	EEQYNSTFR	EEQYN[17.437]STFR	2	Y	1	1	17	IgG3	0	FALSE	0	0.99	FALSE	1
462	1173.52	17	IgG3		1	EEQYNSTFR	EEQYN[17.462]STFR	2	Y	1	1	17	IgG3	0	FALSE	0	0.99	FALSE	1
487	1173.52	17	IgG3		1	EEQYNSTFR	EEQYN[17.487]STFR	2	Y	1	1	17	IgG3	0	FALSE	0	0.99	FALSE	1
512	1173.52	17	IgG3		1	EEQYNSTFR	EEQYN[17.512]STFR	2	Y	1	1	17	IgG3	0	FALSE	0	0.99	FALSE	1
537	1173.52	17	IgG3		1	EEQYNSTFR	EEQYN[17.537]STFR	2	Y	1	1	17	IgG3	0	FALSE	0	0.99	FALSE	1
562	1173.52	17	IgG3		1	EEQYNSTFR	EEQYN[17.562]STFR	2	Y	1	1	17	IgG3	0	FALSE	0	0.99	FALSE	1
587	1173.52	17	IgG3		1	EEQYNSTFR	EEQYN[17.587]STFR	2	Y	1	1	17	IgG3	0	FALSE	0	0.99	FALSE	1
612	1173.52	17	IgG3		1	EEQYNSTFR	EEQYN[17.612]STFR	2	Y	1	1	17	IgG3	0	FALSE	0	0.99	FALSE	1
637	1173.52	17	IgG3		1	EEQYNSTFR	EEQYN[17.637]STFR	2	Y	1	1	17	IgG3	0	FALSE	0	0.99	FALSE	1
662	1173.52	17	IgG3		1	EEQYNSTFR	EEQYN[17.662]STFR	2	Y	1	1	17	IgG3	0	FALSE	0	0.99	FALSE	1
687	1173.52	17	IgG3		1	EEQYNSTFR	EEQYN[17.687]STFR	2	Y	1	1	17	IgG3	0	FALSE	0	0.99	FALSE	1
712	1173.52	17	IgG3		1	EEQYNSTFR	EEQYN[17.712]STFR	2	Y	1	1	17	IgG3	0	FALSE	0	0.99	FALSE	1
737	1173.52	17	IgG3		1	EEQYNSTFR	EEQYN[17.737]STFR	2	Y	1	1	17	IgG3	0	FALSE	0	0.99	FALSE	1
762	1173.52	17	IgG3		1	EEQYNSTFR	EEQYN[17.762]STFR	2	Y	1	1	17	IgG3	0	FALSE	0	0.99	FALSE	1
787	1173.52	17	IgG3		1	EEQYNSTFR	EEQYN[17.787]STFR	2	Y	1	1	17	IgG3	0	FALSE	0	0.99	FALSE	1
812	1173.52	17	IgG3		1	EEQYNSTFR	EEQYN[17.812]STFR	2	Y	1	1	17	IgG3	0	FALSE	0	0.99	FALSE	1
837	1173.52	17	IgG3		1	EEQYNSTFR	EEQYN[17.837]STFR	2	Y	1	1	17	IgG3	0	FALSE	0	0.99	FALSE	1
862	1173.52	17	IgG3		1	EEQYNSTFR	EEQYN[17.862]STFR	2	Y	1	1	17	IgG3	0	FALSE	0	0.99	FALSE	1
887	1173.52	17	IgG3		1	EEQYNSTFR	EEQYN[17.887]STFR	2	Y	1	1	17	IgG3	0	FALSE	0	0.99	FALSE	1
912	1173.52	17	IgG3		1	EEQYNSTFR	EEQYN[17.912]STFR	2	Y	1	1	17	IgG3	0	FALSE	0	0.99	FALSE	1
937	1173.52	17	IgG3		1	EEQYNSTFR	EEQYN[17.937]STFR	2	Y	1	1	17	IgG3	0	FALSE	0	0.99	FALSE	1
962	1173.52	17	IgG3		1	EEQYNSTFR	EEQYN[17.962]STFR	2	Y	1	1	17	IgG3	0	FALSE	0	0.99	FALSE	1
987	1173.52	17	IgG3		1	EEQYNSTFR	EEQYN[17.987]STFR	2	Y	1	1	17	IgG3	0	FALSE	0	0.99	FALSE	1
1012	1173.52	17	IgG3		1	EEQYNSTFR	EEQYN[17.1012]STFR	2	Y	1	1	17	IgG3	0	FALSE	0	0.99	FALSE	1
1037	1173.52	17	IgG3		1	EEQYNSTFR	EEQYN[17.1037]STFR	2	Y	1	1	17	IgG3	0	FALSE	0	0.99	FALSE	1
1062	1173.52	17	IgG3		1	EEQYNSTFR	EEQYN[17.1062]STFR	2	Y	1	1	17	IgG3	0	FALSE	0	0.99	FALSE	1
1087	1173.52	17	IgG3		1	EEQYNSTFR	EEQYN[17.1087]STFR	2	Y	1	1	17	IgG3	0	FALSE	0	0.99	FALSE	1
1112	1173.52	17	IgG3		1	EEQYNSTFR	EEQYN[17.1112]STFR	2	Y	1	1	17	IgG3	0	FALSE	0	0.99	FALSE	1
1137	1173.52	17	IgG3		1	EEQYNSTFR	EEQYN[17.1137]STFR	2	Y	1	1	17	IgG3	0	FALSE	0	0.99	FALSE	1
1162	1173.52	17	IgG3		1	EEQYNSTFR	EEQYN[17.1162]STFR	2	Y	1	1	17	IgG3	0	FALSE	0	0.99	FALSE	1
1187	1173.52	17	IgG3		1	EEQYNSTFR	EEQYN[17.1187]STFR	2	Y	1	1	17	IgG3	0	FALSE	0	0.99	FALSE	1
1212	1173.52	17	IgG3		1	EEQYNSTFR	EEQYN[17.1212]STFR	2	Y	1	1	17	IgG3	0	FALSE	0	0.99	FALSE	1
1237	1173.52	17	IgG3		1	EEQYNSTFR	EEQYN[17.1237]STFR	2	Y	1	1	17	IgG3	0	FALSE	0	0.99	FALSE	1
412.5	587.262	17	IgG3		1	EEQYNSTFR	EEQYN[17.412]STFR	2	Y	2	1	17	IgG3	0	FALSE	0	0.99	FALSE	1
437	587.262	17	IgG3		1	EEQYNSTFR	EEQYN[17.437]STFR	2	Y	2	1	17	IgG3	0	FALSE	0	0.99	FALSE	1
462	587.262	17	IgG3		1	EEQYNSTFR	EEQYN[17.462]STFR	2	Y	2	1	17	IgG3	0	FALSE	0	0.99	FALSE	1
487	587.262	17	IgG3		1	EEQYNSTFR	EEQYN[17.487]STFR	2	Y	2	1	17	IgG3	0	FALSE	0	0.99	FALSE	1
512	587.262	17	IgG3		1	EEQYNSTFR	EEQYN[17.512]STFR	2	Y	2	1	17	IgG3	0	FALSE	0	0.99	FALSE	1
537	587.262	17	IgG3		1	EEQYNSTFR	EEQYN[17.537]STFR	2	Y	2	1	17	IgG3	0	FALSE	0	0.99	FALSE	1
562	587.262	17	IgG3		1	EEQYNSTFR	EEQYN[17.562]STFR	2	Y	2	1	17	IgG3	0	FALSE	0	0.99	FALSE	1
587	587.262	17	IgG3		1	EEQYNSTFR	EEQYN[17.587]STFR	2	Y	2	1	17	IgG3	0	FALSE	0	0.99	FALSE	1
612	587.262	17	IgG3		1	EEQYNSTFR	EEQYN[17.612]STFR	2	Y	2	1	17	IgG3	0	FALSE	0	0.99	FALSE	1
637	587.262	17	IgG3		1	EEQYNSTFR	EEQYN[17.637]STFR	2	Y	2	1	17	IgG3	0	FALSE	0	0.99	FALSE	1
662	587.262	17	IgG3		1	EEQYNSTFR	EEQYN[17.662]STFR	2	Y	2	1	17	IgG3	0	FALSE	0	0.99	FALSE	1
687	587.262	17	IgG3		1	EEQYNSTFR	EEQYN[17.687]STFR	2	Y	2	1	17	IgG3	0	FALSE	0	0.99	FALSE	1
712	587.262	17	IgG3		1	EEQYNSTFR	EEQYN[17.712]STFR	2	Y	2	1	17	IgG3	0	FALSE	0	0.99	FALSE	1
737	587.262	17	IgG3		1	EEQYNSTFR	EEQYN[17.737]STFR	2	Y	2	1	17	IgG3	0	FALSE	0	0.99	FALSE	1
762	587.262	17	IgG3		1	EEQYNSTFR	EEQYN[17.762]STFR	2	Y	2	1	17	IgG3	0	FALSE	0	0.99	FALSE	1
787	587.262	17	IgG3		1	EEQYNSTFR	EEQYN[17.787]STFR	2	Y	2	1	17	IgG3	0	FALSE	0	0.99	FALSE	1
812	587.262	17	IgG3		1	EEQYNSTFR	EEQYN[17.812]STFR	2	Y	2	1	17	IgG3	0	FALSE	0	0.99	FALSE	1
837	587.262	17	IgG3		1	EEQYNSTFR	EEQYN[17.837]STFR	2	Y	2	1	17	IgG3	0	FALSE	0	0.99	FALSE	1
862	587.262	17	IgG3		1	EEQYNSTFR	EEQYN[17.862]STFR	2	Y	2	1	17	IgG3	0	FALSE	0	0.99	FALSE	1
887	587.262	17	IgG3		1	EEQYNSTFR	EEQYN[17.887]STFR	2	Y	2	1	17	IgG3	0	FALSE	0	0.99	FALSE	1
912	587.262	17	IgG3		1	EEQYNSTFR	EEQYN[17.912]STFR	2	Y	2	1	17	IgG3	0	FALSE	0	0.99	FALSE	1
937	587.262	17	IgG3		1	EEQYNSTFR	EEQYN[17.937]STFR	2	Y	2	1	17	IgG3	0	FALSE	0	0.99	FALSE	1
962	587.262	17	IgG3		1	EEQYNSTFR	EEQYN[17.962]STFR	2	Y	2	1	17	IgG3	0	FALSE	0	0.99	FALSE	1
987	587.262	17	IgG3		1	EEQYNSTFR	EEQYN[17.987]STFR	2	Y	2	1	17	IgG3	0	FALSE	0	0.99	FALSE	1
1012	587.262	17	IgG3		1	EEQYNSTFR	EEQYN[17.1012]STFR	2	Y	2	1	17	IgG3	0	FALSE	0	0.99	FALSE	1
1037	587.262	17	IgG3		1	EEQYNSTFR	EEQYN[17.1037]STFR	2	Y	2	1	17	IgG3	0	FALSE	0	0.99	FALSE	1
1062	587.262	17	IgG3		1	EEQYNSTFR	EEQYN[17.1062]STFR	2	Y	2	1	17	IgG3	0	FALSE	0	0.99	FALSE	1
1087	587.262	17	IgG3		1	EEQYNSTFR	EEQYN[17.1087]STFR	2	Y	2	1	17	IgG3	0	FALSE	0	0.99	FALSE	1
1112	587.262	17	IgG3		1	EEQYNSTFR	EEQYN[17.1112]STFR	2	Y	2	1	17	IgG3	0	FALSE	0	0.99	FALSE	1
1137	587.262	17	IgG3		1	EEQYNSTFR	EEQYN[17.1137]STFR	2	Y	2	1	17	IgG3	0	FALSE	0	0.99	FALSE	1
1162	587.262	17	IgG3		1	EEQYNSTFR	EEQYN[17.1162]STFR	2	Y	2	1	17	IgG3	0	FALSE	0	0.99	FALSE	1
1187	587.262	17	IgG3		1	EEQYNSTFR	EEQYN[17.1187]STFR	2	Y	2	1	17	IgG3	0	FALSE	0	0.99	FALSE	1
1212	587.262	17	IgG3		1	EEQYNSTFR	EEQYN[17.1212]STFR	2	Y	2	1	17	IgG3	0	FALSE	0	0.99	FALSE	1
1237	587.262	17	IgG3		1	EEQYNSTFR	EEQYN[17.1237]STFR	2	Y	2	1	17	IgG3	0	FALSE	0	0.99	FALSE	1
412.5	1173.52	18	IgG3		1	EEQYNSTFR	EEQYN[18.412]STFR	2	Y	1	1	18	IgG3	0	FALSE	0	0.99	FALSE	1
437	1173.52	18	IgG3		1	EEQYNSTFR	EEQYN[18.437]STFR	2	Y	1	1	18	IgG3	0	FALSE	0	0.99	FALSE	1
462	1173.52	18	IgG3		1	EEQYNSTFR	EEQYN[18.462]STFR	2	Y	1	1	18	IgG3	0	FALSE	0	0.99	FALSE	1
487	1173.52	18	IgG3		1	EEQYNSTFR	EEQYN[18.487]STFR	2	Y	1	1	18	IgG3	0	FALSE	0	0.99	FALSE	1
512	1173.52	18	IgG3		1	EEQYNSTFR	EEQYN[18.512]STFR	2	Y	1	1	18	IgG3	0	FALSE	0	0.99	FALSE	1
537	1173.52	18	IgG3		1	EEQYNSTFR	EEQYN[18.537]STFR	2	Y	1	1	18	IgG3	0	FALSE	0	0.99	FALSE	1
562	1173.52	18	IgG3		1	EEQYNSTFR	EEQYN[18.562]STFR	2	Y	1	1	18	IgG3	0	FALSE	0	0.99	FALSE	1
587	1173.52	18	IgG3		1	EEQYNSTFR	EEQYN[18.587]STFR	2	Y	1	1	18	IgG3	0	FALSE	0	0.99	FALSE	1
612	1173.52	18	IgG3		1	EEQYNSTFR	EEQYN[18.612]STFR	2	Y	1	1	18	IgG3	0	FALSE	0	0.99	FALSE	1
637	1173.52	18	IgG3		1	EEQYNSTFR	EEQYN[18.637]STFR	2	Y	1	1	18	IgG3	0	FALSE	0	0.99	FALSE	1
662	1173.52	18	IgG3		1	EEQYNSTFR	EEQYN[18.662]STFR	2	Y	1	1	18	IgG3	0	FALSE	0	0.99	FALSE	1
687	1173.52	18	IgG3		1	EEQYNSTFR	EEQYN[18.687]STFR	2	Y	1	1	18	IgG3	0	FALSE	0	0.99	FALSE	1
712	1173.52	18	IgG3		1	EEQYNSTFR	EEQYN[18.712]STFR	2	Y	1	1	18	IgG3	0	FALSE	0	0.99	FALSE	1
737	1173.52	18	IgG3		1	EEQYNSTFR	EEQYN[18.737]STFR	2	Y	1	1	18	IgG3	0	FALSE	0	0.99	FALSE	1
762	1173.52	18	IgG3		1	EEQYNSTFR	EEQYN[18.762]STFR	2	Y	1	1	18	IgG3	0	FALSE	0	0.99	FALSE	1
787	1173.52	18	IgG3		1	EEQYNSTFR	EEQYN[18.787]STFR	2	Y	1	1	18	IgG3	0	FALSE	0	0.99	FALSE	1
812	1173.52	18	IgG3		1	EEQYNSTFR	EEQYN[18.812]STFR	2	Y	1	1	18	IgG3	0	FALSE	0	0.99	FALSE	1
837	1173.52	18	IgG3		1	EEQYNSTFR	EEQYN[18.837]STFR	2	Y	1	1	18	IgG3	0	FALSE	0	0.99	FALSE	1
862	1173.52	18	IgG3		1	EEQYNSTFR	EEQYN[18.862]STFR	2	Y	1	1	18	IgG3	0	FALSE	0	0.99	FALSE	1
887	1173.52	18	IgG3		1	EEQYNSTFR	EEQYN[18.887]STFR	2	Y	1	1	18	IgG3	0	FALSE	0	0.99	FALSE	1
912	1173.52	18	IgG3		1	EEQYNSTFR	EEQYN[18.912]STFR	2	Y	1	1	18	IgG3	0	FALSE	0	0.99	FALSE	1
937	1173.52	18	IgG3		1	EEQYNSTFR	EEQYN[18.937]STFR	2	Y	1	1	18	IgG3	0	FALSE	0	0.99	FALSE	1
962	1173.52	18	IgG3		1	EEQYNSTFR	EEQYN[18.962]STFR	2	Y	1	1	18	IgG3	0	FALSE	0	0.99	FALSE	1
987	1173.52	18	IgG3		1	EEQYNSTFR	EEQYN[18.987]STFR	2	Y	1	1	18	IgG3	0	FALSE	0	0.99	FALSE	1
1012	1173.52	18	IgG3		1	EEQYNSTFR	EEQYN[18.1012]STFR	2	Y	1	1	18	IgG3	0	FALSE	0	0.99	FALSE	1
1037	1173.52	18	IgG3		1	EEQYNSTFR	EEQYN[18.1037]STFR	2	Y	1	1	18	IgG3	0	FALSE	0	0.99	FALSE	1
1062	1173.52	18	IgG3		1	EEQYNSTFR	EEQYN[18.1062]STFR	2	Y	1	1	18	IgG3	0	FALSE	0	0.99	FALSE	1
1087	1173.52	18	IgG3		1	EEQYNSTFR	EEQYN[18.1087]STFR	2	Y	1	1	18	IgG3	0	FALSE	0	0.99	FALSE	1
1112	1173.52	18	IgG3		1	EEQYNSTFR	EEQYN[18.1112]STFR	2	Y	1	1	18	IgG3	0	FALSE	0	0.99	FALSE	1
1137	1173.52	18	IgG3		1	EEQYNSTFR	EEQYN[18.1137]STFR	2	Y	1	1	18	IgG3	0	FALSE	0	0.99	FALSE	1
1162	1173.52	18	IgG3		1	EEQYNSTFR	EEQYN[18.1162]STFR	2	Y	1	1	18	IgG3	0	FALSE	0	0.99	FALSE	1
1187	1173.52	18	IgG3		1	EEQYNSTFR	EEQYN[18.1187]STFR	2	Y	1	1	18	IgG3	0	FALSE	0	0.99	FALSE	1
1212	1173.52	18	IgG3		1	EEQYNSTFR	EEQYN[18.1212]STFR	2	Y	1	1	18	IgG3	0	FALSE	0	0.99	FALSE	1
1237	1173.52	18	IgG3		1	EEQYNSTFR	EEQYN[18.1237]STFR	2	Y	1	1	18	IgG3	0	FALSE	0	0.99	FALSE	1
412.5	587.262	18	IgG3		1	EEQYNSTFR	EEQYN[18.412]STFR	2	Y	2	1	18	IgG3	0	FALSE	0	0.99	FALSE	1
437	587.262	18	IgG3		1	EEQYNSTFR	EEQYN[18.437]STFR	2	Y	2	1	18	IgG3	0	FALSE	0	0.99	FALSE	1
462	587.262	18	IgG3		1	EEQYNSTFR	EEQYN[18.462]STFR	2	Y	2	1	18	IgG3	0	FALSE	0	0.99	FALSE	1
487	587.262	18	IgG3		1	EEQYNSTFR	EEQYN[18.487]STFR	2	Y	2	1	18	IgG3	0	FALSE	0	0.99	FALSE	1
512	587.262	18	IgG3		1	EEQYNSTFR	EEQYN[18.512]STFR	2	Y	2	1	18	IgG3	0	FALSE	0	0.99	FALSE	1
537	587.262	18	IgG3		1	EEQYNSTFR	EEQYN[18.537]STFR	2	Y	2	1	18	IgG3	0	FALSE	0	0.99	FALSE	1
562	587.262	18	IgG3		1	EEQYNSTFR	EEQYN[18.562]STFR	2	Y	2	1	18	IgG3	0	FALSE	0	0.99	FALSE	1
587	587.262	18	IgG3		1	EEQYNSTFR	EEQYN[18.587]STFR	2	Y	2	1	18	IgG3	0	FALSE	0	0.99	FALSE	1
612	587.262	18	IgG3		1	EEQYNSTFR	EEQYN[18.612]STFR	2	Y	2	1	18	IgG3	0	FALSE	0	0.99	FALSE	1
637	587.262	18	IgG3		1	EEQYNSTFR	EEQYN[18.637]STFR	2	Y	2	1	18	IgG3	0	FALSE	0	0.99	FALSE	1
662	587.262	18	IgG3		1	EEQYNSTFR	EEQYN[18.662]STFR	2	Y	2	1	18	IgG3	0	FALSE	0	0.99	FALSE	1
687	587.262	18	IgG3		1	EEQYNSTFR	EEQYN[18.687]STFR	2	Y	2	1	18	IgG3	0	FALSE	0	0.99	FALSE	1
712	587.262	18	IgG3		1	EEQYNSTFR	EEQYN[18.712]STFR	2	Y	2	1	18	IgG3	0	FALSE	0	0.99	FALSE	1
737	587.262	18	IgG3		1	EEQYNSTFR	EEQYN[18.737]STFR	2	Y	2	1	18	IgG3	0	FALSE	0	0.99	FALSE	1
762	587.262	18	IgG3		1	EEQYNSTFR	EEQYN[18.762]STFR	2	Y	2	1	18	IgG3	0	FALSE	0	0.99	FALSE	1
787	587.262	18	IgG3		1	EEQYNSTFR	EEQYN[18.787]STFR	2	Y	2	1	18	IgG3	0	FALSE	0	0.99	FALSE	1
812	587.262	18	IgG3		1	EEQYNSTFR	EEQYN[18.812]STFR	2	Y	2	1	18	IgG3	0	FALSE	0	0.99	FALSE	1
837	587.262	18	IgG3		1	EEQYNSTFR	EEQYN[18.837]STFR	2	Y	2	1	18	IgG3	0	FALSE	0	0.99	FALSE	1
862	587.262	18	IgG3		1	EEQYNSTFR	EEQYN[18.862]STFR	2	Y	2	1	18	IgG3	0	FALSE	0	0.99	FALSE	1
887	587.262	18	IgG3		1	EEQYNSTFR	EEQYN[18.887]STFR	2	Y	2	1	18	IgG3	0	FALSE	0	0.99	FALSE	1
912	587.262	18	IgG3		1	EEQYNSTFR	EEQYN[18.912]STFR	2	Y	2	1	18	IgG3	0	FALSE	0	0.99	FALSE	1
937	587.262	18	IgG3		1	EEQYNSTFR	EEQYN[18.937]STFR	2	Y	2	1	18	IgG3	0	FALSE	0	0.99	FALSE	1
962	587.262	18	IgG3		1	EEQYNSTFR	EEQYN[18.962]STFR	2	Y	2	1	18	IgG3	0	FALSE	0	0.99	FALSE	1
987	587.262	18	IgG3		1	EEQYNSTFR	EEQYN[18.987]STFR	2	Y	2	1	18	IgG3	0	FALSE	0	0.99	FALSE	1
1012	587.262	18	IgG3		1	EEQYNSTFR	EEQYN[18.1012]STFR	2	Y	2	1	18	IgG3	0	FALSE	0	0.99	FALSE	1
1037	587.262	18	IgG3		1	EEQYNSTFR	EEQYN[18.1037]STFR	2	Y	2	1	18	IgG3	0	FALSE	0	0.99	FALSE	1
1062	587.262	18	IgG3		1	EEQYNSTFR	EEQYN[18.1062]STFR	2	Y	2	1	18	IgG3	0	FALSE	0	0.99	FALSE	1
1087	587.262	18	IgG3		1	EEQYNSTFR	EEQYN[18.1087]STFR	2	Y	2	1	18	IgG3	0	FALSE	0	0.99	FALSE	1
1112	587.262	18	IgG3		1	EEQYNSTFR	EEQYN[18.1112]STFR	2	Y	2	1	18	IgG3	0	FALSE	0	0.99	FALSE	1
1137	587.262	18	IgG3		1	EEQYNSTFR	EEQYN[18.1137]STFR	2	Y	2	1	18	IgG3	0	FALSE	0	0.99	FALSE	1
1162	587.262	18	IgG3		1	EEQYNSTFR	EEQYN[18.1162]STFR	2	Y	2	1	18	IgG3	0	FALSE	0	0.99	FALSE	1
1187	587.262	18	IgG3		1	EEQYNSTFR	EEQYN[18.1187]STFR	2	Y	2	1	18	IgG3	0	FALSE	0	0.99	FALSE	1
1212	587.262	18	IgG3		1	EEQYNSTFR	EEQYN[18.1212]STFR	2	Y	2	1	18	IgG3	0	FALSE	0	0.99	FALSE	1
1237	587.262	18	IgG3		1	EEQYNSTFR	EEQYN[18.1237]STFR	2	Y	2	1	18	IgG3	0	FALSE	0	0.99	FALSE	1
412.5	1173.52	19	IgG3		1	EEQYNSTFR	EEQYN[19.412]STFR	2	Y	1	1	19	IgG3	0	FALSE	0	0.99	FALSE	1
437	1173.52	19	IgG3		1	EEQYNSTFR	EEQYN[19.437]STFR	2	Y	1	1	19	IgG3	0	FALSE	0	0.99	FALSE	1
462	1173.52	19	IgG3		1	EEQYNSTFR	EEQYN[19.462]STFR	2	Y	1	1	19	IgG3	0	FALSE	0	0.99	FALSE	1
487	1173.52	19	IgG3		1	EEQYNSTFR	EEQYN[19.487]STFR	2	Y	1	1	19	IgG3	0	FALSE	0	0.99	FALSE	1
512	1173.52	19	IgG3		1	EEQYNSTFR	EEQYN[19.512]STFR	2	Y	1	1	19	IgG3	0	FALSE	0	0.99	FALSE	1
537	1173.52	19	IgG3		1	EEQYNSTFR	EEQYN[19.537]STFR	2	Y	1	1	19	IgG3	0	FALSE	0	0.99	FALSE	1
562	1173.52	19	IgG3		1	EEQYNSTFR	EEQYN[19.562]STFR	2	Y	1	1	19	IgG3	0	FALSE	0	0.99	FALSE	1
587	1173.52	19	IgG3		1	EEQYNSTFR	EEQYN[19.587]STFR	2	Y	1	1	19	IgG3	0	FALSE	0	0.99	FALSE	1
612	1173.52	19	IgG3		1	EEQYNSTFR	EEQYN[19.612]STFR	2	Y	1	1	19	IgG3	0	FALSE	0	0.99	FALSE	1
637	1173.52	19	IgG3		1	EEQYNSTFR	EEQYN[19.637]STFR	2	Y	1	1	19	IgG3	0	FALSE	0	0.99	FALSE	1
662	1173.52	19	IgG3		1	EEQYNSTFR	EEQYN[19.662]STFR	2	Y	1	1	19	IgG3	0	FALSE	0	0.99	FALSE	1
687	1173.52	19	IgG3		1	EEQYNSTFR	EEQYN[19.687]STFR	2	Y	1	1	19	IgG3	0	FALSE	0	0.99	FALSE	1
712	1173.52	19	IgG3		1	EEQYNSTFR	EEQYN[19.712]STFR	2	Y	1	1	19	IgG3	0	FALSE	0	0.99	FALSE	1
737	1173.52	19	IgG3		1	EEQYNSTFR	EEQYN[19.737]STFR	2	Y	1	1	19	IgG3	0	FALSE	0	0.99	FALSE	1
762	1173.52	19	IgG3		1	EEQYNSTFR	EEQYN[19.762]STFR	2	Y	1	1	19	IgG3	0	FALSE	0	0.99	FALSE	1
787	1173.52	19	IgG3		1	EEQYNSTFR	EEQYN[19.787]STFR	2	Y	1	1	19	IgG3	0	FALSE	0	0.99	FALSE	1
812	1173.52	19	IgG3		1	EEQYNSTFR	EEQYN[19.812]STFR	2	Y	1	1	19	IgG3	0	FALSE	0	0.99	FALSE	1
837	1173.52	19	IgG3		1	EEQYNSTFR	EEQYN[19.837]STFR	2	Y	1	1	19	IgG3	0	FALSE	0	0.99	FALSE	1
862	1173.52	19	IgG3		1	EEQYNSTFR	EEQYN[19.862]STFR	2	Y	1	1	19	IgG3	0	FALSE	0	0.99	FALSE	1
887	1173.52	19	IgG3		1	EEQYNSTFR	EEQYN[19.887]STFR	2	Y	1	1	19	IgG3	0	FALSE	0	0.99	FALSE	1
912	1173.52	19	IgG3		1	EEQYNSTFR	EEQYN[19.912]STFR	2	Y	1	1	19	IgG3	0	FALSE	0	0.99	FALSE	1
937	1173.52	19	IgG3		1	EEQYNSTFR	EEQYN[19.937]STFR	2	Y	1	1	19	IgG3	0	FALSE	0	0.99	FALSE	1
962	1173.52	19	IgG3		1	EEQYNSTFR	EEQYN[19.962]STFR	2	Y	1	1	19	IgG3	0	FALSE	0	0.99	FALSE	1
987	1173.52	19	IgG3		1	EEQYNSTFR	EEQYN[19.987]STFR	2	Y	1	1	19	IgG3	0	FALSE	0	0.99	FALSE	1
1012	1173.52	19	IgG3		1	EEQYNSTFR	EEQYN[19.1012]STFR	2	Y	1	1	19	IgG3	0	FALSE	0	0.99	FALSE	1
1037	1173.52	19	IgG3		1	EEQYNSTFR	EEQYN[19.1037]STFR	2	Y	1	1	19	IgG3	0	FALSE	0	0.99	FALSE	1
1062	1173.52	19	IgG3		1	EEQYNSTFR	EEQYN[19.1062]STFR	2	Y	1	1	19	IgG3	0	FALSE	0	0.99	FALSE	1
1087	1173.52	19	IgG3		1	EEQYNSTFR	EEQYN[19.1087]STFR	2	Y	1	1	19	IgG3	0	FALSE	0	0.99	FALSE	1
1112	1173.52	19	IgG3		1	EEQYNSTFR	EEQYN[19.1112]STFR	2	Y	1	1	19	IgG3	0	FALSE	0	0.99	FALSE	1
1137	1173.52	19	IgG3		1	EEQYNSTFR	EEQYN[19.1137]STFR	2	Y	1	1	19	IgG3	0	FALSE	0	0.99	FALSE	1
1162	1173.52	19	IgG3		1	EEQYNSTFR	EEQYN[19.1162]STFR	2	Y	1	1	19	IgG3	0	FALSE	0	0.99	FALSE	1
1187	1173.52	19	IgG3		1	EEQYNSTFR	EEQYN[19.1187]STFR	2	Y	1	1	19	IgG3	0	FALSE	0	0.99	FALSE	1
1212	1173.52	19	IgG3		1	EEQYNSTFR	EEQYN[19.1212]STFR	2	Y	1	1	19	IgG3	0	FALSE	0	0.99	FALSE	1
1237	1173.52	19	IgG3		1	EEQYNSTFR	EEQYN[19.1237]STFR	2	Y	1	1	19	IgG3	0	FALSE	0	0.99	FALSE	1
412.5	587.262	19	IgG3		1	EEQYNSTFR	EEQYN[19.412]STFR	2	Y	2	1	19	IgG3	0	FALSE	0	0.99	FALSE	1
437	587.262	19	IgG3		1	EEQYNSTFR	EEQYN[19.437]STFR	2	Y	2	1	19	IgG3	0	FALSE	0	0.99	FALSE	1
462	587.262	19	IgG3		1	EEQYNSTFR	EEQYN[19.462]STFR	2	Y	2	1	19	IgG3	0	FALSE	0	0.99	FALSE	1
487	587.262	19	IgG3		1	EEQYNSTFR	EEQYN[19.487]STFR	2	Y	2	1	19	IgG3	0	FALSE	0	0.99	FALSE	1
512	587.262	19	IgG3		1	EEQYNSTFR	EEQYN[19.512]STFR	2	Y	2	1	19	IgG3	0	FALSE	0	0.99	FALSE	1
537	587.262	19	IgG3		1	EEQYNSTFR	EEQYN[19.537]STFR	2	Y	2	1	19	IgG3	0	FALSE	0	0.99	FALSE	1
562	587.262	19	IgG3		1	EEQYNSTFR	EEQYN[19.562]STFR	2	Y	2	1	19	IgG3	0	FALSE	0	0.99	FALSE	1
587	587.262	19	IgG3		1	EEQYNSTFR	EEQYN[19.587]STFR	2	Y	2	1	19	IgG3	0	FALSE	0	0.99	FALSE	1
612	587.262	19	IgG3		1	EEQYNSTFR	EEQYN[19.612]STFR	2	Y	2	1	19	IgG3	0	FALSE	0	0.99	FALSE	1
637	587.262	19	IgG3		1	EEQYNSTFR	EEQYN[19.637]STFR	2	Y	2	1	19	IgG3	0	FALSE	0	0.99	FALSE	1
662	587.262	19	IgG3		1	EEQYNSTFR	EEQYN[19.662]STFR	2	Y	2	1	19	IgG3	0	FALSE	0	0.99	FALSE	1
687	587.262	19	IgG3		1	EEQYNSTFR	EEQYN[19.687]STFR	2	Y	2	1	19	IgG3	0	FALSE	0	0.99	FALSE	1
712	587.262	19	IgG3		1	EEQYNSTFR	EEQYN[19.712]STFR	2	Y	2	1	19	IgG3	0	FALSE	0	0.99	FALSE	1
737	587.262	19	IgG3		1	EEQYNSTFR	EEQYN[19.737]STFR	2	Y	2	1	19	IgG3	0	FALSE	0	0.99	FALSE	1
762	587.262	19	IgG3		1	EEQYNSTFR	EEQYN[19.762]STFR	2	Y	2	1	19	IgG3	0	FALSE	0	0.99	FALSE	1
787	587.262	19	IgG3		1	EEQYNSTFR	EEQYN[19.787]STFR	2	Y	2	1	19	IgG3	0	FALSE	0	0.99	FALSE	1
812	587.262	19	IgG3		1	EEQYNSTFR	EEQYN[19.812]STFR	2	Y	2	1	19	IgG3	0	FALSE	0	0.99	FALSE	1
837	587.262	19	IgG3		1	EEQYNSTFR	EEQYN[19.837]STFR	2	Y	2	1	19	IgG3	0	FALSE	0	0.99	FALSE	1
862	587.262	19	IgG3		1	EEQYNSTFR	EEQYN[19.862]STFR	2	Y	2	1	19	IgG3	0	FALSE	0	0.99	FALSE	1
887	587.262	19	IgG3		1	EEQYNSTFR	EEQYN[19.887]STFR	2	Y	2	1	19	IgG3	0	FALSE	0	0.99	FALSE	1
912	587.262	19	IgG3		1	EEQYNSTFR	EEQYN[19.912]STFR	2	Y	2	1	19	IgG3	0	FALSE	0	0.99	FALSE	1
937	587.262	19	IgG3		1	EEQYNSTFR	EEQYN[19.937]STFR	2	Y	2	1	19	IgG3	0	FALSE	0	0.99	FALSE	1
962	587.262	19	IgG3		1	EEQYNSTFR	EEQYN[19.962]STFR	2	Y	2	1	19	IgG3	0	FALSE	0	0.99	FALSE	1
987	587.262	19	IgG3		1	EEQYNSTFR	EEQYN[19.987]STFR	2	Y	2	1	19	IgG3	0	FALSE	0	0.99	FALSE	1
1012	587.262	19	IgG3		1	EEQYNSTFR	EEQYN[19.1012]STFR	2	Y	2	1	19	IgG3	0	FALSE	0	0.99	FALSE	1
1037	587.262	19	IgG3		1	EEQYNSTFR	EEQYN[19.1037]STFR	2	Y	2	1	19	IgG3	0	FALSE	0	0.99	FALSE	1
1062	587.262	19	IgG3		1	EEQYNSTFR	EEQYN[19.1062]STFR	2	Y	2	1	19	IgG3	0	FALSE	0	0.99	FALSE	1
1087	587.262	19	IgG3		1	EEQYNSTFR	EEQYN[19.1087]STFR	2	Y	2	1	19	IgG3	0	FALSE	0	0.99	FALSE	1
1112	587.262	19	IgG3		1	EEQYNSTFR	EEQYN[19.1112]STFR	2	Y	2	1	19	IgG3	0	FALSE	0	0.99	FALSE	1
1137	587.262	19	IgG3		1	EEQYNSTFR	EEQYN[19.1137]STFR	2	Y	2	1	19	IgG3	0	FALSE	0	0.99	FALSE	1
1162	587.262	19	IgG3		1	EEQYNSTFR	EEQYN[19.1162]STFR	2	Y	2	1	19	IgG3	0	FALSE	0	0.99	FALSE	1
1187	587.262	19	IgG3		1	EEQYNSTFR	EEQYN[19.1187]STFR	2	Y	2	1	19	IgG3	0	FALSE	0	0.99	FALSE	1
1212	587.262	19	IgG3		1	EEQYNSTFR	EEQYN[19.1212]STFR	2	Y	2	1	19	IgG3	0	FALSE	0	0.99	FALSE	1
1237	587.262	19	IgG3		1	EEQYNSTFR	EEQYN[19.1237]STFR	2	Y	2	1	19	IgG3	0	FALSE	0	0.99	FALSE	1
412.5	1173.52	20	IgG3		1	EEQYNSTFR	EEQYN[20.412]STFR	2	Y	1	1	20	IgG3	0	FALSE	0	0.99	FALSE	1
437	1173.52	20	IgG3		1	EEQYNSTFR	EEQYN[20.437]STFR	2	Y	1	1	20	IgG3	0	FALSE	0	0.99	FALSE	1
462	1173.52	20	IgG3		1	EEQYNSTFR	EEQYN[20.462]STFR	2	Y	1	1	20	IgG3	0	FALSE	0	0.99	FALSE	1
487	1173.52	20	IgG3		1	EEQYNSTFR	EEQYN[20.487]STFR	2	Y	1	1	20	IgG3	0	FALSE	0	0.99	FALSE	1
512	1173.52	20	IgG3		1	EEQYNSTFR	EEQYN[20.512]STFR	2	Y	1	1	20	IgG3	0	FALSE	0	0.99	FALSE	1
537	1173.52	20	IgG3		1	EEQYNSTFR	EEQYN[20.537]STFR	2	Y	1	1	20	IgG3	0	FALSE	0	0.99	FALSE	1
562	1173.52	20	IgG3		1	EEQYNSTFR	EEQYN[20.562]STFR	2	Y	1	1	20	IgG3	0	FALSE	0	0.99	FALSE	1
587	1173.52	20	IgG3		1	EEQYNSTFR	EEQYN[20.587]STFR	2	Y	1	1	20	IgG3	0	FALSE	0	0.99	FALSE	1
612	1173.52	20	IgG3		1	EEQYNSTFR	EEQYN[20.612]STFR	2	Y	1	1	20	IgG3	0	FALSE	0	0.99	FALSE	1
637	1173.52	20	IgG3		1	EEQYNSTFR	EEQYN[20.637]STFR	2	Y	1	1	20	IgG3	0	FALSE	0	0.99	FALSE	1
662	1173.52	20	IgG3		1	EEQYNSTFR	EEQYN[20.662]STFR	2	Y	1	1	20	IgG3	0	FALSE	0	0.99	FALSE	1
687	1173.52	20	IgG3		1	EEQYNSTFR	EEQYN[20.687]STFR	2	Y	1	1	20	IgG3	0	FALSE	0	0.99	FALSE	1
712	1173.52	20	IgG3		1	EEQYNSTFR	EEQYN[20.712]STFR	2	Y	1	1	20	IgG3	0	FALSE	0	0.99	FALSE	1
737	1173.52	20	IgG3		1	EEQYNSTFR	EEQYN[20.737]STFR	2	Y	1	1	20	IgG3	0	FALSE	0	0.99	FALSE	1
762	1173.52	20	IgG3		1	EEQYNSTFR	EEQYN[20.762]STFR	2	Y	1	1	20	IgG3	0	FALSE	0	0.99	FALSE	1
787	1173.52	20	IgG3		1	EEQYNSTFR	EEQYN[20.787]STFR	2	Y	1	1	20	IgG3	0	FALSE	0	0.99	FALSE	1
812	1173.52	20	IgG3		1	EEQYNSTFR	EEQYN[20.812]STFR	2	Y	1	1	20	IgG3	0	FALSE	0	0.99	FALSE	1
837	1173.52	20	IgG3		1	EEQYNSTFR	EEQYN[20.837]STFR	2	Y	1	1	20	IgG3	0	FALSE	0	0.99	FALSE	1
862	1173.52	20	IgG3		1	EEQYNSTFR	EEQYN[20.862]STFR	2	Y	1	1	20	IgG3	0	FALSE	0	0.99	FALSE	1
887	1173.52	20	IgG3		1	EEQYNSTFR	EEQYN[20.887]STFR	2	Y	1	1	20	IgG3	0	FALSE	0	0.99	FALSE	1
912	1173.52	20	IgG3		1	EEQYNSTFR	EEQYN[20.912]STFR	2	Y	1	1	20	IgG3	0	FALSE	0	0.99	FALSE	1
937	1173.52	20	IgG3		1	EEQYNSTFR	EEQYN[20.937]STFR	2	Y	1	1	20	IgG3	0	FALSE	0	0.99	FALSE	1
962	1173.52	20	IgG3		1	EEQYNSTFR	EEQYN[20.962]STFR	2	Y	1	1	20	IgG3	0	FALSE	0	0.99	FALSE	1
987	1173.52	20	IgG3		1	EEQYNSTFR	EEQYN[20.987]STFR	2	Y	1	1	20	IgG3	0	FALSE	0	0.99	FALSE	1
1012	1173.52	20	IgG3		1	EEQYNSTFR	EEQYN[20.1012]STFR	2	Y	1	1	20	IgG3	0	FALSE	0	0.99	FALSE	1
1037	1173.52	20	IgG3		1	EEQYNSTFR	EEQYN[20.1037]STFR	2	Y	1	1	20	IgG3	0	FALSE	0	0.99	FALSE	1
1062	1173.52	20	IgG3		1	EEQYNSTFR	EEQYN[20.1062]STFR	2	Y	1	1	20	IgG3	0	FALSE	0	0.99	FALSE	1
1087	1173.52	20	IgG3		1	EEQYNSTFR	EEQYN[20.1087]STFR	2	Y	1	1	20	IgG3	0	FALSE	0	0.99	FALSE	1
1112	1173.52	20	IgG3		1	EEQYNSTFR	EEQYN[20.1112]STFR	2	Y	1	1	20	IgG3	0	FALSE	0	0.99	FALSE	1
1137	1173.52	20	IgG3		1	EEQYNSTFR	EEQYN[20.1137]STFR	2	Y	1	1	20	IgG3	0	FALSE	0	0.99	FALSE	1
1162	1173.52	20	IgG3		1	EEQYNSTFR	EEQYN[20.1162]STFR	2	Y	1	1	20	IgG3	0	FALSE	0	0.99	FALSE	1
1187	1173.52	20	IgG3		1	EEQYNSTFR	EEQYN[20.1187]STFR	2	Y	1	1	20	IgG3	0	FALSE	0	0.99	FALSE	1
1212	1173.52	20	IgG3		1	EEQYNSTFR	EEQYN[20.1212]STFR	2	Y	1	1	20	IgG3	0	FALSE	0	0.99	FALSE	1
1237	1173.52	20	IgG3		1	EEQYNSTFR	EEQYN[20.1237]STFR	2	Y	1	1	20	IgG3	0	FALSE	0	0.99	FALSE	1
412.5	587.262	20	IgG3		1	EEQYNSTFR	EEQYN[20.412]STFR	2	Y	2	1	20	IgG3	0	FALSE	0	0.99	FALSE	1
437	587.262	20	IgG3		1	EEQYNSTFR	EEQYN[20.437]STFR	2	Y	2	1	20	IgG3	0	FALSE	0	0.99	FALSE	1
462	587.262	20	IgG3		1	EEQYNSTFR	EEQYN[20.462]STFR	2	Y	2	1	20	IgG3	0	FALSE	0	0.99	FALSE	1
487	587.262	20	IgG3		1	EEQYNSTFR	EEQYN[20.487]STFR	2	Y	2	1	20	IgG3	0	FALSE	0	0.99	FALSE	1
512	587.262	20	IgG3		1	EEQYNSTFR	EEQYN[20.512]STFR	2	Y	2	1	20	IgG3	0	FALSE	0	0.99	FALSE	1
537	587.262	20	IgG3		1	EEQYNSTFR	EEQYN[20.537]STFR	2	Y	2	1	20	IgG3	0	FALSE	0	0.99	FALSE	1
562	587.262	20	IgG3		1	EEQYNSTFR	EEQYN[20.562]STFR	2	Y	2	1	20	IgG3	0	FALSE	0	0.99	FALSE	1
587	587.262	20	IgG3		1	EEQYNSTFR	EEQYN[20.587]STFR	2	Y	2	1	20	IgG3	0	FALSE	0	0.99	FALSE	1
612	587.262	20	IgG3		1	EEQYNSTFR	EEQYN[20.612]STFR	2	Y	2	1	20	IgG3	0	FALSE	0	0.99	FALSE	1
637	587.262	20	IgG3		1	EEQYNSTFR	EEQYN[20.637]STFR	2	Y	2	1	20	IgG3	0	FALSE	0	0.99	FALSE	1
662	587.262	20	IgG3		1	EEQYNSTFR	EEQYN[20.662]STFR	2	Y	2	1	20	IgG3	0	FALSE	0	0.99	FALSE	1
687	587.262	20	IgG3		1	EEQYNSTFR	EEQYN[20.687]STFR	2	Y	2	1	20	IgG3	0	FALSE	0	0.99	FALSE	1
712	587.262	20	IgG3		1	EEQYNSTFR	EEQYN[20.712]STFR	2	Y	2	1	20	IgG3	0	FALSE	0	0.99	FALSE	1
737	587.262	20	IgG3		1	EEQYNSTFR	EEQYN[20.737]STFR	2	Y	2	1	20	IgG3	0	FALSE	0	0.99	FALSE	1
762	587.262	20	IgG3		1	EEQYNSTFR	EEQYN[20.762]STFR	2	Y	2	1	20	IgG3	0	FALSE	0	0.99	FALSE	1
787	587.262	20	IgG3		1	EEQYNSTFR	EEQYN[20.787]STFR	2	Y	2	1	20	IgG3	0	FALSE	0	0.99	FALSE	1
812	587.262	20	IgG3		1	EEQYNSTFR	EEQYN[20.812]STFR	2	Y	2	1	20	IgG3	0	FALSE	0	0.99	FALSE	1
837	587.262	20	IgG3		1	EEQYNSTFR	EEQYN[20.837]STFR	2	Y	2	1	20	IgG3	0	FALSE	0	0.99	FALSE	1
862	587.262	20	IgG3		1	EEQYNSTFR	EEQYN[20.862]STFR	2	Y	2	1	20	IgG3	0	FALSE	0	0.99	FALSE	1
887	587.262	20	IgG3		1	EEQYNSTFR	EEQYN[20.887]STFR	2	Y	2	1	20	IgG3	0	FALSE	0	0.99	FALSE	1
912	587.262	20	IgG3		1	EEQYNSTFR	EEQYN[20.912]STFR	2	Y	2	1	20	IgG3	0	FALSE	0	0.99	FALSE	1
937	587.262	20	IgG3		1	EEQYNSTFR	EEQYN[20.937]STFR	2	Y	2	1	20	IgG3	0	FALSE	0	0.99	FALSE	1
962	587.262	20	IgG3		1	EEQYNSTFR	EEQYN[20.962]STFR	2	Y	2	1	20	IgG3	0	FALSE	0	0.99	FALSE	1
987	587.262	20	IgG3		1	EEQYNSTFR	EEQYN[20.987]STFR	2	Y	2	1	20	IgG3	0	FALSE	0	0.99	FALSE	1
1012	587.262	20	IgG3		1	EEQYNSTFR	EEQYN[20.1012]STFR	2	Y	2	1	20	IgG3	0	FALSE	0	0.99	FALSE	1
1037	587.262	20	IgG3		1	EEQYNSTFR	EEQYN[20.1037]STFR	2	Y	2	1	20	IgG3	0	FALSE	0	0.99	FALSE	1
1062	587.262	20	IgG3		1	EEQYNSTFR	EEQYN[20.1062]STFR	2	Y	2	1	20	IgG3	0	FALSE	0	0.99	FALSE	1
1087	587.262	20	IgG3		1	EEQYNSTFR	EEQYN[20.1087]STFR	2	Y	2	1	20	IgG3	0	FALSE	0	0.99	FALSE	1
1112	587.262	20	IgG3		1	EEQYNSTFR	EEQYN[20.1112]STFR	2	Y	2	1	20	IgG3	0	FALSE	0	0.99	FALSE	1
1137	587.262	20	IgG3		1	EEQYNSTFR	EEQYN[20.1137]STFR	2	Y	2	1	20	IgG3	0	FALSE	0	0.99	FALSE	1
1162	587.262	20	IgG3		1	EEQYNSTFR	EEQYN[20.1162]STFR	2	Y	2	1	20	IgG3	0	FALSE	0	0.99	FALSE	1
1187	587.262	20	IgG3		1	EEQYNSTFR	EEQYN[20.1187]STFR	2	Y	2	1	20	IgG3	0	FALSE	0	0.99	FALSE	1
1212	587.262	20	IgG3		1	EEQYNSTFR	EEQYN[20.1212]STFR	2	Y	2	1	20	IgG3	0	FALSE	0	0.99	FALSE	1
1237	587.262	20	IgG3		1	EEQYNSTFR	EEQYN[20.1237]STFR	2	Y	2	1	20	IgG3	0	FALSE	0	0.99	FALSE	1
412.5	1173.52	21	IgG3		1	EEQYNSTFR	EEQYN[21.412]STFR	2	Y	1	1	21	IgG3	0	FALSE	0	0.99	FALSE	1
437	1173.52	21	IgG3		1	EEQYNSTFR	EEQYN[21.437]STFR	2	Y	1	1	21	IgG3	0	FALSE	0	0.99	FALSE	1
462	1173.52	21	IgG3		1	EEQYNSTFR	EEQYN[21.462]STFR	2	Y	1	1	21	IgG3	0	FALSE	0	0.99	FALSE	1
487	1173.52	21	IgG3		1	EEQYNSTFR	EEQYN[21.487]STFR	2	Y	1	1	21	IgG3	0	FALSE	0	0.99	FALSE	1
512	1173.52	21	IgG3		1	EEQYNSTFR	EEQYN[21.512]STFR	2	Y	1	1	21	IgG3	0	FALSE	0	0.99	FALSE	1
537	1173.52	21	IgG3		1	EEQYNSTFR	EEQYN[21.537]STFR	2	Y	1	1	21	IgG3	0	FALSE	0	0.99	FALSE	1
562	1173.52	21	IgG3		1	EEQYNSTFR	EEQYN[21.562]STFR	2	Y	1	1	21	IgG3	0	FALSE	0	0.99	FALSE	1
587	1173.52	21	IgG3		1	EEQYNSTFR	EEQYN[21.587]STFR	2	Y	1	1	21	IgG3	0	FALSE	0	0.99	FALSE	1
612	1173.52	21	IgG3		1	EEQYNSTFR	EEQYN[21.612]STFR	2	Y	1	1	21	IgG3	0	FALSE	0	0.99	FALSE	1
637	1173.52	21	IgG3		1	EEQYNSTFR	EEQYN[21.637]STFR	2	Y	1	1	21	IgG3	0	FALSE	0	0.99	FALSE	1
662	1173.52	21	IgG3		1	EEQYNSTFR	EEQYN[21.662]STFR	2	Y	1	1	21	IgG3	0	FALSE	0	0.99	FALSE	1
687	1173.52	21	IgG3		1	EEQYNSTFR	EEQYN[21.687]STFR	2	Y	1	1	21	IgG3	0	FALSE	0	0.99	FALSE	1
712	1173.52	21	IgG3		1	EEQYNSTFR	EEQYN[21.712]STFR	2	Y	1	1	21	IgG3	0	FALSE	0	0.99	FALSE	1
737	1173.52	21	IgG3		1	EEQYNSTFR	EEQYN[21.737]STFR	2	Y	1	1	21	IgG3	0	FALSE	0	0.99	FALSE	1
762	1173.52	21	IgG3		1	EEQYNSTFR	EEQYN[21.762]STFR	2	Y	1	1	21	IgG3	0	FALSE	0	0.99	FALSE	1
787	1173.52	21	IgG3		1	EEQYNSTFR	EEQYN[21.787]STFR	2	Y	1	1	21	IgG3	0	FALSE	0	0.99	FALSE	1
812	1173.52	21	IgG3		1	EEQYNSTFR	EEQYN[21.812]STFR	2	Y	1	1	21	IgG3	0	FALSE	0	0.99	FALSE	1
837	1173.52	21	IgG3		1	EEQYNSTFR	EEQYN[21.837]STFR	2	Y	1	1	21	IgG3	0	FALSE	0	0.99	FALSE	1
862	1173.52	21	IgG3		1	EEQYNSTFR	EEQYN[21.862]STFR	2	Y	1	1	21	IgG3	0	FALSE	0	0.99	FALSE	1
887	1173.52	21	IgG3		1	EEQYNSTFR	EEQYN[21.887]STFR	2	Y	1	1	21	IgG3	0	FALSE	0	0.99	FALSE	1
912	1173.52	21	IgG3		1	EEQYNSTFR	EEQYN[21.912]STFR	2	Y	1	1	21	IgG3	0	FALSE	0	0.99	FALSE	1
937	1173.52	21	IgG3		1	EEQYNSTFR	EEQYN[21.937]STFR	2	Y	1	1	21	IgG3	0	FALSE	0	0.99	FALSE	1
962	1173.52	21	IgG3		1	EEQYNSTFR	EEQYN[21.962]STFR	2	Y	1	1	21	IgG3	0	FALSE	0	0.99	FALSE	1
987	1173.52	21	IgG3		1	EEQYNSTFR	EEQYN[21.987]STFR	2	Y	1	1	21	IgG3	0	FALSE	0	0.99	FALSE	1
1012	1173.52	21	IgG3		1	EEQYNSTFR	EEQYN[21.1012]STFR	2	Y	1	1	21	IgG3	0	FALSE	0	0.99	FALSE	1
1037	1173.52	21	IgG3		1	EEQYNSTFR	EEQYN[21.1037]STFR	2	Y	1	1	21	IgG3	0	FALSE	0	0.99	FALSE	1
1062	1173.52	21	IgG3		1	EEQYNSTFR	EEQYN[21.1062]STFR	2	Y	1	1	21	IgG3	0	FALSE	0	0.99	FALSE	1
1087	1173.52	21	IgG3		1	EEQYNSTFR	EEQYN[21.1087]STFR	2	Y	1	1	21	IgG3	0	FALSE	0	0.99	FALSE	1
1112	1173.52	21	IgG3		1	EEQYNSTFR	EEQYN[21.1112]STFR	2	Y	1	1	21	IgG3	0	FALSE	0	0.99	FALSE	1
1137	1173.52	21	IgG3		1	EEQYNSTFR	EEQYN[21.1137]STFR	2	Y	1	1	21	IgG3	0	FALSE	0	0.99	FALSE	1
1162	1173.52	21	IgG3		1	EEQYNSTFR	EEQYN[21.1162]STFR	2	Y	1	1	21	IgG3	0	FALSE	0	0.99	FALSE	1
1187	1173.52	21	IgG3		1	EEQYNSTFR	EEQYN[21.1187]STFR	2	Y	1	1	21	IgG3	0	FALSE	0	0.99	FALSE	1
1212	1173.52	21	IgG3		1	EEQYNSTFR	EEQYN[21.1212]STFR	2	Y	1	1	21	IgG3	0	FALSE	0	0.99	FALSE	1
1237	1173.52	21	IgG3		1	EEQYNSTFR	EEQYN[21.1237]STFR	2	Y	1	1	21	IgG3	0	FALSE	0	0.99	FALSE	1
412.5	587.262	21	IgG3		1	EEQYNSTFR	EEQYN[21.412]STFR	2	Y	2	1	21	IgG3	0	FALSE	0	0.99	FALSE	1
437	587.262	21	IgG3		1	EEQYNSTFR	EEQYN[21.437]STFR	2	Y	2	1	21	IgG3	0	FALSE	0	0.99	FALSE	1
462	587.262	21	IgG3		1	EEQYNSTFR	EEQYN[21.462]STFR	2	Y	2	1	21	IgG3	0	FALSE	0	0.99	FALSE	1
487	587.262	21	IgG3		1	EEQYNSTFR	EEQYN[21.487]STFR	2	Y	2	1	21	IgG3	0	FALSE	0	0.99	FALSE	1
512	587.262	21	IgG3		1	EEQYNSTFR	EEQYN[21.512]STFR	2	Y	2	1	21	IgG3	0	FALSE	0	0.99	FALSE	1
537	587.262	21	IgG3		1	EEQYNSTFR	EEQYN[21.537]STFR	2	Y	2	1	21	IgG3	0	FALSE	0	0.99	FALSE	1
562	587.262	21	IgG3		1	EEQYNSTFR	EEQYN[21.562]STFR	2	Y	2	1	21	IgG3	0	FALSE	0	0.99	FALSE	1
587	587.262	21	IgG3		1	EEQYNSTFR	EEQYN[21.587]STFR	2	Y	2	1	21	IgG3	0	FALSE	0	0.99	FALSE	1
612	587.262	21	IgG3		1	EEQYNSTFR	EEQYN[21.612]STFR	2	Y	2	1	21	IgG3	0	FALSE	0	0.99	FALSE	1
637	587.262	21	IgG3		1	EEQYNSTFR	EEQYN[21.637]STFR	2	Y	2	1	21	IgG3	0	FALSE	0	0.99	FALSE	1
662	587.262	21	IgG3		1	EEQYNSTFR	EEQYN[21.662]STFR	2	Y	2	1	21	IgG3	0	FALSE	0	0.99	FALSE	1
687	587.262	21	IgG3		1	EEQYNSTFR	EEQYN[21.687]STFR	2	Y	2	1	21	IgG3	0	FALSE	0	0.99	FALSE	1
712	587.262	21	IgG3		1	EEQYNSTFR	EEQYN[21.712]STFR	2	Y	2	1	21	IgG3	0	FALSE	0	0.99	FALSE	1
737	587.262	21	IgG3		1	EEQYNSTFR	EEQYN[21.737]STFR	2	Y	2	1	21	IgG3	0	FALSE	0	0.99	FALSE	1
762	587.262	21	IgG3		1	EEQYNSTFR	EEQYN[21.762]STFR	2	Y	2	1	21	IgG3	0	FALSE	0	0.99	FALSE	1
787	587.262	21	IgG3		1	EEQYNSTFR	EEQYN[21.787]STFR	2	Y	2	1	21	IgG3	0	FALSE	0	0.99	FALSE	1
812	587.262	21	IgG3		1	EEQYNSTFR	EEQYN[21.812]STFR	2	Y	2	1	21	IgG3	0	FALSE	0	0.99	FALSE	1
837	587.262	21	IgG3		1	EEQYNSTFR	EEQYN[21.837]STFR	2	Y	2	1	21	IgG3	0	FALSE	0	0.99	FALSE	1
862	587.262	21	IgG3		1	EEQYNSTFR	EEQYN[21.862]STFR	2	Y	2	1	21	IgG3	0	FALSE	0	0.99	FALSE	1
887	587.262	21	IgG3		1	EEQYNSTFR	EEQYN[21.887]STFR	2	Y	2	1	21	IgG3	0	FALSE	0	0.99	FALSE	1
912	587.262	21	IgG3		1	EEQYNSTFR	EEQYN[21.912]STFR	2	Y	2	1	21	IgG3	0	FALSE	0	0.99	FALSE	1
937	587.262	21	IgG3		1	EEQYNSTFR	EEQYN[21.937]STFR	2	Y	2	1	21	IgG3	0	FALSE	0	0.99	FALSE	1
962	587.262	21	IgG3		1	EEQYNSTFR	EEQYN[21.962]STFR	2	Y	2	1	21	IgG3	0	FALSE	0	0.99	FALSE	1
987	587.262	21	IgG3		1	EEQYNSTFR	EEQYN[21.987]STFR	2	Y	2	1	21	IgG3	0	FALSE	0	0.99	FALSE	1
1012	587.262	21	IgG3		1	EEQYNSTFR	EEQYN[21.1012]STFR	2	Y	2	1	21	IgG3	0	FALSE	0	0.99	FALSE	1
1037	587.262	21	IgG3		1	EEQYNSTFR	EEQYN[21.1037]STFR	2	Y	2	1	21	IgG3	0	FALSE	0	0.99	FALSE	1
1062	587.262	21	IgG3		1	EEQYNSTFR	EEQYN[21.1062]STFR	2	Y	2	1	21	IgG3	0	FALSE	0	0.99	FALSE	1
1087	587.262	21	IgG3		1	EEQYNSTFR	EEQYN[21.1087]STFR	2	Y	2	1	21	IgG3	0	FALSE	0	0.99	FALSE	1
1112	587.262	21	IgG3		1	EEQYNSTFR	EEQYN[21.1112]STFR	2	Y	2	1	21	IgG3	0	FALSE	0	0.99	FALSE	1
1137	587.262	21	IgG3		1	EEQYNSTFR	EEQYN[21.1137]STFR	2	Y	2	1	21	IgG3	0	FALSE	0	0.99	FALSE	1
1162	587.262	21	IgG3		1	EEQYNSTFR	EEQYN[21.1162]STFR	2	Y	2	1	21	IgG3	0	FALSE	0	0.99	FALSE	1
1187	587.262	21	IgG3		1	EEQYNSTFR	EEQYN[21.1187]STFR	2	Y	2	1	21	IgG3	0	FALSE	0	0.99	FALSE	1
1212	587.262	21	IgG3		1	EEQYNSTFR	EEQYN[21.1212]STFR	2	Y	2	1	21	IgG3	0	FALSE	0	0.99	FALSE	1
1237	587.262	21	IgG3		1	EEQYNSTFR	EEQYN[21.1237]STFR	2	Y	2	1	21	IgG3	0	FALSE	0	0.99	FALSE	1
412.5	1173.52	22	IgG3		1	EEQYNSTFR	EEQYN[22.412]STFR	2	Y	1	1	22	IgG3	0	FALSE	0	0.99	FALSE	1
437	1173.52	22	IgG3		1	EEQYNSTFR	EEQYN[22.437]STFR	2	Y	1	1	22	IgG3	0	FALSE	0	0.99	FALSE	1
462	1173.52	22	IgG3		1	EEQYNSTFR	EEQYN[22.462]STFR	2	Y	1	1	22	IgG3	0	FALSE	0	0.99	FALSE	1
487	1173.52	22	IgG3		1	EEQYNSTFR	EEQYN[22.487]STFR	2	Y	1	1	22	IgG3	0	FALSE	0	0.99	FALSE	1
512	1173.52	22	IgG3		1	EEQYNSTFR	EEQYN[22.512]STFR	2	Y	1	1	22	IgG3	0	FALSE	0	0.99	FALSE	1
537	1173.52	22	IgG3		1	EEQYNSTFR	EEQYN[22.537]STFR	2	Y	1	1	22	IgG3	0	FALSE	0	0.99	FALSE	1
562	1173.52	22	IgG3		1	EEQYNSTFR	EEQYN[22.562]STFR	2	Y	1	1	22	IgG3	0	FALSE	0	0.99	FALSE	1
587	1173.52	22	IgG3		1	EEQYNSTFR	EEQYN[22.587]STFR	2	Y	1	1	22	IgG3	0	FALSE	0	0.99	FALSE	1
612	1173.52	22	IgG3		1	EEQYNSTFR	EEQYN[22.612]STFR	2	Y	1	1	22	IgG3	0	FALSE	0	0.99	FALSE	1
637	1173.52	22	IgG3		1	EEQYNSTFR	EEQYN[22.637]STFR	2	Y	1	1	22	IgG3	0	FALSE	0	0.99	FALSE	1
662	1173.52	22	IgG3		1	EEQYNSTFR	EEQYN[22.662]STFR	2	Y	1	1	22	IgG3	0	FALSE	0	0.99	FALSE	1
687	1173.52	22	IgG3		1	EEQYNSTFR	EEQYN[22.687]STFR	2	Y	1	1	22	IgG3	0	FALSE	0	0.99	FALSE	1
712	1173.52	22	IgG3		1	EEQYNSTFR	EEQYN[22.712]STFR	2	Y	1	1	22	IgG3	0	FALSE	0	0.99	FALSE	1
737	1173.52	22	IgG3		1	EEQYNSTFR	EEQYN[22.737]STFR	2	Y	1	1	22	IgG3	0	FALSE	0	0.99	FALSE	1
762	1173.52	22	IgG3		1	EEQYNSTFR	EEQYN[22.762]STFR	2	Y	1	1	22	IgG3	0	FALSE	0	0.99	FALSE	1
787	1173.52	22	IgG3		1	EEQYNSTFR	EEQYN[22.787]STFR	2	Y	1	1	22	IgG3	0	FALSE	0	0.99	FALSE	1
812	1173.52	22	IgG3		1	EEQYNSTFR	EEQYN[22.812]STFR	2	Y	1	1	22	IgG3	0	FALSE	0	0.99	FALSE	1
837	1173.52	22	IgG3		1	EEQYNSTFR	EEQYN[22.837]STFR	2	Y	1	1	22	IgG3	0	FALSE	0	0.99	FALSE	1
862	1173.52	22	IgG3		1	EEQYNSTFR	EEQYN[22.862]STFR	2	Y	1	1	22	IgG3	0	FALSE	0	0.99	FALSE	1
887	1173.52	22	IgG3		1	EEQYNSTFR	EEQYN[22.887]STFR	2	Y	1	1	22	IgG3	0	FALSE	0	0.99	FALSE	1
912	1173.52	22	IgG3		1	EEQYNSTFR	EEQYN[22.912]STFR	2	Y	1	1	22	IgG3	0	FALSE	0	0.99	FALSE	1
937	1173.52	22	IgG3		1	EEQYNSTFR	EEQYN[22.937]STFR	2	Y	1	1	22	IgG3	0	FALSE	0	0.99	FALSE	1
962	1173.52	22	IgG3		1	EEQYNSTFR	EEQYN[22.962]STFR	2	Y	1	1	22	IgG3	0	FALSE	0	0.99	FALSE	1
987	1173.52	22	IgG3		1	EEQYNSTFR	EEQYN[22.987]STFR	2	Y	1	1	22	IgG3	0	FALSE	0	0.99	FALSE	1
1012	1173.52	22	IgG3		1	EEQYNSTFR	EEQYN[22.1012]STFR	2	Y	1	1	22	IgG3	0	FALSE	0	0.99	FALSE	1
1037	1173.52	22	IgG3		1	EEQYNSTFR	EEQYN[22.1037]STFR	2	Y	1	1	22	IgG3	0	FALSE	0	0.99	FALSE	1
1062	1173.52	22	IgG3		1	EEQYNSTFR	EEQYN[22.1062]STFR	2	Y	1	1	22	IgG3	0	FALSE	0	0.99	FALSE	1
1087	1173.52	22	IgG3		1	EEQYNSTFR	EEQYN[22.1087]STFR	2	Y	1	1	22	IgG3	0	FALSE	0	0.99	FALSE	1
1112	1173.52	22	IgG3		1	EEQYNSTFR	EEQYN[22.1112]STFR	2	Y	1	1	22	IgG3	0	FALSE	0	0.99	FALSE	1
1137	1173.52	22	IgG3		1	EEQYNSTFR	EEQYN[22.1137]STFR	2	Y	1	1	22	IgG3	0	FALSE	0	0.99	FALSE	1
1162	1173.52	22	IgG3		1	EEQYNSTFR	EEQYN[22.1162]STFR	2	Y	1	1	22	IgG3	0	FALSE	0	0.99	FALSE	1
1187	1173.52	22	IgG3		1	EEQYNSTFR	EEQYN[22.1187]STFR	2	Y	1	1	22	IgG3	0	FALSE	0	0.99	FALSE	1
1212	1173.52	22	IgG3		1	EEQYNSTFR	EEQYN[22.1212]STFR	2	Y	1	1	22	IgG3	0	FALSE	0	0.99	FALSE	1
1237	1173.52	22	IgG3		1	EEQYNSTFR	EEQYN[22.1237]STFR	2	Y	1	1	22	IgG3	0	FALSE	0	0.99	FALSE	1
412.5	587.262	22	IgG3		1	EEQYNSTFR	EEQYN[22.412]STFR	2	Y	2	1	22	IgG3	0	FALSE	0	0.99	FALSE	1
437	587.262	22	IgG3		1	EEQYNSTFR	EEQYN[22.437]STFR	2	Y	2	1	22	IgG3	0	FALSE	0	0.99	FALSE	1
462	587.262	22	IgG3		1	EEQYNSTFR	EEQYN[22.462]STFR	2	Y	2	1	22	IgG3	0	FALSE	0	0.99	FALSE	1
487	587.262	22	IgG3		1	EEQYNSTFR	EEQYN[22.487]STFR	2	Y	2	1	22	IgG3	0	FALSE	0	0.99	FALSE	1
512	587.262	22	IgG3		1	EEQYNSTFR	EEQYN[22.512]STFR	2	Y	2	1	22	IgG3	0	FALSE	0	0.99	FALSE	1
537	587.262	22	IgG3		1	EEQYNSTFR	EEQYN[22.537]STFR	2	Y	2	1	22	IgG3	0	FALSE	0	0.99	FALSE	1
562	587.262	22	IgG3		1	EEQYNSTFR	EEQYN[22.562]STFR	2	Y	2	1	22	IgG3	0	FALSE	0	0.99	FALSE	1
587	587.262	22	IgG3		1	EEQYNSTFR	EEQYN[22.587]STFR	2	Y	2	1	22	IgG3	0	FALSE	0	0.99	FALSE	1
612	587.262	22	IgG3		1	EEQYNSTFR	EEQYN[22.612]STFR	2	Y	2	1	22	IgG3	0	FALSE	0	0.99	FALSE	1
637	587.262	22	IgG3		1	EEQYNSTFR	EEQYN[22.637]STFR	2	Y	2	1	22	IgG3	0	FALSE	0	0.99	FALSE	1
662	587.262	22	IgG3		1	EEQYNSTFR	EEQYN[22.662]STFR	2	Y	2	1	22	IgG3	0	FALSE	0	0.99	FALSE	1
687	587.262	22	IgG3		1	EEQYNSTFR	EEQYN[22.687]STFR	2	Y	2	1	22	IgG3	0	FALSE	0	0.99	FALSE	1
712	587.262	22	IgG3		1	EEQYNSTFR	EEQYN[22.712]STFR	2	Y	2	1	22	IgG3	0	FALSE	0	0.99	FALSE	1
737	587.262	22	IgG3		1	EEQYNSTFR	EEQYN[22.737]STFR	2	Y	2	1	22	IgG3	0	FALSE	0	0.99	FALSE	1
762	587.262	22	IgG3		1	EEQYNSTFR	EEQYN[22.762]STFR	2	Y	2	1	22	IgG3	0	FALSE	0	0.99	FALSE	1
787	587.262	22	IgG3		1	EEQYNSTFR	EEQYN[22.787]STFR	2	Y	2	1	22	IgG3	0	FALSE	0	0.99	FALSE	1
812	587.262	22	IgG3		1	EEQYNSTFR	EEQYN[22.812]STFR	2	Y	2	1	22	IgG3	0	FALSE	0	0.99	FALSE	1
837	587.262	22	IgG3		1	EEQYNSTFR	EEQYN[22.837]STFR	2	Y	2	1	22	IgG3	0	FALSE	0	0.99	FALSE	1
862	587.262	22	IgG3		1	EEQYNSTFR	EEQYN[22.862]STFR	2	Y	2	1	22	IgG3	0	FALSE	0	0.99	FALSE	1
887	587.262	22	IgG3		1	EEQYNSTFR	EEQYN[22.887]STFR	2	Y	2	1	22	IgG3	0	FALSE	0	0.99	FALSE	1
912	587.262	22	IgG3		1	EEQYNSTFR	EEQYN[22.912]STFR	2	Y	2	1	22	IgG3	0	FALSE	0	0.99	FALSE	1
937	587.262	22	IgG3		1	EEQYNSTFR	EEQYN[22.937]STFR	2	Y	2	1	22	IgG3	0	FALSE	0	0.99	FALSE	1
962	587.262	22	IgG3		1	EEQYNSTFR	EEQYN[22.962]STFR	2	Y	2	1	22	IgG3	0	FALSE	0	0.99	FALSE	1
987	587.262	22	IgG3		1	EEQYNSTFR	EEQYN[22.987]STFR	2	Y	2	1	22	IgG3	0	FALSE	0	0.99	FALSE	1
1012	587.262	22	IgG3		1	EEQYNSTFR	EEQYN[22.1012]STFR	2	Y	2	1	22	IgG3	0	FALSE	0	0.99	FALSE	1
1037	587.262	22	IgG3		1	EEQYNSTFR	EEQYN[22.1037]STFR	2	Y	2	1	22	IgG3	0	FALSE	0	0.99	FALSE	1
1062	587.262	22	IgG3		1	EEQYNSTFR	EEQYN[22.1062]STFR	2	Y	2	1	22	IgG3	0	FALSE	0	0.99	FALSE	1
1087	587.262	22	IgG3		1	EEQYNSTFR	EEQYN[22.1087]STFR	2	Y	2	1	22	IgG3	0	FALSE	0	0.99	FALSE	1
1112	587.262	22	IgG3		1	EEQYNSTFR	EEQYN[22.1112]STFR	2	Y	2	1	22	IgG3	0	FALSE	0	0.99	FALSE	1
1137	587.262	22	IgG3		1	EEQYNSTFR	EEQYN[22.1137]STFR	2	Y	2	1	22	IgG3	0	FALSE	0	0.99	FALSE	1
1162	587.262	22	IgG3		1	EEQYNSTFR	EEQYN[22.1162]STFR	2	Y	2	1	22	IgG3	0	FALSE	0	0.99	FALSE	1
1187	587.262	22	IgG3		1	EEQYNSTFR	EEQYN[22.1187]STFR	2	Y	2	1	22	IgG3	0	FALSE	0	0.99	FALSE	1
1212	587.262	22	IgG3		1	EEQYNSTFR	EEQYN[22.1212]STFR	2	Y	2	1	22	IgG3	0	FALSE	0	0.99	FALSE	1
1237	587.262	22	IgG3		1	EEQYNSTFR	EEQYN[22.1237]STFR	2	Y	2	1	22	IgG3	0	FALSE	0	0.99	FALSE	1
412.5	1173.52	23	IgG3		1	EEQYNSTFR	EEQYN[23.412]STFR	2	Y	1	1	23	IgG3	0	FALSE	0	0.99	FALSE	1
437	1173.52	23	IgG3		1	EEQYNSTFR	EEQYN[23.437]STFR	2	Y	1	1	23	IgG3	0	FALSE	0	0.99	FALSE	1
462	1173.52	23	IgG3		1	EEQYNSTFR	EEQYN[23.462]STFR	2	Y	1	1	23	IgG3	0	FALSE	0	0.99	FALSE	1
487	1173.52	23	IgG3		1	EEQYNSTFR	EEQYN[23.487]STFR	2	Y	1	1	23	IgG3	0	FALSE	0	0.99	FALSE	1
512	1173.52	23	IgG3		1	EEQYNSTFR	EEQYN[23.512]STFR	2	Y	1	1	23	IgG3	0	FALSE	0	0.99	FALSE	1
537	1173.52	23	IgG3		1	EEQYNSTFR	EEQYN[23.537]STFR	2	Y	1	1	23	IgG3	0	FALSE	0	0.99	FALSE	1
562	1173.52	23	IgG3		1	EEQYNSTFR	EEQYN[23.562]STFR	2	Y	1	1	23	IgG3	0	FALSE	0	0.99	FALSE	1
587	1173.52	23	IgG3		1	EEQYNSTFR	EEQYN[23.587]STFR	2	Y	1	1	23	IgG3	0	FALSE	0	0.99	FALSE	1
612	1173.52	23	IgG3		1	EEQYNSTFR	EEQYN[23.612]STFR	2	Y	1	1	23	IgG3	0	FALSE	0	0.99	FALSE	1
637	1173.52	23	IgG3		1	EEQYNSTFR	EEQYN[23.637]STFR	2	Y	1	1	23	IgG3	0	FALSE	0	0.99	FALSE	1
662	1173.52	23	IgG3		1	EEQYNSTFR	EEQYN[23.662]STFR	2	Y	1	1	23	IgG3	0	FALSE	0	0.99	FALSE	1
687	1173.52	23	IgG3		1	EEQYNSTFR	EEQYN[23.687]STFR	2	Y	1	1	23	IgG3	0	FALSE	0	0.99	FALSE	1
712	1173.52	23	IgG3		1	EEQYNSTFR	EEQYN[23.712]STFR	2	Y	1	1	23	IgG3	0	FALSE	0	0.99	FALSE	1
737	1173.52	23	IgG3		1	EEQYNSTFR	EEQYN[23.737]STFR	2	Y	1	1	23	IgG3	0	FALSE	0	0.99	FALSE	1
762	1173.52	23	IgG3		1	EEQYNSTFR	EEQYN[23.762]STFR	2	Y	1	1	23	IgG3	0	FALSE	0	0.99	FALSE	1
787	1173.52	23	IgG3		1	EEQYNSTFR	EEQYN[23.787]STFR	2	Y	1	1	23	IgG3	0	FALSE	0	0.99	FALSE	1
812	1173.52	23	IgG3		1	EEQYNSTFR	EEQYN[23.812]STFR	2	Y	1	1	23	IgG3	0	FALSE	0	0.99	FALSE	1
837	1173.52	23	IgG3		1	EEQYNSTFR	EEQYN[23.837]STFR	2	Y	1	1	23	IgG3	0	FALSE	0	0.99	FALSE	1
862	1173.52	23	IgG3		1	EEQYNSTFR	EEQYN[23.862]STFR	2	Y	1	1	23	IgG3	0	FALSE	0	0.99	FALSE	1
887	1173.52	23	IgG3		1	EEQYNSTFR	EEQYN[23.887]STFR	2	Y	1	1	23	IgG3	0	FALSE	0	0.99	FALSE	1
912	1173.52	23	IgG3		1	EEQYNSTFR	EEQYN[23.912]STFR	2	Y	1	1	23	IgG3	0	FALSE	0	0.99	FALSE	1
937	1173.52	23	IgG3		1	EEQYNSTFR	EEQYN[23.937]STFR	2	Y	1	1	23	IgG3	0	FALSE	0	0.99	FALSE	1
962	1173.52	23	IgG3		1	EEQYNSTFR	EEQYN[23.962]STFR	2	Y	1	1	23	IgG3	0	FALSE	0	0.99	FALSE	1
987	1173.52	23	IgG3		1	EEQYNSTFR	EEQYN[23.987]STFR	2	Y	1	1	23	IgG3	0	FALSE	0	0.99	FALSE	1
1012	1173.52	23	IgG3		1	EEQYNSTFR	EEQYN[23.1012]STFR	2	Y	1	1	23	IgG3	0	FALSE	0	0.99	FALSE	1
1037	1173.52	23	IgG3		1	EEQYNSTFR	EEQYN[23.1037]STFR	2	Y	1	1	23	IgG3	0	FALSE	0	0.99	FALSE	1
1062	1173.52	23	IgG3		1	EEQYNSTFR	EEQYN[23.1062]STFR	2	Y	1	1	23	IgG3	0	FALSE	0	0.99	FALSE	1
1087	1173.52	23	IgG3		1	EEQYNSTFR	EEQYN[23.1087]STFR	2	Y	1	1	23	IgG3	0	FALSE	0	0.99	FALSE	1
1112	1173.52	23	IgG3		1	EEQYNSTFR	EEQYN[23.1112]STFR	2	Y	1	1	23	IgG3	0	FALSE	0	0.99	FALSE	1
1137	1173.52	23	IgG3		1	EEQYNSTFR	EEQYN[23.1137]STFR	2	Y	1	1	23	IgG3	0	FALSE	0	0.99	FALSE	1
1162	1173.52	23	IgG3		1	EEQYNSTFR	EEQYN[23.1162]STFR	2	Y	1	1	23	IgG3	0	FALSE	0	0.99	FALSE	1
1187	1173.52	23	IgG3		1	EEQYNSTFR	EEQYN[23.1187]STFR	2	Y	1	1	23	IgG3	0	FALSE	0	0.99	FALSE	1
1212	1173.52	23	IgG3		1	EEQYNSTFR	EEQYN[23.1212]STFR	2	Y	1	1	23	IgG3	0	FALSE	0	0.99	FALSE	1
1237	1173.52	23	IgG3		1	EEQYNSTFR	EEQYN[23.1237]STFR	2	Y	1	1	23	IgG3	0	FALSE	0	0.99	FALSE	1
412.5	587.262	23	IgG3		1	EEQYNSTFR	EEQYN[23.412]STFR	2	Y	2	1	23	IgG3	0	FALSE	0	0.99	FALSE	1
437	587.262	23	IgG3		1	EEQYNSTFR	EEQYN[23.437]STFR	2	Y	2	1	23	IgG3	0	FALSE	0	0.99	FALSE	1
462	587.262	23	IgG3		1	EEQYNSTFR	EEQYN[23.462]STFR	2	Y	2	1	23	IgG3	0	FALSE	0	0.99	FALSE	1
487	587.262	23	IgG3		1	EEQYNSTFR	EEQYN[23.487]STFR	2	Y	2	1	23	IgG3	0	FALSE	0	0.99	FALSE	1
512	587.262	23	IgG3		1	EEQYNSTFR	EEQYN[23.512]STFR	2	Y	2	1	23	IgG3	0	FALSE	0	0.99	FALSE	1
537	587.262	23	IgG3		1	EEQYNSTFR	EEQYN[23.537]STFR	2	Y	2	1	23	IgG3	0	FALSE	0	0.99	FALSE	1
562	587.262	23	IgG3		1	EEQYNSTFR	EEQYN[23.562]STFR	2	Y	2	1	23	IgG3	0	FALSE	0	0.99	FALSE	1
587	587.262	23	IgG3		1	EEQYNSTFR	EEQYN[23.587]STFR	2	Y	2	1	23	IgG3	0	FALSE	0	0.99	FALSE	1
612	587.262	23	IgG3		1	EEQYNSTFR	EEQYN[23.612]STFR	2	Y	2	1	23	IgG3	0	FALSE	0	0.99	FALSE	1
637	587.262	23	IgG3		1	EEQYNSTFR	EEQYN[23.637]STFR	2	Y	2	1	23	IgG3	0	FALSE	0	0.99	FALSE	1
662	587.262	23	IgG3		1	EEQYNSTFR	EEQYN[23.662]STFR	2	Y	2	1	23	IgG3	0	FALSE	0	0.99	FALSE	1
687	587.262	23	IgG3		1	EEQYNSTFR	EEQYN[23.687]STFR	2	Y	2	1	23	IgG3	0	FALSE	0	0.99	FALSE	1
712	587.262	23	IgG3		1	EEQYNSTFR	EEQYN[23.712]STFR	2	Y	2	1	23	IgG3	0	FALSE	0	0.99	FALSE	1
737	587.262	23	IgG3		1	EEQYNSTFR	EEQYN[23.737]STFR	2	Y	2	1	23	IgG3	0	FALSE	0	0.99	FALSE	1
762	587.262	23	IgG3		1	EEQYNSTFR	EEQYN[23.762]STFR	2	Y	2	1	23	IgG3	0	FALSE	0	0.99	FALSE	1
787	587.262	23	IgG3		1	EEQYNSTFR	EEQYN[23.787]STFR	2	Y	2	1	23	IgG3	0	FALSE	0	0.99	FALSE	1
812	587.262	23	IgG3		1	EEQYNSTFR	EEQYN[23.812]STFR	2	Y	2	1	23	IgG3	0	FALSE	0	0.99	FALSE	1
837	587.262	23	IgG3		1	EEQYNSTFR	EEQYN[23.837]STFR	2	Y	2	1	23	IgG3	0	FALSE	0	0.99	FALSE	1
862	587.262	23	IgG3		1	EEQYNSTFR	EEQYN[23.862]STFR	2	Y	2	1	23	IgG3	0	FALSE	0	0.99	FALSE	1
887	587.262	23	IgG3		1	EEQYNSTFR	EEQYN[23.887]STFR	2	Y	2	1	23	IgG3	0	FALSE	0	0.99	FALSE	1
912	587.262	23	IgG3		1	EEQYNSTFR	EEQYN[23.912]STFR	2	Y	2	1	23	IgG3	0	FALSE	0	0.99	FALSE	1
937	587.262	23	IgG3		1	EEQYNSTFR	EEQYN[23.937]STFR	2	Y	2	1	23	IgG3	0	FALSE	0	0.99	FALSE	1
962	587.262	23	IgG3		1	EEQYNSTFR	EEQYN[23.962]STFR	2	Y	2	1	23	IgG3	0	FALSE	0	0.99	FALSE	1
987	587.262	23	IgG3		1	EEQYNSTFR	EEQYN[23.987]STFR	2	Y	2	1	23	IgG3	0	FALSE	0	0.99	FALSE	1
1012	587.262	23	IgG3		1	EEQYNSTFR	EEQYN[23.1012]STFR	2	Y	2	1	23	IgG3	0	FALSE	0	0.99	FALSE	1
1037	587.262	23	IgG3		1	EEQYNSTFR	EEQYN[23.1037]STFR	2	Y	2	1	23	IgG3	0	FALSE	0	0.99	FALSE	1
1062	587.262	23	IgG3		1	EEQYNSTFR	EEQYN[23.1062]STFR	2	Y	2	1	23	IgG3	0	FALSE	0	0.99	FALSE	1
1087	587.262	23	IgG3		1	EEQYNSTFR	EEQYN[23.1087]STFR	2	Y	2	1	23	IgG3	0	FALSE	0	0.99	FALSE	1
1112	587.262	23	IgG3		1	EEQYNSTFR	EEQYN[23.1112]STFR	2	Y	2	1	23	IgG3	0	FALSE	0	0.99	FALSE	1
1137	587.262	23	IgG3		1	EEQYNSTFR	EEQYN[23.1137]STFR	2	Y	2	1	23	IgG3	0	FALSE	0	0.99	FALSE	1
1162	587.262	23	IgG3		1	EEQYNSTFR	EEQYN[23.1162]STFR	2	Y	2	1	23	IgG3	0	FALSE	0	0.99	FALSE	1
1187	587.262	23	IgG3		1	EEQYNSTFR	EEQYN[23.1187]STFR	2	Y	2	1	23	IgG3	0	FALSE	0	0.99	FALSE	1
1212	587.262	23	IgG3		1	EEQYNSTFR	EEQYN[23.1212]STFR	2	Y	2	1	23	IgG3	0	FALSE	0	0.99	FALSE	1
1237	587.262	23	IgG3		1	EEQYNSTFR	EEQYN[23.1237]STFR	2	Y	2	1	23	IgG3	0	FALSE	0	0.99	FALSE	1
412.5	1173.52	24	IgG3		1	EEQYNSTFR	EEQYN[24.412]STFR	2	Y	1	1	24	IgG3	0	FALSE	0	0.99	FALSE	1
437	1173.52	24	IgG3		1	EEQYNSTFR	EEQYN[24.437]STFR	2	Y	1	1	24	IgG3	0	FALSE	0	0.99	FALSE	1
462	1173.52	24	IgG3		1	EEQYNSTFR	EEQYN[24.462]STFR	2	Y	1	1	24	IgG3	0	FALSE	0	0.99	FALSE	1
487	1173.52	24	IgG3		1	EEQYNSTFR	EEQYN[24.487]STFR	2	Y	1	1	24	IgG3	0	FALSE	0	0.99	FALSE	1
512	1173.52	24	IgG3		1	EEQYNSTFR	EEQYN[24.512]STFR	2	Y	1	1	24	IgG3	0	FALSE	0	0.99	FALSE	1
537	1173.52	24	IgG3		1	EEQYNSTFR	EEQYN[24.537]STFR	2	Y	1	1	24	IgG3	0	FALSE	0	0.99	FALSE	1
562	1173.52	24	IgG3		1	EEQYNSTFR	EEQYN[24.562]STFR	2	Y	1	1	24	IgG3	0	FALSE	0	0.99	FALSE	1
587	1173.52	24	IgG3		1	EEQYNSTFR	EEQYN[24.587]STFR	2	Y	1	1	24	IgG3	0	FALSE	0	0.99	FALSE	1
612	1173.52	24	IgG3		1	EEQYNSTFR	EEQYN[24.612]STFR	2	Y	1	1	24	IgG3	0	FALSE	0	0.99	FALSE	1
637	1173.52	24	IgG3		1	EEQYNSTFR	EEQYN[24.637]STFR	2	Y	1	1	24	IgG3	0	FALSE	0	0.99	FALSE	1
662	1173.52	24	IgG3		1	EEQYNSTFR	EEQYN[24.662]STFR	2	Y	1	1	24	IgG3	0	FALSE	0	0.99	FALSE	1
687	1173.52	24	IgG3		1	EEQYNSTFR	EEQYN[24.687]STFR	2	Y	1	1	24	IgG3	0	FALSE	0	0.99	FALSE	1
712	1173.52	24	IgG3		1	EEQYNSTFR	EEQYN[24.712]STFR	2	Y	1	1	24	IgG3	0	FALSE	0	0.99	FALSE	1
737	1173.52	24	IgG3		1	EEQYNSTFR	EEQYN[24.737]STFR	2	Y	1	1	24	IgG3	0	FALSE	0	0.99	FALSE	1
762	1173.52	24	IgG3		1	EEQYNSTFR	EEQYN[24.762]STFR	2	Y	1	1	24	IgG3	0	FALSE	0	0.99	FALSE	1
787	1173.52	24	IgG3		1	EEQYNSTFR	EEQYN[24.787]STFR	2	Y	1	1	24	IgG3	0	FALSE	0	0.99	FALSE	1
812	1173.52	24	IgG3		1	EEQYNSTFR	EEQYN[24.812]STFR	2	Y	1	1	24	IgG3	0	FALSE	0	0.99	FALSE	1
837	1173.52	24	IgG3		1	EEQYNSTFR	EEQYN[24.837]STFR	2	Y	1	1	24	IgG3	0	FALSE	0	0.99	FALSE	1
862	1173.52	24	IgG3		1	EEQYNSTFR	EEQYN[24.862]STFR	2	Y	1	1	24	IgG3	0	FALSE	0	0.99	FALSE	1
887	1173.52	24	IgG3		1	EEQYNSTFR	EEQYN[24.887]STFR	2	Y	1	1	24	IgG3	0	FALSE	0	0.99	FALSE	1
912	1173.52	24	IgG3		1	EEQYNSTFR	EEQYN[24.912]STFR	2	Y	1	1	24	IgG3	0	FALSE	0	0.99	FALSE	1
937	1173.52	24	IgG3		1	EEQYNSTFR	EEQYN[24.937]STFR	2	Y	1	1	24	IgG3	0	FALSE	0	0.99	FALSE	1
962	1173.52	24	IgG3		1	EEQYNSTFR	EEQYN[24.962]STFR	2	Y	1	1	24	IgG3	0	FALSE	0	0.99	FALSE	1
987	1173.52	24	IgG3		1	EEQYNSTFR	EEQYN[24.987]STFR	2	Y	1	1	24	IgG3	0	FALSE	0	0.99	FALSE	1
1012	1173.52	24	IgG3		1	EEQYNSTFR	EEQYN[24.1012]STFR	2	Y	1	1	24	IgG3	0	FALSE	0	0.99	FALSE	1
1037	1173.52	24	IgG3		1	EEQYNSTFR	EEQYN[24.1037]STFR	2	Y	1	1	24	IgG3	0	FALSE	0	0.99	FALSE	1
1062	1173.52	24	IgG3		1	EEQYNSTFR	EEQYN[24.1062]STFR	2	Y	1	1	24	IgG3	0	FALSE	0	0.99	FALSE	1
1087	1173.52	24	IgG3		1	EEQYNSTFR	EEQYN[24.1087]STFR	2	Y	1	1	24	IgG3	0	FALSE	0	0.99	FALSE	1
1112	1173.52	24	IgG3		1	EEQYNSTFR	EEQYN[24.1112]STFR	2	Y	1	1	24	IgG3	0	FALSE	0	0.99	FALSE	1
1137	1173.52	24	IgG3		1	EEQYNSTFR	EEQYN[24.1137]STFR	2	Y	1	1	24	IgG3	0	FALSE	0	0.99	FALSE	1
1162	1173.52	24	IgG3		1	EEQYNSTFR	EEQYN[24.1162]STFR	2	Y	1	1	24	IgG3	0	FALSE	0	0.99	FALSE	1
1187	1173.52	24	IgG3		1	EEQYNSTFR	EEQYN[24.1187]STFR	2	Y	1	1	24	IgG3	0	FALSE	0	0.99	FALSE	1
1212	1173.52	24	IgG3		1	EEQYNSTFR	EEQYN[24.1212]STFR	2	Y	1	1	24	IgG3	0	FALSE	0	0.99	FALSE	1
1237	1173.52	24	IgG3		1	EEQYNSTFR	EEQYN[24.1237]STFR	2	Y	1	1	24	IgG3	0	FALSE	0	0.99	FALSE	1
412.5	587.262	24	IgG3		1	EEQYNSTFR	EEQYN[24.412]STFR	2	Y	2	1	24	IgG3	0	FALSE	0	0.99	FALSE	1
437	587.262	24	IgG3		1	EEQYNSTFR	EEQYN[24.437]STFR	2	Y	2	1	24	IgG3	0	FALSE	0	0.99	FALSE	1
462	587.262	24	IgG3		1	EEQYNSTFR	EEQYN[24.462]STFR	2	Y	2	1	24	IgG3	0	FALSE	0	0.99	FALSE	1
487	587.262	24	IgG3		1	EEQYNSTFR	EEQYN[24.487]STFR	2	Y	2	1	24	IgG3	0	FALSE	0	0.99	FALSE	1
512	587.262	24	IgG3		1	EEQYNSTFR	EEQYN[24.512]STFR	2	Y	2	1	24	IgG3	0	FALSE	0	0.99	FALSE	1
537	587.262	24	IgG3		1	EEQYNSTFR	EEQYN[24.537]STFR	2	Y	2	1	24	IgG3	0	FALSE	0	0.99	FALSE	1
562	587.262	24	IgG3		1	EEQYNSTFR	EEQYN[24.562]STFR	2	Y	2	1	24	IgG3	0	FALSE	0	0.99	FALSE	1
587	587.262	24	IgG3		1	EEQYNSTFR	EEQYN[24.587]STFR	2	Y	2	1	24	IgG3	0	FALSE	0	0.99	FALSE	1
612	587.262	24	IgG3		1	EEQYNSTFR	EEQYN[24.612]STFR	2	Y	2	1	24	IgG3	0	FALSE	0	0.99	FALSE	1
637	587.262	24	IgG3		1	EEQYNSTFR	EEQYN[24.637]STFR	2	Y	2	1	24	IgG3	0	FALSE	0	0.99	FALSE	1
662	587.262	24	IgG3		1	EEQYNSTFR	EEQYN[24.662]STFR	2	Y	2	1	24	IgG3	0	FALSE	0	0.99	FALSE	1
687	587.262	24	IgG3		1	EEQYNSTFR	EEQYN[24.687]STFR	2	Y	2	1	24	IgG3	0	FALSE	0	0.99	FALSE	1
712	587.262	24	IgG3		1	EEQYNSTFR	EEQYN[24.712]STFR	2	Y	2	1	24	IgG3	0	FALSE	0	0.99	FALSE	1
737	587.262	24	IgG3		1	EEQYNSTFR	EEQYN[24.737]STFR	2	Y	2	1	24	IgG3	0	FALSE	0	0.99	FALSE	1
762	587.262	24	IgG3		1	EEQYNSTFR	EEQYN[24.762]STFR	2	Y	2	1	24	IgG3	0	FALSE	0	0.99	FALSE	1
787	587.262	24	IgG3		1	EEQYNSTFR	EEQYN[24.787]STFR	2	Y	2	1	24	IgG3	0	FALSE	0	0.99	FALSE	1
812	587.262	24	IgG3		1	EEQYNSTFR	EEQYN[24.812]STFR	2	Y	2	1	24	IgG3	0	FALSE	0	0.99	FALSE	1
837	587.262	24	IgG3		1	EEQYNSTFR	EEQYN[24.837]STFR	2	Y	2	1	24	IgG3	0	FALSE	0	0.99	FALSE	1
862	587.262	24	IgG3		1	EEQYNSTFR	EEQYN[24.862]STFR	2	Y	2	1	24	IgG3	0	FALSE	0	0.99	FALSE	1
887	587.262	24	IgG3		1	EEQYNSTFR	EEQYN[24.887]STFR	2	Y	2	1	24	IgG3	0	FALSE	0	0.99	FALSE	1
912	587.262	24	IgG3		1	EEQYNSTFR	EEQYN[24.912]STFR	2	Y	2	1	24	IgG3	0	FALSE	0	0.99	FALSE	1
937	587.262	24	IgG3		1	EEQYNSTFR	EEQYN[24.937]STFR	2	Y	2	1	24	IgG3	0	FALSE	0	0.99	FALSE	1
962	587.262	24	IgG3		1	EEQYNSTFR	EEQYN[24.962]STFR	2	Y	2	1	24	IgG3	0	FALSE	0	0.99	FALSE	1
987	587.262	24	IgG3		1	EEQYNSTFR	EEQYN[24.987]STFR	2	Y	2	1	24	IgG3	0	FALSE	0	0.99	FALSE	1
1012	587.262	24	IgG3		1	EEQYNSTFR	EEQYN[24.1012]STFR	2	Y	2	1	24	IgG3	0	FALSE	0	0.99	FALSE	1
1037	587.262	24	IgG3		1	EEQYNSTFR	EEQYN[24.1037]STFR	2	Y	2	1	24	IgG3	0	FALSE	0	0.99	FALSE	1
1062	587.262	24	IgG3		1	EEQYNSTFR	EEQYN[24.1062]STFR	2	Y	2	1	24	IgG3	0	FALSE	0	0.99	FALSE	1
1087	587.262	24	IgG3		1	EEQYNSTFR	EEQYN[24.1087]STFR	2	Y	2	1	24	IgG3	0	FALSE	0	0.99	FALSE	1
1112	587.262	24	IgG3		1	EEQYNSTFR	EEQYN[24.1112]STFR	2	Y	2	1	24	IgG3	0	FALSE	0	0.99	FALSE	1
1137	587.262	24	IgG3		1	EEQYNSTFR	EEQYN[24.1137]STFR	2	Y	2	1	24	IgG3	0	FALSE	0	0.99	FALSE	1
1162	587.262	24	IgG3		1	EEQYNSTFR	EEQYN[24.1162]STFR	2	Y	2	1	24	IgG3	0	FALSE	0	0.99	FALSE	1
1187	587.262	24	IgG3		1	EEQYNSTFR	EEQYN[24.1187]STFR	2	Y	2	1	24	IgG3	0	FALSE	0	0.99	FALSE	1
1212	587.262	24	IgG3		1	EEQYNSTFR	EEQYN[24.1212]STFR	2	Y	2	1	24	IgG3	0	FALSE	0	0.99	FALSE	1
1237	587.262	24	IgG3		1	EEQYNSTFR	EEQYN[24.1237]STFR	2	Y	2	1	24	IgG3	0	FALSE	0	0.99	FALSE	1
412.5	1173.52	25	IgG3		1	EEQYNSTFR	EEQYN[25.412]STFR	2	Y	1	1	25	IgG3	0	FALSE	0	0.99	FALSE	1
437	1173.52	25	IgG3		1	EEQYNSTFR	EEQYN[25.437]STFR	2	Y	1	1	25	IgG3	0	FALSE	0	0.99	FALSE	1
462	1173.52	25	IgG3		1	EEQYNSTFR	EEQYN[25.462]STFR	2	Y	1	1	25	IgG3	0	FALSE	0	0.99	FALSE	1
487	1173.52	25	IgG3		1	EEQYNSTFR	EEQYN[25.487]STFR	2	Y	1	1	25	IgG3	0	FALSE	0	0.99	FALSE	1
512	1173.52	25	IgG3		1	EEQYNSTFR	EEQYN[25.512]STFR	2	Y	1	1	25	IgG3	0	FALSE	0	0.99	FALSE	1
537	1173.52	25	IgG3		1	EEQYNSTFR	EEQYN[25.537]STFR	2	Y	1	1	25	IgG3	0	FALSE	0	0.99	FALSE	1
562	1173.52	25	IgG3		1	EEQYNSTFR	EEQYN[25.562]STFR	2	Y	1	1	25	IgG3	0	FALSE	0	0.99	FALSE	1
587	1173.52	25	IgG3		1	EEQYNSTFR	EEQYN[25.587]STFR	2	Y	1	1	25	IgG3	0	FALSE	0	0.99	FALSE	1
612	1173.52	25	IgG3		1	EEQYNSTFR	EEQYN[25.612]STFR	2	Y	1	1	25	IgG3	0	FALSE	0	0.99	FALSE	1
637	1173.52	25	IgG3		1	EEQYNSTFR	EEQYN[25.637]STFR	2	Y	1	1	25	IgG3	0	FALSE	0	0.99	FALSE	1
662	1173.52	25	IgG3		1	EEQYNSTFR	EEQYN[25.662]STFR	2	Y	1	1	25	IgG3	0	FALSE	0	0.99	FALSE	1
687	1173.52	25	IgG3		1	EEQYNSTFR	EEQYN[25.687]STFR	2	Y	1	1	25	IgG3	0	FALSE	0	0.99	FALSE	1
712	1173.52	25	IgG3		1	EEQYNSTFR	EEQYN[25.712]STFR	2	Y	1	1	25	IgG3	0	FALSE	0	0.99	FALSE	1
737	1173.52	25	IgG3		1	EEQYNSTFR	EEQYN[25.737]STFR	2	Y	1	1	25	IgG3	0	FALSE	0	0.99	FALSE	1
762	1173.52	25	IgG3		1	EEQYNSTFR	EEQYN[25.762]STFR	2	Y	1	1	25	IgG3	0	FALSE	0	0.99	FALSE	1
787	1173.52	25	IgG3		1	EEQYNSTFR	EEQYN[25.787]STFR	2	Y	1	1	25	IgG3	0	FALSE	0	0.99	FALSE	1
812	1173.52	25	IgG3		1	EEQYNSTFR	EEQYN[25.812]STFR	2	Y	1	1	25	IgG3	0	FALSE	0	0.99	FALSE	1
837	1173.52	25	IgG3		1	EEQYNSTFR	EEQYN[25.837]STFR	2	Y	1	1	25	IgG3	0	FALSE	0	0.99	FALSE	1
862	1173.52	25	IgG3		1	EEQYNSTFR	EEQYN[25.862]STFR	2	Y	1	1	25	IgG3	0	FALSE	0	0.99	FALSE	1
887	1173.52	25	IgG3		1	EEQYNSTFR	EEQYN[25.887]STFR	2	Y	1	1	25	IgG3	0	FALSE	0	0.99	FALSE	1
912	1173.52	25	IgG3		1	EEQYNSTFR	EEQYN[25.912]STFR	2	Y	1	1	25	IgG3	0	FALSE	0	0.99	FALSE	1
937	1173.52	25	IgG3		1	EEQYNSTFR	EEQYN[25.937]STFR	2	Y	1	1	25	IgG3	0	FALSE	0	0.99	FALSE	1
962	1173.52	25	IgG3		1	EEQYNSTFR	EEQYN[25.962]STFR	2	Y	1	1	25	IgG3	0	FALSE	0	0.99	FALSE	1
987	1173.52	25	IgG3		1	EEQYNSTFR	EEQYN[25.987]STFR	2	Y	1	1	25	IgG3	0	FALSE	0	0.99	FALSE	1
1012	1173.52	25	IgG3		1	EEQYNSTFR	EEQYN[25.1012]STFR	2	Y	1	1	25	IgG3	0	FALSE	0	0.99	FALSE	1
1037	1173.52	25	IgG3		1	EEQYNSTFR	EEQYN[25.1037]STFR	2	Y	1	1	25	IgG3	0	FALSE	0	0.99	FALSE	1
1062	1173.52	25	IgG3		1	EEQYNSTFR	EEQYN[25.1062]STFR	2	Y	1	1	25	IgG3	0	FALSE	0	0.99	FALSE	1
1087	1173.52	25	IgG3		1	EEQYNSTFR	EEQYN[25.1087]STFR	2	Y	1	1	25	IgG3	0	FALSE	0	0.99	FALSE	1
1112	1173.52	25	IgG3		1	EEQYNSTFR	EEQYN[25.1112]STFR	2	Y	1	1	25	IgG3	0	FALSE	0	0.99	FALSE	1
1137	1173.52	25	IgG3		1	EEQYNSTFR	EEQYN[25.1137]STFR	2	Y	1	1	25	IgG3	0	FALSE	0	0.99	FALSE	1
1162	1173.52	25	IgG3		1	EEQYNSTFR	EEQYN[25.1162]STFR	2	Y	1	1	25	IgG3	0	FALSE	0	0.99	FALSE	1
1187	1173.52	25	IgG3		1	EEQYNSTFR	EEQYN[25.1187]STFR	2	Y	1	1	25	IgG3	0	FALSE	0	0.99	FALSE	1
1212	1173.52	25	IgG3		1	EEQYNSTFR	EEQYN[25.1212]STFR	2	Y	1	1	25	IgG3	0	FALSE	0	0.99	FALSE	1
1237	1173.52	25	IgG3		1	EEQYNSTFR	EEQYN[25.1237]STFR	2	Y	1	1	25	IgG3	0	FALSE	0	0.99	FALSE	1
412.5	587.262	25	IgG3		1	EEQYNSTFR	EEQYN[25.412]STFR	2	Y	2	1	25	IgG3	0	FALSE	0	0.99	FALSE	1
437	587.262	25	IgG3		1	EEQYNSTFR	EEQYN[25.437]STFR	2	Y	2	1	25	IgG3	0	FALSE	0	0.99	FALSE	1
462	587.262	25	IgG3		1	EEQYNSTFR	EEQYN[25.462]STFR	2	Y	2	1	25	IgG3	0	FALSE	0	0.99	FALSE	1
487	587.262	25	IgG3		1	EEQYNSTFR	EEQYN[25.487]STFR	2	Y	2	1	25	IgG3	0	FALSE	0	0.99	FALSE	1
512	587.262	25	IgG3		1	EEQYNSTFR	EEQYN[25.512]STFR	2	Y	2	1	25	IgG3	0	FALSE	0	0.99	FALSE	1
537	587.262	25	IgG3		1	EEQYNSTFR	EEQYN[25.537]STFR	2	Y	2	1	25	IgG3	0	FALSE	0	0.99	FALSE	1
562	587.262	25	IgG3		1	EEQYNSTFR	EEQYN[25.562]STFR	2	Y	2	1	25	IgG3	0	FALSE	0	0.99	FALSE	1
587	587.262	25	IgG3		1	EEQYNSTFR	EEQYN[25.587]STFR	2	Y	2	1	25	IgG3	0	FALSE	0	0.99	FALSE	1
612	587.262	25	IgG3		1	EEQYNSTFR	EEQYN[25.612]STFR	2	Y	2	1	25	IgG3	0	FALSE	0	0.99	FALSE	1
637	587.262	25	IgG3		1	EEQYNSTFR	EEQYN[25.637]STFR	2	Y	2	1	25	IgG3	0	FALSE	0	0.99	FALSE	1
662	587.262	25	IgG3		1	EEQYNSTFR	EEQYN[25.662]STFR	2	Y	2	1	25	IgG3	0	FALSE	0	0.99	FALSE	1
687	587.262	25	IgG3		1	EEQYNSTFR	EEQYN[25.687]STFR	2	Y	2	1	25	IgG3	0	FALSE	0	0.99	FALSE	1
712	587.262	25	IgG3		1	EEQYNSTFR	EEQYN[25.712]STFR	2	Y	2	1	25	IgG3	0	FALSE	0	0.99	FALSE	1
737	587.262	25	IgG3		1	EEQYNSTFR	EEQYN[25.737]STFR	2	Y	2	1	25	IgG3	0	FALSE	0	0.99	FALSE	1
762	587.262	25	IgG3		1	EEQYNSTFR	EEQYN[25.762]STFR	2	Y	2	1	25	IgG3	0	FALSE	0	0.99	FALSE	1
787	587.262	25	IgG3		1	EEQYNSTFR	EEQYN[25.787]STFR	2	Y	2	1	25	IgG3	0	FALSE	0	0.99	FALSE	1
812	587.262	25	IgG3		1	EEQYNSTFR	EEQYN[25.812]STFR	2	Y	2	1	25	IgG3	0	FALSE	0	0.99	FALSE	1
837	587.262	25	IgG3		1	EEQYNSTFR	EEQYN[25.837]STFR	2	Y	2	1	25	IgG3	0	FALSE	0	0.99	FALSE	1
862	587.262	25	IgG3		1	EEQYNSTFR	EEQYN[25.862]STFR	2	Y	2	1	25	IgG3	0	FALSE	0	0.99	FALSE	1
887	587.262	25	IgG3		1	EEQYNSTFR	EEQYN[25.887]STFR	2	Y	2	1	25	IgG3	0	FALSE	0	0.99	FALSE	1
912	587.262	25	IgG3		1	EEQYNSTFR	EEQYN[25.912]STFR	2	Y	2	1	25	IgG3	0	FALSE	0	0.99	FALSE	1
937	587.262	25	IgG3		1	EEQYNSTFR	EEQYN[25.937]STFR	2	Y	2	1	25	IgG3	0	FALSE	0	0.99	FALSE	1
962	587.262	25	IgG3		1	EEQYNSTFR	EEQYN[25.962]STFR	2	Y	2	1	25	IgG3	0	FALSE	0	0.99	FALSE	1
987	587.262	25	IgG3		1	EEQYNSTFR	EEQYN[25.987]STFR	2	Y	2	1	25	IgG3	0	FALSE	0	0.99	FALSE	1
1012	587.262	25	IgG3		1	EEQYNSTFR	EEQYN[25.1012]STFR	2	Y	2	1	25	IgG3	0	FALSE	0	0.99	FALSE	1
1037	587.262	25	IgG3		1	EEQYNSTFR	EEQYN[25.1037]STFR	2	Y	2	1	25	IgG3	0	FALSE	0	0.99	FALSE	1
1062	587.262	25	IgG3		1	EEQYNSTFR	EEQYN[25.1062]STFR	2	Y	2	1	25	IgG3	0	FALSE	0	0.99	FALSE	1
1087	587.262	25	IgG3		1	EEQYNSTFR	EEQYN[25.1087]STFR	2	Y	2	1	25	IgG3	0	FALSE	0	0.99	FALSE	1
1112	587.262	25	IgG3		1	EEQYNSTFR	EEQYN[25.1112]STFR	2	Y	2	1	25	IgG3	0	FALSE	0	0.99	FALSE	1
1137	587.262	25	IgG3		1	EEQYNSTFR	EEQYN[25.1137]STFR	2	Y	2	1	25	IgG3	0	FALSE	0	0.99	FALSE	1
1162	587.262	25	IgG3		1	EEQYNSTFR	EEQYN[25.1162]STFR	2	Y	2	1	25	IgG3	0	FALSE	0	0.99	FALSE	1
1187	587.262	25	IgG3		1	EEQYNSTFR	EEQYN[25.1187]STFR	2	Y	2	1	25	IgG3	0	FALSE	0	0.99	FALSE	1
1212	587.262	25	IgG3		1	EEQYNSTFR	EEQYN[25.1212]STFR	2	Y	2	1	25	IgG3	0	FALSE	0	0.99	FALSE	1
1237	587.262	25	IgG3		1	EEQYNSTFR	EEQYN[25.1237]STFR	2	Y	2	1	25	IgG3	0	FALSE	0	0.99	FALSE	1
412.5	1173.52	26	IgG3		1	EEQYNSTFR	EEQYN[26.412]STFR	2	Y	1	1	26	IgG3	0	FALSE	0	0.99	FALSE	1
437	1173.52	26	IgG3		1	EEQYNSTFR	EEQYN[26.437]STFR	2	Y	1	1	26	IgG3	0	FALSE	0	0.99	FALSE	1
462	1173.52	26	IgG3		1	EEQYNSTFR	EEQYN[26.462]STFR	2	Y	1	1	26	IgG3	0	FALSE	0	0.99	FALSE	1
487	1173.52	26	IgG3		1	EEQYNSTFR	EEQYN[26.487]STFR	2	Y	1	1	26	IgG3	0	FALSE	0	0.99	FALSE	1
512	1173.52	26	IgG3		1	EEQYNSTFR	EEQYN[26.512]STFR	2	Y	1	1	26	IgG3	0	FALSE	0	0.99	FALSE	1
537	1173.52	26	IgG3		1	EEQYNSTFR	EEQYN[26.537]STFR	2	Y	1	1	26	IgG3	0	FALSE	0	0.99	FALSE	1
562	1173.52	26	IgG3		1	EEQYNSTFR	EEQYN[26.562]STFR	2	Y	1	1	26	IgG3	0	FALSE	0	0.99	FALSE	1
587	1173.52	26	IgG3		1	EEQYNSTFR	EEQYN[26.587]STFR	2	Y	1	1	26	IgG3	0	FALSE	0	0.99	FALSE	1
612	1173.52	26	IgG3		1	EEQYNSTFR	EEQYN[26.612]STFR	2	Y	1	1	26	IgG3	0	FALSE	0	0.99	FALSE	1
637	1173.52	26	IgG3		1	EEQYNSTFR	EEQYN[26.637]STFR	2	Y	1	1	26	IgG3	0	FALSE	0	0.99	FALSE	1
662	1173.52	26	IgG3		1	EEQYNSTFR	EEQYN[26.662]STFR	2	Y	1	1	26	IgG3	0	FALSE	0	0.99	FALSE	1
687	1173.52	26	IgG3		1	EEQYNSTFR	EEQYN[26.687]STFR	2	Y	1	1	26	IgG3	0	FALSE	0	0.99	FALSE	1
712	1173.52	26	IgG3		1	EEQYNSTFR	EEQYN[26.712]STFR	2	Y	1	1	26	IgG3	0	FALSE	0	0.99	FALSE	1
737	1173.52	26	IgG3		1	EEQYNSTFR	EEQYN[26.737]STFR	2	Y	1	1	26	IgG3	0	FALSE	0	0.99	FALSE	1
762	1173.52	26	IgG3		1	EEQYNSTFR	EEQYN[26.762]STFR	2	Y	1	1	26	IgG3	0	FALSE	0	0.99	FALSE	1
787	1173.52	26	IgG3		1	EEQYNSTFR	EEQYN[26.787]STFR	2	Y	1	1	26	IgG3	0	FALSE	0	0.99	FALSE	1
812	1173.52	26	IgG3		1	EEQYNSTFR	EEQYN[26.812]STFR	2	Y	1	1	26	IgG3	0	FALSE	0	0.99	FALSE	1
837	1173.52	26	IgG3		1	EEQYNSTFR	EEQYN[26.837]STFR	2	Y	1	1	26	IgG3	0	FALSE	0	0.99	FALSE	1
862	1173.52	26	IgG3		1	EEQYNSTFR	EEQYN[26.862]STFR	2	Y	1	1	26	IgG3	0	FALSE	0	0.99	FALSE	1
887	1173.52	26	IgG3		1	EEQYNSTFR	EEQYN[26.887]STFR	2	Y	1	1	26	IgG3	0	FALSE	0	0.99	FALSE	1
912	1173.52	26	IgG3		1	EEQYNSTFR	EEQYN[26.912]STFR	2	Y	1	1	26	IgG3	0	FALSE	0	0.99	FALSE	1
937	1173.52	26	IgG3		1	EEQYNSTFR	EEQYN[26.937]STFR	2	Y	1	1	26	IgG3	0	FALSE	0	0.99	FALSE	1
962	1173.52	26	IgG3		1	EEQYNSTFR	EEQYN[26.962]STFR	2	Y	1	1	26	IgG3	0	FALSE	0	0.99	FALSE	1
987	1173.52	26	IgG3		1	EEQYNSTFR	EEQYN[26.987]STFR	2	Y	1	1	26	IgG3	0	FALSE	0	0.99	FALSE	1
1012	1173.52	26	IgG3		1	EEQYNSTFR	EEQYN[26.1012]STFR	2	Y	1	1	26	IgG3	0	FALSE	0	0.99	FALSE	1
1037	1173.52	26	IgG3		1	EEQYNSTFR	EEQYN[26.1037]STFR	2	Y	1	1	26	IgG3	0	FALSE	0	0.99	FALSE	1
1062	1173.52	26	IgG3		1	EEQYNSTFR	EEQYN[26.1062]STFR	2	Y	1	1	26	IgG3	0	FALSE	0	0.99	FALSE	1
1087	1173.52	26	IgG3		1	EEQYNSTFR	EEQYN[26.1087]STFR	2	Y	1	1	26	IgG3	0	FALSE	0	0.99	FALSE	1
1112	1173.52	26	IgG3		1	EEQYNSTFR	EEQYN[26.1112]STFR	2	Y	1	1	26	IgG3	0	FALSE	0	0.99	FALSE	1
1137	1173.52	26	IgG3		1	EEQYNSTFR	EEQYN[26.1137]STFR	2	Y	1	1	26	IgG3	0	FALSE	0	0.99	FALSE	1
1162	1173.52	26	IgG3		1	EEQYNSTFR	EEQYN[26.1162]STFR	2	Y	1	1	26	IgG3	0	FALSE	0	0.99	FALSE	1
1187	1173.52	26	IgG3		1	EEQYNSTFR	EEQYN[26.1187]STFR	2	Y	1	1	26	IgG3	0	FALSE	0	0.99	FALSE	1
1212	1173.52	26	IgG3		1	EEQYNSTFR	EEQYN[26.1212]STFR	2	Y	1	1	26	IgG3	0	FALSE	0	0.99	FALSE	1
1237	1173.52	26	IgG3		1	EEQYNSTFR	EEQYN[26.1237]STFR	2	Y	1	1	26	IgG3	0	FALSE	0	0.99	FALSE	1
412.5	587.262	26	IgG3		1	EEQYNSTFR	EEQYN[26.412]STFR	2	Y	2	1	26	IgG3	0	FALSE	0	0.99	FALSE	1
437	587.262	26	IgG3		1	EEQYNSTFR	EEQYN[26.437]STFR	2	Y	2	1	26	IgG3	0	FALSE	0	0.99	FALSE	1
462	587.262	26	IgG3		1	EEQYNSTFR	EEQYN[26.462]STFR	2	Y	2	1	26	IgG3	0	FALSE	0	0.99	FALSE	1
487	587.262	26	IgG3		1	EEQYNSTFR	EEQYN[26.487]STFR	2	Y	2	1	26	IgG3	0	FALSE	0	0.99	FALSE	1
512	587.262	26	IgG3		1	EEQYNSTFR	EEQYN[26.512]STFR	2	Y	2	1	26	IgG3	0	FALSE	0	0.99	FALSE	1
537	587.262	26	IgG3		1	EEQYNSTFR	EEQYN[26.537]STFR	2	Y	2	1	26	IgG3	0	FALSE	0	0.99	FALSE	1
562	587.262	26	IgG3		1	EEQYNSTFR	EEQYN[26.562]STFR	2	Y	2	1	26	IgG3	0	FALSE	0	0.99	FALSE	1
587	587.262	26	IgG3		1	EEQYNSTFR	EEQYN[26.587]STFR	2	Y	2	1	26	IgG3	0	FALSE	0	0.99	FALSE	1
612	587.262	26	IgG3		1	EEQYNSTFR	EEQYN[26.612]STFR	2	Y	2	1	26	IgG3	0	FALSE	0	0.99	FALSE	1
637	587.262	26	IgG3		1	EEQYNSTFR	EEQYN[26.637]STFR	2	Y	2	1	26	IgG3	0	FALSE	0	0.99	FALSE	1
662	587.262	26	IgG3		1	EEQYNSTFR	EEQYN[26.662]STFR	2	Y	2	1	26	IgG3	0	FALSE	0	0.99	FALSE	1
687	587.262	26	IgG3		1	EEQYNSTFR	EEQYN[26.687]STFR	2	Y	2	1	26	IgG3	0	FALSE	0	0.99	FALSE	1
712	587.262	26	IgG3		1	EEQYNSTFR	EEQYN[26.712]STFR	2	Y	2	1	26	IgG3	0	FALSE	0	0.99	FALSE	1
737	587.262	26	IgG3		1	EEQYNSTFR	EEQYN[26.737]STFR	2	Y	2	1	26	IgG3	0	FALSE	0	0.99	FALSE	1
762	587.262	26	IgG3		1	EEQYNSTFR	EEQYN[26.762]STFR	2	Y	2	1	26	IgG3	0	FALSE	0	0.99	FALSE	1
787	587.262	26	IgG3		1	EEQYNSTFR	EEQYN[26.787]STFR	2	Y	2	1	26	IgG3	0	FALSE	0	0.99	FALSE	1
812	587.262	26	IgG3		1	EEQYNSTFR	EEQYN[26.812]STFR	2	Y	2	1	26	IgG3	0	FALSE	0	0.99	FALSE	1
837	587.262	26	IgG3		1	EEQYNSTFR	EEQYN[26.837]STFR	2	Y	2	1	26	IgG3	0	FALSE	0	0.99	FALSE	1
862	587.262	26	IgG3		1	EEQYNSTFR	EEQYN[26.862]STFR	2	Y	2	1	26	IgG3	0	FALSE	0	0.99	FALSE	1
887	587.262	26	IgG3		1	EEQYNSTFR	EEQYN[26.887]STFR	2	Y	2	1	26	IgG3	0	FALSE	0	0.99	FALSE	1
912	587.262	26	IgG3		1	EEQYNSTFR	EEQYN[26.912]STFR	2	Y	2	1	26	IgG3	0	FALSE	0	0.99	FALSE	1
937	587.262	26	IgG3		1	EEQYNSTFR	EEQYN[26.937]STFR	2	Y	2	1	26	IgG3	0	FALSE	0	0.99	FALSE	1
962	587.262	26	IgG3		1	EEQYNSTFR	EEQYN[26.962]STFR	2	Y	2	1	26	IgG3	0	FALSE	0	0.99	FALSE	1
987	587.262	26	IgG3		1	EEQYNSTFR	EEQYN[26.987]STFR	2	Y	2	1	26	IgG3	0	FALSE	0	0.99	FALSE	1
1012	587.262	26	IgG3		1	EEQYNSTFR	EEQYN[26.1012]STFR	2	Y	2	1	26	IgG3	0	FALSE	0	0.99	FALSE	1
1037	587.262	26	IgG3		1	EEQYNSTFR	EEQYN[26.1037]STFR	2	Y	2	1	26	IgG3	0	FALSE	0	0.99	FALSE	1
1062	587.262	26	IgG3		1	EEQYNSTFR	EEQYN[26.1062]STFR	2	Y	2	1	26	IgG3	0	FALSE	0	0.99	FALSE	1
1087	587.262	26	IgG3		1	EEQYNSTFR	EEQYN[26.1087]STFR	2	Y	2	1	26	IgG3	0	FALSE	0	0.99	FALSE	1
1112	587.262	26	IgG3		1	EEQYNSTFR	EEQYN[26.1112]STFR	2	Y	2	1	26	IgG3	0	FALSE	0	0.99	FALSE	1
1137	587.262	26	IgG3		1	EEQYNSTFR	EEQYN[26.1137]STFR	2	Y	2	1	26	IgG3	0	FALSE	0	0.99	FALSE	1
1162	587.262	26	IgG3		1	EEQYNSTFR	EEQYN[26.1162]STFR	2	Y	2	1	26	IgG3	0	FALSE	0	0.99	FALSE	1
1187	587.262	26	IgG3		1	EEQYNSTFR	EEQYN[26.1187]STFR	2	Y	2	1	26	IgG3	0	FALSE	0	0.99	FALSE	1
1212	587.262	26	IgG3		1	EEQYNSTFR	EEQYN[26.1212]STFR	2	Y	2	1	26	IgG3	0	FALSE	0	0.99	FALSE	1
1237	587.262	26	IgG3		1	EEQYNSTFR	EEQYN[26.1237]STFR	2	Y	2	1	26	IgG3	0	FALSE	0	0.99	FALSE	1
412.5	1173.52	27	IgG3		1	EEQYNSTFR	EEQYN[27.412]STFR	2	Y	1	1	27	IgG3	0	FALSE	0	0.99	FALSE	1
437	1173.52	27	IgG3		1	EEQYNSTFR	EEQYN[27.437]STFR	2	Y	1	1	27	IgG3	0	FALSE	0	0.99	FALSE	1
462	1173.52	27	IgG3		1	EEQYNSTFR	EEQYN[27.462]STFR	2	Y	1	1	27	IgG3	0	FALSE	0	0.99	FALSE	1
487	1173.52	27	IgG3		1	EEQYNSTFR	EEQYN[27.487]STFR	2	Y	1	1	27	IgG3	0	FALSE	0	0.99	FALSE	1
512	1173.52	27	IgG3		1	EEQYNSTFR	EEQYN[27.512]STFR	2	Y	1	1	27	IgG3	0	FALSE	0	0.99	FALSE	1
537	1173.52	27	IgG3		1	EEQYNSTFR	EEQYN[27.537]STFR	2	Y	1	1	27	IgG3	0	FALSE	0	0.99	FALSE	1
562	1173.52	27	IgG3		1	EEQYNSTFR	EEQYN[27.562]STFR	2	Y	1	1	27	IgG3	0	FALSE	0	0.99	FALSE	1
587	1173.52	27	IgG3		1	EEQYNSTFR	EEQYN[27.587]STFR	2	Y	1	1	27	IgG3	0	FALSE	0	0.99	FALSE	1
612	1173.52	27	IgG3		1	EEQYNSTFR	EEQYN[27.612]STFR	2	Y	1	1	27	IgG3	0	FALSE	0	0.99	FALSE	1
637	1173.52	27	IgG3		1	EEQYNSTFR	EEQYN[27.637]STFR	2	Y	1	1	27	IgG3	0	FALSE	0	0.99	FALSE	1
662	1173.52	27	IgG3		1	EEQYNSTFR	EEQYN[27.662]STFR	2	Y	1	1	27	IgG3	0	FALSE	0	0.99	FALSE	1
687	1173.52	27	IgG3		1	EEQYNSTFR	EEQYN[27.687]STFR	2	Y	1	1	27	IgG3	0	FALSE	0	0.99	FALSE	1
712	1173.52	27	IgG3		1	EEQYNSTFR	EEQYN[27.712]STFR	2	Y	1	1	27	IgG3	0	FALSE	0	0.99	FALSE	1
737	1173.52	27	IgG3		1	EEQYNSTFR	EEQYN[27.737]STFR	2	Y	1	1	27	IgG3	0	FALSE	0	0.99	FALSE	1
762	1173.52	27	IgG3		1	EEQYNSTFR	EEQYN[27.762]STFR	2	Y	1	1	27	IgG3	0	FALSE	0	0.99	FALSE	1
787	1173.52	27	IgG3		1	EEQYNSTFR	EEQYN[27.787]STFR	2	Y	1	1	27	IgG3	0	FALSE	0	0.99	FALSE	1
812	1173.52	27	IgG3		1	EEQYNSTFR	EEQYN[27.812]STFR	2	Y	1	1	27	IgG3	0	FALSE	0	0.99	FALSE	1
837	1173.52	27	IgG3		1	EEQYNSTFR	EEQYN[27.837]STFR	2	Y	1	1	27	IgG3	0	FALSE	0	0.99	FALSE	1
862	1173.52	27	IgG3		1	EEQYNSTFR	EEQYN[27.862]STFR	2	Y	1	1	27	IgG3	0	FALSE	0	0.99	FALSE	1
887	1173.52	27	IgG3		1	EEQYNSTFR	EEQYN[27.887]STFR	2	Y	1	1	27	IgG3	0	FALSE	0	0.99	FALSE	1
912	1173.52	27	IgG3		1	EEQYNSTFR	EEQYN[27.912]STFR	2	Y	1	1	27	IgG3	0	FALSE	0	0.99	FALSE	1
937	1173.52	27	IgG3		1	EEQYNSTFR	EEQYN[27.937]STFR	2	Y	1	1	27	IgG3	0	FALSE	0	0.99	FALSE	1
962	1173.52	27	IgG3		1	EEQYNSTFR	EEQYN[27.962]STFR	2	Y	1	1	27	IgG3	0	FALSE	0	0.99	FALSE	1
987	1173.52	27	IgG3		1	EEQYNSTFR	EEQYN[27.987]STFR	2	Y	1	1	27	IgG3	0	FALSE	0	0.99	FALSE	1
1012	1173.52	27	IgG3		1	EEQYNSTFR	EEQYN[27.1012]STFR	2	Y	1	1	27	IgG3	0	FALSE	0	0.99	FALSE	1
1037	1173.52	27	IgG3		1	EEQYNSTFR	EEQYN[27.1037]STFR	2	Y	1	1	27	IgG3	0	FALSE	0	0.99	FALSE	1
1062	1173.52	27	IgG3		1	EEQYNSTFR	EEQYN[27.1062]STFR	2	Y	1	1	27	IgG3	0	FALSE	0	0.99	FALSE	1
1087	1173.52	27	IgG3		1	EEQYNSTFR	EEQYN[27.1087]STFR	2	Y	1	1	27	IgG3	0	FALSE	0	0.99	FALSE	1
1112	1173.52	27	IgG3		1	EEQYNSTFR	EEQYN[27.1112]STFR	2	Y	1	1	27	IgG3	0	FALSE	0	0.99	FALSE	1
1137	1173.52	27	IgG3		1	EEQYNSTFR	EEQYN[27.1137]STFR	2	Y	1	1	27	IgG3	0	FALSE	0	0.99	FALSE	1
1162	1173.52	27	IgG3		1	EEQYNSTFR	EEQYN[27.1162]STFR	2	Y	1	1	27	IgG3	0	FALSE	0	0.99	FALSE	1
1187	1173.52	27	IgG3		1	EEQYNSTFR	EEQYN[27.1187]STFR	2	Y	1	1	27	IgG3	0	FALSE	0	0.99	FALSE	1
1212	1173.52	27	IgG3		1	EEQYNSTFR	EEQYN[27.1212]STFR	2	Y	1	1	27	IgG3	0	FALSE	0	0.99	FALSE	1
1237	1173.52	27	IgG3		1	EEQYNSTFR	EEQYN[27.1237]STFR	2	Y	1	1	27	IgG3	0	FALSE	0	0.99	FALSE	1
412.5	587.262	27	IgG3		1	EEQYNSTFR	EEQYN[27.412]STFR	2	Y	2	1	27	IgG3	0	FALSE	0	0.99	FALSE	1
437	587.262	27	IgG3		1	EEQYNSTFR	EEQYN[27.437]STFR	2	Y	2	1	27	IgG3	0	FALSE	0	0.99	FALSE	1
462	587.262	27	IgG3		1	EEQYNSTFR	EEQYN[27.462]STFR	2	Y	2	1	27	IgG3	0	FALSE	0	0.99	FALSE	1
487	587.262	27	IgG3		1	EEQYNSTFR	EEQYN[27.487]STFR	2	Y	2	1	27	IgG3	0	FALSE	0	0.99	FALSE	1
512	587.262	27	IgG3		1	EEQYNSTFR	EEQYN[27.512]STFR	2	Y	2	1	27	IgG3	0	FALSE	0	0.99	FALSE	1
537	587.262	27	IgG3		1	EEQYNSTFR	EEQYN[27.537]STFR	2	Y	2	1	27	IgG3	0	FALSE	0	0.99	FALSE	1
562	587.262	27	IgG3		1	EEQYNSTFR	EEQYN[27.562]STFR	2	Y	2	1	27	IgG3	0	FALSE	0	0.99	FALSE	1
587	587.262	27	IgG3		1	EEQYNSTFR	EEQYN[27.587]STFR	2	Y	2	1	27	IgG3	0	FALSE	0	0.99	FALSE	1
612	587.262	27	IgG3		1	EEQYNSTFR	EEQYN[27.612]STFR	2	Y	2	1	27	IgG3	0	FALSE	0	0.99	FALSE	1
637	587.262	27	IgG3		1	EEQYNSTFR	EEQYN[27.637]STFR	2	Y	2	1	27	IgG3	0	FALSE	0	0.99	FALSE	1
662	587.262	27	IgG3		1	EEQYNSTFR	EEQYN[27.662]STFR	2	Y	2	1	27	IgG3	0	FALSE	0	0.99	FALSE	1
687	587.262	27	IgG3		1	EEQYNSTFR	EEQYN[27.687]STFR	2	Y	2	1	27	IgG3	0	FALSE	0	0.99	FALSE	1
712	587.262	27	IgG3		1	EEQYNSTFR	EEQYN[27.712]STFR	2	Y	2	1	27	IgG3	0	FALSE	0	0.99	FALSE	1
737	587.262	27	IgG3		1	EEQYNSTFR	EEQYN[27.737]STFR	2	Y	2	1	27	IgG3	0	FALSE	0	0.99	FALSE	1
762	587.262	27	IgG3		1	EEQYNSTFR	EEQYN[27.762]STFR	2	Y	2	1	27	IgG3	0	FALSE	0	0.99	FALSE	1
787	587.262	27	IgG3		1	EEQYNSTFR	EEQYN[27.787]STFR	2	Y	2	1	27	IgG3	0	FALSE	0	0.99	FALSE	1
812	587.262	27	IgG3		1	EEQYNSTFR	EEQYN[27.812]STFR	2	Y	2	1	27	IgG3	0	FALSE	0	0.99	FALSE	1
837	587.262	27	IgG3		1	EEQYNSTFR	EEQYN[27.837]STFR	2	Y	2	1	27	IgG3	0	FALSE	0	0.99	FALSE	1
862	587.262	27	IgG3		1	EEQYNSTFR	EEQYN[27.862]STFR	2	Y	2	1	27	IgG3	0	FALSE	0	0.99	FALSE	1
887	587.262	27	IgG3		1	EEQYNSTFR	EEQYN[27.887]STFR	2	Y	2	1	27	IgG3	0	FALSE	0	0.99	FALSE	1
912	587.262	27	IgG3		1	EEQYNSTFR	EEQYN[27.912]STFR	2	Y	2	1	27	IgG3	0	FALSE	0	0.99	FALSE	1
937	587.262	27	IgG3		1	EEQYNSTFR	EEQYN[27.937]STFR	2	Y	2	1	27	IgG3	0	FALSE	0	0.99	FALSE	1
962	587.262	27	IgG3		1	EEQYNSTFR	EEQYN[27.962]STFR	2	Y	2	1	27	IgG3	0	FALSE	0	0.99	FALSE	1
987	587.262	27	IgG3		1	EEQYNSTFR	EEQYN[27.987]STFR	2	Y	2	1	27	IgG3	0	FALSE	0	0.99	FALSE	1
1012	587.262	27	IgG3		1	EEQYNSTFR	EEQYN[27.1012]STFR	2	Y	2	1	27	IgG3	0	FALSE	0	0.99	FALSE	1
1037	587.262	27	IgG3		1	EEQYNSTFR	EEQYN[27.1037]STFR	2	Y	2	1	27	IgG3	0	FALSE	0	0.99	FALSE	1
1062	587.262	27	IgG3		1	EEQYNSTFR	EEQYN[27.1062]STFR	2	Y	2	1	27	IgG3	0	FALSE	0	0.99	FALSE	1
1087	587.262	27	IgG3		1	EEQYNSTFR	EEQYN[27.1087]STFR	2	Y	2	1	27	IgG3	0	FALSE	0	0.99	FALSE	1
1112	587.262	27	IgG3		1	EEQYNSTFR	EEQYN[27.1112]STFR	2	Y	2	1	27	IgG3	0	FALSE	0	0.99	FALSE	1
1137	587.262	27	IgG3		1	EEQYNSTFR	EEQYN[27.1137]STFR	2	Y	2	1	27	IgG3	0	FALSE	0	0.99	FALSE	1
1162	587.262	27	IgG3		1	EEQYNSTFR	EEQYN[27.1162]STFR	2	Y	2	1	27	IgG3	0	FALSE	0	0.99	FALSE	1
1187	587.262	27	IgG3		1	EEQYNSTFR	EEQYN[27.1187]STFR	2	Y	2	1	27	IgG3	0	FALSE	0	0.99	FALSE	1
1212	587.262	27	IgG3		1	EEQYNSTFR	EEQYN[27.1212]STFR	2	Y	2	1	27	IgG3	0	FALSE	0	0.99	FALSE	1
1237	587.262	27	IgG3		1	EEQYNSTFR	EEQYN[27.1237]STFR	2	Y	2	1	27	IgG3	0	FALSE	0	0.99	FALSE	1
412.5	1173.52	28	IgG3		1	EEQYNSTFR	EEQYN[28.412]STFR	2	Y	1	1	28	IgG3	0	FALSE	0	0.99	FALSE	1
437	1173.52	28	IgG3		1	EEQYNSTFR	EEQYN[28.437]STFR	2	Y	1	1	28	IgG3	0	FALSE	0	0.99	FALSE	1
462	1173.52	28	IgG3		1	EEQYNSTFR	EEQYN[28.462]STFR	2	Y	1	1	28	IgG3	0	FALSE	0	0.99	FALSE	1
487	1173.52	28	IgG3		1	EEQYNSTFR	EEQYN[28.487]STFR	2	Y	1	1	28	IgG3	0	FALSE	0	0.99	FALSE	1
512	1173.52	28	IgG3		1	EEQYNSTFR	EEQYN[28.512]STFR	2	Y	1	1	28	IgG3	0	FALSE	0	0.99	FALSE	1
537	1173.52	28	IgG3		1	EEQYNSTFR	EEQYN[28.537]STFR	2	Y	1	1	28	IgG3	0	FALSE	0	0.99	FALSE	1
562	1173.52	28	IgG3		1	EEQYNSTFR	EEQYN[28.562]STFR	2	Y	1	1	28	IgG3	0	FALSE	0	0.99	FALSE	1
587	1173.52	28	IgG3		1	EEQYNSTFR	EEQYN[28.587]STFR	2	Y	1	1	28	IgG3	0	FALSE	0	0.99	FALSE	1
612	1173.52	28	IgG3		1	EEQYNSTFR	EEQYN[28.612]STFR	2	Y	1	1	28	IgG3	0	FALSE	0	0.99	FALSE	1
637	1173.52	28	IgG3		1	EEQYNSTFR	EEQYN[28.637]STFR	2	Y	1	1	28	IgG3	0	FALSE	0	0.99	FALSE	1
662	1173.52	28	IgG3		1	EEQYNSTFR	EEQYN[28.662]STFR	2	Y	1	1	28	IgG3	0	FALSE	0	0.99	FALSE	1
687	1173.52	28	IgG3		1	EEQYNSTFR	EEQYN[28.687]STFR	2	Y	1	1	28	IgG3	0	FALSE	0	0.99	FALSE	1
712	1173.52	28	IgG3		1	EEQYNSTFR	EEQYN[28.712]STFR	2	Y	1	1	28	IgG3	0	FALSE	0	0.99	FALSE	1
737	1173.52	28	IgG3		1	EEQYNSTFR	EEQYN[28.737]STFR	2	Y	1	1	28	IgG3	0	FALSE	0	0.99	FALSE	1
762	1173.52	28	IgG3		1	EEQYNSTFR	EEQYN[28.762]STFR	2	Y	1	1	28	IgG3	0	FALSE	0	0.99	FALSE	1
787	1173.52	28	IgG3		1	EEQYNSTFR	EEQYN[28.787]STFR	2	Y	1	1	28	IgG3	0	FALSE	0	0.99	FALSE	1
812	1173.52	28	IgG3		1	EEQYNSTFR	EEQYN[28.812]STFR	2	Y	1	1	28	IgG3	0	FALSE	0	0.99	FALSE	1
837	1173.52	28	IgG3		1	EEQYNSTFR	EEQYN[28.837]STFR	2	Y	1	1	28	IgG3	0	FALSE	0	0.99	FALSE	1
862	1173.52	28	IgG3		1	EEQYNSTFR	EEQYN[28.862]STFR	2	Y	1	1	28	IgG3	0	FALSE	0	0.99	FALSE	1
887	1173.52	28	IgG3		1	EEQYNSTFR	EEQYN[28.887]STFR	2	Y	1	1	28	IgG3	0	FALSE	0	0.99	FALSE	1
912	1173.52	28	IgG3		1	EEQYNSTFR	EEQYN[28.912]STFR	2	Y	1	1	28	IgG3	0	FALSE	0	0.99	FALSE	1
937	1173.52	28	IgG3		1	EEQYNSTFR	EEQYN[28.937]STFR	2	Y	1	1	28	IgG3	0	FALSE	0	0.99	FALSE	1
962	1173.52	28	IgG3		1	EEQYNSTFR	EEQYN[28.962]STFR	2	Y	1	1	28	IgG3	0	FALSE	0	0.99	FALSE	1
987	1173.52	28	IgG3		1	EEQYNSTFR	EEQYN[28.987]STFR	2	Y	1	1	28	IgG3	0	FALSE	0	0.99	FALSE	1
1012	1173.52	28	IgG3		1	EEQYNSTFR	EEQYN[28.1012]STFR	2	Y	1	1	28	IgG3	0	FALSE	0	0.99	FALSE	1
1037	1173.52	28	IgG3		1	EEQYNSTFR	EEQYN[28.1037]STFR	2	Y	1	1	28	IgG3	0	FALSE	0	0.99	FALSE	1
1062	1173.52	28	IgG3		1	EEQYNSTFR	EEQYN[28.1062]STFR	2	Y	1	1	28	IgG3	0	FALSE	0	0.99	FALSE	1
1087	1173.52	28	IgG3		1	EEQYNSTFR	EEQYN[28.1087]STFR	2	Y	1	1	28	IgG3	0	FALSE	0	0.99	FALSE	1
1112	1173.52	28	IgG3		1	EEQYNSTFR	EEQYN[28.1112]STFR	2	Y	1	1	28	IgG3	0	FALSE	0	0.99	FALSE	1
1137	1173.52	28	IgG3		1	EEQYNSTFR	EEQYN[28.1137]STFR	2	Y	1	1	28	IgG3	0	FALSE	0	0.99	FALSE	1
1162	1173.52	28	IgG3		1	EEQYNSTFR	EEQYN[28.1162]STFR	2	Y	1	1	28	IgG3	0	FALSE	0	0.99	FALSE	1
1187	1173.52	28	IgG3		1	EEQYNSTFR	EEQYN[28.1187]STFR	2	Y	1	1	28	IgG3	0	FALSE	0	0.99	FALSE	1
1212	1173.52	28	IgG3		1	EEQYNSTFR	EEQYN[28.1212]STFR	2	Y	1	1	28	IgG3	0	FALSE	0	0.99	FALSE	1
1237	1173.52	28	IgG3		1	EEQYNSTFR	EEQYN[28.1237]STFR	2	Y	1	1	28	IgG3	0	FALSE	0	0.99	FALSE	1
412.5	587.262	28	IgG3		1	EEQYNSTFR	EEQYN[28.412]STFR	2	Y	2	1	28	IgG3	0	FALSE	0	0.99	FALSE	1
437	587.262	28	IgG3		1	EEQYNSTFR	EEQYN[28.437]STFR	2	Y	2	1	28	IgG3	0	FALSE	0	0.99	FALSE	1
462	587.262	28	IgG3		1	EEQYNSTFR	EEQYN[28.462]STFR	2	Y	2	1	28	IgG3	0	FALSE	0	0.99	FALSE	1
487	587.262	28	IgG3		1	EEQYNSTFR	EEQYN[28.487]STFR	2	Y	2	1	28	IgG3	0	FALSE	0	0.99	FALSE	1
512	587.262	28	IgG3		1	EEQYNSTFR	EEQYN[28.512]STFR	2	Y	2	1	28	IgG3	0	FALSE	0	0.99	FALSE	1
537	587.262	28	IgG3		1	EEQYNSTFR	EEQYN[28.537]STFR	2	Y	2	1	28	IgG3	0	FALSE	0	0.99	FALSE	1
562	587.262	28	IgG3		1	EEQYNSTFR	EEQYN[28.562]STFR	2	Y	2	1	28	IgG3	0	FALSE	0	0.99	FALSE	1
587	587.262	28	IgG3		1	EEQYNSTFR	EEQYN[28.587]STFR	2	Y	2	1	28	IgG3	0	FALSE	0	0.99	FALSE	1
612	587.262	28	IgG3		1	EEQYNSTFR	EEQYN[28.612]STFR	2	Y	2	1	28	IgG3	0	FALSE	0	0.99	FALSE	1
637	587.262	28	IgG3		1	EEQYNSTFR	EEQYN[28.637]STFR	2	Y	2	1	28	IgG3	0	FALSE	0	0.99	FALSE	1
662	587.262	28	IgG3		1	EEQYNSTFR	EEQYN[28.662]STFR	2	Y	2	1	28	IgG3	0	FALSE	0	0.99	FALSE	1
687	587.262	28	IgG3		1	EEQYNSTFR	EEQYN[28.687]STFR	2	Y	2	1	28	IgG3	0	FALSE	0	0.99	FALSE	1
712	587.262	28	IgG3		1	EEQYNSTFR	EEQYN[28.712]STFR	2	Y	2	1	28	IgG3	0	FALSE	0	0.99	FALSE	1
737	587.262	28	IgG3		1	EEQYNSTFR	EEQYN[28.737]STFR	2	Y	2	1	28	IgG3	0	FALSE	0	0.99	FALSE	1
762	587.262	28	IgG3		1	EEQYNSTFR	EEQYN[28.762]STFR	2	Y	2	1	28	IgG3	0	FALSE	0	0.99	FALSE	1
787	587.262	28	IgG3		1	EEQYNSTFR	EEQYN[28.787]STFR	2	Y	2	1	28	IgG3	0	FALSE	0	0.99	FALSE	1
812	587.262	28	IgG3		1	EEQYNSTFR	EEQYN[28.812]STFR	2	Y	2	1	28	IgG3	0	FALSE	0	0.99	FALSE	1
837	587.262	28	IgG3		1	EEQYNSTFR	EEQYN[28.837]STFR	2	Y	2	1	28	IgG3	0	FALSE	0	0.99	FALSE	1
862	587.262	28	IgG3		1	EEQYNSTFR	EEQYN[28.862]STFR	2	Y	2	1	28	IgG3	0	FALSE	0	0.99	FALSE	1
887	587.262	28	IgG3		1	EEQYNSTFR	EEQYN[28.887]STFR	2	Y	2	1	28	IgG3	0	FALSE	0	0.99	FALSE	1
912	587.262	28	IgG3		1	EEQYNSTFR	EEQYN[28.912]STFR	2	Y	2	1	28	IgG3	0	FALSE	0	0.99	FALSE	1
937	587.262	28	IgG3		1	EEQYNSTFR	EEQYN[28.937]STFR	2	Y	2	1	28	IgG3	0	FALSE	0	0.99	FALSE	1
962	587.262	28	IgG3		1	EEQYNSTFR	EEQYN[28.962]STFR	2	Y	2	1	28	IgG3	0	FALSE	0	0.99	FALSE	1
987	587.262	28	IgG3		1	EEQYNSTFR	EEQYN[28.987]STFR	2	Y	2	1	28	IgG3	0	FALSE	0	0.99	FALSE	1
1012	587.262	28	IgG3		1	EEQYNSTFR	EEQYN[28.1012]STFR	2	Y	2	1	28	IgG3	0	FALSE	0	0.99	FALSE	1
1037	587.262	28	IgG3		1	EEQYNSTFR	EEQYN[28.1037]STFR	2	Y	2	1	28	IgG3	0	FALSE	0	0.99	FALSE	1
1062	587.262	28	IgG3		1	EEQYNSTFR	EEQYN[28.1062]STFR	2	Y	2	1	28	IgG3	0	FALSE	0	0.99	FALSE	1
1087	587.262	28	IgG3		1	EEQYNSTFR	EEQYN[28.1087]STFR	2	Y	2	1	28	IgG3	0	FALSE	0	0.99	FALSE	1
1112	587.262	28	IgG3		1	EEQYNSTFR	EEQYN[28.1112]STFR	2	Y	2	1	28	IgG3	0	FALSE	0	0.99	FALSE	1
1137	587.262	28	IgG3		1	EEQYNSTFR	EEQYN[28.1137]STFR	2	Y	2	1	28	IgG3	0	FALSE	0	0.99	FALSE	1
1162	587.262	28	IgG3		1	EEQYNSTFR	EEQYN[28.1162]STFR	2	Y	2	1	28	IgG3	0	FALSE	0	0.99	FALSE	1
1187	587.262	28	IgG3		1	EEQYNSTFR	EEQYN[28.1187]STFR	2	Y	2	1	28	IgG3	0	FALSE	0	0.99	FALSE	1
1212	587.262	28	IgG3		1	EEQYNSTFR	EEQYN[28.1212]STFR	2	Y	2	1	28	IgG3	0	FALSE	0	0.99	FALSE	1
1237	587.262	28	IgG3		1	EEQYNSTFR	EEQYN[28.1237]STFR	2	Y	2	1	28	IgG3	0	FALSE	0	0.99	FALSE	1
412.5	1173.52	29	IgG3		1	EEQYNSTFR	EEQYN[29.412]STFR	2	Y	1	1	29	IgG3	0	FALSE	0	0.99	FALSE	1
437	1173.52	29	IgG3		1	EEQYNSTFR	EEQYN[29.437]STFR	2	Y	1	1	29	IgG3	0	FALSE	0	0.99	FALSE	1
462	1173.52	29	IgG3		1	EEQYNSTFR	EEQYN[29.462]STFR	2	Y	1	1	29	IgG3	0	FALSE	0	0.99	FALSE	1
487	1173.52	29	IgG3		1	EEQYNSTFR	EEQYN[29.487]STFR	2	Y	1	1	29	IgG3	0	FALSE	0	0.99	FALSE	1
512	1173.52	29	IgG3		1	EEQYNSTFR	EEQYN[29.512]STFR	2	Y	1	1	29	IgG3	0	FALSE	0	0.99	FALSE	1
537	1173.52	29	IgG3		1	EEQYNSTFR	EEQYN[29.537]STFR	2	Y	1	1	29	IgG3	0	FALSE	0	0.99	FALSE	1
562	1173.52	29	IgG3		1	EEQYNSTFR	EEQYN[29.562]STFR	2	Y	1	1	29	IgG3	0	FALSE	0	0.99	FALSE	1
587	1173.52	29	IgG3		1	EEQYNSTFR	EEQYN[29.587]STFR	2	Y	1	1	29	IgG3	0	FALSE	0	0.99	FALSE	1
612	1173.52	29	IgG3		1	EEQYNSTFR	EEQYN[29.612]STFR	2	Y	1	1	29	IgG3	0	FALSE	0	0.99	FALSE	1
637	1173.52	29	IgG3		1	EEQYNSTFR	EEQYN[29.637]STFR	2	Y	1	1	29	IgG3	0	FALSE	0	0.99	FALSE	1
662	1173.52	29	IgG3		1	EEQYNSTFR	EEQYN[29.662]STFR	2	Y	1	1	29	IgG3	0	FALSE	0	0.99	FALSE	1
687	1173.52	29	IgG3		1	EEQYNSTFR	EEQYN[29.687]STFR	2	Y	1	1	29	IgG3	0	FALSE	0	0.99	FALSE	1
712	1173.52	29	IgG3		1	EEQYNSTFR	EEQYN[29.712]STFR	2	Y	1	1	29	IgG3	0	FALSE	0	0.99	FALSE	1
737	1173.52	29	IgG3		1	EEQYNSTFR	EEQYN[29.737]STFR	2	Y	1	1	29	IgG3	0	FALSE	0	0.99	FALSE	1
762	1173.52	29	IgG3		1	EEQYNSTFR	EEQYN[29.762]STFR	2	Y	1	1	29	IgG3	0	FALSE	0	0.99	FALSE	1
787	1173.52	29	IgG3		1	EEQYNSTFR	EEQYN[29.787]STFR	2	Y	1	1	29	IgG3	0	FALSE	0	0.99	FALSE	1
812	1173.52	29	IgG3		1	EEQYNSTFR	EEQYN[29.812]STFR	2	Y	1	1	29	IgG3	0	FALSE	0	0.99	FALSE	1
837	1173.52	29	IgG3		1	EEQYNSTFR	EEQYN[29.837]STFR	2	Y	1	1	29	IgG3	0	FALSE	0	0.99	FALSE	1
862	1173.52	29	IgG3		1	EEQYNSTFR	EEQYN[29.862]STFR	2	Y	1	1	29	IgG3	0	FALSE	0	0.99	FALSE	1
887	1173.52	29	IgG3		1	EEQYNSTFR	EEQYN[29.887]STFR	2	Y	1	1	29	IgG3	0	FALSE	0	0.99	FALSE	1
912	1173.52	29	IgG3		1	EEQYNSTFR	EEQYN[29.912]STFR	2	Y	1	1	29	IgG3	0	FALSE	0	0.99	FALSE	1
937	1173.52	29	IgG3		1	EEQYNSTFR	EEQYN[29.937]STFR	2	Y	1	1	29	IgG3	0	FALSE	0	0.99	FALSE	1
962	1173.52	29	IgG3		1	EEQYNSTFR	EEQYN[29.962]STFR	2	Y	1	1	29	IgG3	0	FALSE	0	0.99	FALSE	1
987	1173.52	29	IgG3		1	EEQYNSTFR	EEQYN[29.987]STFR	2	Y	1	1	29	IgG3	0	FALSE	0	0.99	FALSE	1
1012	1173.52	29	IgG3		1	EEQYNSTFR	EEQYN[29.1012]STFR	2	Y	1	1	29	IgG3	0	FALSE	0	0.99	FALSE	1
1037	1173.52	29	IgG3		1	EEQYNSTFR	EEQYN[29.1037]STFR	2	Y	1	1	29	IgG3	0	FALSE	0	0.99	FALSE	1
1062	1173.52	29	IgG3		1	EEQYNSTFR	EEQYN[29.1062]STFR	2	Y	1	1	29	IgG3	0	FALSE	0	0.99	FALSE	1
1087	1173.52	29	IgG3		1	EEQYNSTFR	EEQYN[29.1087]STFR	2	Y	1	1	29	IgG3	0	FALSE	0	0.99	FALSE	1
1112	1173.52	29	IgG3		1	EEQYNSTFR	EEQYN[29.1112]STFR	2	Y	1	1	29	IgG3	0	FALSE	0	0.99	FALSE	1
1137	1173.52	29	IgG3		1	EEQYNSTFR	EEQYN[29.1137]STFR	2	Y	1	1	29	IgG3	0	FALSE	0	0.99	FALSE	1
1162	1173.52	29	IgG3		1	EEQYNSTFR	EEQYN[29.1162]STFR	2	Y	1	1	29	IgG3	0	FALSE	0	0.99	FALSE	1
1187	1173.52	29	IgG3		1	EEQYNSTFR	EEQYN[29.1187]STFR	2	Y	1	1	29	IgG3	0	FALSE	0	0.99	FALSE	1
1212	1173.52	29	IgG3		1	EEQYNSTFR	EEQYN[29.1212]STFR	2	Y	1	1	29	IgG3	0	FALSE	0	0.99	FALSE	1
1237	1173.52	29	IgG3		1	EEQYNSTFR	EEQYN[29.1237]STFR	2	Y	1	1	29	IgG3	0	FALSE	0	0.99	FALSE	1
412.5	587.262	29	IgG3		1	EEQYNSTFR	EEQYN[29.412]STFR	2	Y	2	1	29	IgG3	0	FALSE	0	0.99	FALSE	1
437	587.262	29	IgG3		1	EEQYNSTFR	EEQYN[29.437]STFR	2	Y	2	1	29	IgG3	0	FALSE	0	0.99	FALSE	1
462	587.262	29	IgG3		1	EEQYNSTFR	EEQYN[29.462]STFR	2	Y	2	1	29	IgG3	0	FALSE	0	0.99	FALSE	1
487	587.262	29	IgG3		1	EEQYNSTFR	EEQYN[29.487]STFR	2	Y	2	1	29	IgG3	0	FALSE	0	0.99	FALSE	1
512	587.262	29	IgG3		1	EEQYNSTFR	EEQYN[29.512]STFR	2	Y	2	1	29	IgG3	0	FALSE	0	0.99	FALSE	1
537	587.262	29	IgG3		1	EEQYNSTFR	EEQYN[29.537]STFR	2	Y	2	1	29	IgG3	0	FALSE	0	0.99	FALSE	1
562	587.262	29	IgG3		1	EEQYNSTFR	EEQYN[29.562]STFR	2	Y	2	1	29	IgG3	0	FALSE	0	0.99	FALSE	1
587	587.262	29	IgG3		1	EEQYNSTFR	EEQYN[29.587]STFR	2	Y	2	1	29	IgG3	0	FALSE	0	0.99	FALSE	1
612	587.262	29	IgG3		1	EEQYNSTFR	EEQYN[29.612]STFR	2	Y	2	1	29	IgG3	0	FALSE	0	0.99	FALSE	1
637	587.262	29	IgG3		1	EEQYNSTFR	EEQYN[29.637]STFR	2	Y	2	1	29	IgG3	0	FALSE	0	0.99	FALSE	1
662	587.262	29	IgG3		1	EEQYNSTFR	EEQYN[29.662]STFR	2	Y	2	1	29	IgG3	0	FALSE	0	0.99	FALSE	1
687	587.262	29	IgG3		1	EEQYNSTFR	EEQYN[29.687]STFR	2	Y	2	1	29	IgG3	0	FALSE	0	0.99	FALSE	1
712	587.262	29	IgG3		1	EEQYNSTFR	EEQYN[29.712]STFR	2	Y	2	1	29	IgG3	0	FALSE	0	0.99	FALSE	1
737	587.262	29	IgG3		1	EEQYNSTFR	EEQYN[29.737]STFR	2	Y	2	1	29	IgG3	0	FALSE	0	0.99	FALSE	1
762	587.262	29	IgG3		1	EEQYNSTFR	EEQYN[29.762]STFR	2	Y	2	1	29	IgG3	0	FALSE	0	0.99	FALSE	1
787	587.262	29	IgG3		1	EEQYNSTFR	EEQYN[29.787]STFR	2	Y	2	1	29	IgG3	0	FALSE	0	0.99	FALSE	1
812	587.262	29	IgG3		1	EEQYNSTFR	EEQYN[29.812]STFR	2	Y	2	1	29	IgG3	0	FALSE	0	0.99	FALSE	1
837	587.262	29	IgG3		1	EEQYNSTFR	EEQYN[29.837]STFR	2	Y	2	1	29	IgG3	0	FALSE	0	0.99	FALSE	1
862	587.262	29	IgG3		1	EEQYNSTFR	EEQYN[29.862]STFR	2	Y	2	1	29	IgG3	0	FALSE	0	0.99	FALSE	1
887	587.262	29	IgG3		1	EEQYNSTFR	EEQYN[29.887]STFR	2	Y	2	1	29	IgG3	0	FALSE	0	0.99	FALSE	1
912	587.262	29	IgG3		1	EEQYNSTFR	EEQYN[29.912]STFR	2	Y	2	1	29	IgG3	0	FALSE	0	0.99	FALSE	1
937	587.262	29	IgG3		1	EEQYNSTFR	EEQYN[29.937]STFR	2	Y	2	1	29	IgG3	0	FALSE	0	0.99	FALSE	1
962	587.262	29	IgG3		1	EEQYNSTFR	EEQYN[29.962]STFR	2	Y	2	1	29	IgG3	0	FALSE	0	0.99	FALSE	1
987	587.262	29	IgG3		1	EEQYNSTFR	EEQYN[29.987]STFR	2	Y	2	1	29	IgG3	0	FALSE	0	0.99	FALSE	1
1012	587.262	29	IgG3		1	EEQYNSTFR	EEQYN[29.1012]STFR	2	Y	2	1	29	IgG3	0	FALSE	0	0.99	FALSE	1
1037	587.262	29	IgG3		1	EEQYNSTFR	EEQYN[29.1037]STFR	2	Y	2	1	29	IgG3	0	FALSE	0	0.99	FALSE	1
1062	587.262	29	IgG3		1	EEQYNSTFR	EEQYN[29.1062]STFR	2	Y	2	1	29	IgG3	0	FALSE	0	0.99	FALSE	1
1087	587.262	29	IgG3		1	EEQYNSTFR	EEQYN[29.1087]STFR	2	Y	2	1	29	IgG3	0	FALSE	0	0.99	FALSE	1
1112	587.262	29	IgG3		1	EEQYNSTFR	EEQYN[29.1112]STFR	2	Y	2	1	29	IgG3	0	FALSE	0	0.99	FALSE	1
1137	587.262	29	IgG3		1	EEQYNSTFR	EEQYN[29.1137]STFR	2	Y	2	1	29	IgG3	0	FALSE	0	0.99	FALSE	1
1162	587.262	29	IgG3		1	EEQYNSTFR	EEQYN[29.1162]STFR	2	Y	2	1	29	IgG3	0	FALSE	0	0.99	FALSE	1
1187	587.262	29	IgG3		1	EEQYNSTFR	EEQYN[29.1187]STFR	2	Y	2	1	29	IgG3	0	FALSE	0	0.99	FALSE	1
1212	587.262	29	IgG3		1	EEQYNSTFR	EEQYN[29.1212]STFR	2	Y	2	1	29	IgG3	0	FALSE	0	0.99	FALSE	1
1237	587.262	29	IgG3		1	EEQYNSTFR	EEQYN[29.1237]STFR	2	Y	2	1	29	IgG3	0	FALSE	0	0.99	FALSE	1
412.5	1173.52	30	IgG3		1	EEQYNSTFR	EEQYN[30.412]STFR	2	Y	1	1	30	IgG3	0	FALSE	0	0.99	FALSE	1
437	1173.52	30	IgG3		1	EEQYNSTFR	EEQYN[30.437]STFR	2	Y	1	1	30	IgG3	0	FALSE	0	0.99	FALSE	1
462	1173.52	30	IgG3		1	EEQYNSTFR	EEQYN[30.462]STFR	2	Y	1	1	30	IgG3	0	FALSE	0	0.99	FALSE	1
487	1173.52	30	IgG3		1	EEQYNSTFR	EEQYN[30.487]STFR	2	Y	1	1	30	IgG3	0	FALSE	0	0.99	FALSE	1
512	1173.52	30	IgG3		1	EEQYNSTFR	EEQYN[30.512]STFR	2	Y	1	1	30	IgG3	0	FALSE	0	0.99	FALSE	1
537	1173.52	30	IgG3		1	EEQYNSTFR	EEQYN[30.537]STFR	2	Y	1	1	30	IgG3	0	FALSE	0	0.99	FALSE	1
562	1173.52	30	IgG3		1	EEQYNSTFR	EEQYN[30.562]STFR	2	Y	1	1	30	IgG3	0	FALSE	0	0.99	FALSE	1
587	1173.52	30	IgG3		1	EEQYNSTFR	EEQYN[30.587]STFR	2	Y	1	1	30	IgG3	0	FALSE	0	0.99	FALSE	1
612	1173.52	30	IgG3		1	EEQYNSTFR	EEQYN[30.612]STFR	2	Y	1	1	30	IgG3	0	FALSE	0	0.99	FALSE	1
637	1173.52	30	IgG3		1	EEQYNSTFR	EEQYN[30.637]STFR	2	Y	1	1	30	IgG3	0	FALSE	0	0.99	FALSE	1
662	1173.52	30	IgG3		1	EEQYNSTFR	EEQYN[30.662]STFR	2	Y	1	1	30	IgG3	0	FALSE	0	0.99	FALSE	1
687	1173.52	30	IgG3		1	EEQYNSTFR	EEQYN[30.687]STFR	2	Y	1	1	30	IgG3	0	FALSE	0	0.99	FALSE	1
712	1173.52	30	IgG3		1	EEQYNSTFR	EEQYN[30.712]STFR	2	Y	1	1	30	IgG3	0	FALSE	0	0.99	FALSE	1
737	1173.52	30	IgG3		1	EEQYNSTFR	EEQYN[30.737]STFR	2	Y	1	1	30	IgG3	0	FALSE	0	0.99	FALSE	1
762	1173.52	30	IgG3		1	EEQYNSTFR	EEQYN[30.762]STFR	2	Y	1	1	30	IgG3	0	FALSE	0	0.99	FALSE	1
787	1173.52	30	IgG3		1	EEQYNSTFR	EEQYN[30.787]STFR	2	Y	1	1	30	IgG3	0	FALSE	0	0.99	FALSE	1
812	1173.52	30	IgG3		1	EEQYNSTFR	EEQYN[30.812]STFR	2	Y	1	1	30	IgG3	0	FALSE	0	0.99	FALSE	1
837	1173.52	30	IgG3		1	EEQYNSTFR	EEQYN[30.837]STFR	2	Y	1	1	30	IgG3	0	FALSE	0	0.99	FALSE	1
862	1173.52	30	IgG3		1	EEQYNSTFR	EEQYN[30.862]STFR	2	Y	1	1	30	IgG3	0	FALSE	0	0.99	FALSE	1
887	1173.52	30	IgG3		1	EEQYNSTFR	EEQYN[30.887]STFR	2	Y	1	1	30	IgG3	0	FALSE	0	0.99	FALSE	1
912	1173.52	30	IgG3		1	EEQYNSTFR	EEQYN[30.912]STFR	2	Y	1	1	30	IgG3	0	FALSE	0	0.99	FALSE	1
937	1173.52	30	IgG3		1	EEQYNSTFR	EEQYN[30.937]STFR	2	Y	1	1	30	IgG3	0	FALSE	0	0.99	FALSE	1
962	1173.52	30	IgG3		1	EEQYNSTFR	EEQYN[30.962]STFR	2	Y	1	1	30	IgG3	0	FALSE	0	0.99	FALSE	1
987	1173.52	30	IgG3		1	EEQYNSTFR	EEQYN[30.987]STFR	2	Y	1	1	30	IgG3	0	FALSE	0	0.99	FALSE	1
1012	1173.52	30	IgG3		1	EEQYNSTFR	EEQYN[30.1012]STFR	2	Y	1	1	30	IgG3	0	FALSE	0	0.99	FALSE	1
1037	1173.52	30	IgG3		1	EEQYNSTFR	EEQYN[30.1037]STFR	2	Y	1	1	30	IgG3	0	FALSE	0	0.99	FALSE	1
1062	1173.52	30	IgG3		1	EEQYNSTFR	EEQYN[30.1062]STFR	2	Y	1	1	30	IgG3	0	FALSE	0	0.99	FALSE	1
[truncated: 30,641 more rows]
