# Supplementary material for: DIALib: an automated ion library generator for data independent acquisition mass spectrometry analysis of peptides and glycopeptides
Source: bioRxiv preprint, doi:10.1101/696518, version 2 (2020-01-21)
Supplement: Supplementary Table S15 [file 696518_file15.xlsx]

## Sheet: Ions
Protein	Peptide	Precursor MZ	Precursor Charge	RT	Fragment MZ	Fragment Charge	Ion Type	Residue	20141205_002_BY4741_cw_2 (20141205_002_BY4741_cw_2.wiff (sample 1))	20141205_003_BY4741_cw_3 (20141205_003_BY4741_cw_3.wiff (sample 1))	20141205_004_BY4741_cw_4 (20141205_004_BY4741_cw_4.wiff (sample 1))	20141205_006_Dost3_cw_2 (20141205_006_Dost3_cw_2.wiff (sample 1))	20141205_007_Dost3_cw_3 (20141205_007_Dost3_cw_3.wiff (sample 1))	20141205_008_Dost3_cw_4 (20141205_008_Dost3_cw_4.wiff (sample 1))	20141205_010_Dost5_cw_2 (20141205_010_Dost5_cw_2.wiff (sample 1))	20141205_011_Dost5_cw_3 (20141205_011_Dost5_cw_3.wiff (sample 1))	20141205_012_Dost5_cw_4 (20141205_012_Dost5_cw_4.wiff (sample 1))	20141205_014_Dost6_cw_2 (20141205_014_Dost6_cw_2.wiff (sample 1))	20141205_015_Dost6_cw_3 (20141205_015_Dost6_cw_3.wiff (sample 1))	20141205_016_Dost6_cw_4 (20141205_016_Dost6_cw_4.wiff (sample 1))	20141205_038_Dalg6_cw_2 (20141205_038_Dalg6_cw_2.wiff (sample 1))	20141205_039_Dalg6_cw_3 (20141205_039_Dalg6_cw_3.wiff (sample 1))	20141205_040_Dalg6_cw_4 (20141205_040_Dalg6_cw_4.wiff (sample 1))	20141205_042_Dalg8_cw_2 (20141205_042_Dalg8_cw_2.wiff (sample 1))	20141205_043_Dalg8_cw_3 (20141205_043_Dalg8_cw_3.wiff (sample 1))	20141205_044_Dalg8_cw_4 (20141205_044_Dalg8_cw_4.wiff (sample 1))	20141205_026_Ddie2_cw_2 (20141205_026_Ddie2_cw_2.wiff (sample 1))	20141205_027_Ddie2_cw_3 (20141205_027_Ddie2_cw_3.wiff (sample 1))	20141205_028_Ddie2_cw_4 (20141205_028_Ddie2_cw_4.wiff (sample 1))	20141205_030_Dalg3_cw_2 (20141205_030_Dalg3_cw_2.wiff (sample 1))	20141205_031_Dalg3_cw_3 (20141205_031_Dalg3_cw_3.wiff (sample 1))	20141205_032_Dalg3_cw_4 (20141205_032_Dalg3_cw_4.wiff (sample 1))	20141205_046_Dalg9_cw_2 (20141205_046_Dalg9_cw_2.wiff (sample 1))	20141205_047_Dalg9_cw_3 (20141205_047_Dalg9_cw_3.wiff (sample 1))	20141205_048_Dalg9_cw_4 (20141205_048_Dalg9_cw_4.wiff (sample 1))	20141205_050_Dalg12_cw_2 (20141205_050_Dalg12_cw_2.wiff (sample 1))	20141205_051_Dalg12_cw_3 (20141205_051_Dalg12_cw_3.wiff (sample 1))	20141205_052_Dalg12_cw_3 (20141205_052_Dalg12_cw_3.wiff (sample 1))
GAS1-N40GS	FFYSNN[8.1237]GSQFYIR	1237	2	7.50753	127.039	1	b	1	3323.02	2960.73	6931.45	1239.58	4299.83		2898.24	2165.54	1471.49	742.743		3671.68		2808.83	140.391	1919.08	722.065	2287.35	3095.06	1348.69		1739.08	2477.22			256.649	2056.16	137.087		2851.69
GAS1-N40GS	FFYSNN[8.1237]GSQFYIR	1237	2	7.50753	138.055	2	b	1	2399.17	1427.56	1725.29	80.4228	813.87	641.855	879.952	1787.33	394.153	250.612	492.552	775.537	334.98	997.334			247.986	934.031	516.261	639.666		151.045	148.342	232.752			129.559	488.952	118.324
GAS1-N40GS	FFYSNN[8.1237]GSQFYIR	1237	2	7.50753	145.049	3	b	1	6980.71	4174.88	8942	244.284	4631.62		3520.61	4454.05	2417.96			5928.08		4110.82	385.032	2637.52	957.09	2578.6	2993.46	1850.57		1348.9	1677.54		837.803		1868.22			6515.68
GAS1-N40GS	FFYSNN[8.1237]GSQFYIR	1237	2	7.50753	163.06	4	b	1	6134.35	4835.29	10043.3	1388.64	6649.12	2269.99	4808.69	4896.02	2319.42			5322.66		4619.25		1334.56	2247.97	2597.53	2399.95	1838.63		1319.25	835.737		681.732		904.825		1163.79	5684.34
GAS1-N40GS	FFYSNN[8.1237]GSQFYIR	1237	2	7.50753	168.065	5	b	1	1837.89	795.771	1183.33	202.034	730.849	543.437	794.922	656.371	332.861	369.257	85.4608	1073.59		628.973		220.899	256.542	370.86	462.432	371.969	690.189			29.6598	33.397	33.4569	121.916			1259.31
GAS1-N40GS	FFYSNN[8.1237]GSQFYIR	1237	2	7.50753	186.076	6	b	1	571.938	547.561	709.076	434.808	372.399	97.4305	481.642	483.277	329.482	123.332	56.2091	686.284		628.933			287.905	450.097	115.428	149.577	64.5246			57.6078		66.9848		271.073	249.656	489.225
GAS1-N40GS	FFYSNN[8.1237]GSQFYIR	1237	2	7.50753	204.087	7	b	1	3706.23	1868.22	4384.29	250.628	1495.54	1370.02	2803.32	2071.24	1470.79		566.493		149.604	1686.38		917.044	1277.75	1085.33	822.772	909.952	1806.33	125.896		213.391	221.33	57.727	222.147	340.189	748.067	2405.79
GAS1-N40GS	FFYSNN[8.1237]GSQFYIR	1237	2	7.50753	366.139	8	b	1	1118.38	1066.32	2157.43	549.469	609.313	566.787	826.074	1320.46	525.951		236.821	736.701	92.6251	725.119	23.2543		349.311	481.408	193.537	295.885	294.707			162.148			98.4843	238.789	203.194
GAS1-N40GS	FFYSNN[25.1237]GSQFYIR	1237	2	24.4079	127.039	1	b	1		37.4476	70.4435		37.534	34.2088				20.3176	37.3694		58.1647		37.3897		23.5702	36.3505		65.8606								38.4216		58.9514
GAS1-N40GS	FFYSNN[25.1237]GSQFYIR	1237	2	24.4079	138.055	2	b	1		154.196	39.8566			138.674			36.397				37.5335	69.9524	35.9761														86.6232
GAS1-N40GS	FFYSNN[25.1237]GSQFYIR	1237	2	24.4079	145.049	3	b	1	30.5567		34.7415	29.7916			10.7319			37.5311			30.7376	36.7659		16.0576			35.1854								37.509		36.8721	59.5646
GAS1-N40GS	FFYSNN[25.1237]GSQFYIR	1237	2	24.4079	163.06	4	b	1		37.39			26.9242	182.82	37.5081					29.6372		61.0438			47.1404		43.2834	23.5684										60.7223
GAS1-N40GS	FFYSNN[25.1237]GSQFYIR	1237	2	24.4079	168.065	5	b	1	102.024				33.251				13.6943			108.338						36.7679		18.626								36.3491
GAS1-N40GS	FFYSNN[25.1237]GSQFYIR	1237	2	24.4079	186.076	6	b	1				38.1939				75.0668	14.0754				37.5333		37.3897		23.5702					35.154	37.534							78.8906
GAS1-N40GS	FFYSNN[25.1237]GSQFYIR	1237	2	24.4079	204.087	7	b	1		35.3017	16.0196	36.7683	99.1225			37.3547			36.3502		30.994				111.239				71.9285	37.5093	14.2755			75.2389			37.5095	89.0318
GAS1-N40GS	FFYSNN[25.1237]GSQFYIR	1237	2	24.4079	366.139	8	b	1	74.2743	10.7315		37.4644		67.9584	37.3884		9.60669	37.5311		146.215				10.4367	12.9601	75.0665			31.054					50.0261	112.546			191.785
GAS1-N40GS	FFYSNN[15.1237]GSQFYIR	1237	2	15.5953	127.039	1	b	1	1472.41	2215.75	2215.55	1987.02	3080.15	3485.8	284.145	697.219	329.441	1415.75	542.741	915.919	2661.8	3482.64	1431.09	973.432	2224.47	2055.19	901.437	404.845	1899.3				243.473	688.094			476.293
GAS1-N40GS	FFYSNN[15.1237]GSQFYIR	1237	2	15.5953	138.055	2	b	1	4132.21	3953.54	3603.21	2274.33	4858.32	3900.68	618.15	1421.58	163.631	995.357	1343.77	1516.65	4181.95	4127.09	1901.61	1566.58	4355.91	2896.23	2313.06	1700.12	2987.77				1275.12	1347.4			272.122
GAS1-N40GS	FFYSNN[15.1237]GSQFYIR	1237	2	15.5953	145.049	3	b	1	1934.63	4120.64	3334.07	3728.6	4441.52	7013.84	912.83	1390.32	1220.06	1797.54	1229.4	2087.57	6474.15	5001.58	1752.16	1795.21	6156.34	2545.92	2286.99	1261.47	3154.24				590.435	2002.87			1190.79
GAS1-N40GS	FFYSNN[15.1237]GSQFYIR	1237	2	15.5953	163.06	4	b	1	3222.71	8678.07	5525.39	6578.12	13462.3	12507.6	1054.61	927.73	698.274	4930.83	1511.56	2417.41	13397.8	10903.4	3836.12	2913.77	13674	8757.67	5506.08	2822.44	6946.34				1320.19	3755.87			3531.6
GAS1-N40GS	FFYSNN[15.1237]GSQFYIR	1237	2	15.5953	168.065	5	b	1	1329.73	1856.85	3081.33	1963.75	2076.61	3171.39		1255.03	709.845	1504.27	957.22	1428.64	3520.82	2163.68	811.736	661.332	2938.84	1288.56	1617.85	537.355	1242.27				427.907	1590.61			174.639
GAS1-N40GS	FFYSNN[15.1237]GSQFYIR	1237	2	15.5953	186.076	6	b	1	817.481	850.838	1705.46	1011.48	2306.15	2159.45	47.9854	314.183	312.411	1056.74	477.938	772.318	1514.55	2218.07	1067.25	1012.16	1743.05	1316.32	749.929		830.159					1097.46			467.471
GAS1-N40GS	FFYSNN[15.1237]GSQFYIR	1237	2	15.5953	204.087	7	b	1	4478.48	7110.87	6753.66	4674.51	9227.89	8330.32	1078.33	331.49	1803.06	4097.71	2611.93	4766.39	9742.61	6738.17	4650.99	2802.88	9388.55	7036.58	4041.78	2326.68	5248.34				787.681	4242.34			2607.6
GAS1-N40GS	FFYSNN[15.1237]GSQFYIR	1237	2	15.5953	366.139	8	b	1	683.256	3254.95	2657.28	2635.64	3802.59	4167.03	327.86	684.316	537.401	1013.81	786.326	1399.79	4989.59	3593.97	1634.2	439.568	1919.7	1755.14	845.04	252.793	1920.94				605.204	706.485			1845.74
GAS1-N40GS	FFYSNN[9.1237]GSQFYIR	1237	2	9.38118	127.039	1	b	1	88.3217	787.187			3700.16		612.524		709.193	1283.3	619.693			6889.66	4169.61			19.746					3048.82		1996.27	255.07	2123.87	189.122	2274.05	3463.1
GAS1-N40GS	FFYSNN[9.1237]GSQFYIR	1237	2	9.38118	138.055	2	b	1				86.3516	182.516	50.8754	245.731	142.991			59.3789		432.566			15.1031	18.311			43.0237		233.489						284.771	240.329
GAS1-N40GS	FFYSNN[9.1237]GSQFYIR	1237	2	9.38118	145.049	3	b	1	118.077	626.769			4887.76		1802.67	42.7725	1876.98	377.261	1066.35			8694.31	6392.66			142.907					5128.8		2648.3	130.287	3203.58		4162.66	7162.69
GAS1-N40GS	FFYSNN[9.1237]GSQFYIR	1237	2	9.38118	163.06	4	b	1	383.288	135.391			3976.19		1996.26	60.8278	1113.18	1306.33	606.783			8493.82	4945.88								4555.59		3113.2		3283.11	209.571	6179.28	7225.55
GAS1-N40GS	FFYSNN[9.1237]GSQFYIR	1237	2	9.38118	168.065	5	b	1	51.3463		129.706	101.802		216.653		130.095			69.5305		67.2412			51.1867	110.484	248.534	99.2846	45.0654	14.0297	27.3143		28.1409		35.176
GAS1-N40GS	FFYSNN[9.1237]GSQFYIR	1237	2	9.38118	186.076	6	b	1		128.226	19.2743	56.1939				75.6687		160.337				673.386	328.827	37.0991				109.538	74.7198		386.131	73.5195		43.0008	262.229	124.924		1663.17
GAS1-N40GS	FFYSNN[9.1237]GSQFYIR	1237	2	9.38118	204.087	7	b	1				380.196		458.704		121.532			214.976		268.988					131.808	196.03	63.7575	57.961	202.802				18.6797		169.247		4705.35
GAS1-N40GS	FFYSNN[9.1237]GSQFYIR	1237	2	9.38118	366.139	8	b	1						63.8684			65.7808	182.271	33.9978		106.793			52.5763	118.602			40.3689	176.233			91.2282	173.689			104.932
GAS1-N40GS	FFYSNN[1.1237]GSQFYIR	1237	2	0.304295	127.039	1	b	1							37.5053		17.8749	41.0202			93.743	13.7505	37.53					34.0386	13.9336	37.5398					37.5338	75.0682	36.8706
GAS1-N40GS	FFYSNN[1.1237]GSQFYIR	1237	2	0.304295	138.055	2	b	1	87.2679	26.4254	16.7944	17.7238	101.677	31.2479	107.035			37.3894	37.5344	34.7112	23.7624		37.5345			75.0692	26.5017		36.1887				33.8171
GAS1-N40GS	FFYSNN[1.1237]GSQFYIR	1237	2	0.304295	145.049	3	b	1	71.1834					31.5307	72.6859	15.8322					35.7257	74.8897	37.9394		144.048	37.5308		34.3716			20.4058
GAS1-N40GS	FFYSNN[1.1237]GSQFYIR	1237	2	0.304295	163.06	4	b	1	9.70292			47.4493					14.459		37.5351	35.8247		38.5957		21.3152	51.6333	23.1055				57.9667	112.601	73.2593	29.6045		37.5338		74.9436
GAS1-N40GS	FFYSNN[1.1237]GSQFYIR	1237	2	0.304295	168.065	5	b	1			27.8422		20.6194	74.7635		28.8687									37.5334			37.3898				35.8116
GAS1-N40GS	FFYSNN[1.1237]GSQFYIR	1237	2	0.304295	186.076	6	b	1		37.5333			37.5309				36.8721	36.7682											33.2174			36.3499
GAS1-N40GS	FFYSNN[1.1237]GSQFYIR	1237	2	0.304295	204.087	7	b	1	34.7798	19.4049			37.5309			37.5141	33.9051			41.6463	68.6612			37.4878			14.0755		148.875		31.7362		37.5329			72.1106	27.6425	37.1658
GAS1-N40GS	FFYSNN[1.1237]GSQFYIR	1237	2	0.304295	366.139	8	b	1	26.4944	37.5328		8.76167							4.89139								4.66905			29.2404		37.5333					37.4892	37.2715
GAS1-N40GS	FFYSNN[28.1237]GSQFYIR	1237	2		127.039	1	b	1							37.5326
GAS1-N40GS	FFYSNN[28.1237]GSQFYIR	1237	2		138.055	2	b	1							36.7667		37.4879					36.707				37.5307												40.5285
GAS1-N40GS	FFYSNN[28.1237]GSQFYIR	1237	2		145.049	3	b	1						31.6424							37.5336					37.391									23.577			37.5332
GAS1-N40GS	FFYSNN[28.1237]GSQFYIR	1237	2		163.06	4	b	1			37.5339				37.5326		37.5089				34.0481			37.5344
GAS1-N40GS	FFYSNN[28.1237]GSQFYIR	1237	2		168.065	5	b	1						37.5331								37.5334													23.577
GAS1-N40GS	FFYSNN[28.1237]GSQFYIR	1237	2		186.076	6	b	1												37.5352																		22.6889
GAS1-N40GS	FFYSNN[28.1237]GSQFYIR	1237	2		204.087	7	b	1			37.5332		75.0664																		37.5288							36.3493
GAS1-N40GS	FFYSNN[28.1237]GSQFYIR	1237	2		366.139	8	b	1					37.5331	34.048						37.5341				26.9233							37.3896
GAS1-N40GS	FFYSNN[24.1237]GSQFYIR	1237	2	23.9875	127.039	1	b	1				40.9682		35.408	37.5337			17.3536	39.3713		112.547	80.6037			116.023		37.5314		51.8003		112.407	75.4795		74.2338	107.236	36.3482	56.2317	283.003
GAS1-N40GS	FFYSNN[24.1237]GSQFYIR	1237	2	23.9875	138.055	2	b	1	45.7334			56.6223		390.144	13.5303	156.879		102.92		150.373	35.0793					56.6991		85.4576	4.16107	32.6019	71.7592	19.404	85.5526	107.751	117.502			1102.75
GAS1-N40GS	FFYSNN[24.1237]GSQFYIR	1237	2	23.9875	145.049	3	b	1			106.264		42.5297	43.7118	49.4092		33.3185	111.294	74.9031	31.529	103.939		39.8868		101.217			26.8677		106.883		74.5776	29.6745		36.2485	20.2735	7.94807	272.977
GAS1-N40GS	FFYSNN[24.1237]GSQFYIR	1237	2	23.9875	163.06	4	b	1		22.7726	55.0802	58.9418	21.6865	116.179	99.5416	77.4467	178.187		177.02	25.8639	132.563	187.904	93.5444	37.6641				35.814	98.0444	105.068	99.5777	244.063		51.0571	85.8941			331.336
GAS1-N40GS	FFYSNN[24.1237]GSQFYIR	1237	2	23.9875	168.065	5	b	1	66.7053			72.4112		71.317	94.4576	71.0825			22.2428	33.9991	117.895	23.5027		37.5324	31.1024	12.4611			37.5336	31.053		50.8312		78.116			74.2993
GAS1-N40GS	FFYSNN[24.1237]GSQFYIR	1237	2	23.9875	186.076	6	b	1			63.5436			116.649		82.714		61.1316			113.437		122.3		73.265	36.7498			37.5336		37.5317				75.5453			33.8897
GAS1-N40GS	FFYSNN[24.1237]GSQFYIR	1237	2	23.9875	204.087	7	b	1	68.5544	18.7491	158.049	13.8749	70.1664	51.4537		240.033	142.43	159.974	26.5027	42.6196	63.9628	83.7434	117.726	31.3491		310.951	36.7657				260.53	29.3963		68.5012	22.0708	97.1826		361.624
GAS1-N40GS	FFYSNN[24.1237]GSQFYIR	1237	2	23.9875	366.139	8	b	1		61.9851	34.8255	136.295	19.395	115.421		37.9095	91.3546	26.8547	57.5386		45.3232		34.5052		110.712	84.593	66.4385	37.5332	42.1012	76.1828	34.7169		108.118		43.5465	37.5335	98.7074	412.956
GAS1-N40GS	FFYSNN[27.1237]GSQFYIR	1237	2	27.0408	127.039	1	b	1							36.8704
GAS1-N40GS	FFYSNN[27.1237]GSQFYIR	1237	2	27.0408	138.055	2	b	1		37.5347					35.0955						37.3883	36.8711				37.5094
GAS1-N40GS	FFYSNN[27.1237]GSQFYIR	1237	2	27.0408	145.049	3	b	1			33.4774			31.0842						37.5402						37.5347									37.5448			18.6883
GAS1-N40GS	FFYSNN[27.1237]GSQFYIR	1237	2	27.0408	163.06	4	b	1		112.603	37.5312				36.8544													37.3995										56.6215
GAS1-N40GS	FFYSNN[27.1237]GSQFYIR	1237	2	27.0408	168.065	5	b	1		37.5347				35.1833								37.389													37.5448			64.3893
GAS1-N40GS	FFYSNN[27.1237]GSQFYIR	1237	2	27.0408	186.076	6	b	1	9.38522				37.3716							37.3753								35.1862								37.5305	31.502
GAS1-N40GS	FFYSNN[27.1237]GSQFYIR	1237	2	27.0408	204.087	7	b	1	32.4843				75.0668							37.5408	37.53	19.404									37.5076					37.3897	35.8568	38.8553
GAS1-N40GS	FFYSNN[27.1237]GSQFYIR	1237	2	27.0408	366.139	8	b	1						31.0525																	37.5339						37.5335
GAS1-N40GS	FFYSNN[17.1237]GSQFYIR	1237	2	17.8584	127.039	1	b	1					553.993	571.25			26.8927	130.822	137.422	40.0102	209.169	513.576	72.7485	96.8887	311.927	376.592	200.239	229.305	64.398					43.7605	50.2365	213.757
GAS1-N40GS	FFYSNN[17.1237]GSQFYIR	1237	2	17.8584	138.055	2	b	1		373.115	242.792		259.686	1124.73						260.469	176.262	691.776			555.253	247.065		328.662	119.817		32.8146		405.291	128.347	265.678
GAS1-N40GS	FFYSNN[17.1237]GSQFYIR	1237	2	17.8584	145.049	3	b	1	45.7417				427.313	1459.71			237.518	131.642	29.8766		426.061	832.266	401.546		472.243	354.626			175.864	312.467	637.442	43.6788	153.71	74.1874	258.049
GAS1-N40GS	FFYSNN[17.1237]GSQFYIR	1237	2	17.8584	163.06	4	b	1			1513.95		952.925	1729.22	279.016		704.865	369.495	309.161		349.547		327.941	215.828	640.511	696.204		276.84	145.108	271.759	277.92		483.751	666.935	397.142	308.687
GAS1-N40GS	FFYSNN[17.1237]GSQFYIR	1237	2	17.8584	168.065	5	b	1		282.177	643.274		417.149	558.738	40.6753			55.4734	438.201		397.229	729.771		135.11	759.964	300.34		186.318		336.168	39.8846	107.795		82.3417	152.039	57.6497
GAS1-N40GS	FFYSNN[17.1237]GSQFYIR	1237	2	17.8584	186.076	6	b	1	28.9787	63.9926	618.558	161.804	183.884	234.615		77.8166	286.946			72.7888	70.1453	180.688	113.359		288.19		31.5491			132.304	74.6519			313.884	156.402	92.9856
GAS1-N40GS	FFYSNN[17.1237]GSQFYIR	1237	2	17.8584	204.087	7	b	1		1113.59	1145.54	64.2033	945.443	2004.98		100.76		820.587	468.798	280.023	834.798	678.007	242.112	283.609	1303.12	649.534		89.874	88.6016	40.3443	144.706		338.82	808.101	266.538
GAS1-N40GS	FFYSNN[17.1237]GSQFYIR	1237	2	17.8584	366.139	8	b	1	100.243	246.737	429.81		313.244	933.933	381.811	260.587		39.3531		768.469	480.966				623.108	245.24			147.764	394.011	187.968			90.9804	104.211
GAS1-N40GS	FFYSNN[2.1237]GSQFYIR	1237	2	1.90459	127.039	1	b	1			37.534				75.2937			14.0753			57.5392	20.5038	36.4789					48.3116		37.2728	19.0674				36.7954
GAS1-N40GS	FFYSNN[2.1237]GSQFYIR	1237	2	1.90459	138.055	2	b	1	74.4249	20.8182		37.2689	97.9127	14.3385				14.0753			20.5537		35.1846		7.11812	66.5812			48.5032		63.3997					37.533		37.5307
GAS1-N40GS	FFYSNN[2.1237]GSQFYIR	1237	2	1.90459	145.049	3	b	1			37.5328			18.9671			37.3877		37.533	74.8965	67.7484		36.8719	35.9752			37.5093	37.533				37.51	51.8464				37.3887
GAS1-N40GS	FFYSNN[2.1237]GSQFYIR	1237	2	1.90459	163.06	4	b	1	37.5345			58.4548			37.5335	33.5134	31.7744		37.3542		4.47325				37.3712	17.505	112.389	26.8924		64.1784	106.607				75.0682		36.8714
GAS1-N40GS	FFYSNN[2.1237]GSQFYIR	1237	2	1.90459	168.065	5	b	1					20.6263				37.3877					37.5095		10.9942		74.2752			32.2724						37.4887		112.545
GAS1-N40GS	FFYSNN[2.1237]GSQFYIR	1237	2	1.90459	186.076	6	b	1		37.3868	37.5325		37.3626			34.1995	36.8701	31.0531		37.3886												37.3277
GAS1-N40GS	FFYSNN[2.1237]GSQFYIR	1237	2	1.90459	204.087	7	b	1		19.0689	37.534	31.0284	33.4774							37.529				31.0527				114.194			36.8012		37.5335			19.6796	69.4453	33.3164
GAS1-N40GS	FFYSNN[2.1237]GSQFYIR	1237	2	1.90459	366.139	8	b	1	75.0608	36.8694	150.121			37.37							36.8708	23.3879								36.841			37.5334
GAS1-N40GS	FFYSNN[7.1237]GSQFYIR	1237	2	7.50204	127.039	1	b	1	4199.59	3441.73	10562.5	1063.65	4954.05		2382.3	2413.6	1967.87	1477.41	3285.64	3634.1	3928.45	2599.27	106.098	1995.19	816.026	2823.27	3303.53	1828.68	2620.47	2197.75	3177.04				1700.12	2779.25	2459.2	3353.28
GAS1-N40GS	FFYSNN[7.1237]GSQFYIR	1237	2	7.50204	138.055	2	b	1	1593.72	1307.47	1559.6	137.873			656.474	1588.2	360.585		904.55	327.641	941.903	1060.65	106.613	283.526	118.053	899.635	741.73	468.814	527.003	257.22	250.567	107.453	33.5293	34.3981	415.288	247.195	259.759
GAS1-N40GS	FFYSNN[7.1237]GSQFYIR	1237	2	7.50204	145.049	3	b	1	5360.35	3816.43	13396.7		6873.39		3578.9	4466.16	3188.55	2985.53	2709.1	5322.46	5081	5057.81	122.324	3748.35	1469.15	2708.13	2949.15	1949.97	4676.73	1789.06	2138.97		961.941		2921.39	1500.06	2922.5	5087.89
GAS1-N40GS	FFYSNN[7.1237]GSQFYIR	1237	2	7.50204	163.06	4	b	1	5697.33	3929.24	12882.5	1320.91	7008.37		4301.4	4738.35	3245.44	3125.08	3096.83	4612.64	3616.97	4253.92	388.122	1703.23	2546.65	2810.09	2808.87	2017.16	3212.33	1851.81	2196.57		1237.06		1561.75	1906.59	2186.61	4803.19
GAS1-N40GS	FFYSNN[7.1237]GSQFYIR	1237	2	7.50204	168.065	5	b	1	1801.89	676.403	868.013	189.498	550.326	411.209	557.466	588.999	171.921		448.305	561.661	865.983	380.393		225.142	289.514	395.413	360.475	415.85	547.733						179.356
GAS1-N40GS	FFYSNN[7.1237]GSQFYIR	1237	2	7.50204	186.076	6	b	1	698.517	466.617	818.784	348.369	401.915		429.88	455.569	225.259		364.274	254.295	280.311	458.243			406.861	375.024		93.8264				70.3651
GAS1-N40GS	FFYSNN[7.1237]GSQFYIR	1237	2	7.50204	204.087	7	b	1	3088.09	1437.26	3857.2	212.942	1541.64	1399.73	2013.39	1129.62	1136.24		1313.06	685.807	1415.96	1553.05	532.642	792.22	1331.2	1047.67	665.016	449.664		257.883	797.875	87.5687	234.12		255.563	176.986		621.824
GAS1-N40GS	FFYSNN[7.1237]GSQFYIR	1237	2	7.50204	366.139	8	b	1	1326.55	733.16	1087.37	203.29			492.806	695.335	87.1683		589.955	617.762	418.871	751.112	74.0995	257.626	324.362	391.648	214.047				93.6569	154.665		37.2891			160.587
GAS1-N40GS	FFYSNN[20.1237]GSQFYIR	1237	2	19.443	127.039	1	b	1	135.706	71.8926	71.6007	127.91	226.677	323.156	26.2565	13.4263		37.2471		63.2862	131.299		100.041		32.719	115.876		7.8747	20.8361	39.8927				31.8098		31.0539	17.0729	344.1
GAS1-N40GS	FFYSNN[20.1237]GSQFYIR	1237	2	19.443	138.055	2	b	1		117.387	176.226		84.0452	431.914	132.962	75.3406	28.3045	24.1666	119.817	82.9672	36.5291			62.871	53.0851	70.3857	77.1261	74.3522					28.0919	63.1627			75.8404
GAS1-N40GS	FFYSNN[20.1237]GSQFYIR	1237	2	19.443	145.049	3	b	1		56.6647	22.2848	62.2172		66.4921	17.28	117.714	87.6092	73.1034	62.5109	88.1745	29.968	56.8476	191.262		63.012	120.495	128.565					102.256				64.8209		168.428
GAS1-N40GS	FFYSNN[20.1237]GSQFYIR	1237	2	19.443	163.06	4	b	1	49.8473	85.1984	58.0508				55.7029	164.902		66.0526		80.9765	133.103			90.4857	77.5115	149.147		131.006			25.4434	46.6035	28.3607	127.104	87.4059	42.3812	33.589
GAS1-N40GS	FFYSNN[20.1237]GSQFYIR	1237	2	19.443	168.065	5	b	1	55.6897		73.6735		86.3956	102.4	67.6089			188.181	96.0356	107.05		22.2456	32.3188			38.7367	142.074	65.9321	12.9249	16.1942	37.5312	34.5929				19.2745
GAS1-N40GS	FFYSNN[20.1237]GSQFYIR	1237	2	19.443	186.076	6	b	1		409.352		67.9593	43.2693			38.1567	122.831	173.949	123.866	78.5085	14.5302	24.7711	69.778	21.4304		68.7901			89.1743			34.2234	108.869	103.428	32.7031		52.374
GAS1-N40GS	FFYSNN[20.1237]GSQFYIR	1237	2	19.443	204.087	7	b	1	64.0269	110.272	208.124			112.548	28.2635	14.4315		307.963	75.9202	113.672	24.9081	199.177		196.962	12.5232			34.1688	30.2536	77.6155		76.6536	25.4754	35.3736			106.853
GAS1-N40GS	FFYSNN[20.1237]GSQFYIR	1237	2	19.443	366.139	8	b	1	499.188		7.2414		71.9222	209.873	377.398	88.3233	138.593	203.025	219.858	304.714	23.4059	142.672	20.8732	36.7589		47.5066	9.15217	173.655	232.538		68.56		105.194	66.0774	39.5046		80.6973
GAS1-N40GS	FFYSNN[14.1237]GSQFYIR	1237	2	14.3493	127.039	1	b	1	665.501	1903.65	3615.32	1860.07	7033.78	9475.58	1760.77	647.336	3930.64	2770.23	428.759	3401.09	3871.55	5621.4	1213.91	705.947	1847.76	1746.29	2849.1	405.834	1430.33	4059.94	1908.32	4118.99	149.114	398.397	2514.31	5106.38	5444.77	6498.67
GAS1-N40GS	FFYSNN[14.1237]GSQFYIR	1237	2	14.3493	138.055	2	b	1	1074.19	3137.43	4570.58	1817.74	9048.18	14424.9	2417.75	1634.9	5585.64	3561.69	725.062	3554.87	4819.99	6821.29	1858.8	1266.54	4240.11	2573.24	2488.87	1463.5	2498.25	13771.3	2494.1	10944.5	1427.44	1063.12	3927.3	8154.58	7434.52	20168.5
GAS1-N40GS	FFYSNN[14.1237]GSQFYIR	1237	2	14.3493	145.049	3	b	1	2025.1	3349.08	4239.54	3259.76	10765.8	14655.9	2061.12	2912.27	6586.82	3726.95	868.888	3688.48	5937.25	6938.84	1937.57	1728.96	5215.29	2453.9	2515.53	1409.49	2386.33	8370.75	2971.44	7140.26	498.975	1719.04	3445.32	7318.1	7502.32	9574.53
GAS1-N40GS	FFYSNN[14.1237]GSQFYIR	1237	2	14.3493	163.06	4	b	1	4718.92	8392.29	6070.26	5908.82	15842.7	21756.9	5246.5	4702.01	8170.01	4929.2	1888.62	8769.7	8360.26	8743.95	3532.04	2793.74	13068.4	7293.07	3854.55	1559.62	5892.56	14642	3242.63	9046.14	1444.17	2343.45	5681.09	10913.6	11004.9	12442.7
GAS1-N40GS	FFYSNN[14.1237]GSQFYIR	1237	2	14.3493	168.065	5	b	1	1016.96	2232.25	2860.53	1630.94	6898.53	7733.87	2109.4	1061.68	3568.98	2641.47	940.15	2775.71	3687.13	5304.76	1120.88	542.491	1832.21	1398.36	1639.6	693.186	1557.79	10750	1573.28	7277.95	426.196	652.265	2704.77	4008.2	3417.24	11489.2
GAS1-N40GS	FFYSNN[14.1237]GSQFYIR	1237	2	14.3493	186.076	6	b	1	482.43	756.099	1789.68	1056.7	3073.89	3893.9	608.969	306.303	2672.26	1136.06	717.494	1356.83	1855.21	1830.56	790.896	619.325	1614.77	1540.07	1007.66		967.541	3969.43	893.347	3394.04		855.144	1186.79	2953.06	2264.91	5617.44
GAS1-N40GS	FFYSNN[14.1237]GSQFYIR	1237	2	14.3493	204.087	7	b	1	3755.09	6157.38	6053.61	4266.87	17740	24392.2	3033.97	4962.16	8176.97	5747.58	1325.29	4660.16	7908.87	11516.6	3223.49	2420.03	7939.24	5601.31	5279.73	1568.56	3262.42	21298.8	8376.57	16144	588.098	3517.11	6963.37	11807.1	11029.1	22435.4
GAS1-N40GS	FFYSNN[14.1237]GSQFYIR	1237	2	14.3493	366.139	8	b	1	1135.06	2939.87	1513.23	2002.17	7436.91	11255.2	1409.49	867.391	3274.07	1830.19	776.081	2387.91	3373.57	4758.21	1704.13	462.312	1674.5	1585.36	2275.92	242.464	1854.43	7773.68	2297.97	6264.66	344.722	914.431	2911.26	3533.57	4422.37	9965.09
GAS1-N40GS	FFYSNN[26.1237]GSQFYIR	1237	2	25.662	127.039	1	b	1										19.9636			36.8364			37.5352		23.569
GAS1-N40GS	FFYSNN[26.1237]GSQFYIR	1237	2	25.662	138.055	2	b	1						36.8709							23.5689	69.995
GAS1-N40GS	FFYSNN[26.1237]GSQFYIR	1237	2	25.662	145.049	3	b	1	70.7894	23.569	33.1862				37.5332	10.4648	54.3983	37.5099			13.1351	37.5092	37.5341	37.5346											37.3892			18.6165
GAS1-N40GS	FFYSNN[26.1237]GSQFYIR	1237	2	25.662	163.06	4	b	1					75.0628		26.2697							56.2735						37.5441										45.0086
GAS1-N40GS	FFYSNN[26.1237]GSQFYIR	1237	2	25.662	168.065	5	b	1	37.0069							35.1844						14.3339				31.0528												64.3893
GAS1-N40GS	FFYSNN[26.1237]GSQFYIR	1237	2	25.662	186.076	6	b	1			23.1171						37.5335				5.82517		37.5347					37.5364		37.5088						37.5305	19.7812
GAS1-N40GS	FFYSNN[26.1237]GSQFYIR	1237	2	25.662	204.087	7	b	1		14.0765				35.9618							12.0081		75.0683							37.5305						37.5343	34.5423	22.8803
GAS1-N40GS	FFYSNN[26.1237]GSQFYIR	1237	2	25.662	366.139	8	b	1					43.4703	31.0525				37.5099								66.913									112.431		31.0528
GAS1-N40GS	FFYSNN[23.1237]GSQFYIR	1237	2	23.4809	127.039	1	b	1	220.489			143.65	30.8373				112.235		110.504	35.6995		40.0104		65.7667	8.96467			15.4482	49.5759			34.7785		24.2213	88.4674	38.3348	57.7427	188.415
GAS1-N40GS	FFYSNN[23.1237]GSQFYIR	1237	2	23.4809	138.055	2	b	1	27.8373	18.9275	218.104	11.0235	297.548			174.984	89.5419	5.82399	36.1891		83.3796	18.4651		108.959		37.924	23.5197	110.804		18.4474	34.2938		34.531		79.3642	176.773		130.359
GAS1-N40GS	FFYSNN[23.1237]GSQFYIR	1237	2	23.4809	145.049	3	b	1			73.6609	118.259	42.017	279.69			33.5691		44.408	13.1949	42.9736	48.3519	40.9959		20.1184	104.564		24.3931		96.1697	37.2991	148.269		16.1009	31.6994		28.6232	93.1757
GAS1-N40GS	FFYSNN[23.1237]GSQFYIR	1237	2	23.4809	163.06	4	b	1	49.4228			40.8602	61.3661	390.241	75.4953	127.834	94.778		13.2311		61.9861	16.2002	52.4893		183.112	114.677		20.4531	72.7682	111.286		89.3198	37.5079		75.2938	34.746		204.024
GAS1-N40GS	FFYSNN[23.1237]GSQFYIR	1237	2	23.4809	168.065	5	b	1	34.3428	37.5422	44.6311	35.6102	34.0477		30.9954	75.0628		31.0527	10.7698						32.6432	73.9344	65.1065		35.1838	37.5337			24.5204			29.9554	66.3258
GAS1-N40GS	FFYSNN[23.1237]GSQFYIR	1237	2	23.4809	186.076	6	b	1	50.6418	39.3079				132.785	23.5698	87.7702	24.1086	29.0659		75.7098	67.9762	142.897	121.785	37.1796					23.5684					14.0774	74.2743
GAS1-N40GS	FFYSNN[23.1237]GSQFYIR	1237	2	23.4809	204.087	7	b	1	148.601	105.617		285.255	77.3202	302.618		273.182	116.493			23.2416	113.461	164.997	119.087	19.4408	40.3637							38.6625		21.4581				356.284
GAS1-N40GS	FFYSNN[23.1237]GSQFYIR	1237	2	23.4809	366.139	8	b	1		50.8044	151.27			93.6777	29.0666	24.4995	198.908	80.8607		217.588	161.141		36.288	104.178			29.4621	31.0523	49.4015	74.0014	32.7384	55.2411	34.4998	59.0514	88.7184	37.2364	58.7925	415.788
GAS1-N40GS	FFYSNN[29.1237]GSQFYIR	1237	2		127.039	1	b	1
GAS1-N40GS	FFYSNN[29.1237]GSQFYIR	1237	2		138.055	2	b	1									37.5077																					21.6832
GAS1-N40GS	FFYSNN[29.1237]GSQFYIR	1237	2		145.049	3	b	1
GAS1-N40GS	FFYSNN[29.1237]GSQFYIR	1237	2		163.06	4	b	1									37.5077							36.8723														25.7457
GAS1-N40GS	FFYSNN[29.1237]GSQFYIR	1237	2		168.065	5	b	1
GAS1-N40GS	FFYSNN[29.1237]GSQFYIR	1237	2		186.076	6	b	1
GAS1-N40GS	FFYSNN[29.1237]GSQFYIR	1237	2		204.087	7	b	1					56.4282
GAS1-N40GS	FFYSNN[29.1237]GSQFYIR	1237	2		366.139	8	b	1					35.1832											26.9233														26.4878
GAS1-N40GS	FFYSNN[4.1237]GSQFYIR	1237	2	4.09406	127.039	1	b	1	37.7279			37.4891	19.5289	55.3224	29.665							36.3518									37.5336		27.1927	39.2564	36.7668			37.4889
GAS1-N40GS	FFYSNN[4.1237]GSQFYIR	1237	2	4.09406	138.055	2	b	1	150.139	42.7201				27.6027		37.5327	36.8544						40.9946	39.2528		37.4876		30.6979			64.5631
GAS1-N40GS	FFYSNN[4.1237]GSQFYIR	1237	2	4.09406	145.049	3	b	1				69.9607			34.6051			37.5343		33.4625					16.3251					22.2793	37.5328		51.8453			37.5344	29.6739	37.5339
GAS1-N40GS	FFYSNN[4.1237]GSQFYIR	1237	2	4.09406	163.06	4	b	1	27.9882	34.5421		33.127		113.503	37.1897	100.903		37.5344	36.5463		37.5331	20.653	38.9357			29.2849	76.7252					32.3968				37.5343	6.43204
GAS1-N40GS	FFYSNN[4.1237]GSQFYIR	1237	2	4.09406	168.065	5	b	1	37.531		32.0512									37.5327	36.7673	65.5477		37.5319	75.068			35.1842		24.1516		36.3497		32.9368			37.5326
GAS1-N40GS	FFYSNN[4.1237]GSQFYIR	1237	2	4.09406	186.076	6	b	1		31.0414	37.5354			14.0936	75.0686											67.5377		5.8245			37.5343
GAS1-N40GS	FFYSNN[4.1237]GSQFYIR	1237	2	4.09406	204.087	7	b	1	48.6058		150.357				36.8692		12.9302	37.2865	31.3173		37.5172				34.0387		36.9712	80.1213							75.0654
GAS1-N40GS	FFYSNN[4.1237]GSQFYIR	1237	2	4.09406	366.139	8	b	1					35.1827	37.1662		36.767											22.4663
GAS1-N40GS	FFYSNN[19.1237]GSQFYIR	1237	2	19.4549	127.039	1	b	1	138.776	6.23707	112.459			75.1231	46.843	25.6987					38.5576	42.2041	10.8327		6.76642		4.20575		67.5122	131.644	111.698	86.6576	51.2938		13.4194	3.47758	22.7905	393.147
GAS1-N40GS	FFYSNN[19.1237]GSQFYIR	1237	2	19.4549	138.055	2	b	1		54.3004	110.64	100.897	126.757		154.562	152.917			196.246	67.5868	75.203	96.2367	62.5675	47.6468		230.601	66.3227			152.258	182.255	54.07	81.2201		162.575	35.3982	27.0924
GAS1-N40GS	FFYSNN[19.1237]GSQFYIR	1237	2	19.4549	145.049	3	b	1		9.33468	20.3132	306.595		46.2229	60.6536		35.926	64.2836	53.1577	50.3766	199.966	13.4748		49.4143		92.5324		107.084					77.7046					87.4897
GAS1-N40GS	FFYSNN[19.1237]GSQFYIR	1237	2	19.4549	163.06	4	b	1	47.6262	23.6083				60.8388		66.1864	97.9253				51.0563	120.631	35.9489	33.58			32.1614	174.721		121.105	132.512		35.866	206.271	170.617	135.23	32.2696	164.337
GAS1-N40GS	FFYSNN[19.1237]GSQFYIR	1237	2	19.4549	168.065	5	b	1	124.353				77.6458		11.5571	77.2595	42.7413	290.305	25.2427	70.7052			24.4642		108.719	94.4333	49.1585	99.133	59.2369		169.484			24.9456	57.5214	24.1885
GAS1-N40GS	FFYSNN[19.1237]GSQFYIR	1237	2	19.4549	186.076	6	b	1	128.284	12.1406	199.848				75.1449			31.3568	106.062	26.027				100.285	111.473	59.3403				74.5833	93.6635	171.786	19.2268			36.8723
GAS1-N40GS	FFYSNN[19.1237]GSQFYIR	1237	2	19.4549	204.087	7	b	1	83.2623	189.141	136.607	51.3051	61.2097	243.155		115.33	163.457	46.2798	60.227	91.1087	58.9855	105.656	157.207		52.4138	98.4314			117.903	143.356		115.222	90.8026	307.701	215.927	105.089	137.355
GAS1-N40GS	FFYSNN[19.1237]GSQFYIR	1237	2	19.4549	366.139	8	b	1	367.064	346.944	135.685		41.8726		49.5067			231.629	194.379		215.18			112.063	53.5135	185.859	14.3154	79.2436		87.7811		243.329	9.90489	231.245		61.978	60.7317
GAS1-N40GS	FFYSNN[3.1237]GSQFYIR	1237	2	3.01355	127.039	1	b	1		37.3882		30.3007	37.5336	112.598					47.5663			13.4222	36.7588		37.533		35.1843	31.0522			35.8118				29.6736			35.7697
GAS1-N40GS	FFYSNN[3.1237]GSQFYIR	1237	2	3.01355	138.055	2	b	1				74.1469		9.41106				37.532		37.5332	29.6738					74.3921	35.1014				37.2034					35.1831
GAS1-N40GS	FFYSNN[3.1237]GSQFYIR	1237	2	3.01355	145.049	3	b	1	29.235			10.4785		37.4845	143.362	37.212	37.5324						42.7912	36.2278	11.7936					33.0897							29.6746
GAS1-N40GS	FFYSNN[3.1237]GSQFYIR	1237	2	3.01355	163.06	4	b	1		28.2278	37.3776		37.5336	71.4608		73.5452	31.8413					88.8302	46.5051		73.4821	17.2194		19.2528			71.3666	40.9966					37.4412	16.076
GAS1-N40GS	FFYSNN[3.1237]GSQFYIR	1237	2	3.01355	168.065	5	b	1	37.533	37.5056	31.1037			37.5323			37.5323	37.5321	37.5338		37.5267					74.8916			24.3951	53.9935		10.5962					112.595
GAS1-N40GS	FFYSNN[3.1237]GSQFYIR	1237	2	3.01355	186.076	6	b	1		37.5067					37.5315		37.5324	37.5326	37.5341		30.1771														37.5321
GAS1-N40GS	FFYSNN[3.1237]GSQFYIR	1237	2	3.01355	204.087	7	b	1				29.007				37.5328				96.649		28.6909		37.5335	37.5329			11.135								33.3021	75.063
GAS1-N40GS	FFYSNN[3.1237]GSQFYIR	1237	2	3.01355	366.139	8	b	1	37.5268	36.8715	36.7684	37.5341		36.7669								26.9249					31.0529		37.5305
GAS1-N40GS	FFYSNN[12.1237]GSQFYIR	1237	2	12.2674	127.039	1	b	1	7286.94	13240.1	13424.7	5701.42		11155.3	6486.07	7776.44	7141.33	2979.82	2209.52	11461.3		10857.4	2338.24	1817.12	13102.3	1709.09		4951.76	9346.89	2052.79	1733.19	608.149	692.455	1791.36	3291.75		2466.87	4581.65
GAS1-N40GS	FFYSNN[12.1237]GSQFYIR	1237	2	12.2674	138.055	2	b	1	8981.49	18251	20669	9507.29	3077.93	22823.3	10921.1	12116	9050.88	5491.26	5830.26	13040.1	2398.17	14186.5	3489.76	4123.15	20897.6		1554.77	5493.51	15755.7	2664.39	3182.42	1389.11	1388.27	4873.38	3337.8	371.897	3783.44	2697.64
GAS1-N40GS	FFYSNN[12.1237]GSQFYIR	1237	2	12.2674	145.049	3	b	1	12497.6	24315.5	29891	9723.92		21448.7	10587.9	14313.4	13854.9	4673.55	3609.22	14951.9	2059.08	15733.2	2609.44	3576.22	14680.9		668.018	5870.84	18754.7	3593.14	2551.91	2580.32	2243.21	4152.49	2412.86	154.769	5282.2	7193.51
GAS1-N40GS	FFYSNN[12.1237]GSQFYIR	1237	2	12.2674	163.06	4	b	1	22423.8	46680.2	54509.6	14861.9		31407.4	20669.6	32742.7	20068.6	11902.3	5604.51	29939.8		26923.7	7595.07	4893.18	40870.5		1585.58	9180.78	36590.9	4715.19	4948.17	2969.24	2644.53	7353.4	2092.24	742.194	8258.37	8572.23
GAS1-N40GS	FFYSNN[12.1237]GSQFYIR	1237	2	12.2674	168.065	5	b	1	5921.88	11284	13157	4843.77	2171.82	14145.8	5989	10783.1	6160.85	4368.19	1336.58	9824.64	2144.35	8219.25	1665.78	1753.59	13811.6		629.353	2902.01	10067.1	1631.37	356.454	355.63	868.978	3211.18	750.224	359.514	2283.57	1118.12
GAS1-N40GS	FFYSNN[12.1237]GSQFYIR	1237	2	12.2674	186.076	6	b	1	3055.71	6946.32	7852.3	3522.76		7164.34	3593.89	6096.91	2220.96	1661.61	604.023	4970.11	755.904	4699.29	2008.64	1202.59	8070.89	592.624		1955.98	6158.72	1056.31	934.59	369.905	893.453	1688.19	1057.97	226.841	1347.9	1083.95
GAS1-N40GS	FFYSNN[12.1237]GSQFYIR	1237	2	12.2674	204.087	7	b	1	15055.7	27971.1	40005.6	15654.6	5664.09	35649	13716.3	22766.8	14875.1	7956.83	5674.27	21319.7	8037.48	27248.6	9428.62	8572.81	38848.5		4499.23	13568.4	32222.5	4527.06	2466.58	2280.6	3251.66	8375.23	2736.63	914.419	7148.22	5735.65
GAS1-N40GS	FFYSNN[12.1237]GSQFYIR	1237	2	12.2674	366.139	8	b	1	5882.52	9270.15	11050.9	6610.29		12656	3804.57	8303.29	7915.41	2625.77	1892.47	5712.19	5121.5	8912.23	4044.38	3166.09	8801.19	1823.03	2491.87	3101.86	10125	1482.29	1439.07	471.765	941.821	2097.34		1418.36	1763.75
GAS1-N40GS	FFYSNN[30.1237]GSQFYIR	1237	2		127.039	1	b	1
GAS1-N40GS	FFYSNN[30.1237]GSQFYIR	1237	2		138.055	2	b	1
GAS1-N40GS	FFYSNN[30.1237]GSQFYIR	1237	2		145.049	3	b	1
GAS1-N40GS	FFYSNN[30.1237]GSQFYIR	1237	2		163.06	4	b	1
GAS1-N40GS	FFYSNN[30.1237]GSQFYIR	1237	2		168.065	5	b	1
GAS1-N40GS	FFYSNN[30.1237]GSQFYIR	1237	2		186.076	6	b	1
GAS1-N40GS	FFYSNN[30.1237]GSQFYIR	1237	2		204.087	7	b	1
GAS1-N40GS	FFYSNN[30.1237]GSQFYIR	1237	2		366.139	8	b	1
GAS1-N40GS	FFYSNN[6.1237]GSQFYIR	1237	2	5.52687	127.039	1	b	1	114.139			75.8817	67.2556	27.577		39.8728	100.744			75.0691		31.4459	6.10736			102.75	79.3372		46.0063			57.8893			23.288	37.5301
GAS1-N40GS	FFYSNN[6.1237]GSQFYIR	1237	2	5.52687	138.055	2	b	1		75.0654					29.508				16.5572			8.69114							72.023					23.5672			37.3895
GAS1-N40GS	FFYSNN[6.1237]GSQFYIR	1237	2	5.52687	145.049	3	b	1			4.66503	22.7885	20.3056	169.288	37.5339	25.4259	43.3235		99.5188			38.8473	9.1473		73.2205	74.3448	295.638	47.1341	112.545	124.876	20.4529	37.3265	112.6			117.448		36.8667
GAS1-N40GS	FFYSNN[6.1237]GSQFYIR	1237	2	5.52687	163.06	4	b	1	150.077			19.0513	90.1665	74.1902		105.52	184.954	187.684	47.8999	105.043	25.6249	182.77		36.435	35.9906	186.546	134.408	148.258	48.8576	112.584	75.0616	121.011	37.5045		43.9719	135.455	18.9953
GAS1-N40GS	FFYSNN[6.1237]GSQFYIR	1237	2	5.52687	168.065	5	b	1		35.8074	11.6522									37.5351	26.5022						37.3894					33.8149						37.032
GAS1-N40GS	FFYSNN[6.1237]GSQFYIR	1237	2	5.52687	186.076	6	b	1									37.5092							37.5094					37.5297	103.757
GAS1-N40GS	FFYSNN[6.1237]GSQFYIR	1237	2	5.52687	204.087	7	b	1	25.1078	26.3529	119.048		53.9002	62.3621		37.534		20.9253		29.6763	15.1848	74.2315		62.7916	37.5331		18.8946	74.1393		21.7117	56.6283				11.6512
GAS1-N40GS	FFYSNN[6.1237]GSQFYIR	1237	2	5.52687	366.139	8	b	1							37.5329			37.534			36.8716		23.5694											35.1837
GAS1-N40GS	FFYSNN[10.1237]GSQFYIR	1237	2		127.039	1	b	1		237.787			170.332	503.612	923.1	1833.15	267.618				8572.6	7300.63	4436.91	5215.94		3788.92	2530.67	325.546	219.925	3535	882.857	2455.74	805.317	291.902	306.207	980.267	674.656
GAS1-N40GS	FFYSNN[10.1237]GSQFYIR	1237	2		138.055	2	b	1				554.051	940.492	571.234	183.313				59.4334						887.666			139.317	58.2023		732.508		326.452	719.125	438.549	1372.38	779.517
GAS1-N40GS	FFYSNN[10.1237]GSQFYIR	1237	2		145.049	3	b	1		1037.76		1002.63	1021.01		1628.31	1759.82	2016.09				11936.4	10714.1	6766.41	8507.18		6626.62	3049.73			4277.24		4752.38	340.887		468.728	817.153	1000.4
GAS1-N40GS	FFYSNN[10.1237]GSQFYIR	1237	2		163.06	4	b	1				1210.38	1980.21	890.981	1146.92	1204.54	1050.18				13458.4	12008.5	6820.55	6972	3662.24	6394.98	3088			4586.24	2855.61	3926.86		399.86	1016.27	2023.83	1304.75
GAS1-N40GS	FFYSNN[10.1237]GSQFYIR	1237	2		168.065	5	b	1		199.463		591.246	1046.87	916.757					94.3758						1584.4			298.316	349.641		1099.98				353.42	1259.61	814.236
GAS1-N40GS	FFYSNN[10.1237]GSQFYIR	1237	2		186.076	6	b	1				222.328	285.92	153.966					7.83275		689.936		530.826		301.045			78.6542	71.4734		406.688	263.324	210.718		229.642	543.303	301.088
GAS1-N40GS	FFYSNN[10.1237]GSQFYIR	1237	2		204.087	7	b	1		229.813		2400.53	2928.78	601.304					231.149						2659.29			2107.65			1718.73		536.184	1238.16	1375.88	3066.83	1813.18
GAS1-N40GS	FFYSNN[10.1237]GSQFYIR	1237	2		366.139	8	b	1		116.645		233.162	843.031												760.506			497.779	210.216				167.923	254.637	138.573	489.754	857.191
GAS1-N40GS	FFYSNN[21.1237]GSQFYIR	1237	2	20.9797	127.039	1	b	1	38.7319	73.6757							17.1809	50.2504			182.012			37.5341	49.4448		34.2417	23.1149					75.0654	36.7679		66.8521
GAS1-N40GS	FFYSNN[21.1237]GSQFYIR	1237	2	20.9797	138.055	2	b	1	132.755	113.32		55.4709				106.011	11.2451	41.0608		8.99031	32.0921			81.2725	17.2901	70.209	183.664	67.6414	24.2188	7.18686	35.7317	49.7868	19.302	22.0739	11.9447	30.6022
GAS1-N40GS	FFYSNN[21.1237]GSQFYIR	1237	2	20.9797	145.049	3	b	1		94.8552	131.14	85.1584	209.105	188.08	33.2599	25.1878	12.2185					39.5927	15.6079			59.7172	39.0536	154.677	21.8087	80.0529	112.601	117.533			32.7269		28.3649
GAS1-N40GS	FFYSNN[21.1237]GSQFYIR	1237	2	20.9797	163.06	4	b	1	39.0327		157.639		100.114	163.15		45.2192			36.4354	73.5684	293.254	16.998	58.1845			210.452	66.2524					51.237	40.1723	39.2113	50.2322	41.6031	66.112
GAS1-N40GS	FFYSNN[21.1237]GSQFYIR	1237	2	20.9797	168.065	5	b	1	114.355					45.2365		40.3013	30.6962	120.299	102.318	67.5032	101.697		37.6685	68.9203		41.3481	32.9511	75.0682	28.1519	70.2165	48.1578	24.1521
GAS1-N40GS	FFYSNN[21.1237]GSQFYIR	1237	2	20.9797	186.076	6	b	1	30.8779		33.8912	40.7637	86.1552	177.036	33.3977	145.603	18.3399		113.123			24.9112	35.0921		50.6249	34.5418	56.5783		20.883	52.7477		31.3521		50.1062
GAS1-N40GS	FFYSNN[21.1237]GSQFYIR	1237	2	20.9797	204.087	7	b	1		79.3555	124.964	56.7874	33.8119	26.2697	17.2572	73.4566		35.5387	34.5583	73.2975	52.1608	233.539	61.1468	109.779	39.1687				42.5583	97.9982	69.2426	99.8951	25.6572	50.6907		73.4756	32.0776
GAS1-N40GS	FFYSNN[21.1237]GSQFYIR	1237	2	20.9797	366.139	8	b	1		381.283			262.216			33.437	18.791	42.2247		125.059						23.0464	32.1821	35.9536		33.3778		19.5705	21.6849	50.673	163.775		36.7538
GAS1-N40GS	FFYSNN[16.1237]GSQFYIR	1237	2	15.5915	127.039	1	b	1	1304.18	944.043	2400.28	471.789	966.384	1326.7			763.151	236.639	158.048	2097.14	883.096	324.975	243.063	191.881	663.141	749.903	497.901	555.862	531.939	593.032	802.827	110.638	101.792	124.531	1313.36	25.6706	1705.23	2124.15
GAS1-N40GS	FFYSNN[16.1237]GSQFYIR	1237	2	15.5915	138.055	2	b	1	4645.17	5392.67	4200.5	649.087	1036.36				1311.08	222.66	246.678	4092.86	1381.58	266.876	1861.52	1215.28	1877.41	1460.78	690.469	1081.04	905.642	1775.32	1397.21	555.261	1035.34	288.036	1458.35		4068.89	39157.8
GAS1-N40GS	FFYSNN[16.1237]GSQFYIR	1237	2	15.5915	145.049	3	b	1	2382.19	843.958	3629.01	645.075	1201.13	2267.18			1655.92	169.772	411.657	2826.51	1911.18	837.95	547.317	851.064	1459.87	1278.14	1020.82	1396.11	1110.73	580.085	970.265	526.763	80.2244		1960.53	314.105	3122.75	5391.36
GAS1-N40GS	FFYSNN[16.1237]GSQFYIR	1237	2	15.5915	163.06	4	b	1	4017.28	1450.15	5957.43	3004.74	5582.65	2642.49			1104.38	654.064	1024.4	2690.93	4306.83	103.915	1221.99	632.454	2901.07	3366.94	1329.69	1198.58	1438.9	1312.98	1093.62	648.504	221.296	437.508	1873.18		5606.22	9969.82
GAS1-N40GS	FFYSNN[16.1237]GSQFYIR	1237	2	15.5915	168.065	5	b	1	1454.59	2142.64	3572.03	935.277	1900.22	403.377	664.277	822.848	1636.34	243.468	402.604	2458.55	1017.37	708.578	1341	632.129	1252.3	701.81	532.514	483.492	122.332	1150.03	638.745	218.151	51.9264	81.2956	571.147		2534.84	21042.7
GAS1-N40GS	FFYSNN[16.1237]GSQFYIR	1237	2	15.5915	186.076	6	b	1	944.766	492.917	2474.47	346.344	595.776	971.59	270.696	176.383	700.68	198.276		1297.44	445.552		412.61	165.206	461.76	376.982	608.001		131.415	472.908	244.24	765.154	66.6409	98.1376	498.577	44.6696	1966.02	16214.8
GAS1-N40GS	FFYSNN[16.1237]GSQFYIR	1237	2	15.5915	204.087	7	b	1	5410.73	3213.45	6626.09	841.157	3880.82	1875.29		621.72	2842.31	1070.33		6107.93	2525.73	710.586	1854.2	1105.79	2587.84	1520.15	1201.87	1495.23	2566.55	1359.77	2337.2	1272.47	411.664	208.266	1449.47		6900.77	17227.6
GAS1-N40GS	FFYSNN[16.1237]GSQFYIR	1237	2	15.5915	366.139	8	b	1	850.217		4878.84	481.966	1044.93	1824.35			1239.64	94.1284		2070.88	1216.54	88.7051	635.846	819.637	2074.92	335.081	457.308	328.08	775.166		468.811	243.581	372.641	91.398	1183.72		2804.83	21838
GAS1-N40GS	FFYSNN[13.1237]GSQFYIR	1237	2	12.2684	127.039	1	b	1	5840.34	10862.5	14135	3033.2	9053.13	13994.5	5303.58	6685.31	5567.42	2791.16	3241.72	7979.38	4174.57	7742.26	3085.42	3660.18	8371.44	4868.45	3505.62	2515	8501.46	3781.45	2925.46	2042.91	1451.38	2592.84	2711.96	7148.03	6253.05	1425.95
GAS1-N40GS	FFYSNN[13.1237]GSQFYIR	1237	2	12.2684	138.055	2	b	1	9412.95	15915.9	21797.3	6440.69	17540.3	17150.4	9518.82	10238.2	8266.39	5593.54	2884.85	11556.7	4486.61	11755.2	3690.94	5310.21	15565.8	5547.94	6104.79	2983.12	12902.2	12282.3	8542.41	7194.61	2952.79	2995.59	4683.23	8221.88	7488.37
GAS1-N40GS	FFYSNN[13.1237]GSQFYIR	1237	2	12.2684	145.049	3	b	1	12592.2	22180.5	27644.2	5159	16835.9	19975.8	10323.6	13375	11081.7	5179.2	4488.77	15301.8	4016.35	12682.8	3095.14	4527.77	11539.6	5121.37	5375.85	4490.57	15676.4	6413.9	5272.49	4315.5	2712.88	5322.6	3520.79	9490.79	8110.7	4068.61
GAS1-N40GS	FFYSNN[13.1237]GSQFYIR	1237	2	12.2684	163.06	4	b	1	27663.9	43924.6	55196.2	9108.85	27228.5	25290	21143.9	27228.1	19175.7	11309.9	5335.16	32065.1	8564.87	22241.3	4929.76	6228.46	31310.5	8930.26	10861.3	5815.9	32300.1	11308.6	7280.51	6374.96	4423.52	5437.61	5163.97	12392	10740.6	6143.88
GAS1-N40GS	FFYSNN[13.1237]GSQFYIR	1237	2	12.2684	168.065	5	b	1	6185.78	10726.9	14534.5	3627.4	10013	8433.17	5628.22	9066.94	5099.32	3163.75	1747.7	8778.21	4046.63	7407.99	1734.39	2725.16	9260.7	3227.16	2423.75	2069.14	7874.98	8565.68	4582.08	4080.93	2106.36	2130.85	2707.52	3928.51	2988.33
GAS1-N40GS	FFYSNN[13.1237]GSQFYIR	1237	2	12.2684	186.076	6	b	1	3251.12	5928.36	8126.31	2293.39	5711.21	5432.16	3199.49	4390.82	2310.23	1619.72	1385.78	4398.23	1281.24	4698.38	1851.09	1542.59	5623.1	1957.47	1712.99	1047.13	4979.29	3981.82	3137.58	2365.41	698.082	1176.43	1521.49	3049.63	2144.28	738.5
GAS1-N40GS	FFYSNN[13.1237]GSQFYIR	1237	2	12.2684	204.087	7	b	1	17367.6	28126.5	42636.9	10981	29433.6	32620.3	16040.6	25218.6	15637.9	8263.74	7026.74	23476.1	7730.88	22718.9	6093.78	8065.3	30794.9	11851.7	11319.8	6253.12	28066.1	16799.4	10797.5	10237.4	4521.62	7149.88	7092.89	13330.5	12131.2	4421.02
GAS1-N40GS	FFYSNN[13.1237]GSQFYIR	1237	2	12.2684	366.139	8	b	1	7289.67	9080.5	12845.6	3307.02	10484.1	13354	5406.56	7088.45	6327.25	3215.97	1447.76	7010.36	2780.82	8745.24	2889.8	2544.08	7737.97	3753.65	3226.96	2373.03	9562.88	6159.44	4277.62	4259.38	2731.56	2595.32	2493.47	3917.84	4341.27
GAS1-N40GS	FFYSNN[5.1237]GSQFYIR	1237	2	4.97571	127.039	1	b	1		112.599	38.8479	35.1847	32.9978	25.3095	64.0935	40.9949	102.602		37.5094	26.8619			34.7988				46.2885		48.0452		23.5693	71.198			21.6873	16.5055
GAS1-N40GS	FFYSNN[5.1237]GSQFYIR	1237	2	4.97571	138.055	2	b	1			36.9757			164.163	40.0976				16.7062		69.7403	46.4224				114.235		36.9088	75.0623		13.5511							150.13
GAS1-N40GS	FFYSNN[5.1237]GSQFYIR	1237	2	4.97571	145.049	3	b	1	37.1035	38.2036	37.5281	71.832	133.875		49.3351	36.3144	25.3187		96.3016				36.0648		25.5468		197.098		112.571	146.025		37.4874				117.688
GAS1-N40GS	FFYSNN[5.1237]GSQFYIR	1237	2	4.97571	163.06	4	b	1		38.586		19.8007	64.5408	22.0912		93.6634	175.105	133.99	65.8085	53.3765	28.5329	107.315		7.70171		20.1818	134.196		76.426	111.688		124.723		37.7991		134.483	97.156
GAS1-N40GS	FFYSNN[5.1237]GSQFYIR	1237	2	4.97571	168.065	5	b	1		20.453	79.2851		37.5312	37.5035						35.1853	35.7376	35.5317			71.9262		38.1246					37.1498		33.0018	37.5337		32.1746	37.5298
GAS1-N40GS	FFYSNN[5.1237]GSQFYIR	1237	2	4.97571	186.076	6	b	1	37.5342				37.5345				37.5332											50.3221	37.5297	111.656	23.5693		41.3307
GAS1-N40GS	FFYSNN[5.1237]GSQFYIR	1237	2	4.97571	204.087	7	b	1	16.6657	37.5203	203.933		63.7194	64.0571		35.1845		21.2803	41.8874	29.0769	19.03			25.2855	31.8454	52.3319	34.3019			26.9501			37.5331		74.8877			48.0813
GAS1-N40GS	FFYSNN[5.1237]GSQFYIR	1237	2	4.97571	366.139	8	b	1	36.7665					37.4892				35.1841	35.1854			75.0696	37.5347	35.8125				37.5341
GAS1-N40GS	FFYSNN[22.1237]GSQFYIR	1237	2	21.9165	127.039	1	b	1	74.2526		103.566	55.3192	27.5762		86.4956	16.3516	99.0516	15.4635	31.1455	29.5883		19.6414		37.51	54.4414	26.9243	71.4832	98.608			32.3078	36.0403		75.0401				98.7405
GAS1-N40GS	FFYSNN[22.1237]GSQFYIR	1237	2	21.9165	138.055	2	b	1	31.8782	36.8966		43.1066	168.71			148.348	6.8915	175.822	66.9164		58.512		13.9866	44.3776	23.174	57.2076		25.5339		9.72521	112.21	82.1721			62.8326		45.6692	172.61
GAS1-N40GS	FFYSNN[22.1237]GSQFYIR	1237	2	21.9165	145.049	3	b	1	54.7073	70.7498			70.2096	115.805	35.9665	113.349	32.15	36.8535	60.3849	34.8055					72.14	92.8442	35.4254		66.8602					38.058	28.6044	101.344	104.195	306.213
GAS1-N40GS	FFYSNN[22.1237]GSQFYIR	1237	2	21.9165	163.06	4	b	1		83.944	282.031	62.9762	152.232	100.531		52.9915	101.407	15.456	27.6567		256.488	300.943	162.052		49.7866	291.691	21.267	73.555	26.7059		52.9163	115.44		55.1827	41.7874	40.5306		364.851
GAS1-N40GS	FFYSNN[22.1237]GSQFYIR	1237	2	21.9165	168.065	5	b	1	30.3382		57.3404	178.982	27.355	193.99		41.8582	36.3481	26.9135	72.7435	103.335		96.0265		48.7507	126.056	68.7048				54.9653		73.5988	30.8772			33.7518
GAS1-N40GS	FFYSNN[22.1237]GSQFYIR	1237	2	21.9165	186.076	6	b	1	164.191	24.3507	10.0766	142.066		51.0896	71.5598	233.417	56.3246	15.0958	158.399		42.5546	49.8056	40.4628			5.08691	147.989			59.7111	55.1238		75.0679	26.9253		67.6549	33.4068	490.472
GAS1-N40GS	FFYSNN[22.1237]GSQFYIR	1237	2	21.9165	204.087	7	b	1		64.9448				142.665	168.137	48.9262		76.8322	28.5369	246.345	29.524	188.773		139.887	135.031	78.9129	17.5086			99.8696	66.8479		34.4098	47.6197		66.7065	32.0601
GAS1-N40GS	FFYSNN[22.1237]GSQFYIR	1237	2	21.9165	366.139	8	b	1	30.2525		153.152	182.322				30.3206	26.1808	270.566			37.1293		36.9863		27.0339	10.7313	106.71	87.8417	15.1862	35.098	75.0658	43.6233			183.997	5.72158
GAS1-N40GS	FFYSNN[18.1237]GSQFYIR	1237	2	18.7851	127.039	1	b	1		37.2678	96.9085		389.839				86.2674	29.6027	130.906	90.4695	140.008		30.6639	185.092	321.73	453.693	98.3305			134.962					11.6858		204.896
GAS1-N40GS	FFYSNN[18.1237]GSQFYIR	1237	2	18.7851	138.055	2	b	1		54.7142			402.182			729.053	332.535				530.49	119.703		124.474	847.127	233.384	53.9212		130.944	121.805	45.1031	229.593	28.4924				42.2967
GAS1-N40GS	FFYSNN[18.1237]GSQFYIR	1237	2	18.7851	145.049	3	b	1		18.0457			699.244		75.8626	387.354		318.098	146.587	384.776	661.389		263.24	277.897	472.578	635.189	87.3483	35.9088	46.8499	60.576	32.5874	33.4208		47.6609			50.8497
GAS1-N40GS	FFYSNN[18.1237]GSQFYIR	1237	2	18.7851	163.06	4	b	1					1109.86		49.9684	270.534	25.3443	63.3727	400.569		469.533	74.0994	23.8114	243.109	639.839	638.434	20.8261		63.3909	69.9953	308.349			224.63			56.8132
GAS1-N40GS	FFYSNN[18.1237]GSQFYIR	1237	2	18.7851	168.065	5	b	1	52.949		69.1838		435.165		217.909	377.242	22.6116	50.4355	368.813	24.2795	428.134	42.739	412.43	169.219	755.986	252.254			84.1805			159.577	61.2928	25.3571
GAS1-N40GS	FFYSNN[18.1237]GSQFYIR	1237	2	18.7851	186.076	6	b	1	20.4815	36.6569	242.026		176.126			221.758	43.6953	48.1925	134.597	33.5938	301.118	56.7048	70.2707		251.688	93.9808		13.6533	47.3857		35.6806		39.4489	31.4221	179.338		25.6594
GAS1-N40GS	FFYSNN[18.1237]GSQFYIR	1237	2	18.7851	204.087	7	b	1		23.5753	40.8851		1125.12			497.503			769.033		954.678	326.921	36.6652	196.808	1306.98	1169.02			99.769	120.975	192.552		20.8386	239.946			136.641
GAS1-N40GS	FFYSNN[18.1237]GSQFYIR	1237	2	18.7851	366.139	8	b	1		14.36			275.913		77.7025	312.772	246.044	126.669	299.572		517.923	14.2956	195.462		145.135	287.33		33.1866	155.665		163.312	109.844	84.2128	224.244	76.5574
GAS1-N40GS	FFYSNN[11.1237]GSQFYIR	1237	2	11.3432	127.039	1	b	1	8655.78	10776.8	12115.6	2928.43	6272.74	7268.92		11057.8	8907.56	2590.59		7432.25	12553.1	7850.76	5324.1		11704.4	9479.84	9245.23	6467.98	217.7	269.599	1081.85	338.822		1669.41	185.003	1136.68	1036.6
GAS1-N40GS	FFYSNN[11.1237]GSQFYIR	1237	2	11.3432	138.055	2	b	1	10599.3	11992.2	16208.2	3715.59	7840.68	8558.62	880.177	12850.3	10518.6	4080.21	353.43	10576.4	15258.1	11129.6	6833.18	550.184	14604.5	9101.95	10184.3	7725.46	271.164		2668.01	500.34		4320.75	173.317	2783.8	1945.16
GAS1-N40GS	FFYSNN[11.1237]GSQFYIR	1237	2	11.3432	145.049	3	b	1	17247.8	22186.4	26403.1	4880.87	12927.4	13876.9	963.54	23591.5	14264.7	5997.94	1441.35	14520.5	23519.5	17562.4	12953.7		23066	17863	17605.4	12395.6	230.343	278.59	2362.9	384.959	567.4	3841.18		2041.04	3117.14
GAS1-N40GS	FFYSNN[11.1237]GSQFYIR	1237	2	11.3432	163.06	4	b	1	30925.7	28609.3	35296.6	8766.14	20940.3	22831.7	1651.63	34508.4	23339.7	9621.23	701.076	28626.4	38958.6	28407.1	15254.5		36625.9	29322.7	27941.6	20081.8			5458.84			7401	275.127	4498.15	5064.08
GAS1-N40GS	FFYSNN[11.1237]GSQFYIR	1237	2	11.3432	168.065	5	b	1	8542.12	8563.85	9929.76	3028.69	5757.26	6198.22		11326.4	6705.37	2924.85	307.105	6886.2	11786.8	8355.14	4545	348.07	9523.03	8380.02	7732.41	7290.61		110.785	282.754	141.597	753.252	3353.7	230.919	2137.25	1398.99
GAS1-N40GS	FFYSNN[11.1237]GSQFYIR	1237	2	11.3432	186.076	6	b	1	6479.41	7421.09	4942.98	2634.52	2252.23	4749.58	390.73	4631.48	2586.48	1503.67		5403.64	5848.35	4510.84	2590.74	329.484	2854.63	3766.91	3809.26	2903.98	532.078	445.253	935.917		126.981	1676.93		544.284	659.152
GAS1-N40GS	FFYSNN[11.1237]GSQFYIR	1237	2	11.3432	204.087	7	b	1	18554.6	20381.8	28817	7714.52	14799.3	16901.8	3157.34	23652.8	16617.8	6647.09	1146.12	19206.3	32726.2	21845.1	12880.5		26976.5	20868.3	20633.4	16018.7			2132.38	501.253	319.679	8543.81	893.351	3625.13	3675.66
GAS1-N40GS	FFYSNN[11.1237]GSQFYIR	1237	2	11.3432	366.139	8	b	1	8027.44	10482.9	11897.1	2649.51	6259.69	6856.85	939.609	10116.8	6722.89	3897.62		7719.22	15532	9912.68	6233.33	601.71	11486.7	8642.47	6976.69	6058.03		73.5692	1132.6	714.289	39.6499	2398.38		776.94	997.16
GAS1-N40GS	FFYSNN[23.1212]GSQFYIR	1212	2	23.0313	127.039	1	b	1	25.6319	70.0598	35.5381		81.5751		64.1236				36.3264		125.91				96.14	130.026		92.1612							65.2443	37.2778	26.7045	351.658
GAS1-N40GS	FFYSNN[23.1212]GSQFYIR	1212	2	23.0313	138.055	2	b	1	102.492		84.3242		72.7698	348.742			28.3388				18.7021		94.6115	27.6564	71.048	74.8589		111.011	79.0142	106.342				104.243	101.103	30.3613		402.91
GAS1-N40GS	FFYSNN[23.1212]GSQFYIR	1212	2	23.0313	145.049	3	b	1	120.894	53.7897	173.506	4.64558	255.193			24.983	54.4702	33.0968	67.5669	47.5363	71.5656	196.563	64.2585	40.854	117.209	34.0287		46.5112	48.1622	107.049	61.6856	74.7866	64.4606	14.7008		26.9247	29.5332	157.012
GAS1-N40GS	FFYSNN[23.1212]GSQFYIR	1212	2	23.0313	163.06	4	b	1	290.604	87.5138			378.062	154.827		16.5207		84.6502		25.5109	87.7877	248.356		125.862		59.3458	66.6785		28.2279				68.943	68.4693	260.943	30.4243		959.636
GAS1-N40GS	FFYSNN[23.1212]GSQFYIR	1212	2	23.0313	168.065	5	b	1	66.8643	29.8779			174.932		42.9414						36.7792	58.9863	29.6747		12.942	32.1855	36.0777			36.4108	53.5656	37.4951	112.132			70.2896	110.222
GAS1-N40GS	FFYSNN[23.1212]GSQFYIR	1212	2	23.0313	186.076	6	b	1	67.1538		37.4961	46.0323		40.3478		22.4195		70.5276	37.4412		117.406	31.959	103.702			66.444		43.9834	30.671		33.1833				96.561	13.0016
GAS1-N40GS	FFYSNN[23.1212]GSQFYIR	1212	2	23.0313	204.087	7	b	1		144.601		33.1691	267.596	89.882	74.2767	87.0439	104.106	74.2362	44.9908	98.6857	420.913	108.993		76.8152	18.5821	324.458				36.9985	82.5725	30.3114		12.6346	74.4492		52.5417	297.062
GAS1-N40GS	FFYSNN[23.1212]GSQFYIR	1212	2	23.0313	366.139	8	b	1	81.1964		162.011		94.4965	55.8357	12.3179		53.7003	129.898	187.541	39.0069	295.869	136.481	74.0395			77.9545	147.375	47.8189	127.969		39.1896		33.1063					1034.89
GAS1-N40GS	FFYSNN[14.1212]GSQFYIR	1212	2		127.039	1	b	1							59.2717								1298.09							736.38	1546.08	2843.34			1073.36
GAS1-N40GS	FFYSNN[14.1212]GSQFYIR	1212	2		138.055	2	b	1							1214.83								2545.69							3270.26	3699.5	6115.17	750.397		2983.31
GAS1-N40GS	FFYSNN[14.1212]GSQFYIR	1212	2		145.049	3	b	1							507.579								1162.79							1984.86	1261.7	4720.01			3279.4
GAS1-N40GS	FFYSNN[14.1212]GSQFYIR	1212	2		163.06	4	b	1							397.456								3112.39							2415.51	2840.06	5672.38			4587.54
GAS1-N40GS	FFYSNN[14.1212]GSQFYIR	1212	2		168.065	5	b	1							1940.33								1469.39							1843.49	2652.56	4237.88	224.617		1874.58
GAS1-N40GS	FFYSNN[14.1212]GSQFYIR	1212	2		186.076	6	b	1															1915.63							584.927	1665.8	1087.73			233.534
GAS1-N40GS	FFYSNN[14.1212]GSQFYIR	1212	2		204.087	7	b	1							1205.96								4490.28							4219.17	5143.52	7686.05	106.65		3630.42
GAS1-N40GS	FFYSNN[14.1212]GSQFYIR	1212	2		366.139	8	b	1							395.451								1388.37							1924.59	1568.25	3247.78			3268.96
GAS1-N40GS	FFYSNN[5.1212]GSQFYIR	1212	2	5.2532	127.039	1	b	1		85.3642	37.3883	37.5992		135.779						124.415	37.3162	9.51272	39.9377	53.4406	75.2306	10.7455	23.9746	8.96546	14.4449	37.5336	37.5089	37.3889					28.7381	29.3086
GAS1-N40GS	FFYSNN[5.1212]GSQFYIR	1212	2	5.2532	138.055	2	b	1	112.53		56.3476	99.7981	35.8236		41.512	109.802	73.2903		29.5079		29.1589			34.7442	102.364	74.4194		37.5304			18.5682				34.1452	75.0059		38.4452
GAS1-N40GS	FFYSNN[5.1212]GSQFYIR	1212	2	5.2532	145.049	3	b	1	52.4157	33.051	202.868	73.6307	73.6098	52.0189		75.0668				37.5081		65.8537	159.356		37.5336		112.094	219.802	28.9168	28.9641	147.813		33.3896		75.4705		187.458	37.9039
GAS1-N40GS	FFYSNN[5.1212]GSQFYIR	1212	2	5.2532	163.06	4	b	1	25.119	250.423	138.324	51.1992	37.5281	84.517			102.831		19.3234			167.974	195.411	37.5214	10.3665		74.2727		66.9148		34.0966	81.3757	21.9846	36.7027		72.8937	111.502	37.5322
GAS1-N40GS	FFYSNN[5.1212]GSQFYIR	1212	2	5.2532	168.065	5	b	1				57.976		73.3419	74.7497	112.599	34.7429	37.5097		12.0492							34.5429				92.2728		37.535	36.3499
GAS1-N40GS	FFYSNN[5.1212]GSQFYIR	1212	2	5.2532	186.076	6	b	1		37.3669	53.1877	37.5293			37.5332			37.5329	37.5341		16.5541					30.2293				37.5337		37.5301				37.5326	28.3597
GAS1-N40GS	FFYSNN[5.1212]GSQFYIR	1212	2	5.2532	204.087	7	b	1	37.5273		37.5334	109.836		183.352	35.584			37.3674	112.601	33.3968	37.2698	24.0218		37.269		65.6444			97.6258	76.7284	38.2047		67.3881		72.3771	36.3776	34.047
GAS1-N40GS	FFYSNN[5.1212]GSQFYIR	1212	2	5.2532	366.139	8	b	1				71.5269										36.8719					35.1841
GAS1-N40GS	FFYSNN[3.1212]GSQFYIR	1212	2	2.89819	127.039	1	b	1		32.5322	23.5688	3.98367					37.535	32.0144	32.0774		60.6755							36.8716	33.304	68.1691							20.4544
GAS1-N40GS	FFYSNN[3.1212]GSQFYIR	1212	2	2.89819	138.055	2	b	1	27.8456	75.0642		23.5686		31.053		5.65604	34.7466		37.5327	37.5091		35.1844						12.7314			37.5297	37.534	37.5334	37.534		15.5859
GAS1-N40GS	FFYSNN[3.1212]GSQFYIR	1212	2	2.89819	145.049	3	b	1			15.5269		35.0916		37.1385	36.8294					75.0689	65.3971				104.658	41.35	35.1844	36.3621		17.6278	37.5331	20.398	34.1081	40.7739			65.8611
GAS1-N40GS	FFYSNN[3.1212]GSQFYIR	1212	2	2.89819	163.06	4	b	1		59.4955	23.5688		84.8213	35.1842		33.4767		29.3435				36.3945	23.5669	46.4186		75.0616	37.3889		37.5298	59.1359			34.6421	35.7807	37.4852	35.184	37.107	11.641
GAS1-N40GS	FFYSNN[3.1212]GSQFYIR	1212	2	2.89819	168.065	5	b	1	37.5345		23.0353													37.3234			37.7496							8.89255	32.9202		75.0371	13.5982
GAS1-N40GS	FFYSNN[3.1212]GSQFYIR	1212	2	2.89819	186.076	6	b	1				23.5686			37.5341			36.7675					31.0418	36.8726
GAS1-N40GS	FFYSNN[3.1212]GSQFYIR	1212	2	2.89819	204.087	7	b	1	37.534				8.35807	30.6104					37.5328				65.8609			112.6				36.8715						111.716	88.3625
GAS1-N40GS	FFYSNN[3.1212]GSQFYIR	1212	2	2.89819	366.139	8	b	1		37.5338	23.5688				37.5333		37.5281			35.8111	38.2056		36.8716								4.24077					20.4533
GAS1-N40GS	FFYSNN[21.1212]GSQFYIR	1212	2	20.8865	127.039	1	b	1	111.449		85.3527	26.3635							74.7124	74.3988	34.141				29.0124				52.4963	70.7252			20.4537	35.8876		37.6936	46.8341	322.405
GAS1-N40GS	FFYSNN[21.1212]GSQFYIR	1212	2	20.8865	138.055	2	b	1		216.908	247.84		38.7817		7.31433	56.0668	22.0944	122.563			57.9235		13.006		66.2947	11.1096	49.9708	49.866	53.7585	10.0371			30.2175	59.1322	80.2599	5.98732	20.4837
GAS1-N40GS	FFYSNN[21.1212]GSQFYIR	1212	2	20.8865	145.049	3	b	1	83.6918		179.227	83.1742	82.8554	49.2464	28.1279	29.2273	67.5733	33.4783	20.4529			51.3918	113.589	73.6904	45.5109	72.5192			72.4711		38.9208	34.8718		138.775	111.461	48.0122	36.093
GAS1-N40GS	FFYSNN[21.1212]GSQFYIR	1212	2	20.8865	163.06	4	b	1	294.195			151.446	109.358	129.555	22.2841				36.2401	165.473	226.847	71.0183	57.0835		105.371	74.867	7.87425		55.3702	34.0747	26.9247	10.5859	36.0635		53.8383			93.6806
GAS1-N40GS	FFYSNN[21.1212]GSQFYIR	1212	2	20.8865	168.065	5	b	1			29.3202	122.463	66.7438	9.13299	20.1821	41.5382			24.252	31.306	79.2354	139.214		32.3854	31.0521		31.0512				103.191	34.001	75.0786		166.609	25.8198	35.4699	78.7899
GAS1-N40GS	FFYSNN[21.1212]GSQFYIR	1212	2	20.8865	186.076	6	b	1		121.391	86.8607		107.842	29.0358			61.3841	31.7785		50.4497			83.1379	92.4607			35.9756					15.3393	36.5088	34.3758		34.9223	13.1356	276.508
GAS1-N40GS	FFYSNN[21.1212]GSQFYIR	1212	2	20.8865	204.087	7	b	1		61.5032	216.571	31.1898	119.795	158.352	125.013				93.3643	16.0555		249.979		42.2606	37.5714	15.7952		189.091	187.944	87.8426	38.3188		120.906	34.0473
GAS1-N40GS	FFYSNN[21.1212]GSQFYIR	1212	2	20.8865	366.139	8	b	1	271.094		86.103	17.9462	200.79		200.422	13.3991	15.1406	34.79	28.7745			166.466				81.1764		30.2647	14.4604		53.7825	25.9413	32.6465	64.7666
GAS1-N40GS	FFYSNN[25.1212]GSQFYIR	1212	2	25.1913	127.039	1	b	1	75.0678	76.1573	23.5603				37.5328		34.0482					77.876																37.3764
GAS1-N40GS	FFYSNN[25.1212]GSQFYIR	1212	2	25.1913	138.055	2	b	1		51.8551	29.0753	35.0957	20.1738		30.7308	30.6721	20.3972			36.7676	34.6474	24.3661		31.0531	11.1317	30.0504									94.6584	40.6326	62.1066	39.9821
GAS1-N40GS	FFYSNN[25.1212]GSQFYIR	1212	2	25.1913	145.049	3	b	1				111.602		29.9254		37.4676		67.3962				120.995	66.9138			10.8201			4.68594		14.0767	37.1622	37.5086			105.72	14.0694	96.6346
GAS1-N40GS	FFYSNN[25.1212]GSQFYIR	1212	2	25.1913	163.06	4	b	1	37.225	16.5071				31.3948						37.5335	11.6449	129.213	16.8246		5.6435				41.6565		31.0543			5.82455		37.533	28.0997
GAS1-N40GS	FFYSNN[25.1212]GSQFYIR	1212	2	25.1913	168.065	5	b	1																	3.9827	33.449			36.8722						37.5335		14.0766	18.7978
GAS1-N40GS	FFYSNN[25.1212]GSQFYIR	1212	2	25.1913	186.076	6	b	1	19.1757		29.1162	37.3879	37.5327						112.602	109.424						32.3321	37.5335	37.17			23.5698	37.5293		36.3987
GAS1-N40GS	FFYSNN[25.1212]GSQFYIR	1212	2	25.1913	204.087	7	b	1		139.031		209.992		20.4536		11.9395						80.4593	26.0921	23.5606	22.951	92.0151		29.6743					37.5295	22.1107	17.9002			43.4283
GAS1-N40GS	FFYSNN[25.1212]GSQFYIR	1212	2	25.1913	366.139	8	b	1	36.7674		31.0534					57.9349	37.5329	74.3851	36.67	35.8217	13.8593	37.5327				29.1146	150.132
GAS1-N40GS	FFYSNN[27.1212]GSQFYIR	1212	2	27.0676	127.039	1	b	1	16.2961	14.0766				36.351						28.3782		37.5326																37.533
GAS1-N40GS	FFYSNN[27.1212]GSQFYIR	1212	2	27.0676	138.055	2	b	1						16.2817	31.0527						37.389																	33.6072
GAS1-N40GS	FFYSNN[27.1212]GSQFYIR	1212	2	27.0676	145.049	3	b	1			75.0648		37.5328		23.5697		37.5289									75.0651
GAS1-N40GS	FFYSNN[27.1212]GSQFYIR	1212	2	27.0676	163.06	4	b	1		23.5687			37.5298	37.5077	21.8552																							101.405
GAS1-N40GS	FFYSNN[27.1212]GSQFYIR	1212	2	27.0676	168.065	5	b	1			37.5319																											33.4843
GAS1-N40GS	FFYSNN[27.1212]GSQFYIR	1212	2	27.0676	186.076	6	b	1
GAS1-N40GS	FFYSNN[27.1212]GSQFYIR	1212	2	27.0676	204.087	7	b	1	36.3507				53.3768				37.5304				35.1837					37.5325						37.5492			37.5332			32.853
GAS1-N40GS	FFYSNN[27.1212]GSQFYIR	1212	2	27.0676	366.139	8	b	1	37.172				37.5326							31.0551		29.0064										37.503			13.626			34.644
GAS1-N40GS	FFYSNN[24.1212]GSQFYIR	1212	2	23.6484	127.039	1	b	1	7.40836	69.2549	36.5172			53.0672	115.26	70.2505	36.7516			149.992	179.768		15.2754		101.482	26.9219									26.0853			211.993
GAS1-N40GS	FFYSNN[24.1212]GSQFYIR	1212	2	23.6484	138.055	2	b	1	71.3534		27.6075	33.4762	114.013	61.8961	148.551		261.803				108.012	34.3958	148.549	82.0627	20.3663	55.8032		35.9392		37.4675	60.8881		11.7459	50.4747	6.24193	40.7909	74.1938
GAS1-N40GS	FFYSNN[24.1212]GSQFYIR	1212	2	23.6484	145.049	3	b	1		75.0676		112.589	4.99807	117.532		23.3879		28.4856	37.5312	190.51			43.0601		203.091	15.6167	70.5671	72.3938			57.6526			39.4752	112.473		26.8534	138.605
GAS1-N40GS	FFYSNN[24.1212]GSQFYIR	1212	2	23.6484	163.06	4	b	1		77.354			49.0391			37.5329	113.262		28.0807		84.2918					218.73			170.247					28.7414	88.8797	36.8712	70.5068	351.871
GAS1-N40GS	FFYSNN[24.1212]GSQFYIR	1212	2	23.6484	168.065	5	b	1	143.067	25.4651				9.1404				18.4517					29.6747	35.1827	77.6522	33.9678	26.9257		28.7619	37.6357	79.5865	37.5329				36.4782	37.5332	55.9725
GAS1-N40GS	FFYSNN[24.1212]GSQFYIR	1212	2	23.6484	186.076	6	b	1	51.9585		34.9778	31.8534		63.7091	37.534	13.2604		58.1225			128.353	32.0343	101.084	37.5311		33.4767	233.473	31.0517	75.0679		13.4121		37.4887		36.0251			464.769
GAS1-N40GS	FFYSNN[24.1212]GSQFYIR	1212	2	23.6484	204.087	7	b	1		176.356		171.599	85.6938	283.531	142.66	78.6609			83.0602	66.1091		123.913			9.58641	112.23	68.0827		46.4193		137.488	37.5964	107.36	29.3833	94.8659	103.346		564.084
GAS1-N40GS	FFYSNN[24.1212]GSQFYIR	1212	2	23.6484	366.139	8	b	1	14.3866		36.6714			17.9066		13.0488	37.5337	19.4907	25.6964				75.0631		36.3476	32.1809		60.6348		36.5435	56.9613	24.6306		72.0909	36.3507	37.3871
GAS1-N40GS	FFYSNN[18.1212]GSQFYIR	1212	2	18.3785	127.039	1	b	1	69.419	248.857	137.925	141.813	91.4882	199.214					37.4243	156.442	166.328		47.2372		74.9729	317.315		57.8203		84.9274		102.572		29.6042			48.331
GAS1-N40GS	FFYSNN[18.1212]GSQFYIR	1212	2	18.3785	138.055	2	b	1		344.422		577.05	53.9667	459.492	170.49	512.116	66.1855		419.767				475.827	327.051	196.492	250.888	64.3772	373.461	38.0902	479.488	643.19	417.019	241.443	269.934	884.988	100.078	364.891	28665.2
GAS1-N40GS	FFYSNN[18.1212]GSQFYIR	1212	2	18.3785	145.049	3	b	1	69.5403		173.325	56.1738	88.4891	153.02	103.668		178.712	11.8346	242.059	11.4296							154.697	76.198	24.6213		70.0525	89.7799	117.255	129.738			53.1822
GAS1-N40GS	FFYSNN[18.1212]GSQFYIR	1212	2	18.3785	163.06	4	b	1	75.3192		29.5169	17.7448	358.404	188.945	54.7692		198.81				77.1652			13.049	24.8048	307.709	41.7321	17.689	250.594		362.502	116.995	140.014	184.562	320.018		181.421
GAS1-N40GS	FFYSNN[18.1212]GSQFYIR	1212	2	18.3785	168.065	5	b	1		156.924	195.687	141.341	45.8017		370.671		324.52		106.328		69.9923	91.1254	338.851	156.051	199.226		39.9115	194.201		110.267	147.381	240.931	208.523	456.425	302.451		64.276	12599.1
GAS1-N40GS	FFYSNN[18.1212]GSQFYIR	1212	2	18.3785	186.076	6	b	1		249.264			115.928	239.64	62.2706	50.516	164.251	9.93089	21.4178	23.6139	28.5124	167.07	84.9458	32.6206	116.162	50.2315	52.0082			138.522	135.421		358.938		266.344	49.425		5105.92
GAS1-N40GS	FFYSNN[18.1212]GSQFYIR	1212	2	18.3785	204.087	7	b	1		124.111		505.044	461.94	420.461	337.448	131.266	72.0614		219.904	47.9451	450.97			370.987	103.662			79.0698	187.557	537.538	604.904	344.174	213.826	296.87	408.075	294.504	442.919	14889.9
GAS1-N40GS	FFYSNN[18.1212]GSQFYIR	1212	2	18.3785	366.139	8	b	1	25.573	188.277		261.09	316.239		210.951	29.581	59.6687	258.729	104.135	346.761	77.51		304.091	69.3274	518.301	48.2784		111.525		217.289	246.609	261.426	48.0584	344.642	290.073	30.5757	237.808	13469.7
GAS1-N40GS	FFYSNN[30.1212]GSQFYIR	1212	2		127.039	1	b	1
GAS1-N40GS	FFYSNN[30.1212]GSQFYIR	1212	2		138.055	2	b	1
GAS1-N40GS	FFYSNN[30.1212]GSQFYIR	1212	2		145.049	3	b	1
GAS1-N40GS	FFYSNN[30.1212]GSQFYIR	1212	2		163.06	4	b	1
GAS1-N40GS	FFYSNN[30.1212]GSQFYIR	1212	2		168.065	5	b	1
GAS1-N40GS	FFYSNN[30.1212]GSQFYIR	1212	2		186.076	6	b	1
GAS1-N40GS	FFYSNN[30.1212]GSQFYIR	1212	2		204.087	7	b	1
GAS1-N40GS	FFYSNN[30.1212]GSQFYIR	1212	2		366.139	8	b	1
GAS1-N40GS	FFYSNN[19.1212]GSQFYIR	1212	2	18.2688	127.039	1	b	1	19.8498	88.3468	176.532	147.409	52.4124	165.718			154.455	172.434		137.873			37.9826		120.47					58.8215		94.6912		36.8717	53.8082		33.4145
GAS1-N40GS	FFYSNN[19.1212]GSQFYIR	1212	2	18.2688	138.055	2	b	1		75.7668	288.754	292.636		114.879	109.318	74.4947		170.628		9.86238	521.523		310.419		295.752	423.175	16.8433		178.695	487.222	395.109		139.78	257.566	950.227	282.951	342.029
GAS1-N40GS	FFYSNN[19.1212]GSQFYIR	1212	2	18.2688	145.049	3	b	1		36.3988	14.4077	67.0896	113.373	66.4252	78.5584					169.009	18.6966				32.3289	32.0059		20.3347			71.9281	19.3312		178.694			24.6541
GAS1-N40GS	FFYSNN[19.1212]GSQFYIR	1212	2	18.2688	163.06	4	b	1		146.799	33.2587	14.5945				33.3991	81.3055		80.4042			175.921		8.79231	15.5674	143.113	18.9348	32.9294	41.057		351.843			199.277	228.425		211.995
GAS1-N40GS	FFYSNN[19.1212]GSQFYIR	1212	2	18.2688	168.065	5	b	1	62.5139		24.2092	68.174			258.77	87.0997		225.983	65.1307	23.2523	240.398	227.471	391.397	37.1494	259.194	213.094		26.4084	77.0045	129.596	157.029	85.8436	129.605	32.1316	345.617	86.1009	143.869
GAS1-N40GS	FFYSNN[19.1212]GSQFYIR	1212	2	18.2688	186.076	6	b	1	118.352	244.205				70.9714	67.5342			117.578				123.74	99.8145	79.4061	187.034	94.0182		5.60344	126.45	94.7069	120.681	8.92376			113.132	22.7513
GAS1-N40GS	FFYSNN[19.1212]GSQFYIR	1212	2	18.2688	204.087	7	b	1			174.929	386.644	122.306		408.529			101.482	179.329		229.754				36.2794	397.019		180.519	604.988	538.44	535.847	173.03	152.27	291.505	349.142	196.496	425.19
GAS1-N40GS	FFYSNN[19.1212]GSQFYIR	1212	2	18.2688	366.139	8	b	1		127.552	81.8306	124.096	38.9593	213.131	304.134	12.7404	150.342	260.95	132.857	26.5642	178.897	45.0103	252.287	100.515	423.29	334.693	90.5052	99.1173	15.6275	220.134	220.507	42.3471	31.3472	200.765	543.665	117.59	251.696
GAS1-N40GS	FFYSNN[15.1212]GSQFYIR	1212	2	15.7546	127.039	1	b	1	320.542	2195.3			136.732	179.074	854.616	1479.02	353.836	183.885	104.948		3354.93	2667.45	1606.32			2204.39				69.3372	23.3397		529.814	1240.08	524.07	559.715
GAS1-N40GS	FFYSNN[15.1212]GSQFYIR	1212	2	15.7546	138.055	2	b	1	1907.21	1663.04			469.434	1077.62	2303.91	1037.47	740.055	481.774	221.958		2554.84	3669.29	1844.25			2881.73				196.047						447.082
GAS1-N40GS	FFYSNN[15.1212]GSQFYIR	1212	2	15.7546	145.049	3	b	1	465.541	3530.6			902.831	1800.23	2339.22	2065.51	325.848	117.7	125.344		5215.82	3715.24	2064.41			4475.82							1042.34
GAS1-N40GS	FFYSNN[15.1212]GSQFYIR	1212	2	15.7546	163.06	4	b	1	1232.24	4599.95			1608.25	4094.69	3484.85	3562.82	1359.94	417.034	319.185		6792.8	8574.38	3528.54			7034.88					106.601		1074.61	913.714		1249.02	1580.04
GAS1-N40GS	FFYSNN[15.1212]GSQFYIR	1212	2	15.7546	168.065	5	b	1	329.035	1332.1			307.98	1133.23	1080.07	1180.71	656.866	188.379	89.8293		1476.72	2088.37	1145.79			1782.91				160.677	25.5287		83.9369	333.906
GAS1-N40GS	FFYSNN[15.1212]GSQFYIR	1212	2	15.7546	186.076	6	b	1	159.579	937.015			514.876	868.281	587.609	699.126	98.6011	35.3245			2056.47	1319.26	1216.27			1701.09					243.395		401.802	457.08	871.454		151.504
GAS1-N40GS	FFYSNN[15.1212]GSQFYIR	1212	2	15.7546	204.087	7	b	1	676.376	2778.89			3739.24	492.697	2982.94	2819.97	631.768		605.56		7545.62	6210.37	3801.05			5678.47				259.015			665.886	405.308		757.942
GAS1-N40GS	FFYSNN[15.1212]GSQFYIR	1212	2	15.7546	366.139	8	b	1	596.039	643.935			946.412	852.107	631.009	2077.55	328.274	413.814	67.3543		1670.43	2161.36	1466.33			1750.39				506.563							68.0066
GAS1-N40GS	FFYSNN[17.1212]GSQFYIR	1212	2	16.5952	127.039	1	b	1	989.265		119.463	136.809	84.2753	256.135	188.64				27.972			141.131				210.834							16.2325	117.409	197.021		118.191	926.733
GAS1-N40GS	FFYSNN[17.1212]GSQFYIR	1212	2	16.5952	138.055	2	b	1		108.118		67.2968	90.5099	702.21	57.6903	441.363	531.273	855.617	132.384				19.0151		406.462	336.218		730.808	1318.18			338.81	182.323	635.17	396.874		267.311
GAS1-N40GS	FFYSNN[17.1212]GSQFYIR	1212	2	16.5952	145.049	3	b	1	990.701	177.083	2380.9		57.0024						283.294					102.167		53.04	116.706			276.965	25.5313	210.32	130.739	378.786	186.446		141.042	3781.74
GAS1-N40GS	FFYSNN[17.1212]GSQFYIR	1212	2	16.5952	163.06	4	b	1	533.546		875.203	100.417	413.11									85.9843	142.799	117.031		106.302	20.8696			247.246	42.2367	289.514		493.956				2010.9
GAS1-N40GS	FFYSNN[17.1212]GSQFYIR	1212	2	16.5952	168.065	5	b	1	78.921	75.1653			38.0298	942.973		300.591	555.53	188.519	87.9907				368.868		220.024		34.636	254.982	787.665		189.105	761.399	402.095	229.009	242.832		407.838
GAS1-N40GS	FFYSNN[17.1212]GSQFYIR	1212	2	16.5952	186.076	6	b	1	163.077			232.712	64.9001	263.528	52.5437	96.795	120.053		128.202				322.022		60.9345				157.16		13.4774	142.333	280.761	172.753	147.501
GAS1-N40GS	FFYSNN[17.1212]GSQFYIR	1212	2	16.5952	204.087	7	b	1					169.989	796.807	48.2256	781.574	487.837	192.611	784.95			126.806	127.87		296.578			504.807	1079.91		118.852	502.393		1181.7		244.439
GAS1-N40GS	FFYSNN[17.1212]GSQFYIR	1212	2	16.5952	366.139	8	b	1		274.242			170.125	542.531	333.595	632.54	990.706	549.765	185.118				100.108		687.482			546.946	480.768		44.2909	203.485	365.058	214.882	597.141	14.2626	363.196
GAS1-N40GS	FFYSNN[2.1212]GSQFYIR	1212	2	1.15739	127.039	1	b	1		23.5688	15.8704							32.6213	33.412	34.7845	67.0807	36.2541				38.1572	37.6258			33.7334		88.5304					33.7377
GAS1-N40GS	FFYSNN[2.1212]GSQFYIR	1212	2	1.15739	138.055	2	b	1	13.6323	66.9141	23.5693	37.3706	75.0649	37.5331	56.7018	4.73403			35.1693			18.9051						30.8764		36.8793			26.6615			15.9017
GAS1-N40GS	FFYSNN[2.1212]GSQFYIR	1212	2	1.15739	145.049	3	b	1	5.82465			22.4788	19.2009			31.0524	37.4885			54.2945	37.5019	34.1222	42.9661		37.5343	13.1948	74.7373	8.87631	37.5348	18.1307	66.8209				5.54006		37.5338	112.601
GAS1-N40GS	FFYSNN[2.1212]GSQFYIR	1212	2	1.15739	163.06	4	b	1	56.7035	61.2776	41.1588	26.9247		37.5325	5.82465	22.5196		29.3765			111.47		126.034	46.7772		44.8054	37.5335	37.349	37.5335	34.5499		56.601				35.0667	33.1946	22.8729
GAS1-N40GS	FFYSNN[2.1212]GSQFYIR	1212	2	1.15739	168.065	5	b	1									75.069							37.5298	37.5343		49.6371				14.8479		31.0516	8.89215	37.5295		74.2328	33.3829
GAS1-N40GS	FFYSNN[2.1212]GSQFYIR	1212	2	1.15739	186.076	6	b	1										36.3497		37.5303			33.4768	37.5348			37.5342		27.5844						72.0234
GAS1-N40GS	FFYSNN[2.1212]GSQFYIR	1212	2	1.15739	204.087	7	b	1					26.9205						36.7991										37.5334		35.6654	26.7268		80.1304	35.1839	112.409	112.389
GAS1-N40GS	FFYSNN[2.1212]GSQFYIR	1212	2	1.15739	366.139	8	b	1		36.8716			37.5327	37.5327						37.5079		12.0108	37.5337		37.5316											39.2508
GAS1-N40GS	FFYSNN[10.1212]GSQFYIR	1212	2	10.1186	127.039	1	b	1	1163.28	824.585	1839.11	679.471	3788.17	3519.01	2071.55	260.259	363.375	109.843	1755.35	467.947	4190.92	2200.28	888.875		936.055	874.762	1232.65	1594.07	491.692	7273.05	11622.7	3787.86	4218.79	635.448	674.696	14101.8	10125.5
GAS1-N40GS	FFYSNN[10.1212]GSQFYIR	1212	2	10.1186	138.055	2	b	1	1817.83	1609.63	1835.53		4745.21	7329.59	2914.61	171.862	1304.64	269.505	2372.01	640.1	7027.31	4145.22	1333.8				3043.25	3239.78	37.4538	12546.2	18374.5	4732.8	6096.44			18695.4	16051.4
GAS1-N40GS	FFYSNN[10.1212]GSQFYIR	1212	2	10.1186	145.049	3	b	1	2497.84	880.034	3356.27	1357.73	6415.9	7158.28	3686.96		1312.25	83.9783	3985.43		8448.79	4222.32	2064.5		2146.22	1618.66	3089.82	2643.23		14788	20558.2	7344.35	6382.76	928.522	1059.98	21447.3	20092.1
GAS1-N40GS	FFYSNN[10.1212]GSQFYIR	1212	2	10.1186	163.06	4	b	1	4824.2	1772.88	6184.8	1286.5	9584.19	10693	5543.87		1757.12		4629.54		11172.7	6775.5	2288.98	814.414	2998.8	1880.72	3596.57	5201.66	447.776	21707	30283.8	10879.1	12026.1	1347.94	1689.33	32700.8	29128.9
GAS1-N40GS	FFYSNN[10.1212]GSQFYIR	1212	2	10.1186	168.065	5	b	1	1962.89	706.466	1407.21		4529.38	5634.85	1632.55		858.734	19.847	1966.2	586.685	6093.75	3887.14	1114.46				1702.83	1889.35		7761.29	12876.8	4149.51	4608.28	93.8574		13502	12067.6
GAS1-N40GS	FFYSNN[10.1212]GSQFYIR	1212	2	10.1186	186.076	6	b	1	661.06	356.88	627.899		1895.88	1721.93	1195.45		413.786		1291.52	82.5165	2549.18	1793.08	856.728				1353.47	1009.32		3887.54	5582.44	2591.95	1779.7	75.6259		6316.31	5892.8
GAS1-N40GS	FFYSNN[10.1212]GSQFYIR	1212	2	10.1186	204.087	7	b	1	3518.61	1729.76	2757.48		10877.7	9124.52	3871.62		1679.02		4566.78		13784.7	7477.71	3816.73				3958.52	4519.03		20341.4	26882.8	11343.8	10044.2			30126.3	26720.1
GAS1-N40GS	FFYSNN[10.1212]GSQFYIR	1212	2	10.1186	366.139	8	b	1	1467.68	289.474	662.934		3758.97	3870.47	2975.13		817.715		1917.86		5729.36	2936.05	1041.64	413.632			2501.6	2039.47	20.169	7077.72	11078.7	3026.01	3096.95			12118	8902.56
GAS1-N40GS	FFYSNN[11.1212]GSQFYIR	1212	2		127.039	1	b	1															497.953					826.776			322.682	2266.12		10370.8	6923.72	7815.62
GAS1-N40GS	FFYSNN[11.1212]GSQFYIR	1212	2		138.055	2	b	1															507.24					1485.63			1863.39	2883.99		14960.9	9294.79	10631.8
GAS1-N40GS	FFYSNN[11.1212]GSQFYIR	1212	2		145.049	3	b	1															1052.46					1572.91			555.995	4809.42	4218.74	19290.4	12763.8	13090.8
GAS1-N40GS	FFYSNN[11.1212]GSQFYIR	1212	2		163.06	4	b	1										276.128					1573.6					2056.47			1050.57	6486.52		26276.8	16170.3	19419.2
GAS1-N40GS	FFYSNN[11.1212]GSQFYIR	1212	2		168.065	5	b	1										528.987					644.513					573.921			1291.2	2314.58		9501.64	6649.61	7534.05
GAS1-N40GS	FFYSNN[11.1212]GSQFYIR	1212	2		186.076	6	b	1										55.7616					443.326					467.918				1516.24	1295.93	5365.47	3498.72	3743.23
GAS1-N40GS	FFYSNN[11.1212]GSQFYIR	1212	2		204.087	7	b	1										602.059					1938.19					2364.41			2075.5	6063.5		24168.1	16728	16266.7
GAS1-N40GS	FFYSNN[11.1212]GSQFYIR	1212	2		366.139	8	b	1										638.053					525.313					714.967			831.376	1885.41	1897.42	9972.76	6729.27	6626.56
GAS1-N40GS	FFYSNN[1.1212]GSQFYIR	1212	2	0.6135	127.039	1	b	1			35.183			28.2271				72.3411		20.4512	63.4422	37.5314	35.3186		37.3713	29.9738	37.3881			33.9616		78.4975	37.534	37.3291		36.7516
GAS1-N40GS	FFYSNN[1.1212]GSQFYIR	1212	2	0.6135	138.055	2	b	1	67.4185	37.3714		23.5695	37.5312		71.831	88.2882	11.6493		42.3781		33.0263	46.0744	120.378						37.5323	37.5415						15.8425		37.535
GAS1-N40GS	FFYSNN[1.1212]GSQFYIR	1212	2	0.6135	145.049	3	b	1	37.5164	37.5299		37.2512					23.5673	28.8729		53.4956		26.4176			36.8721	11.4955	36.6472			18.8967	75.0638					31.1244
GAS1-N40GS	FFYSNN[1.1212]GSQFYIR	1212	2	0.6135	163.06	4	b	1			14.1454		37.5349		39.2549	33.0367			31.0519				74.7365			39.034		37.4558		36.2358		74.1164	61.9208	37.5351			9.15356
GAS1-N40GS	FFYSNN[1.1212]GSQFYIR	1212	2	0.6135	168.065	5	b	1				125.254		37.51							37.5352			37.5338	36.8721						14.9029				37.5338		32.1752	75.4401
GAS1-N40GS	FFYSNN[1.1212]GSQFYIR	1212	2	0.6135	186.076	6	b	1		37.5345							14.0755			37.4717	37.5294		37.4841				37.5087		70.7304				37.5305		37.5336
GAS1-N40GS	FFYSNN[1.1212]GSQFYIR	1212	2	0.6135	204.087	7	b	1	37.883			29.0126		37.531	78.5481	19.2664		27.4862	83.6621					37.5346				35.082	73.8405		27.5014	26.7254					59.5138
GAS1-N40GS	FFYSNN[1.1212]GSQFYIR	1212	2	0.6135	366.139	8	b	1			37.3889									37.5305		30.2299			37.5104			37.5338
GAS1-N40GS	FFYSNN[22.1212]GSQFYIR	1212	2	22.1657	127.039	1	b	1	101.61	101.546	34.5982	28.1154						18.0173	74.2461	29.2658	26.8792	174.002	24.2617		105.898			114.873	52.9152				12.4	23.5588	34.5456		66.8755	223.599
GAS1-N40GS	FFYSNN[22.1212]GSQFYIR	1212	2	22.1657	138.055	2	b	1	125.852	77.8101	44.0031	41.121	18.7344	295.917			183.871	30.8604	88.3223	96.1279	76.0698	18.0516					127.672	108.74	76.1711	34.4075		80.7403	53.8389	49.5787	58.9033	229.779	33.2145
GAS1-N40GS	FFYSNN[22.1212]GSQFYIR	1212	2	22.1657	145.049	3	b	1	44.7764	183.992	42.5604	35.959	119.244	185.694	74.2333	23.5812	64.1733	43.4321		17.0534	155.507	60.2029	85.3952	75.0397	38.2679				50.8304		36.497	76.6873	26.9204	118.19	73.5762	32.8765	31.0535	111.579
GAS1-N40GS	FFYSNN[22.1212]GSQFYIR	1212	2	22.1657	163.06	4	b	1	76.5377				6.34797	42.0728	25.02	16.5207	23.7892		106.063	30.0828	159.917		26.8521			59.3366	41.2447				26.9247	16.6627			115.78		20.3544
GAS1-N40GS	FFYSNN[22.1212]GSQFYIR	1212	2	22.1657	168.065	5	b	1	88.7912	123.369	115.913	7.54657	106.092	133.879	72.4456		110.525			108.308	26.4525	31.9767		31.9724	8.02246					36.7679	112.599	41.6498		21.4685	59.7116		12.2706
GAS1-N40GS	FFYSNN[22.1212]GSQFYIR	1212	2	22.1657	186.076	6	b	1				190.95		77.5735				64.3597	24.6047		37.3262	19.3102	72.5917	65.2861	136.113	161.332	138.228	49.6656	26.2902	165.379		17.5702		33.497	234.158	39.9849
GAS1-N40GS	FFYSNN[22.1212]GSQFYIR	1212	2	22.1657	204.087	7	b	1		129.148	24.0385	50.3487	264.93	133.306		59.0724	207.66				325.387	29.3395	186.871	23.2038	132.192		50.3839		188.693		12.6998	28.3158	33.4582	12.2438	104.875	15.3933		76.1765
GAS1-N40GS	FFYSNN[22.1212]GSQFYIR	1212	2	22.1657	366.139	8	b	1	219.061	452.876	121.496	63.1711	45.0168	76.6812					66.5587	137.725	34.8916	62.7286			26.7347	118.369		50.1829	14.5149	116.756	74.5201	12.2386		35.0724	92.9458	41.5913
GAS1-N40GS	FFYSNN[8.1212]GSQFYIR	1212	2	8.10846	127.039	1	b	1	424.04	610.551		1218.45	753.312	4488.15	550.366	807.298			174.026	863.663		119.682			248.124	387.282	1180.47			975.219		407.988	1145.43	232.907	1290.13	447.737	168.648	12428.7
GAS1-N40GS	FFYSNN[8.1212]GSQFYIR	1212	2	8.10846	138.055	2	b	1	689.436	364.135	365.498		75.1582		571.797		190.816	812.66	495.811	1290.47	705.689	623.859	86.0134	953.65	588.005	452.35	234.113	197.679	23.3408		802.561	422.473	140.23	782.847		2072.49	1001.97	12293.2
GAS1-N40GS	FFYSNN[8.1212]GSQFYIR	1212	2	8.10846	145.049	3	b	1	1549.82	1988.82		1385.58		5580.82		1555.37	216.704	834.635	238.967	2510.51	1016.28		432.005				991.296	615.91		1800.78	1124.64		351.796	544.134	1257.77	741.879	982.675	20250.2
GAS1-N40GS	FFYSNN[8.1212]GSQFYIR	1212	2	8.10846	163.06	4	b	1	1225.7	176.661		1328.34	349.066	3056.62	335.099	1284.58	545.239	641.974	1035.52	1392.59	877.427	616.08			839.101	446.18	2330.06	830.333		1175.87	962.278	504.72	236.623	1183.43	678.869	1960.6	1160.36	26230.4
GAS1-N40GS	FFYSNN[8.1212]GSQFYIR	1212	2	8.10846	168.065	5	b	1	666.998	249.901	598.509		131.44		353.561	97.5002	38.1253	549.08	304.869	555.06	263.647		237.654	292.761	428.198	85.2362	435.709	189.141			206.891	408.876		293.139		911.772	587.273	10060.5
GAS1-N40GS	FFYSNN[8.1212]GSQFYIR	1212	2	8.10846	186.076	6	b	1	401.391	34.8762	470.096	119.633			140.649	69.1319	109.986	607.634	164.702	392.345	537.34	120.267		254.533	292.778	38.0554	135.078	54.5665			224.161	66.2452	127.823		127.893	262.476	369.304	4136.86
GAS1-N40GS	FFYSNN[8.1212]GSQFYIR	1212	2	8.10846	204.087	7	b	1	936.542	688.105	1253.52	157.274	73.7299		1047.14	306.275	279.689	1813.27	1113.42	1183.36	1229.95	554.103	190.997	739.801	798.981	843.907	447.687	610.605			688.837	609.444		846.008	136.129	1684.47	1878.27	21763.3
GAS1-N40GS	FFYSNN[8.1212]GSQFYIR	1212	2	8.10846	366.139	8	b	1	720.625	60.9296	429.111	132.918			365.28			318.296	208.376	484.047	378.645	486.975	36.3454	488.755	319.538	175.298	218.264	173.07	192.562		575.137	216.083	49.1813			856.014	643.932	9479.7
GAS1-N40GS	FFYSNN[28.1212]GSQFYIR	1212	2	27.1494	127.039	1	b	1	10.2342				105.571	31.0538
GAS1-N40GS	FFYSNN[28.1212]GSQFYIR	1212	2	27.1494	138.055	2	b	1				35.1839		13.619	36.3489											37.5092
GAS1-N40GS	FFYSNN[28.1212]GSQFYIR	1212	2	27.1494	145.049	3	b	1				31.0528					36.8702								37.5083
GAS1-N40GS	FFYSNN[28.1212]GSQFYIR	1212	2	27.1494	163.06	4	b	1					24.8422	35.1848							37.5333					37.5092								20.194				37.371
GAS1-N40GS	FFYSNN[28.1212]GSQFYIR	1212	2	27.1494	168.065	5	b	1					37.5345												35.1549
GAS1-N40GS	FFYSNN[28.1212]GSQFYIR	1212	2	27.1494	186.076	6	b	1							37.5327																							37.5335
GAS1-N40GS	FFYSNN[28.1212]GSQFYIR	1212	2	27.1494	204.087	7	b	1									37.5091				37.5347													31.0539				26.6577
GAS1-N40GS	FFYSNN[28.1212]GSQFYIR	1212	2	27.1494	366.139	8	b	1	5.76653
GAS1-N40GS	FFYSNN[16.1212]GSQFYIR	1212	2	15.7976	127.039	1	b	1	531.356	603.336	642.978	430.779	230.597		809.302	538.611	926.5	510.127	300.14	685.977			515.093	151.535	1276.84	69.6128	458.474	270.241	533.313	69.2634	153.146	686.404	44.0375	590.649	892.563	178.199	195.308
GAS1-N40GS	FFYSNN[16.1212]GSQFYIR	1212	2	15.7976	138.055	2	b	1	2207.15	1636.83	2031.87	830.011	452.685		907.598	961.797	1621.61	820.751	126.573	1938.36	967.69		1129.02	260.774	1958.74	2449.88	2037.53	831.973	1510.49	98.1698	359.016	1326.88			1859.37	836.571	771.066
GAS1-N40GS	FFYSNN[16.1212]GSQFYIR	1212	2	15.7976	145.049	3	b	1	655.767	950.466	464.205	1370.03	1060.3		1269.01	872.89	786.519	98.5622	310.191	839.084	778.571		218.878	561.062	949.003	1039.3	681.419	483.258	352.557	360.569	187.332	79.0844	75.156		754.719	736.702	447.268
GAS1-N40GS	FFYSNN[16.1212]GSQFYIR	1212	2	15.7976	163.06	4	b	1	2308.14	649.892	316.075	1663.24	1294.72		1529.75	704.775	2558.47	525.95	513.838	1403.21	1609.91		283.187	436.754	1532.7	795.45	1073.07	743.997	745.888	240.296	272.591	128.704	358.375		1978.7	948.506	1841.98
GAS1-N40GS	FFYSNN[16.1212]GSQFYIR	1212	2	15.7976	168.065	5	b	1	744.246	661.253	773.451	957.666	668.562		334.609	820.316	470.177	734.028	161.343	1154.6	514.633		567.761	372.183	1191.72	665.299	1029.29		318.617	314.486	146.305	564.681			2035.91	330.726	347.263
GAS1-N40GS	FFYSNN[16.1212]GSQFYIR	1212	2	15.7976	186.076	6	b	1		636.677	444.785	265.195	291.782		111.803	954.929	258.838	187.12		443.156	764.112		253.078	428.054	251.39	684.081	227.394	168.843			226.86	484.957	23.636		927.463	315.214	209.401
GAS1-N40GS	FFYSNN[16.1212]GSQFYIR	1212	2	15.7976	204.087	7	b	1	1906.25	1579.75	1891.96	897.46	3315.97		1965.08	2275.56	990.325	641.079	549.463	1670.2	1510.07		633.325	1168.32	2484.9	565.133	851.085	956.685	1261.06	407.125	478.569	827.146			3048.1	715.9	986.474
GAS1-N40GS	FFYSNN[16.1212]GSQFYIR	1212	2	15.7976	366.139	8	b	1	988.335	284.289	871.877	381.478	697.606		398.749	763.144	218.254	115.439					1934.07		298.979	118.63	1326.92	236.255	751.209	589.509		330.78		663.063	761.35		1212.32
GAS1-N40GS	FFYSNN[9.1212]GSQFYIR	1212	2		127.039	1	b	1				1163.09	569.985	1157.48		498.918		37.1718			1510.34	1139.14			1895.65				310.415	2104.17	1825.3	904.119		695.34	665.578	435.782	1438.29	11901.4
GAS1-N40GS	FFYSNN[9.1212]GSQFYIR	1212	2		138.055	2	b	1					153.177		26.5396	46.9349		232.798	32.2411				32.0158			33.1112	83.5343	106.037	34.4414							697.046		14475.4
GAS1-N40GS	FFYSNN[9.1212]GSQFYIR	1212	2		145.049	3	b	1				1341.32	1583.41	1990.34		272.753		172.423			3762.74	1434.7			2452.36					1835.85	2479.14	404.238		933.749	1671.5	641.106	1044	20975.4
GAS1-N40GS	FFYSNN[9.1212]GSQFYIR	1212	2		163.06	4	b	1				1018.83	1898.74	2053.51		164.888					3797.99	2789.98			3270.22				638.909	2951.07	3004.93	1662.89		1369.21	2006.68	954.873	1203.03	26464.4
GAS1-N40GS	FFYSNN[9.1212]GSQFYIR	1212	2		168.065	5	b	1									31.0515		96.2739					39.7277		125.673		13.3177	32.0778				99.307	84.8069		488.851		11266.2
GAS1-N40GS	FFYSNN[9.1212]GSQFYIR	1212	2		186.076	6	b	1							132.049		55.3349						36.2373										148.636	85.7524		122.531		4688.58
GAS1-N40GS	FFYSNN[9.1212]GSQFYIR	1212	2		204.087	7	b	1					184.061					39.8527						20.2628			155.799	71.7062					78.6452	56.3487		645.875	41.4379	25746.6
GAS1-N40GS	FFYSNN[9.1212]GSQFYIR	1212	2		366.139	8	b	1				51.5322				54.8314	97.6542						34.7326	65.7243			18.2892						31.4139		128.647	394.725		11167.6
GAS1-N40GS	FFYSNN[6.1212]GSQFYIR	1212	2	5.25545	127.039	1	b	1			34.7448	78.4879	27.531		48.4725	37.2118	84.0388	37.4602		99.8037		19.6066		115.846		5.04541	37.5327	32.7687	14.7043	14.0765	37.5331	36.7658				38.9002	37.095	170.784
GAS1-N40GS	FFYSNN[6.1212]GSQFYIR	1212	2	5.25545	138.055	2	b	1	103.636	37.5333	56.4086	111.68	37.9624	39.2554				75.0675	12.9929		74.6467		37.5818	112.569		24.221		36.3501			21.8989				37.508			56.1484
GAS1-N40GS	FFYSNN[6.1212]GSQFYIR	1212	2	5.25545	145.049	3	b	1	37.536		246.131	72.1156		19.9012		49.4882	53.8449	35.8598		37.1905		74.39		36.7478	35.1832		110.286	283.011	20.6471		108.148		142.65		72.0242		187.458	59.1461
GAS1-N40GS	FFYSNN[6.1212]GSQFYIR	1212	2	5.25545	163.06	4	b	1	23.3776	84.7555	150.065	14.6224		10.8888	2.19595		43.3538	137.18	117.216	34.3427		169.694	9.64313	36.8419	37.2648		75.0625		75.0682		38.3229	113.991	72.4222	28.9948		173.012	102.749
GAS1-N40GS	FFYSNN[6.1212]GSQFYIR	1212	2	5.25545	168.065	5	b	1		31.216		57.976		37.4997	112.599				74.275	12.8539	39.209			37.5278			36.3504				96.8929			37.534
GAS1-N40GS	FFYSNN[6.1212]GSQFYIR	1212	2	5.25545	186.076	6	b	1			44.3364	37.5293									37.4987				37.2667	24.9651				23.5687		37.5301					8.64165
GAS1-N40GS	FFYSNN[6.1212]GSQFYIR	1212	2	5.25545	204.087	7	b	1	35.1834	37.5333	36.8552	116.778		26.4962		77.6374	31.234	36.648		30.9545		49.2608		36.8619		45.6676			98.3607	41.1573	36.8715		67.4593	37.5329		37.5323	32.0166	70.1048
GAS1-N40GS	FFYSNN[6.1212]GSQFYIR	1212	2	5.25545	366.139	8	b	1				75.0369	37.5336									37.5341	37.535				37.5339								37.3886
GAS1-N40GS	FFYSNN[13.1212]GSQFYIR	1212	2	12.9473	127.039	1	b	1	1854	1823.17	1394.62	7972.6	21391	20254.6	2171.41	14092.8	6483.27	7365.8	4601.94	11671.4		5218.49	1310.56	2639.23	1389.91	7402.57	5208.35	4469.44	1453.05				1354.81	1141.6	1830.06	4209.17	4776.81	6070.44
GAS1-N40GS	FFYSNN[13.1212]GSQFYIR	1212	2	12.9473	138.055	2	b	1	631.899	1380.38	2375.45	20315.6	49851.1	52516.5	435.905	21291.1	14528.7	14623.8	9866.1	22351.9		18946.1	7261.7	2433.77		19272	12981.1	11596.1	1262.51	1249.58	2419.34		512.756	3746.3	1891.1	3436.01	11199.2	9810.83
GAS1-N40GS	FFYSNN[13.1212]GSQFYIR	1212	2	12.9473	145.049	3	b	1	2976.91	3949.87	5052.7	16492.6	44197.3	41653.4	2813.01	22399.9	12664.6	13505.2	10191	22451.3		15668.4	4826.61	4108.96	3847.85	16341.3	11055.7	10010	3038.84				1664.52		3159.25	5926.4	7276.62	11067
GAS1-N40GS	FFYSNN[13.1212]GSQFYIR	1212	2	12.9473	163.06	4	b	1	4915.19	6058.02	6911.32	29778.2	75784.9	77441.1	4196.61	37355.6	20979.2	23203.2	17832.3	38385		27221.8	8716.97	5917.53	7669.03	30540.1	21310.8	16336.3	6181.3				891.483	1530.88	2787.3	6932.24	16221.4	20617.6
GAS1-N40GS	FFYSNN[13.1212]GSQFYIR	1212	2	12.9473	168.065	5	b	1	818.338	829.552	1098.43	13959	30472.7	32654.8	513.056	15489.1	9865.94	10265.6	6423.44	15398.4		14307.8	5664.56	912.695	686.591	12734.3	8763.51	7778.52	508.499	964.697	537.57		449.789	1586.26	770.179	1672.69	6369.53	4997.97
GAS1-N40GS	FFYSNN[13.1212]GSQFYIR	1212	2	12.9473	186.076	6	b	1	250.15	862.096	530.51	8421.1	17125.5	16702.9	702.126	8302	4647.77	5099.77	3481.6	7270.34		6912.01	2864.38	192.267	781.979	7471.36	4608.6	4539.08	402.05	782.752	848.145		242.029	1274.94	687.417	648.255	3177.77	3007.73
GAS1-N40GS	FFYSNN[13.1212]GSQFYIR	1212	2	12.9473	204.087	7	b	1	3116.04	3605.33	4353.36	42262.8	99476.1	99375.5	2074.28	42873.8	28381.8	28115.1	21731.9	44330.1		37834.8	15511	1722.39	2827.49	37690.7	24755.9	20305.9	3018.37	3033.23	3517.5		753.885	5829.48	1268.13	6784.29	15767.1	17381.8
GAS1-N40GS	FFYSNN[13.1212]GSQFYIR	1212	2	12.9473	366.139	8	b	1	1021.38	1284.63	1795.85	15010.3	33706.9	35800.6	720.272	14283.7	10085.8	10173.4	7309.92	16976.6		13811.4	5692.79	1781.45	1813.22	14273	9491.21	7358.67	1053.39	967.398	1566.01			2277.99	686.483	1604.91	5284.73	4063.87
GAS1-N40GS	FFYSNN[7.1212]GSQFYIR	1212	2	7.65585	127.039	1	b	1	938.2	1798.83	9796.79	719.37			739.732	1340.73	967.308	201.122	1908.44		2235.13		478.967	1903.57	778.227	907.669	479.937	2059.65		980.552	4436.48	1664.76	292.891	701.533	911.425	2010.79	854.3	848.631
GAS1-N40GS	FFYSNN[7.1212]GSQFYIR	1212	2	7.65585	138.055	2	b	1	78.9113					118.877	48.3518				422.306	126.633	296.07				41.1973		48.9815		25.9801					36.3182
GAS1-N40GS	FFYSNN[7.1212]GSQFYIR	1212	2	7.65585	145.049	3	b	1		1866.84	12403.2	1477.38	2356.47		1100.25	1612	1671.8	786.254	2532.01		3845.75	1293.76	319.567	1863.88	983.487	772.025	1151.84	1053.85		844.243	2644.27	2175.07	1142.45	1063.79	179.16	2292.3	925.64	945.861
GAS1-N40GS	FFYSNN[7.1212]GSQFYIR	1212	2	7.65585	163.06	4	b	1	648.896	2410.89	13611.6	1320.7		1680.18	1212.54	2413.31	1123.78	725.676	1718.83		2675.34		390.575	1766.57	725.318	661.497	441.461	681.393		1369.84	1751.5	985.172	583.835	616.111	660.391	2315.77	1008.23
GAS1-N40GS	FFYSNN[7.1212]GSQFYIR	1212	2	7.65585	168.065	5	b	1	116.143	163.879										85.545				235.978	43.9832	32.2212		115.616	5.79351				44.6399	131.278		140.67	106.707
GAS1-N40GS	FFYSNN[7.1212]GSQFYIR	1212	2	7.65585	186.076	6	b	1		182.744		75.157				109.955			128.957				29.6752	156.249		183.191		120.773	37.3881				108.169	114.42
GAS1-N40GS	FFYSNN[7.1212]GSQFYIR	1212	2	7.65585	204.087	7	b	1	468.506	314.033		136.764	177.359	188.789	558.415	350.44	363.533		123.166		433.984	167.745		368.319		119.95		368.996	468.68					111.316	66.5972	388.78
GAS1-N40GS	FFYSNN[7.1212]GSQFYIR	1212	2	7.65585	366.139	8	b	1	144.567			105.451	397.002				69.7924					104.89	102.369				209.512		86.6677			59.2071				199.121	116.484	54.3689
GAS1-N40GS	FFYSNN[12.1212]GSQFYIR	1212	2	12.1843	127.039	1	b	1	14912.3	19212.3	21045.6	23733.3	48532.7	46812.4	17662	25553.9	12863.8	11461.6	7747.47	20595.8	21832.7	20819.1	8063.95	11967	30491.8	18366.2	12348	10343.7	16907.6	3111.49	3520.66	2113.58	1838.16	3484.33	4712.39	5894.67	9538.53	12692.1
GAS1-N40GS	FFYSNN[12.1212]GSQFYIR	1212	2	12.1843	138.055	2	b	1	26792	31136.2	34931.8	38662.9	91858.8	86556.8	31861.6	37344.2	24873.7	22813.2	18126.2	37575.5	29825.4	29777.6	14152.4	16655.4	55026.3	31428.5	20484.6	18298.7	27960.9	1378.5	2324.54	3378.34	2092.5	5007.08	8173.03	6845.93	15760.9	14928
GAS1-N40GS	FFYSNN[12.1212]GSQFYIR	1212	2	12.1843	145.049	3	b	1	30344.8	30531.6	36784.3	42599.3	99167.5	87553.5	34495.5	41009.2	27010.8	23379.7	16664.3	38573.8	38944.3	38428.5	14596.2	19814.7	61025.8	37714.4	22759.3	19783.1	32477.8	5544.86	6188.71	3918.62	2698.52	6638.06	6872.4	8952.45	18915.4	22244.5
GAS1-N40GS	FFYSNN[12.1212]GSQFYIR	1212	2	12.1843	163.06	4	b	1	49318.6	56950.4	63314.3	70732.3	155777	152402	58672.9	65100.1	42647.4	39829.6	31100.7	67684.6	63795.4	58396.7	23386.6	33060.2	97673.1	56825.2	40199	32085.5	51880.3	8517.26	8047.48	6748.74	4423.64	8584.82	8977.42	19124.2	30981.7	35539.9
GAS1-N40GS	FFYSNN[12.1212]GSQFYIR	1212	2	12.1843	168.065	5	b	1	17746	21208.4	23301.3	26273.1	57264.8	54805.8	22418.8	25925.2	17308.1	16455.8	11104.7	24949.2	19466.3	20904.6	8931.84	12286.3	38558.4	19371.8	14153	11555.4	19685.7	1225.74	1347.64	942.037	506.414	2890.44	4212.87	3887.58	9078.79	8115.67
GAS1-N40GS	FFYSNN[12.1212]GSQFYIR	1212	2	12.1843	186.076	6	b	1	10650.1	11266.1	11925.9	14978.6	30636.1	28720.7	11439.5	12789.1	8757.94	7655.61	5865.66	12805.9	10722.5	11407.8	4602.63	6977.45	18859.5	10550.2	7746.09	5988.81	9558.27	1016.19	1166.71	1052.7	1166.3	1795.78	2218.95	2904.44	5575.79	4779.11
GAS1-N40GS	FFYSNN[12.1212]GSQFYIR	1212	2	12.1843	204.087	7	b	1	52926.6	59907.7	67252.7	76990.7	183123	163734	64849.9	71689.3	49002.6	46283.7	35521.9	74747.9	69378.9	62679.6	26165.5	35273.2	104237	58714.3	41804.9	32563.8	57110.1	3080.29	3996.48	4011.36	3165.38	8299.87	8122.81	12391.5	25759.3	24914.7
GAS1-N40GS	FFYSNN[12.1212]GSQFYIR	1212	2	12.1843	366.139	8	b	1	20199.9	19985	23143.9	27130.8	61887.1	58710.9	23799.1	25402.1	17460.3	17443.1	11858.6	26871.5	24234.6	23776.4	9125.17	13456.7	36725.9	21964.9	16073	11986.4	21050.5	832.432	1620.69	1406.81	1428.11	2924.8	2740.78	4428.4	8342.75	5126.7
GAS1-N40GS	FFYSNN[20.1212]GSQFYIR	1212	2	19.9249	127.039	1	b	1	63.535			130.705	43.1524		37.9561		35.7544	18.9216		159.369	29.7596	54.5541		111.112	30.0056	36.9958		65.1051		40.8877		107.341	36.9688	37.5301		40.8017
GAS1-N40GS	FFYSNN[20.1212]GSQFYIR	1212	2	19.9249	138.055	2	b	1	291.379		50.1398	55.7219	92.3201		197.218	67.8365		16.8654	63.9832	74.2785	136.526		21.2721		58.1651	93.7973	162.686		40.4534	11.2415		309.102	204.907		48.7273	18.135
GAS1-N40GS	FFYSNN[20.1212]GSQFYIR	1212	2	19.9249	145.049	3	b	1	39.2335	36.4613	52.5727	161.771		94.6042	53.3363	45.4675		104.823		207.968	28.6238		127.626	35.8269	65.7195		37.5346		72.1346	188.789					106.835	35.0779	24.3994
GAS1-N40GS	FFYSNN[20.1212]GSQFYIR	1212	2	19.9249	163.06	4	b	1	101.008	65.4689	134.074		86.7078	127.054	127.879			89.569	79.564	34.3117	25.1509	45.6892	36.3595		94.6147		51.5059		25.322	26.6389		151.457	71.9234	45.7321	114.208		145.665
GAS1-N40GS	FFYSNN[20.1212]GSQFYIR	1212	2	19.9249	168.065	5	b	1	139.795	222.744	11.2941				50.4535	59.6073	29.3203	68.4143	71.1984	89.4219	41.5921			53.0017	26.4966	13.0672	34.7433	147.633	36.4958		36.6068		127.365	126.361	39.1818	13.3789	45.4315
GAS1-N40GS	FFYSNN[20.1212]GSQFYIR	1212	2	19.9249	186.076	6	b	1	66.0185		214.405			30.0013	124.157		86.6365	149.135		41.5864	340.091	103.909	49.9599			96.7194	36.5898	60.6083	149.318	183.337	20.7259	105.847			33.8489	59.2017	31.054
GAS1-N40GS	FFYSNN[20.1212]GSQFYIR	1212	2	19.9249	204.087	7	b	1	252.331		30.11	387.495		64.8173	84.1136			40.7532	298.299		528.888	34.9459		144.866	307.3			77.6035		8.28289	37.3638		152.236			13.4144
GAS1-N40GS	FFYSNN[20.1212]GSQFYIR	1212	2	19.9249	366.139	8	b	1	52.3772	44.7922	94.5822	573.45			81.5267		32.2494		47.714	53.2681	43.5476			143.545	101.699	54.7721		163.047	42.6583	81.0992	70.5462	123.348	26.5935	76.3735
GAS1-N40GS	FFYSNN[26.1212]GSQFYIR	1212	2	25.2593	127.039	1	b	1	26.4863	37.5341				37.5099			37.5324				37.5328				37.5339													37.5324
GAS1-N40GS	FFYSNN[26.1212]GSQFYIR	1212	2	25.2593	138.055	2	b	1				5.82509		37.5331	37.5333					37.3889	36.6844				37.534	73.2108								37.5339			37.5322	28.8408
GAS1-N40GS	FFYSNN[26.1212]GSQFYIR	1212	2	25.2593	145.049	3	b	1					36.8706		37.3709		37.2669						37.5329		37.2668	37.5324							37.5298					81.548
GAS1-N40GS	FFYSNN[26.1212]GSQFYIR	1212	2	25.2593	163.06	4	b	1	19.2734	37.5337			26.3539		26.4164					36.872		41.0178	37.5097														26.4764
GAS1-N40GS	FFYSNN[26.1212]GSQFYIR	1212	2	25.2593	168.065	5	b	1																														11.1717
GAS1-N40GS	FFYSNN[26.1212]GSQFYIR	1212	2	25.2593	186.076	6	b	1												109.559																		27.1797
GAS1-N40GS	FFYSNN[26.1212]GSQFYIR	1212	2	25.2593	204.087	7	b	1				23.5677	52.6021	41.017																			37.5084	34.4363				66.3236
GAS1-N40GS	FFYSNN[26.1212]GSQFYIR	1212	2	25.2593	366.139	8	b	1	35.1833				35.1827							35.3406		30.4164				37.3883
GAS1-N40GS	FFYSNN[29.1212]GSQFYIR	1212	2		127.039	1	b	1													23.5687
GAS1-N40GS	FFYSNN[29.1212]GSQFYIR	1212	2		138.055	2	b	1				35.1839														37.508
GAS1-N40GS	FFYSNN[29.1212]GSQFYIR	1212	2		145.049	3	b	1				31.0528													37.5071
GAS1-N40GS	FFYSNN[29.1212]GSQFYIR	1212	2		163.06	4	b	1																		37.508								20.194				23.5688
GAS1-N40GS	FFYSNN[29.1212]GSQFYIR	1212	2		168.065	5	b	1																	35.0026
GAS1-N40GS	FFYSNN[29.1212]GSQFYIR	1212	2		186.076	6	b	1																														35.1837
GAS1-N40GS	FFYSNN[29.1212]GSQFYIR	1212	2		204.087	7	b	1																										31.0539				24.3276
GAS1-N40GS	FFYSNN[29.1212]GSQFYIR	1212	2		366.139	8	b	1													23.5687
GAS1-N40GS	FFYSNN[4.1212]GSQFYIR	1212	2	3.41092	127.039	1	b	1		59.5565	37.5342	39.2545		37.2738	10.8115		86.4004			26.6678			37.5332	39.1266	38.5113			37.5326	30.982		37.5345							16.5059
GAS1-N40GS	FFYSNN[4.1212]GSQFYIR	1212	2	3.41092	138.055	2	b	1	70.7969	30.9804		34.7457	34.7444	36.827	75.0369				108.62		60.0679	34.7461	33.3118	5.82509	39.2292		35.1836	13.5816		55.6658		35.1834	31.0524		23.5133	72.1781	37.3381	37.533
GAS1-N40GS	FFYSNN[4.1212]GSQFYIR	1212	2	3.41092	145.049	3	b	1				22.7437			112.127		148.571	29.0029	36.8717			68.2269				53.7242	35.1836	26.9253	30.1645				35.147		62.1046		34.047	51.9677
GAS1-N40GS	FFYSNN[4.1212]GSQFYIR	1212	2	3.41092	163.06	4	b	1	37.388	37.5331	36.3505		36.319	34.746	37.5325	39.8027				35.1843	54.1976	37.141		14.0763	37.5304	52.8018			23.5682		37.5341	23.2961	36.5082	36.7683		56.7006
GAS1-N40GS	FFYSNN[4.1212]GSQFYIR	1212	2	3.41092	168.065	5	b	1		34.907	27.8425						71.8306	38.2068	37.5306											35.1832				36.3505
GAS1-N40GS	FFYSNN[4.1212]GSQFYIR	1212	2	3.41092	186.076	6	b	1	72.0238			37.534						29.6761			37.5287	38.4715			15.5264	36.8711
GAS1-N40GS	FFYSNN[4.1212]GSQFYIR	1212	2	3.41092	204.087	7	b	1				20.4169	23.6143	38.9453		27.812			23.5684	31.0537	37.3853			14.0763		72.2436				35.1832	37.488	36.9631			52.1056	34.652	40.5985	37.4882
GAS1-N40GS	FFYSNN[4.1212]GSQFYIR	1212	2	3.41092	366.139	8	b	1	33.4762		37.5341					37.389		37.5342					37.5332
GAS1-N40GS	FFYSNN[2.1187]GSQFYIR	1187	2	1.84442	127.039	1	b	1	37.5329	32.3633	15.6414	27.4755			37.5002										16.5053			13.0666	5.13303		39.2552	29.6757		37.5056				37.3908
GAS1-N40GS	FFYSNN[2.1187]GSQFYIR	1187	2	1.84442	138.055	2	b	1	36.3503	44.0322	31.6118	112.596	36.871						35.1832		70.5547			37.5337	37.509				30.4548		37.5274	55.8895	32.6971				65.1195
GAS1-N40GS	FFYSNN[2.1187]GSQFYIR	1187	2	1.84442	145.049	3	b	1	74.753	75.2516		18.6374						75.0665		75.0686	38.0215			36.8721				13.5979		37.5275	75.0674							62.1704
GAS1-N40GS	FFYSNN[2.1187]GSQFYIR	1187	2	1.84442	163.06	4	b	1		34.1246		37.3375			36.2444	29.6748	25.9907	37.5265		37.5342	71.8311	37.9568	35.5655		52.8669	37.3343	75.0669	21.3388		25.096					37.3695		94.5856
GAS1-N40GS	FFYSNN[2.1187]GSQFYIR	1187	2	1.84442	168.065	5	b	1		37.5337	37.533	9.80461		71.3493		37.5326			12.8713	37.5336		45.5526		36.8721					5.82499			37.3899		37.5327	24.4795	37.5305
GAS1-N40GS	FFYSNN[2.1187]GSQFYIR	1187	2	1.84442	186.076	6	b	1				33.3461		37.3886		37.5333		75.0656			37.5338		75.0663			37.528	32.9356
GAS1-N40GS	FFYSNN[2.1187]GSQFYIR	1187	2	1.84442	204.087	7	b	1		104.832			35.1832	29.9313	61.0346		28.13		31.0518	37.4884		33.0161		37.509		52.3231							37.5341				75.0632
GAS1-N40GS	FFYSNN[2.1187]GSQFYIR	1187	2	1.84442	366.139	8	b	1												34.2343		37.5339										37.5105				37.5339		37.3908
GAS1-N40GS	FFYSNN[20.1187]GSQFYIR	1187	2	20.7686	127.039	1	b	1	18.5844	31.0397		109.33		82.266	65.1257		35.2897	39.9042	38.4695	92.4924	127.64	147.194	15.4571		25.4855	32.2612	36.3502	57.091	16.579		67.2581	6.27819			34.0119	35.7936
GAS1-N40GS	FFYSNN[20.1187]GSQFYIR	1187	2	20.7686	138.055	2	b	1		12.7212	117.677	192.965	106.739	24.9315		83.9857	95.837		27.7702		25.4694			142.071	133.064			39.0086		25.1754	120.105		16.5614	249.844		93.3675
GAS1-N40GS	FFYSNN[20.1187]GSQFYIR	1187	2	20.7686	145.049	3	b	1	118.869	192.857		10.6609		89.8625			77.2542	78.7493	48.2471		102.528	43.2252	58.1488	9.94122	37.3987	83.909	39.419	24.1505	40.4016		41.9479			93.3177	33.3181	79.1845	19.4699
GAS1-N40GS	FFYSNN[20.1187]GSQFYIR	1187	2	20.7686	163.06	4	b	1					91.7558	138.679		54.1393	49.6842	150.765	15.0351										174.935		39.3233	49.8588		56.8253		66.9599
GAS1-N40GS	FFYSNN[20.1187]GSQFYIR	1187	2	20.7686	168.065	5	b	1	17.3821	85.737	85.4143		250.255					26.9242				129.85		8.92112	112.368			97.1108	43.8438	19.0362	36.2285	177.024	29.6907	102.668	133.51	48.6679
GAS1-N40GS	FFYSNN[20.1187]GSQFYIR	1187	2	20.7686	186.076	6	b	1			86.5851	372.043		110.156	93.372		25.9883		9.11518	74.8776	48.5511	159.989	142.355	40.1551	74.2312	93.599	15.8026	33.4776				52.3897	31.3943	44.0026			55.3045
GAS1-N40GS	FFYSNN[20.1187]GSQFYIR	1187	2	20.7686	204.087	7	b	1		59.4714	204.045			33.4105	23.0542	58.8196		70.113		78.1984	46.7178	29.0055	40.8779	246.235	191.499	60.8648	21.6269		154.527	171.413	43.7346	161.334	108.106	27.4004	36.6304	45.5547	50.4673
GAS1-N40GS	FFYSNN[20.1187]GSQFYIR	1187	2	20.7686	366.139	8	b	1	106.165	334.808	30.1955	287.474	176.49					42.6131		226.844		144.757	103.526	198.67	240.498		92.2409	23.0591		42.8757	31.1226	74.3796	43.5001	63.6789	75.7702	115.672	64.8025
GAS1-N40GS	FFYSNN[17.1187]GSQFYIR	1187	2	16.3187	127.039	1	b	1	1128.05			130.597	59.319			32.8436	38.841	128.067	139.751				105.172	54.0563				128.376		205.564	38.1904		204.614			114.049	227.964
GAS1-N40GS	FFYSNN[17.1187]GSQFYIR	1187	2	16.3187	138.055	2	b	1					213.371		198.502	361.032		224.439		300.981	76.829								102.806				340.802			467.114
GAS1-N40GS	FFYSNN[17.1187]GSQFYIR	1187	2	16.3187	145.049	3	b	1	281.223			56.2646	190.437			472.218	94.6187	92.6093	18.9534														132.996			218.969	97.8348
GAS1-N40GS	FFYSNN[17.1187]GSQFYIR	1187	2	16.3187	163.06	4	b	1	50.7785			80.6724	261.129		291.73	24.6153	60.3562		63.3234				34.9546	75.7817		48.7669				45.6253	258.48		281.205
GAS1-N40GS	FFYSNN[17.1187]GSQFYIR	1187	2	16.3187	168.065	5	b	1	620.626				150.159		153.376	283.807		310.526	267.455	143.069	138.716								319.492	503.929	180.121					156.173	175.008
GAS1-N40GS	FFYSNN[17.1187]GSQFYIR	1187	2	16.3187	186.076	6	b	1	28.761			54.3545	198.295			234.802		91.3469	92.3751	177.194				44.1388		59.007			166.312				49.9429			350.015
GAS1-N40GS	FFYSNN[17.1187]GSQFYIR	1187	2	16.3187	204.087	7	b	1	479.605			45.9645			168.388	64.747		254.54		366.858									403.255	538.108			712.418			265.224	27.5336
GAS1-N40GS	FFYSNN[17.1187]GSQFYIR	1187	2	16.3187	366.139	8	b	1	664.61				76.454			254.604		390.419	1064.48	384.515	147.113							86.5606	177.414		115.989		571.296			269.237
GAS1-N40GS	FFYSNN[14.1187]GSQFYIR	1187	2	14.3678	127.039	1	b	1	3224.73	4668.39	3267.07	4535.32	1648.48	2063.27	3308.2	2650.37	2217.8	4273.56	1470.31		1603.94	2133.66	2163.78	1215.49	1003	4539.8	2554.26	1924.56	3270.55		429.462		801.59	876.677	349.332	771.866	1111.54
GAS1-N40GS	FFYSNN[14.1187]GSQFYIR	1187	2	14.3678	138.055	2	b	1	3677.42	5890.29	4853.65	4595.58	1207.83	2541.18	5636.52	4514.34	3885.76	5352.97	1648.76		1515.16	1520.21	3014.5	2769.66	1250.62	6001.9	4004.1	1957.88	5234.84	1349.21	3288		1826.13	4961.57	3466.3	1300.78	2350.71
GAS1-N40GS	FFYSNN[14.1187]GSQFYIR	1187	2	14.3678	145.049	3	b	1	5823.54	9355.3	6851.91	8141.17	2937.12	4356.4	6110.63	5806.25	5310.07	6907.68	2643.96		3626.38	2849.23	4537.13	4720.73	1976.33	8074.75	6515.5	3145.66	6816.87	811.654	1091.41		615.473	2237.05	1102.15	1704.64	3504.14
GAS1-N40GS	FFYSNN[14.1187]GSQFYIR	1187	2	14.3678	163.06	4	b	1	13298.7	18361	13502.4	21147.9	5155.29	5784.91	13461.6	11638.2	10407.3	13686.8	5506.5		5611.93	5988.54	9159.16	8264.36	4080	18954.8	11926.1	7482.9	14431.9	2178.73	1420.88		1582	4747.17	1963.08	2880.77	4389.49
GAS1-N40GS	FFYSNN[14.1187]GSQFYIR	1187	2	14.3678	168.065	5	b	1	2646.42	4028.11	3945.96	3791.02	1420.72	1709.44	3947.01	2674.94	2195.64	3073.85	2029.21		1259.44	1774.84	3027.75	1849.71	729.737	4076.63	3228.94	1862.71	3533.64	798.717	1147.81		1423.62	2741.97	1775.23	1055.77	1353.23
GAS1-N40GS	FFYSNN[14.1187]GSQFYIR	1187	2	14.3678	186.076	6	b	1	1932.65	2751.83	2005.19	2475.18	575.939	840.988	1435.48	1517.2	803.897	1189.53	813.238		973.128	965.323	1280.56	1391.04	281.748	1892.93	1580.01	964.457	1584.21	141.918	1395.61		993.737	1841.65	881.767	429.096	1112.66
GAS1-N40GS	FFYSNN[14.1187]GSQFYIR	1187	2	14.3678	204.087	7	b	1	8178.26	12629.6	7754.28	13290	3132.03	4943.72	10444.8	6923.94	6501.28	7809.29	4058.11		4099.54	3545.13	6934.02	5842.14	2436.1	12405.6	8022.47	4205.69	9067.98	1062.64	1752.44		3805.24	8858.27	5457.52	1725.49	3815.56
GAS1-N40GS	FFYSNN[14.1187]GSQFYIR	1187	2	14.3678	366.139	8	b	1	4344.63	4232.79	3515.69	5507.56	1168.63	1867.69	4286.63	2748.83	2931.33	4174.15	1758.4		2457.18	1729.75	2941.35	2352.03	790.733	5254.73	3383.47	2141.19	3801.66	506.004	618.751		921.888	2140.18	1920.48	277.59	1008.72
GAS1-N40GS	FFYSNN[9.1187]GSQFYIR	1187	2	9.56096	127.039	1	b	1	49.0735	164.387	76.6175					537.413	108.738										568.746		803.749			1296.57	467.926	909.012		632.846	633.498	2399
GAS1-N40GS	FFYSNN[9.1187]GSQFYIR	1187	2	9.56096	138.055	2	b	1		40.0315	182.83		375.702		200.113		82.5168				22.0249	243.418	96.9195	104.588	249.718		145.421	142.539				183.16	87.0993		175.642	171.626		2906.7
GAS1-N40GS	FFYSNN[9.1187]GSQFYIR	1187	2	9.56096	145.049	3	b	1		788.161						741.018													164.607				1528.61	1506.56		1747.12	906.302	3074.81
GAS1-N40GS	FFYSNN[9.1187]GSQFYIR	1187	2	9.56096	163.06	4	b	1	18.5289	748.747			390.952		56.5765	302.865												65.5378	316.227				968.979	821.091	178.602	365.703	1158.33	3985.69
GAS1-N40GS	FFYSNN[9.1187]GSQFYIR	1187	2	9.56096	168.065	5	b	1		178.856			46.1362	87.6512			170.861				95.2176	163.845	28.5915					15.9008			278.5	92.2292		51.9665				1164.18
GAS1-N40GS	FFYSNN[9.1187]GSQFYIR	1187	2	9.56096	186.076	6	b	1	229.975	42.2407	4.31996		94.7922	179.88	66.3795				114.16						19.6869			109.639			38.5785	32.7743	60.7479	248.184				802.305
GAS1-N40GS	FFYSNN[9.1187]GSQFYIR	1187	2	9.56096	204.087	7	b	1					817.554			110.56						86.0995	141.242	256.047			60.6343	81.7793	63.0255			63.241			234.765		68.417	2845.72
GAS1-N40GS	FFYSNN[9.1187]GSQFYIR	1187	2	9.56096	366.139	8	b	1			184.03		171.452		63.0381		149.836		49.2049		39.6549		15.0564		242.291		102.386	105.951	23.1949		12.1111		87.8071		124.273			1515.64
GAS1-N40GS	FFYSNN[28.1187]GSQFYIR	1187	2		127.039	1	b	1													37.5334	26.9251																31.0424
GAS1-N40GS	FFYSNN[28.1187]GSQFYIR	1187	2		138.055	2	b	1			35.8122						37.3216																					10.5482
GAS1-N40GS	FFYSNN[28.1187]GSQFYIR	1187	2		145.049	3	b	1														36.8719					31.0531											29.0761
GAS1-N40GS	FFYSNN[28.1187]GSQFYIR	1187	2		163.06	4	b	1					20.9922	31.0529					23.5682				36.8736
GAS1-N40GS	FFYSNN[28.1187]GSQFYIR	1187	2		168.065	5	b	1					37.5345								8.05039		35.1851												37.5333			56.4295
GAS1-N40GS	FFYSNN[28.1187]GSQFYIR	1187	2		186.076	6	b	1											23.5682																35.038
GAS1-N40GS	FFYSNN[28.1187]GSQFYIR	1187	2		204.087	7	b	1			69.5169			80.1378			23.7049						35.1851				55.8895
GAS1-N40GS	FFYSNN[28.1187]GSQFYIR	1187	2		366.139	8	b	1																											23.2921			18.3722
GAS1-N40GS	FFYSNN[10.1187]GSQFYIR	1187	2	10.0394	127.039	1	b	1	96.4444	199.658				2055.77	206.949	742.263	503.27		802.182	190.835	455.777	307.369	1708.24	694.391	2598.62	460.368		442.538		1682.57	252.444		665.018	308.551	862.303		556.084
GAS1-N40GS	FFYSNN[10.1187]GSQFYIR	1187	2	10.0394	138.055	2	b	1		39.0629			608.15			609.476		831.425	855.786	611.385	1131.26	1925.72		1720.69		785.147		388.399		781.592	2174.54	168.484	60.3386	977.189		1631.69	396.817
GAS1-N40GS	FFYSNN[10.1187]GSQFYIR	1187	2	10.0394	145.049	3	b	1	872.094	624.232			1003.7	2220.58	173.19	939.481	127.264	822.69	1467.69	1470.92	1036.05	375.86	2409.14	582.12	2999.99			773.153		1174.67	670.091		1325.76	804.748	1536.58	931.824	150.525
GAS1-N40GS	FFYSNN[10.1187]GSQFYIR	1187	2	10.0394	163.06	4	b	1		282.215			791.14	1885.63		1640.58	1158.02	1252.94	1815.07	1461.02	872.462	496.038	2981.35	1160.46	3516.25			1281.98		1429.58	2556.22		963.136	1585.94	338.282	514.45	322.16
GAS1-N40GS	FFYSNN[10.1187]GSQFYIR	1187	2	10.0394	168.065	5	b	1	165.711	155.899			435.638		146.546	372.99		249.357	657.204	736.114	417.485	379.302		165.176		168.993		701.346		1851.66	1708.4	78.863		901.154		1454.7	178.181
GAS1-N40GS	FFYSNN[10.1187]GSQFYIR	1187	2	10.0394	186.076	6	b	1		82.63			640.391		201.924			83.6791	239.178	246.156	397.21	350.88	314.536	180.345				344.318		399.295	494.605		100.106	807.832		871.028	339.294
GAS1-N40GS	FFYSNN[10.1187]GSQFYIR	1187	2	10.0394	204.087	7	b	1					1484.96		1100.08	380.918		306.017	2773.84	1275.99	2127.34	517.899		1959.49				1278.14		1601.49	3249.4	36.4612		3264.94		2252.14	2129.7
GAS1-N40GS	FFYSNN[10.1187]GSQFYIR	1187	2	10.0394	366.139	8	b	1		87.6416			952.842			293.004		54.217	1145.84	743.914	538.369	516.488		137.251		67.3244		125.676		1578.59	385.654		103.805	556.516		1113.37	313.718
GAS1-N40GS	FFYSNN[23.1187]GSQFYIR	1187	2	22.9573	127.039	1	b	1	37.0838		36.7337	20.9653			9.0944	29.1045		15.4346	116.145		109.031	26.5031			29.8443	49.2567	70.3648	37.5336	67.8423		23.0448		8.94379				37.532
GAS1-N40GS	FFYSNN[23.1187]GSQFYIR	1187	2	22.9573	138.055	2	b	1	50.1523	57.5846	8.82398				63.8528	182.811		21.6434	182.506	36.9872			28.9938	106.391		58.273	36.6014	140.626	60.0115	19.3952	78.344		37.2944	106.102	26.4977
GAS1-N40GS	FFYSNN[23.1187]GSQFYIR	1187	2	22.9573	145.049	3	b	1			85.3856	8.29905		48.4359		68.5953	186.126	65.0541	10.233	101.418	57.1804	23.6816	34.3858	71.5584	42.3329		35.4395	73.2031	69.3809				29.2762	33.3725	18.6868	16.893	219.325
GAS1-N40GS	FFYSNN[23.1187]GSQFYIR	1187	2	22.9573	163.06	4	b	1	51.5722		116.017		30.2472	171.869				110.977					23.0039		41.4939	28.7005		33.0931	73.2627	28.8939		70.5484				36.3501	51.303	434.561
GAS1-N40GS	FFYSNN[23.1187]GSQFYIR	1187	2	22.9573	168.065	5	b	1	33.4541		28.59		35.8167	81.5669	26.3528	34.0992	74.7456	106.472	52.5093	198.502	53.789	13.7344		26.3298	36.8723						44.763	58.3405			76.927	24.0844	67.5927
GAS1-N40GS	FFYSNN[23.1187]GSQFYIR	1187	2	22.9573	186.076	6	b	1		132.336	129.67	209.81	30.9276	33.4365	37.5071	68.66		26.8106		66.9941					58.7355				22.7121	70.2064	83.793			75.068	65.6573	77.0546		57.5161
GAS1-N40GS	FFYSNN[23.1187]GSQFYIR	1187	2	22.9573	204.087	7	b	1	36.9691		145.222	79.6432	119.983		102.057	18.5749	19.3421	74.7401	105.24	102.833	227.257	84.4182	26.0035			45.2874		45.7192	29.069		148.976	86.9768		52.6395	13.1084	161.565	73.6436
GAS1-N40GS	FFYSNN[23.1187]GSQFYIR	1187	2	22.9573	366.139	8	b	1	286.465	119.779	110.677	145.353	11.4329			34.7325	58.1855		105.321		38.0937	17.7358		12.4727	20.9173	37.1438	31.0524	72.54	112.542	75.066		31.3178			109.255	16.262
GAS1-N40GS	FFYSNN[24.1187]GSQFYIR	1187	2	24.2326	127.039	1	b	1	29.292		36.9089	37.5271	29.383			28.9664	36.7255	42.2964			211.291	33.6922				122.134	20.5715	36.8714							32.6045	30.0129		123.114
GAS1-N40GS	FFYSNN[24.1187]GSQFYIR	1187	2	24.2326	138.055	2	b	1		34.3118				61.237	30.8093	161.147			75.854			146.1			100.722	37.2475		133.559	47.0897	18.2689	16.2342	11.2871	126.484		143.222	68.6683	4.88277	822.23
GAS1-N40GS	FFYSNN[24.1187]GSQFYIR	1187	2	24.2326	145.049	3	b	1	70.9928	33.0045			72.7619	34.2199		69.1992	52.0348		103.841	99.0752	87.2642	74.1989			41.4263		66.9121	34.8934	72.1766	76.6044					101.272			94.386
GAS1-N40GS	FFYSNN[24.1187]GSQFYIR	1187	2	24.2326	163.06	4	b	1		83.0622	106.493	48.6753	31.9653		140.656			75.039	19.5657				15.7635	36.8755	103.72		34.9881	33.9138	56.686	93.7174		59.7849		65.687	77.8311		37.5328	332.484
GAS1-N40GS	FFYSNN[24.1187]GSQFYIR	1187	2	24.2326	168.065	5	b	1	108.282	176.733	90.2182		34.2776	225.725	33.4034	36.8685		54.0391		36.4464	37.3083	10.6224		40.3683			71.8282		90.8686	36.3491	20.1204	53.1577		110.461	42.882	33.4772
GAS1-N40GS	FFYSNN[24.1187]GSQFYIR	1187	2	24.2326	186.076	6	b	1	174.102	119.233		51.5344	238.088	110.409		46.0893	72.8901	68.5768	25.7447		52.8892		35.1833	37.4885		74.7874			37.5339		68.1841						45.5087
GAS1-N40GS	FFYSNN[24.1187]GSQFYIR	1187	2	24.2326	204.087	7	b	1	36.3338	44.1282	79.7805	95.9973	109.149			29.2259		267.495	34.1467		29.6574	120.682				79.3171		36.4356	27.4993	73.892	18.1585	81.1799	139.684				64.6796	164.669
GAS1-N40GS	FFYSNN[24.1187]GSQFYIR	1187	2	24.2326	366.139	8	b	1	103.794	310.659	28.7358		11.3948	56.3407	225.206	23.5692	47.2565			74.6684			15.8255	26.5294	100.623	37.2649		115.908		37.531		41.8662		111.194	37.5335	28.7773		111.229
GAS1-N40GS	FFYSNN[25.1187]GSQFYIR	1187	2	25.1893	127.039	1	b	1	37.488		23.569	23.5681		9.69155	37.5299						14.0764	28.2507			25.3775	34.3074									37.5327	30.0127		67.717
GAS1-N40GS	FFYSNN[25.1187]GSQFYIR	1187	2	25.1893	138.055	2	b	1					60.0199				23.4459							37.3891		40.9991		44.0569	37.5082	16.5056			36.3349	36.3354
GAS1-N40GS	FFYSNN[25.1187]GSQFYIR	1187	2	25.1893	145.049	3	b	1	18.7238	75.0549		32.3321		14.0765	31.0509	37.5299			75.0644	41.1545	22.7271	6.40955			114.003			31.0525		21.2045		37.533		37.5331			37.5329	142.23
GAS1-N40GS	FFYSNN[25.1187]GSQFYIR	1187	2	25.1893	163.06	4	b	1		36.8705		47.1363					17.6946			25.1433			37.5272	10.7312	46.127						37.5293			40.9433	47.6333	37.3698		171.807
GAS1-N40GS	FFYSNN[25.1187]GSQFYIR	1187	2	25.1893	168.065	5	b	1		31.0532	71.5756		29.0415	31.2673	97.7899						41.1583					33.4774								21.2036	23.1142			68.0193
GAS1-N40GS	FFYSNN[25.1187]GSQFYIR	1187	2	25.1893	186.076	6	b	1		31.0532		29.1609		74.5224	35.1835		71.1609			66.9155												37.4874	26.4869		37.673			29.6577
GAS1-N40GS	FFYSNN[25.1187]GSQFYIR	1187	2	25.1893	204.087	7	b	1	36.35		70.7305				16.5059	34.7421					5.82535	10.8601					37.5332				33.1249	36.205		96.411			36.3311	40.8543
GAS1-N40GS	FFYSNN[25.1187]GSQFYIR	1187	2	25.1893	366.139	8	b	1		37.1568	63.8455	68.4254	56.4303	65.7314		112.596			37.5295	36.3943	52.5769	39.1829	15.0005				37.5332		33.4767			37.5329	64.8845
GAS1-N40GS	FFYSNN[1.1187]GSQFYIR	1187	2	0.507356	127.039	1	b	1	7.94984	19.0695			74.9035	37.5296	37.5336		23.5673	55.0313			36.8027		37.3874					70.307		37.2717		29.6744			16.4112			37.5351
GAS1-N40GS	FFYSNN[1.1187]GSQFYIR	1187	2	0.507356	138.055	2	b	1		15.0521		23.5144	37.3885	37.3579	30.1616		41.1555	37.387	37.509				23.0447			14.4711	37.5343				75.0163	75.0655	55.6869		46.0407
GAS1-N40GS	FFYSNN[1.1187]GSQFYIR	1187	2	0.507356	145.049	3	b	1	37.3982	41.201			74.2339	11.9879		172.803		23.5679	37.5347	23.5687		37.2614		37.7215	74.2349	75.0018		33.207	22.4287	37.0579			37.5337		36.8716	80.2569		38.6613
GAS1-N40GS	FFYSNN[1.1187]GSQFYIR	1187	2	0.507356	163.06	4	b	1	21.2654	41.7494		89.505	107.93	36.7184		29.5939		23.5679	37.5309		42.7294				36.8681			37.5217					79.1053		19.274	106.832	37.5183	93.2926
GAS1-N40GS	FFYSNN[1.1187]GSQFYIR	1187	2	0.507356	168.065	5	b	1		31.0529			12.5392				23.2891	37.5071		35.1821			60.3136	37.5343		37.5083		37.5325				37.5342				37.5327
GAS1-N40GS	FFYSNN[1.1187]GSQFYIR	1187	2	0.507356	186.076	6	b	1	73.0247	37.5333	37.5333					31.0527	35.1831	24.2181													37.5322
GAS1-N40GS	FFYSNN[1.1187]GSQFYIR	1187	2	0.507356	204.087	7	b	1	24.243	113.299		37.5087				37.51				23.5687		20.3974	64.9355	26.926	37.372		109.335		37.5351						34.7109	36.4686	37.5331
GAS1-N40GS	FFYSNN[1.1187]GSQFYIR	1187	2	0.507356	366.139	8	b	1			37.5338						35.1831				35.7468											37.5318						37.5346
GAS1-N40GS	FFYSNN[19.1187]GSQFYIR	1187	2	18.3645	127.039	1	b	1	24.8398	99.4262		135.725		69.6234	19.3181	102.893			57.9783	154.048		170.217	125.475	37.5106	25.1305	50.3244			67.3906			48.9184	144.553	97.3885
GAS1-N40GS	FFYSNN[19.1187]GSQFYIR	1187	2	18.3645	138.055	2	b	1	447.121	501.32	106.819	138.557					22.0332	135.441	127.372	68.2677				232.647	68.2988	238.634	103.91	173.639				217.405	29.8771			96.1279	175.217
GAS1-N40GS	FFYSNN[19.1187]GSQFYIR	1187	2	18.3645	145.049	3	b	1	142.732	45.7864		7.33887	37.3978	315.992		145.805	76.2269		12.1253				116.052	14.7893	39.3297				13.1449			59.9403		19.8542	41.0869	79.2553	110.079
GAS1-N40GS	FFYSNN[19.1187]GSQFYIR	1187	2	18.3645	163.06	4	b	1	263.764	141.865	86.9169	68.5002	106.111	157.56	112.09	53.9932	76.8365	26.5953						31.0574			87.1738	137.784		44.5354	143.5					86.7193
GAS1-N40GS	FFYSNN[19.1187]GSQFYIR	1187	2	18.3645	168.065	5	b	1	50.4345				20.7855	87.5979	37.9327				45.7099	150.302	101.689	127.451	37.1044		78.7056	69.0312	182.678		77.7316		143.312		33.8804			71.6461	138.376
GAS1-N40GS	FFYSNN[19.1187]GSQFYIR	1187	2	18.3645	186.076	6	b	1	73.0956	60.8474	91.6382	298.213	186.335			49.0887						70.1152		149.695	92.9214		5.80614	95.7566		25.3207		41.463		88.617	51.5436		46.9549
GAS1-N40GS	FFYSNN[19.1187]GSQFYIR	1187	2	18.3645	204.087	7	b	1	73.0061		17.68		130.027	630.545	36.0798	94.2774	51.3219	287.874	306.982	135.048				40.7372		164.26		173.272			23.4543	62.8662		65.877	76.9036	42.1625
GAS1-N40GS	FFYSNN[19.1187]GSQFYIR	1187	2	18.3645	366.139	8	b	1			162.144	225.682		89.4809				9.39008	131.417		66.7638	105.475	32.0363	55.7065	106.867	238.288	99.8473	54.4282		44.5443	37.0491			128.057	115.9	105.273	24.6485
GAS1-N40GS	FFYSNN[30.1187]GSQFYIR	1187	2		127.039	1	b	1
GAS1-N40GS	FFYSNN[30.1187]GSQFYIR	1187	2		138.055	2	b	1
GAS1-N40GS	FFYSNN[30.1187]GSQFYIR	1187	2		145.049	3	b	1
GAS1-N40GS	FFYSNN[30.1187]GSQFYIR	1187	2		163.06	4	b	1
GAS1-N40GS	FFYSNN[30.1187]GSQFYIR	1187	2		168.065	5	b	1
GAS1-N40GS	FFYSNN[30.1187]GSQFYIR	1187	2		186.076	6	b	1
GAS1-N40GS	FFYSNN[30.1187]GSQFYIR	1187	2		204.087	7	b	1
GAS1-N40GS	FFYSNN[30.1187]GSQFYIR	1187	2		366.139	8	b	1
GAS1-N40GS	FFYSNN[12.1187]GSQFYIR	1187	2	12.0095	127.039	1	b	1	4175.87	16712.8	5329.03	3594.94	6981.14	8511.5	4683.7	18439.5	3936.01	1772.07	6856.46	5983.74	4908.02	10894.3	3021.55	3135.35	14755.6	12837.1	11864.3	7950.44	4854.76	2392.97	2944.86	709.364	732.357	2636.97	2486.72	2473.38	5132.85
GAS1-N40GS	FFYSNN[12.1187]GSQFYIR	1187	2	12.0095	138.055	2	b	1	2769.15	17692.2	5835.08	4216.39	7698.05	10347.8	5228.99	18703.9	4467	2921.78	5319.22	9444.17	4359.54	9604.94	2593.24	1479.48	14183.9	13426.2	12328	8866.66	3781.75	3452.94	1997.89	1287.63	152.165	2704.21	3492.68	2918.27	5642
GAS1-N40GS	FFYSNN[12.1187]GSQFYIR	1187	2	12.0095	145.049	3	b	1	8124.05	30165.6	8480.76	6163.18	10079.9	17839.2	6418.07	29670.4	5672.44	5871.76	13740.5	11685.8	6916.68	21566.9	5350.2	4179.61	24694.6	21287.9	19520.5	13671.2	7383.97	4140.71	4875.66	1808.66	1430.75	3916.1	5054.14	5786.89	3315.44
GAS1-N40GS	FFYSNN[12.1187]GSQFYIR	1187	2	12.0095	163.06	4	b	1	6316.16	38466.5	18530	6119.33	16988	22500.5	9166.52	40950.9	4678.57	9153.55	16593.6	14582.9	12132.8	28302.1	5712.6	5733.22	34577.4	32303.3	29680.3	19301.6	8613.72	5925.84	6237.73	3539.35	1416.64	5825.97	8853.47	5796.4	10100.9
GAS1-N40GS	FFYSNN[12.1187]GSQFYIR	1187	2	12.0095	168.065	5	b	1	4831.03	12567.6	2860.96	2548.44	4376.81	6137.76	3104.28	13707.6	2878.96	3256.31	5731.18	5445.66	2270.94	8991.7	1744.83	1648.85	10727.8	8850.95	9237.07	7128.83	2442.84	2728.94	2063	600.037	102.999	2128.78	2775.21	1911.89	2505.49
GAS1-N40GS	FFYSNN[12.1187]GSQFYIR	1187	2	12.0095	186.076	6	b	1	818.681	6322.37	1211.65	1278.04	2378.56	3501.48	229.739	5092.25	671.618	660.761	2707.18	3512.54	1714.03	4420.53	267.942	785.52	5729.95	4599.89	4593.7	3223.02	910.076	1009.01	979.995	413.169		943.526	1202.87	809.513	1628.89
GAS1-N40GS	FFYSNN[12.1187]GSQFYIR	1187	2	12.0095	204.087	7	b	1	5488.84	30078.4	11291.6	6544.32	13232.5	15126.5	8317.59	31368.4	4402.16	6923.82	9948.43	13120.9	7447.1	20033.7	1898.6	2859.12	26636.6	23433.3	18181.5	14214.9	8560.49	4401.21	4328.89	2006.95	229.399	4830.43	5216.28	5907.52	8843.87
GAS1-N40GS	FFYSNN[12.1187]GSQFYIR	1187	2	12.0095	366.139	8	b	1	1276.34	9587.03	2934.18	1674.77	4755.64	7243.16	1116.33	12918.5	1379.57	795.137	6968.7	3672.32	3206.12	9164.32	391.799		10565.7	8491.85	9113.44	6436.58	1472.42	1376.9	642.904	703.844		1511.17	2400.52	435.898	2044.55
GAS1-N40GS	FFYSNN[29.1187]GSQFYIR	1187	2		127.039	1	b	1																														31.0534
GAS1-N40GS	FFYSNN[29.1187]GSQFYIR	1187	2		138.055	2	b	1													36.872																	10.4715
GAS1-N40GS	FFYSNN[29.1187]GSQFYIR	1187	2		145.049	3	b	1											31.0536								31.0531											29.0761
GAS1-N40GS	FFYSNN[29.1187]GSQFYIR	1187	2		163.06	4	b	1					23.5676	36.8716																					35.184
GAS1-N40GS	FFYSNN[29.1187]GSQFYIR	1187	2		168.065	5	b	1																														56.4296
GAS1-N40GS	FFYSNN[29.1187]GSQFYIR	1187	2		186.076	6	b	1																											28.9882
GAS1-N40GS	FFYSNN[29.1187]GSQFYIR	1187	2		204.087	7	b	1						37.3894													55.8895
GAS1-N40GS	FFYSNN[29.1187]GSQFYIR	1187	2		366.139	8	b	1					20.9973						31.0536		56.7027														19.2706			18.3722
GAS1-N40GS	FFYSNN[21.1187]GSQFYIR	1187	2	20.8007	127.039	1	b	1	26.2477	29.4753	34.9722		68.7118		28.0514	78.5535	37.0324					69.4444	32.4597	37.3151	107.644		37.5343			34.5259	34.7445	45.5007		23.5679	34.8622	49.0654	30.3314
GAS1-N40GS	FFYSNN[21.1187]GSQFYIR	1187	2	20.8007	138.055	2	b	1			232.974			239.382	34.3515	56.8677	117.09	122.016	162.308		302.561		106.668	86.8311	28.2685	67.7864		55.1231		15.6914			8.28807
GAS1-N40GS	FFYSNN[21.1187]GSQFYIR	1187	2	20.8007	145.049	3	b	1	215.919	191.344		26.5414	60.2282	22.4165	50.2501	57.2296	67.8355		49.5006		113.009	37.022				128.146	37.9913	37.3899	23.115	74.9506		125.201		66.9439	33.4246		23.1299
GAS1-N40GS	FFYSNN[21.1187]GSQFYIR	1187	2	20.8007	163.06	4	b	1		37.7748	112.436	14.8423		122.991	161.291		92.0114	32.9877	84.9705	106.536			31.6957			59.1117	108.902	25.0822	100.382		39.8988					23.5676	112.587
GAS1-N40GS	FFYSNN[21.1187]GSQFYIR	1187	2	20.8007	168.065	5	b	1	159.387	42.8527		29.7672						6.21818		112.606			37.5335		8.03304	8.96521	73.1827			71.9248		187.471	116.335		125.901	50.4536
GAS1-N40GS	FFYSNN[21.1187]GSQFYIR	1187	2	20.8007	186.076	6	b	1		190.679	204.8	357.995		35.1551		216.913	34.5408	17.5759	68.9263	88.2146	24.9827			53.85		33.655	75.0488		135.675	32.3727	21.4513		23.0456				24.5086
GAS1-N40GS	FFYSNN[21.1187]GSQFYIR	1187	2	20.8007	204.087	7	b	1	54.9378		78.0865	96.5585	32.7431	142.778	13.0107	26.36		78.7092	28.2731	162.77		118.537	21.8641		61.9036	33.9539		36.3359	114.941			122.384	36.3446	49.3113	45.5285	60.1029
GAS1-N40GS	FFYSNN[21.1187]GSQFYIR	1187	2	20.8007	366.139	8	b	1	122.734	166.248	396.85			26.731		108.645				180.265	88.1166	35.7218		97.8103	36.2462	22.9285	123.752				112.418		56.3919		49.8109		110.627
GAS1-N40GS	FFYSNN[26.1187]GSQFYIR	1187	2	25.1777	127.039	1	b	1	23.5677					103.267	44.8692								38.2021					25.031										73.5171
GAS1-N40GS	FFYSNN[26.1187]GSQFYIR	1187	2	25.1777	138.055	2	b	1				37.5336								37.5347															37.531
GAS1-N40GS	FFYSNN[26.1187]GSQFYIR	1187	2	25.1777	145.049	3	b	1		36.871			37.3885	24.2887		35.1834		37.5322								37.5329						23.5684			37.5312	36.8294	37.5287	173.806
GAS1-N40GS	FFYSNN[26.1187]GSQFYIR	1187	2	25.1777	163.06	4	b	1		35.1842			37.5059				37.1774				35.1838																	175.353
GAS1-N40GS	FFYSNN[26.1187]GSQFYIR	1187	2	25.1777	168.065	5	b	1					37.53	36.871	37.5346	32.9203						37.7272			36.8716	33.4783												67.4629
GAS1-N40GS	FFYSNN[26.1187]GSQFYIR	1187	2	25.1777	186.076	6	b	1			21.7391	37.5336		26.6677						75.0823			75.0652									35.1829						37.388
GAS1-N40GS	FFYSNN[26.1187]GSQFYIR	1187	2	25.1777	204.087	7	b	1	14.0755		36.3503					37.3895	37.3877					33.4769			37.3887			32.3325				29.0824				37.5371		52.5394
GAS1-N40GS	FFYSNN[26.1187]GSQFYIR	1187	2	25.1777	366.139	8	b	1										36.7677			31.053																37.5274
GAS1-N40GS	FFYSNN[4.1187]GSQFYIR	1187	2	4.63589	127.039	1	b	1			35.1832	70.0535	37.5336	33.4774	28.7733		10.2188		34.4526		35.3351					75.0056				37.5344	37.5337	36.8713			10.9128	36.7446	13.247
GAS1-N40GS	FFYSNN[4.1187]GSQFYIR	1187	2	4.63589	138.055	2	b	1		40.2635	12.9957			74.2793						22.096	51.2128				36.767			73.3437	33.3057	33.4792				37.5305
GAS1-N40GS	FFYSNN[4.1187]GSQFYIR	1187	2	4.63589	145.049	3	b	1	33.4395	53.4352	23.5559			71.2572	37.3896	36.8705	112.601		75.0658		37.1403				31.9764						72.3143		45.5134		13.4265	14.0759	35.0951
GAS1-N40GS	FFYSNN[4.1187]GSQFYIR	1187	2	4.63589	163.06	4	b	1	37.389			54.9384		60.5419	10.1826	36.8707		36.7675	37.533	59.0071		37.2677	87.6323	57.8877			114.248	36.7673				31.7935	13.6952	32.9366			4.34088
GAS1-N40GS	FFYSNN[4.1187]GSQFYIR	1187	2	4.63589	168.065	5	b	1	36.8719	71.9239			29.4191		35.1838									37.5344		37.5346	21.1717						35.1846					36.9136
GAS1-N40GS	FFYSNN[4.1187]GSQFYIR	1187	2	4.63589	186.076	6	b	1		35.183									34.4741			37.5342	5.8953						32.3569			36.8713			37.5313
GAS1-N40GS	FFYSNN[4.1187]GSQFYIR	1187	2	4.63589	204.087	7	b	1		37.3883	56.7011	49.3445	74.1975	74.8918	66.376		37.5326	37.2424		37.413		64.3978			18.6873	37.5348	41.7257			65.088			42.3797			5.81321
GAS1-N40GS	FFYSNN[4.1187]GSQFYIR	1187	2	4.63589	366.139	8	b	1								35.183						39.2264																37.5331
GAS1-N40GS	FFYSNN[3.1187]GSQFYIR	1187	2	3.54935	127.039	1	b	1	7.63707	29.6312	38.0402	33.4774		36.3504	48.1774						43.932	33.4773	37.5317		37.5337				15.8505	33.7038				37.5334	10.9189
GAS1-N40GS	FFYSNN[3.1187]GSQFYIR	1187	2	3.54935	138.055	2	b	1	37.5316			49.4887	37.5332	74.8942					37.5331	21.2768		39.3605		75.0701	37.5331	34.2104	19.1705	13.5817	74.9495				13.6411				65.1042
GAS1-N40GS	FFYSNN[3.1187]GSQFYIR	1187	2	3.54935	145.049	3	b	1		37.534	37.1332			133.835		36.7671					29.5518													112.601	32.5917	37.5331	35.8125
GAS1-N40GS	FFYSNN[3.1187]GSQFYIR	1187	2	3.54935	163.06	4	b	1	7.71034	39.424	75.0671			60.809	148.174	37.5328		37.5336		57.5262	37.2694	30.435	16.2344	33.3102	53.1323			71.0713		21.8709		37.4965	99.455
GAS1-N40GS	FFYSNN[3.1187]GSQFYIR	1187	2	3.54935	168.065	5	b	1				3.23588					37.3884		13.0914							37.5344			37.5331		18.2642	37.532					37.5347
GAS1-N40GS	FFYSNN[3.1187]GSQFYIR	1187	2	3.54935	186.076	6	b	1		37.5343		33.9112															37.5225								37.51
GAS1-N40GS	FFYSNN[3.1187]GSQFYIR	1187	2	3.54935	204.087	7	b	1		47.0958			37.5296	75.5328			37.3884	38.8889	37.5327	37.2674	37.3436	29.932	34.0479			34.5387					37.533		75.0155			31.1698
GAS1-N40GS	FFYSNN[3.1187]GSQFYIR	1187	2	3.54935	366.139	8	b	1			37.3704			37.3514		37.5329
GAS1-N40GS	FFYSNN[27.1187]GSQFYIR	1187	2		127.039	1	b	1							5.83485						35.1836	26.3543																110.941
GAS1-N40GS	FFYSNN[27.1187]GSQFYIR	1187	2		138.055	2	b	1									37.3427							75.0744											37.5312			52.8969
GAS1-N40GS	FFYSNN[27.1187]GSQFYIR	1187	2		145.049	3	b	1					37.5331			37.5333						37.5341													37.5312		31.0484	28.8961
GAS1-N40GS	FFYSNN[27.1187]GSQFYIR	1187	2		163.06	4	b	1						37.5337		38.4765			37.5335				37.7418			94.5824												41.8651
GAS1-N40GS	FFYSNN[27.1187]GSQFYIR	1187	2		168.065	5	b	1					37.53		23.5702						7.90837		37.535
GAS1-N40GS	FFYSNN[27.1187]GSQFYIR	1187	2		186.076	6	b	1		14.8639									37.5335					18.7345														38.4341
GAS1-N40GS	FFYSNN[27.1187]GSQFYIR	1187	2		204.087	7	b	1				37.5317		88.3691		37.5341	23.8483	37.5342					37.535			50.746						22.4354
GAS1-N40GS	FFYSNN[27.1187]GSQFYIR	1187	2		366.139	8	b	1		37.5331		37.5323						8.09179														37.5337					35.1777
GAS1-N40GS	FFYSNN[15.1187]GSQFYIR	1187	2	14.3665	127.039	1	b	1	3768.45	4047.6	3239.91	5165.77	7999.53	7618.96	3942.82	3040.43	3120.84	3414.57	1619.84	5599.93	7505.22		2653.65		6542.67	4660.31	3397.77	2042.07	3688.04	515.545	787.173		111.205		714.161	932.338	1945.34
GAS1-N40GS	FFYSNN[15.1187]GSQFYIR	1187	2	14.3665	138.055	2	b	1	5198.86	6450.14	5100.52	5558.17	10470	13133.7	6850.87	4110.54	4322.39	5568.11	2648.91	8398.14	8802.32		3263.36		11704.1	6920.89	4497.48	2713.66	5472.82	1243.83	1272.95		319.983		2320.15	1836.4	3208.61
GAS1-N40GS	FFYSNN[15.1187]GSQFYIR	1187	2	14.3665	145.049	3	b	1	6576.3	10074.1	7198.56	8664.71	15514.3	17259.2	6664.54	6558.48	5053.53	7175.99	3807.52	12287	15211.9		5546.9		16792.4	9450.54	6702.75	3557.66	7352.56	892.878	650.38		873.247		2132.21	1962.01	3794.02
GAS1-N40GS	FFYSNN[15.1187]GSQFYIR	1187	2	14.3665	163.06	4	b	1	12566.7	17966.6	14688.7	22631.3	33207.9	37288.6	15613.7	12468.2	11559.9	14339.3	6099.92	27365.2	36490		10541.7		33788	18814.9	13935.1	8366.8	16029.6	2941.29	2282.18		486.174		3072.1	2988.43	6004.11
GAS1-N40GS	FFYSNN[15.1187]GSQFYIR	1187	2	14.3665	168.065	5	b	1	2829.44	4115.25	4713.92	4422.06	7661.3	8360.29	4030.78	3300.89	2238.68	2302.07	2209.16	6471.39	7521.27		2801.77		8744.67	4156.04	3598.3	1904.22	3445.63	1000.07	1268.18		747.723		1554.24	1036.39	1694.77
GAS1-N40GS	FFYSNN[15.1187]GSQFYIR	1187	2	14.3665	186.076	6	b	1	1470.73	2752.18	2260.26	2628.21	3996.38	5373.62	1326.92	1508.06	1610.09	1356.96	557.023	3088.95	3902.76		996.611		3310.66	2565.67	2055.82	839.24	2383.38	125.573	268.398		280.105		1227.49	655.849	1074.44
GAS1-N40GS	FFYSNN[15.1187]GSQFYIR	1187	2	14.3665	204.087	7	b	1	8112.36	13296.2	8435.38	14258.4	24600.7	25540.3	10937.6	8454.97	7293.69	7902.81	4330	16283.9	25067.7		7165.32		24455.1	12545.4	8935.12	5095.55	8828.37	1113.66	548.325		169.173		3267.39	1604.09	4363.75
GAS1-N40GS	FFYSNN[15.1187]GSQFYIR	1187	2	14.3665	366.139	8	b	1	5385.61	4605.62	3848.51	5778.75	7848.59	9329.34	4419.37	3131.45	3191.79	4078.54	2602.64	6840.75	9723.89		4601.65		6553.55	6107.4	3768.21	1904.08	4300.01	579.684	119.431		541.373		924.212	528.671	1066.12
GAS1-N40GS	FFYSNN[7.1187]GSQFYIR	1187	2	7.53767	127.039	1	b	1	5618.35	1035.31		1441.02	2196.05	3404.77	2841.51	3589.59	881.826	1725.13	2079.25	1964.81	2059.5	4170.79		1659.66		2998.05	1291.84	846.239		1309.63	1976.14	1196.34	556.922		779.666	1095.98	1514.61	5393.18
GAS1-N40GS	FFYSNN[7.1187]GSQFYIR	1187	2	7.53767	138.055	2	b	1	2087.77	528.542	1985.62		675.724		823.525	1238.91		784.356	1128.47	816.679		1377.92	283.724	372.224		682.714	602.524	465.928	34.2812			79.5719	312.781		88.8149	587.088	40.3691	651.643
GAS1-N40GS	FFYSNN[7.1187]GSQFYIR	1187	2	7.53767	145.049	3	b	1	3460.93	825.05		1272.64	3669.24	4108.26	2923.57	4210.78	1166.25	4790.07	2806.53	2435.93	2250.82	4842.95		2169.39		1946	901.256	2670.13	26.9603	1497.16	1994.17	1666.87	1015.08		1678.01	1747.03	777.939	3168.37
GAS1-N40GS	FFYSNN[7.1187]GSQFYIR	1187	2	7.53767	163.06	4	b	1	6584.03	4580.64		1601.52	3974.46	3545.14	3003.99	3757.2	1620.11	2534.53	3687	2711.16	2463.31	5144.26				1458.55	4180.32	1889.15		1041.31	786.944	1865.61	212.823		720.303	679.246		6866.26
GAS1-N40GS	FFYSNN[7.1187]GSQFYIR	1187	2	7.53767	168.065	5	b	1	859.104	985.411	821.422		486.229		701.549	966.958	721.453	433.201	648.898			995.182		668.016		472.056	363.27	245.338		55.0533	90.2414				128.651	117.169		1055.13
GAS1-N40GS	FFYSNN[7.1187]GSQFYIR	1187	2	7.53767	186.076	6	b	1	1052.59	776.845	755.1		181.982			525.743		673.832		296.697		137.721	78.3176	153.322		355.301		216.332					43.3391		264.483	256.435	144.086	556.237
GAS1-N40GS	FFYSNN[7.1187]GSQFYIR	1187	2	7.53767	204.087	7	b	1	3146.89	2136.34	2754.35	64.1437	2039.83		1723.84	1743.28		1459.04		1302.65		2041.34		257.519	32.521	1172.64	1312.33	755.653	31.0512	59.7417		182.076	110.303		409.622	779.843	55.338	958.886
GAS1-N40GS	FFYSNN[7.1187]GSQFYIR	1187	2	7.53767	366.139	8	b	1	1182.47	678.132	1403.19		1013.18		676.181	1162.5		662.109		507.203		637.118	38.0914	456.322	32.1573	357.778	677.615	258.073				111.376	100.012		109.782	400.731		645.639
GAS1-N40GS	FFYSNN[11.1187]GSQFYIR	1187	2	10.525	127.039	1	b	1	390.723	15205.4	18509.9	2926	5856.25	7305.88	14680.9	15965	9449.68		902.149		13447.9	9616.78	5967.9	563.035		10648.1	10841.8	409.167	7039.47	1871.53	1665.97	1263.99	827.122	273.215	2482.85	1987.39		2651.08
GAS1-N40GS	FFYSNN[11.1187]GSQFYIR	1187	2	10.525	138.055	2	b	1	304.258	16539.5	18958.6	3229.03	7734.57	10124.3	18159	17344.2	11681	590.878	887.506	673.794	15550.3	9456.83	6946.72	764.681	337.347	11396.6	12228.2		6019.7	3008.46	2322.58	2588.59	340.343	754.561	3354.13	2091.22	145.447	2655.5
GAS1-N40GS	FFYSNN[11.1187]GSQFYIR	1187	2	10.525	145.049	3	b	1	683.434	27382.6	32512.7	6287.99	12659.8	15516.8	27945.4	27799.5	17113.1	589.299	1261.39	1023.22	27201.2	19204.6	10424.3	662.422	955.244	18336.7	17140.5	864.299	10215.6	3664.86	3798.66	2410.57	1134.55	900.342	4805.11	4749.44		5454.73
GAS1-N40GS	FFYSNN[11.1187]GSQFYIR	1187	2	10.525	163.06	4	b	1	1256	38322.7	48319.7	8160.54	19995.9	20243.1	43664.5	41447.3	24785.2	1110.97	1922.54	805.27	37619.9	25108	16381.2	1124.77	1623.02	27534.3	27143.9	917.089	17116	5417.75	4959.2	3921.52	2548.98	809.981	8563.48	7822.24		9688.15
GAS1-N40GS	FFYSNN[11.1187]GSQFYIR	1187	2	10.525	168.065	5	b	1		11617.8	15661.1	2032.13	7377.59	6224.94	13446.3	12148.8	7581.37	262.825	635.509	709.624	10023.4	8938.69	4410.43	166.61		7926.28	8604.02	471.613	5129.21	2618.56	1998.54	672.189	85.8075	745.882	2565.59	1666.3	270.696	2315.45
GAS1-N40GS	FFYSNN[11.1187]GSQFYIR	1187	2	10.525	186.076	6	b	1		6130.65	5367.56	1089.76	2682.54	2638.86	5953.91	5531.16	5232.17	86.3822	298.358	244.489	4946.9	3381.07	3125.81	107.187	97.8461	4023.5	3825.78	260.163	1945.08	1099.24	801.332	204.655	322.139	734.826	1032.04	897.655	34.6089	1029.46
GAS1-N40GS	FFYSNN[11.1187]GSQFYIR	1187	2	10.525	204.087	7	b	1		29908.3	35594.2	8023.73	16090.6	15043.4	31717.2	29665.5	18538.1		2044.13	1045.97	31255.5	20263.9	13051.5	861.79		23304.2	18158.6	840.716	12498.9	4217.99	4086.84	3300.8	1247.28	2140.88	5038.88	3293.83		5096.28
GAS1-N40GS	FFYSNN[11.1187]GSQFYIR	1187	2	10.525	366.139	8	b	1		10868	14065.6	2286.86	6465.9	7659.17	12235.1	12944	8370.78		776.188	536.705	14043.8	9264.86	4832.31	161.215		8393.57	8805.26	129.87	5455.5	1254.77	682.641	992.087	99.8748	260.908	1993.72	2150.16		2026.78
GAS1-N40GS	FFYSNN[5.1187]GSQFYIR	1187	2	5.58902	127.039	1	b	1	137.162			37.5339		27.6446	90.9717	74.7406			75.0381		31.3228	74.8813	92.6627	5.27347	124.55		74.6678	74.6282							37.5082	74.2969		37.5649
GAS1-N40GS	FFYSNN[5.1187]GSQFYIR	1187	2	5.58902	138.055	2	b	1	73.6615	44.0288	115.684				112.6	38.9731		50.9006		37.5329	37.5332		98.2493	37.3858			37.7731	37.3606				55.9697
GAS1-N40GS	FFYSNN[5.1187]GSQFYIR	1187	2	5.58902	145.049	3	b	1	26.9244	47.2341							61.129		63.3549			75.0177	122.405	11.3218	36.35	35.6743		66.3705	36.5284	71.9283	75.0365					72.2602	36.1514
GAS1-N40GS	FFYSNN[5.1187]GSQFYIR	1187	2	5.58902	163.06	4	b	1	144.362		187.456	112.596	37.4742	39.7211	21.136	30.4478		99.5422	133.638	38.4275	173.435	108.403	8.25773	37.5083	179.335	148.78	10.4966	64.6676					41.1525	73.583	26.7734		171.616
GAS1-N40GS	FFYSNN[5.1187]GSQFYIR	1187	2	5.58902	168.065	5	b	1		75.0659						37.3705	37.5329				34.2989			72.0239	37.5326	37.5296			35.1848	74.6582	112.6	10.5962	37.535	75.0662		74.8903		30.3237
GAS1-N40GS	FFYSNN[5.1187]GSQFYIR	1187	2	5.58902	186.076	6	b	1		36.8616	37.3883		76.3815		33.1851		36.8607			33.5445											37.5333	28.2999	5.01182	37.5333				37.5327
GAS1-N40GS	FFYSNN[5.1187]GSQFYIR	1187	2	5.58902	204.087	7	b	1	33.9084	37.4877	74.7609		36.7495	37.1555	41.0291	96.2364				37.1575	77.6344	28.1041		20.92	74.8913	74.8714	34.2187						29.6767		112.595			37.2695
GAS1-N40GS	FFYSNN[5.1187]GSQFYIR	1187	2	5.58902	366.139	8	b	1	38.5122		75.0583	37.6594		37.5307		34.0474	37.5333				36.3507		27.532	37.5083					41.3508							37.5303
GAS1-N40GS	FFYSNN[13.1187]GSQFYIR	1187	2		127.039	1	b	1		1521.99	3697.15		2087.22	2167.13			1852.89	2712.03		4779.73				3175.33		1191.55			1828.19	599.593		393.014	450.423	953.676	1120.69		2452.33	6709.08
GAS1-N40GS	FFYSNN[13.1187]GSQFYIR	1187	2		138.055	2	b	1		1379.98	5723.84		4107.18	2997.78			2490.26	3967.89		3510.12				2065.24		1239			2536.96	2107.33		1199.05		4935.25	4166.04	2662.33	4052.26	13228.4
GAS1-N40GS	FFYSNN[13.1187]GSQFYIR	1187	2		145.049	3	b	1		4611.14	6861.02		5427.09	4460.3			2722.66	4970.24		5787.2				4545.87		1752.45			4539.92	1763.27		1046.94	2004.64	2943.32	2752.23		4579.27	13915
GAS1-N40GS	FFYSNN[13.1187]GSQFYIR	1187	2		163.06	4	b	1		5645.33	10124.2		5124.56	5557.77			5358.28	7893.8		8302.12				6216.4		2951.53			6487.65	1913.13		1948.8	1289.61	5436.81	4245.22	4965.84	4323.04	19090.7
GAS1-N40GS	FFYSNN[13.1187]GSQFYIR	1187	2		168.065	5	b	1		1407.65	2117.96		2363.87	1798.63			1478.78	2311.41		2825.88				2702.96		633.172			1775.56	1429.5		1154.96	773.792	2404.25	1949.15	895.587	1657.51	8375.91
GAS1-N40GS	FFYSNN[13.1187]GSQFYIR	1187	2		186.076	6	b	1		1324.86	1254.93		806.826	1498.36			727.015	1082.3		1737.56				1063.65		436.119			647.884			884.73		1822.95	1154.59	337.311	551.02	9893.5
GAS1-N40GS	FFYSNN[13.1187]GSQFYIR	1187	2		204.087	7	b	1		4569.63	5608.87		6623.35	5229.41			4103.65	6995.58		6907.56				6213.42		2174.35			4016.07	2142.65		1272.67	949.16	8537.1	6912.59	4628.8	4394.61	23395.1
GAS1-N40GS	FFYSNN[13.1187]GSQFYIR	1187	2		366.139	8	b	1		2027.97	3079.77		5165.73	1745.81			2369.72	3308.39		2980.96				1500.3		812.142			2317.62	1567.56		468.308	613.733	1777.7	2550.58	1054.92	1847.52	8796.04
GAS1-N40GS	FFYSNN[8.1187]GSQFYIR	1187	2	7.57373	127.039	1	b	1	6692.36	1815.6		1515.01	3651.85	3337.58	4283.51	4387.67		2658.25	1849.13	3188.1	3388.46	4335.41	872.895	2428.66	1674.41	3610.36	2180.28	806.19	1196.31	1746.55	3404.36	1312.43	1884.73	519.067	1634.28	2166.99	2748.39	2013.59
GAS1-N40GS	FFYSNN[8.1187]GSQFYIR	1187	2	7.57373	138.055	2	b	1	2549.01	1204.12	2126.99		698.754		1332.45	1316.01	131.766	1227.94		1260.98	617.128	1073.88	55.4586	599.433	809.492	1020.53	783.799	418.644	790.498				282.458	261.258	283.422	920.626	608.066	1563.46
GAS1-N40GS	FFYSNN[8.1187]GSQFYIR	1187	2	7.57373	145.049	3	b	1	5214.9	3278.41		1968.96	3884.97	3953.63	4685.38	5322.15		4724.02	2508.94	6149.64	5173.93	5773.53	1370.53	2906.19	3976.69	2185.58	3195.69	2789.74		2157.13	3273.51	1808.84	1063.79	494.001	1914.21	2474.65	2886.91	3066.24
GAS1-N40GS	FFYSNN[8.1187]GSQFYIR	1187	2	7.57373	163.06	4	b	1	8330.42	7568.52		1810.54	5188.43	3602.24	5547.78	5817.21		5768.26	5623.49	6520.95	5251.67	5909.6	711.721	5049.1	3267.87	4409.02	4850.61	1917.26	2593.86	2458.91	2536.8	485.1	240.713		1507.19	4543.17	5913.11	3172.5
GAS1-N40GS	FFYSNN[8.1187]GSQFYIR	1187	2	7.57373	168.065	5	b	1	1485.68	1075.52	1080.95		508.947		814.512	1020.64	108.36	498.472		936.637	331.629	881.363	264.579	611.572	457.684	1047.53	641.381	529.458					56.4149	395.499	110.981	566.219	581.167	864.008
GAS1-N40GS	FFYSNN[8.1187]GSQFYIR	1187	2	7.57373	186.076	6	b	1	948.762	833.529	1030.85				431.179	526.431		736.57	671.15	532.495	173.326	193.29		202.153	384.116	296.655		207.653	604.193			258.916	47.2458	87.0847	283.828	255.516	251.142	577.978
GAS1-N40GS	FFYSNN[8.1187]GSQFYIR	1187	2	7.57373	204.087	7	b	1	4550.4	3464.19	4691.09		2914.31		3693.63	3377.61		2521.78	3084.45	3347.43	1899.79	3156.51	376.627	749.407	914.981	1905.59	1727.26	1566.99	1454.34	81.6455	145.307	111.606			860.229	1992.65	1226.41	1932.99
GAS1-N40GS	FFYSNN[8.1187]GSQFYIR	1187	2	7.57373	366.139	8	b	1	1471.47	1113.75	1878.99		1437.69		1239.46	1447.73	174.697	957.064	750.746	1703.38	1608.36	953.798	84.4438	459.455	1067.37	470.777	737.218	230.536	455.192	71.6644		199.64	75.9091	246.319	385.901	651.833	631.999	939.357
GAS1-N40GS	FFYSNN[18.1187]GSQFYIR	1187	2		127.039	1	b	1		86.3805			143.371		85.2928		41.0117	66.7085	106.943		90.571	127.369	145.156	84.0038	62.7657	30.3085		39.4144	151.684	63.3624		37.5335	66.2195	105.04	24.9827	60.2662
GAS1-N40GS	FFYSNN[18.1187]GSQFYIR	1187	2		138.055	2	b	1		197.311	189.509	251.377	352.829		156.595	330.064	39.1299	272.869	229.899	346.064						278.671	336.466	272.757	241.461	273.202	168.176	110.558	166.713	63.7792		594.368	106.433	13618.4
GAS1-N40GS	FFYSNN[18.1187]GSQFYIR	1187	2		145.049	3	b	1		274.375								132.898				347.731	99.0718	169.751		59.4066	127.657	52.7999		129.462	84.2125		69.6938			63.1461
GAS1-N40GS	FFYSNN[18.1187]GSQFYIR	1187	2		163.06	4	b	1		225.321		48.872				221.981		155.506	129.057		467.781	345.49			73.2639			71.3141	234.849	96.2161	34.5425					172.119	132.393	1244.83
GAS1-N40GS	FFYSNN[18.1187]GSQFYIR	1187	2		168.065	5	b	1		166.499	340.998	376.587	129.059		120.546	62.3629	349.651	350.548		74.9661	38.9387	211.641	91.3492		78.8683	41.4327	169.408	123.303	209.57	66.3812		245.534	80.4648	169.87	167.156	113.15		6723.77
GAS1-N40GS	FFYSNN[18.1187]GSQFYIR	1187	2		186.076	6	b	1		51.6607		108.118	129.318			110.442	121.799	261.317	138.404	138.202				13.974	9.31464	49.0351		114.735				117.708	28.4935			255.165	98.6735	3924.98
GAS1-N40GS	FFYSNN[18.1187]GSQFYIR	1187	2		204.087	7	b	1		106.595		153.206				100.206				422.417	363.119	188.582				94.7127	152.967	40.0842		234.587	65.6463		400.888			240.978	501.825	11377.1
GAS1-N40GS	FFYSNN[18.1187]GSQFYIR	1187	2		366.139	8	b	1		118.389	442.828				110.831	198.789	46.0028	370.465	227.16	498.24	330.034		32.2243		229.614	376.948		164.466	46.3543				48.8049			310.449	322.749	8375.72
GAS1-N40GS	FFYSNN[6.1187]GSQFYIR	1187	2	5.59327	127.039	1	b	1	150.099	37.528		30.3401	205.528	52.0308	52.0186	16.5896	119.377			36.8718		74.9935	95.8138		134.693		76.4929		16.8753	32.6534	112.524			78.2853	37.5324	75.0663
GAS1-N40GS	FFYSNN[6.1187]GSQFYIR	1187	2	5.59327	138.055	2	b	1	75.0621		89.7923			63.2461			37.4871	64.293		29.2371			115.582	37.2681			25.5458	37.5321					34.7026			37.5339	37.4885	20.3378
GAS1-N40GS	FFYSNN[6.1187]GSQFYIR	1187	2	5.59327	145.049	3	b	1	26.9244			28.1675	26.9235	34.701	100.693		31.1228		26.6394	29.8119	30.7178	75.0573	172.913	14.86	37.4883	37.1081		52.0177	37.3709	34.3074		37.4881		75.0382				89.699
GAS1-N40GS	FFYSNN[6.1187]GSQFYIR	1187	2	5.59327	163.06	4	b	1	151.88		181.441			35.1838	71.7704	18.1192	162.502	95.8033			82.8341	150.121		36.7669	187.466	144.623	33.4309				111.753	159.035	33.39	6.78778	28.2851	182.879	21.971	148.984
GAS1-N40GS	FFYSNN[6.1187]GSQFYIR	1187	2	5.59327	168.065	5	b	1						59.3758	37.5086	37.533			14.0753					75.0632	37.5085	37.5299			37.5346
GAS1-N40GS	FFYSNN[6.1187]GSQFYIR	1187	2	5.59327	186.076	6	b	1			37.5329		37.5339				29.2368															29.6747	37.5337
GAS1-N40GS	FFYSNN[6.1187]GSQFYIR	1187	2	5.59327	204.087	7	b	1	15.3817	78.2862	74.04			112.245	24.5209		112.602		30.6973	20.9512	49.877	28.1041		25.286	75.0164	74.7296	37.5094			65.0852					112.41	37.5064		37.533
GAS1-N40GS	FFYSNN[6.1187]GSQFYIR	1187	2	5.59327	366.139	8	b	1	37.9751		75.0583	36.8734								37.5095			28.0264	37.5324					75.069
GAS1-N40GS	FFYSNN[16.1187]GSQFYIR	1187	2	16.4357	127.039	1	b	1	377.878	1179.52		841.82	1188.98	1386.68	1043.82	1050.17	1392.23	406.27	429.19	1408.54	991.211	1254.21	1207.85	502.163	2376.12	1503.36	632.322	497.532	997.32	462.368	527.705	320.604	320.558	180.187	3118.88	839.356	1316.33
GAS1-N40GS	FFYSNN[16.1187]GSQFYIR	1187	2	16.4357	138.055	2	b	1		2675.88	2122.63	2322.15	1998.62	3221.88	2007.84	4721	2619.54	656.152	834.214	3478.59	2267.46	2212.21	1249.8	613.399	2502.32	1448.91	1253.39	1521.19	982.093	1210.77	1492.01	947.359	1130.21	523.287	9521.66	1338.04	2680.28
GAS1-N40GS	FFYSNN[16.1187]GSQFYIR	1187	2	16.4357	145.049	3	b	1	189.859	2797.93		1608.59	3109.27	4432.18	2356.44	2270.82	2756.06	987.594	510.677	3177.67	2342.41	1899.97	1458.35	492.023	3518.12	1533.42	1417.63	1104.83	1407.52	1079.31	1073.71	369.47	1181.27	386.084	5430.46	1254.13	2403.09
GAS1-N40GS	FFYSNN[16.1187]GSQFYIR	1187	2	16.4357	163.06	4	b	1		5240.06		3387.66	5693.93	8773.14	3658.9	5638.2	3214.67	688.674	969.357	4909.28	4646.24	3671.85	2777.66	1602.71	5516.14	3536.2	3168.95	1870.98	2488.23	1129.03	1892.56	1352.62	1282.02	573.304	10585.1	2576.41	3530.66
GAS1-N40GS	FFYSNN[16.1187]GSQFYIR	1187	2	16.4357	168.065	5	b	1	942.297	1578.39	983.543	683.523	1243.84	3074.66	1674.89	1278.38	1667.3	433.18	210.811	2091.97	1671.61	1340.16	690.394	816.882	1293.78	1399.52	985.545	808.33	743.749	248.242	979.72	458.752	647.139	484.031	6476.46	673.757	2009.45
GAS1-N40GS	FFYSNN[16.1187]GSQFYIR	1187	2	16.4357	186.076	6	b	1		736.482		1023.58	900.131	651.705	544.867	565.786	567.881	248.702		1062.75	350.612	267.425	460.329	459.148	798.365	738.774	811.767	689.716	484.981	224.071	740.85	564.264	651.934	211.688	3436.23	533.955	1524.52
GAS1-N40GS	FFYSNN[16.1187]GSQFYIR	1187	2	16.4357	204.087	7	b	1		5783.56	2893.98	2171.34	5248.71	6952.95	4415.64	4891.63	2997.6	1544.69	1833.16	6446.27	3437.47	3029.68	2240.68	1677.55	4195.13	3330.47	1774.31	1980.76	1929.48	1471.92	1883.26	1665.14	1754.06	961.1	13953.4	2263.81	4524.18
GAS1-N40GS	FFYSNN[16.1187]GSQFYIR	1187	2	16.4357	366.139	8	b	1	327.242	1167.89		965.237	2114.17	1915.66	2032.73	1570.41	1664.87	749.855	790.089	3905.35	1924.8	1159.9	746.609	377.121	2423.83	2212.53	522.494	967.428	952.909	745.93	910.506	751.304	876.212	320.415	4490.13	813.56	838.334
GAS1-N40GS	FFYSNN[22.1187]GSQFYIR	1187	2	21.6208	127.039	1	b	1	9.00258			36.1539	31.2303	54.0724	36.0176	49.828		41.3847	27.1042		160.227	124.463	75.0666	26.4926		32.1339	37.1291					36.766		26.5697	25.9891		36.8683	206.699
GAS1-N40GS	FFYSNN[22.1187]GSQFYIR	1187	2	21.6208	138.055	2	b	1	83.0798	53.7797	77.531	155.746		78.5888		45.6149		74.9705				86.1825	64.6658	89.9063	63.4477	128.347	66.2962	187.5	37.4725	110.656	57.118		30.8315	33.4744		37.5336	20.9975	192.017
GAS1-N40GS	FFYSNN[22.1187]GSQFYIR	1187	2	21.6208	145.049	3	b	1	36.9366	27.4972	35.987	98.1221		83.2829			36.6598		27.8058		116.714	36.9511			87.0333				71.195					65.2169	108.858		192.928	647.064
GAS1-N40GS	FFYSNN[22.1187]GSQFYIR	1187	2	21.6208	163.06	4	b	1			35.3369	20.3241			32.3692	123.957	95.3115		20.4533	111.161	262.007		24.3832			55.912	57.8326	148.316	71.2891	37.1559		180.425			28.3586		23.3691	82.3612
GAS1-N40GS	FFYSNN[22.1187]GSQFYIR	1187	2	21.6208	168.065	5	b	1	19.4265		28.0905	17.49	37.3993				33.3371			36.3975					3.89392	74.2348				59.6717		54.4828	37.2626		37.5302	74.7056	67.587
GAS1-N40GS	FFYSNN[22.1187]GSQFYIR	1187	2	21.6208	186.076	6	b	1	105.508	154.123			28.1509	294.413	37.7387	25.8792	42.3985	102.659	165.006	62.6822	96.3634		34.4495	52.9728	73.9232		34.7451	25.1076	25.498	74.7789	29.6752		48.0716
GAS1-N40GS	FFYSNN[22.1187]GSQFYIR	1187	2	21.6208	204.087	7	b	1	35.7606		32.2269	50.8292	32.644	89.8706	94.98	102.456	101.88			123.517		68.6917	17.8111				96.3952	24.836	33.8884	144.871						56.9711	74.203	215.65
GAS1-N40GS	FFYSNN[22.1187]GSQFYIR	1187	2	21.6208	366.139	8	b	1	362.83	195.782			163.347	34.5798	33.3906			128.622		113.914	168.323	108.159		37.623		26.8656			89.6758	8.21391	23.4314	59.7789		23.634	107.517	51.2683
GAS1-N40GS	FFYSNN[12.1162]GSQFYIR	1162	2	12.1931	127.039	1	b	1	18142.4	22186.5	30258.7	27007.6	55959.1	65709.3	18288.7	22277	14119.2	19416.9	18557.4	30643.3	29037	31132.5	12496.9	13498	38171.4	21874.6	15148.4	10536.3	19692.5	2484.13	2967.78	1759.5	2026.14	5850.43	6707.16	11529.3	16870.1	23509.4
GAS1-N40GS	FFYSNN[12.1162]GSQFYIR	1162	2	12.1931	138.055	2	b	1	35707.1	38542.9	44575	42876.3	116320	104583	34235.9	40866.4	26730.5	40311.1	35996.8	59050.7	55332.8	53480.6	20288.2	22314.8	69404.1	42438	25654.2	20815.2	31971.5	2295.71	4240.88	3069.45	2904.79	6755.44	7729	16284.8	27499.4	28958.5
GAS1-N40GS	FFYSNN[12.1162]GSQFYIR	1162	2	12.1931	145.049	3	b	1	38223	42758.4	53034.2	48028.9	110615	106915	34208.4	41567.6	27299.8	40022.4	37334.8	66480.1	53473.3	59269.6	21167.3	21743.6	70608.9	43100.3	27726.3	22451.1	33142.8	3309.67	5569.85	4555.08	3249.56	10428.6	11102.1	21162.7	27810.4	38373.4
GAS1-N40GS	FFYSNN[12.1162]GSQFYIR	1162	2	12.1931	163.06	4	b	1	65254.5	65047	80746.3	77100.3	180348	180477	56907.8	69280.4	43016	69454.6	57778.3	105761	92762.5	84426.9	33070.5	38643.2	110058	69982.3	45320.6	36855	54269	4071.82	8487.83	6942.62	4864.53	13944.9	15530.5	36250.7	44913.7	62294.6
GAS1-N40GS	FFYSNN[12.1162]GSQFYIR	1162	2	12.1931	168.065	5	b	1	24397.7	26176.2	27674	29011.2	76357.2	71451.6	22485.1	27851.5	17632.9	27026	22914	42595.6	39963.5	39794.1	14685.4	15593.1	46331.6	26345	17609.2	15389.9	22520.7	952.912	2137.03	1447.81	1896.38	4647.27	5492.23	13099.4	19157.8	16809.7
GAS1-N40GS	FFYSNN[12.1162]GSQFYIR	1162	2	12.1931	186.076	6	b	1	13398.1	13839.7	15642.8	16401.6	37766.5	36246.6	11473.6	14953.6	8706.73	13086	11815.2	21345	21297.4	20960.9	6954.27	6711.37	23162.3	14787.7	10105.3	8590.6	12281.7	653.208	1502.85	1039.1	1053.57	3758.77	3221.4	5721.18	8576.18	10607.3
GAS1-N40GS	FFYSNN[12.1162]GSQFYIR	1162	2	12.1931	204.087	7	b	1	76560.7	79642.2	84957.6	95041.7	231697	223708	69639.3	79897.2	55311.7	82835	73547.7	130211	126672	114097	43051.5	45053.5	140521	77567.7	53706.6	41064.7	68291.9	4390.74	5563.43	4480.57	4991.06	15503.9	10923.8	32506.6	47957.8	56401.3
GAS1-N40GS	FFYSNN[12.1162]GSQFYIR	1162	2	12.1931	366.139	8	b	1	29929.7	26891.9	31017	36211.1	76720.7	75941.1	26160.8	29730	19773.8	29849.4	24625.3	44464.9	45081	44949.3	18460.8	18419.2	47965.5	29666.1	19383	15748	24304.1	1662.51	3211.1	1390.17	1791.46	7235.25	5510.58	11031.5	14714.3	17353.7
GAS1-N40GS	FFYSNN[23.1162]GSQFYIR	1162	2	22.4005	127.039	1	b	1	14.3464	9.73947	87.3284	73.4118		138.932	37.534		29.0807			73.9184		115.298	102.836		36.6151	182.866	37.7391	33.4768	36.96		36.933			34.0582	36.9567
GAS1-N40GS	FFYSNN[23.1162]GSQFYIR	1162	2	22.4005	138.055	2	b	1	136.369	166.934	41.0528	57.0521	380.49	280.283		73.4886	41.4025		52.3442			65.7092	47.2503	71.0243	349.545	111.017		95.4698	68.3358	27.1431			47.0185	35.9485	92.896	109.842	48.2663
GAS1-N40GS	FFYSNN[23.1162]GSQFYIR	1162	2	22.4005	145.049	3	b	1	220.04		187.02	54.882	70.7761			37.3867		129.937	25.373				10.7934		40.1957		172.004	28.7581		37.5303	107.328		225.805	182.042	88.1541
GAS1-N40GS	FFYSNN[23.1162]GSQFYIR	1162	2	22.4005	163.06	4	b	1	140.758				16.793	252.103	90.4457	81.9188	207.928	164.829			137.178	48.1835	50.0188	65.2166		8.29396	68.2362	30.6986	3.99167	76.9271	29.6738	35.2638	33.4766			74.9021
GAS1-N40GS	FFYSNN[23.1162]GSQFYIR	1162	2	22.4005	168.065	5	b	1		100.226			180.016	24.5461	147.89		77.5513	102.645		30.7363	107.98	44.0878	17.8747	85.3315	90.3263	56.5729		71.7087	29.6643						131.106		33.3889
GAS1-N40GS	FFYSNN[23.1162]GSQFYIR	1162	2	22.4005	186.076	6	b	1	116.047		64.0417		28.9862	21.7969	19.7668		61.3855	21.7699				30.5993	62.3795	66.3737		16.6638	44.946		18.55	21.2322		59.6888	13.543	75.9141	72.7668
GAS1-N40GS	FFYSNN[23.1162]GSQFYIR	1162	2	22.4005	204.087	7	b	1	40.595		242.707	53.6158		44.8378				65.9637	96.6131	27.1761	196.542			78.4136	100.903	59.7485	50.2181		184.34	70.719				53.5659	289.344	16.5057	35.2928
GAS1-N40GS	FFYSNN[23.1162]GSQFYIR	1162	2	22.4005	366.139	8	b	1		50.9363	14.6664		192.468	316.999		58.5865	38.6032	45.3261	67.7423	83.4018	294.305	43.064	365.9	142.029			13.8995	52.2019		64.3761		109.065	155.745		146.207		22.838
GAS1-N40GS	FFYSNN[27.1162]GSQFYIR	1162	2	27.235	127.039	1	b	1								14.9002					41.0175
GAS1-N40GS	FFYSNN[27.1162]GSQFYIR	1162	2	27.235	138.055	2	b	1					18.7263								37.5339										37.5328						31.0523	88.1518
GAS1-N40GS	FFYSNN[27.1162]GSQFYIR	1162	2	27.235	145.049	3	b	1					15.6421		6.89258	37.5331			37.534			19.3557				37.5361
GAS1-N40GS	FFYSNN[27.1162]GSQFYIR	1162	2	27.235	163.06	4	b	1			22.04	14.0752					68.7617	37.5329		75.0678	29.2337	37.2458	37.5322	37.5366		29.7419					36.14					22.3997	14.666	50.3252
GAS1-N40GS	FFYSNN[27.1162]GSQFYIR	1162	2	27.235	168.065	5	b	1	37.5488			23.5685		37.3176			37.5328
GAS1-N40GS	FFYSNN[27.1162]GSQFYIR	1162	2	27.235	186.076	6	b	1	37.5452	37.5337												37.5053				37.5323					75.0655					37.5339
GAS1-N40GS	FFYSNN[27.1162]GSQFYIR	1162	2	27.235	204.087	7	b	1			37.5346	11.0012				35.7951		37.5295	27.5017	37.534		26.51									37.5331
GAS1-N40GS	FFYSNN[27.1162]GSQFYIR	1162	2	27.235	366.139	8	b	1		41.0199				40.8745	36.871								37.5322	14.2779														37.5337
GAS1-N40GS	FFYSNN[22.1162]GSQFYIR	1162	2	21.2563	127.039	1	b	1	175.217		167.791		88.7979		29.1253	95.0725	17.3745	171.713			27.1134				5.54006			27.6645	96.6182	41.0182	39.8805	36.2402	37.0782		37.1768			125.487
GAS1-N40GS	FFYSNN[22.1162]GSQFYIR	1162	2	21.2563	138.055	2	b	1		62.2088		102.543	31.5665	24.6496	25.1681	50.6476	37.6174			42.9844		228.115	13.1851	111.106	108.567		178.25		69.3762	4.86704	198.911	37.558	111.515		57.8159	55.5443	29.4499	2206.88
GAS1-N40GS	FFYSNN[22.1162]GSQFYIR	1162	2	21.2563	145.049	3	b	1		112.599	114.426	115.636		40.0627					29.9772			211.316			42.2844		68.6669	37.5301	19.9268	110.235	37.4452	37.269		54.8307	14.6035
GAS1-N40GS	FFYSNN[22.1162]GSQFYIR	1162	2	21.2563	163.06	4	b	1	60.7854		37.7297	112.817		47.4945	13.5554	62.5038	63.2638	77.1156		62.4109	68.5017			65.2182	97.3713	52.7691		19.0915		73.1834	106.56	109.405		112.593		16.0726	30.273	128.101
GAS1-N40GS	FFYSNN[22.1162]GSQFYIR	1162	2	21.2563	168.065	5	b	1	89.9279				89.3684	26.5997	25.1031		74.767	37.2755	20.6462							45.859			29.6752	33.0512	26.9251		36.6304	34.7295	74.1538	69.6777	32.9354	879.276
GAS1-N40GS	FFYSNN[22.1162]GSQFYIR	1162	2	21.2563	186.076	6	b	1		220.215	45.2424				159.41		32.333	132.254	68.1059	148.142	171.593	186.591	57.9149		108.165	43.1457		183.219	86.7503	48.642	36.7989	89.0811	13.4259	112.063			220.611	656.112
GAS1-N40GS	FFYSNN[22.1162]GSQFYIR	1162	2	21.2563	204.087	7	b	1	14.6289	54.5425			129.322	50.7881	11.6012	31.9587				173.388		154.269	224.075	58.5564	142.992	111.266	113.744	102.266	179.831			96.0693	49.4036		139.33	6.25005	75.5425
GAS1-N40GS	FFYSNN[22.1162]GSQFYIR	1162	2	21.2563	366.139	8	b	1	30.0271	112.821		16.7191	55.5896	232.896		48.7024		108.272		38.2871	10.0424	263.966	114.284	113.62		84.428	16.4505		130.301	130.718		58.8354	28.435		35.4674		53.7566	212.066
GAS1-N40GS	FFYSNN[18.1162]GSQFYIR	1162	2	18.2124	127.039	1	b	1	157.64	144.562					29.3186	96.1087	64.078	67.2903	182.827	92.1703		43.8033	33.25	93.0514		17.511	56.8523	109.965			215.295	120.089	60.5763	113.497			126.614
GAS1-N40GS	FFYSNN[18.1162]GSQFYIR	1162	2	18.2124	138.055	2	b	1		63.1133				51.115	244.595	138.933	71.8451			345.115		154.539		59.3618	163.44	134.442	10.2942	206.605		91.526		28.6979				302.434	60.0087
GAS1-N40GS	FFYSNN[18.1162]GSQFYIR	1162	2	18.2124	145.049	3	b	1		441.413	627.726	155.523			188.536	25.4727					560.141	409.531		87.0814	259.751	217.149		70.4543	125.385	191.825	53.5919	144.097	97.8066	144.274	183.176	40.6362	98.2927
GAS1-N40GS	FFYSNN[18.1162]GSQFYIR	1162	2	18.2124	163.06	4	b	1		151.243					254.381	565.607		231.021		437.037	301.126	221.464	18.5254	186.492	550.194	557.318	84.5001	49.7411	142.795	192.087	136.325	81.7537	38.7958	150.166		60.3726	72.9614
GAS1-N40GS	FFYSNN[18.1162]GSQFYIR	1162	2	18.2124	168.065	5	b	1		84.754		245.09		138.017	140.371		64.3775	165.378		133.429	249.679	101.39	14.261	22.986	137.278	104.045		278.128	96.7937	48.5892	48.2059	65.486	136.345	69.1889	37.8791	108.043
GAS1-N40GS	FFYSNN[18.1162]GSQFYIR	1162	2	18.2124	186.076	6	b	1	57.3708	368.121	379.166	37.6526		30.9465	172.841	243.054	126.128	246.747	16.4985				46.598	57.977		40.2287		135.781		117.399	91.3613				12.8609	60.3063
GAS1-N40GS	FFYSNN[18.1162]GSQFYIR	1162	2	18.2124	204.087	7	b	1		805.9		164.624			372.625	150.462	65.9863	103.977	219.532	322.413		58.6113			247.483	198.35				164.451	444.013	173.15	193.15		100.338
GAS1-N40GS	FFYSNN[18.1162]GSQFYIR	1162	2	18.2124	366.139	8	b	1	69.9396	164.456	116.619	265.825		139.9	353.274			202.919	151.878		319.52	38.1437				52.2168	102.605	33.1026			85.1978		63.2305	79.2347	61.1301	16.2263
GAS1-N40GS	FFYSNN[9.1162]GSQFYIR	1162	2	9.56152	127.039	1	b	1	125.309							122.223			45.9169				606.989					196.146		1444.6		391.835		1240.47	964.668	696.522		8264.41
GAS1-N40GS	FFYSNN[9.1162]GSQFYIR	1162	2	9.56152	138.055	2	b	1							21.4429		12.4686		130.784		108.685	161.65	109.689		130.434		102.08			594.455		412.484	469.018	409.759	855.483	160.636		8972.47
GAS1-N40GS	FFYSNN[9.1162]GSQFYIR	1162	2	9.56152	145.049	3	b	1	58.6162					152.413			31.46		115.883	40.0597			105.358					12.676		1638.69		796.109	669.203	691.533	842.605	1451.42		11480.2
GAS1-N40GS	FFYSNN[9.1162]GSQFYIR	1162	2	9.56152	163.06	4	b	1	227.3							424.222	62.2777	58.2793	121.06						56.8097		122.331	610.063		804.12		688.667	191.692	1426.66	675.33	830.985		13589.7
GAS1-N40GS	FFYSNN[9.1162]GSQFYIR	1162	2	9.56152	168.065	5	b	1				65.0963	181.008		64.0935	59.5216				80.4082	29.4354							41.1574		127.183		249.842	117.545	175.463	425.234	195.402		6739.87
GAS1-N40GS	FFYSNN[9.1162]GSQFYIR	1162	2	9.56152	186.076	6	b	1	106.345			128.295	48.6291	39.3829	306.537	20.2746	149.678	18.1074	78.1356				131.149				166.834	101.714		254.548		101.96		54.7889	241.231			2854.81
GAS1-N40GS	FFYSNN[9.1162]GSQFYIR	1162	2	9.56152	204.087	7	b	1	367.636			467.12	221.45	492.021			114.982	112.754	429.68	133.764	269.95	132.522					122.817	91.3677		404.007		392.81	560.1	368.754	1242.97	143.827		15281.6
GAS1-N40GS	FFYSNN[9.1162]GSQFYIR	1162	2	9.56152	366.139	8	b	1	63.3654			50.6623			52.7536		182.694	90.1244	120.035		16.3194		27.0982					46.849		245.706		153.945	82.1866		402.919			6273.07
GAS1-N40GS	FFYSNN[13.1162]GSQFYIR	1162	2	12.2072	127.039	1	b	1	9372.77	12013.2	1942.34	590.876	31646.4	39078.8	1232.03	12609.6	6815.42	13248.8	11343.2	20480.3	18390.8	20684.3	7781.61	8147.78	25370.7	11696.7	9705.81	6023.96	12252.7	1260.04	1612.29	795.953	1232.91	2345.7	4203.26	6254.25	9908.92
GAS1-N40GS	FFYSNN[13.1162]GSQFYIR	1162	2	12.2072	138.055	2	b	1	19622.8	22833.8	1068.02		71233.7	68292.1	661.768	24183.3	14481.4	27338.1	24092.6	42104	39006.7	38681.4	14251.1	15019.9	50301.6	29927.2	16975.5	14180.1	22285.9	2562.77	1978.04	1659.59	1495.2	4850.24	4259.69	9905.69	16920.5
GAS1-N40GS	FFYSNN[13.1162]GSQFYIR	1162	2	12.2072	145.049	3	b	1	19167.1	25199.1	3237	1126.85	64298.9	65866.7	3314.74	22996.4	13902.9	25528.7	24761.5	44859.7	34028.4	39408.2	12893.5	14027.2	48535.4	27344.4	18910.5	14511.4	23723.8	2070.94	2888.3	2039.38	1043.16	4986.15	6240.66	13034.6	17002.3
GAS1-N40GS	FFYSNN[13.1162]GSQFYIR	1162	2	12.2072	163.06	4	b	1	31331.9	38443.6	5256.92	2600.38	106002	112738	1714.84	38277.2	24060.2	47674.9	37159.2	71158	65403.2	59212.1	22337.4	26754.7	77005.3	41991.9	31141.1	24322.6	37308.6	3161.97	4830.63	3538.03	1864.99	9945.06	9142.55	21604.7	28003.7
GAS1-N40GS	FFYSNN[13.1162]GSQFYIR	1162	2	12.2072	168.065	5	b	1	12605.9	15501.7		699.821	47233.8	47718	598.629	16193.3	9998.21	18742	15025.4	30908.7	29492.4	29244.1	10369.3	11388.1	34504.2	18908.6	11903	10945	16581.2	1080.29	1373.19	1225.41	1651.47	2469.32	4089.68	6550.71	12542.2
GAS1-N40GS	FFYSNN[13.1162]GSQFYIR	1162	2	12.2072	186.076	6	b	1	6745.6	8573.17	217.159	347.315	23105.8	22771.7	156.827	8695.64	4734.43	8789.07	7659.46	15416.6	15448.4	14402.3	5343.89	3946.71	16725.3	10129.7	6826.36	5951.13	9015.97	434.264	474.664	705.973	706.281	1833.76	1983.77	3369.14	5720.55
GAS1-N40GS	FFYSNN[13.1162]GSQFYIR	1162	2	12.2072	204.087	7	b	1	40149.7	48626.6	1687.83	1338.13	145483	149022	3334.76	45993.7	32482.4	55166	48500.2	89686	94439.1	85563.1	31720.2	32300.3	102849	57821.2	36973.7	27928.7	48491.9	4009.13	3349.94	3689.54	3724.46	11622.4	7315.47	18313.2	30459
GAS1-N40GS	FFYSNN[13.1162]GSQFYIR	1162	2	12.2072	366.139	8	b	1	15177.5	15675.5	1232.63	580.971	47202.2	49773.3	1400.9	16460.7	11485.9	19804.9	15544.1	30610.3	34345.8	33582.5	13297.6	11764	35626.6	21953.5	12843.5	9956.03	16904.5	1784.67	1848.91	1025.23	1647.22	4250.58	3443.41	5527.49	8539.59
GAS1-N40GS	FFYSNN[26.1162]GSQFYIR	1162	2	25.4157	127.039	1	b	1					37.5324	37.5306										37.5327	37.5298								37.3887					198.967
GAS1-N40GS	FFYSNN[26.1162]GSQFYIR	1162	2	25.4157	138.055	2	b	1									32.9349	35.1831							37.5331	72.2445				23.5692	31.0519
GAS1-N40GS	FFYSNN[26.1162]GSQFYIR	1162	2	25.4157	145.049	3	b	1									37.529			31.0532		88.9843			24.765		25.1788						37.5088				36.8711
GAS1-N40GS	FFYSNN[26.1162]GSQFYIR	1162	2	25.4157	163.06	4	b	1	37.5091			37.532	32.5939	16.4892								42.4274		75.0685
GAS1-N40GS	FFYSNN[26.1162]GSQFYIR	1162	2	25.4157	168.065	5	b	1			37.5342	37.4885	60.3486							12.8778																37.5319		187.628
GAS1-N40GS	FFYSNN[26.1162]GSQFYIR	1162	2	25.4157	186.076	6	b	1			36.7686			75.0686								36.768					5.82594		37.3881		41.1558	35.8081					36.2459
GAS1-N40GS	FFYSNN[26.1162]GSQFYIR	1162	2	25.4157	204.087	7	b	1				16.7027	111.995	14.2245		53.4332	64.5857			22.6419	72.2443					70.3687				29.0429	5.82465	37.53		35.1846		37.5334
GAS1-N40GS	FFYSNN[26.1162]GSQFYIR	1162	2	25.4157	366.139	8	b	1	8.26264		27.6683			75.0675		39.2326		37.3886			112.378	37.2692				31.0537			37.6529					37.3884			28.6501	117.444
GAS1-N40GS	FFYSNN[16.1162]GSQFYIR	1162	2	15.8141	127.039	1	b	1	1863.25	1519.18	1810.78	1673.16	2449.99	2508.94	1540.72	1844.56	1570.19	539.962	316.44	2659.76	1620.03	978.246	802.504	323.525	1750.78	550.087	320.165	968.528	973.306	251.888	611.015	254.81	196.409	830.052	250.735	69.7219	2032.64
GAS1-N40GS	FFYSNN[16.1162]GSQFYIR	1162	2	15.8141	138.055	2	b	1	5361.65	3898.74	5132.59	3820.27	4312.42	5191.96	3913	4681.87	4919.96	3038.2	1875.11	2981.67	4372.29	2536.08	3609.15	2768.54	3758.07	568.076		2334.01	3428.36	1600.23	2589.19	3417.39	1246.91	2370.82	2516.04		4376.38
GAS1-N40GS	FFYSNN[16.1162]GSQFYIR	1162	2	15.8141	145.049	3	b	1	3669.55	2164.59	3173.98	3509.63	5109.25	5744.99	2178.09	2921.29	2153.95	1293.01	1345.31	3718.47	2510.57	2163.53	1571.31	1178	3735.02	610.302	24.9335	1576.17	1959.12	258.003	507.533	250.713	188.476	968.777	1705.36	291.767	4478.84
GAS1-N40GS	FFYSNN[16.1162]GSQFYIR	1162	2	15.8141	163.06	4	b	1	6668.39	4152.21	5941.17	3885.51	6303.89	8103.12	5133.93	5485.64	2967.26	2696.78	1414.35	4802.59	4688.69	4092.7	2177.81	1732.82	6713.16	1087.58	195.142	2888.12	2548.23	393.833	1168.25		495.641	1215.4	1936.23		7717.64
GAS1-N40GS	FFYSNN[16.1162]GSQFYIR	1162	2	15.8141	168.065	5	b	1	3041.43	2938.34	2851.03	2302.14	2820.07	3931.42	3347.67	2711.29	3572.72	1710.04	802.36	2026.65	2028.98	1145.74	2044.25	1389.21	2602.95	361.324		1766.24	2947.91	625.465	1014.68	1932.56	709.533	910.052	1714.14		3717.31
GAS1-N40GS	FFYSNN[16.1162]GSQFYIR	1162	2	15.8141	186.076	6	b	1	1521.52	1587.23	1481.09	1246.79	2200.65	1650.57	1782.88	1643.56	602.529	464.08	595.974	930.863	1115.56	985.235	916.391	426.575	1494.31	206.919		1276.89	1364.02	384.781	439.183	720.662	413.219	369.229	537.09	37.5356	1560.08
GAS1-N40GS	FFYSNN[16.1162]GSQFYIR	1162	2	15.8141	204.087	7	b	1	5843.93	4053.19	6926.85	6000.35	7178.07	7936.92	5605.13	4658.83	5803.36	2920.99	2064.37	5354.76	4420.15	3744.3	3920.33	2490.14	5356.24	2037.84		3481.68	3179.97	453.589	1606.53	3035.05	971.542	1464.22	1823.4		5195.65
GAS1-N40GS	FFYSNN[16.1162]GSQFYIR	1162	2	15.8141	366.139	8	b	1	2991.62	3363.79	2765.14	3173.4	3247.74	4310.41	2888.17	2847.66	3121.9	1009.35	940.72	2686.09	2315.51	2480.11	3033.49	1966.1	3247.55	488.353	61.8173	1729.79	2998.27	159.662	943.097	1631.24	769.803	1837.77	1577.53		3987.3
GAS1-N40GS	FFYSNN[8.1162]GSQFYIR	1162	2	7.77022	127.039	1	b	1	1186.39			3701.6		4484.51	1974.45	1734.91	1510.76	961.8	2889.33	1962.74			23.165	101.955			823.077	243.743	66.5428	2067.75	418.926	1207.64	361.9	712.185	1081.67	278.299	231.392	7632.18
GAS1-N40GS	FFYSNN[8.1162]GSQFYIR	1162	2	7.77022	138.055	2	b	1	556.982	375.391	313.187		15.3036			269.905	392.36	229.843	121.34	108.777	324.204		49.4054	163.888	89.3697	243.343			298.008	150.894	684.028		949.392	792	1235.35	907.435	670.378	6826.78
GAS1-N40GS	FFYSNN[8.1162]GSQFYIR	1162	2	7.77022	145.049	3	b	1				2865.13		6764.59	3527.95	1716.1	2059.63	862.251	3203.52	981.527					103.791		945.216	501.62		1466.92	713.944	1288.27	969.095	662.942	1386.63	132.959	475.899	10322.7
GAS1-N40GS	FFYSNN[8.1162]GSQFYIR	1162	2	7.77022	163.06	4	b	1	1155.75	562.548		2109.38		5167.12	1779.41	1276.83	1414.96		3755.89	852.521		99.9029	268.088			124.913		463.751		1292.9	1467.18	1070.61	487.307	1650.21	1387.32	731.711	1126.85	12712.4
GAS1-N40GS	FFYSNN[8.1162]GSQFYIR	1162	2	7.77022	168.065	5	b	1	399.526		418.958		171.731		219.3					67.5596	193.09	60.9902		100.483	17.1011		181.465	256.77	52.327		713.121		192.919	675.244	814.866	478.757	535.884	5868.01
GAS1-N40GS	FFYSNN[8.1162]GSQFYIR	1162	2	7.77022	186.076	6	b	1					209.196		241.878			165.634		172.816	220.979	297.451	51.9874		18.6726	81.929	145.515				411.54	288.425	48.2433	414.683	442.984	234.841	277.053	2761.74
GAS1-N40GS	FFYSNN[8.1162]GSQFYIR	1162	2	7.77022	204.087	7	b	1		70.6976	808.673	650.274	125.917		785.997	291.987	401.144			129.063	223.794		128.098	52.4601		384.199	243.232		155.665	314.177	1159.73	102.686	949.656	1674.76	1874.93	969.07	1171.31	14505.9
GAS1-N40GS	FFYSNN[8.1162]GSQFYIR	1162	2	7.77022	366.139	8	b	1	488.399	265.875	234.424		231.244							129.484	167.75	12.864			306.269	165.167		65.32	22.9478		344.202		134.407	772.373	658.942	344.208	335.696	5751.93
GAS1-N40GS	FFYSNN[7.1162]GSQFYIR	1162	2	7.2625	127.039	1	b	1	3781.43	3301.82				3830.26	250.899	1562.92	1726.18	893.589	2937.13	564.903		4005.57		2454.54	1114.16	3006.68	664.337	236.62		2916.49	3931.49	1309.2	1672.35	1323.84	1969.31	1911.5	2648.43	2536.84
GAS1-N40GS	FFYSNN[7.1162]GSQFYIR	1162	2	7.2625	138.055	2	b	1	358.998			50.3919	70.0875		524.087	422.463	400.165		216.509	150.482	87.9064	244.016	109.567		98.0095	232.841	79.4984		26.9408	165.495	189.057		187.182	69.7176	302.961	249.327	140.369	196.326
GAS1-N40GS	FFYSNN[7.1162]GSQFYIR	1162	2	7.2625	145.049	3	b	1	5146.03	3403.57				7947		2008.38	2107.51	180.194	3740.63	274.905		3614.88		2867.81	1433.85	2721.94	340.514	182.714		2241.84	3719.96	1399.02	861.775	857.2	2669.54	4423.51	2790.81	4304.04
GAS1-N40GS	FFYSNN[7.1162]GSQFYIR	1162	2	7.2625	163.06	4	b	1	3776.75	2106.27				5368.45	666.858	1390.91	1662.15		3731.63	581.118		3348.02	153.754	3182.17	883.387	1387.87		482.712		1993.83	2567.21	2517.75	925.903	658.145	1550.07	2128.75	1448.37	2811.56
GAS1-N40GS	FFYSNN[7.1162]GSQFYIR	1162	2	7.2625	168.065	5	b	1			363.02	108.462	168.132								137.615						122.904	149.625	191.044		184.752		72.1186	132.897		425.806		169.75
GAS1-N40GS	FFYSNN[7.1162]GSQFYIR	1162	2	7.2625	186.076	6	b	1	453.169	197.887	40.5068	106.904						140.809		46.4748		231.671	48.6218			108.976			145.709	214.687		304.94			140.628	191.991
GAS1-N40GS	FFYSNN[7.1162]GSQFYIR	1162	2	7.2625	204.087	7	b	1	1175.57	206.508	674.787		152.87			224.773	416.715	85.616		93.4452		463.42	295.609	262.389	294.748	286.744			114.304	438.217	494.381	165.1	139.948	150.411		286.557	203.902	525.707
GAS1-N40GS	FFYSNN[7.1162]GSQFYIR	1162	2	7.2625	366.139	8	b	1			176.11	11.0914	156.86							96.9324	70.8418					448.497	28.9126	13.3234	6.60118						202.161			188.655
GAS1-N40GS	FFYSNN[2.1162]GSQFYIR	1162	2	2.20928	127.039	1	b	1												37.5331	28.5775	72.8695	90.4877			37.5331				40.9162		37.2685		37.5325		31.0518		13.0136
GAS1-N40GS	FFYSNN[2.1162]GSQFYIR	1162	2	2.20928	138.055	2	b	1	37.3417	16.4982	19.5857	37.3883		36.8706		30.2342	23.568	30.3072				29.6744						37.2682		37.3722	19.2483			75.0664				38.1283
GAS1-N40GS	FFYSNN[2.1162]GSQFYIR	1162	2	2.20928	145.049	3	b	1	38.1086	13.2404	39.2554		31.136	159.34	37.3		122.141		23.4179				74.0563	36.1308	37.5322						37.0733	37.275		73.6456	74.8841		49.5996
GAS1-N40GS	FFYSNN[2.1162]GSQFYIR	1162	2	2.20928	163.06	4	b	1				51.8803	69.7999	16.4877	37.1624		23.2961	28.8607	34.6463		12.1048	19.0884	72.0001	72.0275	32.0558			37.4838	35.1868	37.5341	36.3265			78.403	37.5093	13.9222	37.2461
GAS1-N40GS	FFYSNN[2.1162]GSQFYIR	1162	2	2.20928	168.065	5	b	1	113.004	75.5953	37.5336		37.5347	37.5414	60.6086	36.3489					21.2647																37.5337
GAS1-N40GS	FFYSNN[2.1162]GSQFYIR	1162	2	2.20928	186.076	6	b	1	37.534	32.9644			34.7463							37.5331			71.3995				9.34093		37.5322								37.5326
GAS1-N40GS	FFYSNN[2.1162]GSQFYIR	1162	2	2.20928	204.087	7	b	1	26.8542							35.4413	13.0676	140.116	29.6211	37.5331	23.5681						37.2727					38.2755	66.0917			25.3876		36.7658
GAS1-N40GS	FFYSNN[2.1162]GSQFYIR	1162	2	2.20928	366.139	8	b	1	35.064	36.3502		39.0979		72.0234												35.9139	36.271				75.5617		37.5331
GAS1-N40GS	FFYSNN[17.1162]GSQFYIR	1162	2	16.7165	127.039	1	b	1					77.4002		28.7612						227.289	350.214	56.4322	246.109		628.567		126.304	49.0284	114.28	81.612					273.027	41.7486
GAS1-N40GS	FFYSNN[17.1162]GSQFYIR	1162	2	16.7165	138.055	2	b	1	1783.89	392.127	932.247				122.895	77.7438						1213.95	1075.07			1319.54			646.387	726.246		398.241		228.982		826.365	78.8074
GAS1-N40GS	FFYSNN[17.1162]GSQFYIR	1162	2	16.7165	145.049	3	b	1	676.025			267.929							274.734		23.679	554.342	110.674	50.5567		941.851		115.588		90.9909		37.2016		58.4841		432.153	463.473
GAS1-N40GS	FFYSNN[17.1162]GSQFYIR	1162	2	16.7165	163.06	4	b	1	731.075			569.833			99.5945				112.237			616.424	491.019			1462.84		24.2785		358.279	68.2028	249.571	37.5604			679.192	589.173
GAS1-N40GS	FFYSNN[17.1162]GSQFYIR	1162	2	16.7165	168.065	5	b	1	1384.78	620.738	426.377	71.4432	140.691		103.61	788.237			59.8477			367.774	292.35			446.056		257.757	421.389	248.808	281.64	623.892		277.056		262.98	327.3
GAS1-N40GS	FFYSNN[17.1162]GSQFYIR	1162	2	16.7165	186.076	6	b	1	328.3	178.655			435.991			434.981					257.64	178.897	184.966			289.468		289.172	339.716			194.546	106.576	252.871		199.014	235.991
GAS1-N40GS	FFYSNN[17.1162]GSQFYIR	1162	2	16.7165	204.087	7	b	1	502.558	72.6487					258.282						60.6887	621.014	696.487			2653.29		768.751	286.795	375.451		365.556		449.863		804.65	819.907
GAS1-N40GS	FFYSNN[17.1162]GSQFYIR	1162	2	16.7165	366.139	8	b	1		239.228	602.704		39.8576		93.3822							509.384	241.641	58.7875		1228.66		77.8855	894.267		280.143	447.675	33.0549			256.578	88.607
GAS1-N40GS	FFYSNN[20.1162]GSQFYIR	1162	2	19.5772	127.039	1	b	1	21.2097		189.698		93.7798		59.5923			149.589		151.81			47.0739		40.5097	108.266		81.0988	39.6708	73.8085	33.2336			37.3121	25.3349		111.192
GAS1-N40GS	FFYSNN[20.1162]GSQFYIR	1162	2	19.5772	138.055	2	b	1		102.108	31.3064		64.2176	116.254			49.8726	199.118			127.315		134.458	61.1927	294.163	56.8127		100.306		213.172		159.722			125.113	103.071	149.911
GAS1-N40GS	FFYSNN[20.1162]GSQFYIR	1162	2	19.5772	145.049	3	b	1	219.858	149.659			64.8811	195.648	6.25005	5.54567		37.4142	71.0268	10.7262	57.8457	235.865	17.9712		38.4974		48.723	27.9268	71.282		29.3193				6.30291	138.199	57.4304
GAS1-N40GS	FFYSNN[20.1162]GSQFYIR	1162	2	19.5772	163.06	4	b	1	120.277				149.026			183.276	108.929	225.028	105.27		89.4966	124.136	62.2864	58.8486	61.2502	385.196		269.778	35.6424		6.77501	134.652				98.5662	149.232
GAS1-N40GS	FFYSNN[20.1162]GSQFYIR	1162	2	19.5772	168.065	5	b	1	51.8703	70.2912	90.4899		91.3005	72.5636	75.0389	87.4837	77.4898		97.0556	16.4732	15.6385	28.3109	102.032	73.2216	18.2884	93.4893	74.5247	14.255	31.9437		43.0252		122.618	65.4086	133.825	34.3572
GAS1-N40GS	FFYSNN[20.1162]GSQFYIR	1162	2	19.5772	186.076	6	b	1	14.0698			312.545			28.049	29.6105	58.8319	200.615	64.686	59	27.5488	238.148	111.211		10.7321		69.5357			27.8883	124.453	29.4226	58.7212	8.86721		26.1975	41.8129
GAS1-N40GS	FFYSNN[20.1162]GSQFYIR	1162	2	19.5772	204.087	7	b	1	346.68		77.1919	74.0682		58.3636	32.4751	38.5437	175.271	47.9653				182.412	39.2779		241.991	382.98	184.005	14.5966	103.414	82.4106		265.277	27.7481	79.4317	137.988	55.6562	125.431
GAS1-N40GS	FFYSNN[20.1162]GSQFYIR	1162	2	19.5772	366.139	8	b	1	433.808	329.2	231.031	67.7686		108.151	117.205	26.4241	16.3369	46.3706	270.574		48.9082				30.7028	98.4571	92.6789		149.625			142.476	23.1895	177.832	310.802		258.372
GAS1-N40GS	FFYSNN[6.1162]GSQFYIR	1162	2	5.68376	127.039	1	b	1	75.0663	31.0522	66.496		50.1687	66.5201	45.0165		19.1807	37.4629	74.1285	35.9665		96.6854	31.0363	37.2357	14.9143		74.5889	181.1	110.05	108.396	66.4554		42.6986	188.285
GAS1-N40GS	FFYSNN[6.1162]GSQFYIR	1162	2	5.68376	138.055	2	b	1	36.0483	14.0756	26.9236	37.5091	14.0763			37.5328			37.2691							230.903	37.5308			40.8622		37.53	43.2568		38.2632
GAS1-N40GS	FFYSNN[6.1162]GSQFYIR	1162	2	5.68376	145.049	3	b	1			109.508			57.0049	94.4701	35.8781	20.0473	87.8428	39.2452		105.467	61.5152	40.3828	38.9524	59.6853		126.878	212.615		77.6882	112.6		37.5334	37.5297	175.408	70.7168
GAS1-N40GS	FFYSNN[6.1162]GSQFYIR	1162	2	5.68376	163.06	4	b	1			42.5874	52.0735	20.3179	28.232	75.6446		304.724	35.278			21.1956	57.2091	226.525	195.844	125.607	268.142	190.125	99.7917	97.9216	26.9251	260.514	34.5596	161.456	141.396	42.8842	73.8984	110.634	34.1481
GAS1-N40GS	FFYSNN[6.1162]GSQFYIR	1162	2	5.68376	168.065	5	b	1	37.5332		28.8995			6.13131			37.1638			35.184		37.3893	30.1001	10.9998					24.5219				36.8713			33.477
GAS1-N40GS	FFYSNN[6.1162]GSQFYIR	1162	2	5.68376	186.076	6	b	1								37.5076		35.5312							28.2731	37.5329			37.5301	37.5318					36.3487			53.199
GAS1-N40GS	FFYSNN[6.1162]GSQFYIR	1162	2	5.68376	204.087	7	b	1	35.6392		13.2098	74.8932	5.82442				73.6678					19.3925	25.1175	25.27	36.7684	19.0689	25.1089					32.459				75.0634
GAS1-N40GS	FFYSNN[6.1162]GSQFYIR	1162	2	5.68376	366.139	8	b	1		21.8885										37.3637						40.9506						37.5082					37.533
GAS1-N40GS	FFYSNN[29.1162]GSQFYIR	1162	2		127.039	1	b	1			30.3816	75.37										36.8709
GAS1-N40GS	FFYSNN[29.1162]GSQFYIR	1162	2		138.055	2	b	1																													31.0535	25.516
GAS1-N40GS	FFYSNN[29.1162]GSQFYIR	1162	2		145.049	3	b	1														35.1838						35.184
GAS1-N40GS	FFYSNN[29.1162]GSQFYIR	1162	2		163.06	4	b	1													36.8718
GAS1-N40GS	FFYSNN[29.1162]GSQFYIR	1162	2		168.065	5	b	1				36.872
GAS1-N40GS	FFYSNN[29.1162]GSQFYIR	1162	2		186.076	6	b	1																17.1283				8.41099										61.7716
GAS1-N40GS	FFYSNN[29.1162]GSQFYIR	1162	2		204.087	7	b	1										23.5682			10.7318																	30.3796
GAS1-N40GS	FFYSNN[29.1162]GSQFYIR	1162	2		366.139	8	b	1			37.5077							5.82343						36.8707													35.1842
GAS1-N40GS	FFYSNN[14.1162]GSQFYIR	1162	2	14.2495	127.039	1	b	1	5082.03	7139.32	3946.25	6741.02	1978.37	5021.65	3783.28	4116.84	2501.36	3793.2	2168.57	8203.59	1251.45	10313.5	3083.75	1631.48	7240.25	8184.17	2490.54	1490.95	1982.53	170.865		1867.52	560.945		2341.91	1488.21	2768.93
GAS1-N40GS	FFYSNN[14.1162]GSQFYIR	1162	2	14.2495	138.055	2	b	1	5641.47	6773.48	6714.18	10431.3	2471.18	4420.16	6193.89	3784.48	4989.12	4479.24	2140.64	10367	2708.98	14206.1	4617.87	4542.58	11671	10931.1	3149.83	3218.1	4356.65	1603.55	1781.57	3047.07	1252.07		2938.29	2493.38	2477.25
GAS1-N40GS	FFYSNN[14.1162]GSQFYIR	1162	2	14.2495	145.049	3	b	1	8256.23	6581.73	11491.9	11843.2	5250.18	2707.75	7030.55	5286.92	5461.67	7839.5	3387.78	13753.4	2222.3	16812.5	4987.31	4513.47	16802.4	6346.2	6430.64	3976.86	4824.18	1306.99		4057.69	1439.29		3636.09	2714.32	4020.27
GAS1-N40GS	FFYSNN[14.1162]GSQFYIR	1162	2	14.2495	163.06	4	b	1	16239.3	18029	18833.5	21033.5	6804.61	7759.06	13047.8	10471	13595.6	12719.3	6156.98	22025.5	8116.07	19499.2	14360.6	8536.28	25421.7	10054.3	10277.9	5869.76	8874.67		1108.39	3464.92	1952.72		6176.49	1440.42	8357.64
GAS1-N40GS	FFYSNN[14.1162]GSQFYIR	1162	2	14.2495	168.065	5	b	1	4856.79	2905.79	2358.47	3912.2	1036.31	2935.32	2451.78	3967.25	2930.57	3656.33	2691.81	4080.13	1936.2	8171.23	1903.04	2077.57	8919.95	7074.26	2387.74	1743.97	2925.55	826.412	294.498	2366.68	258.221		1905.03	1550.78	1830.73
GAS1-N40GS	FFYSNN[14.1162]GSQFYIR	1162	2	14.2495	186.076	6	b	1	4155.16	3613.38	2826.79	2813.59		1696.69	2571.12	2666.54	2228.72	2353.21	598.204	3234.5	1721.22	5107.95	875.012	877.641	4796.46	2075.19	1945.44	832.106	1621.12	471.578	603.693	1490.23	253.374		1352.5	722.324	1836.24
GAS1-N40GS	FFYSNN[14.1162]GSQFYIR	1162	2	14.2495	204.087	7	b	1	16766	11729.8	14509.8	16488.7	2156.67	7033.36	7005.23	12291.6	10747.3	7687.26	6218.1	14843.1	6117.55	16237.7	7125.02	5715.7	24739.1	23252	7140.83	5028.3	7651.19	731.353	1183.15	3541.33	1573.29		3504.98	5351.62	5365.66
GAS1-N40GS	FFYSNN[14.1162]GSQFYIR	1162	2	14.2495	366.139	8	b	1	6650.44	3594.56	3634.69	5883.04	630.362	2746.09	2599.31	3372.41	2842.29	3759.88	1281.78	5310.42	1213	6332.02	3649.17	1270.18	6548.1	6567.89	2047.43	1013.73	2675.67	467.353	601.616	1598.16	1341.33		4351.58	1524.98	1373.23
GAS1-N40GS	FFYSNN[3.1162]GSQFYIR	1162	2	2.6781	127.039	1	b	1	31.3278					15.3848	150.134		39.6782		39.2541	23.5681	30.0038	34.7439	26.5033		37.3892			67.8749				37.5315				6.69242		51.8449
GAS1-N40GS	FFYSNN[3.1162]GSQFYIR	1162	2	2.6781	138.055	2	b	1	19.1674	27.7268	17.5039			64.0056	36.953	37.2665	107.048	37.5284	34.7458			68.6681	75.5004			38.7892				29.5958	30.9877		37.5299			74.7308
GAS1-N40GS	FFYSNN[3.1162]GSQFYIR	1162	2	2.6781	145.049	3	b	1		11.4769		23.5692	163.666		34.1555				32.4865		27.4993		36.8714			25.6782		36.4818		39.2537	37.5336				63.922		28.7601	86.6024
GAS1-N40GS	FFYSNN[3.1162]GSQFYIR	1162	2	2.6781	163.06	4	b	1			104.066	18.7075	187.632	29.7854	25.0657	74.7237		83.3019	97.0744		71.6632		30.951	17.3744					37.4051		34.7437	37.6595	35.5991		37.5334	6.01063	52.5787	34.7457
GAS1-N40GS	FFYSNN[3.1162]GSQFYIR	1162	2	2.6781	168.065	5	b	1		17.8059		31.0535	36.3504	10.8429		36.3492					31.7124		31.0535	37.5353	37.5275					37.5327								33.4761
GAS1-N40GS	FFYSNN[3.1162]GSQFYIR	1162	2	2.6781	186.076	6	b	1		22.2491										23.5681		37.3704					9.34093		37.533
GAS1-N40GS	FFYSNN[3.1162]GSQFYIR	1162	2	2.6781	204.087	7	b	1	46.1044				20.4541	111.879	63.93	25.3765		45.6413		23.5681	36.3478					35.9706	37.5091	37.2684				31.3294	37.5299				37.5345	36.6063
GAS1-N40GS	FFYSNN[3.1162]GSQFYIR	1162	2	2.6781	366.139	8	b	1	35.0822			28.7364	37.5328				72.1186							37.534			36.2478	37.5338			81.7893					37.2701		37.5093
GAS1-N40GS	FFYSNN[4.1162]GSQFYIR	1162	2	3.66789	127.039	1	b	1		34.0211		41.4477		27.8496		23.5681	12.6155		36.8706						74.883	23.4055	41.018	27.7718			74.7787					112.544		37.4891
GAS1-N40GS	FFYSNN[4.1162]GSQFYIR	1162	2	3.66789	138.055	2	b	1		17.7007	50.4774	109.413		16.8205	34.5385	53.7895	37.5068		23.2969	24.4148		68.1154	112.249			38.4725				52.6771			37.5086
GAS1-N40GS	FFYSNN[4.1162]GSQFYIR	1162	2	3.66789	145.049	3	b	1							73.7998	11.6845		37.4257	34.5422	37.5329			37.5336			53.1302		36.5365			28.6868				36.2472		36.7024
GAS1-N40GS	FFYSNN[4.1162]GSQFYIR	1162	2	3.66789	163.06	4	b	1	29.836			28.9379	70.3676	27.6096	83.5982	28.1507		36.239	72.2713		122.61		29.7494	30.0334	36.7687				35.1841		29.2366		36.8717			74.6366	47.0885	146.069
GAS1-N40GS	FFYSNN[4.1162]GSQFYIR	1162	2	3.66789	168.065	5	b	1	37.2135		38.5686	71.9228	44.0565	6.1314		14.0753		29.6732																				28.5965
GAS1-N40GS	FFYSNN[4.1162]GSQFYIR	1162	2	3.66789	186.076	6	b	1	26.8714				35.1838									37.5342		35.1834					37.3887	37.5353		37.534
GAS1-N40GS	FFYSNN[4.1162]GSQFYIR	1162	2	3.66789	204.087	7	b	1		70.892				109.67			31.2541					26.5957	23.4205			20.1713	20.4512	37.1761		98.5511	71.0902		36.3457		75.0679	31.1724	23.5691	74.8658
GAS1-N40GS	FFYSNN[4.1162]GSQFYIR	1162	2	3.66789	366.139	8	b	1			37.5307					14.0753					37.5333			31.0531		37.5332						37.5282				37.3934
GAS1-N40GS	FFYSNN[15.1162]GSQFYIR	1162	2		127.039	1	b	1		4828.47	5072.27	5557.12	10608.8	10358.1	3746.76	3648.36	3255.77	4735.22	3034.25	8690.66	6985.64	7862.37	4024.25	2047.48	8626.73		2718.71	1610.1	2499.86				360.604	1472.42	1213.06	1633.07	3484.91
GAS1-N40GS	FFYSNN[15.1162]GSQFYIR	1162	2		138.055	2	b	1		5589.86	7354.98	7991.57	13871.6	16334.4	6848.27	5518.11	4561.6	5401.75	2091.99	10191.6	12087.2	11418	5545.44	3060.71	13328.7	8236.71	3645.07	2956.85	6050.13				762.268	444.289	837.008	1819.08	4192.64
GAS1-N40GS	FFYSNN[15.1162]GSQFYIR	1162	2		145.049	3	b	1		8211	7568.75	10604.4	17371.2	19397.4	8267.87	7591.72	6256.82	7933.51	3920.59	14196.8	16382.4	13977.8	5515.38	4880.81	16530.1	6481.26	7295.04	4538.68	5312.2				1021.9	2916.48	1221.73	3079.67	5037.93
GAS1-N40GS	FFYSNN[15.1162]GSQFYIR	1162	2		163.06	4	b	1		17263	14616.4	20791.4	31383.3	33946.2	13366.9	13736	10470.3	12838.5	6518.39	23740.4	29731.2	24205.3	10134	9223.34	30158.7	11727.6	10786.2	6437.96	10507.4				1965.46	4242.91	5221.24	3750.58	11000.4
GAS1-N40GS	FFYSNN[15.1162]GSQFYIR	1162	2		168.065	5	b	1		2788.67	3413.62	4766.15	9341.94	9608.78	3291.88	3704.15	2469.05	3998.26	2227.97	6802.54	6572.97	6556.75	1175.34	1242.72	8575.18	5647.06	2967.94	2131.6	3623.7				231.553	1997.47	1813.01	389.771	2323.75
GAS1-N40GS	FFYSNN[15.1162]GSQFYIR	1162	2		186.076	6	b	1		1702.33	1739.95	2392.41	6080.74	4641.56	1602.53	1567.63	2090.56	2527.27	830.715	3534.34	4350.26	4219.07	624.401	937.16	4437.13	1945.85	2090.98	1145.91	1384.72				286.472	410.772	1001.56	211.648	1814.17
GAS1-N40GS	FFYSNN[15.1162]GSQFYIR	1162	2		204.087	7	b	1		10356.5	10515.6	15882.1	25991.8	30528.5	7941.91	12307.2	8436.62	8956.77	7712.51	18870.3	23142.3	19863.1	9658.72	7340.39	24278.7	18209.7	10057.6	5675.31	10020.7				1181.45	2028.83	2690.66	1844.19	7164.01
GAS1-N40GS	FFYSNN[15.1162]GSQFYIR	1162	2		366.139	8	b	1		3086.03	3444.72	5696.38	7220.31	9404	2335.23	5296.51	3267.4	2653.18	2133.85	6933.65	7340.59	8852	3500.56	2078.89	7881.01	6263.8	2393.98	1432.7	2636.77				406.828	1778.01	1116.2	1942.25	2189.57
GAS1-N40GS	FFYSNN[5.1162]GSQFYIR	1162	2	5.68125	127.039	1	b	1	73.742	31.1603	66.2904	37.5358		7.5987	39.4748	37.529	33.9225	34.0444		42.6575	122.071	29.6645	33.8462	28.3148	14.9143	36.6568		167.263	20.3979	88.6622	24.1329		70.0719	177.146			39.2091
GAS1-N40GS	FFYSNN[5.1162]GSQFYIR	1162	2	5.68125	138.055	2	b	1	36.871	122.054	26.8417		181.849			76.5217			74.7354					38.8128		31.0515	37.5313		37.5342	49.6813		29.9884			30.114
GAS1-N40GS	FFYSNN[5.1162]GSQFYIR	1162	2	5.68125	145.049	3	b	1		52.412	104.153	66.3082		75.6851	77.047	25.3903	22.7773	144.518				112.501	33.2292		74.0807	65.2424		205.801	56.3873	66.0928	24.0424		37.3888	37.5297	145.994		108.866	34.3749
GAS1-N40GS	FFYSNN[5.1162]GSQFYIR	1162	2	5.68125	163.06	4	b	1			45.3061		74.121			71.6548	244.15	30.2781	33.423		159.514	48.4568			128.143			95.5889		26.9251		23.0213	435.745	143.018	55.1476	18.0452	28.0827	37.5112
GAS1-N40GS	FFYSNN[5.1162]GSQFYIR	1162	2	5.68125	168.065	5	b	1	36.871	37.5335	21.1947	47.1323	76.4419	36.7686		37.5327	41.0149			37.5339	75.1261		32.9225	38.0485					78.5431				37.5334			33.3893
GAS1-N40GS	FFYSNN[5.1162]GSQFYIR	1162	2	5.68125	186.076	6	b	1					37.5337		38.1918			39.0989	6.40745	37.5337	75.0656			36.8482	28.4411	14.0752				37.5318	37.5336				37.3876	37.533		53.5364
GAS1-N40GS	FFYSNN[5.1162]GSQFYIR	1162	2	5.68125	204.087	7	b	1	10.7096		12.9574						77.5966	26.9244	117.119		170.737	71.756	21.6445		37.2681	34.8469	73.4577					15.8042
GAS1-N40GS	FFYSNN[5.1162]GSQFYIR	1162	2	5.68125	366.139	8	b	1						75.0651		37.5327				33.4777		37.5332	56.0538			36.871	37.5329				75.0672	37.4925
GAS1-N40GS	FFYSNN[1.1162]GSQFYIR	1162	2	0.847672	127.039	1	b	1			23.5687		75.0431													37.5347			75.8343			41.104	35.1832					73.2519
GAS1-N40GS	FFYSNN[1.1162]GSQFYIR	1162	2	0.847672	138.055	2	b	1		34.8626		29.6745	37.5338	37.4166	30.9817	28.8441	16.4972	32.3183	36.3507	37.5335			28.9041		23.5795		27.4083	11.2418					37.724			15.8745		28.7004
GAS1-N40GS	FFYSNN[1.1162]GSQFYIR	1162	2	0.847672	145.049	3	b	1		75.0649	31.0528	29.9167		175.725		37.533	23.5673	23.4418	74.198	37.3523		26.7822	52.6008	37.4891					37.4279		35.1836		36.8705	20.3988	111.623	37.5318	5.82404	37.3689
GAS1-N40GS	FFYSNN[1.1162]GSQFYIR	1162	2	0.847672	163.06	4	b	1				36.6532	57.7599	23.1213	31.0416	28.7617			37.27		8.42708	110.457			5.11923		38.1694		32.4373	112.285	37.2039			21.1003	71.7143	68.7295	14.075	10.9505
GAS1-N40GS	FFYSNN[1.1162]GSQFYIR	1162	2	0.847672	168.065	5	b	1	34.0404					25.1083			23.5673						47.8434	75.068				74.8908		16.8152			17.906	37.5338			23.5687
GAS1-N40GS	FFYSNN[1.1162]GSQFYIR	1162	2	0.847672	186.076	6	b	1	37.5361	37.5328			34.7442		35.1832		28.7346					37.5326				37.5076						35.4501		37.5324
GAS1-N40GS	FFYSNN[1.1162]GSQFYIR	1162	2	0.847672	204.087	7	b	1	37.4379	37.4869	37.1984	29.6746			21.971		93.4082	109.507			69.9779		41.0158		34.5489		35.6985		36.4459	73.7763	37.3885			37.5278				29.6742
GAS1-N40GS	FFYSNN[1.1162]GSQFYIR	1162	2	0.847672	366.139	8	b	1						75.0367														37.3889							36.8721
GAS1-N40GS	FFYSNN[28.1162]GSQFYIR	1162	2	27.2415	127.039	1	b	1			30.3998	78.4253
GAS1-N40GS	FFYSNN[28.1162]GSQFYIR	1162	2	27.2415	138.055	2	b	1					22.5345																								37.534	21.911
GAS1-N40GS	FFYSNN[28.1162]GSQFYIR	1162	2	27.2415	145.049	3	b	1					15.923		12.5136				36.8719			5.69037				37.3918		37.5338										74.2988
GAS1-N40GS	FFYSNN[28.1162]GSQFYIR	1162	2	27.2415	163.06	4	b	1										37.3886			36.8718					29.2224
GAS1-N40GS	FFYSNN[28.1162]GSQFYIR	1162	2	27.2415	168.065	5	b	1	23.5812			37.371		33.8153
GAS1-N40GS	FFYSNN[28.1162]GSQFYIR	1162	2	27.2415	186.076	6	b	1	35.195															17.1283		37.511		13.3244
GAS1-N40GS	FFYSNN[28.1162]GSQFYIR	1162	2	27.2415	204.087	7	b	1		72.2457								37.5086	35.5982		10.7311	90.3691																109.542
GAS1-N40GS	FFYSNN[28.1162]GSQFYIR	1162	2	27.2415	366.139	8	b	1		31.0535	37.4969			39.8568	37.5331							64.193		36.8707													37.5341
GAS1-N40GS	FFYSNN[24.1162]GSQFYIR	1162	2	24.3912	127.039	1	b	1			96.0824	71.1181	26.7407	69.0264		80.8431	37.3042			159.796	20.4455				74.6291			31.5391	32.4233			37.5336	36.335		71.8362			45.0089
GAS1-N40GS	FFYSNN[24.1162]GSQFYIR	1162	2	24.3912	138.055	2	b	1			42.1234	22.2562	146.51	53.1675	47.3362		312.895	48.6405			70.73	14.8727	27.8272	42.0807		24.8323	36.9948	96.4993	61.1598	33.8156		30.9971		155.754	41.4548	88.4661
GAS1-N40GS	FFYSNN[24.1162]GSQFYIR	1162	2	24.3912	145.049	3	b	1	2.63942		196.784	96.4258	22.4142		52.6108		34.567	50.4547	111.226	29.633		26.2901	19.4322		171.142	117.034	8.39574	19.4051		37.5088	150.127	74.0769	35.1831	37.2222	87.1194	33.0296
GAS1-N40GS	FFYSNN[24.1162]GSQFYIR	1162	2	24.3912	163.06	4	b	1	36.7253				112.477	9.05902	4.12123	77.7876		24.9568	154.145	62.5922	188.77		137.116	29.6719		191.741		36.3509	11.9063	29.7996		59.4947	30.8372	124.004		69.4966	104.309
GAS1-N40GS	FFYSNN[24.1162]GSQFYIR	1162	2	24.3912	168.065	5	b	1				40.26				71.4513	37.5346						29.6754			103.788	26.9228	67.6235	28.2046		38.2383				138.767
GAS1-N40GS	FFYSNN[24.1162]GSQFYIR	1162	2	24.3912	186.076	6	b	1	56.7177	35.0501	109.358	74.3543	160.484				36.8997			110.503		106.34		110.964	35.748	33.8053	35.1507		21.6118	21.2322	82.0691	36.0919			86.3712		37.5966
GAS1-N40GS	FFYSNN[24.1162]GSQFYIR	1162	2	24.3912	204.087	7	b	1	93.9039	17.6459	257.027	105.593		54.1233	191.769		182.205		151.182	203.208	85.1303	18.3247		80.9484		295.539			187.586	75.7332	77.6685			51.5671	251.637	37.2131	31.3055
GAS1-N40GS	FFYSNN[24.1162]GSQFYIR	1162	2	24.3912	366.139	8	b	1		26.5017			117.379	59.2494		133.847	109.412	113.736	101.762		66.6169	20.5781		70.4543	72.1169	67.798	20.6755	66.3201		74.2743	210.581	115.339	36.8713		126.744		37.534	103.202
GAS1-N40GS	FFYSNN[11.1162]GSQFYIR	1162	2	11.1609	127.039	1	b	1	50.9798	294.508													703.305							13528.9	13877.6	6599.97	1136.31	7521.23	4622.8	4753.12	2712.44
GAS1-N40GS	FFYSNN[11.1162]GSQFYIR	1162	2	11.1609	138.055	2	b	1		312.837													712.502							19248.8	22878.8	8433.52		11993.2	6669.49	6546.07	3489.22
GAS1-N40GS	FFYSNN[11.1162]GSQFYIR	1162	2	11.1609	145.049	3	b	1	351.701	110.345													610.216							25457.6	26326.5	13510.2	2492.21	13940.2	8567.29	8158.77	4043.25
GAS1-N40GS	FFYSNN[11.1162]GSQFYIR	1162	2	11.1609	163.06	4	b	1		466.709		222.514											1001.93							33644.9	37726.4	18597.2		16204.2	10917.6	11106	4716.06
GAS1-N40GS	FFYSNN[11.1162]GSQFYIR	1162	2	11.1609	168.065	5	b	1	232.288			305.55											495.512							13582.4	15751.3	6761.07	2099.49	8174.23	5522.55	4785.79	2636.55
GAS1-N40GS	FFYSNN[11.1162]GSQFYIR	1162	2	11.1609	186.076	6	b	1	1001.91	1638.27		415.014											174.448							5884.91	7723.46	3182.29		3110.06	2225.49	2488.45	775.182
GAS1-N40GS	FFYSNN[11.1162]GSQFYIR	1162	2	11.1609	204.087	7	b	1	495.452	683.151		418.55											1136.2							29317.6	32790.9	14477		17750.4	11745.9	11096.2	5903.41
GAS1-N40GS	FFYSNN[11.1162]GSQFYIR	1162	2	11.1609	366.139	8	b	1	1259.56	43.9108		175.793											322.729							11016.4	12606.1	5435.77	171.478	5666.79	4446.96	2562.75	1680.95
GAS1-N40GS	FFYSNN[25.1162]GSQFYIR	1162	2	24.4081	127.039	1	b	1					7.72691	23.5687											37.5083		37.5326						37.2692	37.5335	61.4728
GAS1-N40GS	FFYSNN[25.1162]GSQFYIR	1162	2	24.4081	138.055	2	b	1			38.4526					31.0526	33.0239	20.4519			55.9236	13.9449	31.7278		36.8709	75.0672	75.016	37.5336	41.7022	37.5345				37.5218	31.0527	35.1833		10.5839
GAS1-N40GS	FFYSNN[25.1162]GSQFYIR	1162	2	24.4081	145.049	3	b	1	35.4531		129.862		32.8836				37.4416	16.4413	97.1964		99.0747	25.2454	26.3239	23.5694	24.765							26.4869	36.7672				37.5333
GAS1-N40GS	FFYSNN[25.1162]GSQFYIR	1162	2	24.4081	163.06	4	b	1	35.417		36.3494	37.5049	37.2257	15.2429	75.8486			70.0529	134.771		109.045		149.71	55.9936								13.9951	31.6984	75.015
GAS1-N40GS	FFYSNN[25.1162]GSQFYIR	1162	2	24.4081	168.065	5	b	1				37.5319								58.3424			37.5097						31.0529						24.2181	38.1951
GAS1-N40GS	FFYSNN[25.1162]GSQFYIR	1162	2	24.4081	186.076	6	b	1	27.6588	35.3343	35.8901			24.2197		24.655						110.522					37.536		59.3647								37.53
GAS1-N40GS	FFYSNN[25.1162]GSQFYIR	1162	2	24.4081	204.087	7	b	1	135.215	36.8575	53.6367	111.268		6.41255			68.7471		81.8103	43.4952	151.77	18.322		31.0538		73.2225		36.2301		35.0985					56.4287			33.3548
GAS1-N40GS	FFYSNN[25.1162]GSQFYIR	1162	2	24.4081	366.139	8	b	1		29.6735	31.1398		78.9348	62.1045	62.69	29.958			111.721			25.3178				37.5346			31.0529			37.3341	37.5328		88.3647	149.015	35.5497
GAS1-N40GS	FFYSNN[19.1162]GSQFYIR	1162	2	19.0022	127.039	1	b	1	109.326	85.8648	18.984		135.61	286.648		90.4344	70.0943	34.0528		24.9754				24.2956		51.0811		112.506			170.023	11.6566	65.6626	37.319	48.0201
GAS1-N40GS	FFYSNN[19.1162]GSQFYIR	1162	2	19.0022	138.055	2	b	1	60.682	164.851	250.484	179.387		242.145		141.462	149.522		6.84578	57.219	162.672	125.937	183.459		286.758	123.75		201.979		60.6667		165.469	153.671	13.2952		17.5074	109.715
GAS1-N40GS	FFYSNN[19.1162]GSQFYIR	1162	2	19.0022	145.049	3	b	1	137.553	134.009	23.9224	132.743		175.208	42.1871	33.3726	85.4617	90.7743		156.652		213.482	330.247	59.6756		42.4101	39.7594	90.8319	67.7512	180.079	15.0341		75.0371	26.2209			42.4945
GAS1-N40GS	FFYSNN[19.1162]GSQFYIR	1162	2	19.0022	163.06	4	b	1			32.3113	184.541	227.936	777.026			115.427	57.4649	30.5058	76.7929	133.9	64.8971		86.0618	53.5484			64.5773	18.3469	113.845	200.404		69.3801	52.4126		14.0554
GAS1-N40GS	FFYSNN[19.1162]GSQFYIR	1162	2	19.0022	168.065	5	b	1	36.3484	144.746	83.6152					54.1447	59.7447		43.7918	78.9831		38.7247		65.9358		132.918	88.2511	287.313	22.8789	56.5897	22.6949		13.3882	24.7188	45.7721	23.2948
GAS1-N40GS	FFYSNN[19.1162]GSQFYIR	1162	2	19.0022	186.076	6	b	1	117.204	22.0208	239.803	154.731	171.69	32.6943	51.0896	27.2393	105.237	112.142			28.2665	68.2975		26.9218	95.8004	186.866	143.666	149.766		124.837	94.6725	49.031		34.8066	17.4979		47.8613
GAS1-N40GS	FFYSNN[19.1162]GSQFYIR	1162	2	19.0022	204.087	7	b	1			420.224		62.2866	84.9131	183.877	87.6173		295.139		33.5432			54.6946	174.602		208.029	63.4806		95.7685	248.31	454.55	58.1374	80.347	159.351		45.6764	74.4899
GAS1-N40GS	FFYSNN[19.1162]GSQFYIR	1162	2	19.0022	366.139	8	b	1	82.8293	352.698	77.7151		41.1611	129.808	101.303	45.2091		174.583	152.54		39.6921	57.4784	210.425	84.8956	66.2552			120.662	105.87		184.364	164.551	64.4707	72.8555	46.1854	26.4881	27.2495
GAS1-N40GS	FFYSNN[21.1162]GSQFYIR	1162	2	21.2586	127.039	1	b	1	153.12		124.958			73.3023	16.7346		33.8551		18.8503		45.8442		23.7443	49.6562	48.9913			29.0753			40.9445	36.3482	23.5636		29.5223	49.5045		175.89
GAS1-N40GS	FFYSNN[21.1162]GSQFYIR	1162	2	21.2586	138.055	2	b	1	51.616	92.4071		88.8326	183.652	115.48	181.411	34.224				91.0198	118.266	224.905			170.719	73.9123			84.6122	37.3615	155.681	56.6184	87.3666	13.0224	51.2414
GAS1-N40GS	FFYSNN[21.1162]GSQFYIR	1162	2	21.2586	145.049	3	b	1		31.9102		149.078	79.9815		67.9668	55.2453		74.9874			136.957	143.269			70.9337	163.966	65.545	35.1837	76.6248	18.0857	35.0425	31.4163		55.2581	43.3736	105.175	35.4709	714.692
GAS1-N40GS	FFYSNN[21.1162]GSQFYIR	1162	2	21.2586	163.06	4	b	1	75.3017		92.3962	114.669		102.775	45.042	62.9305	47.0111	56.591	12.7094	50.6763	93.8597		103.971	74.8246	133.706	122.212	92.0488		112.606		57.3301	9.95493		93.1017	146.587		121.763	783.358
GAS1-N40GS	FFYSNN[21.1162]GSQFYIR	1162	2	21.2586	168.065	5	b	1	95.9166	36.8753	82.1417		45.8496	63.2036		160.801	45.7561	36.7986			40.4772		39.2961	71.3106	45.1052					49.0149	26.9141	34.7607	16.6634	33.3437	122.89		33.4871	434.769
GAS1-N40GS	FFYSNN[21.1162]GSQFYIR	1162	2	21.2586	186.076	6	b	1		74.5928	191.266	53.7185	306.745	86.7348	53.6621		181.263	64.1115	46.711	224.623	52.2955	105.612	89.1258	24.1109		146.24	128.382		33.826	92.7033	36.0721		20.4526	49.8555			100.47	87.1237
GAS1-N40GS	FFYSNN[21.1162]GSQFYIR	1162	2	21.2586	204.087	7	b	1	100.993	294.346	343.512		14.7347		7.82122	106.966	84.7146	284.669		187.105	144.833		59.5656	25.5468		249	33.3119	24.4148	32.8155	68.9008		222.237	38.46	14.5665	27.2696		77.7415	286.305
GAS1-N40GS	FFYSNN[21.1162]GSQFYIR	1162	2	21.2586	366.139	8	b	1	27.2019	581.126	274.429	17.4386	81.2884	67.1283	29.6349	285.496	190.211	289.854		23.4556	290.888	207.959			58.9841	108.911	293.117	16.5062	48.782			14.3292	29.9715		227.276	11.5506	88.8413	276.564
GAS1-N40GS	FFYSNN[30.1162]GSQFYIR	1162	2		127.039	1	b	1
GAS1-N40GS	FFYSNN[30.1162]GSQFYIR	1162	2		138.055	2	b	1
GAS1-N40GS	FFYSNN[30.1162]GSQFYIR	1162	2		145.049	3	b	1
GAS1-N40GS	FFYSNN[30.1162]GSQFYIR	1162	2		163.06	4	b	1
GAS1-N40GS	FFYSNN[30.1162]GSQFYIR	1162	2		168.065	5	b	1
GAS1-N40GS	FFYSNN[30.1162]GSQFYIR	1162	2		186.076	6	b	1
GAS1-N40GS	FFYSNN[30.1162]GSQFYIR	1162	2		204.087	7	b	1
GAS1-N40GS	FFYSNN[30.1162]GSQFYIR	1162	2		366.139	8	b	1
GAS1-N40GS	FFYSNN[10.1162]GSQFYIR	1162	2	10.1174	127.039	1	b	1	665.105	927.283	818.445	2233.26	1252.07		1088.59	421.896	642.041	471.793	956.595	903.57	3328.36	3212.37	964.594	1282.35	2932.37	1646.55	2211.59	225.957	1636.06	23884.3	29560	9333.28	1407.73	11624.3	9389.89	6868.98	5358.59
GAS1-N40GS	FFYSNN[10.1162]GSQFYIR	1162	2	10.1174	138.055	2	b	1	797.724	434.827	464.408	4602.36	74.5834		1501.88	691.136	443.394		813.463	1089.2	5769.27	2118.35		2200.2	4685.21	2208.67	1945.76		1746	36287	44766.6	13047.2		17238.4	14029	11341.3	8746.16
GAS1-N40GS	FFYSNN[10.1162]GSQFYIR	1162	2	10.1174	145.049	3	b	1	1931.01	401.219	1270.26	3404.88	671.122	907.646	2178.51	1789.27	582.385		1796.35	996.698	5826.54	3442.32	1427.45	1170.15	5361.73	1375.97	1605.3	1032.75	1077.18	45871.8	53350.9	18470.7	875.157	20495.7	16541.2	12810	9465.45
GAS1-N40GS	FFYSNN[10.1162]GSQFYIR	1162	2	10.1174	163.06	4	b	1	766.932	1021.27	1649.41	6326.25	529.105	762.367	1605.01	803.996	832.505		2158.26	1187.47	8052.59	4276.71	516.269	3714.18	6844.73	3026.67	3121.8	1091.36	2797.85	62911.2	74172.4	26790.3		24858.4	22826.6	16372.5	10910.8
GAS1-N40GS	FFYSNN[10.1162]GSQFYIR	1162	2	10.1174	168.065	5	b	1	564.086	120.67	391.077	2890.75		48.8905	1389.5	389.754	146.377		539.309	770.089	4417.94	2242.03		1286.5	3120.47	967.481	1214.67		558.554	24796.5	30282.6	10409.7	1169.51	13402.1	11675.7	8316.72	5983.39
GAS1-N40GS	FFYSNN[10.1162]GSQFYIR	1162	2	10.1174	186.076	6	b	1	232.512		222.866	912.056			391.878	347.172	67.7293	156.481		435.254	1490.47	951.39		826.255	1208.94	1150.97	833.602	26.1569	280.372	11251.5	14173.2	4299.98		5120.28	4441.37	4319.16	2605.72
GAS1-N40GS	FFYSNN[10.1162]GSQFYIR	1162	2	10.1174	204.087	7	b	1	691.364	577.4	1211.65	5418.23			2337.88	1161.31	676.381	57.1851	2119.19	1454.56	10298.9	4888.03	73.2	2843.66	5926.3	2372.87	3820.72		1750.58	53295.4	63995.8	23454.9		27083.1	23081.9	18122.6	12571.6
GAS1-N40GS	FFYSNN[10.1162]GSQFYIR	1162	2	10.1174	366.139	8	b	1	258.191	198.497	270.501	2864.44			551.572	384.845	44.5258		538.149	820.491	2910.21	1168.2		1724.79	3076.05	1238.22	1279.35		494.22	20409.1	24424.2	7617.85	500.52	9094.09	9609.59	4711.8	3835.95
GAS1-N40GS	FFYSNN[19.1137]GSQFYIR	1137	2	18.3883	127.039	1	b	1	74.1923	57.8073	23.9555	107.033				102.249	17.3263			40.8716	157.842			96.3074	106.725	26.3374	8.32435		14.4272	37.531			69.2929	26.2555	104.473	22.4647	119.533
GAS1-N40GS	FFYSNN[19.1137]GSQFYIR	1137	2	18.3883	138.055	2	b	1	119.008	124.31			107.013			290.846	23.4138	69.4178		100.138			36.909				49.811	35.7652	178.037	240.919			7.29139	16.7636	200.651	43.0005	125.727
GAS1-N40GS	FFYSNN[19.1137]GSQFYIR	1137	2	18.3883	145.049	3	b	1	169.053	81.4006		19.8536	10.3668	117.597	81.8139	93.4248	19.1759		17.7583	75.9231				71.8906	181.944		73.8672	112.589	49.1587	100.427	88.2722	29.2879		33.0063	63.7523
GAS1-N40GS	FFYSNN[19.1137]GSQFYIR	1137	2	18.3883	163.06	4	b	1		403.689	185.655	132.908	106.179	108.336			183.425	171.33	93.3573	60.2823	278.742				64.8912	69.8313		41.4854	175.673		190.454	218.477		68.9175			63.2018
GAS1-N40GS	FFYSNN[19.1137]GSQFYIR	1137	2	18.3883	168.065	5	b	1	357.692	13.2942	24.2379			217.189	61.7407	66.8161		188.841	84.5307	76.1253	29.5915			260.517			28.6372		59.4758	63.4148			55.7404	16.4968	80.3996	54.5909
GAS1-N40GS	FFYSNN[19.1137]GSQFYIR	1137	2	18.3883	186.076	6	b	1	85.3225	121.247	184.861	358.863			128.191	121.508	87.056	16.5383	126.976	110.38	205.974	92.5575	19.8046	14.0285		219.491	214.394		92.2681	32.8239			23.1155			60.8703	14.077
GAS1-N40GS	FFYSNN[19.1137]GSQFYIR	1137	2	18.3883	204.087	7	b	1				77.2446		111.262	143.921	201.346	44.7867	129.796		303.209	229.369	170.778		42.0868			176.333			103.282	52.3989	36.101		65.8334		76.96	162.009
GAS1-N40GS	FFYSNN[19.1137]GSQFYIR	1137	2	18.3883	366.139	8	b	1	123.658	95.5789		422.913			117.891	160.698	124.71		82.6007			99.8686	97.184		32.1785			194.928	196.753		149.525	127.338	38.6369		4.67165	125.029
GAS1-N40GS	FFYSNN[4.1137]GSQFYIR	1137	2	3.4591	127.039	1	b	1						3.59385		5.23722				70.0526	153.878		33.6422	37.5085	35.1488	47.2843			19.0678	31.0518	72.0501				37.4884	59.6804
GAS1-N40GS	FFYSNN[4.1137]GSQFYIR	1137	2	3.4591	138.055	2	b	1	33.5308	75.0415					74.1808	46.0787	42.3783	75.021		25.4534		17.3797			4.46963		75.0633	37.5332			59.4966	14.6003			34.5265			36.3502
GAS1-N40GS	FFYSNN[4.1137]GSQFYIR	1137	2	3.4591	145.049	3	b	1	29.6737	33.0433	74.2734	33.4763	30.7889		35.7653		6.18394	20.4539			40.1851	14.0769		8.69218					40.1654				37.5332	38.204	37.5098		30.982	37.5345
GAS1-N40GS	FFYSNN[4.1137]GSQFYIR	1137	2	3.4591	163.06	4	b	1		73.0554	75.0634		74.902	5.82455	12.373	37.5331					34.542	26.8896		36.5881		14.0761	37.5106	29.673	35.1838			32.1878	33.257	17.9432		68.7806	76.8134
GAS1-N40GS	FFYSNN[4.1137]GSQFYIR	1137	2	3.4591	168.065	5	b	1			37.5304		37.5341				26.8591					5.82612				36.871	37.5314					36.7683	37.5332
GAS1-N40GS	FFYSNN[4.1137]GSQFYIR	1137	2	3.4591	186.076	6	b	1						23.5692		37.0378							36.3494				20.4542		36.8713	35.1833	37.5094						16.6167
GAS1-N40GS	FFYSNN[4.1137]GSQFYIR	1137	2	3.4591	204.087	7	b	1	36.35	33.8822	35.2268	52.9139	37.4078	100.186	25.9891	41.0194		32.2394	34.6876		29.237		37.5326	36.8584	35.1835					35.1833								27.732
GAS1-N40GS	FFYSNN[4.1137]GSQFYIR	1137	2	3.4591	366.139	8	b	1						31.0534					37.3706	37.533		14.0769									35.1842	41.0193
GAS1-N40GS	FFYSNN[25.1137]GSQFYIR	1137	2	24.7135	127.039	1	b	1	91.672		74.8095	75.1587		37.3713		42.6993	36.7675	27.5359	10.7327	12.3154	10.8574			37.5339					55.9613		66.9142			29.6764	42.3782		23.5689
GAS1-N40GS	FFYSNN[25.1137]GSQFYIR	1137	2	24.7135	138.055	2	b	1		129.751		75.0686				19.7235		53.3084	55.8893	61.7971	33.4623	34.1524			7.03643	117.754		37.5333	93.1153	66.9133		65.732	24.2187				22.4459	102.306
GAS1-N40GS	FFYSNN[25.1137]GSQFYIR	1137	2	24.7135	145.049	3	b	1	4.21059	37.5322	66.4902	117.534	35.8956	32.6133	43.1545								77.898		34.1069		37.5313	37.5336				37.5058		37.5345	35.7387		16.2841	135.478
GAS1-N40GS	FFYSNN[25.1137]GSQFYIR	1137	2	24.7135	163.06	4	b	1		71.9442				62.7644		83.8614			79.0176	20.4523		22.9368			88.0814	66.4061	37.5019	36.75	62.7452	74.778	66.9142					24.523
GAS1-N40GS	FFYSNN[25.1137]GSQFYIR	1137	2	24.7135	168.065	5	b	1		29.3933	34.7446		36.8724	9.77557							37.5237	77.6072	64.6589		37.5079		37.5333	37.5339	20.1114		35.1842		43.1369		95.181	36.8719
GAS1-N40GS	FFYSNN[25.1137]GSQFYIR	1137	2	24.7135	186.076	6	b	1	28.6875	13.2739				36.3345				37.2509			40.9431			37.5342		72.5031									37.5069			130
GAS1-N40GS	FFYSNN[25.1137]GSQFYIR	1137	2	24.7135	204.087	7	b	1		23.4672			23.5676		54.2195	125.549						28.1279	50.159						52.3335			33.1825				20.4704		49.0468
GAS1-N40GS	FFYSNN[25.1137]GSQFYIR	1137	2	24.7135	366.139	8	b	1		47.3896			43.7676	28.809			36.2861		39.3542	31.7516	90.4997				26.9235	81.5465			77.2892					37.5336	16.5065			146.541
GAS1-N40GS	FFYSNN[8.1137]GSQFYIR	1137	2	7.78183	127.039	1	b	1	4105.87				2064.15	2199.15	4125.08	3355.68	2004.28	3995.96	2800.27	4980.82	4973.15	3039.66		2061.45	2429.55	1716.56	2911.98	1297.01	1303.05	926.063	1316.9	364.606	623.125	1242.41	848.424	1890.75	3545.62	548.598
GAS1-N40GS	FFYSNN[8.1137]GSQFYIR	1137	2	7.78183	138.055	2	b	1	2419.09	196.89				1259.42	1184.13	942.411	1283.53	1285.08	1247.41	1554	620.492	902.159	267.651	498.307	359.865	1228.63	744.284	641.87	1231	1465.77				2077.64		493.576	1292.42	1013.36
GAS1-N40GS	FFYSNN[8.1137]GSQFYIR	1137	2	7.78183	145.049	3	b	1	6083.15				2215.55	5069.88	4576.23	4935.86	2571.36	3795.53	3350.64	6409.53	6153.6	1972.94	647.449	2156.53	2701.09	2150.79	2842.24	1409.53	1844.4	1055.02	1464.21	795.789	606.656	1368.69	2646.66	5761.45	2903.34	1147.1
GAS1-N40GS	FFYSNN[8.1137]GSQFYIR	1137	2	7.78183	163.06	4	b	1	7848.63				1621.46	7901.85	5624.36	6500.12	4137.33	6038.16	3741.4	7151.95	5565.21	4406.35	1227.2	2703.32	3403.23	2207.08	2634.94	1775.87	3639.7	2298.87	751.394	1845.65	529.508	1516.62	1672.74	3204.22	4329.01	3896
GAS1-N40GS	FFYSNN[8.1137]GSQFYIR	1137	2	7.78183	168.065	5	b	1	1750.77		71.4506	72.0916		962.989	1334.82	1239.86	932.56	891.581	617.991	1219.11	559.543	262.516	231.981		177.269	832.765	459.409	574.844	351.636	681.463	182.179			752.682	70.7238	317.838	370.517	605.336
GAS1-N40GS	FFYSNN[8.1137]GSQFYIR	1137	2	7.78183	186.076	6	b	1	780.272	286.127	33.2137	108.172	224.789	400.04	644.019	356.724	641.442	700.663	1258.8	986.069		273.328	201.989	193.687	160.22	349.541	144.625	465.725		618.269	120.717			563.546	480.621	857.841	418.978	449.589
GAS1-N40GS	FFYSNN[8.1137]GSQFYIR	1137	2	7.78183	204.087	7	b	1	5025.24	63.7303	177.476			2539.93	3248.19	3197.68	2413.74	3066.12	2399.39	4369.87	2358.07	2465.72	1198.14	727.322	1050.44	2191.64	1717.66	1704.53	2238.08	1225.94	140.792			2108.03		2931.71	1730.34	1020.18
GAS1-N40GS	FFYSNN[8.1137]GSQFYIR	1137	2	7.78183	366.139	8	b	1	1413.62		297.119	422.203		1235.98	1619.1	1148.91	1024.09	1081.02	689.148	1585.64	702.568	547.878	323.331	455.969	728.493	765.471	594.887	543.428	691.467	586.579				1077.28	359.175	265.176	680.736	703.84
GAS1-N40GS	FFYSNN[5.1137]GSQFYIR	1137	2	5.56617	127.039	1	b	1	62.7046		37.2295	34.7344		8.71751	61.3079	37.5045			47.0998	68.335	77.0426	16.1861	35.7785		37.8	55.7011	102.691		111.788	36.7937			24.239		37.5069	76.3851	34.0492
GAS1-N40GS	FFYSNN[5.1137]GSQFYIR	1137	2	5.56617	138.055	2	b	1								38.5529	75.0643	30.2921		36.6814		35.8018		37.1622	6.97456						37.1943		108.402					74.7535
GAS1-N40GS	FFYSNN[5.1137]GSQFYIR	1137	2	5.56617	145.049	3	b	1	77.088	42.7345	112.268		10.2218		21.3225	218.406		25.9603	99.8242		30.052	77.7816	80.4505	105.112		37.5061	149.692	149.916	134.193	110.673	33.3207	125.809			66.9142	31.775	35.8883	64.2828
GAS1-N40GS	FFYSNN[5.1137]GSQFYIR	1137	2	5.56617	163.06	4	b	1	179.031		111.756		74.878		42.674	149.997	49.9388	18.3248	37.488		357.162	26.8542	109.709			148.604	55.8891	113.586	187.38	197.251	31.1654	25.5476	33.9036		97.5107	25.666	77.8879	234.246
GAS1-N40GS	FFYSNN[5.1137]GSQFYIR	1137	2	5.56617	168.065	5	b	1	74.902	34.1175		37.533	37.51				75.0656		37.5343					37.5334					37.529	37.5339	37.593	36.9617		36.2421				37.5312
GAS1-N40GS	FFYSNN[5.1137]GSQFYIR	1137	2	5.56617	186.076	6	b	1	37.5299	32.9906		37.5255		36.8631	55.6353				110.886		37.736	34.7457									39.0713	75.0675		37.533	35.04	76.433	16.9485	37.3896
GAS1-N40GS	FFYSNN[5.1137]GSQFYIR	1137	2	5.56617	204.087	7	b	1		36.1551	29.6726	37.4595	37.5314	150.133			75.0655	41.7024	36.7076		73.6084	105.742	16.2336	33.8118	37.5333	16.5055	132.032	73.2018			71.5432	76.2537	37.5072		21.9636		35.5256	37.5668
GAS1-N40GS	FFYSNN[5.1137]GSQFYIR	1137	2	5.56617	366.139	8	b	1						37.5343				34.8849		36.8708											38.2049		37.5345		31.0425			37.5349
GAS1-N40GS	FFYSNN[24.1137]GSQFYIR	1137	2	24.0145	127.039	1	b	1	34.8252	236.691	70.364		128.373	26.4367	73.7862	37.1231	30.5783	95.7747	30.8236		77.2383	180.47	40.0715						26.6668	76.7567	75.0178		71.3536		41.2682
GAS1-N40GS	FFYSNN[24.1137]GSQFYIR	1137	2	24.0145	138.055	2	b	1	166.217				40.6179	43.1647	184.198	83.0571	196.841		51.6568			157.444	5.47229	11.3187	174.053	114.582			24.2497	113.262							94.6363	1553.87
GAS1-N40GS	FFYSNN[24.1137]GSQFYIR	1137	2	24.0145	145.049	3	b	1	65.4847	54.4126	75.7394	58.0735	70.2871	163.755	8.60333		21.7828	24.2156		99.8908	209.283	311.262	71.2387			34.034	34.7227	30.1094	14.0765			74.0762	81.7851		122.03		111.062	135.007
GAS1-N40GS	FFYSNN[24.1137]GSQFYIR	1137	2	24.0145	163.06	4	b	1	62.888	81.1687		25.9937		102.325		61.5417		14.8869	96.4297	134.954	196.531		106.733			44.5777	37.7407	52.102		37.1564	42.7164	8.42762				27.6962	37.531	120.163
GAS1-N40GS	FFYSNN[24.1137]GSQFYIR	1137	2	24.0145	168.065	5	b	1	39.999		33.3544	64.562		40.9812		15.4902	75.8971			23.1891	25.0781	155.281		23.9836	70.6395		34.5933		10.3953	38.8568	36.3503				34.7324	37.3688	70.7947	315.159
GAS1-N40GS	FFYSNN[24.1137]GSQFYIR	1137	2	24.0145	186.076	6	b	1	125.955	143.506		68.2591	30.1251	96.4481		29.9755	75.23					188.252		18.2367	70.0398	77.0917				40.9527		74.735	52.6405	75.0674	53.2014		37.531	32.619
GAS1-N40GS	FFYSNN[24.1137]GSQFYIR	1137	2	24.0145	204.087	7	b	1	219.105	124.122		59.25	276.549		39.4774	248.206		19.2285	18.0435	249.267			56.9489	5.6779	115.697		20.6295		72.0566	144.296		69.2671	33.4756	260.094	157.521	21.5307	25.6488	186.266
GAS1-N40GS	FFYSNN[24.1137]GSQFYIR	1137	2	24.0145	366.139	8	b	1	455.345	49.508	26.4629		230.265	40.6051	35.0728	143.791	55.6724	56.5348	74.7909			177.426	52.7118	50.0163		98.295	36.351	72.0697		37.534			89.3086	75.7088	47.1799			51.2159
GAS1-N40GS	FFYSNN[23.1137]GSQFYIR	1137	2	23.064	127.039	1	b	1	201.927		173.4	112.36		188.26	10.6815	37.5321	24.6775		65.859	39.7688	20.4961				52.9831				30.7657	40.7338	24.3443	36.7623		21.6414	39.0092		100.304	178.569
GAS1-N40GS	FFYSNN[23.1137]GSQFYIR	1137	2	23.064	138.055	2	b	1	123.693	267.454		292.974	40.0958			32.4188			37.4708	82.0987		50.7012	257.314	34.0484	166.738	159.636	35.0405	176.314	31.6691			80.2303	34.5931	71.25		103.265	110.462	790.756
GAS1-N40GS	FFYSNN[23.1137]GSQFYIR	1137	2	23.064	145.049	3	b	1	71.9505	153.109		40.1408	69.1788	100.713	124.326	71.5614	23.9277	72.4663	20.2463			65.1659	33.4754		212.304	59.6947	20.4374	149.756	36.7607					37.1024	75.8353		36.3257
GAS1-N40GS	FFYSNN[23.1137]GSQFYIR	1137	2	23.064	163.06	4	b	1	129.039	312.788	211.664	77.6705	224.547			132.993	81.5052	46.8237	42.6455		126.675	88.4476	170.876				23.568	118.704		117.712	14.7413	92.4876	18.2969	31.5738		10.8893		702.291
GAS1-N40GS	FFYSNN[23.1137]GSQFYIR	1137	2	23.064	168.065	5	b	1	42.3496	111.051			63.7123	17.5294	29.3832				27.7476		49.5018	114.488		22.5933		112.88		75.0138		33.4768		160.238	37.2691		37.2664			154.363
GAS1-N40GS	FFYSNN[23.1137]GSQFYIR	1137	2	23.064	186.076	6	b	1	417.759			135.987	30.1074		67.4392	34.4638	67.863			144.968	56.06		73.5438	39.0302		143.584					28.6765	87.5201	15.4562		33.3031	29.8797	51.1869	30.7448
GAS1-N40GS	FFYSNN[23.1137]GSQFYIR	1137	2	23.064	204.087	7	b	1	29.3774		294.394	31.4418	49.8075	109.01	240.146	336.658	327.562	75.0197	113.161		8.52832				128.742		136.176		80.4897	50.35		29.2111	35.5244	46.9534	171.744	100.011	79.6886	448.23
GAS1-N40GS	FFYSNN[23.1137]GSQFYIR	1137	2	23.064	366.139	8	b	1	248.877	141.628		80.7315	148.676	155.769	26.8362	114.038	37.9142	78.1788			61.2185		59.2539	65.7114	114.685	12.5343		49.9536		27.1376	72.082			125.761	51.7157	35.1834	63.2479	65.8315
GAS1-N40GS	FFYSNN[20.1137]GSQFYIR	1137	2	20.5422	127.039	1	b	1			162		63.7019				32.3568		29.1955			313.036		23.7551					34.0814			37.5339	37.5339	70.8298	45.7936		40.1299
GAS1-N40GS	FFYSNN[20.1137]GSQFYIR	1137	2	20.5422	138.055	2	b	1	50.3096	285.057				131.642		135.49	54.0613	110.765	137.944	193.823		47.5734	141.503		162.853	272.675	46.0351		176.878	102.816		95.194		55.7761	305.162		22.3866
GAS1-N40GS	FFYSNN[20.1137]GSQFYIR	1137	2	20.5422	145.049	3	b	1	31.099			16.6031		17.6835	66.908	169.487	11.4117			40.8505	130.57	170.879	101.896	20.4523	61.8796	156.722	49.4725	61.1092	45.0138		114.51	31.7166	66.9192			25.9299
GAS1-N40GS	FFYSNN[20.1137]GSQFYIR	1137	2	20.5422	163.06	4	b	1	151.204	109.652	157.324		83.1367	95.0876	36.0786	38.9366		50.3228		116.033	122.897	103.946	142.202	13.4255	134.15	74.4776		55.5182			129.365	58.443	17.2747	61.8885	99.6007	65.852	70.7002
GAS1-N40GS	FFYSNN[20.1137]GSQFYIR	1137	2	20.5422	168.065	5	b	1			62.4716	28.4059	113.276	61.0677	72.2922		105.469		157.179	97.7677	54.8271	32.6249	62.147				20.9521		99.0715				21.1086		29.9721		36.3865
GAS1-N40GS	FFYSNN[20.1137]GSQFYIR	1137	2	20.5422	186.076	6	b	1			382.07	108.065			64.9151	44.6239			72.8709	101.759	32.433			26.6744		69.1517	71.6033	142.005	120.001	98.8171		59.7869			38.7188	39.6169	58.7883
GAS1-N40GS	FFYSNN[20.1137]GSQFYIR	1137	2	20.5422	204.087	7	b	1	253.157			32.1146	127.98	226.846	152.087	87.2796	255.418	89.1035	34.9886	95.5642		57.5406		68.8727		271.909		28.4595		59.2206	56.2485	23.324	102.551	32.5571			107.387
GAS1-N40GS	FFYSNN[20.1137]GSQFYIR	1137	2	20.5422	366.139	8	b	1	212.013		432.354	149.482			133.187	308.603	134.642	174.278	111.366		203.068	125.325		36.3207			80.5113	19.0993	183.174	159.755	124.058	150.136		32.0697		26.3331	57.4335
GAS1-N40GS	FFYSNN[17.1137]GSQFYIR	1137	2		127.039	1	b	1		303.665					62.4026	198.194			478.728	485.634		130.822				54.1355		85.7914		51.6609		95.3248		191.804	129.178		35.3448
GAS1-N40GS	FFYSNN[17.1137]GSQFYIR	1137	2		138.055	2	b	1					77.7509		525.561			71.7857	167.835	1193.63		171.988		45.742			115.645	320.3		153.687		71.8807			118.82		135.535
GAS1-N40GS	FFYSNN[17.1137]GSQFYIR	1137	2		145.049	3	b	1					386.699			43.7165		101.423	169.822	1575.77		67.5444	117.885				79.6238			59.2911	103.494		97.007	69.7596	232.887	30.6357	58.62
GAS1-N40GS	FFYSNN[17.1137]GSQFYIR	1137	2		163.06	4	b	1		113.62			62.8042		113.928					482.061			254.903					169.335			101.27		89.6007	192.752	388.397	110.397
GAS1-N40GS	FFYSNN[17.1137]GSQFYIR	1137	2		168.065	5	b	1								97.0023				599.104			10.0766	87.2935		73.5172	533.816			13.5506		16.5135			66.7439
GAS1-N40GS	FFYSNN[17.1137]GSQFYIR	1137	2		186.076	6	b	1							102.665	234.271				400.965			35.3715	37.1724				46.9934			140.144	60.2245	134.213		179.072
GAS1-N40GS	FFYSNN[17.1137]GSQFYIR	1137	2		204.087	7	b	1							313.866			76.1051	16.4623	922.789			44.5101								22.989				1056.21		114.299
GAS1-N40GS	FFYSNN[17.1137]GSQFYIR	1137	2		366.139	8	b	1										542.377		211.439			69.4749			246.555	106.264				58.0401				288.203	88.4295	12.9198
GAS1-N40GS	FFYSNN[13.1137]GSQFYIR	1137	2	13.4197	127.039	1	b	1	1247.78	199.873	3451.67	1364.42	6751.43	4011.73	4317.07	756.459	1146.26	2240.55	1195.93	2554.11	2714.22	1927.14	954.293	1782.87		1901.05	2156.64	885.811	1920.76	1581.43	1232.3	1429.45	1308.93		4033.05	4926.8	3293.23	5322.98
GAS1-N40GS	FFYSNN[13.1137]GSQFYIR	1137	2	13.4197	138.055	2	b	1	3419.91		6504.94	3910.72	6024.84	5339.29	4203.08	1524.42	2653.51	1142.34	481.947	1160.4	3856.29	2494.08	1578.17			4826.81	306.802		255.763	1421.11	6637.08	1551.98	443.433		6560.59	2189	3654.83
GAS1-N40GS	FFYSNN[13.1137]GSQFYIR	1137	2	13.4197	145.049	3	b	1	2928.61	794.264	3574.64	3941.68	5620.07	8243.79	8200.9	3123.94	3765.91	4044.06	4865.87	3398.77	4934.23	3296.58	1092.12	3195.53		2912.97	2548.49	2161.69	2597.94	1193.88	7105.45	4015.93	1376.56		9526.51	7434.08	5242.11	11601
GAS1-N40GS	FFYSNN[13.1137]GSQFYIR	1137	2	13.4197	163.06	4	b	1	4694.86	1198.69	13397	5526.04	11120.2	12666.5	6537.6	1437.81	1483.65	2877.88	3840.01	3952.01	6937.55	7083.18	2249.33	5511.49		4061.46	2761.38	2621.1	2870.17	2501.15	8206.22	6897.52	1657.91		7641.91	11807.2	9769.83	16827.2
GAS1-N40GS	FFYSNN[13.1137]GSQFYIR	1137	2	13.4197	168.065	5	b	1	2818.98		3640.67	2094.54	3716.07	4376.69	2678.89		1880.74	1130.45	889.771	1816.49	2682.32	2110.77	999.607	611.509		1439.64	791.398	577.841	1005.18	1081.93	4587.39	1154.87	713.005		2178.28	5529.85	2570.13
GAS1-N40GS	FFYSNN[13.1137]GSQFYIR	1137	2	13.4197	186.076	6	b	1	978.251	543.943	672.044	1431.64	2202.16	2519.77	1342.53		482.455		749.513		938.723	1212.04	100.239	239.793		910.437	936.322		326.089		2246.01	1167.53	1355.65		1878.72	942.03	832.413	819.179
GAS1-N40GS	FFYSNN[13.1137]GSQFYIR	1137	2	13.4197	204.087	7	b	1	3111.2	1298.07	6581.92	3721.26	10002.5	11028.9	5218.06	2626.81	864.224	3738.16	3001.57	2574.53	8432.63	5937.66	1983.48	623.797		3753.58	1935.48	1813.31	2315.39		7715.13	3460.6	2970.29		6609.12	8577.6	6427.54	10905
GAS1-N40GS	FFYSNN[13.1137]GSQFYIR	1137	2	13.4197	366.139	8	b	1	3153.41	287.325	2134.67	2268.14	4658.09	4479.68	2333.09	1123.41	987.934	1990.55	2273.43	1393.18	3150.5	2748.19	1173.67	388.143		2058.86	798.545	896.688	458.975	1456.37	2290.21	2536.53	637.56			2021.97	2974.51	5325.56
GAS1-N40GS	FFYSNN[15.1137]GSQFYIR	1137	2	14.205	127.039	1	b	1	8312.81	202.05	10900.1	8625.01	13823.3	18117.4	5809.69	7037.91	5766.7	7798.4	3746.06	458.052	14094.1	12750.5	6223.51	3042.15	13887.8	11940.4	6051.51	2127.86	4706.2	1437.36		982.552	1224.17	2797.97	2869.21		4746.34	11399.7
GAS1-N40GS	FFYSNN[15.1137]GSQFYIR	1137	2	14.205	138.055	2	b	1	12064.1	1409.8	17088.3	14026.1	21668.6	24687.7	8170.1	11240.9	8291.04	9772.2	4529.55		17301	17137.4	8286.62	5636.49	20455.6	16894.7	7996.82	4641.37	7770.17	1235.45		2808.83	1379.18	3497.5	4577.43		7549.8	15705.6
GAS1-N40GS	FFYSNN[15.1137]GSQFYIR	1137	2	14.205	145.049	3	b	1	17706.1	252.796	20452.2	17806.8	26822.8	29867.5	11758.3	13690.6	10746.7	13030.5	7463.25		22631.8	22702.3	11560.4	7254.29	24955.8	20579.3	9982.41	5873.32	9700.3	2122.66		1807.09	2636.39	3008.69	4683.95		10287.7	24336.3
GAS1-N40GS	FFYSNN[15.1137]GSQFYIR	1137	2	14.205	163.06	4	b	1	31534.6		33940.2	34051.8	49785.8	61336.2	20548.5	23106.4	16977.8	25228.5	11967.7		44092.5	40516.5	20110.4	11494.2	47513.8	34499.9	18466.9	11053.9	17416.2	3573.56		3927.3	2443.55	6619.77	7212.3		17836.2	37323.5
GAS1-N40GS	FFYSNN[15.1137]GSQFYIR	1137	2	14.205	168.065	5	b	1	8665.3	355.568	9220.75	7188.18	12384.6	15890.1	5216.06	5973.66	5201.74	6555.55	3718.49	1009.65	11334.2	12684.2	6042.23	2610.09	12915.8	10358.6	4698.4	3382.9	5208.39	1072.13		935.054	756.914	1759.25	1909.38	395.914	3448.37	11518.9
GAS1-N40GS	FFYSNN[15.1137]GSQFYIR	1137	2	14.205	186.076	6	b	1	4696.42	428.667	5310.02	3668.84	6897.04	8665.73	2542.52	3426.88	3293.83	3903.19	1711.43		7536.23	6440.79	2621.74	2057.96	7268.92	6571.53	2279.15	1592.5	2692.38			900.62	899.789	1482.14	985.355		2417.51	9295.3
GAS1-N40GS	FFYSNN[15.1137]GSQFYIR	1137	2	14.205	204.087	7	b	1	27649		32033.5	23875.9	40673.2	51686.2	16576.3	21182.6	14893.6	18421.9	10335.7		37887.7	34182.8	17442.7	9812.87	43274.5	31463.8	13529.8	7911.35	15565.6	630.241		3293.57	3283.09	5836.19	5624.99		13756.1	32836.3
GAS1-N40GS	FFYSNN[15.1137]GSQFYIR	1137	2	14.205	366.139	8	b	1	8948.55	856.257	10289.9	10399.8	15014.1	19430.4	7763.59	7825.07	5714.6	6363.17	5112.19	407.709	13402.1	13224	5338.27	5629.76	15234.4	11202.2	5850.3	2556.69	3968.94	1303.04		1909.56	1847.8	2299.25	1992.82	266.916	4073.99	12792.9
GAS1-N40GS	FFYSNN[2.1137]GSQFYIR	1137	2	1.98344	127.039	1	b	1	75.0664	29.1719				18.5056	28.7355										33.4763	75.0386			55.6494	33.2521		72.4467	15.5855	60.9176	26.1351	33.0432	22.5189	21.0541
GAS1-N40GS	FFYSNN[2.1137]GSQFYIR	1137	2	1.98344	138.055	2	b	1		37.5448	44.179	26.9015						28.864	74.7675		37.8834		31.0532	37.4876	29.675		37.5328	14.075			23.9419		27.1811				66.8211	150.134
GAS1-N40GS	FFYSNN[2.1137]GSQFYIR	1137	2	1.98344	145.049	3	b	1						23.5684	26.4479	38.5537				33.3526	52.0825	42.6781		26.9242		32.1426	37.5893	14.075		39.255						26.8433	23.5676
GAS1-N40GS	FFYSNN[2.1137]GSQFYIR	1137	2	1.98344	163.06	4	b	1	37.7267		31.7779	21.6879	19.0063		19.2044					36.7683						50.2394	37.5284		18.3757		35.8005	37.5329	78.5414			38.1745		36.7948
GAS1-N40GS	FFYSNN[2.1137]GSQFYIR	1137	2	1.98344	168.065	5	b	1		38.1996		37.5337	34.0459				112.145	36.6154				37.5336						5.82465		37.5337
GAS1-N40GS	FFYSNN[2.1137]GSQFYIR	1137	2	1.98344	186.076	6	b	1	26.8709								37.5331	37.5277			23.3335		72.2454					14.075	33.0598		37.5328
GAS1-N40GS	FFYSNN[2.1137]GSQFYIR	1137	2	1.98344	204.087	7	b	1	37.5331		29.6733	40.9523		22.5185		22.7963		38.2013	37.5339	75.0117	36.2249	71.1515	35.7247			37.5343		23.5676	37.5053					36.8725	25.1768		66.9125	70.9801
GAS1-N40GS	FFYSNN[2.1137]GSQFYIR	1137	2	1.98344	366.139	8	b	1	37.7381	37.5289			9.54026			65.8612				36.8708				37.5323	37.5299	37.3876				37.5338				36.8725				37.5334
GAS1-N40GS	FFYSNN[18.1137]GSQFYIR	1137	2	17.7609	127.039	1	b	1		57.9233			307.573	87.7771	76.9275	138.533		161.042	64.5173		136.005	349.027	31.6302	69.9392		54.9896		111.675				201.102	34.743	24.1736	16.2937	27.799	225.823
GAS1-N40GS	FFYSNN[18.1137]GSQFYIR	1137	2	17.7609	138.055	2	b	1		486.916	390.209	15.5483	446.671			314.088		80.0602	124.188			264.909	178.817	132.468	350.188			86.1099	192.122	106.898		77.2381		154.831	71.7424	21.297	391.102
GAS1-N40GS	FFYSNN[18.1137]GSQFYIR	1137	2	17.7609	145.049	3	b	1	288.185		78.0365	184.855	369.249		32.7891	90.5911	211.242	45.9798	20.6475	125.456		145.137	38.9766			253.21	61.5794		62.1434	135.074	189.637	158.562	63.0116			305.453	109.991
GAS1-N40GS	FFYSNN[18.1137]GSQFYIR	1137	2	17.7609	163.06	4	b	1		472.819	79.9987		121.048	12.8918	155.823			98.2869		163.362	104.335	76.3484	207.67		16.8138	89.1192				94.9575	94.7761		42.7443	40.8992		56.0292	101.183
GAS1-N40GS	FFYSNN[18.1137]GSQFYIR	1137	2	17.7609	168.065	5	b	1	267.27		458.005					113.902	167.762		102.414		89.9879	135.744	29.6053	21.7384	68.4128		11.2006							37.0469	128.393
GAS1-N40GS	FFYSNN[18.1137]GSQFYIR	1137	2	17.7609	186.076	6	b	1	230.765	164.9			39.0056		36.8176	52.4152	225.229							39.4259	178.856	109.222		126.23			150.833	62.7345		29.6466		32.255	36.2959
GAS1-N40GS	FFYSNN[18.1137]GSQFYIR	1137	2	17.7609	204.087	7	b	1			187.893	334.895	244.633		70.7339	557.749	257.842		23.6873			165.052		40.9307		392.237	207.755	152.521	35.8076	88.6901	56.6765					122.312	221.475
GAS1-N40GS	FFYSNN[18.1137]GSQFYIR	1137	2	17.7609	366.139	8	b	1	95.9969	53.0206		188.389	243.82		122.967			488.41		189.208	45.6303	48.279	22.1686		128.6	287.208	135.541		320.141	105.093	67.93		18.0295	75.2624	101.323
GAS1-N40GS	FFYSNN[29.1137]GSQFYIR	1137	2	28.6522	127.039	1	b	1									5.82527
GAS1-N40GS	FFYSNN[29.1137]GSQFYIR	1137	2	28.6522	138.055	2	b	1	5.95601		37.5076															31.0534
GAS1-N40GS	FFYSNN[29.1137]GSQFYIR	1137	2	28.6522	145.049	3	b	1		31.0524							20.3515					5.82404															37.3884	32.936
GAS1-N40GS	FFYSNN[29.1137]GSQFYIR	1137	2	28.6522	163.06	4	b	1								74.2972										42.5981
GAS1-N40GS	FFYSNN[29.1137]GSQFYIR	1137	2	28.6522	168.065	5	b	1														14.0755
GAS1-N40GS	FFYSNN[29.1137]GSQFYIR	1137	2	28.6522	186.076	6	b	1														23.5682
GAS1-N40GS	FFYSNN[29.1137]GSQFYIR	1137	2	28.6522	204.087	7	b	1	36.872	36.8721	125.869					36.8717																					37.507	26.6673
GAS1-N40GS	FFYSNN[29.1137]GSQFYIR	1137	2	28.6522	366.139	8	b	1
GAS1-N40GS	FFYSNN[26.1137]GSQFYIR	1137	2	25.302	127.039	1	b	1	37.3891		72.14	25.5403		23.5696		34.7453				37.387				37.5306										26.5041
GAS1-N40GS	FFYSNN[26.1137]GSQFYIR	1137	2	25.302	138.055	2	b	1	55.8893	61.8108					37.5332					26.859					7.47949			37.5343					37.5331		37.5341			209.926
GAS1-N40GS	FFYSNN[26.1137]GSQFYIR	1137	2	25.302	145.049	3	b	1					36.6055	21.1801		37.7408	37.5323	72.2407	35.1836	21.8605	37.5308				37.5086	37.3888			36.8719			7.15048		35.1846	75.0672
GAS1-N40GS	FFYSNN[26.1137]GSQFYIR	1137	2	25.302	163.06	4	b	1				40.6877	37.5515	53.7911							107.777	113.577	75.0571		64.4961		14.2342		74.1942		37.5363	75.0635						117.649
GAS1-N40GS	FFYSNN[26.1137]GSQFYIR	1137	2	25.302	168.065	5	b	1	58.4919				37.5346	30.8097							59.6079				37.5294	75.1526												56.6351
GAS1-N40GS	FFYSNN[26.1137]GSQFYIR	1137	2	25.302	186.076	6	b	1	14.076	16.848				14.0763							6.17065	41.5479	42.4931						30.1657		26.923		37.5334
GAS1-N40GS	FFYSNN[26.1137]GSQFYIR	1137	2	25.302	204.087	7	b	1			14.7104		37.5329			33.4645	37.277		36.8721	36.235					6.98551	33.6598									125.103	14.0748		48.1326
GAS1-N40GS	FFYSNN[26.1137]GSQFYIR	1137	2	25.302	366.139	8	b	1		37.5238	41.3496	19.5198	46.7169	29.0764	42.0253		37.5271	112.566			37.3704	30.6391		26.7539	26.9236		37.5092	75.0663						36.8715		16.8553		15.9096
GAS1-N40GS	FFYSNN[11.1137]GSQFYIR	1137	2	11.3965	127.039	1	b	1	9415.21	7645.81	11934.4	1164.98	3824.05	3973.39	7115.57	9516.92	5541.64	422.371	1273.48	990.516	5928.76	5152.69	2846.37	521.629	7429.83	7732.85	5665.09	4572		685.919	1417.55				3482.13	5611.15	1142.24	10031.7
GAS1-N40GS	FFYSNN[11.1137]GSQFYIR	1137	2	11.3965	138.055	2	b	1	10600.1	7681.07	14955.7		4830.12	5685.62	8522.65	11212.1	6327.06	427.32	1038.39		7938.99	7251.59	3995.06	139.977	9247.02	6883.01	6092.44	5677.89		2052.83	868.673	249.695			2578.87	9227.71	363.915	9868.82
GAS1-N40GS	FFYSNN[11.1137]GSQFYIR	1137	2	11.3965	145.049	3	b	1	14652.1	12954.5	22034.4	822.675	6332.24	7261.16	12720.3	16707.4	9787.58	619.327	1739.04		13439.1	10379.4	7476.55	1661.91	11688.3	13596.8	8567.66	7767.87		1873.27	1996.22				5625.86	12608.8	1455.35	15913.5
GAS1-N40GS	FFYSNN[11.1137]GSQFYIR	1137	2	11.3965	163.06	4	b	1	22126.5	17567	29528.4	1393.77	9645	11823.6	17575.9	24644.6	13094.4		2399.93		16264.1	15634.9	8964.61	1103.74	17714.9	15490.7	12172.8	13223.5		1665.81	2257.56				8495.42	17388.6	1369.22	23570.6
GAS1-N40GS	FFYSNN[11.1137]GSQFYIR	1137	2	11.3965	168.065	5	b	1	8028.13	5707.9	9892.11		2358.36	3908.42	4918.86	8436.15	3949.29	102.714			6140.14	4899.82	2685.45		5278.57	4245.1	3050.51	4261.17		184.41		157.952			3018.75	5475.2		6976.24
GAS1-N40GS	FFYSNN[11.1137]GSQFYIR	1137	2	11.3965	186.076	6	b	1	3161.09	2494.57	5810.15	373.542	1128.81	990.128	3677.01	4043.28	2461.98	195.912	323.068		2399.55	2113.94	1459.37	275.249	2808.04	3093.09	2334.56	2015.26		134.137					1201.99	2563.66	105.402	2782.14
GAS1-N40GS	FFYSNN[11.1137]GSQFYIR	1137	2	11.3965	204.087	7	b	1	18010.3	12786.1	27069.8	604.792	7132.6	9390.44	13600.2	22659.3	11571.6		1292.49		13861.7	11748.4	7186.25	229.426	15685.8	11901.2	9821.71	9939.93		421.849		468.809			5583	12603.2	385.751	17358.2
GAS1-N40GS	FFYSNN[11.1137]GSQFYIR	1137	2	11.3965	366.139	8	b	1	7033.34	5049.54	9301.51	410.006	3505.38	3301.97	5385.94	7550.47	4412.68		644.932	334.506	6867.81	4335.95	4077.7	656.642	5967.88	4816.2	3610.32	3741.54		1346.43	333.261				2355.09	5129.8	533.394	6244.26
GAS1-N40GS	FFYSNN[16.1137]GSQFYIR	1137	2	15.7322	127.039	1	b	1	535.577	689.406	1135.54				101.521	871.056	480.712	40.8733	639.12	476.078	273.533			243.694				84.0939		709.171	1169.97	1450.79	73.671	960.958		581.1	1124.32	551.096
GAS1-N40GS	FFYSNN[16.1137]GSQFYIR	1137	2	15.7322	138.055	2	b	1	1953.53	2184.99	4669.13					2426.68	675.333	1461.26	275.66	501.744				456.982			133.601	661.223		3869.95	4727.63	4296.35	161.645	843.261		1661.1	1240.55
GAS1-N40GS	FFYSNN[16.1137]GSQFYIR	1137	2	15.7322	145.049	3	b	1	651.106	518.307	1636.59					1620.43	492.618	442.579	36.2575	1367.75				58.5229			80.9605	241.787		1864.55	1937.89	2214.75	105.894	570.726		809.059	817.303	3805.15
GAS1-N40GS	FFYSNN[16.1137]GSQFYIR	1137	2	15.7322	163.06	4	b	1	1382.86	1663.8	2429.67					1997.34	909.859	547.722		226.717				157.486				122.707		2143.03	3071.02	2411.96	258.158	1269.44		1008.82	1504.15
GAS1-N40GS	FFYSNN[16.1137]GSQFYIR	1137	2	15.7322	168.065	5	b	1	1246.09	368.616	1191.72					516.156	958.151	924.674	660.873		13.5269			535.069			319.125	1133.27		1305.9	1955.03	2562.64	29.2225	322.116			444.167
GAS1-N40GS	FFYSNN[16.1137]GSQFYIR	1137	2	15.7322	186.076	6	b	1	881.139	444.48	1525.57				114.336	306.473	457.326	484.495		368.78	174.635			80.0671				283.175		1503.71	899.438	1043.92		229.119		301.571	908.501	1133.8
GAS1-N40GS	FFYSNN[16.1137]GSQFYIR	1137	2	15.7322	204.087	7	b	1	2432.85	1179.75	3635.92					1456.68	1637.17	938.489		541.288	229.639			566.363				653.101		6366.59	6093.8	4007.85	499.568	1049.75		1068.29	1391.14
GAS1-N40GS	FFYSNN[16.1137]GSQFYIR	1137	2	15.7322	366.139	8	b	1	874.856	821.179	1100.62				630.492	1627.73	487.071	135.824						604.864				746.774		1410.64	1834.4	1736.4	446.18	492.308			435.46	1526.61
GAS1-N40GS	FFYSNN[27.1137]GSQFYIR	1137	2	27.7154	127.039	1	b	1			74.271	37.5316				34.7449				37.534				37.5306
GAS1-N40GS	FFYSNN[27.1137]GSQFYIR	1137	2	27.7154	138.055	2	b	1			36.3484				37.5333					27.5952					37.5305						37.2655							37.8413
GAS1-N40GS	FFYSNN[27.1137]GSQFYIR	1137	2	27.7154	145.049	3	b	1		36.8697		37.5302						36.6544	37.5335	21.0449	37.3627	75.0401				37.5334	37.4694				15.254							24.3473
GAS1-N40GS	FFYSNN[27.1137]GSQFYIR	1137	2	27.7154	163.06	4	b	1					4.09491	34.625							105.098								31.0523									40.8295
GAS1-N40GS	FFYSNN[27.1137]GSQFYIR	1137	2	27.7154	168.065	5	b	1	65.464	36.8697				39.2546		37.533	31.0533				79.3388					75.0656
GAS1-N40GS	FFYSNN[27.1137]GSQFYIR	1137	2	27.7154	186.076	6	b	1					5.8257								6.17456																	25.8105
GAS1-N40GS	FFYSNN[27.1137]GSQFYIR	1137	2	27.7154	204.087	7	b	1	31.0524			37.5321		36.8636	19.4577		13.0668		37.5343	19.0128		72.1609				28.7952	37.5348		36.8673									61.6001
GAS1-N40GS	FFYSNN[27.1137]GSQFYIR	1137	2	27.7154	366.139	8	b	1	29.0838			74.783	23.5101			37.533		68.976			33.4776			26.7565	37.5336													37.3888
GAS1-N40GS	FFYSNN[21.1137]GSQFYIR	1137	2	20.565	127.039	1	b	1			64.7949		52.9706	77.6793	12.6439	17.2609	28.7598	16.5857			31.0519	223.261		52.112	168.243		33.0259								192.738
GAS1-N40GS	FFYSNN[21.1137]GSQFYIR	1137	2	20.565	138.055	2	b	1	317.965	178.386	422.663			259.053	90.8026	75.2683		79.7475	78.013		122.545	25.6623	46.1396	153.551				36.3142	44.1534	10.1978	25.1083	58.646		7.41075	40.4163
GAS1-N40GS	FFYSNN[21.1137]GSQFYIR	1137	2	20.565	145.049	3	b	1	68.0009	215.923		15.0054		154.174	76.3615		166.012	79.1801			142.795	151.911			29.6536		51.756		74.8836	23.8847	50.8856	66.8479			89.7218	28.0304
GAS1-N40GS	FFYSNN[21.1137]GSQFYIR	1137	2	20.565	163.06	4	b	1	188.815	87.5636			34.6223	363.09	182.831	44.6096	192.715			405.405	87.4593			22.7982	37.4371	215.333		140.11	32.0049		116.496	232.819	9.57819		71.6963	74.728	64.7181
GAS1-N40GS	FFYSNN[21.1137]GSQFYIR	1137	2	20.565	168.065	5	b	1	20.6371		104.662		89.2287						137.214		30.981	28.3487	10.7315						34.8751	5.82404		149.054	36.6398	99.3377	56.2783		142.942
GAS1-N40GS	FFYSNN[21.1137]GSQFYIR	1137	2	20.565	186.076	6	b	1			102.466	73.2863		64.7487	19.3968	56.9552	67.8372	45.9434			70.8867		108.054		67.8905	54.3688	33.4835		74.2268	7.69958		27.6987	53.7274	36.7198		39.617	58.1613
GAS1-N40GS	FFYSNN[21.1137]GSQFYIR	1137	2	20.565	204.087	7	b	1	319.546		107.176	91.838		88.0984		72.8581		18.1725	47.1418	408.516		122.512	91.7462	73.4949	137.735	70.5211		54.3246	129.136	38.7414	63.8445	247.1		17.2667	375.331		95.3917
GAS1-N40GS	FFYSNN[21.1137]GSQFYIR	1137	2	20.565	366.139	8	b	1	101.042	157.749	498.964	325.57	80.4115	107.321		235.675		15.3211	67.0431	74.6362	202.05	106.716	57.4705		27.0797			31.2784	67.3425	38.2721	61.251			151.811	133.008	26.3332	58.1748
GAS1-N40GS	FFYSNN[30.1137]GSQFYIR	1137	2		127.039	1	b	1
GAS1-N40GS	FFYSNN[30.1137]GSQFYIR	1137	2		138.055	2	b	1
GAS1-N40GS	FFYSNN[30.1137]GSQFYIR	1137	2		145.049	3	b	1
GAS1-N40GS	FFYSNN[30.1137]GSQFYIR	1137	2		163.06	4	b	1
GAS1-N40GS	FFYSNN[30.1137]GSQFYIR	1137	2		168.065	5	b	1
GAS1-N40GS	FFYSNN[30.1137]GSQFYIR	1137	2		186.076	6	b	1
GAS1-N40GS	FFYSNN[30.1137]GSQFYIR	1137	2		204.087	7	b	1
GAS1-N40GS	FFYSNN[30.1137]GSQFYIR	1137	2		366.139	8	b	1
GAS1-N40GS	FFYSNN[10.1137]GSQFYIR	1137	2	9.35361	127.039	1	b	1	492.917		1042.86	1162.63			499.143			453.975	1401.9		2069.91	1498.51	814.958	629.492	2451.4	780.568	609.221	773.971		801.366	1606.85	1205.68	454.798	338.64	118.306	1104	1243.6
GAS1-N40GS	FFYSNN[10.1137]GSQFYIR	1137	2	9.35361	138.055	2	b	1	94.7857			148.774	220.765	305.127				1174.79	1035.39					273.555			306.372		343.822	1981.55	1081.7	96.0044	469.678	1060.21	162.086		531.433
GAS1-N40GS	FFYSNN[10.1137]GSQFYIR	1137	2	9.35361	145.049	3	b	1			778.229	746.355		253.638	1463.45		858.408	971.474	1592.18		3579.95	4130.56	1447.33	1904.78	2516.65	2254.27	1316.57	736.857	193.3	2466.06	2013.58	1408.44	283.725	314.722	111.872	2004.62	1370.85
GAS1-N40GS	FFYSNN[10.1137]GSQFYIR	1137	2	9.35361	163.06	4	b	1	807.125		395.356	1727.52			821.501		476.402		2785.87		6889.91	4510.14	2532.37	1219.83	4946.45	3141.36	1796.26	1121.12	629.047	1555.29	2295.95	1000.37	289.151	337.693	68.4103	2399.92	1404.67
GAS1-N40GS	FFYSNN[10.1137]GSQFYIR	1137	2	9.35361	168.065	5	b	1		209.756	639.088	105.338		417.43	153.025		108.852	207.039	456.814								154.557		44.368	515.903			369.838	861.334	951.966		155.948
GAS1-N40GS	FFYSNN[10.1137]GSQFYIR	1137	2	9.35361	186.076	6	b	1	129.803	151.937	789.661	703.7	261.635		305.955		24.8868	283.639	284.121					346.769			59.2864	217.495		199.251	194.216		167.344	147.587			95.4663
GAS1-N40GS	FFYSNN[10.1137]GSQFYIR	1137	2	9.35361	204.087	7	b	1	93.3403			925.852		593.545	468.904			502.307	1282.52					288.278			330.892		70.3919	535.84		170.842	901.869	1650.97	140.106	197.483	484.71
GAS1-N40GS	FFYSNN[10.1137]GSQFYIR	1137	2	9.35361	366.139	8	b	1	206.778		384.974	640.531	109.598		246.28			98.0767	983.981					663.37			899.376			999.08	290.12	41.8013	279.686		683.306		544.539
GAS1-N40GS	FFYSNN[7.1137]GSQFYIR	1137	2	7.77635	127.039	1	b	1	1681.62	1159.99	3755.03	1895.34	2057.23	950.19	3580.64	2863	808.462	1876.77		2730.67	4380.49		444.689	1048.95	1137.05		1510.25	871.859	1495.41	1328.67	1716.5	540.014		540.098		1373.95	2258.64	556.052
GAS1-N40GS	FFYSNN[7.1137]GSQFYIR	1137	2	7.77635	138.055	2	b	1	1425.13	564.889		207.037			566.339	628.698	468.917	567.842		604.631	256.082	8.32165	60.5113	223.277	242.283			615.902		53.104	248.474		176.466	111.783		84.8283	245.373	1254.96
GAS1-N40GS	FFYSNN[7.1137]GSQFYIR	1137	2	7.77635	145.049	3	b	1	5473.5	3526.13	8132.37	1774.64	1277.78	1838.51	3446.67	1402.88	2164.99	2927.99		2904.41	5091.89		339.917	1402.44	1782.4		1066.44	1323.95	2081.27	715.131	1248.79	755.016		335.587		2224.67	2350.71
GAS1-N40GS	FFYSNN[7.1137]GSQFYIR	1137	2	7.77635	163.06	4	b	1	3971.94	3493.96	3632.72	1491.16	1400.83		2662.3	3215.94	2525.39	2391.45		5364.28	1627.54	11.4191		1808.17	1505.71		2493.3	2031.66	500.725	739.755	838.188	1699.6		809.411	14.0758	953.668	2512.28	6067.66
GAS1-N40GS	FFYSNN[7.1137]GSQFYIR	1137	2	7.77635	168.065	5	b	1	943.193	719.76		138.369			429.163	413.001	336.067	584.109		678.547	410.737		38.5451	118.773	220.064		413.871	106.625		316.649			40.103	161.793	14.0759	115.794	237.072	320.902
GAS1-N40GS	FFYSNN[7.1137]GSQFYIR	1137	2	7.77635	186.076	6	b	1	125.249	589.4			99.3803	309.374		317.171	92.4129							57.8714			178.46	181.588		129.045	209.529		17.5492				271.916	462.194
GAS1-N40GS	FFYSNN[7.1137]GSQFYIR	1137	2	7.77635	204.087	7	b	1	3030.09	2142.29		372.972			1227.26	2021.41	818.323	1340.38		2199.09	1390.8			390.823	434.049		886.968	901.632		619.909	75.6022	441.359		333.519	30.9793	518.571	764.934	1214.23
GAS1-N40GS	FFYSNN[7.1137]GSQFYIR	1137	2	7.77635	366.139	8	b	1	705.701	624.778		443.05			444.289	554.322	337.196	571.671		713.453	405.801	36.7006		314.636	439.171		329.557	278.191			197.72	43.466	90.5378	138.753			270.772	671.444
GAS1-N40GS	FFYSNN[28.1137]GSQFYIR	1137	2	27.717	127.039	1	b	1		37.5345											97.7824		37.5344												14.3453			74.8522
GAS1-N40GS	FFYSNN[28.1137]GSQFYIR	1137	2	27.717	138.055	2	b	1			37.2678			37.5339											37.5092	4.43104									37.5339
GAS1-N40GS	FFYSNN[28.1137]GSQFYIR	1137	2	27.717	145.049	3	b	1				37.5337		37.5336						35.185		75.0682															37.5326
GAS1-N40GS	FFYSNN[28.1137]GSQFYIR	1137	2	27.717	163.06	4	b	1		37.5342	37.5324					74.1139					37.5341	8.99606	37.5338															37.5411
GAS1-N40GS	FFYSNN[28.1137]GSQFYIR	1137	2	27.717	168.065	5	b	1	73.5313								37.5341			31.0545		37.5337																37.5518
GAS1-N40GS	FFYSNN[28.1137]GSQFYIR	1137	2	27.717	186.076	6	b	1																														65.6774
GAS1-N40GS	FFYSNN[28.1137]GSQFYIR	1137	2	27.717	204.087	7	b	1	37.3701			37.5362		13.4665		36.8717	37.8258						37.5338			66.3773									37.5339		37.5295
GAS1-N40GS	FFYSNN[28.1137]GSQFYIR	1137	2	27.717	366.139	8	b	1	113.509		37.5324									29.077		37.5337			36.8715										37.5336
GAS1-N40GS	FFYSNN[3.1137]GSQFYIR	1137	2	3.46203	127.039	1	b	1		9.61625				102.75									39.7781	37.5296				29.7534	34.4544	33.6842			37.5331			33.0416	32.3323
GAS1-N40GS	FFYSNN[3.1137]GSQFYIR	1137	2	3.46203	138.055	2	b	1	37.5306		32.7395			152.433	65.8633		37.5337	19.8482			24.2035	45.1818	37.5071			55.8911	37.3882				8.97872	6.42922	78.7254				71.8305
GAS1-N40GS	FFYSNN[3.1137]GSQFYIR	1137	2	3.46203	145.049	3	b	1	29.1657			29.6636		37.7919	31.0538	37.8806				30.1543		34.801	16.5056	10.8565			37.529	68.823	21.3633				39.2505	37.3706		26.9252	38.9815
GAS1-N40GS	FFYSNN[3.1137]GSQFYIR	1137	2	3.46203	163.06	4	b	1		35.8427	28.1249	25.1109	75.7269	14.35	13.2686		154.343			37.5309	4.46348	38.1903	75.0641	37.5051	53.3156	37.3936	28.8937		27.7194		15.5279	4.53048				33.8612		13.067
GAS1-N40GS	FFYSNN[3.1137]GSQFYIR	1137	2	3.46203	168.065	5	b	1			37.5335							16.5059				36.3507			37.5331			37.5332		37.2664		14.0767		8.82773	37.5336
GAS1-N40GS	FFYSNN[3.1137]GSQFYIR	1137	2	3.46203	186.076	6	b	1										37.5305			26.9237		36.2292						37.5335		14.0756
GAS1-N40GS	FFYSNN[3.1137]GSQFYIR	1137	2	3.46203	204.087	7	b	1	37.5306	37.5335			76.4405	123.707	23.2327	27.5154		29.2366	37.5212	74.2339	39.6301			37.267	37.2687	5.82551		37.5226				23.5694					78.2844	11.2798
GAS1-N40GS	FFYSNN[3.1137]GSQFYIR	1137	2	3.46203	366.139	8	b	1			37.5303					75.0675			37.5056	37.533		37.5344				19.0685		37.5337		31.0529		5.02659			37.4882			23.5684
GAS1-N40GS	FFYSNN[14.1137]GSQFYIR	1137	2	14.2018	127.039	1	b	1	13725.3	13236.2	15107.6	1746.86	5152.01	20457.3	5416.04	9818.2	8127.27	9334.57	3897.38	13906.8	14510.4	15644.5	7221.65	2703.1	1722.57	14428.2	5575.98	2062.68	5699.09	1794.29	937.175		1102.61			1697.48	3953.66	10296.7
GAS1-N40GS	FFYSNN[14.1137]GSQFYIR	1137	2	14.2018	138.055	2	b	1	17141.6	14916.1	21589.1	5357.28	7958.86	29471.9	8581.17	11639.4	9219.03	10901.1	4883.35	16666.4	19759	20356.3	8038.96	4432.77	3024.24	18688.8	7122.36	3615.57	7352.17	4973.77	5234.27	2904.03	1208.46			2549.57	6351.11	16191.3
GAS1-N40GS	FFYSNN[14.1137]GSQFYIR	1137	2	14.2018	145.049	3	b	1	26208.2	20847.3	27655.1	6164.17	6850.82	33736.9	11434.7	13161.8	12243.6	14191.5	6805.87	24785.2	24235	26135	12435.1	6144.7	3921.9	23250.6	9512.18	5538.26	10591	2651.97	2854.05	642.889	2594.17			3620.22	8296.53	22026.4
GAS1-N40GS	FFYSNN[14.1137]GSQFYIR	1137	2	14.2018	163.06	4	b	1	44151.3	36062.8	42405.7	6296.47	16158.6	67969.4	20989	26383.6	21940.1	26099.8	12218.4	45207.8	46179.8	45257.4	21782.3	10478.3	7309.58	38835.7	16848.6	10378.6	15515	1868.5	3119.1	1707.24	2457.59			6798.54	15024.1	34292.9
GAS1-N40GS	FFYSNN[14.1137]GSQFYIR	1137	2	14.2018	168.065	5	b	1	12907.6	9712.68	12286	2772.16	5465.89	18759.8	5038.27	6873.29	5488.2	7278.91	3825.41	14175.7	13110.4	14203.5	5621.41	2336.82	2425.69	12622	4796.69	2111.47	4446.94	2727.05	3232.35	2146.05	835.117			1835.69	2889.72	10533.2
GAS1-N40GS	FFYSNN[14.1137]GSQFYIR	1137	2	14.2018	186.076	6	b	1	7812.51	5578.31	7643.86	2417.56	3792.68	10669.2	2755.23	3636.47	3883.43	3763.61	1491.06	6758.14	8595.72	6323.77	2205.6	1790.27	1293.07	7079.76	1747.56	1307.31	2963.9	1664.94	1494.56	920.42	839.861			533.24	2410.44	8900.52
GAS1-N40GS	FFYSNN[14.1137]GSQFYIR	1137	2	14.2018	204.087	7	b	1	40193.1	30728.9	42490.6	7154.08	14713.3	58999.9	17031.3	24256	21681.2	18901.3	9934.81	38436.8	41305.6	39569.6	18747.9	8628.03	7082.93	37404.2	12198	7488.39	14336.4	5283.57	5190.71	4595.19	2878.77			4521.67	11029.3	31859.6
GAS1-N40GS	FFYSNN[14.1137]GSQFYIR	1137	2	14.2018	366.139	8	b	1	11575.5	9326.14	13038.7	4187.57	6195.33	22191.1	7119.02	7880.94	6974.33	6987.16	4383.67	12892.6	13962.6	15239.5	5798.91	3712	4113.65	12062.8	4567.38	2145.69	3818.4	2719.23	1068.76	1468.58	1890.22			1024.55	3589.27	12474.5
GAS1-N40GS	FFYSNN[12.1137]GSQFYIR	1137	2	12.1749	127.039	1	b	1	890.791	6702.67	12131.7	3407.83	5941.53	4300.53	6942.37	1249.06	5408.21	1645.44	1623.78	11937.7	3828.37	3218.3	4301.63	2168.26	3184.71	2445.46	6887.86	5747.41	2205.44	2497.27	2823.43	1632.53	836.997		3653.86	6499.27	7339.11	9326.19
GAS1-N40GS	FFYSNN[12.1137]GSQFYIR	1137	2	12.1749	138.055	2	b	1	1572.5	6787.58	14549.3	1685.91	2118.83	3044.18	8458.76	1429.77	6234.33	613.074		14512.7	2283.28	434.443	3557.17	851.197	1433.7	1724.05	5744.43	5579.36	713.531	1548.33	1898.52	443.474	1067.05		3469.48	5675.07	7703.97	7239.78
GAS1-N40GS	FFYSNN[12.1137]GSQFYIR	1137	2	12.1749	145.049	3	b	1	2581.5	11979.8	20203.6	4251.14	6353.38	5721.41	14765.5	2370.02	9485.65	2955.64	2123.3	23023	3362.36	3871.99	11252.7	2526.22	4764.48	1714.99	10301.2	9817.27	1694.95	3099.89	4457.56	3048.74	1317.61		5993.21	7665.87	11732.5	13366.5
GAS1-N40GS	FFYSNN[12.1137]GSQFYIR	1137	2	12.1749	163.06	4	b	1	1573.32	16749.6	27494.6	7798.53	6313.5	6734.78	18242.9	3024.31	12162.5	2951.42		29704.4	5993.38	3873.29	9997.79	2395.35	5700.99	2471.03	14253.3	14449.7	2795.21	4766.73	7583.98	3058.92	1359.82		7324.7	11762.5	11041.7	10459.5
GAS1-N40GS	FFYSNN[12.1137]GSQFYIR	1137	2	12.1749	168.065	5	b	1	874.822	4416.86	9748.34	1257.94	1006.64	1013.79	4801.15	885.009	4022.51	1195.07	636.437	10429.6	441.081	1395.91	2689.89	1144.06	1091.77	486.406	3205.93	4044.77	635.043	858.235	1639.69	666.997			1224.54	3239.65	4325.01	6406.13
GAS1-N40GS	FFYSNN[12.1137]GSQFYIR	1137	2	12.1749	186.076	6	b	1		2453.77	5406.38	1506.11	1984.15	856.157	3567.77	336.85	2560.1			5217.42	489.372	949.488	1624.5	351.198	1105.38		2018.99	1354.74	287.964	366.991	849.768	256.195	352.169		1205.84	1651.74	2191.71	3254.05
GAS1-N40GS	FFYSNN[12.1137]GSQFYIR	1137	2	12.1749	204.087	7	b	1	1369.86	12013.7	26923.4	3304.22	4803.41	2974.44	13307.3	1348.21	11130.6	1453.01	1715.12	25646.8	1492.46	1196.88	6951.72	2190.45	3109.77	1608.82	9170.44	9936.02	1470.02	1539.18	2143.06	1109.59	1779.31		4587.03	8351.99	9050.67	11491.1
GAS1-N40GS	FFYSNN[12.1137]GSQFYIR	1137	2	12.1749	366.139	8	b	1	371.041	4340.63	8149.77	962.208	969.628	684.604	5634.16	688.679	3800.61	586.113	533.086	9971.5	504.078		3162.1		159.682	446.715	3612.25	4281.42	149.868	779.471	1014.66	741.12	656.813		276.588	2362.74	2558.12	2465.03
GAS1-N40GS	FFYSNN[1.1137]GSQFYIR	1137	2	1.47066	127.039	1	b	1					37.5336	45.1284	38.8869		12.6233	37.5338				37.0983	75.0675		34.4786	74.2746							69.8284	63.6641				16.4435
GAS1-N40GS	FFYSNN[1.1137]GSQFYIR	1137	2	1.47066	138.055	2	b	1	36.3782	56.4276	14.077						37.5325	39.2557		75.0667	36.8718			31.0523			75.0678	106.362			37.5347		57.8777			36.7497	74.7766
GAS1-N40GS	FFYSNN[1.1137]GSQFYIR	1137	2	1.47066	145.049	3	b	1	37.531			37.5104		41.0181	28.6989	34.1093					37.3898	37.5332		24.4364	24.5233	35.1843		37.5323	37.3898						36.3502			74.2341
GAS1-N40GS	FFYSNN[1.1137]GSQFYIR	1137	2	1.47066	163.06	4	b	1	37.7365	52.5653	36.3995	35.7092			40.1227			40.9471	36.2852	31.0928		33.0151	41.1709		19.2563	49.5925	37.3779		101.844						13.5718			36.7909
GAS1-N40GS	FFYSNN[1.1137]GSQFYIR	1137	2	1.47066	168.065	5	b	1	41.0106		41.1579		36.275						37.5331				37.5337					75.0659	35.184		18.3719	37.5093				19.3308		30.9709
GAS1-N40GS	FFYSNN[1.1137]GSQFYIR	1137	2	1.47066	186.076	6	b	1													74.9047							37.5288							37.5343		72.0229
GAS1-N40GS	FFYSNN[1.1137]GSQFYIR	1137	2	1.47066	204.087	7	b	1		6.52569		37.3548		33.4408			37.5108			37.5333						36.8722	34.4643				30.9557	37.5305		37.5341			64.4617
GAS1-N40GS	FFYSNN[1.1137]GSQFYIR	1137	2	1.47066	366.139	8	b	1	37.5077				37.5333			37.5333								14.075		33.8152								37.5346
GAS1-N40GS	FFYSNN[22.1137]GSQFYIR	1137	2	22.1977	127.039	1	b	1	178.84	23.0617	95.1848		56.125		38.8101		68.2432	15.216			29.0307		75.0663			34.6791				32.1707	20.9998	36.4472			161.486
GAS1-N40GS	FFYSNN[22.1137]GSQFYIR	1137	2	22.1977	138.055	2	b	1		96.8851	57.96	111.416		84.4294	90.0798		69.6992	91.3982	58.2136	133.026	37.5995	22.6623			15.0814	99.8533		32.9959	44.6131			80.2335	18.2339		116.627	123.055	107.407
GAS1-N40GS	FFYSNN[22.1137]GSQFYIR	1137	2	22.1977	145.049	3	b	1	115.734	24.2448		19.8978	151.945	310.475	69.2403	160.295	183.756	110.72	14.4426	17.5904	15.0385	57.0958			45.3244	44.1579			74.2452		50.5842	37.7694					35.8415
GAS1-N40GS	FFYSNN[22.1137]GSQFYIR	1137	2	22.1977	163.06	4	b	1	119.752	40.9647		16.3861	136.01		174.462		58.6531		122.294		25.1726	82.5381		55.583			28.8595		76.8316	93.0838		10.4155				100.605
GAS1-N40GS	FFYSNN[22.1137]GSQFYIR	1137	2	22.1977	168.065	5	b	1	140.213	68.3202		124.806	57.0673			97.1152			105.078	45.9794	141.088	117.195	37.5334		98.0344	166.428	77.9181	77.976	37.93			65.5562	30.7355	130.334	95.6322	29.8043
GAS1-N40GS	FFYSNN[22.1137]GSQFYIR	1137	2	22.1977	186.076	6	b	1	107.379	351.939	43.4647	60.2672	163.273	42.0103	19.4052	175.117	94.2277	99.0271	67.6308					12.4287	197.283			30.8289	76.5424				46.4005	36.0631			50.2495
GAS1-N40GS	FFYSNN[22.1137]GSQFYIR	1137	2	22.1977	204.087	7	b	1	12.7873	216.543				94.1395	95.2941	135.642								46.6304	108.921	189.932	13.2607	70.4706	86.7327	57.8972	74.128	32.9962		17.2667	94.072		66.8133
GAS1-N40GS	FFYSNN[22.1137]GSQFYIR	1137	2	22.1977	366.139	8	b	1		70.2556		22.9123	147.198	142.003			49.7637		141.819		75.3441		14.1729	85.3562	144.24		46.9616	99.119			160.016	94.6078	37.5335	186.268		64.9567	68.6386
GAS1-N40GS	FFYSNN[6.1137]GSQFYIR	1137	2	5.5662	127.039	1	b	1	82.2401	37.5338	38.8229	68.2826	116.828	160.179	36.6155	11.7771	82.5017		46.8545	195.309	79.9799		37.5322	18.1141			112.591		112.578	36.795		64.3678			37.5325	23.2962	20.9616
GAS1-N40GS	FFYSNN[6.1137]GSQFYIR	1137	2	5.5662	138.055	2	b	1		37.5338		37.5332			37.2484		37.5088	16.4579		22.1806		30.8345		37.5323	75.0683					37.5328	23.5686			37.5089
GAS1-N40GS	FFYSNN[6.1137]GSQFYIR	1137	2	5.5662	145.049	3	b	1	78.9591	32.6786	103.089			16.6623	36.2239		143.151	54.6482	102.993	31.9954	30.7185	41.046	80.4997	35.5934	31.8241		191.425	125.871	134.971	145.716	18.7558				75.0613		75.0369
GAS1-N40GS	FFYSNN[6.1137]GSQFYIR	1137	2	5.5662	163.06	4	b	1	178.227	356.723	112.566	273.718	225.722				205.109	29.5418	37.5332	193.059	424.557		114.341	170.03	333.146	36.84	74.146	124.371	162.636	273.276		47.9611			110.764	53.313	246.363
GAS1-N40GS	FFYSNN[6.1137]GSQFYIR	1137	2	5.5662	168.065	5	b	1	75.0626			25.1091	37.5332	37.5227				10.7324	37.3897	37.5329						29.9552			37.5295	37.5098		37.5328		26.924
GAS1-N40GS	FFYSNN[6.1137]GSQFYIR	1137	2	5.5662	186.076	6	b	1	37.5299	68.3414						36.6718	37.5074		112.543		37.5305					37.5868							37.5334		37.4685	12.0878	36.8719
GAS1-N40GS	FFYSNN[6.1137]GSQFYIR	1137	2	5.5662	204.087	7	b	1		35.1835	29.6741	33.4765			23.1859	61.6755		15.9887	29.2851		77.2673	69.9425	34.5776			39.4979	128.823	74.1939							40.5307		38.0056
GAS1-N40GS	FFYSNN[6.1137]GSQFYIR	1137	2	5.5662	366.139	8	b	1										26.6674				36.7682				41.0202					31.0531	37.5329	37.5333	36.8726	37.2488
GAS1-N40GS	FFYSNN[9.1137]GSQFYIR	1137	2	9.34127	127.039	1	b	1	369.495		2968.24	60.0512		2653.66		76.925	143.392			835.214	1965.81	918.066		1142.03		1373.88	1023.98		532.132		604.012	589.809		918.861	116.925		332.479	2517.9
GAS1-N40GS	FFYSNN[9.1137]GSQFYIR	1137	2	9.34127	138.055	2	b	1	49.4781			100.276	221.875			60.8084						79.742	78.0172	94.1101	43.7998			379.964		318.879	1015.6	639.084		1431.87	1256.89			1813.17
GAS1-N40GS	FFYSNN[9.1137]GSQFYIR	1137	2	9.34127	145.049	3	b	1	874.69		2617.7			3773.3		599.398	1083.62	23.1025		753.552	3535.08	272.157		1719.74		1649.08	1187.23				933.264	906.193		622.8	1389.5			3991.26
GAS1-N40GS	FFYSNN[9.1137]GSQFYIR	1137	2	9.34127	163.06	4	b	1	727.684		4354.24			4295.07		524.235	544.193				6777.37			1688.79		3419.11	2498.33		681.956		1572.62	1484.35		1298.65	945.955			4344.42
GAS1-N40GS	FFYSNN[9.1137]GSQFYIR	1137	2	9.34127	168.065	5	b	1	98.0346			87.2031					113.445	33.1449					14.6615		105.359			142.005			550.714	285.704		511.8	469.201	11.4957
GAS1-N40GS	FFYSNN[9.1137]GSQFYIR	1137	2	9.34127	186.076	6	b	1	82.2582			102.352	391.52			155.625				228.185		224.256		140.286	182.97		344.959	118.634			293.546	353.334		379.925	432.661	207.808	42.4169	1180.22
GAS1-N40GS	FFYSNN[9.1137]GSQFYIR	1137	2	9.34127	204.087	7	b	1	95.7237					282.35		52.6295	262.479	288.252		188.982		89.1169		134.426	40.4781			277.936		94.2676	1761.58	1672.92		1204.22	1280.08	30.2457	44.3863	3150.48
GAS1-N40GS	FFYSNN[9.1137]GSQFYIR	1137	2	9.34127	366.139	8	b	1	169.199			413.545	105.79					101.314		25.2627		112.071	47.1363								629.652	246.915		589.113	358.486	15.1035		1988.4
GAS1-N40GS	FFYSNN[1.1112]GSQFYIR	1112	2	0.784265	127.039	1	b	1	115.974			78.8384			75.0662		37.5299		75.0641	37.5337			37.5299	35.1843		37.5328	64.7421					37.267				75.0624
GAS1-N40GS	FFYSNN[1.1112]GSQFYIR	1112	2	0.784265	138.055	2	b	1		36.5192		37.5074	36.0899	75.4622		37.3882			74.8975	29.6472		36.7196	7.86606		26.9241				33.1848	35.1836	37.4967				36.7094			37.3598
GAS1-N40GS	FFYSNN[1.1112]GSQFYIR	1112	2	0.784265	145.049	3	b	1	37.5369	14.6784	68.3254			37.4282			37.5337		37.5336						37.5327		37.5346							29.676		37.7756	26.9252	112.6
GAS1-N40GS	FFYSNN[1.1112]GSQFYIR	1112	2	0.784265	163.06	4	b	1				37.3894	37.5295		37.5334								19.0673	66.3587	37.5311	5.80347	29.6039	15.1368			36.3506		34.7455	37.5345		37.5301		34.7313
GAS1-N40GS	FFYSNN[1.1112]GSQFYIR	1112	2	0.784265	168.065	5	b	1		37.5342					37.5338						75.0681	45.1608							90.9868	36.7996						19.2376
GAS1-N40GS	FFYSNN[1.1112]GSQFYIR	1112	2	0.784265	186.076	6	b	1								74.2255		37.2505			67.2525	37.3892			37.3699		37.5345			37.3768
GAS1-N40GS	FFYSNN[1.1112]GSQFYIR	1112	2	0.784265	204.087	7	b	1		51.2228		44.8585		10.7454				78.4568		34.7458	37.5274	74.7268		69.2742			22.1197	35.1467	37.5335	37.5088		37.0567	75.0371	37.5339	12.1758		37.5338
GAS1-N40GS	FFYSNN[1.1112]GSQFYIR	1112	2	0.784265	366.139	8	b	1			37.5338					31.0524		37.535				36.3502				37.5328		31.0533		37.3833		35.8118					37.5311
GAS1-N40GS	FFYSNN[20.1112]GSQFYIR	1112	2	20.5113	127.039	1	b	1		56.1383	138.851	81.1986	137.83	14.2611		23.569	47.0354			63.4157	39.9451	40.6299	41.3469	48.9962							29.1877	35.28		23.0179	111.499		63.8976
GAS1-N40GS	FFYSNN[20.1112]GSQFYIR	1112	2	20.5113	138.055	2	b	1	82.4932	147.969	124.081	201.259		54.1225	25.5598	25.7958	88.6377		163.883	126.796	145.685				21.2237	134.407	107.693	41.1505	143.539				136.834	109.128	115.311	8.80969
GAS1-N40GS	FFYSNN[20.1112]GSQFYIR	1112	2	20.5113	145.049	3	b	1		28.7169	68.5916	23.2616	57.2821	184.52	16.1609	22.7791		74.2539	87.7638			136.994	78.4179					39.7768		17.339	107.02					46.9685	42.8199
GAS1-N40GS	FFYSNN[20.1112]GSQFYIR	1112	2	20.5113	163.06	4	b	1	51.9144		160.908	73.255		11.2921				95.1487	35.3346	32.254		36.0394	101.41			60.7585	17.4554		57.1134	34.6423	105.512	72.0254	38.1566	58.339			52.6435
GAS1-N40GS	FFYSNN[20.1112]GSQFYIR	1112	2	20.5113	168.065	5	b	1	74.5817	149.76	86.3787	79.5281	24.6788		32.5782		33.4378		33.2042	113.565	26.6405		49.8417	30.9197	61.9646		63.8038	31.0521	132.856	63.8693	38.141	9.34607	25.4534	53.3833		150.132	29.497
GAS1-N40GS	FFYSNN[20.1112]GSQFYIR	1112	2	20.5113	186.076	6	b	1	232.514			122.199	17.4625	75.9821	7.90927	66.2852	254.836	31.2277	86.7127	244.711	19.6644	86.5811		92.7612			36.9745	58.2698	111.579	34.5542	47.1905			254.736	110.432	36.6237
GAS1-N40GS	FFYSNN[20.1112]GSQFYIR	1112	2	20.5113	204.087	7	b	1		287.253		262.404	14.8588	75.3725			143.759	53.4402	166.276	180.885		268.157		38.8526	68.7402	97.2965	53.7887		79.5621	62.3087			79.3842	83.4359		20.6814	75.3618
GAS1-N40GS	FFYSNN[20.1112]GSQFYIR	1112	2	20.5113	366.139	8	b	1	433.03	421.462	241.503	489.973			86.8527	158.484	28.0078		411.37	83.8624	16.5412				80.825	205.1	25.9858		14.9084	42.493				115.057	66.8644	171.837
GAS1-N40GS	FFYSNN[25.1112]GSQFYIR	1112	2	24.1978	127.039	1	b	1	66.8221					32.6125	9.20683					13.8447	75.4813	19.2935				115.347				37.5346			4.12517			31.053		72.1981
GAS1-N40GS	FFYSNN[25.1112]GSQFYIR	1112	2	24.1978	138.055	2	b	1		129.754	37.5092		65.0675	52.5268			23.5681	27.8503		35.184	26.9257						32.9361											345.154
GAS1-N40GS	FFYSNN[25.1112]GSQFYIR	1112	2	24.1978	145.049	3	b	1		24.3818	26.9249	41.3496	14.7163		37.5093	75.0394										11.6333					74.2967		22.9563	37.5953		56.7021
GAS1-N40GS	FFYSNN[25.1112]GSQFYIR	1112	2	24.1978	163.06	4	b	1	23.5678			97.916		25.1084	40.1402	74.8981					84.6559		12.744		74.274	36.769									69.8254	19.9252	33.3562
GAS1-N40GS	FFYSNN[25.1112]GSQFYIR	1112	2	24.1978	168.065	5	b	1				14.0767			37.3891			37.3899		107.209	37.5328	23.5689	28.9243				36.8621	36.8701									75.0753	88.5408
GAS1-N40GS	FFYSNN[25.1112]GSQFYIR	1112	2	24.1978	186.076	6	b	1	43.7418	20.0801		31.0529			64.3007										24.2462			29.567				35.2589		37.5344				36.3348
GAS1-N40GS	FFYSNN[25.1112]GSQFYIR	1112	2	24.1978	204.087	7	b	1	31.0519	103.473		20.998		74.8983	72.2435		68.1804				258.12				61.7291	36.8489	37.5101			73.6353			14.0749		29.2747		64.819	56.7682
GAS1-N40GS	FFYSNN[25.1112]GSQFYIR	1112	2	24.1978	366.139	8	b	1				28.7357		50.0387		36.8185	7.97919				75.0661	23.5689	28.8941				35.5946				35.1835	5.9431		37.5344	35.1844			65.2384
GAS1-N40GS	FFYSNN[22.1112]GSQFYIR	1112	2	21.5537	127.039	1	b	1	47.0453	73.0621	66.5461	94.3968				31.0528	34.5417	30.9602	37.5353	42.2278		20.0768		187.665	37.0381		29.6754	30.649	59.1704			109.993	36.3931	8.86447	33.8621		33.476	163.04
GAS1-N40GS	FFYSNN[22.1112]GSQFYIR	1112	2	21.5537	138.055	2	b	1	104.871	57.9451	50.4849	34.6222	202.715	166.138						24.081		108.888	188.064	27.8363	20.3785					37.4882	98.9549	64.9052	35.1851			34.8451	65.8093
GAS1-N40GS	FFYSNN[22.1112]GSQFYIR	1112	2	21.5537	145.049	3	b	1	38.7302	67.0378		23.8693	78.3582	78.1532	38.4717	107.57	19.2739	48.3766	120.396	33.4767		87.1185	89.5983		30.3673	74.8972	42.7109				42.1626				111.136	28.7628		439.123
GAS1-N40GS	FFYSNN[22.1112]GSQFYIR	1112	2	21.5537	163.06	4	b	1	74.4284	71.8985	11.8982		105.764	150.52	33.479			36.765			109.9	41.756	61.1718	37.6058			35.7039		25.9303	29.6743		85.763		70.6629	19.672	121.791	40.9028
GAS1-N40GS	FFYSNN[22.1112]GSQFYIR	1112	2	21.5537	168.065	5	b	1		68.5974			35.036	72.8433		53.0262		45.3186	139.517		15.8048	62.1191	125.849		27.7613	9.11114		34.3313	44.5371		31.9439	132.385	29.3104		33.0093			407.722
GAS1-N40GS	FFYSNN[22.1112]GSQFYIR	1112	2	21.5537	186.076	6	b	1	364.122				23.268	66.7362	91.791	23.3696			207.679	86.4633	26.4317	34.3581		20.4448		5.50451		75.0558			30.2179	88.2855	84.4421			25.0089		55.4009
GAS1-N40GS	FFYSNN[22.1112]GSQFYIR	1112	2	21.5537	204.087	7	b	1		23.641	79.0458	42.6806	50.957	109.395		111.065			17.7758	203.576	156.012			44.234	119.518	186.123	115.825	107.236	64.6078	106.52	147.625	24.7554	109.561	18.0842	81.7875	30.0917	126.576	248.24
GAS1-N40GS	FFYSNN[22.1112]GSQFYIR	1112	2	21.5537	366.139	8	b	1	396.455	169.778			235.299		11.0398		97.2676				192.707	145.697	132.427		26.9123	141.408	17.3151	47.4567		55.5703		96.832	130.03	20.4001			112.411
GAS1-N40GS	FFYSNN[5.1112]GSQFYIR	1112	2	5.61291	127.039	1	b	1		37.534		42.9889	30.4683	34.4779	35.1836	97.0529	15.5354	7.9505	68.0639		72.9008	37.533		120.617			110.211			73.6945	40.6399	37.5298	75.0658	62.5554	36.5522	37.2683	37.5073	75.0662
GAS1-N40GS	FFYSNN[5.1112]GSQFYIR	1112	2	5.61291	138.055	2	b	1	37.5092	75.2713		26.3964		34.4207	20.1172			65.7262	65.3936	24.7521	145.613	20.4412	81.3521	71.6402		112.6	37.4652	37.4887		37.5339	75.4803		27.9893
GAS1-N40GS	FFYSNN[5.1112]GSQFYIR	1112	2	5.61291	145.049	3	b	1		37.534	26.4602	113.625			16.2333	62.0944		37.5307	38.4726	37.2494			30.6696	36.8701		30.698	72.0249	33.1113	17.1773	27.849	56.5773	112.568		34.8584		36.3505	39.0896	69.6942
GAS1-N40GS	FFYSNN[5.1112]GSQFYIR	1112	2	5.61291	163.06	4	b	1	90.3356		38.3311		38.2234		36.8709			28.049	58.2368			87.3503		74.2237	37.5335	39.7806	111.017		39.4264		36.7668	13.4194		112.412	75.8134	33.3888		76.7557
GAS1-N40GS	FFYSNN[5.1112]GSQFYIR	1112	2	5.61291	168.065	5	b	1		31.1735		37.5336	37.5332	37.3883	65.4686				36.9238	35.183		58.2802	37.509						26.8446			37.3879		39.2517			37.5089
GAS1-N40GS	FFYSNN[5.1112]GSQFYIR	1112	2	5.61291	186.076	6	b	1	18.7014				38.9309		36.8711	36.8716		4.53558					26.9243		15.8012			32.8396
GAS1-N40GS	FFYSNN[5.1112]GSQFYIR	1112	2	5.61291	204.087	7	b	1	28.1141	106.339	103.091		65.9696	74.8614	64.2869		15.5282	36.8713		37.3527	59.6266	102.625			40.4055	56.1666	74.8987	26.9202	75.0392	38.0518			37.5065			34.6575	149.938
GAS1-N40GS	FFYSNN[5.1112]GSQFYIR	1112	2	5.61291	366.139	8	b	1			37.5087	74.8751					14.0764	35.183			38.1276								57.2911		37.5328	74.637		37.5091			33.2519
GAS1-N40GS	FFYSNN[30.1112]GSQFYIR	1112	2		127.039	1	b	1
GAS1-N40GS	FFYSNN[30.1112]GSQFYIR	1112	2		138.055	2	b	1
GAS1-N40GS	FFYSNN[30.1112]GSQFYIR	1112	2		145.049	3	b	1
GAS1-N40GS	FFYSNN[30.1112]GSQFYIR	1112	2		163.06	4	b	1
GAS1-N40GS	FFYSNN[30.1112]GSQFYIR	1112	2		168.065	5	b	1
GAS1-N40GS	FFYSNN[30.1112]GSQFYIR	1112	2		186.076	6	b	1
GAS1-N40GS	FFYSNN[30.1112]GSQFYIR	1112	2		204.087	7	b	1
GAS1-N40GS	FFYSNN[30.1112]GSQFYIR	1112	2		366.139	8	b	1
GAS1-N40GS	FFYSNN[16.1112]GSQFYIR	1112	2		127.039	1	b	1		192.379	209.829		1213.34		240.073	493.927	105.593				1063.94	407.624	264.909	319.763	675.176	890.177	589.406	366.151	179.812	845.13	50.2412	551.598	550.207	613.437	2063.74	1530.24	2109.28	3410.38
GAS1-N40GS	FFYSNN[16.1112]GSQFYIR	1112	2		138.055	2	b	1		1894.4		1126.54			1225.78	1025.89	1420.37				1875.95	1951.44	2439.7	1780.6	2535.26	2815.42		683.328	1426.26	2366.6	334.299	1550.36	808.355	2655.24	3145.22	2540	3873.17	64686.6
GAS1-N40GS	FFYSNN[16.1112]GSQFYIR	1112	2		145.049	3	b	1		1001.6		647.404			876.78	727.541	878.014		41.8317		2145.04	951.054	262.097	759.208	1163.83	2001.62	532.33	785.754	936.553	506.892	398.452	715.479	393.309	2367.61	2947.68	2638.11	3333.08	5900.98
GAS1-N40GS	FFYSNN[16.1112]GSQFYIR	1112	2		163.06	4	b	1		553.237		1355.96			938.689	1159.48	1275.84				3583.98	3424.79	1920.01	1394.3	4215.54	2249.07		1038.24		1250.56	366.632	1062.97	446.318	4108.32	5195.23	3793.84	5495.92	8200.78
GAS1-N40GS	FFYSNN[16.1112]GSQFYIR	1112	2		168.065	5	b	1		455.621		1336.6			1196.77	696.235	878.894		49.9888	336.021	1132.1	568.949	930.678	693.457	1295.95	1001.34		722.685	691.545	1643.03	108.943	1450.2	489.577	2072.91	2007.35	2163.48	2113.11	33499.8
GAS1-N40GS	FFYSNN[16.1112]GSQFYIR	1112	2		186.076	6	b	1		1035.32	1269.89	438.015	259.479			581.927	340.764		186.761	1044.92	599.011	958.922	535.181	557.162	904.782	653.178		627.33	659.863	391.858	86.8836	758.999	453.167	814.287	1068.86	1055.7	1015.66	15543.4
GAS1-N40GS	FFYSNN[16.1112]GSQFYIR	1112	2		204.087	7	b	1		2269.89		1902.78			1843.53	1764.56	2106.07				3724.16	2377.59	2272.69	2305.25	4730.35	2448.26		1016.49	1469.12	2229.94	134.586	1735.9	1490.28	3609.57	5429.14	4755.57	5288.48	50480.9
GAS1-N40GS	FFYSNN[16.1112]GSQFYIR	1112	2		366.139	8	b	1		604.127		803.139			1291.47	989.561	1326.44				856.743	1418.82	1026.75	592.41	2281.13	1958.93		293.484	793.341	962.771	223.206	1853.7	924.786	1564.22	1585.76	1946.39	2011.1	41343.7
GAS1-N40GS	FFYSNN[14.1112]GSQFYIR	1112	2	14.4447	127.039	1	b	1	5825.99	773.86	5354.15	5154.69	12567.3	17045.4	3602.3	3384.79	4295.27	4950.95	175.469	6926.39	13602.7	10567.5	3658.4	1445.2	10492.6	6289.3	766.923	1082.32	1253.27	630.218	1541.55	697.111	261.786	1333.7	1854.82	2723.39	1439.03	6525.41
GAS1-N40GS	FFYSNN[14.1112]GSQFYIR	1112	2	14.4447	138.055	2	b	1	7913.85	779.773	6884.48	7101.9	15950.5	20548.5	7123.21	4492.73	3834.9	7657.91		10554.6	17608.5	12530.9	5231.67	1693.92	15950.6	8056.77	1069.54	457.131	963.236	2455.04	1635.59			1796.37	2729.2	4146.95	1426.72
GAS1-N40GS	FFYSNN[14.1112]GSQFYIR	1112	2	14.4447	145.049	3	b	1	9745.92	530.165	6648.09	9973.93	20932.7	28459.5	6869.65	6379.9	5357.74	9117.59	651.143	11104.9	23098	19991.1	5396.21	1998.9	20381.5	12041.1	2026.23	1119.89	1524.68	852.359	2970.2	1499.88	1071.85	3144.9	3521.34	6621.45	3027.06	10911.8
GAS1-N40GS	FFYSNN[14.1112]GSQFYIR	1112	2	14.4447	163.06	4	b	1	18142.2	1453.89	13754.8	15662	28430.3	41620.4	17223	8500.43	6722.88	20046.5	1123.32	22565	36922.1	30825.2	9124.18	3234.45	39076.1	17314.6	2932.07	1399.87	3747.95	1934.11	2159.1	3022.86	2124.43	6464.76	7061.31	12496.2	4579.95	23701.2
GAS1-N40GS	FFYSNN[14.1112]GSQFYIR	1112	2	14.4447	168.065	5	b	1	6036.22	188.776	4851.4	5330.52	11206.2	14382.9	4598.44	2860.17	2044.66	5259.48	323.375	7206.22	11310	10735.9	3793.33	1099.67	10077	5037.37	704.506	620.582	2103.18	1010.26	1189.24	885.116	722.127	1084.73	2733.29	4154.77	1818.23	4101.94
GAS1-N40GS	FFYSNN[14.1112]GSQFYIR	1112	2	14.4447	186.076	6	b	1	2089.11	527.664	2216.66	3048.29	5089.82	8319.74	2105.57	1337.01	1815.77	3608.56		2381.24	6589.97	4684.38	1149.74	380.695	5225.34	1455.43	580.261	686.91	338.688	428.64	259.411		441.863	964.472	1450.87	1656.49	538.562	3856.99
GAS1-N40GS	FFYSNN[14.1112]GSQFYIR	1112	2	14.4447	204.087	7	b	1	14428	1277.53	10437.6	12802.6	29051.1	36511.8	13308.6	8303.83	7435.53	15111.7	1157.08	18925.9	36107.5	26676.3	8639.47	3491.02	31389.5	16215.8	2265.36	1705.34	3611.81	1865.71	1676.14	2011.26	1552.87	3622.71	5262.52	8819.84	3397.48	16653.4
GAS1-N40GS	FFYSNN[14.1112]GSQFYIR	1112	2	14.4447	366.139	8	b	1	5301.03	716.205	3871.08	4882.35	11754.4	14610	5103.26	3822.01	3679.51	4970.28	241.087	5704.24	14649.3	10448.8	3613.41	1160.67	9840.46	5700.83	762.436	1315.36	2267.66	884.533	906.103	875.885	512.057	1105.26	1597.74	3368.94	1473.73	7292.96
GAS1-N40GS	FFYSNN[27.1112]GSQFYIR	1112	2	26.7768	127.039	1	b	1									37.5351										37.5325
GAS1-N40GS	FFYSNN[27.1112]GSQFYIR	1112	2	26.7768	138.055	2	b	1	37.535																					37.3781		37.3869			37.5444		37.3834	23.1207
GAS1-N40GS	FFYSNN[27.1112]GSQFYIR	1112	2	26.7768	145.049	3	b	1						37.4874										36.769											37.547
GAS1-N40GS	FFYSNN[27.1112]GSQFYIR	1112	2	26.7768	163.06	4	b	1																37.5097						37.5453
GAS1-N40GS	FFYSNN[27.1112]GSQFYIR	1112	2	26.7768	168.065	5	b	1	37.5356																							37.5089					27.6275
GAS1-N40GS	FFYSNN[27.1112]GSQFYIR	1112	2	26.7768	186.076	6	b	1																		25.6585
GAS1-N40GS	FFYSNN[27.1112]GSQFYIR	1112	2	26.7768	204.087	7	b	1						37.488												37.533												8.87526
GAS1-N40GS	FFYSNN[27.1112]GSQFYIR	1112	2	26.7768	366.139	8	b	1									32.9371										37.5338											11.3186
GAS1-N40GS	FFYSNN[6.1112]GSQFYIR	1112	2	5.56458	127.039	1	b	1		14.076		6.70272		31.0522	35.8112	100.109		8.94819		37.5338	9.58624	31.0522		106.085	69.0317	35.1496	111.764		20.5156	42.3162	34.0648	37.5298	37.5298	61.2199	48.4491		36.247	74.2197
GAS1-N40GS	FFYSNN[6.1112]GSQFYIR	1112	2	5.56458	138.055	2	b	1	37.5301	42.3781		17.1353	144.142	34.9331			31.1056	66.5109	4.65688			31.0193	75.0657	69.5697		23.569	26.9255			35.184	62.1038		37.6724			16.5053
GAS1-N40GS	FFYSNN[6.1112]GSQFYIR	1112	2	5.56458	145.049	3	b	1	47.4981	14.076	34.047	81.4043	94.2877		76.8582	74.6366		37.5307			191.968		230.182	36.3487	112.272		74.7369	26.9758		33	65.8594			32.5971	6.94158	36.0938		75.0637
GAS1-N40GS	FFYSNN[6.1112]GSQFYIR	1112	2	5.56458	163.06	4	b	1	112.596		37.3831		77.022	6.94608	149.214		37.0638	28.7616		37.5327	49.7562	84.6151	69.2173	74.3734		33.4606	111.702	11.7599	94.6204		30.981	118.655		112.347		37.37	36.3484	74.2342
GAS1-N40GS	FFYSNN[6.1112]GSQFYIR	1112	2	5.56458	168.065	5	b	1				31.0528			25.1085				53.7888	20.4226		38.8341			37.5306	23.569			26.7246			38.0185		20.4532		20.7112	39.255
GAS1-N40GS	FFYSNN[6.1112]GSQFYIR	1112	2	5.56458	186.076	6	b	1	18.8893				28.9422	31.0522	75.0668	37.5338		4.6723			16.5872
GAS1-N40GS	FFYSNN[6.1112]GSQFYIR	1112	2	5.56458	204.087	7	b	1	32.143		99.8484						118.596	37.5331				104.139	37.5331				75.0404	35.1588	74.8976	19.2747			37.533			74.7946
GAS1-N40GS	FFYSNN[6.1112]GSQFYIR	1112	2	5.56458	366.139	8	b	1			37.5328	66.3758	37.3707					36.3495	23.5675									36.8723	78.2828		14.0754	75.0379		37.5332
GAS1-N40GS	FFYSNN[19.1112]GSQFYIR	1112	2	18.3766	127.039	1	b	1			42.0943	90.0673	197.037		107.911		65.7371	94.7404	10.723	37.8086		41.2629	44.0579		24.8297	219.269		68.8423	46.9417	65.2445	12.4896	35.1833		33.6675	74.1289	28.9047
GAS1-N40GS	FFYSNN[19.1112]GSQFYIR	1112	2	18.3766	138.055	2	b	1	100.003	35.731	121.349	135.029	16.0127		100.779	210.942	96.5228	37.2413		93.3045		144.905	77.1629	37.2989	153.002			214.118	144.723	105.872	204.803	37.8573	61.0297	10.5834	59.6156	89.8145	35.5646
GAS1-N40GS	FFYSNN[19.1112]GSQFYIR	1112	2	18.3766	145.049	3	b	1	36.8147	13.2091			123.69			99.1183	84.6191	34.7549	72.0249	52.3515	26.1728	81.2908		187.069	59.6236			74.5097	82.5726	75.8354					13.8009
GAS1-N40GS	FFYSNN[19.1112]GSQFYIR	1112	2	18.3766	163.06	4	b	1			98.9024	6.12608					17.3668	111.936		47.6924		246.89	43.4724		39.1405	117.774			23.9893	10.4737	51.9407		37.4478
GAS1-N40GS	FFYSNN[19.1112]GSQFYIR	1112	2	18.3766	168.065	5	b	1						48.484	108.346	97.9789		108.289	10.611	111.557	105.192	175.29	65.9589	191.71	26.6816	18.677	15.5275	68.3495		6.06325	181.053	163.474	177.544	89.4964		8.24312	92.6185
GAS1-N40GS	FFYSNN[19.1112]GSQFYIR	1112	2	18.3766	186.076	6	b	1		166.581	337.209			164.812		101.843	256.903		5.50447	95.5645	10.1242	42.4438	152.829	37.3697	23.3875	117.805	19.2698	19.1235	6.98278				72.9337	31.538	91.1082	39.1889	31.5431
GAS1-N40GS	FFYSNN[19.1112]GSQFYIR	1112	2	18.3766	204.087	7	b	1	85.4148		196.238	119.891	165.736	221.138		156.036	140.913	287.338		159.35				40.1629	27.3284		58.2291	32.4722	113.336		30.1104	158.335	126.372	174.058	62.7673		6.94572
GAS1-N40GS	FFYSNN[19.1112]GSQFYIR	1112	2	18.3766	366.139	8	b	1	144.754		52.9057	14.4217		151.007		261.408	132.025	124.368		62.2781	46.1607			41.9915			107.962	111.663	176.503	20.9534		138.336	67.1155		65.8667	67.9527	15.4478
GAS1-N40GS	FFYSNN[15.1112]GSQFYIR	1112	2	14.4469	127.039	1	b	1	5809.95	881.995		9688.43	11764.6	18848.4	4742.13	4619.03	3184.43	102.952	2287.88	97.0527	8301.45	5719.96	3184.56	3181.1	9947.6		5235.48	3256.96	3256.11	853.502	1575.04		575.178	1228.67	3431.08	3225.63	7323.92	9486.29
GAS1-N40GS	FFYSNN[15.1112]GSQFYIR	1112	2	14.4469	138.055	2	b	1	8495.83		2440.33	15101.2	20528.9	23822.9	7920.6	6601.41	5350.42		4230.34		12891.2	7441.19	4385.22	6298.6	14578.4		8852.99	3167.28	6987.25	1656.76	580.905		660.033	2612.93	4186.32	4857.02	10041.6
GAS1-N40GS	FFYSNN[15.1112]GSQFYIR	1112	2	14.4469	145.049	3	b	1	10903.2		3305.35	20070.9	27181.1	30393.4	8170.35	9318.47	6396.82	923.387	6963.93	925.706	16823.1	10259.5	4948.7	5776.42	18914.5		8205.62	5049.96	7472.74	917.866	2662.07		1567.2	4529.48	4250.68	7614.39	12829.4	17773.3
GAS1-N40GS	FFYSNN[15.1112]GSQFYIR	1112	2	14.4469	163.06	4	b	1	19875.8			43245.2	50276.1	57717.5	17962.1	16468	13635.9	1510.34	12019.8		34025.4	18325	11271	12597.1	37203.8		16439	11391.7	11828.8	2370.76	4835.54		2171.08	7690.09	10117.4	13145.2	25852.5	32094
GAS1-N40GS	FFYSNN[15.1112]GSQFYIR	1112	2	14.4469	168.065	5	b	1	6090.29		2883.67	10163.5	13119	14145.1	4566.46	4194.15	4269.26		2772.71		8728.79	6076.55	4001.58	3463.81	10001.6	190.224	4596.17	2887.2	2059.84	1104.2	1804.57		658.814	1349.7	3343.69	4234.45	5136.52	2344.22
GAS1-N40GS	FFYSNN[15.1112]GSQFYIR	1112	2	14.4469	186.076	6	b	1	2080.56		1445.96	5691.51	7026.46	9502.16	2412.17	2147.03	1670.49		1411.11		5040.77	3025.53	1766.38	2061.27	5352.95	318.081	3275.66	1586.23	1742.63	377.457			319.279	1518.97	1508.63	2099.45	3452.51	2039.1
GAS1-N40GS	FFYSNN[15.1112]GSQFYIR	1112	2	14.4469	204.087	7	b	1	16243.2		9728.58	32192.8	39973.1	48636.1	14403.8	13598.6	9823.04		10268.2		27867.6	15706.7	9039.86	9355.36	30874.3		14004.3	8881.72	10375.5	1863.19	2034.26		2007.89	5419.51	7644.34	10634.6	19299.5	13299.7
GAS1-N40GS	FFYSNN[15.1112]GSQFYIR	1112	2	14.4469	366.139	8	b	1	6413.01	962.195	2463.53	11315	15203.9	18321.3	4975.3	4812.07	2579.77		2959.78		10592.3	5601.26	3404.27	2666.19	9223.24		5899.51	2537.61	4184.44	654.582	1683.08		503.896	2456.65	2426.44	2839.58	6986.31
GAS1-N40GS	FFYSNN[26.1112]GSQFYIR	1112	2	26.7703	127.039	1	b	1				66.9117	103.542			35.1841	37.3905								36.8723		45.6634											75.0663
GAS1-N40GS	FFYSNN[26.1112]GSQFYIR	1112	2	26.7703	138.055	2	b	1	23.5695		37.5305							37.269			72.1786					37.3887						37.5337		37.5317			37.5279	265.31
GAS1-N40GS	FFYSNN[26.1112]GSQFYIR	1112	2	26.7703	145.049	3	b	1			37.3759	32.3941		37.268	37.5327						29.2369						37.3891								37.5333			26.4881
GAS1-N40GS	FFYSNN[26.1112]GSQFYIR	1112	2	26.7703	163.06	4	b	1														29.6745						37.5343							48.7781	37.5442		49.5218
GAS1-N40GS	FFYSNN[26.1112]GSQFYIR	1112	2	26.7703	168.065	5	b	1	35.1857					37.5339												37.5085						37.533					29.4725	108.646
GAS1-N40GS	FFYSNN[26.1112]GSQFYIR	1112	2	26.7703	186.076	6	b	1						35.717				37.5324										74.2444								37.5482		35.1846
GAS1-N40GS	FFYSNN[26.1112]GSQFYIR	1112	2	26.7703	204.087	7	b	1					23.5681									37.6471						34.0475										37.4117
GAS1-N40GS	FFYSNN[26.1112]GSQFYIR	1112	2	26.7703	366.139	8	b	1							37.5329	31.0527	37.5068								37.5082									37.51				60.0964
GAS1-N40GS	FFYSNN[11.1112]GSQFYIR	1112	2	11.5494	127.039	1	b	1	1314.86	2512.25	1021.06				1957.84		2360.84	938.352	509.486	2281.74				999.499			1726.01			7510.47	6899.1	3969.13	585.612	4016.94	2826.5	922.121	1609.29	1272.18
GAS1-N40GS	FFYSNN[11.1112]GSQFYIR	1112	2	11.5494	138.055	2	b	1	1216.11		3433.4									4136.84	443.86				362.097			829.773		13021.3	11869.4	8756.87	2998.2	8089.52	5154.45
GAS1-N40GS	FFYSNN[11.1112]GSQFYIR	1112	2	11.5494	145.049	3	b	1	2997.7	2036.65					3893.81		1766.3	2803.93	286.877					837.696			2061.76			12904.5	10640.8	7013.86	2220.6	6299.24	5189.43	482.187	2112.26	1981.27
GAS1-N40GS	FFYSNN[11.1112]GSQFYIR	1112	2	11.5494	163.06	4	b	1	5485.55	5572.42					5361.16		4707.55	2942.5						521.842			3859.98			19081.1	15021.4	9035.79	2572.96	7769.24	5891.01		2129.49	5688.4
GAS1-N40GS	FFYSNN[11.1112]GSQFYIR	1112	2	11.5494	168.065	5	b	1	680.325								263.472	548.936		2150.95					409.607	370.161		200.309		8157.02	8119.16	6567.24	1934.23	5201.32	3905.33
GAS1-N40GS	FFYSNN[11.1112]GSQFYIR	1112	2	11.5494	186.076	6	b	1		304.74	1338.21				719.331		278.325			793.164	475.423									4261.22	3187.85	2420.24	908.333	3163.37	2096.89	77.851
GAS1-N40GS	FFYSNN[11.1112]GSQFYIR	1112	2	11.5494	204.087	7	b	1	3669.15		3698.38									4372.07	611.384			177.236	2685.39	3683.34		267.728		18390.8	15618.3	11414.4	4243.74	11348.1	9685.14
GAS1-N40GS	FFYSNN[11.1112]GSQFYIR	1112	2	11.5494	366.139	8	b	1	226.843		1039.65								80.3701	1808.26	690.07			259.984		291.178		432.194		6317.76	5185.13	4710.28	1937.09	4573.1	3344.31	118.796	102.928
GAS1-N40GS	FFYSNN[10.1112]GSQFYIR	1112	2	10.0655	127.039	1	b	1	1205	867.855	135.215	1691.79	1381.88	1811.28	786.476	408.784	673.214	774.899	1439.89	1258.95	472.25		744.451	1215.4	2892.59	1660.71	1323.41	1223.72	744.168	1885.12	3142.98	4141.75	442.404	674.046	629.336	1400.63	1435.55	170.361
GAS1-N40GS	FFYSNN[10.1112]GSQFYIR	1112	2	10.0655	138.055	2	b	1	825.653	660.047	793.884	2090.78	2243.25	1923.94	1317.27		509.198	1083.92	736.962	1167.28	416.033				4724.59	1301.24	1997.53	1612.78	1626.43			10380.5						185.57
GAS1-N40GS	FFYSNN[10.1112]GSQFYIR	1112	2	10.0655	145.049	3	b	1	923.308	564.936	309.587	2602.72	2322.28	2614.01	1402.31	55.4814	496.872	1202.53	1129.79	875.651	1509.9		352.272	887.849	5127.68	1955.18	1872.71	1489.7	2122.36	2717.66	3487.74	8284.18	1107.21	1303.36	1840.27	900.134	1773.45	128.458
GAS1-N40GS	FFYSNN[10.1112]GSQFYIR	1112	2	10.0655	163.06	4	b	1	1300.7	1512.29	1396.97	3145.96	3336.39	4332.07	1955.97	199.26	983.407	1675.35	1381.03	975.744	2035.96		378.383	945.246	7619.29	3459.78	3345.11	1745.23	2141.44	2979.33	2978.07	10118.5	480.838	1361.97	1203.2	897.467	2366.55	325.373
GAS1-N40GS	FFYSNN[10.1112]GSQFYIR	1112	2	10.0655	168.065	5	b	1	261.409	726.897	555.616	2017.81	927.984	1241.46	793.574	46.1739	612.194		469.446	750.05	90.8532	113.782			2512.45	1242.02	1201.55	1200.46	821.366			8139.09						498.239
GAS1-N40GS	FFYSNN[10.1112]GSQFYIR	1112	2	10.0655	186.076	6	b	1	883.771	847.853		532.287	753.637	638.989	429.681			987.95	551.589	571.472					1494.5		738.902	229.175	485.904			2270.31				227.411
GAS1-N40GS	FFYSNN[10.1112]GSQFYIR	1112	2	10.0655	204.087	7	b	1	2411.47	2271.87	1938.33	3797.12	3926.75	4454.31	2923.9	103.845	1098.41	981.307	1618.16	1615.96	729.826	48.6422		454.883	5187.31	3611.42	2194.19	2646.89	2221			12025.7						270.582
GAS1-N40GS	FFYSNN[10.1112]GSQFYIR	1112	2	10.0655	366.139	8	b	1	637.93	214.681	295.141	911.505	1155.1	1056.04	1457.38	18.4245	226.725	331.411	287.795	785.401	382.565			129.701	1807.42	1082.68	829.628	936.923	280.247	326.513	1526.68	5865.99				271.162	395.463
GAS1-N40GS	FFYSNN[12.1112]GSQFYIR	1112	2	12.2174	127.039	1	b	1	7379.44	8184.51	12345.2	21582.5	56314.9	53123.1	1188.03	860.209	1631.17	13796.7	753.95	18073.7	31364.7	1219.25	1705.91	11327.4	33365.4	1834.43	8956.81	379.62	1045.05	2179.62	906.169	1662.72	3221.94	13013.2	18166.2	2631.26	2221.46	46467.6
GAS1-N40GS	FFYSNN[12.1112]GSQFYIR	1112	2	12.2174	138.055	2	b	1	15122.4	17586.5	21797.2	41133.8	113816	106008				24269.7	835.897	35145.2	57627.9			25817.3	58150	1052.91	22229.8			4329.62			5977.43	20301	28113.4			90867.2
GAS1-N40GS	FFYSNN[12.1112]GSQFYIR	1112	2	12.2174	145.049	3	b	1	14337.8	16807.9	22244.3	39181.2	98483.5	94681.1	2244.73	1568.74	1636.81	23542.3		32542.6	56406.5	2161.75	1684.53	22413.5	53133.4	3941.06	20880.8	2048.58	3053.69	3372.92	2808.13	1967.76	4267.89	20072.1	32344.9	3824.71	3065.03	81854.4
GAS1-N40GS	FFYSNN[12.1112]GSQFYIR	1112	2	12.2174	163.06	4	b	1	20242.9	23744.7	27261.5	54816.4	152196	142039	4280.78	2963.66	3221.09	32709.3		46294.6	78706.6	4972.11	2783.71	33599.1	80279.8	7048.69	24965.9	3108.21	3123.77	6259.4	4051.58	2343.15	7719.17	27442	48802.1	7220.21	6387.26	134220
GAS1-N40GS	FFYSNN[12.1112]GSQFYIR	1112	2	12.2174	168.065	5	b	1	12271.5	12356.5	14838	32040.5	75878.9	72377.2				17346.8	340.074	24662.4	41763.7			16921.6	41635.9		15951.5		202.111	2864.28			3251.21	13427.1	16961.5			58321.9
GAS1-N40GS	FFYSNN[12.1112]GSQFYIR	1112	2	12.2174	186.076	6	b	1	6220.74	5342.04	9539.77	14542.2	38576.8	35130.2	315.189		108.248	8396.61	160.178	12652.1	22044.3	716.16	322.169	7836.2	21793.1	1071.25	7153.87			1314.31	535.231	276.275	1589.86	7487.5	8957.69			30109.6
GAS1-N40GS	FFYSNN[12.1112]GSQFYIR	1112	2	12.2174	204.087	7	b	1	32334.4	31437.9	41870.7	90337.8	219182	204737				47850.6		69541.2	124821			46543.6	120745		38524.7			6114.93			8346.99	37570.3	44032			172654
GAS1-N40GS	FFYSNN[12.1112]GSQFYIR	1112	2	12.2174	366.139	8	b	1	13580.5	13952.5	16009.3	32381.1	73990.7	72288.6				17916.1		25228	48811.9			17285.9	43533.1		14256.2			1256.11		107.147	3758.29	14910	15331.1			55573.7
GAS1-N40GS	FFYSNN[9.1112]GSQFYIR	1112	2		127.039	1	b	1		98.0763	1652.41						102.556						500.311					710.452						98.6744		1031.96		5529.99
GAS1-N40GS	FFYSNN[9.1112]GSQFYIR	1112	2		138.055	2	b	1		145.305					26.0464				106.304				77.0463						136.575			64.7646	69.7166			83.1806		6068.7
GAS1-N40GS	FFYSNN[9.1112]GSQFYIR	1112	2		145.049	3	b	1			1317.24	506.31					343.081						428.26				181.247					924.143				815.464		7380.26
GAS1-N40GS	FFYSNN[9.1112]GSQFYIR	1112	2		163.06	4	b	1			1187.04						428.682						770.362				614.858	254.565				663.998				993.331		8675.95
GAS1-N40GS	FFYSNN[9.1112]GSQFYIR	1112	2		168.065	5	b	1				27.9829			75.8462		129.164		134.374	214.417		125.845	46.9889				155.274									60.7632		3695.42
GAS1-N40GS	FFYSNN[9.1112]GSQFYIR	1112	2		186.076	6	b	1							453.95							61.2926						547.307					23.6062	307.798		255.917		3149.31
GAS1-N40GS	FFYSNN[9.1112]GSQFYIR	1112	2		204.087	7	b	1			88.4063						576.481			95.2343		40.0002	224.398					293.801	44.6411				21.6793	234.275		121.558		10236
GAS1-N40GS	FFYSNN[9.1112]GSQFYIR	1112	2		366.139	8	b	1		90.0693	237.19	97.2583					49.8907		30.0291			144.758	106.8						85.0538				138.303			167.559		3312.51
GAS1-N40GS	FFYSNN[21.1112]GSQFYIR	1112	2	21.5461	127.039	1	b	1	46.3276	22.7943	67.1978	85.7724	137.091			36.7681		32.2722	70.1872		65.3501		9.32309	184.595	34.6018			14.2221		63.4148			26.2708	59.366	18.1767		33.395
GAS1-N40GS	FFYSNN[21.1112]GSQFYIR	1112	2	21.5461	138.055	2	b	1	209.711		55.9821	171.506	8.70341		22.8102		53.693	54.7092	133.621	92.3788	159.631	25.8699	274.847	31.9659	61.9935		116.317	123.032		21.1445	86.638		65.3939	16.6554		129.684
GAS1-N40GS	FFYSNN[21.1112]GSQFYIR	1112	2	21.5461	145.049	3	b	1	25.1262				106.583		74.273					64.7445		22.7972	275.815			75.0388		74.9436			38.1095	37.6639		156.128	112.386	37.3338	75.0728
GAS1-N40GS	FFYSNN[21.1112]GSQFYIR	1112	2	21.5461	163.06	4	b	1	53.9698	20.9835	13.1143	150.774		152.848	83.1217	76.0261	71.6161		247.759	97.6308		63.7047	86.2717	33.5757	42.9322		55.5523	35.5491	94.1638			74.1136			20.0004	108.891	74.0643
GAS1-N40GS	FFYSNN[21.1112]GSQFYIR	1112	2	21.5461	168.065	5	b	1			38.9434	90.6138	36.5147			115.484		15.0142	22.2027	96.2811	28.1759	78.2827				29.7998	107.481	34.6991	112.214	13.6689	7.87474			25.5295	33.0025		33.2371
GAS1-N40GS	FFYSNN[21.1112]GSQFYIR	1112	2	21.5461	186.076	6	b	1	287.012		232.026	137.369	24.4802	59.2009		10.8221		45.309	40.8381		72.9989		28.6902	35.1032	73.7619		77.4709				34.859	33.377	58.9806	13.6618		27.7208
GAS1-N40GS	FFYSNN[21.1112]GSQFYIR	1112	2	21.5461	204.087	7	b	1		168.261	39.1462	86.3943	16.5377	142.502	95.7671			155.419		131.808	49.356	250.035	54.1569	46.7728	159.429	207.064	100.957		96.3088	36.7191	100.243	86.1765	21.744		107.419		71.8652
GAS1-N40GS	FFYSNN[21.1112]GSQFYIR	1112	2	21.5461	366.139	8	b	1	272.418						14.6926		33.7625	324.247	139.797	246.153					73.0513	130.965	26.9256	25.433		36.3891		28.2934		114.592		90.7795	107.813
GAS1-N40GS	FFYSNN[8.1112]GSQFYIR	1112	2	7.75944	127.039	1	b	1	1090.73	1318.65		294.642	3365.17		2159.7	830.69	1273.6	568.319	420.838	1860.1	2151.93			2398.74	704.186	1392.02			943.921	1674.93	2297.57	305.182	1212.64	1007.25	91.4721	663.639	582.934
GAS1-N40GS	FFYSNN[8.1112]GSQFYIR	1112	2	7.75944	138.055	2	b	1	2350.7	1517.71	2346.92	544.42		1976.85	2021.85	1185.4	1225.74	1907.27	2428.96	1802.6	871.05	640.345			981.977		100.238	444.544	922.212	514.502			201.65	278.869	544.76	966.555	1537.46
GAS1-N40GS	FFYSNN[8.1112]GSQFYIR	1112	2	7.75944	145.049	3	b	1	2561.78	1318.92	469.138	143.397	3631.56	1415.08	1774.06	2170.2	1553.45	1266.01	934.147	3394.18	5467.11	1416.87	111.839	2078.75	770.258	1778.34	293.373	596.694	1074.03	1753.09	2286.74		891.132	1452.61		1353.03
GAS1-N40GS	FFYSNN[8.1112]GSQFYIR	1112	2	7.75944	163.06	4	b	1	6266.44	5192.01	4184.92		2231.45	2916.9	4423.25	3483.59	1771.07	2696.68	3486.4	4679.53	2313.05	2287.74	363.026	2369.52	1057.92			2110.16	2368.5	1581.52	1794.71	260.575	1116.48	1957.66	52.0727	4424.88	2618.91	2707.83
GAS1-N40GS	FFYSNN[8.1112]GSQFYIR	1112	2	7.75944	168.065	5	b	1	955.289	914.484	1806.96			932.464	992.651	1208.99	965.818	1278.96	1376.14	1630.32	1001.8	767.681	239.937		369.707			233.314	695.198	276.966	242.534		189.453	136.098		844.249	281.368
GAS1-N40GS	FFYSNN[8.1112]GSQFYIR	1112	2	7.75944	186.076	6	b	1		1305.85	1919.63	432.366	362.947	510.793	1005.66	826.565	812.582	1105.1		1383.7	303.353	714.935		396.186	295.07		473.057	292.362		650.791		273.763	332.076	265.505	179.164	2339.95	679.372
GAS1-N40GS	FFYSNN[8.1112]GSQFYIR	1112	2	7.75944	204.087	7	b	1	6096.97	6403.99	4961.51	1027.29		4431.46	3560.74	4703.63	4198.7	2901.68	4430.32	5123.32	2395.43	1496.18	195.07	738.648	2639.05	969.586	189.175	1577.64	2432.17	750.801	559.252	501.543	616.804	395.305		1805.51	1704.09
GAS1-N40GS	FFYSNN[8.1112]GSQFYIR	1112	2	7.75944	366.139	8	b	1	1962.54	1367.69	2209.29			1489.48	1884.04	1301.88	1265.44	1567.13	875.102	2471.57	818.802	902.095		456.419	932.862		44.9178	779.025	1176.17		302.61	292.531	340.525	750.204		648.567	980.423	582.262
GAS1-N40GS	FFYSNN[4.1112]GSQFYIR	1112	2	3.80164	127.039	1	b	1	44.7338	7.45163	37.1981	6.35843	51.4374	16.5062	37.5335		51.7888	27.1819	81.4351		7.75828	37.5098			68.5577	37.5326					37.3883				32.1584	23.5681	35.1847	35.822
GAS1-N40GS	FFYSNN[4.1112]GSQFYIR	1112	2	3.80164	138.055	2	b	1		23.5684	52.7083	76.5278		36.8977	35.8688	71.334	101.91		65.6866	36.1092	107.726	55.0334	80.8979	68.752			37.5328	37.533	22.0094	75.0661					36.2789
GAS1-N40GS	FFYSNN[4.1112]GSQFYIR	1112	2	3.80164	145.049	3	b	1	37.5334					109.363	37.5382	10.1745	29.6744		10.7319	37.5327			30.6696	37.5943			75.0657	41.0194	19.2736	73.0436	69.0094			37.5333	37.5098		31.3622
GAS1-N40GS	FFYSNN[4.1112]GSQFYIR	1112	2	3.80164	163.06	4	b	1	58.8782	5.82517		74.8152		90.9518	37.5063	25.4541	37.5279		63.0254			48.6587				55.1982		76.5207	5.82517	34.6988	36.7686			37.5298		13.5976
GAS1-N40GS	FFYSNN[4.1112]GSQFYIR	1112	2	3.80164	168.065	5	b	1			37.5091				34.6841				36.87	37.5329			29.6747								37.5347	9.1154					37.533
GAS1-N40GS	FFYSNN[4.1112]GSQFYIR	1112	2	3.80164	186.076	6	b	1			16.5535		31.053	23.4499	37.5332			37.3709			105.913		37.5298		37.5325							37.5343
GAS1-N40GS	FFYSNN[4.1112]GSQFYIR	1112	2	3.80164	204.087	7	b	1				74.9004	66.9138		25.1254	20.4537		36.3502		39.7608	37.5337	23.9536				15.0299				25.3874						14.0753	143.499	36.5203
GAS1-N40GS	FFYSNN[4.1112]GSQFYIR	1112	2	3.80164	366.139	8	b	1										37.371																			33.4404	55.242
GAS1-N40GS	FFYSNN[2.1112]GSQFYIR	1112	2	2.7724	127.039	1	b	1	31.053	39.2561	33.604	30.9506	16.5695	37.4816		36.7665				36.8716	35.9937	83.9396	28.7609	37.3281	22.1478	14.6554		75.0394				35.5655			48.4532	71.2844	42.5127	90.441
GAS1-N40GS	FFYSNN[2.1112]GSQFYIR	1112	2	2.7724	138.055	2	b	1			36.7677	76.7183	36.694	61.4453	25.3245	37.5346		37.5339	35.9323	27.9332	107.188	32.4481					73.5677	31.3764	17.9365	16.0331	22.4504				74.762
GAS1-N40GS	FFYSNN[2.1112]GSQFYIR	1112	2	2.7724	145.049	3	b	1		21.3282		37.2657		65.0809	100.416	30.4229		37.3708			67.4267	125.909					37.5321			37.5335	92.6961	37.5313		36.0937		37.3617	75.0417	37.4507
GAS1-N40GS	FFYSNN[2.1112]GSQFYIR	1112	2	2.7724	163.06	4	b	1	23.5686						29.6735		112.406		29.7839		34.3858	58.9711	48.1934	75.0639		32.9308	30.4993		37.5308	36.4203				36.8724		37.5052
GAS1-N40GS	FFYSNN[2.1112]GSQFYIR	1112	2	2.7724	168.065	5	b	1	31.053	37.5301		35.1833		96.7174			34.6835					31.0528	37.5324			36.7748				33.477		37.5333				18.1203	37.533
GAS1-N40GS	FFYSNN[2.1112]GSQFYIR	1112	2	2.7724	186.076	6	b	1						32.7158				37.251							37.509				75.0184
GAS1-N40GS	FFYSNN[2.1112]GSQFYIR	1112	2	2.7724	204.087	7	b	1			37.5333	109.513	16.0708	52.1262		65.0867				35.1841	75.0516	50.0158	37.5289	71.8784	37.5307							75.0556		37.3874				37.335
GAS1-N40GS	FFYSNN[2.1112]GSQFYIR	1112	2	2.7724	366.139	8	b	1						37.5325	37.5334				37.5346																29.3196
GAS1-N40GS	FFYSNN[24.1112]GSQFYIR	1112	2	23.8866	127.039	1	b	1	39.3062	23.5664	176.05			33.0395	47.0446		37.3889	19.6017			62.2607	23.1124		52.8417		68.9884			6.88488	66.978			25.5993		14.0164	59.7126
GAS1-N40GS	FFYSNN[24.1112]GSQFYIR	1112	2	23.8866	138.055	2	b	1	193.827	17.2966	6.25288			50.5799		53.9887	112.129	23.7932	49.5908	33.9542	25.9889	19.4031	100.58	98.1965	24.0604	194.841	63.8418	79.6044	11.6512	93.8472	120.342	58.4527			6.33724			733.663
GAS1-N40GS	FFYSNN[24.1112]GSQFYIR	1112	2	23.8866	145.049	3	b	1	76.3603	35.655		43.5341	45.8444			90.1057								29.6746		23.5591			56.6948	132.301		112.535	37.372	35.8409	231.811	14.0769	40.5937	79.5562
GAS1-N40GS	FFYSNN[24.1112]GSQFYIR	1112	2	23.8866	163.06	4	b	1	46.5555			103.36		26.376	59.8225	160.012		31.2843			103.804		18.9632		85.5363		12.705	37.4896						164.719			10.7319	163.603
GAS1-N40GS	FFYSNN[24.1112]GSQFYIR	1112	2	23.8866	168.065	5	b	1		15.6648			82.3943			28.8213			31.0521	148.642	37.3616	37.5065	24.3827		121.031				35.1828	14.6047	64.6652	17.78			35.554	14.069	72.2437	321.01
GAS1-N40GS	FFYSNN[24.1112]GSQFYIR	1112	2	23.8866	186.076	6	b	1		25.243	6.40381	26.2177	33.9834		79.5315		57.1889	90.1735		93.2627			105.582				37.5325					12.2261		45.0683	75.0683	13.8457		449.811
GAS1-N40GS	FFYSNN[24.1112]GSQFYIR	1112	2	23.8866	204.087	7	b	1	22.2918		141.605			73.5636	33.3231		85.851		49.7941		255.491	195.424	13.4096		46.0606	56.4212		66.4424		92.2652	118.644		67.7398	223.754		18.3723	63.4001	129.555
GAS1-N40GS	FFYSNN[24.1112]GSQFYIR	1112	2	23.8866	366.139	8	b	1	209.547	132.623	75.6629	19.461	304.566	54.9123	48.934	18.4485		83.9307			66.3749	36.6641			37.5385	31.3834			47.6949	158.443		10.7286		34.5703			53.4593	665.373
GAS1-N40GS	FFYSNN[28.1112]GSQFYIR	1112	2		127.039	1	b	1															39.2548					37.5091
GAS1-N40GS	FFYSNN[28.1112]GSQFYIR	1112	2		138.055	2	b	1		36.3495	37.5303			59.7694									37.5337					37.3891		31.0537					23.5766		37.5339
GAS1-N40GS	FFYSNN[28.1112]GSQFYIR	1112	2		145.049	3	b	1					36.7216	14.0758										37.5316		29.0924									35.1968			74.2969
GAS1-N40GS	FFYSNN[28.1112]GSQFYIR	1112	2		163.06	4	b	1									36.3824							37.5338
GAS1-N40GS	FFYSNN[28.1112]GSQFYIR	1112	2		168.065	5	b	1			37.5303																										37.5339	67.912
GAS1-N40GS	FFYSNN[28.1112]GSQFYIR	1112	2		186.076	6	b	1									75.0665
GAS1-N40GS	FFYSNN[28.1112]GSQFYIR	1112	2		204.087	7	b	1													37.5343																	36.8585
GAS1-N40GS	FFYSNN[28.1112]GSQFYIR	1112	2		366.139	8	b	1		8.06719			38.8886								37.534					37.5341				23.569								37.3875
GAS1-N40GS	FFYSNN[3.1112]GSQFYIR	1112	2	2.77799	127.039	1	b	1	37.5273	19.0681		34.8322	37.3756	71.7626				36.7688					15.805		75.0688	12.309		6.85646	29.0759		38.5139	35.0566			28.0877		64.9841	92.1094
GAS1-N40GS	FFYSNN[3.1112]GSQFYIR	1112	2	2.77799	138.055	2	b	1			74.0214	53.7925		17.3743	11.8053		12.9528		35.1832			55.2701							17.6194	66.9122	33.4639			37.533	37.5338
GAS1-N40GS	FFYSNN[3.1112]GSQFYIR	1112	2	2.77799	145.049	3	b	1		33.973		37.533	37.5581		13.0647	20.4537	36.7952	75.0174		33.1774		43.5495					12.997			41.1611								26.9246
GAS1-N40GS	FFYSNN[3.1112]GSQFYIR	1112	2	2.77799	163.06	4	b	1	37.5286		14.8799		106.379		20.9968			37.5335	30.2699		68.6272		234.313		37.5344	23.2964	23.569			29.9419				37.5086	37.5338	38.2035
GAS1-N40GS	FFYSNN[3.1112]GSQFYIR	1112	2	2.77799	168.065	5	b	1	37.5338	37.5301		36.862		36.8916		37.3885	37.534				37.533					34.0741		26.9294				37.5333				37.3524
GAS1-N40GS	FFYSNN[3.1112]GSQFYIR	1112	2	2.77799	186.076	6	b	1						37.5062				36.3192				31.0535	73.742								37.534					42.1152
GAS1-N40GS	FFYSNN[3.1112]GSQFYIR	1112	2	2.77799	204.087	7	b	1			35.1838	112.595		29.5932				37.5335		63.922			65.6802				29.4676	20.4541		25.8256				24.9571			37.5328	37.4882
GAS1-N40GS	FFYSNN[3.1112]GSQFYIR	1112	2	2.77799	366.139	8	b	1							5.82456	59.9001	37.534		37.39		37.2126		35.1834
GAS1-N40GS	FFYSNN[17.1112]GSQFYIR	1112	2	17.8034	127.039	1	b	1	115.641		480.591	97.6407			74.705			97.4356		65.6358				37.7551				95.471			50.9258		52.9867	96.6247	37.2755	93.3614	34.7	991.47
GAS1-N40GS	FFYSNN[17.1112]GSQFYIR	1112	2	17.8034	138.055	2	b	1	74.1809		912.866				63.7692		577.356			984.712			879.183	266.023		202.547			51.3862		699.707		217.044	40.5412	309.629
GAS1-N40GS	FFYSNN[17.1112]GSQFYIR	1112	2	17.8034	145.049	3	b	1			1995.27	56.4001			155.059		14.6262		177.959	490.567							45.5402		19.8657		493.055		246.737		496.045	39.7673	58.8074	2331.78
GAS1-N40GS	FFYSNN[17.1112]GSQFYIR	1112	2	17.8034	163.06	4	b	1			3446.97	98.7308								771.082						174.032	161.193				380.641		40.7068			23.3058	10.3096	1226.39
GAS1-N40GS	FFYSNN[17.1112]GSQFYIR	1112	2	17.8034	168.065	5	b	1	46.4958									177.481		211.713			371.809	619.544		289.709	43.581	189.019	195.594	545.613	569.217		126.947				116.851
GAS1-N40GS	FFYSNN[17.1112]GSQFYIR	1112	2	17.8034	186.076	6	b	1				24.4029		110.703	27.2944		77.0734		34.4849	100.55			162.494	163.492		172.963		36.6064	182.585		101.59			119.647	69.89	123.15
GAS1-N40GS	FFYSNN[17.1112]GSQFYIR	1112	2	17.8034	204.087	7	b	1				227.06			47.8772		245.254		110.589	551.809			261.728	323.229		170.465					138.292		381.99		655.374		90.2676
GAS1-N40GS	FFYSNN[17.1112]GSQFYIR	1112	2	17.8034	366.139	8	b	1	70.2917		578.771	136.775		60.509			242.331	106.654					487.685	390.786				132.325		50.2369	243.206		272.341				301.319
GAS1-N40GS	FFYSNN[23.1112]GSQFYIR	1112	2	23.3933	127.039	1	b	1	20.4542		28.9394	126.072		65.274	74.1088	37.5074	36.3499	30.6986		35.8398		18.3938			39.4632		21.0735		57.8876		36.3497	36.3466					29.0766	528.448
GAS1-N40GS	FFYSNN[23.1112]GSQFYIR	1112	2	23.3933	138.055	2	b	1		16.4487		75.2516			177.981	51.5394	112.228		99.9777	14.511		119.911	126.809	31.0536	49.7343	81.336				37.0942	21.2503		17.9895	17.6441	135.098		9.06042	495.408
GAS1-N40GS	FFYSNN[23.1112]GSQFYIR	1112	2	23.3933	145.049	3	b	1	18.1521	13.885		63.5004	99.0835	26.1939		110.378		11.2657				101.132						37.1509				28.296			32.4061	75.7235	14.0685
GAS1-N40GS	FFYSNN[23.1112]GSQFYIR	1112	2	23.3933	163.06	4	b	1		19.0663	111.661	60.1594			75.0421				72.0261		13.4194		36.2118	73.0948	94.5172	113.91	73.6621	69.35	177.448	35.0099	36.7474	20.167	19.4924	25.994	151.65	29.6678		54.0135
GAS1-N40GS	FFYSNN[23.1112]GSQFYIR	1112	2	23.3933	168.065	5	b	1	64.4314		219.386	19.9474			35.6409	88.3489		30.8714	37.6194		29.944	49.2335	26.8541	41.4926	19.3827		145.843	34.6583				30.289		73.6284	65.3582	36.7542		591.354
GAS1-N40GS	FFYSNN[23.1112]GSQFYIR	1112	2	23.3933	186.076	6	b	1	233.383	86.3498		144.701		74.2912	101.956	23.3695	110.07	30.131	193.938	113.834		73.3816	108.793	51.2595	98.1654				41.3499		61.1728	64.8338	45.9265			48.2243	35.4117	623.525
GAS1-N40GS	FFYSNN[23.1112]GSQFYIR	1112	2	23.3933	204.087	7	b	1	64.7375		27.2452	64.08	130.068			175.529	118.61		80.5789	136.193			26.326	98.0617	119.955		27.6442	25.2616	66.0879	100.593						180.442	24.7889	344.611
GAS1-N40GS	FFYSNN[23.1112]GSQFYIR	1112	2	23.3933	366.139	8	b	1	14.1961	141.33	111.124		22.1564	32.4106				138.029	97.0248		37.3491	244.113		74.1591		73.7942	83.5794		81.5157	60.0127		65.9494	40.1938	65.9393		37.5325		1052.21
GAS1-N40GS	FFYSNN[29.1112]GSQFYIR	1112	2		127.039	1	b	1															23.5675					37.4902
GAS1-N40GS	FFYSNN[29.1112]GSQFYIR	1112	2		138.055	2	b	1			37.3889												5.82509					37.3891		31.0537
GAS1-N40GS	FFYSNN[29.1112]GSQFYIR	1112	2		145.049	3	b	1					32.9088													35.1843												74.2969
GAS1-N40GS	FFYSNN[29.1112]GSQFYIR	1112	2		163.06	4	b	1																		37.3891
GAS1-N40GS	FFYSNN[29.1112]GSQFYIR	1112	2		168.065	5	b	1			37.3889																											70.6045
GAS1-N40GS	FFYSNN[29.1112]GSQFYIR	1112	2		186.076	6	b	1																		73.6146
GAS1-N40GS	FFYSNN[29.1112]GSQFYIR	1112	2		204.087	7	b	1																														25.1078
GAS1-N40GS	FFYSNN[29.1112]GSQFYIR	1112	2		366.139	8	b	1					38.8886																	23.569								30.2334
GAS1-N40GS	FFYSNN[7.1112]GSQFYIR	1112	2	7.31212	127.039	1	b	1	3136.99		9162.48	35.0793	2685.69	4574.74	321.35	80.4328	699.492	1461.78	382.262		2315.99	2766.09	549.747	2572.17	774.348	1505.3		1951.7	1249.58		2983.67	729.369	34.5817	1035.11	2859.55	1947.38	1480.23
GAS1-N40GS	FFYSNN[7.1112]GSQFYIR	1112	2	7.31212	138.055	2	b	1		626.847		379.742			845.795	324.73	541.62		687.305		250.175		153.636				668.764	172.168		690.285		41.2195		174.162	715.955		675.317
GAS1-N40GS	FFYSNN[7.1112]GSQFYIR	1112	2	7.31212	145.049	3	b	1	2141.3	859.885	13109	282.573	3958.11	4459.56	623.038	622.97	1348.85	1820.2	847.039		5045.45	2283.71	590.918	2048.5	1441.57	1510.16	717.558	1352.82	1789.1		3059.84	1578.52		1294.95	2167.95	959.519	3051.87
GAS1-N40GS	FFYSNN[7.1112]GSQFYIR	1112	2	7.31212	163.06	4	b	1		3001.13	13104	1164.79	2035.31	1641.58	2789.59	1653.63	1690.02	725.048	983.484		2429.34	1456.03	286.447	1877.85	297.765		783.358		1066.48		1993.43	1139.46		1478.25	2370.42		917.866	2363.39
GAS1-N40GS	FFYSNN[7.1112]GSQFYIR	1112	2	7.31212	168.065	5	b	1		91.4251		94.6308			330.254	525.292	450.073		395.401		319.292		82.8007	221.286			356.253	121.14			249.095			217.096	724.002		191.648
GAS1-N40GS	FFYSNN[7.1112]GSQFYIR	1112	2	7.31212	186.076	6	b	1		460.797			188.265		552.067	212.752	443.395					178.668	115.39	225.575	66.3413	265.85		532.643			248.791	543.005		239.688	729.444		377.399	159.35
GAS1-N40GS	FFYSNN[7.1112]GSQFYIR	1112	2	7.31212	204.087	7	b	1		1395.22		802.484			1884.49	1679.8	1415.61		1847.52		598.666	168.145	192.156	867.041		740.747					567.072	435.005	36.6673	120.196	1869.7		927.543
GAS1-N40GS	FFYSNN[7.1112]GSQFYIR	1112	2	7.31212	366.139	8	b	1		723.569		610.331			741.762	609.456	746.036		393.298		284.771		150.663	371.154			642.206			120.722	111.946			300.022	720.074		370.28	510.446
GAS1-N40GS	FFYSNN[18.1112]GSQFYIR	1112	2	17.8839	127.039	1	b	1	157.201	168.38	179.692	79.2483	57.7301			162.81	17.0043	114.455	76.4068	105.522	36.0836	38.7474	13.0302	74.97	167.75	30.2634		21.1125	114.095	41.4861	20.9947	22.5804		164.988		76.4524	25.0896
GAS1-N40GS	FFYSNN[18.1112]GSQFYIR	1112	2	17.8839	138.055	2	b	1	178.578	88.369					139.935	71.7616	371.569	58.6935	20.3683	231.974	227.033	125.215	39.9728	304.772	415.654	98.4295	150.838	70.212	218.488		165.529	36.0859	18.7482
GAS1-N40GS	FFYSNN[18.1112]GSQFYIR	1112	2	17.8839	145.049	3	b	1	47.9857	60.4518	379.715	38.73		72.9522	69.0528	118.423	39.6925		16.2828			75.3457	38.7589	32.2286	503.519	33.3498	115.424	142.178		136.964	51.1887	163.022	35.7682	30.9117		61.1602
GAS1-N40GS	FFYSNN[18.1112]GSQFYIR	1112	2	17.8839	163.06	4	b	1	32.6247	260	192.069	460.536				9.67876							52.4412		9.68494		118.732		102.767	157.48	17.1022	24.2477			90.4379	145.554
GAS1-N40GS	FFYSNN[18.1112]GSQFYIR	1112	2	17.8839	168.065	5	b	1	62.8147	88.3066	467.519	50.0549	360.045	56.3079		95.3512	25.0348	139.754	147.302			96.8931	25.8497			22.9335		115.923		34.2604	185.212	13.9783		129.653	94.6395	104.237	90.5826
GAS1-N40GS	FFYSNN[18.1112]GSQFYIR	1112	2	17.8839	186.076	6	b	1	235.076	41.9262	102.849	91.0771		134.258		387.904	102.053		65.9655		175.173		74.1013	73.9534	128.136	26.8166		68.817		34.6018		87.0753		86.1813	36.1432	62.3826
GAS1-N40GS	FFYSNN[18.1112]GSQFYIR	1112	2	17.8839	204.087	7	b	1	207.764	193.158	481.026	316.801	379.752	281.392	30.3984	322.405	65.1006		287.754			483.625			286.468		129.38	107.342	258.414			75.4232	28.5865	50.1697		63.8244	22.6311
GAS1-N40GS	FFYSNN[18.1112]GSQFYIR	1112	2	17.8839	366.139	8	b	1	158.809	434.671	248.001	187.704		143.207		83.7051		142.835	113.476	51.8626	94.1818			74.5246	96.6331	272.025	174.681	97.1568	425.443	49.6092		298.708	39.5412	186.593			372.943
GAS1-N40GS	FFYSNN[13.1112]GSQFYIR	1112	2	12.2242	127.039	1	b	1	5258.57	555.974	7898.3	14514.7	37747.8	40145.7	8129.28	8668.36	5880.93	11745.7	9483.99	13560.3	22121.5	23005.3	7758.71	9813.36	25365.4	15528.6	8100.39	9140.92	8484.88	2227.69	1919.07		1803.89	9990.41	10969.5	21230.4	28748.8	25079.6
GAS1-N40GS	FFYSNN[13.1112]GSQFYIR	1112	2	12.2242	138.055	2	b	1	11172.3	592.637	15396.3	31194.6	82269.2	82951.8	15470.7	18247.9	11967.5	20472.5	19503	29108.2	48864.4	51762.5	19291.5	22304.8	49815.8	29589.4	17037.6	17791.8	20019.9	1648.08	1908.04		4585.87	17538.6	20910.5	48581.1	65769.2	50931.3
GAS1-N40GS	FFYSNN[13.1112]GSQFYIR	1112	2	12.2242	145.049	3	b	1	10518.7	771.165	14694.3	25975.8	66431.5	72393.8	12773.7	16095.5	10250.7	19412.1	18232.7	26337.6	42895.8	45905.2	16586.9	17357.2	43594.9	25992.9	16873.1	14767.9	15553.4	1966.74	3638.39		3523.11	14030.3	21465.5	44647.4	59505.6	45920.1
GAS1-N40GS	FFYSNN[13.1112]GSQFYIR	1112	2	12.2242	163.06	4	b	1	16067.5	1381.42	18578.3	38640.6	106622	105854	20282.1	23900.1	16811.6	27884.6	25709.8	37558.7	65970.3	67970.7	24628.6	27459.7	66249.2	35953.9	22106.6	21618.2	23152	1661.84	2418.72		5798.35	26940.7	33021.9	70304.8	91743.5	75955.6
GAS1-N40GS	FFYSNN[13.1112]GSQFYIR	1112	2	12.2242	168.065	5	b	1	8899.03	297.84	11395.8	23293.6	54798.5	56785.8	10719.5	12854.2	7894.11	14741.5	12700.5	20021.4	35836	37878.6	13821	14839.1	34611	21160	13084.2	10228.3	11745.5	828.675	1136.6		2533.22	11618	13259.4	33213.1	41969.5	31753.6
GAS1-N40GS	FFYSNN[13.1112]GSQFYIR	1112	2	12.2242	186.076	6	b	1	4817.93	414.783	6169.59	11121.6	28510.2	28322	5706.34	6015.56	3752.8	7217.04	7933.49	9817.11	19029.5	18371.4	6449.85	7387.68	18491.6	9591.67	5999.08	5562.37	5895.21	305.837	186.157		2141.76	5455.06	6402.47	17169	21233.5	16220.4
GAS1-N40GS	FFYSNN[13.1112]GSQFYIR	1112	2	12.2242	204.087	7	b	1	24436.5	1260.06	29784.3	66281.8	158397	160867	29829.1	34810.6	21430.1	39754.3	38384.2	56001.1	107978	103074	39112.5	39780.9	103617	58108	31204.3	30310	34109.7	1842.34	2514.14		7194.36	30217.3	32718.6	95220	121372	90813
GAS1-N40GS	FFYSNN[13.1112]GSQFYIR	1112	2	12.2242	366.139	8	b	1	10172.9	731.032	12195	23857	53097.7	56111.1	11669.6	12362.4	7581.1	13766.6	12883.5	20350.5	43665.6	37471.1	15581.7	15077.8	37595.7	21906.2	11678.4	12119	12690.9	676.613	1004.84		2683.78	10937.2	11173.3	31102.3	39075.6	29641.7
GAS1-N40GS	FFYSNN[5.1087]GSQFYIR	1087	2	5.07706	127.039	1	b	1		11.1599	33.226	122.134	37.533	25.4086	40.9913	36.8715	38.4507		78.5422	36.8714	74.8974	15.3801				50.3425		29.2094	59.3572	186.65	37.5096	105.295				61.223		37.4464
GAS1-N40GS	FFYSNN[5.1087]GSQFYIR	1087	2	5.07706	138.055	2	b	1			37.5333	112.144	35.2912	37.5315			36.7186				61.001	83.9634		37.5352				65.224						9.16829	37.5334		30.793	34.7454
GAS1-N40GS	FFYSNN[5.1087]GSQFYIR	1087	2	5.07706	145.049	3	b	1	22.3536	63.6671	48.9083		87.8492	71.6938	21.5727	90.0949		135.84			38.1761	48.1262	267.117		37.5327	36.871	85.961	74.2952	101.845	24.7016	146.129	186.31	37.533	36.8717		187.277		34.745
GAS1-N40GS	FFYSNN[5.1087]GSQFYIR	1087	2	5.07706	163.06	4	b	1				15.7953	35.8546		56.4282	110.922		74.9037		37.5088	11.1284		13.9992	55.0715	149.05	111.782	104.243		73.4347	40.2854	149.942	20.4537		30.2632	111.268	92.9583	45.7481
GAS1-N40GS	FFYSNN[5.1087]GSQFYIR	1087	2	5.07706	168.065	5	b	1		35.2476	37.5333		37.5062	37.4862		83.0897	75.0669	38.2019				37.5332	35.1834			36.7988						74.8654
GAS1-N40GS	FFYSNN[5.1087]GSQFYIR	1087	2	5.07706	186.076	6	b	1			75.0164	75.0657		70.2135			49.3477			37.5088			37.3885	8.8379					33.0387				37.533				37.5333
GAS1-N40GS	FFYSNN[5.1087]GSQFYIR	1087	2	5.07706	204.087	7	b	1	225.205		37.3708	36.3448	32.9874	37.5072		23.5679	37.5333		24.8381	113.001			75.1359	75.0657	41.0148	40.944			111.364						76.6427	25.1163
GAS1-N40GS	FFYSNN[5.1087]GSQFYIR	1087	2	5.07706	366.139	8	b	1	37.5333	37.5311									37.5328							37.5346								37.3893
GAS1-N40GS	FFYSNN[23.1087]GSQFYIR	1087	2	23.5561	127.039	1	b	1	36.666							24.5067		61.2528		54.6655			7.72553		37.6488				37.4871	105.132	108.21			37.5302	75.0655	29.4804		396.149
GAS1-N40GS	FFYSNN[23.1087]GSQFYIR	1087	2	23.5561	138.055	2	b	1	82.4845	98.5875		54.7396	26.5578	103.286		89.504	33.3888	97.7647	53.9657	114.836	124.885	13.4187		34.9925	42.936	34.4452	226.191	4.46082		69.3907		224.774	23.5687	14.0361	66.3264	63.8897	34.4057	142.62
GAS1-N40GS	FFYSNN[23.1087]GSQFYIR	1087	2	23.5561	145.049	3	b	1	59.8378	22.7054	123.767	50.6319	112.761	104.343	14.0771	37.4094	20.3998			24.2319				37.5098		146.202	86.6596	22.0732	32.1291	61.268		33.6938		37.5093		36.2219
GAS1-N40GS	FFYSNN[23.1087]GSQFYIR	1087	2	23.5561	163.06	4	b	1		78.2377	119.544	109.375	19.7274	18.4399	36.1371	22.7714	67.2375			26.7764	25.8025	179.049	49.8173		20.7603	100.488			107.701		77.0707				24.7745		23.5682
GAS1-N40GS	FFYSNN[23.1087]GSQFYIR	1087	2	23.5561	168.065	5	b	1	108.422	143.078		32.4149		16.0789	35.9776		68.2155	46.8709	151.604	37.6148		37.4834			75.0674	82.5822	18.5039		83.4112		43.3936		29.9756	16.5054	48.1336	37.3893
GAS1-N40GS	FFYSNN[23.1087]GSQFYIR	1087	2	23.5561	186.076	6	b	1	306.938	40.3719	91.3486	113.665	80.3469		27.0243	118.717				123.207		14.8637	88.329		37.5299	33.9144	38.2504	29.1419	64.0289		69.5043	57.0259	157.715	35.2548		66.5501	21.0459	305.287
GAS1-N40GS	FFYSNN[23.1087]GSQFYIR	1087	2	23.5561	204.087	7	b	1	24.5582	173.029	68.1108	259.887	43.5958	32.1059		28.6427	98.7655	132.784	44.1217	201.144	25.737		91.1179		91.8049			64.9249	54.7676	32.0977	35.5126	23.3809	65.8617	183.081		51.7108	103.646
GAS1-N40GS	FFYSNN[23.1087]GSQFYIR	1087	2	23.5561	366.139	8	b	1	49.883	107.774	112.763	463.116	43.9154		132.169			122.77	34.0185	110.046	115.694	5.16212	76.4625	37.3714		94.5616				33.4747		37.2503	19.2638	19.0693	208.06			116.823
GAS1-N40GS	FFYSNN[27.1087]GSQFYIR	1087	2	27.1428	127.039	1	b	1					75.0673																					36.8714				52.5055
GAS1-N40GS	FFYSNN[27.1087]GSQFYIR	1087	2	27.1428	138.055	2	b	1			53.7596							23.5687			37.5337		37.5343		26.9244		6.87106											43.077
GAS1-N40GS	FFYSNN[27.1087]GSQFYIR	1087	2	27.1428	145.049	3	b	1			26.9257		37.533	37.1999				14.9817		28.979																		264.342
GAS1-N40GS	FFYSNN[27.1087]GSQFYIR	1087	2	27.1428	163.06	4	b	1	37.5409			37.5343	41.0205	75.0489						75.6773	75.0668		37.5347							75.0754						37.3626		128.674
GAS1-N40GS	FFYSNN[27.1087]GSQFYIR	1087	2	27.1428	168.065	5	b	1					37.3712			37.5344												20.7861						35.184
GAS1-N40GS	FFYSNN[27.1087]GSQFYIR	1087	2	27.1428	186.076	6	b	1	37.3972		37.5305						37.5227	31.0527																	26.239			96.2853
GAS1-N40GS	FFYSNN[27.1087]GSQFYIR	1087	2	27.1428	204.087	7	b	1	27.389			37.4889																37.5338	37.5333						23.5686	35.1843		120.585
GAS1-N40GS	FFYSNN[27.1087]GSQFYIR	1087	2	27.1428	366.139	8	b	1	57.439							13.268	57.428			28.2712					71.9767		26.5027	37.5337	37.3677	37.5411								18.7408
GAS1-N40GS	FFYSNN[13.1087]GSQFYIR	1087	2	13.4391	127.039	1	b	1	1587.64		1247.04		673.259		2419.53	1510.69	776.533			495.319	3523.22	6304.38	210.095	987.163		3107.67	888.717	698.643	243.718	4839.37	7983.27	4105.53			8639.1	1522.06	974.758	10662.8
GAS1-N40GS	FFYSNN[13.1087]GSQFYIR	1087	2	13.4391	138.055	2	b	1	2378.85	496.85	5756.05		726.648		2920.54	3497	2899.73	511.73	944.198	2514.01			1409.04	2358.54			2247.91	1427.73	970.128	2253.24	7461.06	6388.64				2461.32	1718.4
GAS1-N40GS	FFYSNN[13.1087]GSQFYIR	1087	2	13.4391	145.049	3	b	1	3344.96		3232.26		762.492		3079.5	4018.89	2189.79			2605.64	4304.44	6262.86	649.431	789.152		5503.93	2020.79	165.007		6693.13	11672.8	6949.13			10353.1	2114.66	2234.68	10728.9
GAS1-N40GS	FFYSNN[13.1087]GSQFYIR	1087	2	13.4391	163.06	4	b	1	4145.8		6449.28		293.729		6301.77	5272.39	2764.94			4724.37	2109.26	4185.86	1351.17	1606.75		3512.02	2317.56	2106.95	2497.34	4093.82	12480.2	10456.3			6529.81	4303.72	3798.9	6812.03
GAS1-N40GS	FFYSNN[13.1087]GSQFYIR	1087	2	13.4391	168.065	5	b	1	2442.39	308.652	2856.71		699.986		2465.14	1326.31		97.4462	342.783	1995.93			1273.12	530.844	588.086		849.538	1315.59	765.295	1246.34	4122.77	3797.07				2645.11	1207.29
GAS1-N40GS	FFYSNN[13.1087]GSQFYIR	1087	2	13.4391	186.076	6	b	1	564.573	447.417	904.273		610.427		873.374	1303.25	347.242		300.971	767.617			536.121	247.031	315.331	355.809	148.409	383.135	474.658	514.946	1959.52	1645.63					747.858
GAS1-N40GS	FFYSNN[13.1087]GSQFYIR	1087	2	13.4391	204.087	7	b	1	4879.9	1459.6	8380.78		3226.92		6203.32	4012.86	2286.82	530.024	892.76	4089.6			845.17	2419.8	2129.27		3815.82	2816.63	3242.68	2028.91	9161.32	8822.08				4169.7	3877.69	2806.33
GAS1-N40GS	FFYSNN[13.1087]GSQFYIR	1087	2	13.4391	366.139	8	b	1	3995.38	2135.73	4145.04		2259.35		1660.71	2162.81	1524.09	1043.14	1664.07	1656.01			371.296	723.985	2938.71	1284.13	1504.85	685.404	603.151	759.212	3693.78	2485.95				2294.91	1465.69	1286.47
GAS1-N40GS	FFYSNN[8.1087]GSQFYIR	1087	2	7.83965	127.039	1	b	1	1633.63	950.216	120.961	2146.08	893.436		1371.91	1190.12	870.559	924.319	1104.83	1907.16	424.458	88.518		689.788	427.25		892.381	820.449	275.477	228.981	59.5008	502.499	357.013	50.8734			176.867	326.913
GAS1-N40GS	FFYSNN[8.1087]GSQFYIR	1087	2	7.83965	138.055	2	b	1	77.3936	402.692	577.521	126.436	127.507	39.2446	354.325		125.431	679.591			62.4136		276.201	144.354	33.7221		102.135	90.6049	66.3862	1111.37	687.391	600.274	99.1062		165.42	125.908	368.801	224.274
GAS1-N40GS	FFYSNN[8.1087]GSQFYIR	1087	2	7.83965	145.049	3	b	1	1139.72	782.491	212.713	990.736	1674.47		1512.44	721.969	937.574	1711	874.79	1364.97	960.589		53.5413	467.138	590.215	207.9	1065.18		288.186		134.47		191.835	78.0471	200.364	1005.1	754.206
GAS1-N40GS	FFYSNN[8.1087]GSQFYIR	1087	2	7.83965	163.06	4	b	1	1024.51	1422.08	309.497	880.372	1674.92		931.657	1226.4	512.949	1896.9	808.281	1272.16	1423.45	179.876	103.708	855.956	537.781	171.071	1270.18	664.567	664.272	234.448	244.314	991.022	54.8051		1614.72	930.691	438.345	321.961
GAS1-N40GS	FFYSNN[8.1087]GSQFYIR	1087	2	7.83965	168.065	5	b	1		228.223	558.068		277.598	76.5829	227.269	157.14	109.663	318.885	112.871	364.886	70.9065	37.1214		187.358	126.033	364.754	304.386		139.29	314.486	775.921	301.014		134.91	57.2161	116.895		159.723
GAS1-N40GS	FFYSNN[8.1087]GSQFYIR	1087	2	7.83965	186.076	6	b	1		209.742		195.428	219.825		356.508	131.911	44.314	102.817	128.652	271.319	138.916		101.47			145.622	381.236	379.533	162.518	359.767	261.697	253.234		149.725	55.1114		117.156	63.0315
GAS1-N40GS	FFYSNN[8.1087]GSQFYIR	1087	2	7.83965	204.087	7	b	1	964.262	1585.03	614.1	619.674	1439.21		1062.4	765.792	395.862	1142.49	473.396	647.34	174.041	320.698			254.418	374.479	700.365	155.038	1317.23	1015.55	1539.28	436.177		423.265	249.998	479.078		526.085
GAS1-N40GS	FFYSNN[8.1087]GSQFYIR	1087	2	7.83965	366.139	8	b	1	788.617	380.81	395.066	196.111	454.761	82.7599	517.499	273.074		501.143	167.414		369.041	51.0971	129.303	262.347		132.708	582.068	70.263	587.119	720.004	590.367	130.693			321.502	401.217	226.252	238.25
GAS1-N40GS	FFYSNN[22.1087]GSQFYIR	1087	2	22.1528	127.039	1	b	1	77.0547		156.067			78.2827	33.4758		37.5334	61.2514				95.7337							37.3879	112.602		26.6045		37.5949	33.2594	37.5276	75.0679
GAS1-N40GS	FFYSNN[22.1087]GSQFYIR	1087	2	22.1528	138.055	2	b	1	42.9703	101.543	74.716	49.544		12.3018	144.467	57.5533	193.466	159.44	20.4476	73.8306	38.4961			35.6897	110.255	17.965		29.3143			56.3403		102.02	107.134	103.987	53.1628	29.3123
GAS1-N40GS	FFYSNN[22.1087]GSQFYIR	1087	2	22.1528	145.049	3	b	1	42.7043	52.6129	31.7231		184.903		37.5342					118.936	78.717		80.3009	37.3356	29.6319	150.128	35.1828		21.6621			160.893		44.683	91.7736		26.9254
GAS1-N40GS	FFYSNN[22.1087]GSQFYIR	1087	2	22.1528	163.06	4	b	1		33.8711		266.079	23.3563		30.0646	158.87		27.6685	44.3974	20.1812	100.735		48.4826			131.544	21.9691		100.814	37.3698		41.0204					170.187
GAS1-N40GS	FFYSNN[22.1087]GSQFYIR	1087	2	22.1528	168.065	5	b	1	56.0139	25.3073		55.4638	99.1583	13.1558	111.327	36.7457	19.8901	76.7201		25.4148	74.6284	111.055	225.311		111.763	72.1101	64.0659	75.0669			75.0454		20.8646			37.5335	33.1152
GAS1-N40GS	FFYSNN[22.1087]GSQFYIR	1087	2	22.1528	186.076	6	b	1	11.5606	95.2604	96.105	405.62	50.7211		269.039				26.102		45.1401	106.94		13.3409		37.2065	19.2996	18.2895	63.9756		51.6526	29.8139	149.71	154.514	107.764		11.4039
GAS1-N40GS	FFYSNN[22.1087]GSQFYIR	1087	2	22.1528	204.087	7	b	1			141.033	67.4777	77.2676	104.479	106.241	23.085	100.662	24.5671	29.0755	20.3549	48.5222	171.638	98.5452				20.2681	83.5644	89.4041	27.7837		272.767	38.4506	187.669	103.762	38.5527
GAS1-N40GS	FFYSNN[22.1087]GSQFYIR	1087	2	22.1528	366.139	8	b	1	152.562	76.0339	72.8031		86.482	63.9763	34.9316	75.9988	26.0441	111.3		135.503	125.032	68.529	80.0441	36.6363	105.06	103.481	20.4526	89.2521	53.9562		56.0319		55.7665		76.7135		18.766
GAS1-N40GS	FFYSNN[24.1087]GSQFYIR	1087	2	23.5456	127.039	1	b	1	33.3886		53.2683			157.187	74.2237					36.5544	34.4478	37.2649	12.906	29.9751	32.1007								37.532	37.5089		88.0282	22.9814	39.0159
GAS1-N40GS	FFYSNN[24.1087]GSQFYIR	1087	2	23.5456	138.055	2	b	1	72.9785	47.8604	65.1591	46.5508		59.342		37.2691	36.6233	35.2781	61.0354	25.7267	29.8037	34.5656		21.8388		35.0648		33.4776	74.2448		48.8384	36.7672	162.483	26.6109		64.3594	70.1542	92.8235
GAS1-N40GS	FFYSNN[24.1087]GSQFYIR	1087	2	23.5456	145.049	3	b	1	123.384	37.5344		93.811		114.619	11.9607	36.7672	35.8102	66.3762		28.2051	20.0267							37.5123		13.4193		120.919	34.7439	37.5306		37.534	37.2662	717.436
GAS1-N40GS	FFYSNN[24.1087]GSQFYIR	1087	2	23.5456	163.06	4	b	1			41.2909		18.8884	214.838	112.418		66.4796				346.206	90.9976	63.4142		35.2655		26.5022		37.5333						60.6217		33.4769	443.162
GAS1-N40GS	FFYSNN[24.1087]GSQFYIR	1087	2	23.5456	168.065	5	b	1	106.613	138.832	99.4696	37.2765				26.5056	45.7212	35.1238	94.305			16.0345			74.0355	69.7155	58.2714				85.8106	29.6618		23.7898	40.8141	37.5336		29.6461
GAS1-N40GS	FFYSNN[24.1087]GSQFYIR	1087	2	23.5456	186.076	6	b	1	333.176	35.6909	40.0242	23.4863	6.24485	38.9881	51.2012					51.3346	23.8027		102.85	41.8905	37.3616		211.701			38.216	29.3182	18.3309		43.0919		70.9545
GAS1-N40GS	FFYSNN[24.1087]GSQFYIR	1087	2	23.5456	204.087	7	b	1	29.7549	154.027			74.0642	355.707	60.4237	69.1191	108.915	79.0585	16.8619		9.87821		49.4706		80.3331	62.0311	81.4588		34.307	30.22	58.3386	16.3948		186.973		51.5676	34.4297	184.475
GAS1-N40GS	FFYSNN[24.1087]GSQFYIR	1087	2	23.5456	366.139	8	b	1	20.7384	100.141				92.0659	5.89793		37.2505	132.545	28.0407	69.6674			71.6337	36.8715		144.575	34.5415	39.2564				65.3352	33.4411	35.8114	112.596	78.3508	54.9537	670.829
GAS1-N40GS	FFYSNN[3.1087]GSQFYIR	1087	2	2.20501	127.039	1	b	1	31.0532		37.5341	36.8647	37.5327		38.0421			26.8597		32.0882	37.5305	54.7431			37.3894	37.5331		37.5327		31.7992		37.5049					21.0429
GAS1-N40GS	FFYSNN[3.1087]GSQFYIR	1087	2	2.20501	138.055	2	b	1		6.50059	30.8385	36.8716	28.2032	37.3895				30.5826	1.7743		108.09		37.6546			6.75888	37.3004									30.6906		37.3898
GAS1-N40GS	FFYSNN[3.1087]GSQFYIR	1087	2	2.20501	145.049	3	b	1	14.0755	56.1225	62.7249			129.01		37.5334	34.6406								37.5302						37.5316	35.412		37.5336		37.5318	40.7965
GAS1-N40GS	FFYSNN[3.1087]GSQFYIR	1087	2	2.20501	163.06	4	b	1		57.7915			60.9533				76.7832	9.52516	20.518	75.0655	36.2289		36.3496	31.0533	37.5092	16.6502		32.9357	72.2757		35.3408	8.54016
GAS1-N40GS	FFYSNN[3.1087]GSQFYIR	1087	2	2.20501	168.065	5	b	1																23.5688					63.4763			40.3085				35.7863
GAS1-N40GS	FFYSNN[3.1087]GSQFYIR	1087	2	2.20501	186.076	6	b	1	39.0751							37.0611					37.5342								37.5256								37.5336
GAS1-N40GS	FFYSNN[3.1087]GSQFYIR	1087	2	2.20501	204.087	7	b	1							37.5335		74.3641					37.538					33.4754			36.872
GAS1-N40GS	FFYSNN[3.1087]GSQFYIR	1087	2	2.20501	366.139	8	b	1					35.5381	37.3895																				37.5339				37.3898
GAS1-N40GS	FFYSNN[4.1087]GSQFYIR	1087	2	3.80585	127.039	1	b	1	67.487			25.6408	23.5676		14.0765	36.872	37.6596	75.0674			71.8315	19.1677							37.5324			37.5066	74.2976					31.0528
GAS1-N40GS	FFYSNN[4.1087]GSQFYIR	1087	2	3.80585	138.055	2	b	1				37.7392	13.6865	37.5341			113.454	37.4859	41.0194		60.5422	37.4872	5.5309			35.758	27.4091		75.26	59.8335		37.5346	37.5092		14.0762	30.6709	9.70243	31.0526
GAS1-N40GS	FFYSNN[4.1087]GSQFYIR	1087	2	3.80585	145.049	3	b	1		34.9303			14.075	129.01				37.5337			40.3419	29.6739	53.7927			37.488				58.0959	34.5553	72.376				37.3625		23.5683
GAS1-N40GS	FFYSNN[4.1087]GSQFYIR	1087	2	3.80585	163.06	4	b	1	36.7671	37.2481	17.4146	91.1756	14.075					27.9121	19.4056		40.6778		5.82517	33.4773			21.7827	107.048			65.2334				59.6138		12.8023
GAS1-N40GS	FFYSNN[4.1087]GSQFYIR	1087	2	3.80585	168.065	5	b	1	148.868				14.075						37.2681					37.5341			37.5327				37.5339			37.533		29.5416
GAS1-N40GS	FFYSNN[4.1087]GSQFYIR	1087	2	3.80585	186.076	6	b	1			37.663					35.1003															34.7462						23.5683
GAS1-N40GS	FFYSNN[4.1087]GSQFYIR	1087	2	3.80585	204.087	7	b	1			75.0386		23.5131		23.5686												51.8607	36.3498							20.2667
GAS1-N40GS	FFYSNN[4.1087]GSQFYIR	1087	2	3.80585	366.139	8	b	1						37.5341																	37.5341			37.533
GAS1-N40GS	FFYSNN[15.1087]GSQFYIR	1087	2	15.7791	127.039	1	b	1	160.269	1519.49	125.042	1856.93	2984	2932.65	843.25	1696.69	1380.26	296.083	1251.28	2815.96	3308.23	2581.01	1260.66	194.187	2338.29	2083.63	243.019	466.954	519.601						1357.88	1688.43	664.784
GAS1-N40GS	FFYSNN[15.1087]GSQFYIR	1087	2	15.7791	138.055	2	b	1	229.525	3777.86	166.763	2802.92	4532.28	6834.31	2558.66	4243.88	2834.05		2037.06	4078.53	3986.31	3793.02	1828.03	787.73	4393.24	4635.62	313.266	617.937	2636.97				990.563		890.198		1494.21
GAS1-N40GS	FFYSNN[15.1087]GSQFYIR	1087	2	15.7791	145.049	3	b	1	697.421	3042.64	643.524	3478.38	4945	5456.37	2839.5	3944.16	1959.72	206.066	2861.86	4334.01	3082.27	4233.54	2770.68	922.32	3320.74	4290.62	323.816	1134.49	2087.15						3471.54	1314.48	3825.56
GAS1-N40GS	FFYSNN[15.1087]GSQFYIR	1087	2	15.7791	163.06	4	b	1	686.028	4027.41	1120.82	5155.51	6398.13	10404.1	4151.55	4966.62	3994.68	317.228	3279.98	6800.65	5126.61	6273.05	3340.51	2181.32	5909.5	6287.55	782.266	2704.41	2753.14				1551.24		2445.23	1634.25	2175.8
GAS1-N40GS	FFYSNN[15.1087]GSQFYIR	1087	2	15.7791	168.065	5	b	1		1991.47		2388.6	2740.44	4141.69	1642.68	2140.53	2159.35	91.2396	842.064	2723.65	2441.46	2162.7	1318.89	913.898	1380.7	3319.41	214.051	1011.57	594.072				498.774		893.249	1016.15	1168.63
GAS1-N40GS	FFYSNN[15.1087]GSQFYIR	1087	2	15.7791	186.076	6	b	1	121.499	2407.81	124.234	632.758	1393.33	2404.03	895.383	951.678	1388.63	15.5787	418.434	1940.6	754.419	1530.53	839.887	150.8	1649.38	1860.35	140.726	541.917	976.343							183.47	486.912
GAS1-N40GS	FFYSNN[15.1087]GSQFYIR	1087	2	15.7791	204.087	7	b	1	218.977	6255.9	454.361	3923.57	8404.33	11067.3	4385.77	5485.89	4464.69	144.947	3481.74	7375.36	7071.09	8045.99	3539.25	879.589	5809.46	7527.25		2187.13	3600.79						3983.47	2210.86	5897.61
GAS1-N40GS	FFYSNN[15.1087]GSQFYIR	1087	2	15.7791	366.139	8	b	1		2755.77		1807.17	3660.34	4172.96	261.38	2582.11	2082.33	75.4643	879.648	2799.87	2329.39	2681.87	1670.95	1154.68	2222.27	2423.26	189.343	832.336	137.184				643.291		893.903		1397
GAS1-N40GS	FFYSNN[11.1087]GSQFYIR	1087	2	11.2957	127.039	1	b	1	2837.48	1919.19	3519.04	932.705	3695.08	4836.35	3516.76	68.321	3077.15	2757.61	2591.56	6327.56	2231.02	2628.57	780.877	2143.77	1857.18	246.969		2236.72	2463.48	688.449	619.428	992.85	136.371	4756	238.982		16395.6	21424.8
GAS1-N40GS	FFYSNN[11.1087]GSQFYIR	1087	2	11.2957	138.055	2	b	1	3631.01	3753.8	5500.8	2555.09	5266.93	4920.14	3355.89		3917.16	5223.08	3614.35	6071.37	4053.08	4417.28	2276.91	3328.37	4335.97	1765		3505.1	2363.55			159.406	91.8223	6403.18	300.741	329.411	21594.5	27860
GAS1-N40GS	FFYSNN[11.1087]GSQFYIR	1087	2	11.2957	145.049	3	b	1	4115.12	4706.73	7499.17		4245.25	4226.37	3482.48		4928.14	4801.9	3883.96	9779.69	3069.74	1827.63	1258.02	2488.6	3687.77	1026.79		2242.61	4763.61	369.446	1620.18	486.557		8745.77	750.693		26585.3	35632.1
GAS1-N40GS	FFYSNN[11.1087]GSQFYIR	1087	2	11.2957	163.06	4	b	1	5836.66	4122.82	6839.9	2687.63	8384.69	9847.49	4980.38		5317.78	7502.2	5672.94	9998.21	5551.54	5386.39	1149.55	5522.18	6324.83			3615.2	4278.47				66.3645	12909.6		586.983	34632.4	48957.8
GAS1-N40GS	FFYSNN[11.1087]GSQFYIR	1087	2	11.2957	168.065	5	b	1	1856.98	2036.5	3359.25	2364.5	2692.62	2043.42	1710.29		3203.62	2448.46	2027.92	3246.71	2069.36	2150.75	1495.97	1370.28	2461.29			2006.66	1923.44				75.5192	3812.66			12981.8	16922.3
GAS1-N40GS	FFYSNN[11.1087]GSQFYIR	1087	2	11.2957	186.076	6	b	1	1955.15	2267.81	2679.05	633.275	1431.07	1232.55	1195.27		1642.81	1454.02	1126.48	1723	941.123	1094.46	644.983	783.918	1458.05	683.65		1180.74	540.96		249.216			1409.1		794.752	6145.1	9880.2
GAS1-N40GS	FFYSNN[11.1087]GSQFYIR	1087	2	11.2957	204.087	7	b	1	7428.48	7029.27	8404.51	4347.45	10437.2	10605.5	6141.14		6292.23	6563.61	4847.63	9500.36	6667.29	7933.28	3508.25	4353.15	8498.85			4001.88	3574.77				320.412	11211.3		626.539	28462.9	38552.3
GAS1-N40GS	FFYSNN[11.1087]GSQFYIR	1087	2	11.2957	366.139	8	b	1	1880.16	1826.56	2039.23	1180.03	1689.65	2073	1934.47	2235.72	764.347	1952.19	1705.79	3443.52	2236.6	2245.68	1488.69	1136.4	1992.68	870.82		1879.75	665.194	2110.32	4571.26	4406.74		3405.07	2481.02	2030.98	12411.5	16294.1
GAS1-N40GS	FFYSNN[16.1087]GSQFYIR	1087	2	15.8029	127.039	1	b	1	166.655	305.451	1063.34	249.627	796.823	56.7495	263.708		94.5283	266.696	417.939	329.321	63.957	969.392	189.628	528.341	1096.62	450.94	269.83		411.512	722.328	909.825	766.766	486.298	1702.48	139.713		967.539
GAS1-N40GS	FFYSNN[16.1087]GSQFYIR	1087	2	15.8029	138.055	2	b	1	246.473	622.274	952.609	408.57	1420.78	322.478	563.673	746.56	89.4741			244.074	451.724	470.817	1052.73	484.712	1222.56	290.975	311.981	952.918	735.852	1311.67	1664.84	1499.18	240.788	2940.86		382.996	1491.45
GAS1-N40GS	FFYSNN[16.1087]GSQFYIR	1087	2	15.8029	145.049	3	b	1	516.778	922.515	1770.25	246.888	747.444	250.726	411.872	524.545	347.728		111.344	634.111	353.406	1115.78	35.7198	277.433	1794.8	1273.18	699.156	761.166	470.234	1564.29	2206.04	1499.44	327.931	2678.05	162.238		1558.32
GAS1-N40GS	FFYSNN[16.1087]GSQFYIR	1087	2	15.8029	163.06	4	b	1	733.294	425.524	1966.73	662.461	947.476	1278.77	1053.97	272.171		402.168	260.151	717.662	1660.96	1777.34		784.901	2153.69	1602.12	1350.23	1506.46	760.473	2616.6	2529.16	2518.4	532.503	3988.79	168.261		2393.71
GAS1-N40GS	FFYSNN[16.1087]GSQFYIR	1087	2	15.8029	168.065	5	b	1			992.508	186.978	426.161	70.1667	219.666		416.763	204.209		347.712	715.7	782.398		313.579	301.916	710.773	279.699	406.688	58.1729	358.216	1560.7	642.29	472.782	2298.27	201.954	107.443	1201.08
GAS1-N40GS	FFYSNN[16.1087]GSQFYIR	1087	2	15.8029	186.076	6	b	1		52.7917	436.488	178.712	453.672	279.392	261.767	196.902				434.561	129.736		264.102	442.106	164.107	379.352	181.229		371.734	458.13	553.303	305.782	217.826	848.048		79.6734	442.151
GAS1-N40GS	FFYSNN[16.1087]GSQFYIR	1087	2	15.8029	204.087	7	b	1	476.536	394.664	248.76	344.782	1605.39	442.711	496.609				233.901	1527.55	1107.13	2287.2	960.368	450.327	1100.69	1474.01	692.32	307.669	1282.38	1355.01	2792.79	1588.42	427.792	4253.25		116.761	2508.78
GAS1-N40GS	FFYSNN[16.1087]GSQFYIR	1087	2	15.8029	366.139	8	b	1	666.642	650.302	538.87		455.558						89.0444	971.159	183.714	100.133	628.002	133.631	870.545	469.17	165.988	192.704	801.734	432.274	568.337	329.112	73.4415	1253.08	395.303		1006.43
GAS1-N40GS	FFYSNN[2.1087]GSQFYIR	1087	2	2.19242	127.039	1	b	1	37.5339											12.2814	35.1825	96.7089	36.3499		37.534	35.1833	37.3693									38.2045	75.068
GAS1-N40GS	FFYSNN[2.1087]GSQFYIR	1087	2	2.19242	138.055	2	b	1		6.33979			37.534		37.534	37.5346		37.533			106.574			5.73753		6.67663				37.5341	22.6208	34.3944	37.3311					37.5337
GAS1-N40GS	FFYSNN[2.1087]GSQFYIR	1087	2	2.19242	145.049	3	b	1	37.5334	75.3129							37.557	37.5334						31.82	37.2502		37.5335	37.4887			26.9269					39.9734	76.3367	37.5341
GAS1-N40GS	FFYSNN[2.1087]GSQFYIR	1087	2	2.19242	163.06	4	b	1		57.1996		37.5341	5.46543	36.2018			72.0238			8.96449	35.8891	74.9411	75.4946		37.5276	14.0391			102.618			26.9246		37.5341
GAS1-N40GS	FFYSNN[2.1087]GSQFYIR	1087	2	2.19242	168.065	5	b	1				23.7108				37.5349								23.5127					63.4617	37.5342					37.5336			74.8521
GAS1-N40GS	FFYSNN[2.1087]GSQFYIR	1087	2	2.19242	186.076	6	b	1	58.1411			35.9764		37.5327							36.872								37.5306				37.2554		75.0674
GAS1-N40GS	FFYSNN[2.1087]GSQFYIR	1087	2	2.19242	204.087	7	b	1			112.6	71.3423		14.5784	28.9823	37.4895	66.8214						31.6778					37.5309		26.8812				37.5343		37.5336	112.602
GAS1-N40GS	FFYSNN[2.1087]GSQFYIR	1087	2	2.19242	366.139	8	b	1			37.5339		36.3502	37.533									28.683
GAS1-N40GS	FFYSNN[19.1087]GSQFYIR	1087	2	19.1444	127.039	1	b	1	12.6889	31.6524	64.3681		79.894			158.091	25.454			57.9787			35.7629		50.5801	22.1994	31.0534		10.9086		39.4615	34.6579	173.452	28.1003	31.0195	16.5043
GAS1-N40GS	FFYSNN[19.1087]GSQFYIR	1087	2	19.1444	138.055	2	b	1	144.139		72.5675			213.94	172.312	8.98222	38.5796	20.9238		84.7546		182.734	62.0293	73.3603		46.7028		109.268	105.455	186.342				37.9766		69.3333	16.5906
GAS1-N40GS	FFYSNN[19.1087]GSQFYIR	1087	2	19.1444	145.049	3	b	1	72.9763	127.065		26.2695	254.158	51.6793		14.9626		15.5934		31.7979			5.82422				32.4681	14.0758	22.8678	87.513	38.1106	15.9827		74.8972	83.9242	71.6732
GAS1-N40GS	FFYSNN[19.1087]GSQFYIR	1087	2	19.1444	163.06	4	b	1		17.9227	222.663	53.0146	155.152	32.2746	64.78	70.0766	25.1612	111.663	16.4639	99.5719	104.531		11.3322	21.4617		33.4747		66.6459		162.597	82.9857	32.3139		32.9945		84.6868	182.54
GAS1-N40GS	FFYSNN[19.1087]GSQFYIR	1087	2	19.1444	168.065	5	b	1	9.94388	133.534					27.9854	98.4155	22.0072		82.3817	160.125	59.2434	23.7415		79.8756	41.5073	39.4279				33.8798	23.709		64.7772	25.6036	199.977	89.6132	29.6338
GAS1-N40GS	FFYSNN[19.1087]GSQFYIR	1087	2	19.1444	186.076	6	b	1	481.018		231.159				54.1055	12.9652	67.0442				136.898	109.446	61.9916	103.111		34.8353			36.286		104.354	206.796		33.8179	57.4316	202.95	26.6939
GAS1-N40GS	FFYSNN[19.1087]GSQFYIR	1087	2	19.1444	204.087	7	b	1	84.2979	158.279	9.00569	102.755	323.979	126.988		181.251	32.629	33.1622	38.6711			131.597		177.875	43.927			57.9649	218.799	225.734		121.87	99.2184			41.446	29.1994
GAS1-N40GS	FFYSNN[19.1087]GSQFYIR	1087	2	19.1444	366.139	8	b	1	90.6959			77.4508		165.671			325.867	281.483		7.32111	39.3546	114.313		49.071		261.454	25.194	65.424	113.771	15.7983			57.6156	40.9774	114.792	60.6	173.418
GAS1-N40GS	FFYSNN[1.1087]GSQFYIR	1087	2	0.332322	127.039	1	b	1						90.5215						37.7914	75.0601	10.7155	37.5577	30.7253	37.5327	34.037		37.5333	32.891		37.3706					39.6242	24.2203
GAS1-N40GS	FFYSNN[1.1087]GSQFYIR	1087	2	0.332322	138.055	2	b	1	35.196	37.3681	34.8592					6.84543	30.288				33.1774			15.1272	28.891		19.1689			35.184		34.347	18.1531			37.5186		9.04306
GAS1-N40GS	FFYSNN[1.1087]GSQFYIR	1087	2	0.332322	145.049	3	b	1	35.196	37.5336	71.7992		27.1423			28.1514	15.4582							45.1841								37.5009	37.37	37.5342			33.351
GAS1-N40GS	FFYSNN[1.1087]GSQFYIR	1087	2	0.332322	163.06	4	b	1		24.8149			34.0473	32.9107			186.589	31.0524		79.1738		23.8121	75.0186			34.0382						37.4634				36.3497		72.022
GAS1-N40GS	FFYSNN[1.1087]GSQFYIR	1087	2	0.332322	168.065	5	b	1			35.1829	20.7947		60.0964		89.042		9.6472	36.7679					33.4905		73.6625	73.5358		37.7271	31.0531	37.5334			37.5338	37.3698
GAS1-N40GS	FFYSNN[1.1087]GSQFYIR	1087	2	0.332322	186.076	6	b	1	36.8833			37.5342				32.0569
GAS1-N40GS	FFYSNN[1.1087]GSQFYIR	1087	2	0.332322	204.087	7	b	1			37.5305	26.1011	137.035		67.098	37.5274	31.2733		34.3134	37.5339	31.8074	14.077	31.4391					37.5326		22.7234							91.8873	23.5677
GAS1-N40GS	FFYSNN[1.1087]GSQFYIR	1087	2	0.332322	366.139	8	b	1							37.5328		36.3014			37.5339			20.2263		37.5099						37.5331				37.5339
GAS1-N40GS	FFYSNN[28.1087]GSQFYIR	1087	2	27.289	127.039	1	b	1					72.2442
GAS1-N40GS	FFYSNN[28.1087]GSQFYIR	1087	2	27.289	138.055	2	b	1			29.4229							58.954					36.8722		36.3924		6.99445			36.8721
GAS1-N40GS	FFYSNN[28.1087]GSQFYIR	1087	2	27.289	145.049	3	b	1					31.0523					23.8587												16.3843						16.0621		89.3472
GAS1-N40GS	FFYSNN[28.1087]GSQFYIR	1087	2	27.289	163.06	4	b	1	36.8786				32.5179										37.3901												36.8712			185.215
GAS1-N40GS	FFYSNN[28.1087]GSQFYIR	1087	2	27.289	168.065	5	b	1					37.5099			37.5335									75.0381												32.8043	37.5072
GAS1-N40GS	FFYSNN[28.1087]GSQFYIR	1087	2	27.289	186.076	6	b	1			35.8111							37.5336																			27.1131
GAS1-N40GS	FFYSNN[28.1087]GSQFYIR	1087	2	27.289	204.087	7	b	1																					23.5682						70.7039			59.6283
GAS1-N40GS	FFYSNN[28.1087]GSQFYIR	1087	2	27.289	366.139	8	b	1	11.3493							60.5728											29.6748		23.5682							66.8222
GAS1-N40GS	FFYSNN[30.1087]GSQFYIR	1087	2		127.039	1	b	1
GAS1-N40GS	FFYSNN[30.1087]GSQFYIR	1087	2		138.055	2	b	1
GAS1-N40GS	FFYSNN[30.1087]GSQFYIR	1087	2		145.049	3	b	1
GAS1-N40GS	FFYSNN[30.1087]GSQFYIR	1087	2		163.06	4	b	1
GAS1-N40GS	FFYSNN[30.1087]GSQFYIR	1087	2		168.065	5	b	1
GAS1-N40GS	FFYSNN[30.1087]GSQFYIR	1087	2		186.076	6	b	1
GAS1-N40GS	FFYSNN[30.1087]GSQFYIR	1087	2		204.087	7	b	1
GAS1-N40GS	FFYSNN[30.1087]GSQFYIR	1087	2		366.139	8	b	1
GAS1-N40GS	FFYSNN[26.1087]GSQFYIR	1087	2	25.2453	127.039	1	b	1					37.4835	37.5329															14.0764					37.5336				13.7849
GAS1-N40GS	FFYSNN[26.1087]GSQFYIR	1087	2	25.2453	138.055	2	b	1			50.6909			29.542			37.5331		75.0672	36.7205			37.6589					6.79706			37.5411
GAS1-N40GS	FFYSNN[26.1087]GSQFYIR	1087	2	25.2453	145.049	3	b	1		37.5334	26.6684							36.492			37.2297		37.5334			37.5396
GAS1-N40GS	FFYSNN[26.1087]GSQFYIR	1087	2	25.2453	163.06	4	b	1	23.5688										37.4493											37.5328			23.5676			33.4767
GAS1-N40GS	FFYSNN[26.1087]GSQFYIR	1087	2	25.2453	168.065	5	b	1								36.8723			37.5338	74.8981														37.5339				80.5022
GAS1-N40GS	FFYSNN[26.1087]GSQFYIR	1087	2	25.2453	186.076	6	b	1		37.5336	37.3893				106.824		26.9244	75.0678	75.0671						93.0336		25.9857			37.5362	37.5411				31.8606			80.2818
GAS1-N40GS	FFYSNN[26.1087]GSQFYIR	1087	2	25.2453	204.087	7	b	1	31.0533				37.5294												37.5338				35.7568	37.5349					37.5335	37.5336		26.2148
GAS1-N40GS	FFYSNN[26.1087]GSQFYIR	1087	2	25.2453	366.139	8	b	1	31.0535				37.4964	20.4539	33.4766	13.2595		29.6644			36.3497					37.5396	37.5328	35.1848		85.7599			5.82456
GAS1-N40GS	FFYSNN[25.1087]GSQFYIR	1087	2	25.2309	127.039	1	b	1			49.77		75.5034				31.0528								12.9883							37.659		37.5344			37.5331	104.325
GAS1-N40GS	FFYSNN[25.1087]GSQFYIR	1087	2	25.2309	138.055	2	b	1		74.2238	14.0759	30.8617	37.6189	10.8938			37.9162					38.5808			89.1703			8.21515			39.9785			37.5299	37.5094		73.4113	103.055
GAS1-N40GS	FFYSNN[25.1087]GSQFYIR	1087	2	25.2309	145.049	3	b	1	26.3662	31.0525	31.8013			35.5066			23.5682	35.1838		38.0786	151.156	29.6635			50.1673		43.6105		100.641			10.733
GAS1-N40GS	FFYSNN[25.1087]GSQFYIR	1087	2	25.2309	163.06	4	b	1	37.4219		63.3103	64.572	65.914	81.1799	106.412	75.2724			37.4877	34.283	31.4149		22.5208						14.0756	31.0547			37.248			37.5086	28.2043	109.303
GAS1-N40GS	FFYSNN[25.1087]GSQFYIR	1087	2	25.2309	168.065	5	b	1								28.5955					37.5308			37.5309	96.0814	35.2089					48.2365
GAS1-N40GS	FFYSNN[25.1087]GSQFYIR	1087	2	25.2309	186.076	6	b	1		81.2722	24.2188	18.026	15.427		33.0249			53.7901		37.5332	37.389				36.8713	49.2946	36.9746		23.568	31.0547	38.1909					16.7466		37.6635
GAS1-N40GS	FFYSNN[25.1087]GSQFYIR	1087	2	25.2309	204.087	7	b	1	33.4775	48.284				29.0507					37.5173	28.1681	102.229	37.0736								35.1832				75.0638	37.7292	187.947	34.4298	35.0381
GAS1-N40GS	FFYSNN[25.1087]GSQFYIR	1087	2	25.2309	366.139	8	b	1	28.1281		23.5684	31.0529	14.6345		33.4772			13.0613	36.7056	48.8752	37.5058	93.7112	14.0774	37.5335				37.5347	11.5943	66.3765			37.4878	21.135	33.1802		43.5995	249.199
GAS1-N40GS	FFYSNN[14.1087]GSQFYIR	1087	2	14.1987	127.039	1	b	1	3238.62	2280.54	4072.73	1873.66	2205.49	3079.82	1798.82	1646.27	1649.16	1480.67	1262.5		1984.52	1452.56	1149.32	333.379	1288.14	2516.9	872.984	278.155	408.835				333.545				136.861	6781.91
GAS1-N40GS	FFYSNN[14.1087]GSQFYIR	1087	2	14.1987	138.055	2	b	1	6169.67	4640.26	6019.73	2553.07	4810.64	8461.65	2197.34	3946.76	3084.53	3992.28	2192.5	1560.66	3363.82	731.17	2073.05	424.622	3239.84	4082.69	1722.58	596.139	2294.34						1583.71	2623.62	1446.28	9312.37
GAS1-N40GS	FFYSNN[14.1087]GSQFYIR	1087	2	14.1987	145.049	3	b	1	5564.06	4065.16	6909.92	2765.52	3601.68	6203.93	2127.79	4070.86	2267.63	2771.34	2873.38	2915.1	2808.62	916.725	2329.82	673.752	2443.97	3716.22	1246.1	1127.14	1491.18				563.369			1079.68	2856.23	16324.4
GAS1-N40GS	FFYSNN[14.1087]GSQFYIR	1087	2	14.1987	163.06	4	b	1	8268.32	4620.44	9819.61	6460.07	5576.14	12833.8	5885.01	4917.19	3681.87	4329.18	3618.32	4700.61	5525.75	518.23	2951.29	2237.97	5722.98	6945.22	1797.6	2563.61	2410.99						2086.6	1691.84	2490.64	21749.9
GAS1-N40GS	FFYSNN[14.1087]GSQFYIR	1087	2	14.1987	168.065	5	b	1	3425.98	2809.4	4695.82	2219.03	2844.94	4225.69	2016.09	2133.06	1952	1584.52	1037.38	1063	2388.29		1152.4	495.646	1242.85	3414.15	810.852	855.021	739.434						667.859	710.625	1736.69	4765.26
GAS1-N40GS	FFYSNN[14.1087]GSQFYIR	1087	2	14.1987	186.076	6	b	1	2350.38	2619.3	2439.74	721.223	1918.3	3516.53	796.528	1226.41	1629.84	959.126	819.604	846.783	1467.69	255.144	720.149	177.494	1401.49	1205.18	377.07	447.6	1288.45				288.36		849.769	374.12	903.466	16437.5
GAS1-N40GS	FFYSNN[14.1087]GSQFYIR	1087	2	14.1987	204.087	7	b	1	11414.7	7571.67	12368.8	3792.61	10629	13839.9	4579.12	6882.74	5930.96	5886.6	4013.49	3965.1	5740.85		3974	740.469	4630.05	8999.85	2606	2184.84	2713.61				1776.18			1615.17	4596.82	36967.2
GAS1-N40GS	FFYSNN[14.1087]GSQFYIR	1087	2	14.1987	366.139	8	b	1	4548.12	2741.19	4006.53	2454.8	3803.13	4429.92	1245.49	2720.89	2313.13	1992.54	892.54	1855.28	1869.56		2121.49	640.789	2579.3	2548.57	936.721	755.522	482.368				799.519			706.549	1732.25	12901.6
GAS1-N40GS	FFYSNN[18.1087]GSQFYIR	1087	2	18.0016	127.039	1	b	1	28.6982	351.676	49.3203		17.8352		138.275		66.442		123.956	209.417			76.0372			31.3564			49.7653	27.9428		269.157			29.0957	29.1196	64.4715
GAS1-N40GS	FFYSNN[18.1087]GSQFYIR	1087	2	18.0016	138.055	2	b	1			297.678		30.4903		85.7696			329.02	337.416	218.109		311.262	225.699	69.8555		123.902	148.733		213.515	87.721	85.4165			115.438
GAS1-N40GS	FFYSNN[18.1087]GSQFYIR	1087	2	18.0016	145.049	3	b	1	79.5364	37.4986				51.5426	137.864	46.5049	317.373	56.9738	30.2499	25.7262	211.181	52.7274	42.688		249.227	57.0371	55.8369	129.496	18.9046	60.5127			36.619	15.4019	84.0182	28.248	106.971
GAS1-N40GS	FFYSNN[18.1087]GSQFYIR	1087	2	18.0016	163.06	4	b	1	82.1766	109.545	53.8231		39.1301		48.4276	92.781	59.5253		199.926			157.477		21.0287	117.149		143.053	27.1003	154.089		71.6222					87.0801	144.049
GAS1-N40GS	FFYSNN[18.1087]GSQFYIR	1087	2	18.0016	168.065	5	b	1	154.571	522.675	61.0893		132.948	154.974	89.1401	166.736		111.359	167.47	396.972		279.237	120.877	131.338	129.972	84.5059		28.9197	23.773			131.588	33.6917		30.4269	121.638	47.1605
GAS1-N40GS	FFYSNN[18.1087]GSQFYIR	1087	2	18.0016	186.076	6	b	1	104.577	44.3083	318.702	198.604	191.377		162.282	151.636			22.9862	15.1844		281.342	75.144	186.057	91.8307	292.743	6.12667	38.2302	81.5151	145.207	55.2407		122.351	178.376	55.615		94.7894
GAS1-N40GS	FFYSNN[18.1087]GSQFYIR	1087	2	18.0016	204.087	7	b	1	364.172	199.718	149.09	148.599			130.484	121.813	347.644	52.6946	117.599		187.737	141.824	114.597	171.295		83.1109			170.607		97.7091	177.978	48.5055	283.179		14.6024	291.389
GAS1-N40GS	FFYSNN[18.1087]GSQFYIR	1087	2	18.0016	366.139	8	b	1	345.529	87.9731	236.46	133.598	83.2534		376.359	202.08	77.6225	100.544	291.764	93.0079	228.594		80.5313	29.701		476.285		148.03	317.498	75.4726	278.94	110.64	30.652	321.586	67.1464	96.0249	83.0958
GAS1-N40GS	FFYSNN[12.1087]GSQFYIR	1087	2	12.5226	127.039	1	b	1	6407.3	987.493	51900.9	959.98	1323			1282.71	3906.26		1434.27	11647		1848.04	452.014	2600.15	1552.21	2691.27		3121.05	9655.05	1704.61	11876.6	6750.07	841.897	7890.07	9987.49		4287.04	11463.4
GAS1-N40GS	FFYSNN[12.1087]GSQFYIR	1087	2	12.5226	138.055	2	b	1	280.484	717.187		782.139	1128.66		848.296	2170.31	238.057	774.36	2080.74		600.272	2775.58	1168.12	3267.85	2578.74		1285.77			1954.35	12005.2	9352.09	530.019	4153		3030.74
GAS1-N40GS	FFYSNN[12.1087]GSQFYIR	1087	2	12.5226	145.049	3	b	1	6989.82		55202.7	3248.99	1900.9			2320.52	5566.92		2819.57	15875.4		1830.67	1214.36	2477.06	3105.07	5251.72		1871.86	10799.8	2351.9	17783.4	11052.2	1360.97	9923.74	12384.2		7560.68	15565.5
GAS1-N40GS	FFYSNN[12.1087]GSQFYIR	1087	2	12.5226	163.06	4	b	1	5128.24	1732.26	31672.4		2816.25			3733.81	4211.6		3282.01	9399.3		2431.44	1538.87	3656.37	4984.07	2302.66			7160.19	3451.15	17150.2	16932.1	1850.42	12208.4	8115.19		5604.04	10766
GAS1-N40GS	FFYSNN[12.1087]GSQFYIR	1087	2	12.5226	168.065	5	b	1		757.086			516.385		431.171	1533.53	592.251	227.892	1203.08		780.166	728.827	719.915	1304.39	1566.63		444.295			871.494	7937.49	5012.2	645.156			2329.84
GAS1-N40GS	FFYSNN[12.1087]GSQFYIR	1087	2	12.5226	186.076	6	b	1		736.456		279.213	916.149		334.513	736.19			529.761		407.9	384.511	328.981	739.543	1093.22	258.581	676.459			590.322	3173.33	1695.49	123.315			884.087
GAS1-N40GS	FFYSNN[12.1087]GSQFYIR	1087	2	12.5226	204.087	7	b	1		2159.7		1732.08	3735.89		1933.35	3311.35	138.791	826.219	3542.37		3523.37	2739.13	2510.29	3123.41	3984.24		1610.52			2447.02	13864.8	12875.9	833.655	5296.31		5107.37
GAS1-N40GS	FFYSNN[12.1087]GSQFYIR	1087	2	12.5226	366.139	8	b	1				2076.96	2838.76		2180.09	759.177	1073.86	1262.2	1018.86		3708.82	2015.79	947.334	1084.7	1556.76	1497.89	1352.36	1396.75		941.942	5791.75	3373.96	593.02			1997.51
GAS1-N40GS	FFYSNN[9.1087]GSQFYIR	1087	2	8.36944	127.039	1	b	1			23349.4		1733.37			85.8446						87.7185	1048.44		1212.39				1844.14	135.349		206.936	353.132	1455.48	866.082	1096.02		2541.95
GAS1-N40GS	FFYSNN[9.1087]GSQFYIR	1087	2	8.36944	138.055	2	b	1	59.4293			149.563		57.0055		44.2875	247.582	107.793		21.8152	56.5879					35.6616	180.851			564.784	926.842	726.896	73.2289					1320.13
GAS1-N40GS	FFYSNN[9.1087]GSQFYIR	1087	2	8.36944	145.049	3	b	1			34475.3		3281.18						74.688				1235.4		697.174				1856.43	341.576	491.732	71.8174	212.547	1433.19	2699.37	966.412		3493.08
GAS1-N40GS	FFYSNN[9.1087]GSQFYIR	1087	2	8.36944	163.06	4	b	1			23660.7		3720.51			33.5626				125.985		175.266	1886.51		1862.4				1742.89	105.78	433.669	797.069	54.7644	1635.39	840.264	2116.64		5782.2
GAS1-N40GS	FFYSNN[9.1087]GSQFYIR	1087	2	8.36944	168.065	5	b	1	153.197			133.338		20.7781					128.376		38.066	43.9283								278.441	684.903	316.306
GAS1-N40GS	FFYSNN[9.1087]GSQFYIR	1087	2	8.36944	186.076	6	b	1	41.3646	63.1283		242.007		38.13			56.409	93.2632	30.3916	213.841	131.878		169.604							205.155	282.863	251.013						1480.42
GAS1-N40GS	FFYSNN[9.1087]GSQFYIR	1087	2	8.36944	204.087	7	b	1				166.382					116.862			19.4687		379.41		24.8753					179.459	485.941	1239.05	560.412						2561.9
GAS1-N40GS	FFYSNN[9.1087]GSQFYIR	1087	2	8.36944	366.139	8	b	1	224.918	113.78				140.431		140.975	111.741	22.806				94.801		43.9619		127.232	29.3494		183.632	103.611	482.117	231.037		148.539	158.83
GAS1-N40GS	FFYSNN[6.1087]GSQFYIR	1087	2	6.21969	127.039	1	b	1	28.9763	36.7062	7.25395	63.6757	8.97656	20.6562	69.9593		10.1886		12.2077	37.5332	37.5328				37.5342	74.5879		43.6812	48.1999	187.389	33.8155	115.923				53.3231		18.0097
GAS1-N40GS	FFYSNN[6.1087]GSQFYIR	1087	2	6.21969	138.055	2	b	1			31.0525	53.2093		12.9969			23.5688							37.3906				66.2753						6.71332				78.2094
GAS1-N40GS	FFYSNN[6.1087]GSQFYIR	1087	2	6.21969	145.049	3	b	1			50.2821			21.3769	104.998	15.7148		136.041				49.3444	249.038		37.5086	29.2375	89.0629	61.7476	111.58	34.7611	135.574	184.076	36.8708	37.5339	17.7219	186.735	26.925	38.1499
GAS1-N40GS	FFYSNN[6.1087]GSQFYIR	1087	2	6.21969	163.06	4	b	1	37.6566	216.892		15.5216			75.0679	36.6535		74.7522		37.2686	71.7135	108.512	17.7519	52.0674	205.287	112.594	104.464		74.2292	40.2611	148.574	35.8087		56.5977	31.0527	129.833	41.3227	150.152
GAS1-N40GS	FFYSNN[6.1087]GSQFYIR	1087	2	6.21969	168.065	5	b	1	37.5331		31.0523			14.0766		37.5956	26.8606	29.237			37.5335		37.5332			37.5325						43.5478					37.5336
GAS1-N40GS	FFYSNN[6.1087]GSQFYIR	1087	2	6.21969	186.076	6	b	1		37.5332	71.9256	53.7884	12.0799	51.9784			12.19			37.5329			37.5331	8.83223					33.06				36.8708
GAS1-N40GS	FFYSNN[6.1087]GSQFYIR	1087	2	6.21969	204.087	7	b	1			37.3893	31.0522	16.4314			36.7657	31.0526		17.7798	102.777		74.2334	65.2428	74.9983	37.4621	39.7432			85.0877							25.1173
GAS1-N40GS	FFYSNN[6.1087]GSQFYIR	1087	2	6.21969	366.139	8	b	1		28.8958									23.5675							37.39								37.5279
GAS1-N40GS	FFYSNN[17.1087]GSQFYIR	1087	2	16.2697	127.039	1	b	1	44.9556		1364.97		160.303	377.006	38.035				15.291	77.2726	89.6763	318.265	183.758				59.4587	11.0006	177.321	15.0208	36.3263	113.857		230.399		60.9582	21.8157
GAS1-N40GS	FFYSNN[17.1087]GSQFYIR	1087	2	16.2697	138.055	2	b	1		1104.91	1066.47	662.39	387.664			79.2876					202.052	161.618	1037.42	567.24					214.347	208.299	262.912		437.974		35.2481		23.236	29060.7
GAS1-N40GS	FFYSNN[17.1087]GSQFYIR	1087	2	16.2697	145.049	3	b	1	507.501	192.276	1710.11	32.5631	390.28	524.921		139.623		78.3318	167.067	541.896			34.013	128.873	126.665		140.143		152.645	197.504	69.1996			36.3791			34.4277	2938.01
GAS1-N40GS	FFYSNN[17.1087]GSQFYIR	1087	2	16.2697	163.06	4	b	1	328.49		2370.08		308.201	206.592	85.0408	234.741		46.573	232.831				55.975		60.6299	128.6	248.237	29.9568	16.4278	135.526			135.541	211.733			151.163	2342.49
GAS1-N40GS	FFYSNN[17.1087]GSQFYIR	1087	2	16.2697	168.065	5	b	1	71.7084	364.221	1027.76	880.987	247.773	128.713	182.35	114.667						241.98		71.1764		275.071		190.64	602.315	143.966	105.501	280.07	218.72			102.226		18347.9
GAS1-N40GS	FFYSNN[17.1087]GSQFYIR	1087	2	16.2697	186.076	6	b	1		185.83	730.428	312.223	37.3332	376.789				115.906	36.7721			217.83	499.959		90.9466	182.373	193.057	33.3491		257.52	30.6495		24.6504		27.7919		177.354	6933.82
GAS1-N40GS	FFYSNN[17.1087]GSQFYIR	1087	2	16.2697	204.087	7	b	1		734.129	313.246	782.946	41.1029	109.594	20.79	46.3109		123.542	14.8632		292.726	113.092	1113.71	378.975		332.904			375.93	493.162			483.229		81.5683	350.255		22959.3
GAS1-N40GS	FFYSNN[17.1087]GSQFYIR	1087	2	16.2697	366.139	8	b	1		932.937	708.242	625.004	657.584	98.0361	52.6723					424.418	444.854	58.1944	589.234	658.543				48.2507	354.61		461.694	138.711	238.931		210.77	155.82		18619.1
GAS1-N40GS	FFYSNN[21.1087]GSQFYIR	1087	2	20.6768	127.039	1	b	1	134.068	173.923		120.546	36.0504	85.9714	22.5189			112.271	33.8264		187.259	27.4002			5.48426						18.0566			23.5139	38.7533	93.3718	16.2711
GAS1-N40GS	FFYSNN[21.1087]GSQFYIR	1087	2	20.6768	138.055	2	b	1	126.296	128.549				53.2209		42.0281		19.1191			51.5004	17.0655	52.5434	74.2789	13.6821	67.489		105.738		23.6236	16.2493	60.1802	36.1578		126.982	70.6363
GAS1-N40GS	FFYSNN[21.1087]GSQFYIR	1087	2	20.6768	145.049	3	b	1	70.1858	53.8841	128.489	75.1085						109.303	91.8174	29.9592	21.9135		142.193	9.56718			37.5322	34.0257	61.7523		72.8136			15.7971	98.955
GAS1-N40GS	FFYSNN[21.1087]GSQFYIR	1087	2	20.6768	163.06	4	b	1	11.8868	58.4802	78.2029	16.4448	88.9479	113.792	35.1839	149.787	41.94	149.825			11.5564		22.8651		23.9243	34.6621	29.4503		19.3682	108.554	74.958				20.6753	68.7961	45.6285
GAS1-N40GS	FFYSNN[21.1087]GSQFYIR	1087	2	20.6768	168.065	5	b	1	110.81	300.618		254.599	101.131	221.993	68.9755	34.859				89.6618		49.8596	50.6159	43.1592	19.0138	101.749	73.8539	70.6006	20.9984		74.8321	36.4208	44.545		134.231	81.1905
GAS1-N40GS	FFYSNN[21.1087]GSQFYIR	1087	2	20.6768	186.076	6	b	1	455.332	85.4949	72.7538	53.6173	34.7119	311.619	129.854		42.9584	105.413		79.9783	90.8116	46.8658		77.4922		17.2581		23.5692		112.197	75.8413		32.4729	45.7489	56.975		78.7606
GAS1-N40GS	FFYSNN[21.1087]GSQFYIR	1087	2	20.6768	204.087	7	b	1	39.8841		113.877	7.9575	41.1337	45.4187	18.518	11.817	70.964	169.532		65.4221	32.6107	130.289	13.3892	15.4958				12.9914		11.1053		33.1393			165.183		91.9728
GAS1-N40GS	FFYSNN[21.1087]GSQFYIR	1087	2	20.6768	366.139	8	b	1	135.949	18.3598	141.853		46.695	48.4601	53.9791	74.0841	26.7135	262.149	45.896			81.1967		128.425	34.5955	82.6357	10.5111	45.7188	37.0743	80.4098	34.299	25.8544			111.022	83.0815
GAS1-N40GS	FFYSNN[29.1087]GSQFYIR	1087	2		127.039	1	b	1
GAS1-N40GS	FFYSNN[29.1087]GSQFYIR	1087	2		138.055	2	b	1										8.03349											36.8711	36.8721
GAS1-N40GS	FFYSNN[29.1087]GSQFYIR	1087	2		145.049	3	b	1																						16.3761								68.0865
GAS1-N40GS	FFYSNN[29.1087]GSQFYIR	1087	2		163.06	4	b	1					31.0539																						36.8712
GAS1-N40GS	FFYSNN[29.1087]GSQFYIR	1087	2		168.065	5	b	1								36.8717
GAS1-N40GS	FFYSNN[29.1087]GSQFYIR	1087	2		186.076	6	b	1																					37.4899									35.1842
GAS1-N40GS	FFYSNN[29.1087]GSQFYIR	1087	2		204.087	7	b	1																											70.7039
GAS1-N40GS	FFYSNN[29.1087]GSQFYIR	1087	2		366.139	8	b	1					31.0539			60.2095		57.8408
GAS1-N40GS	FFYSNN[7.1087]GSQFYIR	1087	2	6.30424	127.039	1	b	1	26.8035	802.513	8589.09	2318.4			222.693	1526.63					1357.39	1491.97	395.92	819.914	1741.23	1104.03	755.301	558.949	95.5599	746.323	797.907			504.989	1035.5	2453.2	2215.77	232.631
GAS1-N40GS	FFYSNN[7.1087]GSQFYIR	1087	2	6.30424	138.055	2	b	1		87.7839		300.768			100.57	557.133						135.285	87.0154	81.1358	141.205	233.354	72.7203	170.535						79.5389		269.38	431.371	288.306
GAS1-N40GS	FFYSNN[7.1087]GSQFYIR	1087	2	6.30424	145.049	3	b	1		1111.81	10499.7	826.915				823.999					2397.28	1298.39	744.624	1383.69	859.477	1019.19	1127.63	1818.67	213.535	1020.85	1274.41			819.549	1619.19	1563.8	1041.75
GAS1-N40GS	FFYSNN[7.1087]GSQFYIR	1087	2	6.30424	163.06	4	b	1	31.0343	792.647	7176.71	718.546			383.422	1326.33					1386.44	1435.66	740.284	896.393	728.1	642.366	332.645	909.469	55.3359	448.247	1501.93			696.517	1062.41	1202.85	1196.14	946.183
GAS1-N40GS	FFYSNN[7.1087]GSQFYIR	1087	2	6.30424	168.065	5	b	1							141.864	163.913					203.753	106.055		144.707			142.447	126.021	31.5525		238.389			125.077	144.927	116.844	271.332	129.962
GAS1-N40GS	FFYSNN[7.1087]GSQFYIR	1087	2	6.30424	186.076	6	b	1		131.781		278.024			258.98	96.4487			29.6485			477.023	29.6723	146.519	223.852	116.6		397.799	87.0003	123.64	264.866					461.628	64.8264	109.632
GAS1-N40GS	FFYSNN[7.1087]GSQFYIR	1087	2	6.30424	204.087	7	b	1		191.131		446.198			1055.62	691.896				34.9108	634.793	952.082	25.4192	396.017		337.585	194.45	228.293	702.666	507.952	443.088				209.475		393.241	638.833
GAS1-N40GS	FFYSNN[7.1087]GSQFYIR	1087	2	6.30424	366.139	8	b	1		55.3914		91.4418			236.548	342.382			269.237	31.0509	256.76		41.5019	44.2782	113.363			100.227	71.2684	84.7694	454.891				82.9411
GAS1-N40GS	FFYSNN[10.1087]GSQFYIR	1087	2	10.4081	127.039	1	b	1		1406.55						698.794	1885.69	2010.28	2032.58	1952.89	9509.59	4857.53	2760.73	643.632	7385.29		3936.41	2146.11		805.757	462.462	697.305	300.174	507.08	509.712	585.886	379.832
GAS1-N40GS	FFYSNN[10.1087]GSQFYIR	1087	2	10.4081	138.055	2	b	1		719.838		459.165	371.859	199.684		1115.84	957.919	872.354	1064.09	841.083	7692.04	3660.07	2076.15		6931.7	151.36	3473.71	2501.41	77.6735	426.468		240.254		1002.09	296.389	975.899	463.556
GAS1-N40GS	FFYSNN[10.1087]GSQFYIR	1087	2	10.4081	145.049	3	b	1		2460.4						2279.93	1885.61	3099.75	1235.68	2340.29	15453	7110.72	2531.63	656.294	13167.3		6388.07	3385.76		1045.69	1148.47		63.4211	1053.63	407.343	345.69	357.995
GAS1-N40GS	FFYSNN[10.1087]GSQFYIR	1087	2	10.4081	163.06	4	b	1		3414.19		872.825		295.441		2907.7	1879.45	3838.19	1922.26	3174.4	22682	10529.5	5899.34	1547.43	16881.3		7534.39	3417.88					302.25	944.75		1431.09	1512.46
GAS1-N40GS	FFYSNN[10.1087]GSQFYIR	1087	2	10.4081	168.065	5	b	1	59.556	1048.44	177.4		528.463	578.123	237.663	1232.03	416.919	1317.6	734.746	950.174	5650.05	2760.97	1953.86		3335.71		2076.21	1063.88	432.154	490.596				780.111	331.314	391.34	414.585
GAS1-N40GS	FFYSNN[10.1087]GSQFYIR	1087	2	10.4081	186.076	6	b	1				230.524	325.858	233.806	122.125	545.323	305.972	537.156	238.669	600.2	3540.54	1601.09	730.266		2594.7		1505.01	821.861	137.636		883.585		432.54	533.017	607.29		82.7102
GAS1-N40GS	FFYSNN[10.1087]GSQFYIR	1087	2	10.4081	204.087	7	b	1	87.1081	1332.11		471.179				1161.1	841.812	2425.78	913.286	2694.07	12691	6507.8	2919.61		11674.8		6454.86	2623.34		649.747	307.964		419.648	2870.77		745.233	920.529
GAS1-N40GS	FFYSNN[10.1087]GSQFYIR	1087	2	10.4081	366.139	8	b	1	1811.29		2788.61	2979.66	7208.4	6481.3	2835.99						3828.94		2095.61		6817.22	3283.71	4081.82	897.239	4215.18	2054.52	5071.27	3151.82		2028.28	3377.76
GAS1-N40GS	FFYSNN[20.1087]GSQFYIR	1087	2	19.7628	127.039	1	b	1	156.993	18.4924	201.96	145.336	36.7851	54.9653		20.9984	12.5267		32.5056	56.9575	11.6951				36.9531	22.8992	37.3704		17.8122	37.3885	21.5897	36.7674	108.065		33.1619		29.6029
GAS1-N40GS	FFYSNN[20.1087]GSQFYIR	1087	2	19.7628	138.055	2	b	1	83.1025	104.388	70.4919				193.55	35.988	66.7889	25.7158		140.394		160.51	97.0554	185.896		19.2846		110.684	193.36	34.745	31.0759				87.6192	127.079
GAS1-N40GS	FFYSNN[20.1087]GSQFYIR	1087	2	19.7628	145.049	3	b	1		118.187		121.021		168.444		36.3255	46.8736	84.1899		53.8996			37.3656	40.9344	65.6287	20.1798	32.4542	33.4764			103.341	10.6537			40.6757		145.259
GAS1-N40GS	FFYSNN[20.1087]GSQFYIR	1087	2	19.7628	163.06	4	b	1		78.3086		20.2716	81.6762	55.5875	51.7045	15.6345	106.734	73.36	31.7998		58.0232	76.6163				4.17375		97.0902		20.8066		36.0283		11.0845	29.0355		62.0751
GAS1-N40GS	FFYSNN[20.1087]GSQFYIR	1087	2	19.7628	168.065	5	b	1	138.996	70.9471	93.4133		26.9199	238.231	19.0962		30.9126		100.521	57.6532		94.5599	35.1247		57.9554			109.638	109.407	145.53	71.4427		74.1786	9.15355
GAS1-N40GS	FFYSNN[20.1087]GSQFYIR	1087	2	19.7628	186.076	6	b	1	80.7128	285.319	182.244	718.355			43.313	110.556		84.6133	123.407	65.6999			109.984	37.6449		144.043			59.9377			194.805				80.053	75.3423
GAS1-N40GS	FFYSNN[20.1087]GSQFYIR	1087	2	19.7628	204.087	7	b	1	52.2095		138.777	64.8309	19.3058		65.517	31.0525			207.701		23.6255	148.803		151.279	35.1109	215.826		33.2502	81.5752	36.7188		168.829	104.335	31.6149	88.783	73.0897	24.6009
GAS1-N40GS	FFYSNN[20.1087]GSQFYIR	1087	2	19.7628	366.139	8	b	1	419.648	631.06	536.36	141.868	145.377	262.426		87.7216		69.0778		26.8801			63.1623			137.14	20.9378	203.132		72.1566			46.5585	145.969
GAS1-N40GS	FFYSNN[20.1062]GSQFYIR	1062	2	19.5773	127.039	1	b	1	141.606	55.2531		23.7319	40.0573	93.7382	16.0852			94.5799			24.2212			36.8791	75.0666	23.2584		46.6972	15.0309	36.7295		59.2864	28.9054	67.4434	57.1485	30.0049	77.736
GAS1-N40GS	FFYSNN[20.1062]GSQFYIR	1062	2	19.5773	138.055	2	b	1	53.3368	50.2183			39.4197	115.767	173.466		17.517	92.2444	33.0156	40.1592		101.511	115.391			33.2935	25.4999	39.5129	55.2694	50.7064	149.615			17.8579		174.504	104.138
GAS1-N40GS	FFYSNN[20.1062]GSQFYIR	1062	2	19.5773	145.049	3	b	1		69.0518	86.4811		19.3758	70.5423			48.6671	252.819		78.1308	66.0368		121.934	16.4923	47.0343	344.09	32.3508	98.7049			33.6089		20.4538	73.8813	68.328		74.6816
GAS1-N40GS	FFYSNN[20.1062]GSQFYIR	1062	2	19.5773	163.06	4	b	1			8.19743		26.7586		29.0761	43.5942		29.3197		22.931	42.9817		144.168		13.3883	7.28857	14.0758			134.255	43.8178	64.5761		62.5038	98.171	71.6204	67.4228
GAS1-N40GS	FFYSNN[20.1062]GSQFYIR	1062	2	19.5773	168.065	5	b	1	149.733	212.087	9.71367	51.6163	96.5995	70.3919	23.0464	37.2653				32.6119	25.6855	78.1174		31.0576		83.5404	65.872		71.7572		36.3905	66.0051	33.6798		104.165	131.912	22.0097
GAS1-N40GS	FFYSNN[20.1062]GSQFYIR	1062	2	19.5773	186.076	6	b	1	86.5575	14.0335		130.366	56.9639			206.26	28.2514		19.3384				15.0072	84.1747	38.5696		45.106	154.024	9.69507	51.857		239.431	16.7443	15.1263	11.8253	11.3768	145.292
GAS1-N40GS	FFYSNN[20.1062]GSQFYIR	1062	2	19.5773	204.087	7	b	1	132.51	135.611	146.92	6.09547	97.9773		20.7779	27.5171		27.987	345.724			23.394	53.3512	32.5404	59.2763	26.1549		21.1338	34.1553		112.317			51.1632	34.1621	129.521	360.718
GAS1-N40GS	FFYSNN[20.1062]GSQFYIR	1062	2	19.5773	366.139	8	b	1	1941.5	793.089			75.7206		26.0365	46.8102		67.4984	253.705			114.684	180.868		94.2236	166.856	59.9134		78.1065	7.71582	120.393		96.9049		53.7463	32.7511	56.5864
GAS1-N40GS	FFYSNN[10.1062]GSQFYIR	1062	2	10.0922	127.039	1	b	1	1684.77		18272	3956.22	3962.46	3709.58	2085.46	1071.45	939.148	2357.63	1094.82	504.764	3510.58	2357.68	1637.52		4202.96	2563.05	2838.06		2023.88	601.768	10661	7007.88	474.726	292.161	2260.59	1704.58	1888.15
GAS1-N40GS	FFYSNN[10.1062]GSQFYIR	1062	2	10.0922	138.055	2	b	1	809.683			2700.81	1391.91	1632.35	1374.94	1144.46	178.83	1358.92	377.623	73.8181	3253.51	2662.58	1238.16	69.5964	3084.16	1345.9	2001.3		1460.99		23782.8	11373.4	2254.33		4005.9	3265.59	1753.9
GAS1-N40GS	FFYSNN[10.1062]GSQFYIR	1062	2	10.0922	145.049	3	b	1	1328.33		23970.3	3111.65	2901.43	2566.72	2567.29	1586.97	849.777	1771.14	608.058		4217.32	3102.18	1311.58		4472.73	2659.55	1914.53		1538.3	958.004	16926.2	11767.1	617.248	312.945	3485.85	2002.91	1257.19
GAS1-N40GS	FFYSNN[10.1062]GSQFYIR	1062	2	10.0922	163.06	4	b	1	1639.75		13516.8	2889.12		1342.22	1907.66	1698.67	322.268	1521.88		225.751	3521.32	2620.99	1338.08		4222.72	2106.53	1983.47		2373.07	1978.35	22147.1	12892.4	1015.63	241.934	3708.92	1582.45	2101.53
GAS1-N40GS	FFYSNN[10.1062]GSQFYIR	1062	2	10.0922	168.065	5	b	1	838.149			896.526	893.544	1121.65	557.533	282.587	77.3906	587.702	393.149	155.954	1509.05	1210.88	677.256	152.722	1976.15	909.356	1318.75	153.227	1260.72		13442.8	9890.25	476.207		2492.43	1311.56	1128.91
GAS1-N40GS	FFYSNN[10.1062]GSQFYIR	1062	2	10.0922	186.076	6	b	1	279.165			511.318	842.935	487.397	730.093	59.9623	220.927	186.31	387.049		821.19	618.738	258.815	66.3241	805.891	647.873	728.874	144.335	675.126	433.25	6910.1	3285.8	574.98	233.532	1212.41	812.338	1016.39
GAS1-N40GS	FFYSNN[10.1062]GSQFYIR	1062	2	10.0922	204.087	7	b	1	1250.75			2636.93		1907.51	1121.35	993.878	1031.07	871.02	668.196	177.749	3961.2	2389.13	1745.18	61.6651	3755.76	2008.24	2656.47		2312.97		29515.7	16615.1	2047.98	713.374	5538.81	2869.83	3136.69
GAS1-N40GS	FFYSNN[10.1062]GSQFYIR	1062	2	10.0922	366.139	8	b	1	934.844			544.513	1604.77	1111.45	658.18	635.326	281.608	762.063	498.816		2026.82	1030.11	800.238	44.1802	1858.98	949.987	606.073		685.319	918.152	9304.67	4982.01	1636.68		2278.9	1147.51	644.748
GAS1-N40GS	FFYSNN[26.1062]GSQFYIR	1062	2	25.7361	127.039	1	b	1							37.5085																				37.5332			30.7534
GAS1-N40GS	FFYSNN[26.1062]GSQFYIR	1062	2	25.7361	138.055	2	b	1											28.0806			37.5328			37.2686					66.0853
GAS1-N40GS	FFYSNN[26.1062]GSQFYIR	1062	2	25.7361	145.049	3	b	1			36.3497			26.1904				37.5333								21.8678									43.773			32.6378
GAS1-N40GS	FFYSNN[26.1062]GSQFYIR	1062	2	25.7361	163.06	4	b	1		31.997	37.5301			29.0247			37.5348		13.804	37.531														36.8715	37.5335			88.0671
GAS1-N40GS	FFYSNN[26.1062]GSQFYIR	1062	2	25.7361	168.065	5	b	1																												37.3913		17.441
GAS1-N40GS	FFYSNN[26.1062]GSQFYIR	1062	2	25.7361	186.076	6	b	1	76.0388			19.1815	67.609			39.8369	143.185	120.026	112.593		242.98	82.5665	78.4569	345.337	147.922	24.5347	212.775	175.113	114.556	197.146	225.235	242.247	199.151		150.067		116.844	30.6678
GAS1-N40GS	FFYSNN[26.1062]GSQFYIR	1062	2	25.7361	204.087	7	b	1		37.5297		56.7018	37.5334		37.5085				37.5338		37.5271		64.4022				39.3429	11.4646	26.8566	111.096		37.5341		31.0529	24.1901
GAS1-N40GS	FFYSNN[26.1062]GSQFYIR	1062	2	25.7361	366.139	8	b	1	37.5334		37.3894	26.8035		36.3503		75.0894			37.2692	37.5341	28.0226	34.0298	24.6371	37.5338			37.5327	61.1744			37.5409		37.534		92.0912	15.7667	37.4745	20.7559
GAS1-N40GS	FFYSNN[29.1062]GSQFYIR	1062	2		127.039	1	b	1																														55.2698
GAS1-N40GS	FFYSNN[29.1062]GSQFYIR	1062	2		138.055	2	b	1																														103.07
GAS1-N40GS	FFYSNN[29.1062]GSQFYIR	1062	2		145.049	3	b	1
GAS1-N40GS	FFYSNN[29.1062]GSQFYIR	1062	2		163.06	4	b	1
GAS1-N40GS	FFYSNN[29.1062]GSQFYIR	1062	2		168.065	5	b	1																														72.1786
GAS1-N40GS	FFYSNN[29.1062]GSQFYIR	1062	2		186.076	6	b	1																	23.5693
GAS1-N40GS	FFYSNN[29.1062]GSQFYIR	1062	2		204.087	7	b	1
GAS1-N40GS	FFYSNN[29.1062]GSQFYIR	1062	2		366.139	8	b	1																	5.82465													59.9734
GAS1-N40GS	FFYSNN[8.1062]GSQFYIR	1062	2	7.81064	127.039	1	b	1	2712.97	1632.91	4046.53	93.0324	2086.34	717.54	1137.81	1448.39	372.299	1172.2	1795.87	2968.26	1184.97	1026.83	265.838	549.175	1701.91		1346.84			1828.34	1227.64	340.488	926.426		2784.97		1057.55	2510.7
GAS1-N40GS	FFYSNN[8.1062]GSQFYIR	1062	2	7.81064	138.055	2	b	1	1794.68	2078.97		32.2395	1561.28	2136.93			1685.86		1733.55	2162.78	591.176	1598.84	234.004	823.755	585.86	570.681		1004.24	1796.74	752.526	415.065	93.766	114.119	746.156	1107.86	882.434	1645.52	2499.31
GAS1-N40GS	FFYSNN[8.1062]GSQFYIR	1062	2	7.81064	145.049	3	b	1	8317.28	5228.75	5127.29		1998.58	2590.16	1569.66	1918.36	3640.55		4669.08	4856.37	1159.58	1435.34	394.297	1176.01	1064.68		1550.38	944.872	1523.79	3016.62	2491.04	221.445	670.1	933.972	1076.87		2721.54	2509.14
GAS1-N40GS	FFYSNN[8.1062]GSQFYIR	1062	2	7.81064	163.06	4	b	1	11668.5	9558.38		696.675	6300.73	6115.18			5019.85		6205.33	10514.8	2493.81	2599.54	717.768	1447.43	1882.44	3595.18		3128.59	4950.12	1096.23	1780.62	785.603	541.47	1876.41	2156.76	3677.89	5921.39	2853.14
GAS1-N40GS	FFYSNN[8.1062]GSQFYIR	1062	2	7.81064	168.065	5	b	1	2122.83	1487.44		132.942	1332.72	794.848			922.737		1405.43	2218.66	769.387	657.827	104.79	369.642	825.688	567.4		574.397	1076.36	577.776	493.953		254.307	404.702	673.065	711.74	1314.18	1319.87
GAS1-N40GS	FFYSNN[8.1062]GSQFYIR	1062	2	7.81064	186.076	6	b	1	1315.13	566.135		151.707	723.959	1318.09			623.214	436.284	620.015	509.309	372.59	503.886	146.488	629.539	688.032	575.395	96.372	367.191	375.408	87.1613	308.128	117.924	399.27		306.354	643.208	554.673	947.806
GAS1-N40GS	FFYSNN[8.1062]GSQFYIR	1062	2	7.81064	204.087	7	b	1	8671.01	6293.25			4282.17	4232.36			4860.22		3879.67	7076.74	2868.81	3274.27	1326.27	2196.49	2496	2270.76		2103.47	3757.22	733.856	1232.65	636.044	1022.14	801.496	2507.37	3653.89	4782.17	2652.6
GAS1-N40GS	FFYSNN[8.1062]GSQFYIR	1062	2	7.81064	366.139	8	b	1	3192.6	3215.72			2052.18	2546.32			2384.29		2221.71	3343.63	1211.74	1208.41	733.541	1259.82	1055.63	908.595		902.308	1121.26	189.343	693.806	569.048	185.142	480.303	724.654	977.288	2315.97	1213.21
GAS1-N40GS	FFYSNN[4.1062]GSQFYIR	1062	2	3.8036	127.039	1	b	1		31.0537				37.5767			30.4963	75.0659	107.54	91.6029	30.9822	59.3933				22.1605	38.8395				37.567	36.8711	74.7521		37.4848
GAS1-N40GS	FFYSNN[4.1062]GSQFYIR	1062	2	3.8036	138.055	2	b	1	26.9235	24.5033	59.7667			45.9755	20.0472		36.872		14.0617		26.5895	67.3217	36.381	37.5341		37.5336		37.5227				36.8711	28.442	37.5332			7.04874	36.8359
GAS1-N40GS	FFYSNN[4.1062]GSQFYIR	1062	2	3.8036	145.049	3	b	1		36.8722		37.5342	37.3887	34.7456	36.5067		36.7831	28.8566		29.5243		72.2447		29.6752	153.26				28.981			37.5091		37.37		36.3507	34.0493	66.8211
GAS1-N40GS	FFYSNN[4.1062]GSQFYIR	1062	2	3.8036	163.06	4	b	1											36.3237								37.5091						37.5062	36.3499		37.5345
GAS1-N40GS	FFYSNN[4.1062]GSQFYIR	1062	2	3.8036	168.065	5	b	1								36.8723					13.5981		37.5332								37.5327					37.5071	32.1747
GAS1-N40GS	FFYSNN[4.1062]GSQFYIR	1062	2	3.8036	186.076	6	b	1	37.5329							35.1845					31.0531	36.8717			30.9652	36.7678
GAS1-N40GS	FFYSNN[4.1062]GSQFYIR	1062	2	3.8036	204.087	7	b	1				32.231				68.8518			37.529				66.3816						36.35	34.7455							37.5302
GAS1-N40GS	FFYSNN[4.1062]GSQFYIR	1062	2	3.8036	366.139	8	b	1			37.3897	33.817	37.5301		75.066	37.5096												37.5337		34.0471					37.5325	37.4792		14.0758
GAS1-N40GS	FFYSNN[5.1062]GSQFYIR	1062	2	5.64581	127.039	1	b	1	75.7166					37.2696	97.2986		36.3989		47.9111	36.3496	35.8734	73.8335	55.103	35.8553				4.61728		37.5341	69.7402	33.4778				6.42768		73.6337
GAS1-N40GS	FFYSNN[5.1062]GSQFYIR	1062	2	5.64581	138.055	2	b	1	36.8718	36.769		37.5936			33.8154	37.3892		66.49	183.943		69.9788	53.7601	50.4834		37.5297	75.0417				37.5317	61.4734		18.1538	31.0524		32.1845	7.04477	37.3895
GAS1-N40GS	FFYSNN[5.1062]GSQFYIR	1062	2	5.64581	145.049	3	b	1		37.5109	46.657		206.089	33.6707	44.5559	77.0342	11.084					75.0676	73.135	25.3366		37.5554	37.5326	20.4536	69.3878		184.054			31.0524			26.0607	112.243
GAS1-N40GS	FFYSNN[5.1062]GSQFYIR	1062	2	5.64581	163.06	4	b	1		112.567	140.759	36.7514	102.776		44.8584	74.2262		191.996	286.266		6.64296				129.152	146.62	29.6245		220.686		135.228	74.1785	36.9021	36.8713	23.2365			180.844
GAS1-N40GS	FFYSNN[5.1062]GSQFYIR	1062	2	5.64581	168.065	5	b	1	71.2878						36.8723		31.053	19.1031			36.2716		37.5332				37.5328	37.5331	36.872		37.5303				37.5334	75.0654	32.051	37.3895
GAS1-N40GS	FFYSNN[5.1062]GSQFYIR	1062	2	5.64581	186.076	6	b	1		32.9372			39.0994							36.7675	34.0481	37.5333	37.37					37.52	18.7975			56.5281			37.5334
GAS1-N40GS	FFYSNN[5.1062]GSQFYIR	1062	2	5.64581	204.087	7	b	1				39.2549	16.1064	41.0195			122.385		36.8714	29.6748				34.3443				116.025	33.932	17.7026	71.7878	75.0422				36.0169	25.1081
GAS1-N40GS	FFYSNN[5.1062]GSQFYIR	1062	2	5.64581	366.139	8	b	1			75.0642		11.089												37.5328
GAS1-N40GS	FFYSNN[15.1062]GSQFYIR	1062	2	14.4739	127.039	1	b	1	856.205	477.262	286.316		4336.73	4549.32	1500.61	1000.49	1071.95	1069.48	1134.57	1742.52	2086.02	915.406	1025.35	1146.5	2411.46	1626.74	824.572	1080.92	901.585	1250.66	2237.44	1877.26	469.87	4352.63	5140.25	2508.23	4638.76	11003.7
GAS1-N40GS	FFYSNN[15.1062]GSQFYIR	1062	2	14.4739	138.055	2	b	1	1125.66	826.529	1789.15	109.194	5618.4	6955.31	1562.61	787.312	2062.38	2106.64	449.248	1652.69	3014.07	2842.38	1331.66	2110.7	4598.39	1994.06	1511.08	1490.23	1212.32	1761.71	2837.67	1674.4	1221.35	6786.41	9726.24	5314.71	7452.49	14229.7
GAS1-N40GS	FFYSNN[15.1062]GSQFYIR	1062	2	14.4739	145.049	3	b	1	1357.04	903.047	1884.94		5658.63	7847.13	1829.43	1903.72	865.444	1461.57	1239.56	1451.94	3097.36	3129.55	1317.11	1102.55	4851.37	2303.02	1651.58	2234.71	1413.1	2016.96	4127.86	2728.11	730.698	7693.43	10250.6	5155.89	9455.53	20309.4
GAS1-N40GS	FFYSNN[15.1062]GSQFYIR	1062	2	14.4739	163.06	4	b	1	3320.54	897.534	2287.76	263.278	12531.9	15961.1	3512.6	2349.34	2479.21	3146.17	2781.83	3879.89	8154.83	3594.43	2688.1	2886.45	8426.52	5044.94	3088.43	2913.57	2132.67	4596.18	9071.99	4400.84	2481.47	15522.8	20674.2	9588.73	14898.6	33189.9
GAS1-N40GS	FFYSNN[15.1062]GSQFYIR	1062	2	14.4739	168.065	5	b	1	1128.9	211.235	798.005	420.977	3180.87	4989.28	1011.21	1323.41	678.256	986.405	1320.5	997.199	2198.69	938.689	1506.68	597.127	1913.44	1881.88	918.698	1503.98	561.529	1641.51	1726.21	739.967	849.936	3558.14	6482.86	2902.27	4864.2	8054.16
GAS1-N40GS	FFYSNN[15.1062]GSQFYIR	1062	2	14.4739	186.076	6	b	1	862.245	117.474			3211.92	3551.98	614.427	869.202	982.809	1419.29	477.088	449.665	1667.75	1132.66	1118.52	706.058	1796.35	1284.47	606.202	1241.13	784.03	576.601	1403.39	441.669	628.271	2091.03	3003.84	1684.08	2166.47	11682
GAS1-N40GS	FFYSNN[15.1062]GSQFYIR	1062	2	14.4739	204.087	7	b	1	1992.58	748.741	2507.25	238.836	12843.2	14034.6	2480.83	3111.93	1806.96	3592.59	4123.38	3438.59	7551.43	4109.99	3638.77	3547.9	6711.93	3872.52	2884.51	2442.97	1514.72	2823.16	5228.17	2449.73	2144.52	11953.5	17726.4	8014.66	12788	41029.8
GAS1-N40GS	FFYSNN[15.1062]GSQFYIR	1062	2	14.4739	366.139	8	b	1	1784.86	331.596	903.895	122.822	4998.68	5104.13	1419.76	1325.97	1041.43	1573.79	1707.79	1335.83	2407.41	1346.11	1005.3	1096.63	2365.38	1811.6	822.828	777.248	740.568	1437.12	1912.44	808.094	651.717	3990.34	4996.62	2700.01	4386.36	11417.4
GAS1-N40GS	FFYSNN[7.1062]GSQFYIR	1062	2	7.4716	127.039	1	b	1	1867.73		5732.81			2206.32			594.948						142.174					1688.65	2576.76		1307.96	755.748	1098.16	698.186	1893.79			4227.38
GAS1-N40GS	FFYSNN[7.1062]GSQFYIR	1062	2	7.4716	138.055	2	b	1	801.307				31.0541		31.0525						752.031			35.1672						23.5694	361.75	139.781	45.8754	241.842	601.182			3898.59
GAS1-N40GS	FFYSNN[7.1062]GSQFYIR	1062	2	7.4716	145.049	3	b	1			3842.73			1282.73									241.553					701.155	1431.81		2767.29	1510.44	190.471	1538.91	555.976			3793.29
GAS1-N40GS	FFYSNN[7.1062]GSQFYIR	1062	2	7.4716	163.06	4	b	1															497.437							31.04	1520.17	1115.16	664.445	715.535	1257.18			5227.85
GAS1-N40GS	FFYSNN[7.1062]GSQFYIR	1062	2	7.4716	168.065	5	b	1														36.8						96.2611			334.44	140.612	296.973	474.184	575.139			928.876
GAS1-N40GS	FFYSNN[7.1062]GSQFYIR	1062	2	7.4716	186.076	6	b	1					14.0763								314.577		48.2417					120.92			311.355	130.584	379.509	111.042	178.145			942.236
GAS1-N40GS	FFYSNN[7.1062]GSQFYIR	1062	2	7.4716	204.087	7	b	1							30.5931							36.7134	164.442	36.32							743.095	190.56	384.16	54.082	1442.04			2784.29
GAS1-N40GS	FFYSNN[7.1062]GSQFYIR	1062	2	7.4716	366.139	8	b	1							36.3131		83.7749						205.026							31.3287	239.764		129.556	182.489	432.668			840.968
GAS1-N40GS	FFYSNN[1.1062]GSQFYIR	1062	2	0.980872	127.039	1	b	1	37.2694									41.0822				37.5331	37.5335		37.5316	22.1582			32.1796				74.1957				58.5736	17.922
GAS1-N40GS	FFYSNN[1.1062]GSQFYIR	1062	2	0.980872	138.055	2	b	1	37.5345	5.65435	19.2789		9.10674		39.7062				36.9109						109.215			33.683		37.2691		36.3676	27.9413			36.8716	112.563
GAS1-N40GS	FFYSNN[1.1062]GSQFYIR	1062	2	0.980872	145.049	3	b	1	40.9515	36.3358		7.53741		26.9242		112.568	5.58266					43.2189		27.6591	49.3273		37.5343			30.6608		49.9803	74.2335		37.5238
GAS1-N40GS	FFYSNN[1.1062]GSQFYIR	1062	2	0.980872	163.06	4	b	1			74.227			94.1354	74.361					37.6368	22.5195				12.6627				29.3209		37.5068					60.5021		61.772
GAS1-N40GS	FFYSNN[1.1062]GSQFYIR	1062	2	0.980872	168.065	5	b	1					31.0533			41.7738	5.8256					34.7457	37.5337			33.4775	26.9249										37.5304
GAS1-N40GS	FFYSNN[1.1062]GSQFYIR	1062	2	0.980872	186.076	6	b	1		37.5333				37.5331						75.0681							37.5343					37.5317						33.7863
GAS1-N40GS	FFYSNN[1.1062]GSQFYIR	1062	2	0.980872	204.087	7	b	1					36.8718	33.4613	78.2845		14.0768		16.5485		19.274		36.4313	31.0525	29.0848	30.5264		16.4991		37.5249					34.0466	14.0759		36.7515
GAS1-N40GS	FFYSNN[1.1062]GSQFYIR	1062	2	0.980872	366.139	8	b	1				37.5337					23.5684	23.5683			5.17162					37.5341					37.5338
GAS1-N40GS	FFYSNN[13.1062]GSQFYIR	1062	2	13.4991	127.039	1	b	1	285.912	819.737	379.406	2046.9	3696.62	3012.11	177.574	1187.26		1151.82	536.643	1083.35	1479.6		852.41		2375.13	2311.89	1409.32	1215.75	617.82	3281.12	2034.73	2758.88	1609.87	6657.08	12531.2	14301.4	11104	15266.3
GAS1-N40GS	FFYSNN[13.1062]GSQFYIR	1062	2	13.4991	138.055	2	b	1	1861.83		1650.95	2547.21	5518.06	4510.44	1264.63	1814.59		1117.63	1848.47	2421.19	5769.75		2356.91		6182.43	3976.99	2934.45	3339.84	621.645	1263.05	4159.69	3113.9	1666	15072	22444.6	35112.7	25225.2	35079.4
GAS1-N40GS	FFYSNN[13.1062]GSQFYIR	1062	2	13.4991	145.049	3	b	1	1071.37	197.124	583.69	2617.61	4699.04	5726.83	573.68	2096.44		2017.03	1877.45	2368.22	3167.17		1122.67		5164.76	3020.58	1144.51	3227.19		2171.68	5309.73	4174.94	2650.88	12777.1	20889.4	27711.4	22433.3	28541.1
GAS1-N40GS	FFYSNN[13.1062]GSQFYIR	1062	2	13.4991	163.06	4	b	1	1835.66	458.871	2014.69	3377.63	5990.48	5418.16	1060.91	1984.12		2207.7	1811.1	3375.01	6003.44		3793.2		6860.51	3142.37	1607.77	4615.32	375.777	2172.52	7229.34	6019.21	2716.09	18367.3	29002.8	37647.5	28941.3	39963.7
GAS1-N40GS	FFYSNN[13.1062]GSQFYIR	1062	2	13.4991	168.065	5	b	1	586.742		940.613	1611.16	3891.05	3584	77.3629	915.476		1356.21	1423.82	1749.73	4155.88		1226.71		3598.1	2109.86	1507.27	1597.17	383.661	1090.38	1256.69	1316.68	664.622	10767.2	14551.3	21223.6	14992.7	21013.7
GAS1-N40GS	FFYSNN[13.1062]GSQFYIR	1062	2	13.4991	186.076	6	b	1	183.259	421.94	945.982	280.45	2471.2	1644.31	209.274			582.093	386.3	1024.28	2154.46		840.637	50.5257	2172.12	1688.86	837.659	1249.1	303.733	203.041		883.775	496.771	5061.78	6694.32	11347.8	8374.83	10983.5
GAS1-N40GS	FFYSNN[13.1062]GSQFYIR	1062	2	13.4991	204.087	7	b	1	380.567		776.87	3572.07	8529.43	8326.7	658.576	2967		2381.82	3033.56	4108.5	12278		3749.89		10010.3	6196.32	3656.57	4906.03			4441.87	4254.98	1824.03	25428	36089.5	57207.4	45827.7	56598.2
GAS1-N40GS	FFYSNN[13.1062]GSQFYIR	1062	2	13.4991	366.139	8	b	1				1705.89	3563.6	2696.89		1310.01		1307.48	1537.94	1218.98	3963.57		1855.41	474.284	3410.2	2424.8	1016.01	2842.47	812.53		1580.85	1662.51	1038.57	8240.62	13708.9	22445.4	13675.3	18407.6
GAS1-N40GS	FFYSNN[18.1062]GSQFYIR	1062	2	18.0642	127.039	1	b	1	120.047	51.0856				44.6827	29.6747		44.2887		23.3809			36.8109	8.18219		35.8088	33.4441	26.0537		28.7519	92.2368		216.377	36.8679		124.315	159.564	14.1635
GAS1-N40GS	FFYSNN[18.1062]GSQFYIR	1062	2	18.0642	138.055	2	b	1	619.201	17.9832		76.5447	142.813	188.121	39.3921	110.994	115.67	69.6235	79.5416		136.156	115.52	85.2234						113.145		124.624		4.01656	87.8779			58.5734
GAS1-N40GS	FFYSNN[18.1062]GSQFYIR	1062	2	18.0642	145.049	3	b	1				125.371		399.943		119.475	16.0077	28.9915	21.6659		607.44	29.9029	98.2867	68.6939	147.87		28.2039		32.9626	92.7258	78.7308	104.525	55.2079			56.2435	46.2679
GAS1-N40GS	FFYSNN[18.1062]GSQFYIR	1062	2	18.0642	163.06	4	b	1	137.327	138.972	50.5103	57.0326	48.4703		174.02	72.003		71.215			66.3213		188.225	16.3403	110.655	20.4915			36.3349	53.5919	11.8969	55.1951	30.8952	376.06	205.326	129.052	167.031
GAS1-N40GS	FFYSNN[18.1062]GSQFYIR	1062	2	18.0642	168.065	5	b	1	109.245		108.433	23.2949		76.1048	76.771	146.848	85.6483	264.379	85.713		133.127	30.1677			58.2621		30.2929	9.14805		57.8944		133.089		27.0426	191.902
GAS1-N40GS	FFYSNN[18.1062]GSQFYIR	1062	2	18.0642	186.076	6	b	1	72.2033	37.6492	148.053				46.1683	187.762		23.7227	29.1724	54.6783	140.876		126.425	27.423	28.7003	118.02	168.915	84.3202			157.113		24.3699	169.126	42.6709	23.4854	89.7151
GAS1-N40GS	FFYSNN[18.1062]GSQFYIR	1062	2	18.0642	204.087	7	b	1		357.876		80.8329	80.4968	422.722	47.5597			58.7351		87.6356				75.9544	165.168		111.142	140.493			39.2192		50.2572	38.7136	66.6105	83.4345	131.185
GAS1-N40GS	FFYSNN[18.1062]GSQFYIR	1062	2	18.0642	366.139	8	b	1	15.0913	170.095	101.338		13.7087	278.692	119.776	66.7748		147.211	156.971	63.9963	182.263		141.257	56.269	382.791	117.743					79.534	128.112		88.0889	121.886	86.5698
GAS1-N40GS	FFYSNN[2.1062]GSQFYIR	1062	2	1.92189	127.039	1	b	1							36.3341			8.3751		22.037		14.0755		75.039	52.4584	18.336	32.9863					38.1354	37.4908					7.0959
GAS1-N40GS	FFYSNN[2.1062]GSQFYIR	1062	2	1.92189	138.055	2	b	1		111.226		37.5327	16.4515		5.90028								52.0661					13.2347	37.5339	75.0675				37.5273	37.5333	37.5338	29.6755
GAS1-N40GS	FFYSNN[2.1062]GSQFYIR	1062	2	1.92189	145.049	3	b	1	26.9137							36.3134	35.2344						36.9481	37.3885				37.5333		108.132		36.5815	37.5336				37.5338
GAS1-N40GS	FFYSNN[2.1062]GSQFYIR	1062	2	1.92189	163.06	4	b	1		74.7282	36.863		37.5341			75.0681		29.3603		23.5681	34.3598	23.5683			36.2413		37.5323			37.5302	23.5687			16.3813	37.2512	64.7897		35.5667
GAS1-N40GS	FFYSNN[2.1062]GSQFYIR	1062	2	1.92189	168.065	5	b	1	75.0367					30.7955			37.5349					5.82361				32.333				37.5316			37.5315
GAS1-N40GS	FFYSNN[2.1062]GSQFYIR	1062	2	1.92189	186.076	6	b	1			37.5332	45.9771											5.90145												37.5339
GAS1-N40GS	FFYSNN[2.1062]GSQFYIR	1062	2	1.92189	204.087	7	b	1	37.1671	31.9505	37.5338	26.9228		183.665		37.5344	37.534	36.872			26.5991	14.0755		37.5303		32.333			35.0033			31.5646				33.8665		12.9942
GAS1-N40GS	FFYSNN[2.1062]GSQFYIR	1062	2	1.92189	366.139	8	b	1		37.2775						37.5327	37.5337			23.5681	38.0339					35.1506					23.5687
GAS1-N40GS	FFYSNN[3.1062]GSQFYIR	1062	2	2.94868	127.039	1	b	1					53.3165					8.949	38.4592	35.3299	29.2943	35.4339	37.5332	74.8976		75.0674	37.5341		14.4447	37.5216		37.5333	16.5061		75.6788	35.1838	23.5682	16.9352
GAS1-N40GS	FFYSNN[3.1062]GSQFYIR	1062	2	2.94868	138.055	2	b	1	30.5329						14.9124														23.5691		37.5333	29.6744	75.0381
GAS1-N40GS	FFYSNN[3.1062]GSQFYIR	1062	2	2.94868	145.049	3	b	1					32.3287		12.1332				27.9577		67.8683	42.0477		37.3697							37.5332				37.5343	65.861	34.3048
GAS1-N40GS	FFYSNN[3.1062]GSQFYIR	1062	2	2.94868	163.06	4	b	1		37.2685	36.8711				37.5334			29.3792	30.3862	37.533			37.5295			74.8849				41.6885		38.2046		32.7218		35.1838	23.5682	55.7598
GAS1-N40GS	FFYSNN[3.1062]GSQFYIR	1062	2	2.94868	168.065	5	b	1	37.5332		26.9243	37.5336		37.3716		37.5344	37.9111					37.4875						37.5336					26.9247	6.06353
GAS1-N40GS	FFYSNN[3.1062]GSQFYIR	1062	2	2.94868	186.076	6	b	1				67.6693				37.5344
GAS1-N40GS	FFYSNN[3.1062]GSQFYIR	1062	2	2.94868	204.087	7	b	1		33.4766		53.3985				69.5647	37.5327	37.5341			93.037	31.7411	28.2164	37.5055				37.5302	29.9858	37.4886								16.264
GAS1-N40GS	FFYSNN[3.1062]GSQFYIR	1062	2	2.94868	366.139	8	b	1			65.8614			75.0672		37.5337				37.533	63.9316						37.5342							36.8711				37.5344
GAS1-N40GS	FFYSNN[24.1062]GSQFYIR	1062	2	23.9673	127.039	1	b	1	60.1305	25.5477		26.0325		23.6522	16.506	69.8706		63.3942		63.4046						37.9951		37.5341		37.5333	35.9038	34.9897		82.7024		22.9833	28.5186	318.289
GAS1-N40GS	FFYSNN[24.1062]GSQFYIR	1062	2	23.9673	138.055	2	b	1	143.791		139.597		25.453	120.7	102.723	68.1843		29.0517	154.693	96.2694	17.4588	112.253	63.1642			120.139	147.761			101.05				109.413	149.432	24.6921	33.4163	445.148
GAS1-N40GS	FFYSNN[24.1062]GSQFYIR	1062	2	23.9673	145.049	3	b	1			23.789	33.9137	29.7952	10.2529			75.3237	99.9312	36.8338	14.0767	6.50962				14.076		37.5354			37.5061	37.5272		37.5345				36.3318
GAS1-N40GS	FFYSNN[24.1062]GSQFYIR	1062	2	23.9673	163.06	4	b	1		21.4925	42.3693			160.098		21.0109		57.9467	92.6807	37.5307	35.2375	37.2763	31.3335		6.24623	37.5334					108.89	188.224		35.9836	175.992		37.9683	230.632
GAS1-N40GS	FFYSNN[24.1062]GSQFYIR	1062	2	23.9673	168.065	5	b	1	37.5817	61.5294				123.029	35.1835	25.1073				46.9774		41.0207				37.5334	60.2212	27.7333	14.8631			54.864			110.963		138.417	186.172
GAS1-N40GS	FFYSNN[24.1062]GSQFYIR	1062	2	23.9673	186.076	6	b	1				7.20273	72.3861	121.581	34.0149		69.2228	90.3309	26.9246	125.253		150.257		87.349	3.46527	42.5231		40.415	27.7919				37.5346	50.6849			4.96903	639.272
GAS1-N40GS	FFYSNN[24.1062]GSQFYIR	1062	2	23.9673	204.087	7	b	1	37.7026	56.0509	15.3402	159.159	88.8549	57.4431			16.5059	126.668	19.9229	136.311		56.3608	37.5307	57.9834	29.0133					28.7365	34.856	37.4143	19.5847	74.8971	26.1277	38.1931	26.9219
GAS1-N40GS	FFYSNN[24.1062]GSQFYIR	1062	2	23.9673	366.139	8	b	1	7.31275	76.8159	79.1759			81.877				47.3849	11.0546	21.2958	133.593				39.8819			56.5734	74.275	187.185		33.4754		47.5975
GAS1-N40GS	FFYSNN[11.1062]GSQFYIR	1062	2	11.2354	127.039	1	b	1		1218.66		1897.76	796.567	1292.8	2435.64	968.328	1754.63	1196.71	226.57	3011.24				772.256	1965.58	2179.01		680.871	1548.18	2170.5	9096.05	1526.41	476.322	2365.17	1843.42	2858.95	3283.43	4191.1
GAS1-N40GS	FFYSNN[11.1062]GSQFYIR	1062	2	11.2354	138.055	2	b	1	2538.51	1866.68	2526.97		729.412	3164.55		1377.43		1257.03	961.391	2883.26				690.807			717.851				17349.1	2344.22	1645.39	3437.53	3093.66
GAS1-N40GS	FFYSNN[11.1062]GSQFYIR	1062	2	11.2354	145.049	3	b	1	1443.88			5367.29	2057.51		6806.61		3667.75		1325.27	3840.79				1135.15	3822.25	2557.14		2735.83	4143.79	2435.25	14178.3	2126.78	695.89	3102.03	2695.43	5852.57	4858.94	9671.66
GAS1-N40GS	FFYSNN[11.1062]GSQFYIR	1062	2	11.2354	163.06	4	b	1	3836.48			7578.94		2435.63	9997.42		3258.54	2095.57		4323.28				1058.11	6035.19	5469.71		4316.78	3696.15	6450.06	16779.6	3425.95	1115.2	3364.54	2755.46	8847.84	8228.93	13257.9
GAS1-N40GS	FFYSNN[11.1062]GSQFYIR	1062	2	11.2354	168.065	5	b	1	699.95	1179.97	1315.66		650.133	1222.96		1113.11		1210.36	1115.85	1999.86		687.899		432.189			381.763				10085.3	220.008	379.963	2334.95	1983.47
GAS1-N40GS	FFYSNN[11.1062]GSQFYIR	1062	2	11.2354	186.076	6	b	1	2436.96		1208.16	1196.27				657.89		1312.26	652.227	738.804					1248.91	519.596		361.526	137.887		4965.91	334.021	515.103	971.001	868.392
GAS1-N40GS	FFYSNN[11.1062]GSQFYIR	1062	2	11.2354	204.087	7	b	1	3384.6	1172.84	4311.96		3449.47	4616.4		3351.64		3155.88	1716.9	5689.85				1253.66			1405.18				21885.9	962.445	2343.6	3777.77	3682.31
GAS1-N40GS	FFYSNN[11.1062]GSQFYIR	1062	2	11.2354	366.139	8	b	1	353.627	499.913	2108.24		844.353	1753.3		1219.07		1111.71	1487.52	2602.4		191.675		713.531			638.127				6780.69	1092.53	1516.45	1578.17	1433.86
GAS1-N40GS	FFYSNN[19.1062]GSQFYIR	1062	2	19.5751	127.039	1	b	1		96.5613	90.8704		91.265	47.7679	97.5084	37.5263	29.6753	88.3806			122.518		37.3122	37.5089	65.8605	70.0298	26.9228	31.1035	14.6814				28.5233	45.2021			38.2349
GAS1-N40GS	FFYSNN[19.1062]GSQFYIR	1062	2	19.5751	138.055	2	b	1	49.0846	326.478	305.923	83.3964		22.0624	45.9931	33.1585	178.519		39.0871	104.258	76.9639			19.334				63.2321	54.7619	58.44	167.585	48.8675		186.147			66.0903
GAS1-N40GS	FFYSNN[19.1062]GSQFYIR	1062	2	19.5751	145.049	3	b	1	50.3497			159.648		195.232		11.1106	105.668	186.545				17.8278		89.7541	32.238	66.7016	28.0721	98.4122		12.2662				32.3598	114.197	47.1366	39.7841
GAS1-N40GS	FFYSNN[19.1062]GSQFYIR	1062	2	19.5751	163.06	4	b	1		106.709	36.105	143.403				36.203	77.6914	16.5056	111.122		111.255	77.6715		47.2913	28.9145	33.0829								113.074	64.1076		166.972
GAS1-N40GS	FFYSNN[19.1062]GSQFYIR	1062	2	19.5751	168.065	5	b	1	131.407			34.2899	52.8209			108.14		66.2451	22.2276			54.9921		134.572		88.2969	70.8506		70.9429			46.9738	23.5686	116.339
GAS1-N40GS	FFYSNN[19.1062]GSQFYIR	1062	2	19.5751	186.076	6	b	1	161.625	128.59				702.166	183.356	289.251	183.246	26.843	65.6498	90.4782	115.013	56.5854	135.369	117.527	45.6323			136.05	29.5064	29.3094	147.979	100.776	26.7101	52.1049	75.6685	24.8062	71.0292
GAS1-N40GS	FFYSNN[19.1062]GSQFYIR	1062	2	19.5751	204.087	7	b	1		54.2166		43.7986				31.8589	31.9678	97.6486	89.6915		275.253		39.7263	349.445		105.999		61.1972	156.698	80.9679	269.205	89.1496		70.5199	138.626	74.4561
GAS1-N40GS	FFYSNN[19.1062]GSQFYIR	1062	2	19.5751	366.139	8	b	1	810.699		68.5323		261.387	177.118	77.3561	70.6452				118.221	26.3075	262.261		29.2997		47.3551	13.3033		89.1453	118.876	66.477		103.085	274.252		90.6911
GAS1-N40GS	FFYSNN[28.1062]GSQFYIR	1062	2		127.039	1	b	1				31.6775																31.053
GAS1-N40GS	FFYSNN[28.1062]GSQFYIR	1062	2		138.055	2	b	1				37.5341		14.0758	5.34674																37.5337
GAS1-N40GS	FFYSNN[28.1062]GSQFYIR	1062	2		145.049	3	b	1									37.5332					37.5343	37.5094							37.5332								16.5065
GAS1-N40GS	FFYSNN[28.1062]GSQFYIR	1062	2		163.06	4	b	1															37.2679							37.3321								23.56
GAS1-N40GS	FFYSNN[28.1062]GSQFYIR	1062	2		168.065	5	b	1																														66.8217
GAS1-N40GS	FFYSNN[28.1062]GSQFYIR	1062	2		186.076	6	b	1												37.5339		37.5064		37.5332	37.5342			36.871	37.5337	75.0675								35.1836
GAS1-N40GS	FFYSNN[28.1062]GSQFYIR	1062	2		204.087	7	b	1				37.5358		31.0534											37.5329				37.5064					28.1932
GAS1-N40GS	FFYSNN[28.1062]GSQFYIR	1062	2		366.139	8	b	1				150.137			23.8741		18.8455			37.5339				37.5332	48.4024						37.5337			37.3883				14.0758
GAS1-N40GS	FFYSNN[21.1062]GSQFYIR	1062	2	21.1217	127.039	1	b	1	53.2869	23.4388	12.2898	108.361	56.1623	84.0608	35.8291	70.472	36.0549		37.5335		211.251	32.4586		36.3576					34.2364	32.0972		32.4591	37.3714	40.9945	30.5792	29.6745
GAS1-N40GS	FFYSNN[21.1062]GSQFYIR	1062	2	21.1217	138.055	2	b	1			159.065	42.1114	139.491	82.7886		37.5061		12.9706		53.8515	31.3319	54.5701	76.9253		90.7221	57.3814			31.9096		83.18	215.551	111.104		124.534		35.2954
GAS1-N40GS	FFYSNN[21.1062]GSQFYIR	1062	2	21.1217	145.049	3	b	1		134.113		34.5314		60.971				56.6372		74.0552	167.3	14.8121	68.0995	32.2377	225.85		66.657	37.5306	85.4916				37.3879	48.7064		66.9359	98.4393
GAS1-N40GS	FFYSNN[21.1062]GSQFYIR	1062	2	21.1217	163.06	4	b	1	35.8714		103.164	69.1718				55.7453	97.6362		31.0965	24.3351	103.639		53.1623	58.8305	42.0192	73.271	9.04064				37.2056	22.6262	35.892	37.5322	27.1559	37.526	191.469
GAS1-N40GS	FFYSNN[21.1062]GSQFYIR	1062	2	21.1217	168.065	5	b	1	61.2182	262.01	136.204	26.7108	157.052	25.8659				77.9227	16.5053	26.0648		148.313	37.6469	45.2802	94.4382	89.3106		71.0807	31.386	91.9564	28.5324	36.247		198.583			28.7993
GAS1-N40GS	FFYSNN[21.1062]GSQFYIR	1062	2	21.1217	186.076	6	b	1		90.8543	375.712	65.7316	196.05		63.7332	19.6756		58.8778		52.0351	29.0194	13.3803	170.154	103.431		26.03	29.673	14.379		12.4299				25.3606		135.814
GAS1-N40GS	FFYSNN[21.1062]GSQFYIR	1062	2	21.1217	204.087	7	b	1		14.3303	280.341	172.376	134.675		64.9835	44.6474	19.6424	77.7636		50.6968				32.2894	56.0134		22.8176				141.143	49.2662	38.38	119.813	121.1		316.906
GAS1-N40GS	FFYSNN[21.1062]GSQFYIR	1062	2	21.1217	366.139	8	b	1	474.461			214.792	79.4902		69.9357		31.353	197.108	74.0803			36.7198			76.3333			12.7288		27.3653	119.385	5.76753	3.71163	115.873	134.741	73.6632	75.0529
GAS1-N40GS	FFYSNN[27.1062]GSQFYIR	1062	2		127.039	1	b	1														29.1315						37.5339	19.4034			23.5683	75.0678					8.90031
GAS1-N40GS	FFYSNN[27.1062]GSQFYIR	1062	2		138.055	2	b	1			75.0669			37.5332	5.32614							33.0193					37.3625		23.5687									47.0215
GAS1-N40GS	FFYSNN[27.1062]GSQFYIR	1062	2		145.049	3	b	1				8.41927				35.1841							37.5108		53.7903	21.9691					37.5336	5.82509						11.1461
GAS1-N40GS	FFYSNN[27.1062]GSQFYIR	1062	2		163.06	4	b	1												37.531	37.5348		37.5081								37.5336		37.5341					70.3655
GAS1-N40GS	FFYSNN[27.1062]GSQFYIR	1062	2		168.065	5	b	1																					31.0535						37.5344
GAS1-N40GS	FFYSNN[27.1062]GSQFYIR	1062	2		186.076	6	b	1			36.7675	62.422				35.1841					37.494			23.5685		25.906	39.0303			37.0188		20.5429			37.5344			118.398
GAS1-N40GS	FFYSNN[27.1062]GSQFYIR	1062	2		204.087	7	b	1					35.1783	37.5341							37.535				5.82404					37.5331	37.5337			28.6995				14.9294
GAS1-N40GS	FFYSNN[27.1062]GSQFYIR	1062	2		366.139	8	b	1					35.1783		23.7821					37.51				23.5685	9.91168			37.5339						36.6456
GAS1-N40GS	FFYSNN[14.1062]GSQFYIR	1062	2	13.4974	127.039	1	b	1	699.563	275.23	308.713	3591.33	4293.58	6372.91	1240.06	1053.68	798.485	199.942	985.967	1498.37	6435.21	1665.02	587.899	781.187	5069.69	1932.88	534.906	907.96	293.814	1203.95	2364.14	1053.22	546.43	939.293	4535.76	233.878	2560.25	9877.22
GAS1-N40GS	FFYSNN[14.1062]GSQFYIR	1062	2	13.4974	138.055	2	b	1	1282.55		1625.36	5737.46	7320.18	9949.98	1132.73	1709.88	2259.6	1128.42	456.401	1918.63	10547.8	3205.42	1163.58	2048.19	7982.57	2654.55	1574.96	1190.61	888.53	1596.59	2609.01	966.856	1404.21	1179.83	7315.2	1098.71	4896.29	23508.7
GAS1-N40GS	FFYSNN[14.1062]GSQFYIR	1062	2	13.4974	145.049	3	b	1	666.536	576.698	1771.28	6402.23	7268.75	11585	1541.35	2433.06	902.246	164.546	1193.59	1525.98	11546.9	3579.06	1622.39	993.101	7796.19	2907.04	940.082	1658.97	974.156	2127.81	3648.54	2256.05	927.448	1437.07	9199.61	862.383	6294.58	12955
GAS1-N40GS	FFYSNN[14.1062]GSQFYIR	1062	2	13.4974	163.06	4	b	1	1760.03	1464.93	3187.41	10125.5	13014.7	19126.1	3003.01	3807.42	1846.99	89.1676	2694.31	4025.34	17133.8	5080.18	3545.24	2818.24	12704.3	6173.1	1339.85	2319.66	1695.52	4814.2	8514.1	4062.37	2407.95	3213.76	15685.8	554.657	12348.5	24172.2
GAS1-N40GS	FFYSNN[14.1062]GSQFYIR	1062	2	13.4974	168.065	5	b	1	182.328	613.265	687.805	3824.2	4893.4	7851.18	885.191	2484.94	712.892		1162.32	1352.53	7248.03	1989.46	1873.05	594.796	4055.14	2242.41	889.918	1245.1	871.562	1103.98	1451.93	679.677	829.313	900.275	5883.98	560.807	3442.32	11334.9
GAS1-N40GS	FFYSNN[14.1062]GSQFYIR	1062	2	13.4974	186.076	6	b	1	198.241	1162.98	651.378	2430.79	2687.36	2717.49	714.686	923.708	878.621	35.5746	583.858	532.381	3804.7	1845.06	720.427	760.636	2331.83	1439.81	759.542	1309.09	409.024	650.472	1173.88	371.353	626.282	565.669	3214.68	348.251	2140.38	16128.8
GAS1-N40GS	FFYSNN[14.1062]GSQFYIR	1062	2	13.4974	204.087	7	b	1	925.256	1382.29	2112.77	12237.3	15361.2	18700.2	2261.36	3588.6	2474.45	138.251	2919.42	3027.82	20504	6684.08	3207.31	3129.64	16123	4711.17	1441.4	2393.5	2411.25	2802.28	4997.98	1924.46	1663.76	3183.09	14703.4	1571.32	8546.78	39039.6
GAS1-N40GS	FFYSNN[14.1062]GSQFYIR	1062	2	13.4974	366.139	8	b	1		1079.68	1082.33	4934.61	6470.27	8570.83	1364.34	1355.11	858.787		1216.37	1203.64	8723.45	2248.31	1023.62	1396.31	4716.76	1858.59	653.118	658.875	1496.03	1385.2	1367.42	748.097	554.979	1708.92	5384.85	404.74	4194.52	15038.9
GAS1-N40GS	FFYSNN[12.1062]GSQFYIR	1062	2	12.1846	127.039	1	b	1	714.521	2304.62	1658.34	2610.45	4132.76	6256.39	3080.17	1826.61	2412.83	1210	601.575	1718.37	4404.23	5721.87	907.382	2084.26	2805.28	4960.65	2447.86		2328.84	7660.36	10404.1	7012.14	3015.02	10503.5	5675.59	17314.9	13180.9	24750.1
GAS1-N40GS	FFYSNN[12.1062]GSQFYIR	1062	2	12.1846	138.055	2	b	1	2358.01	3365.63	2597.77			5237.39		2779.38	2034.71	2123.06	2393.09	3524.58		7784.03		4056.36		5716.13	3033.63	369.243		12402.2	22439.5	10248.4	6273.63	18855.5		39459.7	29589.6	48954
GAS1-N40GS	FFYSNN[12.1062]GSQFYIR	1062	2	12.1846	145.049	3	b	1	1814.52	3682.03	2414.12	5570.54	5858.28	8233.66	6127.78	4709.94	3751.22	2349.37	1864.49	3011.37	7466.96	11290.2	3156.84	4330.92	5711.26	7472.77	1492.93		3692.98	13038.6	17845.8	12537.6	5556.32	19018.8	10374.2	30322	25058.8	41051.3
GAS1-N40GS	FFYSNN[12.1062]GSQFYIR	1062	2	12.1846	163.06	4	b	1	3310.05	5794.42	7336.78	5885.26	11772.2	9400.46	7533.97	2804.9	3037.67	1734.29	2328.73	3192.8	10083.5	12138.5	6988.34	5607.92	8756.75	7092.66	2593.83		4337.14	19333.8	23694.4	15197.4	8577	26724.2	12293	43482.7	33690.1	57830.5
GAS1-N40GS	FFYSNN[12.1062]GSQFYIR	1062	2	12.1846	168.065	5	b	1	1023.67	2631.21	2898.56			4282.52		2614.56	2109.21	1563.13	1699.32	2143.52		4990.91		2657.16		3115.86	2025.51	148.932		8268.61	12175.4	7940.53	4475.32	13357.6		23331.3	17613.7	29868.3
GAS1-N40GS	FFYSNN[12.1062]GSQFYIR	1062	2	12.1846	186.076	6	b	1	673.344	1560.66	1097.94	1136.86	1683.67	1638.89		657.609	1676.67	865.141	405.924	802.949	937.095	2639.8		1227.47	1076.5	1858.76	958.609			3272.06	7602.56	3044.67	1809.52	6941.03		12197.1	8742.34	15789.4
GAS1-N40GS	FFYSNN[12.1062]GSQFYIR	1062	2	12.1846	204.087	7	b	1	5181.53	5215.62	4854.37			11192.6		4971.06	3194.46	3723.29	5213.33	5878		15722.8		8139.61		7357.59	5249.68	1228.07		15113.2	25156.7	14568.6	10840.7	34019.9		63966.7	50319.5	85503.8
GAS1-N40GS	FFYSNN[12.1062]GSQFYIR	1062	2	12.1846	366.139	8	b	1	2305.53	1574.91	2612.68			2679.74		2184.01	1182.08	1349.59	1543.39	2055.1		5671.25		1869.52		2638.18	2313.68	305.377		5491.93	10317.2	5547.13	4207.5	11418.5		24912.8	14647.5	25336.3
GAS1-N40GS	FFYSNN[30.1062]GSQFYIR	1062	2		127.039	1	b	1
GAS1-N40GS	FFYSNN[30.1062]GSQFYIR	1062	2		138.055	2	b	1
GAS1-N40GS	FFYSNN[30.1062]GSQFYIR	1062	2		145.049	3	b	1
GAS1-N40GS	FFYSNN[30.1062]GSQFYIR	1062	2		163.06	4	b	1
GAS1-N40GS	FFYSNN[30.1062]GSQFYIR	1062	2		168.065	5	b	1
GAS1-N40GS	FFYSNN[30.1062]GSQFYIR	1062	2		186.076	6	b	1
GAS1-N40GS	FFYSNN[30.1062]GSQFYIR	1062	2		204.087	7	b	1
GAS1-N40GS	FFYSNN[30.1062]GSQFYIR	1062	2		366.139	8	b	1
GAS1-N40GS	FFYSNN[23.1062]GSQFYIR	1062	2	22.7582	127.039	1	b	1			59.6838	25.8448	39.7122	37.9273	37.5168	66.7951	74.1976	83.518	32.9603	38.3241		20.8433	75.0394		34.5944	37.3051	74.9725			69.4538	35.9038		27.2136	19.6789	41.155	34.8596	73.5477	271.639
GAS1-N40GS	FFYSNN[23.1062]GSQFYIR	1062	2	22.7582	138.055	2	b	1	32.604	185.012	222.493		124.298	81.7223	126.303	68.1843	62.8517	60.0965	23.8931		64.0751	135.072			274.214	116.549	110.137	72.0921						33.0352			52.8106	159.111
GAS1-N40GS	FFYSNN[23.1062]GSQFYIR	1062	2	22.7582	145.049	3	b	1	37.5496	36.696	32.641	33.1292	17.6525	154.292				80.6102	28.4534	75.056	13.9712		36.3502		36.7682						37.3885	31.0533		29.211	29.0751	88.2047	7.34208	281.63
GAS1-N40GS	FFYSNN[23.1062]GSQFYIR	1062	2	22.7582	163.06	4	b	1		37.5341	75.0614			157.268		24.5998		115.524				28.8176		46.5383	92.9867	36.5307			38.4611	39.2537	104.066		23.2977	31.9776	76.1799	53.5436	75.1623
GAS1-N40GS	FFYSNN[23.1062]GSQFYIR	1062	2	22.7582	168.065	5	b	1		112.599	22.8436		31.0529	123.236	37.7035		51.4043			16.128	125.572				78.9354	36.8713	31.9093		113.668	37.5363		26.0917		47.0257	100.403	110.401		82.4447
GAS1-N40GS	FFYSNN[23.1062]GSQFYIR	1062	2	22.7582	186.076	6	b	1	94.8961	22.1013		22.7818	118.425	356.065	24.4525		144.105	70.5032	143.711	106.027				29.0758	40.2106			26.9959	37.3665	21.3219						60.3984	86.2288	318.181
GAS1-N40GS	FFYSNN[23.1062]GSQFYIR	1062	2	22.7582	204.087	7	b	1	36.3281	175.442	16.5799	134.928		57.9102		95.7827	27.154	203.546			47.5987	70.6966	75.0344	15.1297	25.0985			33.4775			14.4569		43.2743		36.8713		177.63
GAS1-N40GS	FFYSNN[23.1062]GSQFYIR	1062	2	22.7582	366.139	8	b	1			40.0906			66.4526				78.2948		32.3834		58.6132			26.2916		17.9588		35.2375	35.7171		47.9155	13.9374	57.8174			15.8811	222.778
GAS1-N40GS	FFYSNN[17.1062]GSQFYIR	1062	2	17.0796	127.039	1	b	1	69.9727		316.915		354.38	62.5532		104.194		111.155		426.765	51.6494		31.2502	80.3159		14.5603		95.3843		41.1906				247.539		91.5893
GAS1-N40GS	FFYSNN[17.1062]GSQFYIR	1062	2	17.0796	138.055	2	b	1	92.3776	83.0763	919.275	281.657	408.898	236.303		102.272		57.529		37.1482		189.128	108.475	62.4079	241.502			40.0591		289.237	506.709	190.326			26.7033
GAS1-N40GS	FFYSNN[17.1062]GSQFYIR	1062	2	17.0796	145.049	3	b	1		60.1485	1098.03	344.511	80.8365	377.324				135.674		250.278			102.265	178.692	100.43	376.686	93.6122	60.973		149.839	204.698	66.016	133.551		72.0091	22.4634	104.202
GAS1-N40GS	FFYSNN[17.1062]GSQFYIR	1062	2	17.0796	163.06	4	b	1		311.556	735.112	87.7096	77.4792	808.829		132.806		58.1014	76.9353	650.431	211.189		110.241	30.0256	140.871		28.2774	192.705	13.0659	166.443	141.862	186.364	97.7793	34.0957		291.663	43.1379
GAS1-N40GS	FFYSNN[17.1062]GSQFYIR	1062	2	17.0796	168.065	5	b	1			101.002	128.829		262.945				109.467		57.6881	47.8805	150.718			32.1942	85.2714	347.344	352.593			162.511		53.3937	124.415	57.8988	98.907	13.5692
GAS1-N40GS	FFYSNN[17.1062]GSQFYIR	1062	2	17.0796	186.076	6	b	1	154.568	34.18		31.1249		95.2089		72.3785	21.5572	143.934	42.4487				231.127	21.2936	49.3758	212.108	101.879	59.0036	43.8224		92.2506	186.823	16.504		44.6396		88.119
GAS1-N40GS	FFYSNN[17.1062]GSQFYIR	1062	2	17.0796	204.087	7	b	1	36.41	292.723	91.7506	106.145	681.709	1104.09		260.263			162.428		92.7171		54.9422	204.586	274.374	166.754	75.151	182.015	44.0792	215.174	501.988	342.518	124.069
GAS1-N40GS	FFYSNN[17.1062]GSQFYIR	1062	2	17.0796	366.139	8	b	1	298.211			331.739	195.241	264.054		230.57	119.396	327.946	26.7295			110.808	58.335	89.9703	496.775		104.712	125.735			159.505					116.958	37.9826
GAS1-N40GS	FFYSNN[9.1062]GSQFYIR	1062	2		127.039	1	b	1		227.069	32672.7			1941.31			505.922			569.936	2550.69		195.278	951.589	1640.17	1173.94	1571.47	563.884	2134.68	2249.94	905.125	145.529	269.735	976.193	1205.15			2721.78
GAS1-N40GS	FFYSNN[9.1062]GSQFYIR	1062	2		138.055	2	b	1				26.9638		226.66			67.517			84.7023	46.451		132.718	57.8723		169.265		403.086	260.314	518.676	447.41	378.588		142.543	129.296			2503.06
GAS1-N40GS	FFYSNN[9.1062]GSQFYIR	1062	2		145.049	3	b	1		611.07	42315.5			1794.88			431.349			142.826	897.803		618.191	2206.83	1015.72	1215.3	338.628		1934.25	1217.25	1499.1		183.707	568.767	1077.36			3214.21
GAS1-N40GS	FFYSNN[9.1062]GSQFYIR	1062	2		163.06	4	b	1		32.3727	21652.5			904.544			863.25			237.555	1741.39		565.41	651.631	1260.73	206.943	534.883		1712.46	914.153	1047.52		330.676	887.487	351.244			3851.75
GAS1-N40GS	FFYSNN[9.1062]GSQFYIR	1062	2		168.065	5	b	1		79.4165		285.658					89.104		146.615	151.702	61.82	18.8555			85.58		135.976	335.845	169.315	299.484	239.31	53.2943		136.669	261.49			1307.25
GAS1-N40GS	FFYSNN[9.1062]GSQFYIR	1062	2		186.076	6	b	1		84.5948											87.5435	113.701	63.4296		55.3495		309.499	222.94		116.246	78.4551			80.6498	70.6363			1616.48
GAS1-N40GS	FFYSNN[9.1062]GSQFYIR	1062	2		204.087	7	b	1		56.3603				239.493						44.7187				170.414		52.0425	59.8769	184.655	191.052	429.349	871.665	36.5788		203.152	307.526			2760.04
GAS1-N40GS	FFYSNN[9.1062]GSQFYIR	1062	2		366.139	8	b	1		150.927		145.523							16.6149	19.395	69.6398				76.8273	127.133	146.088	142.172		223.174	350.201	250.537	58.9742		97.2862			1860.21
GAS1-N40GS	FFYSNN[22.1062]GSQFYIR	1062	2	22.7344	127.039	1	b	1	34.1009		36.2791	30.0971	47.2813	40.4282		39.8434						22.8877	37.3702	33.396	92.9724			33.4762	33.514		37.7401		37.3899	22.0314	75.4079		109.203	322.379
GAS1-N40GS	FFYSNN[22.1062]GSQFYIR	1062	2	22.7344	138.055	2	b	1	34.1464	35.5444		55.9658	125.208	229.519		36.869		87.7756	94.9897	80.268	170.985	115.331	46.7385	71.8285	2.58487	48.3722		37.5318	60.2186		76.9821		70.8417				148.007
GAS1-N40GS	FFYSNN[22.1062]GSQFYIR	1062	2	22.7344	145.049	3	b	1	35.1705	112.406	151.861		71.1467	78.2569	76.5087		10.0706	63.3826	26.9211	72.4002	150.955		33.2918		40.3133	33.3176	70.0394	37.5337		21.3137	26.7699	35.8031		34.3197	19.4044	63.5791	40.833	241.002
GAS1-N40GS	FFYSNN[22.1062]GSQFYIR	1062	2	22.7344	163.06	4	b	1		112.597	102.345	69.6411		102.583	27.8637							31.0491	65.1159	110.928			10.379		68.4291	31.8218			11.247	32.3327	85.1051	48.8002	30.9279
GAS1-N40GS	FFYSNN[22.1062]GSQFYIR	1062	2	22.7344	168.065	5	b	1		19.0688	134.749			28.9507			26.0423	32.928		15.4967				30.4488	71.906			73.5084	39.192		104.699	99.6134			105.699	100.972		84.9756
GAS1-N40GS	FFYSNN[22.1062]GSQFYIR	1062	2	22.7344	186.076	6	b	1	15.225	130.306			71.39		31.3508		215.651	17.3244	80.0974	14.0764	71.2607						36.7737	112.6	61.3002	48.8801	93.364	16.9078		6.4194	26.6181	60.1746		289.471
GAS1-N40GS	FFYSNN[22.1062]GSQFYIR	1062	2	22.7344	204.087	7	b	1		108.763					32.5671	70.7711	94.2289		171.733		207.381	90.8233		14.0177	23.1147	70.4336	33.6783	29.9135		108.323			62.736		28.2864
GAS1-N40GS	FFYSNN[22.1062]GSQFYIR	1062	2	22.7344	366.139	8	b	1	75.3767		234.352			195.487			61.2646	143.066	86.2657	104.702	36.6076	41.8904	76.4836		34.0315				32.6043	76.0637		73.0683	34.9297					52.1539
GAS1-N40GS	FFYSNN[6.1062]GSQFYIR	1062	2	5.64513	127.039	1	b	1	78.0419	10.7316					71.3908		75.0668		40.8299	37.5343		16.5237	135.249	73.0985		22.2439	34.0386				71.2545	29.6728	78.5783		97.6416		11.5887	75.0682
GAS1-N40GS	FFYSNN[6.1062]GSQFYIR	1062	2	5.64513	138.055	2	b	1	37.507	37.5315				37.5327	37.5085	36.8629		63.3347	133.856				16.5052	36.7682	37.5297	75.0417				36.3507	61.3136			37.534		71.421		37.5341
GAS1-N40GS	FFYSNN[6.1062]GSQFYIR	1062	2	5.64513	145.049	3	b	1		33.8161	48.4842	73.2976	205.901	150.132	187.627	87.8253	32.3076			50.9417	37.3891	8.36423	134.435	150.107		28.8955		3.98367	108.566		187.666	25.0272		225.169	71.5762	87.3481	31.0522	79.1206
GAS1-N40GS	FFYSNN[6.1062]GSQFYIR	1062	2	5.64513	163.06	4	b	1		112.43	149.164	112.6	63.468		146.652	61.2263		215.271	367.116	75.0397			187.432	149.786	84.8684	150.103	103.53		224.047	34.1092	137.344	124.305		91.363	130.112	150.127		218.248
GAS1-N40GS	FFYSNN[6.1062]GSQFYIR	1062	2	5.64513	168.065	5	b	1	67.3173					21.8418	37.5344		37.5337	19.177			36.3271	37.5338						23.5684	37.5341		26.9247						26.6191	37.5341
GAS1-N40GS	FFYSNN[6.1062]GSQFYIR	1062	2	5.64513	186.076	6	b	1		37.5068			33.8046								37.3893							19.8403	35.8278			7.0941				37.5305
GAS1-N40GS	FFYSNN[6.1062]GSQFYIR	1062	2	5.64513	204.087	7	b	1					37.5913		18.264		149.948		37.4882	32.6708		37.2837	8.36392				38.1155	11.3187	31.5842		71.0536	35.1818
GAS1-N40GS	FFYSNN[6.1062]GSQFYIR	1062	2	5.64513	366.139	8	b	1			74.9036		37.2231								36.8718				37.3882					33.9886			37.5337		37.2684
GAS1-N40GS	FFYSNN[16.1062]GSQFYIR	1062	2	15.7875	127.039	1	b	1	698.317	661.753	224.759	339.844			1285.54	626.293	927.576	119.329	666.617	1323.62	414.549	960.134	555.572	595.408	1542.52	440.074	516.24	468.98	749.515	849.894	1130.99	475.222	194.532	1476.69	2190.12	1247.75	1130.75
GAS1-N40GS	FFYSNN[16.1062]GSQFYIR	1062	2	15.7875	138.055	2	b	1	1975.61	901.31	1008.73	153.393			1150.28	855.715	1180.57	1429.09	147.401	734.332		1066.58	483.964	852.356	2195.07	553.606	909.23	847.078	961.659	1692.68	1430.91	2087.45	667.735	2989.3	4476.88	1660.75	1635.76
GAS1-N40GS	FFYSNN[16.1062]GSQFYIR	1062	2	15.7875	145.049	3	b	1	1440.42	1460.34	1579.23	991.08			1323.18	1644.36	1179.25	637.954	739.925	545.29		1787.09	589.15	853.867	3007.56	1771.85	1204.24	971.392	1274.7	1735.61	1774.12	1373.36	170.022	3034.83	3436.15	1488.36	1169.31
GAS1-N40GS	FFYSNN[16.1062]GSQFYIR	1062	2	15.7875	163.06	4	b	1	2899.43	1326.48	1688.36	136.482			2813.51	2459.61	1541.79	1212.01	997.414	1411.28	1530.71	1680.26	1676.44	1594.24	4417.85	2630.74	2272.57	1213.66	1684.8	1387.21	2112.23	2742.86	886.658	4082.75	5597.18	2275.01	2683.1
GAS1-N40GS	FFYSNN[16.1062]GSQFYIR	1062	2	15.7875	168.065	5	b	1	821.869	1020.34	1102.05	377.097			540.191	800.773	581.468	324.114	324.666	568.787	547.051	521.549	1315.84	325.139	1559.73	1057.45	210.979	420.93	678.503	1022.23	1374.03	1015.93	481.098	2518.1	2113.04	650.006	806.047
GAS1-N40GS	FFYSNN[16.1062]GSQFYIR	1062	2	15.7875	186.076	6	b	1	952.952	239.308	387.769				525.041	149.56		208.133	350.479	404.801	703.479	654.916	487.596		1007.2	647.834	179.864	303.235	494.488	435.41	721.456	246.575	87.2386	574.813	986.017	209.878	224.478
GAS1-N40GS	FFYSNN[16.1062]GSQFYIR	1062	2	15.7875	204.087	7	b	1	1674.63	1394.79	1484.18	677.214			2374.82	2086.12	2109.52	721.059	1081.03	2116.08		3067.39	1861.53	1509.97	2679.95	2465.59	1080.77	923.39	1840.04	1474.51	2441.77	3539.78	531.275	4089.34	5573.12	2076.26	2210.77
GAS1-N40GS	FFYSNN[16.1062]GSQFYIR	1062	2	15.7875	366.139	8	b	1	1304.84	627.282	959.213	404.591			658.232	736.506	370.73	247.439		628.698	670.009	1375.57	592.261	179.453	1383.51	405.802	536.736	222.401	651.74	613.31	937.805	473.12		1462.93	1799.9	817.557	1053.92
GAS1-N40GS	FFYSNN[25.1062]GSQFYIR	1062	2	24.5641	127.039	1	b	1	64.3587								37.5342			34.8603		36.9878										23.568					10.7323	29.3583
GAS1-N40GS	FFYSNN[25.1062]GSQFYIR	1062	2	24.5641	138.055	2	b	1	28.7778							37.533		31.0523	14.551	26.8771		74.5099			40.7528					36.9964					37.2094		23.5092	84.3059
GAS1-N40GS	FFYSNN[25.1062]GSQFYIR	1062	2	24.5641	145.049	3	b	1						20.9287						31.0523	72.6811	22.3965				23.5683		13.3764	20.6159			12.5543					14.069	231.012
GAS1-N40GS	FFYSNN[25.1062]GSQFYIR	1062	2	24.5641	163.06	4	b	1		37.8364	32.1058		91.7852	24.2203		39.9041	144.535		12.9398		30.6977	29.7326								37.2685	84.1761	13.0676		37.5277			35.4498	376.799
GAS1-N40GS	FFYSNN[25.1062]GSQFYIR	1062	2	24.5641	168.065	5	b	1													37.389														37.208	37.5356	102.742
GAS1-N40GS	FFYSNN[25.1062]GSQFYIR	1062	2	24.5641	186.076	6	b	1	73.9557		37.527	26.271	26.8593				84.9026	14.075					69.5328	35.1377	35.7575	18.6414	186.079	34.5415	74.8963	20.4512	37.388	14.0761			68.6585		4.96903	55.7678
GAS1-N40GS	FFYSNN[25.1062]GSQFYIR	1062	2	24.5641	204.087	7	b	1	74.0172	36.1511	15.1916	75.9936							35.1839		9.71635	41.3504	56.2667	14.0758		23.5683	17.4471	23.5687		27.3857			31.0534	37.5337			37.3893	505.462
GAS1-N40GS	FFYSNN[25.1062]GSQFYIR	1062	2	24.5641	366.139	8	b	1	26.0797			87.941	23.568	38.2151					35.1839	74.2275	28.1076		23.0812				36.8706		36.8712	37.2685	37.5083		14.075		34.601	15.5831
GAS1-N40GS	FFYSNN[10.1037]GSQFYIR	1037	2	10.0837	127.039	1	b	1	5017.73	3413.07	4099	9477.4	12722.2	12752.7	7734.53	4663	4461.02	5745.93	2917.23	7256.78	18347.7	10232.2	5077.66	7994.88		343.108	9308.36	5012.85	8450.69	1574.1	1109.89	919.933	725.442	442.556	1036.49	2825.1	3109	389.556
GAS1-N40GS	FFYSNN[10.1037]GSQFYIR	1037	2	10.0837	138.055	2	b	1	3805.45	3482.48	3117.79	8991.74	9447.45	10812.4	4519.52	4021.33	3233.41	4515.87	2939.57	5765.98	17786.9	9596.87	5296.7	7590.12		1390.97	8202.76	4627.6	7225.97	1124.86	705.205	674.56	539.613	1708.5	1218.15	2463.38	3161.51	280.5
GAS1-N40GS	FFYSNN[10.1037]GSQFYIR	1037	2	10.0837	145.049	3	b	1	7168.24	6122	7848.81	15353.5	20056.7	20507.8	11116.6	7499.65	4850.53	9459.98	5544.9	10710.1	35500.3	15872.9	8401.32	12080.5		433.378	16207.7	8019.13	12057.4	1583.17	1649.76	1026.86	1171.24		1305.53	3812.2	5776.79	949.078
GAS1-N40GS	FFYSNN[10.1037]GSQFYIR	1037	2	10.0837	163.06	4	b	1	9051.03	9496.19	10048.7	20588.1	26043.7	29209.4	14968.4	9744.96	7127.04	11144.5	5948.79	14996.8	46770.8	25614.3	12355.5	17161.9		578.71	19452.1	11476.2	20126.6	2199.03	3046.56	1531.19	1730.56	1366.71	1685.74	6740.49	7804.93	707.118
GAS1-N40GS	FFYSNN[10.1037]GSQFYIR	1037	2	10.0837	168.065	5	b	1	2958.43	1762.22	1767.06	6023.06	6290.01	6747.83	3693.22	2200.47	1633.05	3244.49	1971.23	3661.22	12804.4	7105.95	3040.71	4626.42		548.686	5697.52	2481.39	5045.04	544.874	716.171	640.966	683.094	1261.33	436.752	1255.8	1859.19
GAS1-N40GS	FFYSNN[10.1037]GSQFYIR	1037	2	10.0837	186.076	6	b	1	1072.79	991.231	958.299	2532.86	3745.43	3383.98	2068.84	993.635	901.684	1377.31	949.716	1761.35	5400.45	2992.14	2054.31	2347.4	140.991	825.952	2717.84	1845.4	1930.09	99.5038	158.711		204.404	364.993	197.141	1297.63	836.848
GAS1-N40GS	FFYSNN[10.1037]GSQFYIR	1037	2	10.0837	204.087	7	b	1	5929.13	5833.17	3628.13	13568.5	16871.8	17160.4	9843.45	6488.03	3725.51	8504.96	3978.47	9555.6	28638.3	17383.9	9498.2	11670.7	350.592	2519.52	11453	6771.48	11599.8	1814.15	1485.72	1736.86	1569.68	922.879	1608	3282.97	3467.47
GAS1-N40GS	FFYSNN[10.1037]GSQFYIR	1037	2	10.0837	366.139	8	b	1	2606.74	2533.06	1910.89	6485.61	7417.61	6965.28	3671.18	2527.9	1766.11	2794.52	1973.86	4337.7	13423.3	6776.18	3957.45	5425.14		973.649	4794.35	3378.06	5281.61	564.046	967.291	298.926	662.68	529.047	840.503	1422.02	1786.4	147.752
GAS1-N40GS	FFYSNN[29.1037]GSQFYIR	1037	2		127.039	1	b	1																			31.0526
GAS1-N40GS	FFYSNN[29.1037]GSQFYIR	1037	2		138.055	2	b	1																						31.0528								36.8716
GAS1-N40GS	FFYSNN[29.1037]GSQFYIR	1037	2		145.049	3	b	1
GAS1-N40GS	FFYSNN[29.1037]GSQFYIR	1037	2		163.06	4	b	1									34.5477
GAS1-N40GS	FFYSNN[29.1037]GSQFYIR	1037	2		168.065	5	b	1																		23.3811												34.37
GAS1-N40GS	FFYSNN[29.1037]GSQFYIR	1037	2		186.076	6	b	1													36.8713									35.184
GAS1-N40GS	FFYSNN[29.1037]GSQFYIR	1037	2		204.087	7	b	1									36.8715																			35.1838
GAS1-N40GS	FFYSNN[29.1037]GSQFYIR	1037	2		366.139	8	b	1													36.8713					23.5687	14.077									20.9969
GAS1-N40GS	FFYSNN[8.1037]GSQFYIR	1037	2	7.27252	127.039	1	b	1	2089.04	1997.55		1363.3	3045.33		1301.66	675.152	490.411	933.12	3100.83	961.104		1244.34	218.541	986.671	823.326	653.868		99.9911		839.193		639.117	426.462	305.964	434.693	696.595	471.566	213.294
GAS1-N40GS	FFYSNN[8.1037]GSQFYIR	1037	2	7.27252	138.055	2	b	1	333.678	228.96	201.799		165.6	467.535	189.648	218.088	288.333	97.7955			227.993	262.442		413.93	63.3911			38.5062	209.509	109.706	80.1916	136.688			287.117	230.008	489.956
GAS1-N40GS	FFYSNN[8.1037]GSQFYIR	1037	2	7.27252	145.049	3	b	1	5142.48	1654.45		1668.96	3278.02	902.014	1589.83	493.809	1143.43		1988.01	1191.22		1012.03	28.2625	2224.28	941.789	234.324	398.757	274.847		2074.4		709.434	360.031		276.576	1214.95	1027.72
GAS1-N40GS	FFYSNN[8.1037]GSQFYIR	1037	2	7.27252	163.06	4	b	1	2705.61	1140.33			2231.92	793.547	1005.47	465.212	740.106	1266.16	1838.32	1219.77		2431.52	297.137	1896.01	453.023	380.291	552.971	646.031		705.653		408.45	495.074	167.024	362.407	1059.39	1276.55	480.887
GAS1-N40GS	FFYSNN[8.1037]GSQFYIR	1037	2	7.27252	168.065	5	b	1	296.45	182.881			189.379		245.649	65.8632	87.9826	339.041		245.39	95.231		76.9746				43.9865	163.546			16.1459	83.5597		108.906		141.605		158.486
GAS1-N40GS	FFYSNN[8.1037]GSQFYIR	1037	2	7.27252	186.076	6	b	1	294.314	344.219		252.103		435.709	255.836		127.816		122.718		41.9841	127.524	27.7884	76.9963	126.684				75.4204	124.662	83.3918	51.0008		25.6466
GAS1-N40GS	FFYSNN[8.1037]GSQFYIR	1037	2	7.27252	204.087	7	b	1	608.858	753.28	344.603	467.802	169.246	290.065	170.351		227.948	176.123	399.257	929.281	605.527	221.419	170.158	134.906	142.629	117.759	108.634				467.224		140.011	97.9216		175.183	535.666	546.508
GAS1-N40GS	FFYSNN[8.1037]GSQFYIR	1037	2	7.27252	366.139	8	b	1	70.2554	231.996	245.259	238.832	172.374	264.681		122.138	106.464	146.746	118.458	115.575	113.702	163.67	57.5345	146.025	137.151	81.9929	174.113	134.656	117.25	79.5412	175.626	29.6634	24.4284				158.427	122.376
GAS1-N40GS	FFYSNN[20.1037]GSQFYIR	1037	2	19.5496	127.039	1	b	1	220.399			59.2095	57.4097		16.7792		33.4879	37.5329			71.6453	67.4746	36.8556		21.2117	76.839	60.0181			30.5258				99.844	5.90641	37.4981		302.841
GAS1-N40GS	FFYSNN[20.1037]GSQFYIR	1037	2	19.5496	138.055	2	b	1	51.4121			221.15	170.144	41.9676		68.2178	81.346		58.1687	157.104		9.64362		73.3408	104.83	124.847	55.1363	57.2326		96.9493	137.063	36.8289	24.5214	239.461	8.88874	37.3623	122.638
GAS1-N40GS	FFYSNN[20.1037]GSQFYIR	1037	2	19.5496	145.049	3	b	1	268.862	31.7268	20.8119		71.5894	98.5181		31.6127	55.7739		63.7904	116.107	27.2335	182.127	67.0501			61.0262		114.786	95.0403	111.134		21.9309	13.1967	130.611			29.6747
GAS1-N40GS	FFYSNN[20.1037]GSQFYIR	1037	2	19.5496	163.06	4	b	1	79.7132	35.8105		118.839		137.838	68.3395	37.2777		30.4655		12.5169		102.132	126.177		39.1937	40.2359	49.6917	23.334			75.0659	43.3265	65.587			16.0709	36.7182	172.098
GAS1-N40GS	FFYSNN[20.1037]GSQFYIR	1037	2	19.5496	168.065	5	b	1		136.13	62.4411	184.925			32.2696					23.7149	104.282		69.4023	153.889	44.1493				153.214					5.72535	37.1388
GAS1-N40GS	FFYSNN[20.1037]GSQFYIR	1037	2	19.5496	186.076	6	b	1	239.956	159.16	249.567		77.676	297.712	109.965		71.8903	79.4222	31.3872	101.68	29.3076	114.766	125.344		42.3546	269.255		57.0016	154.33	30.9921	140.036		20.3105	182.171	45.2891	34.582
GAS1-N40GS	FFYSNN[20.1037]GSQFYIR	1037	2	19.5496	204.087	7	b	1	97.4146		40.6058			40.9305	24.5435	87.1788	101.519	178.039	58.1568		23.4512	17.6807		222.037	142.93	57.9483	14.4153		81.6612	53.7564	58.262	72.7781
GAS1-N40GS	FFYSNN[20.1037]GSQFYIR	1037	2	19.5496	366.139	8	b	1	795.755			196.554	161.992	379.494			27.2865		162.502	116.033	204.957		16.988			48.013	139.478	55.3652	34.8145		44.0856	57.8156		129.502	111.185	84.888	35.1697
GAS1-N40GS	FFYSNN[22.1037]GSQFYIR	1037	2	21.4967	127.039	1	b	1				75.038	74.8897	54.3735			5.71059	24.6463	20.9827		75.0666	26.5706	125.513	37.5303	20.9982	34.6121			8.47138		37.5952	23.8038	24.3327	8.18215	66.4018	36.8697		170.146
GAS1-N40GS	FFYSNN[22.1037]GSQFYIR	1037	2	21.4967	138.055	2	b	1	135.496	29.8619	134.357	49.613			14.6265	78.3598	32.0814			69.9779	34.2759			46.8447							51.5853		74.8242	17.1015	106.081	75.5509
GAS1-N40GS	FFYSNN[22.1037]GSQFYIR	1037	2	21.4967	145.049	3	b	1		70.4595	53.4642		31.3166		77.3546	35.178	43.8858	56.1166				109.188			49.5518	110.033	20.9978		32.5993	33.5276	101.916	18.4687		25.0691	30.6769	36.3499
GAS1-N40GS	FFYSNN[22.1037]GSQFYIR	1037	2	21.4967	163.06	4	b	1	73.5743	35.6533	37.1008		34.6475			14.0758	33.7035			149.95	90.2075		46.897					89.1051	33.7612	34.1458			9.63097			37.3892		355.754
GAS1-N40GS	FFYSNN[22.1037]GSQFYIR	1037	2	21.4967	168.065	5	b	1	135.696	36.3497	165.79						20.4538	70.3817			40.331		66.2581		35.1692	36.7492		20.4544			21.9244	102.665		55.15				189.459
GAS1-N40GS	FFYSNN[22.1037]GSQFYIR	1037	2	21.4967	186.076	6	b	1	43.72		46.5995			13.8076	34.9055	86.5178	57.5932	24.5345		120.871		142.604	74.9068	37.4642	65.3393	153.703	13.5984	14.6262				62.9157					35.9854
GAS1-N40GS	FFYSNN[22.1037]GSQFYIR	1037	2	21.4967	204.087	7	b	1	43.9222	13.2375	90.1058	149.686		88.9328	67.9207		111.106		71.4412			14.8185	34.9436		26.4807	16.4512		46.3746		35.8884			73.6153	164.43	173.485		36.762	108.216
GAS1-N40GS	FFYSNN[22.1037]GSQFYIR	1037	2	21.4967	366.139	8	b	1	16.2958				106.796				160.125	222.544	86.3819			144.348	33.7113	25.5468	31.0535		22.52			107.048	67.2949	74.1303		15.8033			69.9802	379.023
GAS1-N40GS	FFYSNN[21.1037]GSQFYIR	1037	2	21.4899	127.039	1	b	1			144.192		16.7893					23.8418	18.0031				33.4769			15.8115	11.2333			31.6985	35.1832	33.9908				37.5302	23.5608
GAS1-N40GS	FFYSNN[21.1037]GSQFYIR	1037	2	21.4899	138.055	2	b	1	82.2253	22.1038	194.568		77.8941		26.6287	65.7285	119.386		33.3539	26.3327	18.356			37.7889	87.1153	22.4643	68.7868	47.5422	76.1952	38.6933	51.1351		100.861	116.726		37.3612	91.0928
GAS1-N40GS	FFYSNN[21.1037]GSQFYIR	1037	2	21.4899	145.049	3	b	1		49.75	117.46	107.644	71.7915	150.474	110.797		37.5067	43.5364		64.0974		52.89	71.9659		11.5239	31.9768	34.0455	16.3271	29.1197	32.8467	86.1884	35.2246					36.7676
GAS1-N40GS	FFYSNN[21.1037]GSQFYIR	1037	2	21.4899	163.06	4	b	1	70.0407	35.184	9.15275	53.4697	73.3637	71.1759		26.9249	37.8817		31.0524	36.3828	9.20058		110.992			101.07	34.6431	67.9747	41.6223	36.2279			128.992		37.077	17.5462
GAS1-N40GS	FFYSNN[21.1037]GSQFYIR	1037	2	21.4899	168.065	5	b	1	195.894		91.9802		61.683	50.6264		67.6114	99.2184	74.8386	62.1469	15.4747		110.551	75.0639	26.6791		33.4609	26.2796	17.5304			27.2989	102.745		81.9515	47.5656		23.5693
GAS1-N40GS	FFYSNN[21.1037]GSQFYIR	1037	2	21.4899	186.076	6	b	1	94.7008			61.6155	252.103		97.779		121.313		27.4611	53.0803	59.9831	180.85	130.827	38.3883	37.5072	20.9953		25.8796		118.018		66.5383		84.9814	34.6756	37.4884	23.5693
GAS1-N40GS	FFYSNN[21.1037]GSQFYIR	1037	2	21.4899	204.087	7	b	1	86.0544	15.528	72.0794		68.6827		162.315	62.2885	34.4659					54.7553		110.108	24.8673				13.5985				93.1414				23.5682
GAS1-N40GS	FFYSNN[21.1037]GSQFYIR	1037	2	21.4899	366.139	8	b	1	15.7755		349.496		88.8724	223.709	105.579	80.0411	252.324	228.992			13.3249	96.4789	18.1119	23.9272	40.5589		264.247			37.7451	39.0117	45.1337	103.537		48.1693	90.2965
GAS1-N40GS	FFYSNN[17.1037]GSQFYIR	1037	2	17.518	127.039	1	b	1	58.2883		130.551	167.956	27.8038	335.375	201.165			91.4433	7.94422	252.366			90.2012	60.5253		122.466		7.79004				57.9521	23.737		35.8447	99.0659
GAS1-N40GS	FFYSNN[17.1037]GSQFYIR	1037	2	17.518	138.055	2	b	1	98.506	130.982	298.943	246.262	133.047	277.589	223.848		41.7373			203.614	156.736	143.228		62.9868	211.085	187.828	444.747			134.797	109.02		83.9279	148.851	22.0925	109.548
GAS1-N40GS	FFYSNN[17.1037]GSQFYIR	1037	2	17.518	145.049	3	b	1	94.6854	66.0274	353.024	72.1725		726.646	90.6645		80.8154	40.1078	63.0714	664.888	62.6304	103.627	95.678	251.544	172.466		220.286		125.643	23.1136		138.903		167.06		69.4368
GAS1-N40GS	FFYSNN[17.1037]GSQFYIR	1037	2	17.518	163.06	4	b	1	167.639	44.3624	290.181	525.596	101.773	436.964	164.936	129.645	109.366	99.7853		345.612	268.62	343.566	393.185	545.561	419.007	196.024	63.0258	23.0802	83.4932				7.42823	89.4141	211.598	34.9883	235.275
GAS1-N40GS	FFYSNN[17.1037]GSQFYIR	1037	2	17.518	168.065	5	b	1	406.464	114.3			231.034	379.523				201.997	235.522	81.7218					21.1328	237.605	259.892	34.7792	13.6229		28.7215	216.179	57.6366	57.4587		102.222
GAS1-N40GS	FFYSNN[17.1037]GSQFYIR	1037	2	17.518	186.076	6	b	1	176.083		137.392	43.2268	57.2336	89.8985				81.4473	253.409	314.102	35.9781	69.1496		119.808	32.9561	464.375	40.2987	64.3972	81.185		43.4046	100.339	26.4053	74.5872	35.9638
GAS1-N40GS	FFYSNN[17.1037]GSQFYIR	1037	2	17.518	204.087	7	b	1	182.755	94.288	257.293		144.038	1023.86	63.6979		158.892	447.831		189.748	108.19	367.855		234.5	252.957	209.753	203.877	59.4157		65.5284	152.097		22.5183	266.421	43.3021		119.045
GAS1-N40GS	FFYSNN[17.1037]GSQFYIR	1037	2	17.518	366.139	8	b	1	82.5759	49.0092	168.98	151.842	581.033	409.763	139.066	157.355	20.3311	25.4294		443.971		59.2029		111.041	197.13	395.71	122.848			49.6512	305.721	83.8547	226.635	42.0938	73.398	228.751
GAS1-N40GS	FFYSNN[28.1037]GSQFYIR	1037	2	28.08	127.039	1	b	1	10.8283						37.5327						17.1434						37.5333
GAS1-N40GS	FFYSNN[28.1037]GSQFYIR	1037	2	28.08	138.055	2	b	1								37.5342					37.5332																37.5339
GAS1-N40GS	FFYSNN[28.1037]GSQFYIR	1037	2	28.08	145.049	3	b	1			21.3046		37.5342		37.5299																							37.5061
GAS1-N40GS	FFYSNN[28.1037]GSQFYIR	1037	2	28.08	163.06	4	b	1					8.20928				34.5477																					37.5297
GAS1-N40GS	FFYSNN[28.1037]GSQFYIR	1037	2	28.08	168.065	5	b	1															42.8891			37.2349												37.213
GAS1-N40GS	FFYSNN[28.1037]GSQFYIR	1037	2	28.08	186.076	6	b	1	37.5336																			30.9569			8.80104
[truncated: 6,010 more rows]

## Sheet: Peptides
Protein	Peptide	Precursor MZ	Precursor Charge	RT	20141205_002_BY4741_cw_2 (20141205_002_BY4741_cw_2.wiff (sample 1))	20141205_003_BY4741_cw_3 (20141205_003_BY4741_cw_3.wiff (sample 1))	20141205_004_BY4741_cw_4 (20141205_004_BY4741_cw_4.wiff (sample 1))	20141205_006_Dost3_cw_2 (20141205_006_Dost3_cw_2.wiff (sample 1))	20141205_007_Dost3_cw_3 (20141205_007_Dost3_cw_3.wiff (sample 1))	20141205_008_Dost3_cw_4 (20141205_008_Dost3_cw_4.wiff (sample 1))	20141205_010_Dost5_cw_2 (20141205_010_Dost5_cw_2.wiff (sample 1))	20141205_011_Dost5_cw_3 (20141205_011_Dost5_cw_3.wiff (sample 1))	20141205_012_Dost5_cw_4 (20141205_012_Dost5_cw_4.wiff (sample 1))	20141205_014_Dost6_cw_2 (20141205_014_Dost6_cw_2.wiff (sample 1))	20141205_015_Dost6_cw_3 (20141205_015_Dost6_cw_3.wiff (sample 1))	20141205_016_Dost6_cw_4 (20141205_016_Dost6_cw_4.wiff (sample 1))	20141205_038_Dalg6_cw_2 (20141205_038_Dalg6_cw_2.wiff (sample 1))	20141205_039_Dalg6_cw_3 (20141205_039_Dalg6_cw_3.wiff (sample 1))	20141205_040_Dalg6_cw_4 (20141205_040_Dalg6_cw_4.wiff (sample 1))	20141205_042_Dalg8_cw_2 (20141205_042_Dalg8_cw_2.wiff (sample 1))	20141205_043_Dalg8_cw_3 (20141205_043_Dalg8_cw_3.wiff (sample 1))	20141205_044_Dalg8_cw_4 (20141205_044_Dalg8_cw_4.wiff (sample 1))	20141205_026_Ddie2_cw_2 (20141205_026_Ddie2_cw_2.wiff (sample 1))	20141205_027_Ddie2_cw_3 (20141205_027_Ddie2_cw_3.wiff (sample 1))	20141205_028_Ddie2_cw_4 (20141205_028_Ddie2_cw_4.wiff (sample 1))	20141205_030_Dalg3_cw_2 (20141205_030_Dalg3_cw_2.wiff (sample 1))	20141205_031_Dalg3_cw_3 (20141205_031_Dalg3_cw_3.wiff (sample 1))	20141205_032_Dalg3_cw_4 (20141205_032_Dalg3_cw_4.wiff (sample 1))	20141205_046_Dalg9_cw_2 (20141205_046_Dalg9_cw_2.wiff (sample 1))	20141205_047_Dalg9_cw_3 (20141205_047_Dalg9_cw_3.wiff (sample 1))	20141205_048_Dalg9_cw_4 (20141205_048_Dalg9_cw_4.wiff (sample 1))	20141205_050_Dalg12_cw_2 (20141205_050_Dalg12_cw_2.wiff (sample 1))	20141205_051_Dalg12_cw_3 (20141205_051_Dalg12_cw_3.wiff (sample 1))	20141205_052_Dalg12_cw_3 (20141205_052_Dalg12_cw_3.wiff (sample 1))		Peptide	20141205_002_BY4741_cw_2 (20141205_002_BY4741_cw_2.wiff (sample 1))	20141205_003_BY4741_cw_3 (20141205_003_BY4741_cw_3.wiff (sample 1))	20141205_004_BY4741_cw_4 (20141205_004_BY4741_cw_4.wiff (sample 1))	20141205_006_Dost3_cw_2 (20141205_006_Dost3_cw_2.wiff (sample 1))	20141205_007_Dost3_cw_3 (20141205_007_Dost3_cw_3.wiff (sample 1))	20141205_008_Dost3_cw_4 (20141205_008_Dost3_cw_4.wiff (sample 1))	20141205_010_Dost5_cw_2 (20141205_010_Dost5_cw_2.wiff (sample 1))	20141205_011_Dost5_cw_3 (20141205_011_Dost5_cw_3.wiff (sample 1))	20141205_012_Dost5_cw_4 (20141205_012_Dost5_cw_4.wiff (sample 1))	20141205_014_Dost6_cw_2 (20141205_014_Dost6_cw_2.wiff (sample 1))	20141205_015_Dost6_cw_3 (20141205_015_Dost6_cw_3.wiff (sample 1))	20141205_016_Dost6_cw_4 (20141205_016_Dost6_cw_4.wiff (sample 1))	20141205_038_Dalg6_cw_2 (20141205_038_Dalg6_cw_2.wiff (sample 1))
[truncated: 999 more rows]
[truncated: 28 more columns]
